# Supplementary material for: The whole transcriptome regulation as a function of mitochondrial polymorphisms and aging in Caenorhabditis elegans
Source: Aging (Albany NY). 2020 Feb 4;12(3):2453–70. doi: 10.18632/aging.102754 (PMC7041728; doi:10.18632/aging.102754)
Supplement: Supplementary Table 1 [file aging-12-102754-s003..xlsx]

## Sheet: Sheet1
CHR	SNP	BP	minor allele	major allele	OR	CHISQ	P value	FDR
6	rs1301	14888419	N2	CB4856	0.2766	16.8	4.155e-05	0.0151959
6	rs1302	14961400	N2	CB4856	0.2766	16.8	4.155e-05	0.0151959
6	rs1303	14961815	N2	CB4856	0.2766	16.8	4.155e-05	0.021625
6	rs1283	6152521	N2	CB4856	0	14.82	0.0001184	0.021625
6	rs1284	6248524	N2	CB4856	0	14.82	0.0001184	0.039797
6	rs1285	6310598	N2	CB4856	0	12.55	0.0003952	0.039797
6	rs1286	6319890	N2	CB4856	0	12.55	0.0003952	0.039797
2	rs439	6672335	CB4856	N2	2.806	11.52	0.0006891	0.039797
6	rs1310	15366117	N2	CB4856	0.3619	11.46	0.0007096	0.039797
6	rs1311	15500580	N2	CB4856	0.3619	11.46	0.0007096	0.039797
6	rs1312	15500713	N2	CB4856	0.3619	11.46	0.0007096	0.039797
2	rs426	5598604	CB4856	N2	2.773	11.42	0.0007263	0.039797
2	rs427	5860815	CB4856	N2	2.773	11.42	0.0007263	0.039797
2	rs428	5862803	CB4856	N2	2.773	11.42	0.0007263	0.039797
6	rs1296	14636404	N2	CB4856	0.3439	11.01	0.0009052	0.039797
6	rs1297	14678987	N2	CB4856	0.3439	11.01	0.0009052	0.039797
5	rs1188	19933932	CB4856	N2	2.674	9.964	0.001597	0.039797
5	rs1190	20196865	CB4856	N2	2.674	9.964	0.001597	0.039797
5	rs1191	20198668	CB4856	N2	2.674	9.964	0.001597	0.039797
6	rs1304	15074614	N2	CB4856	0.385	9.888	0.001663	0.039797
3	rs627	2487740	N2	CB4856	0.3908	9.728	0.001815	0.039797
6	rs1305	15137625	N2	CB4856	0.3908	9.728	0.001815	0.039797
6	rs1306	15138096	N2	CB4856	0.3908	9.728	0.001815	0.039797
1	rs25	12729813	CB4856	N2	0.3585	9.615	0.00193	0.039797
6	rs1308	15252244	N2	CB4856	0.3951	9.608	0.001938	0.039797
6	rs1309	15330737	N2	CB4856	0.3951	9.608	0.001938	0.039797
6	rs1282	6073085	N2	CB4856	0.127	9.568	0.00198	0.039797
2	rs438	6627059	CB4856	N2	2.54	9.546	0.002004	0.039797
2	rs440	6765566	CB4856	N2	2.54	9.546	0.002004	0.039797
2	rs441	6765736	CB4856	N2	2.54	9.546	0.002004	0.039797
3	rs624	2255584	N2	CB4856	0.3978	9.524	0.002028	0.039797
2	rs429	5949935	CB4856	N2	2.519	9.487	0.00207	0.039797
2	rs430	5982970	CB4856	N2	2.519	9.487	0.00207	0.039797
2	rs431	6014830	CB4856	N2	2.519	9.487	0.00207	0.039797
2	rs432	6175492	CB4856	N2	2.519	9.487	0.00207	0.039797
2	rs433	6231651	CB4856	N2	2.519	9.487	0.00207	0.039797
2	rs434	6348699	CB4856	N2	2.519	9.487	0.00207	0.039797
2	rs435	6406321	CB4856	N2	2.519	9.487	0.00207	0.039797
2	rs436	6441068	CB4856	N2	2.519	9.487	0.00207	0.0427118
1	rs22	12612098	CB4856	N2	0.375	9.218	0.002397	0.0427118
1	rs23	12654691	CB4856	N2	0.375	9.218	0.002397	0.0427118
1	rs24	12654992	CB4856	N2	0.375	9.218	0.002397	0.0477363
6	rs1298	14739634	N2	CB4856	0.3891	8.885	0.002875	0.0477363
6	rs1299	14740346	N2	CB4856	0.3891	8.885	0.002875	0.0477363
6	rs1300	14791150	N2	CB4856	0.3891	8.885	0.002875	0.0530416
6	rs1413	11342561	N2	CB4856	0.3715	8.342	0.003874	0.0530416
6	rs1414	11346702	N2	CB4856	0.3715	8.342	0.003874	0.0530416
6	rs1415	11433411	N2	CB4856	0.3715	8.342	0.003874	0.0530416
6	rs1416	11452971	N2	CB4856	0.3715	8.342	0.003874	0.0530416
6	rs1293	14542103	N2	CB4856	0.3715	8.342	0.003874	0.0530416
6	rs1294	14547204	N2	CB4856	0.3715	8.342	0.003874	0.0530416
6	rs1295	14600463	N2	CB4856	0.3715	8.342	0.003874	0.0530416
2	rs283	8844580	CB4856	N2	2.344	7.93	0.004862	0.0530416
2	rs297	9917206	CB4856	N2	2.357	7.929	0.004864	0.0530416
2	rs298	10013190	CB4856	N2	2.357	7.929	0.004864	0.0530416
2	rs299	10051366	CB4856	N2	2.357	7.929	0.004864	0.0530416
3	rs623	2164475	N2	CB4856	0.4308	7.918	0.004895	0.0530416
6	rs1307	15196795	N2	CB4856	0.4308	7.918	0.004895	0.0530416
4	rs773	12758850	CB4856	N2	0.4342	7.831	0.005136	0.0530416
4	rs774	12780086	CB4856	N2	0.4342	7.831	0.005136	0.0530416
6	rs1287	6518990	N2	CB4856	0.2216	7.782	0.005278	0.0530416
6	rs1288	6528312	N2	CB4856	0.2216	7.782	0.005278	0.0530416
2	rs421	5235769	CB4856	N2	2.307	7.777	0.005292	0.0530416
2	rs422	5274748	CB4856	N2	2.307	7.777	0.005292	0.0530416
2	rs423	5329500	CB4856	N2	2.307	7.777	0.005292	0.0530416
2	rs424	5351443	CB4856	N2	2.307	7.777	0.005292	0.0530416
2	rs425	5401579	CB4856	N2	2.307	7.777	0.005292	0.0530416
2	rs254	6825752	CB4856	N2	2.307	7.777	0.005292	0.0530416
4	rs764	12290012	CB4856	N2	0.4362	7.774	0.0053	0.0530416
4	rs765	12291283	CB4856	N2	0.4362	7.774	0.0053	0.0530416
4	rs766	12382900	CB4856	N2	0.4362	7.774	0.0053	0.0530416
4	rs879	16579003	CB4856	N2	0.4362	7.774	0.0053	0.0530416
4	rs880	16624541	CB4856	N2	0.4362	7.774	0.0053	0.0530416
4	rs881	16645815	CB4856	N2	0.4362	7.774	0.0053	0.056519
1	rs26	12738895	CB4856	N2	0.4094	7.566	0.005949	0.056519
6	rs1276	5759067	N2	CB4856	0.1519	7.494	0.006189	0.056519
6	rs1277	5819564	N2	CB4856	0.1519	7.494	0.006189	0.056519
6	rs1278	5877800	N2	CB4856	0.1519	7.494	0.006189	0.056519
6	rs1279	5961158	N2	CB4856	0.1519	7.494	0.006189	0.056519
6	rs1280	5963609	N2	CB4856	0.1519	7.494	0.006189	0.056519
6	rs1281	6014350	N2	CB4856	0.1519	7.494	0.006189	0.0578145
6	rs1407	10862511	N2	CB4856	0.4079	6.733	0.009465	0.0578145
6	rs1408	10869240	N2	CB4856	0.4079	6.733	0.009465	0.0578145
6	rs1409	10944577	N2	CB4856	0.4079	6.733	0.009465	0.0578145
6	rs1410	11071492	N2	CB4856	0.4079	6.733	0.009465	0.0578145
6	rs1411	11096460	N2	CB4856	0.4079	6.733	0.009465	0.0578145
6	rs1412	11127957	N2	CB4856	0.4079	6.733	0.009465	0.0578145
6	rs1417	11517222	N2	CB4856	0.4079	6.733	0.009465	0.0578145
6	rs1418	11530495	N2	CB4856	0.4079	6.733	0.009465	0.0578145
6	rs1419	11622417	N2	CB4856	0.4079	6.733	0.009465	0.0578145
5	rs1192	20264925	CB4856	N2	2.244	6.635	0.009999	0.0578145
5	rs1193	20290768	CB4856	N2	2.244	6.635	0.009999	0.0578145
