# Supplementary material for: The whole transcriptome regulation as a function of mitochondrial polymorphisms and aging in Caenorhabditis elegans
Source: Aging (Albany NY). 2020 Feb 4;12(3):2453–70. doi: 10.18632/aging.102754 (PMC7041728; doi:10.18632/aging.102754)
Supplement: Supplementary Table 2 [file aging-12-102754-s006..xlsx]

## Sheet: mRNA
Gene ID	Gene Symbol	Transcripts ID	Transcripts number	Chromosome	Start	End	N2-1 Expression	N2-2 Expression	N2-3 Expression	NC30-1 Expression	NC30-2 Expression	NC30-3 Expression	log2 (CA/CO)	Qvalue (CO-vs-CA)	KEGG Pathway Desc	KEGG Disease Desc	KEGG Module Desc	KEGG Reaction Desc	GO_C Desc	GO_F Desc	GO_P Desc
184458	F14D2.7	NM_062108.2	1	NC_003280.10	3338002	3338656	0	0	0	1	0.81	1.02	6.2374	9.8483e-10
183320	fbxa-176	NM_075044.2	1	NC_003283.11	17549721	17551196	0.55	0.43	0.82	1.73	2.65	2.1	1.83847	2.14859e-22
174607	ZK673.1	NM_001267319.1+++NM_001267320.1	2	NC_003280.10	10443340	10445143	21.18	53.03	27.69	16.06	19.07	18.52	-1.00492	7.1469e-50					GO:0016020///membrane+++GO:0016021///integral component of membrane
175048	Y39G8B.2	NM_064525.4	1	NC_003280.10	13973932	13976208	2	2.61	3.62	6.78	5.86	6.56	1.21413	5.6047e-35	00790///Folate biosynthesis+++01100///Metabolic pathways+++00040///Pentose and glucuronate interconversions+++00561///Glycerolipid metabolism+++00051///Fructose and mannose metabolism+++00052///Galactose metabolism			R01036///Glycerol:NAD+ oxidoreductase Glycerol + NAD+ <=> D-Glyceraldehyde + NADH + H++++R01041///glycerol:NADP+ oxidoreductase Glycerol + NADP+ <=> D-Glyceraldehyde + NADPH + H++++R02577///Propane-1,2-diol:NADP+ 1-oxidoreductase Propane-1,2-diol + NADP+ <=> Lactaldehyde + NADPH + H++++R01759///L-Arabitol:NADP+ 1-oxidoreductase L-Arabitol + NADP+ <=> L-Arabinose + NADPH + H++++R01431///xylitol:NA…		GO:0004032///alditol:NADP+ 1-oxidoreductase activity+++GO:0008106///alcohol dehydrogenase (NADP+) activity+++GO:0016491///oxidoreductase activity	GO:0055114///oxidation-reduction process
13191030	T16G12.10	NM_001268129.1	1	NC_003281.10	10055604	10056133	0	0.07	0	3.7	4.51	5.82	7.63527	2.6693e-43
183775	clec-86	NM_076801.1	1	NC_003284.9	7139901	7140494	7.38	5.32	9.95	17.32	21.56	19.32	1.33542	1.01061e-50						GO:0030246///carbohydrate binding	GO:0045087///innate immune response
174679	gly-1	NM_063944.4	1	NC_003280.10	10900042	10902204	0.06	0.25	0.16	1.13	2.04	1.99	3.46535	2.66677e-50	01100///Metabolic pathways+++00512///Mucin type O-glycan biosynthesis		M00056///O-glycan biosynthesis, mucin type core	R05910///UDP-N-acetyl-D-glucosamine + Tn antigen <=> UDP + G00031+++R05912///UDP-N-acetyl-D-glucosamine + T antigen <=> UDP + G00025	GO:0016020///membrane+++GO:0016021///integral component of membrane	GO:0008375///acetylglucosaminyltransferase activity
6418652	F40G9.15	NM_001129224.1	1	NC_003281.10	181561	182981	0	0	0	0.12	0.17	0.23	4.72838	0.000537944					GO:0016020///membrane+++GO:0016021///integral component of membrane
3896812	clec-181	NM_001038367.2	1	NC_003282.8	8596077	8596943	0	0	0	0.62	0.29	0.21	5.34987	9.53726e-06						GO:0030246///carbohydrate binding
178283	bus-12	NM_001047492.3+++NM_001047493.3	2	NC_003282.8	13256186	13259008	1.66	0.12	2.35	2.88	3.38	2.86	1.136	2.5352e-14					GO:0016021///integral component of membrane+++GO:0016020///membrane	GO:0015165///pyrimidine nucleotide-sugar transmembrane transporter activity	GO:0090481///pyrimidine nucleotide-sugar transmembrane transport+++GO:0034219///carbohydrate transmembrane transport
186004	clec-24	NM_001269800.2+++NM_001269801.2	2	NC_003283.11	16862012	16863890	0.33	0.49	0.54	0.1	0.1	0.14	-1.99759	6.64603e-07					GO:0016021///integral component of membrane+++GO:0016020///membrane	GO:0030246///carbohydrate binding
183995	E02H4.4	NM_077978.3	1	NC_003284.9	14257969	14262435	0.12	0.17	0.18	4.14	4.62	4.09	4.75687	9.08511e-165					GO:0005576///extracellular region
180195	R10E8.6	NM_075171.4	1	NC_003283.11	18259301	18266364	1.41	1.22	1.76	3.25	3.66	3.3	1.21319	2.46994e-98
178203	F53B2.8	NM_069998.4	1	NC_003282.8	12526399	12527219	44.92	23.87	45.91	76.08	70.79	94.47	1.06085	2.97516e-166
180884	nnt-1	NM_076627.3	1	NC_003284.9	6122322	6127450	5.17	1.53	6.09	8.3	8.72	8.74	1.01035	6.37313e-115	00760///Nicotinate and nicotinamide metabolism+++01100///Metabolic pathways	H00256///Familial glucocorticoid deficiency (FGD)		R00112///NADPH:NAD+ oxidoreductase NADPH + NAD+ <=> NADP+ + NADH	GO:0016021///integral component of membrane+++GO:0016020///membrane+++GO:0005739///mitochondrion	GO:0008746///NAD(P)+ transhydrogenase activity+++GO:0050661///NADP binding+++GO:0051287///NAD binding	GO:0006740///NADPH regeneration+++GO:1902600///proton transmembrane transport+++GO:0055114///oxidation-reduction process
188678	srh-70	NM_064272.1	1	NC_003280.10	12516753	12517858	0.57	0.36	0.17	0	0.06	0	-4.25746	2.33504e-09					GO:0016020///membrane+++GO:0016021///integral component of membrane		GO:0050907///detection of chemical stimulus involved in sensory perception
175114	clec-147	NM_064621.3	1	NC_003280.10	14535965	14537559	2.69	4.48	2.67	1.04	1.29	1.37	-1.43149	5.68692e-18						GO:0030246///carbohydrate binding
184342	F11C1.4	NM_077755.2	1	NC_003284.9	12978505	12979772	0.1	0.22	0.26	0.66	0.72	0.67	1.81222	9.53343e-07					GO:0005811///lipid droplet		GO:0019915///lipid storage
190829	Y102A5C.2	NM_074875.3	1	NC_003283.11	16918894	16919547	14.4	13.57	14.06	0.14	0.14	0.13	-6.72248	1.93147e-147
183955	D2062.5	NM_061907.2	1	NC_003280.10	2622780	2623426	8.09	5.92	4.37	2.65	2.95	2.36	-1.26441	5.21279e-10					GO:0016021///integral component of membrane+++GO:0016020///membrane
184865	bgnt-1.2	NM_001313157.1	1	NC_003283.11	2115555	2118644	0	0	0	0.07	0.1	0.11	4.61291	0.000971663	01100///Metabolic pathways+++00515///Mannose type O-glycan biosynthesis	H00120///Muscular dystrophy-dystroglycanopathy type A				GO:0016740///transferase activity
191019	Y116F11B.7	NM_075444.3	1	NC_003283.11	19848583	19855199	6.54	4.52	5.81	2.86	2.92	2.1	-1.11297	4.467e-34
181087	R09F10.1	NM_077007.4	1	NC_003284.9	8323644	8324995	1.82	0.94	1.74	17.02	20.92	15.06	3.54673	0					GO:0005615///extracellular space+++GO:0016021///integral component of membrane+++GO:0016020///membrane+++GO:0005764///lysosome	GO:0008234///cysteine-type peptidase activity+++GO:0016787///hydrolase activity+++GO:0008233///peptidase activity+++GO:0004197///cysteine-type endopeptidase activity	GO:0006508///proteolysis+++GO:0051603///proteolysis involved in cellular protein catabolic process
185574	F40H6.2	NM_065915.2	1	NC_003281.10	6040334	6045076	0.01	0	0	0.04	0.06	0.04	4.11541	0.000114465						GO:0030246///carbohydrate binding
178840	skr-7	NM_071820.5	1	NC_003283.11	4422427	4423011	1.36	1.27	1.11	3.99	3.01	2.03	1.24135	1.87979e-09	04341///Hedgehog signaling pathway - fly+++04114///Oocyte meiosis+++04350///TGF-beta signaling pathway+++04710///Circadian rhythm+++04141///Protein processing in endoplasmic reticulum+++04111///Cell cycle - yeast+++04310///Wnt signaling pathway+++04110///Cell cycle+++04120///Ubiquitin mediated proteolysis		M00379///SCF-MET30 complex+++M00381///SCF-SKP2 complex+++M00411///SCF-GRR1 complex+++M00382///SCF-FBS complex+++M00387///SCF-FBW7 complex+++M00380///SCF-BTRC complex+++M00407///SCF-CDC4 complex			GO:0016874///ligase activity	GO:1902230///negative regulation of intrinsic apoptotic signaling pathway in response to DNA damage+++GO:0006511///ubiquitin-dependent protein catabolic process
3565652	F09C6.12	NM_001028605.1	1	NC_003283.11	16882878	16883142	1.74	0.88	1	0	0	0	-4.87895	0.00020042
173729	skr-15	NM_062261.5	1	NC_003280.10	3824155	3824709	1.39	1.46	1.13	3.19	2.97	3.32	1.2232	3.70697e-09	04710///Circadian rhythm+++04350///TGF-beta signaling pathway+++04111///Cell cycle - yeast+++04141///Protein processing in endoplasmic reticulum+++04341///Hedgehog signaling pathway - fly+++04310///Wnt signaling pathway+++04110///Cell cycle+++04120///Ubiquitin mediated proteolysis+++04114///Oocyte meiosis		M00380///SCF-BTRC complex+++M00407///SCF-CDC4 complex+++M00382///SCF-FBS complex+++M00379///SCF-MET30 complex+++M00411///SCF-GRR1 complex+++M00381///SCF-SKP2 complex+++M00387///SCF-FBW7 complex			GO:0016874///ligase activity	GO:0006511///ubiquitin-dependent protein catabolic process
189824	nhr-287	NM_067709.3	1	NC_003282.8	1617462	1618945	2.94	3	1.61	0.94	1.47	1.12	-1.16013	0.000146697					GO:0005634///nucleus		GO:0006355///regulation of transcription, DNA-templated+++GO:0006351///transcription, DNA-templated
191427	ZK809.1	NM_069799.3	1	NC_003282.8	11642156	11643638	16.06	12.68	16	4.65	4.22	4.57	-1.74123	1.72423e-178						GO:0016791///phosphatase activity+++GO:0004725///protein tyrosine phosphatase activity	GO:0016311///dephosphorylation+++GO:0035335///peptidyl-tyrosine dephosphorylation+++GO:0006470///protein dephosphorylation
180088	gst-22	NM_074694.4	1	NC_003283.11	16231088	16232271	4.55	2.98	7.85	0.63	0.86	0.56	-2.92847	3.70231e-53	00590///Arachidonic acid metabolism+++00983///Drug metabolism - other enzymes+++00980///Metabolism of xenobiotics by cytochrome P450+++01100///Metabolic pathways+++00982///Drug metabolism - cytochrome P450+++00480///Glutathione metabolism	H00516///Cleft lip and/or cleft palate+++H00024///Prostate cancer		R07023///1-nitro-7-hydroxy-8-glutathionyl-7,8-dihydronaphthalene glutathione-lyase (epoxide-forming) 1-Nitronaphthalene-7,8-oxide + Glutathione <=> 1-Nitro-7-hydroxy-8-glutathionyl-7,8-dihydronaphthalene+++R07083///4,5-dihydro-4-hydroxy-5-S-glutathionyl-benzo[a]pyrene glutathione-lyase (epoxide-forming) Benzo[a]pyrene-4,5-oxide + Glutathione <=> 4,5-Dihydro-4-hydroxy-5-S-glutathionyl-benzo[a]pyre…		GO:0016740///transferase activity
181286	K09C8.2	NM_077430.3	1	NC_003284.9	10959577	10960845	0	0	0.12	0.41	0.47	0.39	3.39718	7.88241e-07					GO:0016020///membrane+++GO:0016021///integral component of membrane
182616	C14E2.4	NM_075932.2	1	NC_003284.9	1818865	1821324	0	0	0	0.1	0.23	0.21	5.11541	5.25186e-05					GO:0005783///endoplasmic reticulum	GO:0046872///metal ion binding+++GO:0004656///procollagen-proline 4-dioxygenase activity+++GO:0005506///iron ion binding+++GO:0031418///L-ascorbic acid binding+++GO:0016705///oxidoreductase activity, acting on paired donors, with incorporation or reduction of molecular oxygen+++GO:0016491///oxidoreductase activity	GO:0055114///oxidation-reduction process+++GO:0018401///peptidyl-proline hydroxylation to 4-hydroxy-L-proline
3565839	T23F11.6	NM_001027621.3	1	NC_003281.10	4646539	4647836	0.63	0.94	0.87	1.65	2.1	2.13	1.24554	2.48626e-06						GO:1990817///RNA adenylyltransferase activity
177798	F58G6.7	NM_069313.4	1	NC_003282.8	9654351	9655295	4.26	5.25	8.6	10.7	19.96	9.01	1.08493	4.30034e-25	04978///Mineral absorption				GO:0016021///integral component of membrane	GO:0005375///copper ion transmembrane transporter activity	GO:0035434///copper ion transmembrane transport
182409	C08E8.4	NM_075191.3	1	NC_003283.11	18372102	18373476	4.5	0.96	5.9	10.6	12.75	10.69	1.57009	7.51319e-51							GO:0045087///innate immune response
174545	F26C11.3	NM_001136341.2+++NM_001136342.2+++NM_001136343.2+++NM_001136344.2+++NM_063738.4	5	NC_003280.10	9903059	9915099	0	0.01	0	0.03	0.06	0.08	4.78283	3.18764e-07					GO:0005575///cellular_component+++GO:0005576///extracellular region	GO:0003674///molecular_function
184052	ugt-43	NM_001268558.1+++NM_001268559.1	2	NC_003282.8	10464659	10467240	0.61	0.56	0.83	2.74	3.53	3.6	2.29098	9.43628e-73	00980///Metabolism of xenobiotics by cytochrome P450+++00053///Ascorbate and aldarate metabolism+++00982///Drug metabolism - cytochrome P450+++00040///Pentose and glucuronate interconversions+++00860///Porphyrin and chlorophyll metabolism+++01110///Biosynthesis of secondary metabolites+++00983///Drug metabolism - other enzymes+++00830///Retinol metabolism+++00140///Steroid hormone biosynthesis+++…	H02152///Transient familial neonatal hyperbilirubinemia+++H02054///Crigler-Najjar syndrome+++H01593///Osteoporosis+++H00208///Hyperbilirubinemia+++H02055///Gilbert syndrome	M00129///Ascorbate biosynthesis, animals, glucose-1P => ascorbate+++M00014///Glucuronate pathway (uronate pathway)	R02389///UDPglucuronate beta-D-glucuronosyltransferase(acceptor-unspecific) 2 UDP-glucuronate + Bilirubin <=> 2 UDP + Bilirubin beta-diglucuronide+++R03091///UDPglucuronate beta-D-glucuronosyltransferase(acceptor-unspecific) Estradiol-17beta + UDP-glucuronate <=> Estradiol-17beta 3-glucuronide + UDP+++R02358///UDPglucuronate beta-D-glucuronosyltransferase(acceptor-unspecific) Estrone + UDP-glucur…	GO:0016021///integral component of membrane+++GO:0016020///membrane+++GO:0043231///intracellular membrane-bounded organelle	GO:0008194///UDP-glycosyltransferase activity+++GO:0016758///transferase activity, transferring hexosyl groups+++GO:0016740///transferase activity	GO:0008152///metabolic process
186258	sre-45	BGIR6239_29004+++NM_064442.2	2	NC_003280.10	13517912	13522925	10.99	13.47	10.18	32.97	34.69	31.06	1.43664	6.88485e-31					GO:0016021///integral component of membrane+++GO:0016020///membrane		GO:0007606///sensory perception of chemical stimulus
188815	T23G4.5	NM_070243.1	1	NC_003282.8	13678951	13680333	0.06	0	0.06	1.21	1.32	2.24	5.42026	8.37375e-21
173706	clec-132	NM_062184.1	1	NC_003280.10	3577045	3578110	0	0	0	0.39	0.57	0.37	5.78283	1.98178e-07						GO:0030246///carbohydrate binding
182860	C24H11.2	NM_067127.1	1	NC_003281.10	11790536	11792245	8.09	10.88	15.35	0	1.59	4.71	-2.42703	1.33982e-185						GO:0004721///phosphoprotein phosphatase activity+++GO:0016787///hydrolase activity	GO:0006470///protein dephosphorylation
190919	Y106G6E.1	NM_060288.1	1	NC_003279.8	10198286	10200440	0.34	0.17	0.2	0.71	0.94	0.73	1.72455	4.15458e-09					GO:0005634///nucleus+++GO:0005737///cytoplasm	GO:0004672///protein kinase activity+++GO:0004707///MAP kinase activity+++GO:0005524///ATP binding	GO:0035556///intracellular signal transduction+++GO:0006468///protein phosphorylation+++GO:0000165///MAPK cascade+++GO:0010468///regulation of gene expression+++GO:0071310///cellular response to organic substance
172266	B0207.5	NM_001306457.1+++NM_001306458.1	2	NC_003279.8	5919055	5935348	0.06	0.04	0.04	0.47	0.65	0.94	3.87035	3.69855e-181
183208	C34D4.10	NM_068714.1	1	NC_003282.8	7120005	7121413	12.64	13.56	12.11	35.13	36.88	30.2	1.399	2.82404e-243
190708	fbxa-89	NM_067192.2	1	NC_003281.10	12236184	12238938	0.33	0.32	0.52	0.8	1.09	0.68	1.11758	9.87122e-05
191335	pqn-97	NM_070861.1	1	NC_003283.11	609202	609726	0.14	0	0	0.6	0.55	0.78	3.72838	2.97738e-06					GO:0016020///membrane+++GO:0016021///integral component of membrane
189572	Y32B12C.1	NM_074800.1	1	NC_003283.11	16606619	16607976	0.66	0.99	0.83	0.08	0	0.04	-4.38709	6.88173e-15
173026	pes-2.2	NM_060509.3	1	NC_003279.8	11358167	11359301	0.17	0.18	0.1	1.18	1.27	1.35	3.03917	8.13782e-23
28661661	Y56A3A.41	NM_001330970.1	1	NC_003281.10	11892172	11892972	3.37	2.02	2.92	1.28	1.53	1.11	-1.11542	1.75377e-07						GO:0003676///nucleic acid binding
189664	nhr-235	NM_064301.1	1	NC_003280.10	12640701	12642740	0.24	0.88	0.19	0	0	0.09	-3.77941	1.33692e-06					GO:0005634///nucleus		GO:0006355///regulation of transcription, DNA-templated+++GO:0006351///transcription, DNA-templated
171653	sago-2	NM_058357.3+++NM_182059.3	2	NC_003279.8	618207	621311	9.76	5.87	9.87	16.95	17.39	17.3	1.02613	9.68274e-198						GO:0003676///nucleic acid binding	GO:0031047///gene silencing by RNA
190230	gst-32	NM_064722.2	1	NC_003280.10	15177372	15178585	0.2	0.53	0.15	1.28	1.13	1.51	2.12481	9.0131e-10	00983///Drug metabolism - other enzymes+++00980///Metabolism of xenobiotics by cytochrome P450+++00982///Drug metabolism - cytochrome P450+++00480///Glutathione metabolism	H00516///Cleft lip and/or cleft palate+++H00024///Prostate cancer		R07024///1-nitro-7-glutathionyl-8-hydroxy-7,8-dihydronaphthalene glutathione-lyase (epoxide-forming) 1-Nitronaphthalene-7,8-oxide + Glutathione <=> 1-Nitro-7-glutathionyl-8-hydroxy-7,8-dihydronaphthalene+++R07004///(1S)-hydroxy-(2S)-glutathionyl-1,2-dihydronaphthalene glutathione-lyase (epoxide-forming) (1S,2R)-Naphthalene 1,2-oxide + Glutathione <=> (1S)-Hydroxy-(2S)-glutathionyl-1,2-dihydronaph…		GO:0016740///transferase activity	GO:0000302///response to reactive oxygen species
13217921	Y6G8.15	NM_001269820.1	1	NC_003283.11	17610036	17610596	0	0	0.08	2.28	4.06	3.48	6.99373	2.01278e-29
13184345	C16C8.20	NM_001267147.1	1	NC_003280.10	3446957	3448020	5.6	5.35	4.23	2.66	1.67	2.19	-1.25324	4.37711e-11
182349	fbxa-157	NM_075109.2	1	NC_003283.11	17899828	17901877	1.51	2	2.12	4.34	6.66	4.69	1.46031	5.79567e-43
181237	fip-5	NM_077325.4	1	NC_003284.9	10302742	10303070	66.46	78.11	75.34	23.46	20.07	24.97	-1.75947	4.72939e-85
183169	C33G3.5	NM_077942.2	1	NC_003284.9	14076316	14078674	0	0.02	0	0.8	0.98	1.26	7.32256	6.4414e-36
183007	srx-58	NM_074408.2	1	NC_003283.11	15352574	15353862	0.52	0.03	0.57	1.09	1.09	0.94	1.45421	8.23202e-07					GO:0016020///membrane+++GO:0016021///integral component of membrane
180106	nhr-54	NM_074778.4	1	NC_003283.11	16504029	16505917	0.24	0.45	0.42	1.64	1.35	1.82	2.10371	4.34661e-25					GO:0005634///nucleus	GO:0003700///DNA-binding transcription factor activity+++GO:0043565///sequence-specific DNA binding+++GO:0046872///metal ion binding+++GO:0008270///zinc ion binding+++GO:0003677///DNA binding	GO:0006355///regulation of transcription, DNA-templated
186754	H20E11.2	NM_068650.1	1	NC_003282.8	6827777	6829490	1.9	1.48	3.8	5.82	11.66	4.48	1.59185	1.61824e-63					GO:0045121///membrane raft		GO:0045087///innate immune response
175263	Y34F4.4	NM_064915.5	1	NC_003281.10	1023283	1024544	1.14	0.62	1.29	2.4	2.72	1.91	1.18742	1.80392e-09					GO:0016021///integral component of membrane+++GO:0016020///membrane
173799	clec-136	NM_062412.5	1	NC_003280.10	4615677	4616533	0	0	0	0.91	1.67	1.57	7.53574	6.40053e-21						GO:0030246///carbohydrate binding
173660	ins-31	NM_062053.1	1	NC_003280.10	3127041	3127790	0	0.05	0	6.9	8.58	10.47	9.09672	9.33556e-101					GO:0005576///extracellular region	GO:0005179///hormone activity	GO:0010469///regulation of signaling receptor activity
173024	oac-34	NM_060507.2	1	NC_003279.8	11342196	11347288	0.14	0	0.14	0.49	0.45	0.35	2.18175	1.80671e-11					GO:0016020///membrane+++GO:0016021///integral component of membrane	GO:0016747///transferase activity, transferring acyl groups other than amino-acyl groups+++GO:0016746///transferase activity, transferring acyl groups+++GO:0016740///transferase activity	GO:0033692///cellular polysaccharide biosynthetic process
186432	F57A8.7	NM_073185.1	1	NC_003283.11	10075749	10077804	0.06	0.28	0.19	0.4	0.5	0.37	1.26498	0.000129897	04142///Lysosome	H00810///Progressive myoclonic epilepsy (PME/ EPM)+++H00149///Neuronal ceroid lipofuscinosis (NCL)			GO:0016021///integral component of membrane+++GO:0016020///membrane		GO:0055085///transmembrane transport
177917	R09E10.8	NM_069491.4	1	NC_003282.8	10310131	10310413	0	0	0	0.45	0.48	2.44	5.02794	9.35267e-05
173705	clec-130	NM_062182.1	1	NC_003280.10	3573556	3574652	0	0	0	1.12	1.97	2.47	7.8093	1.64701e-24						GO:0030246///carbohydrate binding
178691	F36F12.1	NM_001313169.1+++NM_071170.3	2	NC_003283.11	2100110	2103207	0.16	0	0.37	2.31	1.52	2.44	5.48738	4.2358e-84					GO:0016021///integral component of membrane+++GO:0016020///membrane
184491	F14H3.5	NM_074638.5	1	NC_003283.11	16056086	16057037	0.95	2.53	1.81	4.84	5.5	4.8	1.4885	2.34735e-23
173555	C52E2.4	NM_061691.3	1	NC_003280.10	1843589	1846183	0.9	0.76	1.35	2.33	3.55	2.36	1.44298	3.18259e-40
175688	C45G9.10	NM_171113.3+++NM_171114.3	2	NC_003281.10	5056881	5061881	0.07	0.01	0.02	0.16	0.11	0.17	2.15348	1.38973e-06
3564900	W02D7.12	NM_001029010.1	1	NC_003283.11	8311521	8312019	0.09	0	0	0.67	0.71	0.72	4.48738	5.95402e-06
180162	fat-5	NM_075081.4	1	NC_003283.11	17725005	17726717	22.87	14.35	29.97	8.51	9.27	9.85	-1.28816	1.74654e-129	01040///Biosynthesis of unsaturated fatty acids+++04152///AMPK signaling pathway+++04212///Longevity regulating pathway - worm+++01212///Fatty acid metabolism+++03320///PPAR signaling pathway			R02222///steroyl-CoA,hydrogen-donor:oxygen oxidoreductase Stearoyl-CoA + 2 Ferrocytochrome b5 + Oxygen + 2 H+ <=> Oleoyl-CoA + 2 Ferricytochrome b5 + 2 H2O	GO:0016021///integral component of membrane+++GO:0016020///membrane+++GO:0005789///endoplasmic reticulum membrane	GO:0004768///stearoyl-CoA 9-desaturase activity+++GO:0005506///iron ion binding+++GO:0016491///oxidoreductase activity+++GO:0016717///oxidoreductase activity, acting on paired donors, with oxidation of a pair of donors resulting in the reduction of molecular oxygen to two molecules of water	GO:0055114///oxidation-reduction process+++GO:0006629///lipid metabolic process+++GO:0007275///multicellular organism development+++GO:0006636///unsaturated fatty acid biosynthetic process+++GO:0006633///fatty acid biosynthetic process+++GO:0006631///fatty acid metabolic process+++GO:0042759///long-chain fatty acid biosynthetic process
177447	C17H12.8	NM_068647.3	1	NC_003282.8	6818725	6820547	54.56	25.9	75.07	101.95	123.76	105.79	1.08362	0					GO:0045121///membrane raft		GO:0045087///innate immune response
190538	Y69A2AR.12	NM_067823.2	1	NC_003282.8	2568614	2572031	1.08	1.81	1.06	0.14	0.22	0.31	-2.5664	3.03982e-33					GO:0016021///integral component of membrane+++GO:0016020///membrane
188546	trpl-5	NM_061776.4	1	NC_003280.10	2086911	2090618	0.16	0.14	0.06	0.26	0.37	0.32	1.37844	0.000344101					GO:0016020///membrane+++GO:0016021///integral component of membrane
182674	C16C8.7	NM_062150.1	1	NC_003280.10	3459619	3460314	0	0	0	1.29	1.05	1.59	7.17769	5.63764e-17
180330	clec-261	NM_075512.1	1	NC_003283.11	20289939	20294488	0	0	0	0.95	1.76	1.87	7.68616	7.9559e-23						GO:0030246///carbohydrate binding
4363080	K11H12.11	NM_001047510.3	1	NC_003282.8	668962	670365	0.42	0.16	0.29	0.57	0.84	0.68	1.25034	3.88152e-05					GO:0045121///membrane raft		GO:0045087///innate immune response
187016	K04H8.3	NM_061090.1	1	NC_003279.8	14255684	14256970	0.41	0.45	0.33	1.14	1.29	1.27	1.61291	3.91275e-07
178721	F56A4.2	NM_071275.1	1	NC_003283.11	2459637	2460893	38.66	113.42	42.39	364.1	338.23	431.55	2.52431	0						GO:0030246///carbohydrate binding	GO:0045087///innate immune response
191371	ZK637.15	NM_066572.2	1	NC_003281.10	8920110	8921159	2.45	1.83	3.15	5.09	4.65	5.62	1.03963	1.37607e-15
184104	F02H6.6	NM_070330.1	1	NC_003282.8	14229336	14230899	0.03	0	0	0.37	0.57	0.29	5.19787	1.83698e-09
191332	pqn-98	NM_070858.1	1	NC_003283.11	603665	604205	0	0.14	0	0.51	0.39	0.35	3.11541	0.000564723					GO:0016020///membrane+++GO:0016021///integral component of membrane
180104	F26D2.10	NM_074751.2	1	NC_003283.11	16424854	16429449	7.34	4.81	7.58	0.69	0.41	0.45	-3.66954	0					GO:0016021///integral component of membrane+++GO:0016020///membrane
186880	grd-11	NM_075522.2	1	NC_003283.11	20356917	20365718	0.61	0.03	0.6	0.67	0.91	1.01	1.06917	8.65019e-13						GO:0008233///peptidase activity	GO:0006508///proteolysis+++GO:0016539///intein-mediated protein splicing
184922	F25D1.5	NM_073303.4	1	NC_003283.11	10545829	10546752	3.65	6.16	3.38	1.85	2.01	2.02	-1.18679	4.42615e-19						GO:0000166///nucleotide binding+++GO:0016491///oxidoreductase activity	GO:0055114///oxidation-reduction process
188182	fbxa-199	NM_074426.3	1	NC_003283.11	15397385	15398828	0.04	0.11	0.11	0.26	0.39	0.43	2.07857	0.000310185					GO:0016020///membrane+++GO:0016021///integral component of membrane
183271	C36C5.15	NM_071472.1	1	NC_003283.11	3167968	3168750	0.26	0.35	0.52	0.96	1.67	1.16	1.71826	4.13895e-07					GO:0005576///extracellular region
185192	abhd-11.1	NM_060541.1	1	NC_003279.8	11515127	11517108	0	0	0	0.23	0.31	1.22	6.78283	1.88238e-13		H01439///Williams-Beuren syndrome			GO:0005739///mitochondrion	GO:0016787///hydrolase activity
178688	clec-207	NM_071167.4	1	NC_003283.11	2096082	2097228	0	0	0.05	6.17	8.7	11.91	9.18539	6.89436e-106						GO:0030246///carbohydrate binding
175483	F34D10.3	NM_065356.4	1	NC_003281.10	3734293	3734846	1.26	1.5	1.04	2.12	4.13	2.15	1.08566	2.25731e-05					GO:0016020///membrane+++GO:0016021///integral component of membrane
190077	Y49F6A.5	NM_062193.1	1	NC_003280.10	3607937	3609861	0.31	0.37	0.07	0.52	0.69	0.66	1.29803	1.14713e-05
176463	enu-3.1	NM_066901.4	1	NC_003281.10	10436772	10437558	7.52	5.36	5.48	2.85	2.93	3.12	-1.06712	1.21464e-15					GO:0043025///neuronal cell body+++GO:0016021///integral component of membrane+++GO:0016020///membrane		GO:0048846///axon extension involved in axon guidance+++GO:0048675///axon extension
188922	clec-103	NM_060809.2	1	NC_003279.8	12683238	12684338	0.04	0	0.04	2.06	2.06	3.06	6.39427	1.34799e-39						GO:0030246///carbohydrate binding
191040	fbxa-63	NM_064953.1	1	NC_003281.10	1243531	1245283	0.85	0.71	1.03	1.85	2.33	1.53	1.1216	7.16704e-09
179628	sodh-2	NM_073591.3	1	NC_003283.11	11889719	11891186	0.24	0.03	0.14	0.36	0.49	0.61	1.84897	4.71867e-06	01120///Microbial metabolism in diverse environments+++00625///Chloroalkane and chloroalkene degradation+++01220///Degradation of aromatic compounds+++00350///Tyrosine metabolism+++00980///Metabolism of xenobiotics by cytochrome P450+++00010///Glycolysis / Gluconeogenesis+++01110///Biosynthesis of secondary metabolites+++00982///Drug metabolism - cytochrome P450+++00071///Fatty acid degradation++…			R06917///1-hydroxymethylnaphthalene:NAD+ oxidoreductase 1-Hydroxymethylnaphthalene + NAD+ <=> 1-Naphthaldehyde + NADH + H++++R00623///primary_alcohol:NAD+ oxidoreductase Primary alcohol + NAD+ <=> Aldehyde + NADH + H++++R05233///trans-3-Chloro-2-propene-1-ol:NAD+ oxidoreductase trans-3-Chloro-2-propene-1-ol + NAD+ <=> trans-3-Chloroallyl aldehyde + NADH + H++++R08281///alcophosphamide:NAD+ oxidor…	GO:0005737///cytoplasm	GO:0004022///alcohol dehydrogenase (NAD) activity+++GO:0008270///zinc ion binding+++GO:0046872///metal ion binding+++GO:0016491///oxidoreductase activity	GO:0006116///NADH oxidation+++GO:0006067///ethanol metabolic process+++GO:0055114///oxidation-reduction process
189047	T28F2.1	NM_058791.2	1	NC_003279.8	3639648	3641347	0.21	0.18	0.22	0.77	0.71	0.48	1.65413	8.60024e-07					GO:0016021///integral component of membrane+++GO:0016020///membrane	GO:0008107///galactoside 2-alpha-L-fucosyltransferase activity	GO:0036065///fucosylation+++GO:0005975///carbohydrate metabolic process+++GO:0043413///macromolecule glycosylation
190993	nep-24	NM_070604.3	1	NC_003282.8	16924392	16926779	0.39	0.2	0.37	1.15	1.48	1.01	1.89811	7.59918e-23						GO:0004222///metalloendopeptidase activity+++GO:0008237///metallopeptidase activity	GO:0006508///proteolysis
183966	D2096.5	NM_069016.2	1	NC_003282.8	8359165	8359716	0	0.08	0	0.81	2	0.59	5.2374	1.0431e-09
187208	K09D9.1	NM_071721.4	1	NC_003283.11	4025104	4026141	1.92	0.94	2.03	3.42	3.38	4	1.13661	1.61103e-15							GO:0045087///innate immune response
176659	Y75B8A.32	NM_067204.4	1	NC_003281.10	12355081	12358526	0.86	0.92	0.67	0.32	0.24	0.16	-1.77941	1.68755e-11
173697	clec-125	NM_062165.3	1	NC_003280.10	3516008	3518853	0.21	0.22	0.17	1.11	1.48	2	2.93065	3.73966e-57						GO:0030246///carbohydrate binding
178087	lys-6	NM_069793.6	1	NC_003282.8	11626962	11627935	5.77	1.18	7.37	14.74	20.27	15.46	1.80286	1.57702e-93						GO:0003796///lysozyme activity	GO:0009253///peptidoglycan catabolic process+++GO:0016998///cell wall macromolecule catabolic process
183396	clec-3	NM_062025.2	1	NC_003280.10	3017526	3019787	1.91	0.65	2.51	3	4.63	5.45	1.3666	2.01389e-35						GO:0030246///carbohydrate binding
176894	K11H12.4	NM_067568.3	1	NC_003282.8	674094	675873	5.84	5.73	5.99	15.71	18.17	25.88	1.76379	6.18792e-229					GO:0045121///membrane raft		GO:0045087///innate immune response
182907	C25F9.8	NM_075373.3	1	NC_003283.11	19395055	19396478	0	0	0.06	0.09	0.21	0.28	3.34987	9.97818e-05
177910	nspd-7	NM_069481.4	1	NC_003282.8	10268975	10269187	107.64	132.03	83.28	24.71	19.95	38.22	-2.03114	2.62726e-137
180150	F47H4.2	NM_001136426.2+++NM_074995.5	2	NC_003283.11	17353373	17360120	0.93	0.49	1.36	0.01	0.05	0.02	-5.0829	4.49706e-72
188597	srh-112	NM_074962.1	1	NC_003283.11	17225086	17226219	0	0	0	0.17	0.12	0.14	4.93483	0.000167117					GO:0016020///membrane+++GO:0016021///integral component of membrane		GO:0050907///detection of chemical stimulus involved in sensory perception
183958	oac-12	NM_071795.1	1	NC_003283.11	4329039	4332550	0.15	0.07	0.13	1.72	1.56	1.98	3.91936	6.18355e-78					GO:0016020///membrane+++GO:0016021///integral component of membrane	GO:0016746///transferase activity, transferring acyl groups+++GO:0016740///transferase activity+++GO:0016747///transferase activity, transferring acyl groups other than amino-acyl groups	GO:0033692///cellular polysaccharide biosynthetic process
188018	srh-269	NM_074797.1	1	NC_003283.11	16590101	16592042	0	0	0	0.03	0.44	0.38	5.8353	1.15358e-07					GO:0016020///membrane+++GO:0016021///integral component of membrane		GO:0050907///detection of chemical stimulus involved in sensory perception
189945	clec-71	NM_068039.2	1	NC_003282.8	3937464	3939924	0.12	0.06	0.26	0.52	0.4	0.52	1.73844	2.69585e-07						GO:0030246///carbohydrate binding	GO:0045087///innate immune response+++GO:0050830///defense response to Gram-positive bacterium
180086	glc-1	NM_074689.5	1	NC_003283.11	16219710	16221830	4.34	3.43	4.53	0.63	0.89	0.67	-2.50438	6.08228e-85					GO:0005886///plasma membrane+++GO:0016021///integral component of membrane+++GO:0030054///cell junction+++GO:0045211///postsynaptic membrane+++GO:0045202///synapse+++GO:0043005///neuron projection+++GO:0016020///membrane+++GO:0005887///integral component of plasma membrane	GO:0016595///glutamate binding+++GO:0008068///extracellularly glutamate-gated chloride channel activity+++GO:0004888///transmembrane signaling receptor activity+++GO:0005254///chloride channel activity+++GO:0005216///ion channel activity+++GO:0042802///identical protein binding+++GO:0005230///extracellular ligand-gated ion channel activity	GO:0007165///signal transduction+++GO:0034220///ion transmembrane transport+++GO:0006811///ion transport+++GO:0050877///nervous system process+++GO:0007268///chemical synaptic transmission+++GO:1902476///chloride transmembrane transport+++GO:0060079///excitatory postsynaptic potential+++GO:0031987///locomotion involved in locomotory behavior+++GO:0042391///regulation of membrane potential+++GO:00…
3565698	T13F3.8	NM_001028967.1	1	NC_003283.11	16271640	16272498	0.78	0.66	0.4	0.1	0.26	0.24	-1.63502	0.000532503					GO:0016021///integral component of membrane+++GO:0016020///membrane
183677	tag-329	NM_073057.4	1	NC_003283.11	9534944	9536358	0	0.1	0.03	1.21	1.55	2.25	5.32073	4.68676e-47					GO:0005764///lysosome+++GO:0005615///extracellular space	GO:0004197///cysteine-type endopeptidase activity+++GO:0008234///cysteine-type peptidase activity	GO:0051603///proteolysis involved in cellular protein catabolic process+++GO:0006508///proteolysis
13195842	Y73B6BL.288	NM_001268353.1	1	NC_003282.8	6341530	6342231	1.07	2.13	1.43	0.63	0.81	0.39	-1.4009	2.15251e-05
182658	math-14	NM_001267114.1+++NM_001267115.1	2	NC_003280.10	1869423	1870690	0.69	0.71	0.92	2.52	2.39	1.82	1.51605	1.9871e-16
182381	C07G3.8	NM_001269096.2+++NM_001322525.1	2	NC_003283.11	3498122	3501763	0.55	0.58	0.61	0	0.2	0.35	-1.6725	0.000351346
184596	F16H6.9	NM_075163.1	1	NC_003283.11	18217084	18222299	0.44	0.23	0.47	1.13	1.09	1.23	1.5872	1.43723e-20
190474	Y64G10A.2	NM_070332.2	1	NC_003282.8	14242847	14244416	0	0	0	0.06	0.25	0.45	4.72838	0.000537944
187242	K09H9.7	BGIR6239_28739+++NM_058709.4	2	NC_003279.8	3150778	3152097	17.71	17.42	15.84	6.87	7.44	6.53	-1.32627	8.55402e-49						GO:0003676///nucleic acid binding
190648	Y73B6BL.12	NM_068560.2	1	NC_003282.8	6317047	6317457	1.58	1	1.51	2.64	2.89	2.9	1.01251	0.000146621	04141///Protein processing in endoplasmic reticulum				GO:0005623///cell	GO:0015035///protein disulfide oxidoreductase activity	GO:0055114///oxidation-reduction process+++GO:0006662///glycerol ether metabolic process+++GO:0045454///cell redox homeostasis
182977	C28C12.3	NM_069048.1	1	NC_003282.8	8490221	8490857	0.32	0.26	0.11	3.52	4.74	6.38	4.3719	3.34698e-59
173667	C17F4.3	NM_062085.3	1	NC_003280.10	3240548	3241672	0.46	0	0.47	0.76	0.87	0.88	1.42026	4.05748e-05
187890	ttr-29	NM_073826.5	1	NC_003283.11	12906183	12906731	6.11	10.59	7.14	4.2	3.93	3.43	-1.09057	2.51051e-14					GO:0005615///extracellular space
173597	ceh-86	NM_061873.5	1	NC_003280.10	2426487	2429925	0.07	0.1	0.05	0.32	0.23	0.12	1.61291	2.94437e-05					GO:0005634///nucleus	GO:0003677///DNA binding
190484	Y65B4A.4	NM_058358.1	1	NC_003279.8	621708	622187	0.3	0.38	0.91	2.09	1.44	0.97	1.45421	0.000646028					GO:0030864///cortical actin cytoskeleton	GO:0003779///actin binding+++GO:0008179///adenylate cyclase binding	GO:0007010///cytoskeleton organization+++GO:0007163///establishment or maintenance of cell polarity+++GO:0045761///regulation of adenylate cyclase activity+++GO:0000902///cell morphogenesis+++GO:0008154///actin polymerization or depolymerization
4363083	Y37H2A.12	NM_001269856.1+++NM_001269857.1+++NM_001269858.1	3	NC_003283.11	18129290	18131109	17.58	18.86	17.06	7.15	6.5	4.55	-1.57663	7.16171e-78
176355	F58A4.1	NM_066722.3	1	NC_003281.10	9598475	9600009	0.43	0.34	0.32	0.81	1.85	2.78	2.30805	4.20439e-18
184492	fbxa-100	NM_074640.2	1	NC_003283.11	16060526	16062093	0.03	0	0.03	0.62	0.76	0.59	5.15723	2.23198e-17
178572	lipl-3	NM_070832.3	1	NC_003283.11	521812	524213	1.12	0.93	0.94	2.62	3.13	2.59	1.4691	4.94045e-25	04142///Lysosome+++00100///Steroid biosynthesis+++04979///Cholesterol metabolism	H00148///Lysosomal acid lipase deficiency		R01462///cholesterol ester acylhydrolase Cholesterol ester + H2O <=> Cholesterol + Fatty acid	GO:0005764///lysosome	GO:0016298///lipase activity+++GO:0016788///hydrolase activity, acting on ester bonds+++GO:0016787///hydrolase activity	GO:0044255///cellular lipid metabolic process+++GO:0006629///lipid metabolic process+++GO:0016042///lipid catabolic process
180709	F14H12.3	NM_076344.3	1	NC_003284.9	4344288	4345578	24.46	54.18	26.51	14.54	16.41	13.66	-1.26565	2.44565e-147
189447	Y17D7B.3	NM_075269.1	1	NC_003283.11	18784954	18786788	0.27	0.11	0.08	0.43	0.33	0.68	1.65243	0.000504134
185654	F42A9.6	NM_001268384.1+++NM_001268385.2+++NM_001268386.1	3	NC_003282.8	8609253	8611434	27.42	26.9	29.74	8.47	11.83	8.87	-1.56472	1.93898e-97					GO:0016020///membrane+++GO:0016021///integral component of membrane
186225	F54C9.7	NM_063412.1	1	NC_003280.10	8573355	8574996	0.14	0.08	0.34	0.37	0.68	0.49	1.4609	0.000110305					GO:0016021///integral component of membrane+++GO:0016020///membrane		GO:0010883///regulation of lipid storage+++GO:0090087///regulation of peptide transport+++GO:2000192///negative regulation of fatty acid transport
177277	R13H9.6	NM_068315.3	1	NC_003282.8	5067364	5068602	26.19	25.88	27.32	9.6	6.61	8.81	-1.67234	5.38708e-262		H00063///Spinocerebellar ataxia (SCA)			GO:0005737///cytoplasm+++GO:0005634///nucleus	GO:0004672///protein kinase activity+++GO:0005524///ATP binding	GO:0018105///peptidyl-serine phosphorylation+++GO:0018107///peptidyl-threonine phosphorylation+++GO:0006468///protein phosphorylation
259682	Y60A3A.24	NM_001029103.3	1	NC_003283.11	19978987	19981876	4.17	3.24	5.06	1.92	1.75	1.51	-1.27801	4.24213e-30
177278	rmd-6	NM_068316.3	1	NC_003282.8	5068880	5069755	53.09	51.12	45.43	16.58	14.64	20.7	-1.5419	1.07238e-239
171729	Y71G12B.18	NM_001306513.1+++NM_058475.4	2	NC_003279.8	1652916	1655333	0.69	0	1.3	6.65	10.08	8.08	3.6934	2.76787e-155
260019	Y37F4.3	NM_170920.1	1	NC_003279.8	10850433	10851233	0	0	0.14	0.42	0.76	0.78	3.8353	0.00068056
189146	oac-51	NM_001307374.1+++NM_001307375.1+++NM_068143.3	3	NC_003282.8	4336834	4341264	0.16	0.23	0.04	0.56	0.69	0.58	1.92485	8.33035e-12					GO:0016020///membrane+++GO:0016021///integral component of membrane	GO:0016740///transferase activity+++GO:0016746///transferase activity, transferring acyl groups+++GO:0016747///transferase activity, transferring acyl groups other than amino-acyl groups	GO:0033692///cellular polysaccharide biosynthetic process
178520	C49C3.11	NM_070688.3	1	NC_003282.8	17343807	17344759	0.88	0.41	0.55	6.09	7.34	9.49	3.62921	4.97388e-106
173475	fbxc-36	NM_001318299.1+++NM_001318300.1	2	NC_003280.10	941117	943108	0.22	0.74	0.35	0.88	1.37	0.94	1.19395	1.35979e-05
191194	ZC513.2	NM_001322577.1	1	NC_003283.11	8054621	8057553	2.09	0.13	3.51	3.67	4.81	3.63	1.07798	1.50998e-30	04064///NF-kappa B signaling pathway+++04620///Toll-like receptor signaling pathway					GO:0008289///lipid binding
184806	F22B3.5	NM_001268620.2+++NM_001268621.2	2	NC_003282.8	11415598	11416561	0	0	0	0.54	0.5	0.4	5.78283	1.98178e-07					GO:0016020///membrane+++GO:0016021///integral component of membrane
179044	hpo-26	NM_072259.5	1	NC_003283.11	6532088	6533053	12.86	23.94	16.63	10.69	7.27	8.41	-1.05042	4.41249e-36
181397	F19H6.5	NM_077675.3	1	NC_003284.9	12363715	12364757	0	0	0	0.1	0.44	0.45	5.27587	1.6801e-05
191960	srp-8	NM_001322578.1	1	NC_003283.11	8183730	8185772	0.33	0.32	0.82	0.98	1.72	1	1.31971	2.9764e-09		H00605///Deafness, autosomal recessive			GO:0005615///extracellular space	GO:0004867///serine-type endopeptidase inhibitor activity+++GO:0008233///peptidase activity	GO:0010951///negative regulation of endopeptidase activity+++GO:0006508///proteolysis
191129	ZC262.1	NM_066437.2	1	NC_003281.10	8340797	8341743	3.85	3.25	2.4	1.87	1.58	1.05	-1.13272	1.06664e-05					GO:0005856///cytoskeleton
13182087	F36D1.23	NM_001264679.1	1	NC_003279.8	11272536	11273419	0	0	0	0.47	1.17	0.29	4.61291	0.000971663
3565552	B0462.4	NM_001026181.3	1	NC_003283.11	18329112	18331177	1.2	1.05	0.56	3.27	2.75	1.71	1.39568	4.38643e-06
184916	F25B3.5	NM_001269193.1+++NM_001269194.1	2	NC_003283.11	9569061	9570291	2.74	2.36	2.35	4.59	5.44	4.97	1.02794	1.47862e-16
184044	clec-141	NM_062619.1	1	NC_003280.10	5405819	5407626	0	0	0	0.26	0.71	0.47	6.48738	2.7238e-11
182037	dod-20	NM_070795.2	1	NC_003283.11	422498	424064	0.07	0.02	0.1	0.33	0.23	0.44	2.34987	3.54549e-06					GO:0045121///membrane raft		GO:0045087///innate immune response
190953	Y111B2A.21	NM_067254.2	1	NC_003281.10	12746828	12747608	4.89	2.86	3.31	1.69	2.17	1.67	-1.04023	4.31313e-06
6418735	F28B1.9	NM_001129463.1	1	NC_003283.11	17061889	17063095	0	0	0.03	0.3	0.48	0.6	5.70037	4.35895e-13
187088	try-5	NM_073020.3	1	NC_003283.11	9347061	9348651	0.12	0.29	0.18	0.48	0.97	0.84	1.95394	8.93825e-09						GO:0008233///peptidase activity+++GO:0004252///serine-type endopeptidase activity	GO:0006508///proteolysis
173111	clec-17	NM_060751.5	1	NC_003279.8	12430058	12431452	0.44	0.22	0.45	1.12	1.37	1.15	1.69697	2.2526e-14						GO:0030246///carbohydrate binding
186926	nas-19	NM_073492.2	1	NC_003283.11	11401195	11402689	0	0.02	0	0.1	0.28	0.26	4.72838	5.70549e-07					GO:0005576///extracellular region	GO:0008233///peptidase activity+++GO:0008237///metallopeptidase activity+++GO:0046872///metal ion binding+++GO:0016787///hydrolase activity+++GO:0008270///zinc ion binding+++GO:0004222///metalloendopeptidase activity	GO:0018996///molting cycle, collagen and cuticulin-based cuticle+++GO:0006508///proteolysis
177180	scrm-5	NM_068099.4	1	NC_003282.8	4162522	4164423	32.03	28.67	31.84	10.8	9.13	11.73	-1.55724	2.2551e-213					GO:0016020///membrane	GO:0017128///phospholipid scramblase activity+++GO:0005515///protein binding	GO:0017121///phospholipid scrambling
28661643	C49G7.7	NM_001330824.1	1	NC_003283.11	4034559	4035957	0.16	0.03	0.13	1.57	1.57	1.26	3.77211	4.519e-28
180283	dyf-19	NM_075403.3	1	NC_003283.11	19625062	19630624	0.17	0.3	0.31	0.05	0.11	0.12	-1.49562	0.000344154					GO:0036064///ciliary basal body+++GO:0097539///ciliary transition fiber		GO:0090162///establishment of epithelial cell polarity+++GO:1905515///non-motile cilium assembly+++GO:0060271///cilium assembly
187759	dpr-1	NM_074056.3	1	NC_003283.11	13940196	13942182	0	0	0.03	0.22	0.17	0.16	4.34987	1.93248e-05					GO:0005634///nucleus	GO:0003700///DNA-binding transcription factor activity+++GO:0008270///zinc ion binding+++GO:0003677///DNA binding+++GO:0046872///metal ion binding+++GO:0043565///sequence-specific DNA binding	GO:0006355///regulation of transcription, DNA-templated
189275	oac-54	NM_063552.3	1	NC_003280.10	9158136	9159874	1.12	3.97	1.75	0.61	0.71	0.55	-1.89004	2.75537e-35					GO:0016021///integral component of membrane+++GO:0016020///membrane	GO:0016746///transferase activity, transferring acyl groups+++GO:0016747///transferase activity, transferring acyl groups other than amino-acyl groups+++GO:0016740///transferase activity	GO:1900038///negative regulation of cellular response to hypoxia+++GO:0001666///response to hypoxia
178722	C01B4.7	NM_001316779.1+++NM_001316780.1+++NM_071282.1	3	NC_003283.11	2494235	2499001	5.81	3.41	5.39	16.64	14.52	15.94	1.75308	1.90937e-193					GO:0016021///integral component of membrane+++GO:0016020///membrane	GO:0022857///transmembrane transporter activity	GO:0055085///transmembrane transport
187898	nac-2	NM_001268047.1+++NM_001268048.1	2	NC_003281.10	9038826	9043149	2.72	1.38	4.01	6.38	6.1	5.75	1.18424	1.38103e-57		H00606///Early infantile epileptic encephalopathy			GO:0016020///membrane+++GO:0016021///integral component of membrane	GO:0005215///transporter activity+++GO:0015137///citrate transmembrane transporter activity+++GO:0015293///symporter activity+++GO:0015141///succinate transmembrane transporter activity	GO:0008340///determination of adult lifespan+++GO:0015744///succinate transport+++GO:0006811///ion transport+++GO:0055085///transmembrane transport+++GO:0015746///citrate transport+++GO:0006629///lipid metabolic process+++GO:0071422///succinate transmembrane transport+++GO:0040018///positive regulation of multicellular organism growth+++GO:0006814///sodium ion transport
190369	haf-8	NM_070375.1	1	NC_003282.8	14694032	14699940	0	0	0	0.06	0.15	0.06	5.19787	2.9628e-05	04142///Lysosome+++02010///ABC transporters				GO:0016021///integral component of membrane	GO:0016887///ATPase activity+++GO:0005524///ATP binding+++GO:0000166///nucleotide binding+++GO:0042626///ATPase activity, coupled to transmembrane movement of substances	GO:0055085///transmembrane transport
182402	fbxa-158	NM_001047268.1+++NM_001047269.1	2	NC_003280.10	1619894	1621261	0.11	0.21	0.24	0.61	0.52	0.59	1.67704	9.68628e-07
182635	hrg-7	NM_001269519.1+++NM_001269520.1	2	NC_003283.11	12742070	12744107	34.95	16.49	46.1	71.06	77.77	85.82	1.2554	0						GO:0004190///aspartic-type endopeptidase activity+++GO:0008233///peptidase activity+++GO:0016787///hydrolase activity	GO:0030163///protein catabolic process+++GO:0006508///proteolysis
187278	K10G4.3	BGIR6239_29865+++NM_074973.1	2	NC_003283.11	17262802	17264953	0.98	0.7	0.53	0.11	0	0.1	-3.39832	6.54745e-09
189907	tyr-5	NM_058730.2	1	NC_003279.8	3259871	3264110	0.4	0.51	0.37	0.94	0.89	1.16	1.21924	7.3231e-09	01100///Metabolic pathways+++00950///Isoquinoline alkaloid biosynthesis+++00965///Betalain biosynthesis+++01110///Biosynthesis of secondary metabolites+++04916///Melanogenesis+++00350///Tyrosine metabolism	H00168///Oculocutaneous albinism (OCA)	M00042///Catecholamine biosynthesis, tyrosine => dopamine => noradrenaline => adrenaline	R02363///Hydroquinone:oxygen oxidoreductase 2 Hydroquinone + Oxygen <=> 2 p-Benzoquinone + 2 H2O+++R02383///Monophenol,L-dopa:oxygen oxidoreductase Tyramine + Oxygen + NADH + H+ <=> Dopamine + NAD+ + H2O+++R04693///Monophenol,L-dopa:oxygen oxidoreductase (S)-N-Methylcoclaurine + Oxygen + Reduced acceptor <=> 3'-Hydroxy-N-methyl-(S)-coclaurine + H2O + Acceptor+++R02078///L-Tyrosine,L-dopa:oxygen o…		GO:0046872///metal ion binding+++GO:0016491///oxidoreductase activity	GO:0055114///oxidation-reduction process
189440	math-44	NM_061743.4	1	NC_003280.10	1987285	1990324	0.49	0.47	0.59	0.19	0.31	0.14	-1.29398	3.60547e-05
189701	Y38H6C.21	NM_075563.2	1	NC_003283.11	20554116	20554289	1.58	0	4.33	5.47	12.14	7.31	2.02794	1.86541e-07					GO:0016020///membrane+++GO:0016021///integral component of membrane
191125	ZC239.15	NM_062080.2	1	NC_003280.10	3223545	3224643	0.39	0.55	0.84	1.21	1.55	1.5	1.24025	4.94429e-06							GO:0051260///protein homooligomerization
191311	ZK402.1	NM_075863.1	1	NC_003284.9	1404271	1406101	0	0.15	0	0.79	0.53	0.5	3.56949	4.03914e-10					GO:0016021///integral component of membrane+++GO:0016020///membrane
188139	T05F1.9	NM_060161.1	1	NC_003279.8	9645699	9647605	0.36	0.59	0.85	1.4	2.18	1.17	1.37063	9.2791e-12
176208	C13G5.2	NM_066496.3	1	NC_003281.10	8616868	8618438	30.06	36.03	34.01	8.48	7.84	8.01	-2.05324	0
184004	E02H9.9	NM_065162.2	1	NC_003281.10	2467347	2468285	0.54	0.26	0.46	2.73	2.69	3.26	2.75975	2.61603e-15
186936	K03D3.5	NM_070540.1	1	NC_003282.8	16320139	16320506	0	0	0	3.86	4.54	5.4	7.74219	1.40856e-23
175061	Y39G8C.2	NM_064545.3	1	NC_003280.10	14095609	14097390	12.14	8.37	11.66	4.6	4.15	4.34	-1.31076	5.53297e-52					GO:0005634///nucleus+++GO:0005737///cytoplasm	GO:0004672///protein kinase activity+++GO:0005524///ATP binding	GO:0006468///protein phosphorylation+++GO:0018107///peptidyl-threonine phosphorylation+++GO:0018105///peptidyl-serine phosphorylation
6418618	C06C3.9	NM_063596.2	1	NC_003280.10	9376455	9378242	0.75	0.31	0.81	1.09	1.45	1.86	1.22611	1.03097e-05
184744	nas-24	NM_074008.2	1	NC_003283.11	13769669	13771279	0.05	0	0.07	2	2.85	3.53	6.1531	2.98207e-83					GO:0005576///extracellular region	GO:0008233///peptidase activity+++GO:0008237///metallopeptidase activity+++GO:0016787///hydrolase activity+++GO:0008270///zinc ion binding+++GO:0004222///metalloendopeptidase activity+++GO:0046872///metal ion binding	GO:0018996///molting cycle, collagen and cuticulin-based cuticle+++GO:0006508///proteolysis
187756	R09H10.2	NM_069560.1	1	NC_003282.8	10605276	10606834	0.33	0.71	0.88	1.26	1.35	1.57	1.11248	1.77201e-06
187068	cyp-13B2	NM_077968.2	1	NC_003284.9	14225598	14228560	0.28	0.3	0.14	0.64	0.66	0.49	1.2851	1.73974e-06						GO:0005506///iron ion binding+++GO:0016705///oxidoreductase activity, acting on paired donors, with incorporation or reduction of molecular oxygen+++GO:0004497///monooxygenase activity+++GO:0020037///heme binding
180148	skr-5	NM_074992.7	1	NC_003283.11	17347922	17348562	0.48	1.91	1.22	0	0.09	0	-5.49562	1.12246e-11	04141///Protein processing in endoplasmic reticulum+++04120///Ubiquitin mediated proteolysis+++04111///Cell cycle - yeast+++04114///Oocyte meiosis+++04710///Circadian rhythm+++04350///TGF-beta signaling pathway+++04310///Wnt signaling pathway+++04341///Hedgehog signaling pathway - fly+++04110///Cell cycle		M00379///SCF-MET30 complex+++M00380///SCF-BTRC complex+++M00407///SCF-CDC4 complex+++M00382///SCF-FBS complex+++M00387///SCF-FBW7 complex+++M00411///SCF-GRR1 complex+++M00381///SCF-SKP2 complex			GO:0016874///ligase activity	GO:0008340///determination of adult lifespan+++GO:0006511///ubiquitin-dependent protein catabolic process
179215	clec-219	NM_072747.5	1	NC_003283.11	8318458	8322803	0	0.04	0.04	3.78	5.95	8.22	7.75926	2.66469e-92						GO:0030246///carbohydrate binding
178215	pgp-1	NM_070012.4	1	NC_003282.8	12591828	12599167	61.83	20.92	75.04	18.02	18.87	18.13	-1.51961	0	02010///ABC transporters+++04976///Bile secretion	H01227///Inflammatory bowel disease (IBD)+++H01529///Avascular necrosis of femoral head+++H01709///Glucocorticoid-induced osteonecrosis			GO:0016020///membrane+++GO:0016021///integral component of membrane+++GO:0016324///apical plasma membrane	GO:0015562///efflux transmembrane transporter activity+++GO:0005524///ATP binding+++GO:0000166///nucleotide binding+++GO:0042626///ATPase activity, coupled to transmembrane movement of substances+++GO:0016887///ATPase activity	GO:0045087///innate immune response+++GO:0055085///transmembrane transport+++GO:0010038///response to metal ion+++GO:0093002///response to nematicide
179429	lys-2	NM_073242.5	1	NC_003283.11	10280368	10281444	107.14	63.04	131.4	187.45	224.77	207.78	1.02786	0						GO:0003796///lysozyme activity	GO:0009253///peptidoglycan catabolic process+++GO:0045087///innate immune response+++GO:0002376///immune system process
178689	clec-208	NM_071168.3	1	NC_003283.11	2097953	2099111	0.55	0.13	1.4	5.3	5.66	6.71	3.09053	1.35651e-65						GO:0030246///carbohydrate binding
177516	F13B6.3	NM_068792.4	1	NC_003282.8	7462013	7465956	4.24	2.49	4.48	1.74	1.69	1.91	-1.07667	9.6699e-23
191087	srt-13	NM_001330845.1+++NM_071772.2	2	NC_003283.11	4247969	4250147	0.13	0.27	0.19	0.41	0.42	0.34	1.54732	0.000339167					GO:0016020///membrane+++GO:0016021///integral component of membrane
188554	T16G1.6	NM_073833.5	1	NC_003283.11	12935582	12937159	15.86	14.08	18.27	4.74	4.91	5.08	-1.71737	6.22414e-190
188381	T10D4.7	NM_062050.2	1	NC_003280.10	3117771	3118410	0	0.19	0	0.55	0.5	0.52	2.96654	7.72191e-05
180489	F09E10.1	NM_075885.1	1	NC_003284.9	1502886	1503219	6.84	14.76	11.08	48.1	64.77	50.62	2.2305	2.73523e-114
187344	K12H6.5	NM_061975.2	1	NC_003280.10	2825662	2826598	0	0	0	0.28	0.58	0.74	5.88593	6.7368e-08
187382	M01G12.5	NM_060665.1	1	NC_003279.8	12130070	12131381	0.18	0.32	0.19	0	0	0	-5.21998	2.08627e-05					GO:0005615///extracellular space
184584	F16G10.10	NM_061863.2	1	NC_003280.10	2389582	2390984	0	0	0	0.12	0.31	0.61	5.19787	2.9628e-05
188666	fbxa-71	NM_065125.2	1	NC_003281.10	2256004	2256949	0.64	1.94	0.51	0.26	0.5	0.21	-1.71456	2.62567e-08
266827	abf-1	NM_058852.5	1	NC_003279.8	3886111	3887080	0.18	0.5	0.19	1.16	1.24	2.28	2.34987	0.000303561					GO:0005576///extracellular region		GO:0098542///defense response to other organism
183126	irg-6	NM_001268758.1+++NM_001268759.1	2	NC_003282.8	12912790	12914956	0.1	0.25	0.16	0.55	0.72	0.73	1.91691	5.89421e-11
189343	clec-129	NM_062181.1	1	NC_003280.10	3571491	3572883	0	0	0	0.3	0.37	1.01	6.11541	4.72806e-09						GO:0030246///carbohydrate binding
190258	Y54E2A.9	NM_064664.1	1	NC_003280.10	14785235	14785995	32.85	23.41	30.33	8.11	8.79	10.02	-1.70433	7.59309e-137
179430	lys-3	NM_073243.3	1	NC_003283.11	10282215	10283444	0.67	0.5	0.85	1.95	0.79	1.43	1.03935	4.58924e-06							GO:0045087///innate immune response+++GO:1990169///stress response to copper ion
191061	fbxa-151	NM_064961.1	1	NC_003281.10	1265673	1266855	0.59	0.69	0.99	1.78	1.73	1.98	1.26595	2.98955e-09							GO:0045087///innate immune response
183113	fbxc-7	NM_061462.2	1	NC_003280.10	954974	956337	0.03	0.03	0	0.12	0.32	0.09	3.11541	0.000564723
180032	kin-30	NM_074370.5	1	NC_003283.11	15244763	15247487	0.22	0.28	0.41	0.66	0.77	0.55	1.12105	2.46013e-05	04510///Focal adhesion+++04151///PI3K-Akt signaling pathway+++04015///Rap1 signaling pathway+++04014///Ras signaling pathway+++04066///HIF-1 signaling pathway+++04010///MAPK signaling pathway				GO:0043235///receptor complex+++GO:0005887///integral component of plasma membrane+++GO:0016021///integral component of membrane+++GO:0016020///membrane+++GO:0005737///cytoplasm	GO:0004713///protein tyrosine kinase activity+++GO:0004714///transmembrane receptor protein tyrosine kinase activity+++GO:0016301///kinase activity+++GO:0004672///protein kinase activity+++GO:0004888///transmembrane signaling receptor activity+++GO:0005524///ATP binding	GO:0009968///negative regulation of signal transduction+++GO:0070374///positive regulation of ERK1 and ERK2 cascade+++GO:0018108///peptidyl-tyrosine phosphorylation+++GO:0006468///protein phosphorylation+++GO:0008284///positive regulation of cell proliferation+++GO:0030154///cell differentiation+++GO:0016310///phosphorylation+++GO:0043066///negative regulation of apoptotic process
173009	clec-94	NM_060466.5	1	NC_003279.8	11146463	11148282	0	0	0	1.6	2.72	3.48	8.32256	6.76692e-33						GO:0030246///carbohydrate binding
24105111	Y47D7A.18	NM_001307744.1	1	NC_003283.11	4416022	4416799	0	0	0	0.26	0.27	0.33	5.34987	9.53726e-06
182736	C17F3.3	NM_059516.2	1	NC_003279.8	6682368	6683697	2.03	1.61	1.14	0.89	0.66	0.31	-1.3902	1.47342e-10
191558	ZK1290.10	NM_063184.3	1	NC_003280.10	7552054	7553803	0.47	0.13	0.76	1.29	1.22	1	1.36898	2.45084e-10					GO:0016021///integral component of membrane
189735	Y39B6A.9	NM_171599.1	1	NC_003283.11	19136509	19138986	1.27	1.07	1.26	4.91	6.55	11.03	2.63618	3.62415e-74
173011	clec-99	NM_060471.3	1	NC_003279.8	11156770	11158831	0.31	0.13	0.18	4.55	5.19	9.05	4.89655	2.24871e-95						GO:0030246///carbohydrate binding
176705	enu-3.5	NM_067277.4	1	NC_003281.10	12878658	12880461	13.88	11.75	12.87	6.4	5.01	5.48	-1.19654	7.83475e-95					GO:0043025///neuronal cell body+++GO:0016021///integral component of membrane+++GO:0016020///membrane		GO:0048846///axon extension involved in axon guidance
175135	Y54E2A.7	NM_064662.4	1	NC_003280.10	14771872	14772961	13.11	11.91	13.34	4.99	4.33	4.71	-1.46286	1.22406e-86					GO:0016021///integral component of membrane+++GO:0016020///membrane
189475	clec-104	NM_060847.1	1	NC_003279.8	12859499	12861197	0.91	0.37	1.19	2.71	2.96	3.7	1.92009	8.69838e-23						GO:0030246///carbohydrate binding
184206	irg-4	NM_069973.5	1	NC_003282.8	12435851	12438190	14.11	23.72	20.44	7.78	8.29	5.89	-1.4281	1.99796e-137					GO:0045121///membrane raft		GO:0045087///innate immune response
3564889	nspc-2	NM_001029182.2	1	NC_003284.9	8535469	8535819	10.42	24.82	11.1	4.14	5.68	4.03	-1.83594	3.46908e-33
177939	ugt-44	NM_069532.4	1	NC_003282.8	10469808	10471775	10.02	16.42	17.36	42.4	40.09	40.43	1.48313	0	00830///Retinol metabolism+++00982///Drug metabolism - cytochrome P450+++01100///Metabolic pathways+++00040///Pentose and glucuronate interconversions+++00860///Porphyrin and chlorophyll metabolism+++01110///Biosynthesis of secondary metabolites+++00980///Metabolism of xenobiotics by cytochrome P450+++00053///Ascorbate and aldarate metabolism+++00983///Drug metabolism - other enzymes+++00140///St…	H00208///Hyperbilirubinemia+++H02152///Transient familial neonatal hyperbilirubinemia+++H02055///Gilbert syndrome+++H01593///Osteoporosis+++H02054///Crigler-Najjar syndrome	M00129///Ascorbate biosynthesis, animals, glucose-1P => ascorbate+++M00014///Glucuronate pathway (uronate pathway)	R08262///Morphine + UDP-glucuronate <=> Morphine-3-glucuronide + UDP+++R09428///UDPglucuronate beta-D-glucuronosyltransferase (acceptor-unspecific) UDP-glucuronate + Acceptor <=> UDP + Acceptor beta-D-glucuronoside+++R09426///4-(Methylnitrosamino)-1-(3-pyridyl)-1-butanol + UDP-glucuronate <=> 4-(Methylnitrosamino)-1-(3-pyridyl)-1-butanol glucuronide + UDP+++R08263///Morphine + UDP-glucuronate <=>…	GO:0016021///integral component of membrane+++GO:0016020///membrane+++GO:0043231///intracellular membrane-bounded organelle	GO:0016740///transferase activity+++GO:0016758///transferase activity, transferring hexosyl groups+++GO:0008194///UDP-glycosyltransferase activity	GO:0045087///innate immune response
185221	col-83	NM_063966.2	1	NC_003280.10	11044135	11045968	0.57	0.22	0.72	1.15	1.23	0.92	1.11695	3.03479e-06					GO:0005615///extracellular space+++GO:0005581///collagen trimer+++GO:0031012///extracellular matrix+++GO:0016020///membrane+++GO:0016021///integral component of membrane	GO:0005201///extracellular matrix structural constituent+++GO:0042302///structural constituent of cuticle	GO:0030198///extracellular matrix organization
190130	Y51A2B.5	NM_075196.2	1	NC_003283.11	18389280	18391277	8.82	7.57	7.38	3.1	3.5	4.34	-1.13857	5.4529e-20
190182	clec-92	NM_060456.1	1	NC_003279.8	11015486	11017497	0	0.05	0	3.62	6.51	9.31	8.69328	3.42454e-80						GO:0030246///carbohydrate binding
183965	timm-17B.2	BGIR6239_29538+++NM_001307120.1+++NM_069026.2	3	NC_003282.8	8396493	8398443	16.64	15.41	17.41	7.51	8.03	6.89	-1.10854	2.43683e-25					GO:0031305///integral component of mitochondrial inner membrane+++GO:0005744///TIM23 mitochondrial import inner membrane translocase complex	GO:0015450///P-P-bond-hydrolysis-driven protein transmembrane transporter activity	GO:0030150///protein import into mitochondrial matrix
187268	K10D11.3	NM_001268762.1+++NM_001268763.1+++NM_001268764.1	3	NC_003282.8	12982207	12986088	0.63	0.43	0.68	1.39	1.28	1.04	1.07976	2.06073e-09
174895	lips-15	NM_064289.3	1	NC_003280.10	12605976	12606991	17.22	32.69	19.74	6.51	9.59	11.32	-1.3614	1.10759e-123	04212///Longevity regulating pathway - worm					GO:0016787///hydrolase activity
188839	T24C2.2	NM_078020.1	1	NC_003284.9	14545855	14546720	0.09	0.14	0.1	1.12	0.71	0.88	3.02794	1.80821e-10
24104581	F43G6.17	NM_001276748.1	1	NC_003280.10	11802902	11803925	0.18	0.05	0.27	0.61	0.28	0.79	1.75577	3.03637e-05						GO:0016787///hydrolase activity
191111	ZC204.6	NM_061621.1	1	NC_003280.10	1644249	1644814	0	0	0	0.27	0.42	0.44	5.11541	5.25186e-05
13212329	grl-30	NM_001269098.1	1	NC_003283.11	3556286	3556804	0.34	0.88	0.17	3.67	3.23	1.97	2.59869	1.44005e-15
185758	F44G3.10	NM_074662.3	1	NC_003283.11	16138846	16139616	0.28	0.13	1.69	6.76	7.5	5.5	3.21909	7.94375e-50					GO:0016021///integral component of membrane+++GO:0016020///membrane		GO:0045087///innate immune response
180477	F56C3.8	NM_075855.4	1	NC_003284.9	1384361	1384638	0	0.24	0.27	1.71	2.76	4.05	3.98214	1.56374e-07
181308	col-179	NM_077469.6	1	NC_003284.9	11201539	11202442	293.09	664.25	309.05	1417.38	1231.14	1414.91	1.66144	0					GO:0005581///collagen trimer+++GO:0031012///extracellular matrix+++GO:0016020///membrane+++GO:0016021///integral component of membrane+++GO:0005615///extracellular space	GO:0042302///structural constituent of cuticle+++GO:0005201///extracellular matrix structural constituent	GO:0045087///innate immune response+++GO:0030198///extracellular matrix organization
186347	F56A4.4	NM_071270.3	1	NC_003283.11	2447895	2449136	0.1	0	0.05	1.61	0.85	0.94	4.53044	1.17243e-08	00480///Glutathione metabolism+++00983///Drug metabolism - other enzymes+++00982///Drug metabolism - cytochrome P450+++00980///Metabolism of xenobiotics by cytochrome P450	H00516///Cleft lip and/or cleft palate+++H00024///Prostate cancer		R08280///4-glutathionyl cyclophosphamide hydrolase Aldophosphamide + Glutathione <=> 4-Glutathionyl cyclophosphamide + H2O+++R07084///7,8-dihydro-7-hydroxy-8-S-glutathionyl-benzo[a]pyrene hydrolase Benzo[a]pyrene-7,8-diol + Glutathione <=> 7,8-Dihydro-7-hydroxy-8-S-glutathionyl-benzo[a]pyrene + H2O+++R07003///(1R)-glutathionyl-(2R)-hydroxy-1,2-dihydronaphthalene glutathione-lyase (epoxide-forming…		GO:0004364///glutathione transferase activity	GO:0006749///glutathione metabolic process+++GO:0010286///heat acclimation+++GO:0055114///oxidation-reduction process+++GO:0042542///response to hydrogen peroxide+++GO:0010225///response to UV-C+++GO:0008340///determination of adult lifespan
184792	F21G4.3	NM_077259.2	1	NC_003284.9	9895144	9897057	0.55	0	0.27	0.57	1.41	0.71	1.68846	3.3227e-09
186352	irld-35	NM_001316814.1+++NM_071248.1	2	NC_003283.11	2456176	2458286	0.05	0	0.04	2.91	3.69	2.1	6.73335	1.59878e-79
180684	hrg-1	NM_076289.8	1	NC_003284.9	4008235	4008972	11.29	4.64	12.63	20.25	21.29	30.61	1.33103	7.81947e-77					GO:0005765///lysosomal membrane+++GO:0005768///endosome+++GO:0010008///endosome membrane+++GO:0016020///membrane+++GO:0016021///integral component of membrane+++GO:0005764///lysosome	GO:0015232///heme transporter activity+++GO:0020037///heme binding	GO:0015886///heme transport
173183	clec-109	NM_001265166.1+++NM_001265167.1	2	NC_003279.8	13197218	13198374	0	0	0	0.16	0.33	0.2	4.72838	0.000537944						GO:0030246///carbohydrate binding
187559	R03H10.7	NM_062333.3	1	NC_003280.10	4177454	4178927	1.09	0.46	1.17	1.8	1.9	1.87	1.02099	5.48229e-09	03440///Homologous recombination+++03030///DNA replication+++03460///Fanconi anemia pathway+++03420///Nucleotide excision repair+++03430///Mismatch repair		M00288///RPA complex
191317	ZK418.6	NM_066144.2	1	NC_003281.10	7076614	7078835	0.38	0.26	0.58	0.95	1.48	0.65	1.3328	1.9251e-08					GO:0016020///membrane+++GO:0016021///integral component of membrane
184273	fbxa-88	NM_074664.4	1	NC_003283.11	16142042	16143116	0.09	0.15	0.13	0.89	0.7	0.58	2.53044	1.53181e-10
184925	F25E5.3	NM_072514.1	1	NC_003283.11	7451721	7452899	0.52	0.49	0.23	1.73	1.96	2.19	2.23584	6.37105e-29
175758	D1044.7	NM_065776.3	1	NC_003281.10	5507050	5508730	0.76	0.96	0.61	0.19	0.37	0.41	-1.27272	1.83668e-06					GO:0016021///integral component of membrane
3565038	R05H10.7	NM_001027100.3	1	NC_003280.10	14855536	14856949	0	0	0.23	2.83	3.16	4.08	5.4742	2.01214e-52					GO:0005737///cytoplasm	GO:0008080///N-acetyltransferase activity	GO:0006807///nitrogen compound metabolic process
189471	Y18D10A.2	NM_060839.2	1	NC_003279.8	12807588	12809296	0	0	0.05	0.35	1.47	1.2	5.93483	3.31874e-15
180038	dhs-23	NM_074419.4	1	NC_003283.11	15381261	15382189	2.6	2.11	2.62	0.65	0.83	0.49	-1.91761	2.88844e-21						GO:0016491///oxidoreductase activity	GO:0055114///oxidation-reduction process
183713	srv-6	NM_076327.3	1	NC_003284.9	4257061	4259094	0.23	0.06	0.12	0.03	0	0	-3.77941	0.000826667					GO:0016020///membrane+++GO:0016021///integral component of membrane	GO:0004888///transmembrane signaling receptor activity	GO:0007606///sensory perception of chemical stimulus
3565413	col-135	NM_001268929.1+++NM_001268930.1	2	NC_003282.8	15129759	15131786	0.63	2.38	0.26	0.21	0.27	0.03	-2.69452	6.26323e-35					GO:0005581///collagen trimer+++GO:0031012///extracellular matrix+++GO:0005615///extracellular space	GO:0005201///extracellular matrix structural constituent	GO:0030198///extracellular matrix organization
191330	ZK488.5	NM_070856.1	1	NC_003283.11	593274	595677	0.07	0	0.04	0.57	0.46	0.28	3.63281	2.21879e-15
182739	C17F4.8	NM_062084.2	1	NC_003280.10	3230877	3234813	0.1	0.15	0.15	0.78	0.38	0.44	1.98214	0.000298937							GO:0051260///protein homooligomerization
187486	clec-258	NM_075435.1	1	NC_003283.11	19788704	19789281	17.53	11.88	17.52	30.41	35.84	33.48	1.06116	3.91954e-62						GO:0030246///carbohydrate binding
184232	F09C6.3	NM_074864.2	1	NC_003283.11	16878827	16880154	0.22	0.64	0.4	0	0.05	0	-4.83004	1.4265e-07
183987	E02C12.6	NM_073025.2	1	NC_003283.11	9369549	9371086	1.4	0.74	2.09	0.54	0.61	0.35	-1.50509	3.01057e-14
183883	D1005.5	NM_075878.4	1	NC_003284.9	1470998	1472919	0.14	0.46	0.07	0.04	0	0	-4.21998	4.46811e-05
177823	col-123	NM_069355.3	1	NC_003282.8	9821895	9823066	0.29	0.62	0.64	1.4	1.23	1.25	1.31523	2.51875e-09					GO:0005615///extracellular space+++GO:0005581///collagen trimer+++GO:0031012///extracellular matrix	GO:0042302///structural constituent of cuticle+++GO:0005201///extracellular matrix structural constituent	GO:0030198///extracellular matrix organization
3896771	F56D6.11	NM_001038324.1	1	NC_003282.8	3906113	3906493	0	0	0	9.57	9.18	10.07	9.18276	2.54956e-53					GO:0016021///integral component of membrane+++GO:0016020///membrane
13215750	F23H12.10	NM_001347270.1	1	NC_003283.11	12373904	12374231	3.33	3.45	2.72	1.93	0.69	0	-2.01645	0.000180162	04110///Cell cycle+++04914///Progesterone-mediated oocyte maturation+++04152///AMPK signaling pathway+++04218///Cellular senescence		M00693///Cell cycle - G2/M transition
177179	R07C12.1	NM_068096.1	1	NC_003282.8	4152547	4154029	0.76	0.89	1.41	0.43	0.36	0.11	-1.77275	1.74275e-10							GO:0045087///innate immune response
190938	Y110A2AL.7	NM_061981.1	1	NC_003280.10	2842608	2843188	0	0	0	5.06	5.1	9.03	9.1207	1.63664e-51
178246	F55G11.7	NM_070079.3	1	NC_003282.8	12960536	12962120	0	0.03	0.11	0.56	0.79	0.31	3.54975	3.98151e-12							GO:0045087///innate immune response
190228	gst-31	NM_064720.1	1	NC_003280.10	15174271	15174947	0.15	0.67	0.3	0	0.11	0.1	-2.49562	0.000386108	00980///Metabolism of xenobiotics by cytochrome P450+++00982///Drug metabolism - cytochrome P450+++01100///Metabolic pathways+++00983///Drug metabolism - other enzymes+++00480///Glutathione metabolism+++00590///Arachidonic acid metabolism	H00024///Prostate cancer+++H00516///Cleft lip and/or cleft palate		R07116///2-bromoacetaldehyde:glutathione S-(formylmethyl)transferase 2-Bromoacetaldehyde + Glutathione <=> S-(Formylmethyl)glutathione + Hydrobromic acid+++R07004///(1S)-hydroxy-(2S)-glutathionyl-1,2-dihydronaphthalene glutathione-lyase (epoxide-forming) (1S,2R)-Naphthalene 1,2-oxide + Glutathione <=> (1S)-Hydroxy-(2S)-glutathionyl-1,2-dihydronaphthalene+++R09409///glutathione-S-transferase Aflat…		GO:0016740///transferase activity
184332	F11A5.5	NM_001129436.2+++NM_074684.1	2	NC_003283.11	16198450	16201029	0.21	0	0.11	0.4	0.27	0.38	1.76491	0.000138511					GO:0016020///membrane+++GO:0016021///integral component of membrane	GO:0008107///galactoside 2-alpha-L-fucosyltransferase activity	GO:0043413///macromolecule glycosylation+++GO:0005975///carbohydrate metabolic process+++GO:0036065///fucosylation
185446	nspb-4	NM_068611.1	1	NC_003282.8	6598234	6598531	0	0.53	0.4	1.86	4.82	0.87	2.85495	1.09444e-06
3896806	Y54G2A.49	NM_001038360.1+++NM_001307336.1	2	NC_003282.8	2851748	2853261	4.92	6.26	7.15	3.14	2.57	3.73	-1.00256	9.01465e-10					GO:0016021///integral component of membrane+++GO:0016020///membrane
173091	Y47H10A.5	NM_060655.3	1	NC_003279.8	12095804	12097939	7.17	5.29	7.4	16.87	16.46	17.34	1.34108	6.51861e-103
176601	pqn-84	NM_067113.4	1	NC_003281.10	11700337	11702819	1.37	0.3	0.64	1.6	1.58	2.44	1.27917	4.25677e-13						GO:0030246///carbohydrate binding
189517	fbxa-13	NM_065047.1	1	NC_003281.10	1703547	1705486	0.54	0.4	0.77	1.37	1.61	0.88	1.15227	3.88581e-06
181993	clec-2	NM_062026.3	1	NC_003280.10	3020585	3023431	0.09	0.02	0.16	0.19	0.36	0.4	1.80053	8.91077e-05						GO:0030246///carbohydrate binding
191676	his-30	NM_069003.1	1	NC_003282.8	8331666	8332049	1.35	2.47	1.57	3.97	5.33	4.32	1.2772	1.72004e-08	04217///Necroptosis				GO:0000786///nucleosome+++GO:0000790///nuclear chromatin	GO:0003677///DNA binding+++GO:0046982///protein heterodimerization activity	GO:0006281///DNA repair+++GO:0006355///regulation of transcription, DNA-templated+++GO:0006342///chromatin silencing
187798	R11A8.1	NM_069508.2	1	NC_003282.8	10355123	10357162	17.05	13.86	12.98	8.03	7.67	6.27	-1.00996	1.08244e-106
191046	fbxa-78	NM_064957.3	1	NC_003281.10	1257232	1258414	0.89	1.04	2.47	3.56	4.44	2.7	1.26871	6.05886e-17							GO:0045087///innate immune response
189941	Y46B2A.2	NM_061433.1	1	NC_003280.10	851656	856210	0	0	0	0.04	0.03	0.11	5.89337	6.21837e-08						GO:0016787///hydrolase activity+++GO:0005524///ATP binding+++GO:0004386///helicase activity+++GO:0000166///nucleotide binding+++GO:0003678///DNA helicase activity	GO:0006310///DNA recombination+++GO:0006281///DNA repair+++GO:0032508///DNA duplex unwinding+++GO:0000723///telomere maintenance+++GO:0006974///cellular response to DNA damage stimulus
174382	F28C6.10	NM_063426.3	1	NC_003280.10	8608001	8608786	0.54	0.67	0.63	1.7	1.36	1.9	1.39718	5.91179e-05
183184	C33H5.2	NM_068893.1	1	NC_003282.8	7805065	7807948	0	0	0	0.09	0.1	0.23	5.55151	1.77571e-06					GO:0016021///integral component of membrane+++GO:0016020///membrane	GO:0016757///transferase activity, transferring glycosyl groups+++GO:0016740///transferase activity
173760	clec-135	NM_062349.1	1	NC_003280.10	4257092	4258781	0.05	0	0	0.64	1.07	0.84	5.72838	2.5201e-13						GO:0030246///carbohydrate binding
182114	catp-2	NM_001322555.1+++NM_071927.1	2	NC_003283.11	4934738	4939085	0.02	0.04	0.05	0	0	0.01	-3.77941	0.000826667	04919///Thyroid hormone signaling pathway+++04970///Salivary secretion+++04978///Mineral absorption+++04925///Aldosterone synthesis and secretion+++04260///Cardiac muscle contraction+++04973///Carbohydrate digestion and absorption+++04024///cAMP signaling pathway+++04972///Pancreatic secretion+++04974///Protein digestion and absorption+++04961///Endocrine and other factor-regulated calcium reabso…	H01603///Primary aldosteronism+++H00831///Primary dystonia+++H00775///Familial or sporadic hemiplegic migraine+++H00998///Alternating hemiplegia of childhood			GO:0016020///membrane+++GO:0005623///cell+++GO:0016021///integral component of membrane	GO:0016787///hydrolase activity+++GO:0005524///ATP binding+++GO:0000166///nucleotide binding+++GO:0005391///sodium:potassium-exchanging ATPase activity	GO:1990573///potassium ion import across plasma membrane+++GO:0010248///establishment or maintenance of transmembrane electrochemical gradient+++GO:0006883///cellular sodium ion homeostasis+++GO:0015991///ATP hydrolysis coupled proton transport+++GO:0030007///cellular potassium ion homeostasis+++GO:0036376///sodium ion export across plasma membrane
13220027	T14G12.11	NM_001270074.1	1	NC_003284.9	3760949	3762547	0	0	0	0.59	0.36	0.37	5.78283	1.98178e-07
182326	C06E4.3	NM_068755.3	1	NC_003282.8	7260926	7262028	2.53	1.28	3.02	0.69	0.76	0.42	-1.89209	1.79615e-19
187343	K12H6.4	NM_061973.3	1	NC_003280.10	2823757	2824180	0	0	0	5.64	8.66	8.11	8.45421	1.89905e-35
188270	fbxa-201	NM_071140.4	1	NC_003283.11	1975531	1976819	1.82	1.51	2.82	0.91	1.04	1.01	-1.08753	0.000271323
187886	R53.8	NM_063755.1	1	NC_003280.10	9976705	9977832	0	0	0	1.2	0.88	1.89	7.09403	3.66716e-16
189485	irld-53	NM_001316775.1+++NM_001316835.1+++NM_001316836.1+++NM_001316837.1	4	NC_003283.11	2348215	2350325	0.28	0.07	0.04	2.91	3.69	2.87	4.87152	2.99344e-85
3564846	ZK381.8	NM_001028443.2	1	NC_003282.8	6968209	6970280	0.1	0	0.37	0.62	0.84	0.68	2.19192	2.67968e-15					GO:0016021///integral component of membrane	GO:0016757///transferase activity, transferring glycosyl groups
6418571	C04F12.12	NM_001128945.1	1	NC_003279.8	9694622	9695035	14.13	12.86	19.61	40	46.4	42.65	1.43364	2.544e-95
180892	C14F11.7	NM_076640.5	1	NC_003284.9	6208202	6208498	0	0	0.2	3.92	2.87	5.4	5.95868	1.94292e-15
183525	C47A4.1	NM_070247.2	1	NC_003282.8	13715906	13716379	0	0	0	0.45	0.46	0.21	4.92809	0.000173937					GO:0005789///endoplasmic reticulum membrane		GO:0006457///protein folding
189949	clec-75	NM_001356917.1	1	NC_003282.8	3960734	3962846	0.07	0.09	0.12	0.56	0.41	0.38	2.30096	2.66896e-08						GO:0030246///carbohydrate binding
183329	C39B5.10	NM_065118.1	1	NC_003281.10	2238967	2240172	0	0	0	0.22	0.53	0.64	5.6718	5.88767e-07
174706	bigr-1	NM_001267365.1+++NM_001267366.1	2	NC_003280.10	11181661	11183030	10.18	10.18	8.57	4.41	5.34	4.7	-1.02668	1.47577e-25						GO:0016787///hydrolase activity	GO:0008152///metabolic process
191358	ZK616.1	NM_068404.2	1	NC_003282.8	5403125	5405537	0.32	0.78	0.24	0.94	1.32	1.02	1.26241	2.3139e-05					GO:0005737///cytoplasm+++GO:1990904///ribonucleoprotein complex+++GO:0005634///nucleus	GO:0003729///mRNA binding+++GO:0003676///nucleic acid binding+++GO:0003723///RNA binding	GO:0006376///mRNA splice site selection+++GO:0000381///regulation of alternative mRNA splicing, via spliceosome
3565970	F54D12.9	NM_001027025.3	1	NC_003280.10	1380990	1381699	0	0	0	3.06	5.91	5.49	8.40298	1.96725e-34
3564933	ugt-39	NM_072415.3+++NM_182344.3	2	NC_003283.11	7157312	7159120	1.25	1.02	2.52	3.32	4.49	3.19	1.19086	2.13505e-31	01110///Biosynthesis of secondary metabolites+++00860///Porphyrin and chlorophyll metabolism+++00140///Steroid hormone biosynthesis+++00983///Drug metabolism - other enzymes+++00040///Pentose and glucuronate interconversions+++00053///Ascorbate and aldarate metabolism+++01100///Metabolic pathways+++00830///Retinol metabolism+++00982///Drug metabolism - cytochrome P450+++00980///Metabolism of xeno…	H02055///Gilbert syndrome+++H00208///Hyperbilirubinemia+++H01593///Osteoporosis+++H02054///Crigler-Najjar syndrome+++H02152///Transient familial neonatal hyperbilirubinemia	M00014///Glucuronate pathway (uronate pathway)+++M00129///Ascorbate biosynthesis, animals, glucose-1P => ascorbate	R02478///UDPglucuronate beta-D-glucuronosyltransferase(acceptor-unspecific) Androsterone + UDP-glucuronate <=> Androsterone glucuronide + UDP+++R07106///UDP-glucuronate beta-D-glucuronosyltransferase Trichloroethanol + UDP-glucuronate <=> Trichloroethanol glucuronide + UDP+++R04354///UDPglucuronate beta-D-glucuronosyltransferase(acceptor-unspecific) 2-Methoxy-17beta-estradiol + UDP-glucuronate <=…	GO:0016021///integral component of membrane+++GO:0043231///intracellular membrane-bounded organelle+++GO:0016020///membrane	GO:0016758///transferase activity, transferring hexosyl groups+++GO:0008194///UDP-glycosyltransferase activity+++GO:0016740///transferase activity	GO:0008152///metabolic process
183204	zip-5	NM_001129401.1+++NM_001129402.1+++NM_073891.1	3	NC_003283.11	13264546	13269820	2.99	2.04	4.23	7.05	5.1	7.4	1.06828	1.59693e-17						GO:0003700///DNA-binding transcription factor activity	GO:0006355///regulation of transcription, DNA-templated
3896798	Y54G2A.41	NM_001038352.1	1	NC_003282.8	2751882	2753373	7.37	5.02	5.91	2.56	1.43	2.26	-1.5845	6.83985e-13
177246	Y17G9B.8	NM_068234.6	1	NC_003282.8	4757314	4758117	11.83	10.46	11.22	26.43	25.71	22.53	1.13394	3.28476e-78					GO:0005671///Ada2/Gcn5/Ada3 transcription activator complex+++GO:0000124///SAGA complex	GO:0001135///RNA polymerase II transcription regulator recruiting activity+++GO:0035064///methylated histone binding	GO:0051123///RNA polymerase II preinitiation complex assembly+++GO:0043966///histone H3 acetylation
191303	tbx-32	BGIR6239_29896+++NM_075903.3	2	NC_003284.9	1654322	1657674	1.39	2.71	2.81	4.9	6.52	5.57	1.24762	2.03505e-10					GO:0005634///nucleus	GO:0003700///DNA-binding transcription factor activity+++GO:0003677///DNA binding	GO:0006355///regulation of transcription, DNA-templated
174576	lov-1	NM_063783.3	1	NC_003280.10	10109279	10121825	0.02	0	0.01	0.08	0.04	0.09	2.90836	3.75753e-14		H01728///Potter syndrome+++H00542///Polycystic kidney disease			GO:0016020///membrane+++GO:0097730///non-motile cilium+++GO:0043025///neuronal cell body+++GO:0016021///integral component of membrane+++GO:0005929///cilium+++GO:0042995///cell projection	GO:0019904///protein domain specific binding+++GO:0005515///protein binding+++GO:0005262///calcium channel activity	GO:0050982///detection of mechanical stimulus+++GO:0034606///response to hermaphrodite contact+++GO:0007610///behavior+++GO:0034608///vulval location+++GO:0007617///mating behavior+++GO:0070588///calcium ion transmembrane transport+++GO:0060179///male mating behavior
187224	oac-57	NM_001268709.1+++NM_001268710.1	2	NC_003282.8	12304464	12307820	0.85	0.36	0.75	1.37	1.61	1.21	1.09495	7.99014e-12					GO:0016020///membrane+++GO:0016021///integral component of membrane	GO:0016746///transferase activity, transferring acyl groups+++GO:0016747///transferase activity, transferring acyl groups other than amino-acyl groups+++GO:0016740///transferase activity	GO:0033692///cellular polysaccharide biosynthetic process
179053	cpr-4	NM_072281.5	1	NC_003283.11	6614712	6615768	120.91	77.32	146.43	301.72	296.5	303.5	1.37946	0	04924///Renin secretion+++04140///Autophagy - animal+++04210///Apoptosis+++04612///Antigen processing and presentation+++04621///NOD-like receptor signaling pathway+++04142///Lysosome	H00932///Tropical calcific pancreatitis			GO:0005615///extracellular space+++GO:0005764///lysosome+++GO:0005576///extracellular region	GO:0016787///hydrolase activity+++GO:0004197///cysteine-type endopeptidase activity+++GO:0008233///peptidase activity+++GO:0008234///cysteine-type peptidase activity	GO:0006508///proteolysis+++GO:0071480///cellular response to gamma radiation+++GO:0051603///proteolysis involved in cellular protein catabolic process+++GO:0034644///cellular response to UV
190226	gst-39	NM_064718.3	1	NC_003280.10	15171229	15171910	20.02	26.36	20.33	62.61	59.9	66.26	1.47679	2.87018e-255	00983///Drug metabolism - other enzymes+++00980///Metabolism of xenobiotics by cytochrome P450+++00480///Glutathione metabolism+++00982///Drug metabolism - cytochrome P450	H00024///Prostate cancer+++H00516///Cleft lip and/or cleft palate		R03522///RX:glutathione R-transferase RX + Glutathione <=> Halide + R-S-Glutathione+++R07003///(1R)-glutathionyl-(2R)-hydroxy-1,2-dihydronaphthalene glutathione-lyase (epoxide-forming) (1S,2R)-Naphthalene 1,2-oxide + Glutathione <=> (1R)-Glutathionyl-(2R)-hydroxy-1,2-dihydronaphthalene+++R09409///glutathione-S-transferase Aflatoxin B1-exo-8,9-epoxide + Glutathione <=> Aflatoxin B1exo-8,9-epoxide-…	GO:0043292///contractile fiber	GO:0005515///protein binding+++GO:0016740///transferase activity	GO:0006749///glutathione metabolic process
182676	C16C8.9	NM_062152.1	1	NC_003280.10	3462610	3463194	0.07	0	0	3.42	4.31	5.55	7.5198	2.0154e-40
173061	Y47H9C.1	NM_060605.1	1	NC_003279.8	11831025	11833166	1.33	1	1.9	5.45	5.61	4.72	1.89002	3.46519e-61					GO:0045121///membrane raft		GO:0045087///innate immune response
13192832	K08D10.14	NM_001268328.1	1	NC_003282.8	4156254	4157099	4.69	6.4	6.62	2.33	3.06	1.6	-1.38541	1.95007e-18							GO:0045087///innate immune response
176354	C48B4.12	NM_066720.1+++NM_066721.3	2	NC_003281.10	9597359	9598278	0.06	0	0	2.64	2.79	3.46	7.30407	1.61336e-35
174096	T19D12.4	NM_062947.4+++NM_182208.3	2	NC_003280.10	6631168	6636984	17.46	21.74	23.08	41.5	48.24	45.91	1.11986	0					GO:0016021///integral component of membrane+++GO:0016020///membrane+++GO:0045121///membrane raft	GO:0015165///pyrimidine nucleotide-sugar transmembrane transporter activity	GO:0045087///innate immune response
178723	C01B4.6	NM_071283.1	1	NC_003283.11	2501051	2502426	4.87	8.42	6.21	17.88	15.73	17.7	1.38163	1.0206e-108	01110///Biosynthesis of secondary metabolites+++00010///Glycolysis / Gluconeogenesis+++00052///Galactose metabolism+++01120///Microbial metabolism in diverse environments+++01130///Biosynthesis of antibiotics+++01100///Metabolic pathways		M00632///Galactose degradation, Leloir pathway, galactose => alpha-D-glucose-1P	R01602///D-glucose 1-epimerase alpha-D-Glucose <=> beta-D-Glucose+++R10619///D-galactose 1-epimerase; aldose D-Galactose <=> alpha-D-Galactose		GO:0003824///catalytic activity+++GO:0016853///isomerase activity+++GO:0030246///carbohydrate binding+++GO:0004034///aldose 1-epimerase activity	GO:0033499///galactose catabolic process via UDP-galactose+++GO:0019318///hexose metabolic process+++GO:0006006///glucose metabolic process+++GO:0005975///carbohydrate metabolic process
190935	Y110A2AL.2	NM_061987.5	1	NC_003280.10	2868015	2870758	0.39	1.4	0.67	0.15	0.18	0.04	-2.75755	9.92127e-21
190430	clec-260	NM_075467.2	1	NC_003283.11	19982994	19986313	4.62	4.53	6.67	2.18	1.92	3.52	-1.05763	2.87479e-16						GO:0030246///carbohydrate binding
173021	cutl-10	NM_060499.5	1	NC_003279.8	11294639	11297167	3.16	2.07	2.46	1.18	1.1	1.19	-1.15609	2.05055e-16					GO:0016020///membrane+++GO:0016021///integral component of membrane
190960	Y113G7A.12	NM_075481.3	1	NC_003283.11	20144247	20146326	1.63	1.2	1.19	0	0.2	0.18	-3.46391	2.09937e-09
189147	oac-52	NM_068145.2	1	NC_003282.8	4342357	4346558	1.22	1.18	1.03	0.12	0.21	0.14	-2.89262	7.16981e-43					GO:0016020///membrane+++GO:0016021///integral component of membrane	GO:0016747///transferase activity, transferring acyl groups other than amino-acyl groups+++GO:0016746///transferase activity, transferring acyl groups+++GO:0016740///transferase activity	GO:0033692///cellular polysaccharide biosynthetic process
187071	K06H6.2	NM_070853.1	1	NC_003283.11	585848	587250	1.68	0.13	1.61	10.55	13.95	11.03	3.3655	2.33709e-190					GO:0016020///membrane+++GO:0016021///integral component of membrane
186496	scvp-1	NM_073386.1	1	NC_003283.11	10930778	10931289	0.69	0.08	0.35	1.62	1.52	1.18	1.91247	8.61355e-06
185160	F31E9.3	NM_074984.3	1	NC_003283.11	17322843	17324498	0.59	0.74	0.57	1.07	2.23	1.59	1.3458	1.38939e-11
3565377	F34D6.9	NM_001026974.3	1	NC_003280.10	2689917	2690180	0	0	0	0.37	1.39	3.54	5.93483	3.94122e-08
3565878	T02E9.6	NM_001028924.1	1	NC_003283.11	11332987	11334293	0	0	0	0.06	0.12	0.26	4.93483	0.000167117
188008	T02H6.9	NM_061386.1	1	NC_003280.10	679025	679675	0.11	0.21	0.05	3.56	3.68	7.09	5.27044	3.37965e-63
191797	srd-7	NM_069600.1	1	NC_003282.8	10785090	10786831	0.24	0	0.03	0.34	0.35	0.27	1.81222	0.000696071					GO:0016020///membrane+++GO:0016021///integral component of membrane
259559	Y94H6A.10	NM_001028418.4	1	NC_003282.8	2710121	2710666	172.43	204.13	213.49	10.03	13.63	14.36	-3.98162	0
182238	C04G6.6	NM_062541.1	1	NC_003280.10	5099438	5099749	7.34	9.76	5.52	2.65	1.78	1.54	-1.997	5.3995e-19
178241	K08D8.6	NM_001307304.1+++NM_070056.4	2	NC_003282.8	12887292	12890500	24.16	17.8	30.18	45.19	54.76	48.95	1.03831	0					GO:0045121///membrane raft
3565896	gcp-2.3	NM_001029275.1	1	NC_003284.9	11542138	11545061	0.26	0.18	0.34	0.05	0.08	0.06	-1.9959	2.628e-07					GO:0016020///membrane+++GO:0016021///integral component of membrane	GO:0004180///carboxypeptidase activity	GO:0006508///proteolysis
179602	W05E10.1	NM_073556.3	1	NC_003283.11	11689526	11691620	1.42	2.81	2.51	4.03	5.18	4.81	1.04795	4.24336e-30	04142///Lysosome	H00810///Progressive myoclonic epilepsy (PME/ EPM)+++H00149///Neuronal ceroid lipofuscinosis (NCL)			GO:0016020///membrane+++GO:0016021///integral component of membrane		GO:0055085///transmembrane transport
191093	ZC178.2	NM_001350342.1	1	NC_003283.11	8699736	8712010	0.01	0	0	0.41	0.55	0.88	7.16494	9.09841e-128
176964	Y41D4B.17	NM_067698.4	1	NC_003282.8	1560234	1561733	1.18	0.16	1.04	2.24	2.57	2.48	1.61291	6.86075e-25					GO:0045121///membrane raft		GO:0045087///innate immune response
183345	scl-8	NM_070109.1	1	NC_003282.8	13071754	13072478	0.05	0.05	0	0.56	0.96	1.89	5.11541	6.97845e-17					GO:0005615///extracellular space
3565780	K12G11.6	NM_001028886.2	1	NC_003283.11	11894432	11895562	2.23	1.22	2.4	5.05	2.99	4.91	1.13688	4.28502e-11						GO:0004867///serine-type endopeptidase inhibitor activity	GO:0010951///negative regulation of endopeptidase activity
186680	H04D03.3	NM_066904.1	1	NC_003281.10	10443149	10444945	5.32	7.4	5.7	0	0	0.07	-7.99041	4.87464e-169						GO:0032947///protein-containing complex scaffold activity	GO:0043248///proteasome assembly
189215	enu-3.4	NM_001037893.2	1	NC_003279.8	3364027	3365857	3.7	2.45	3.05	1.46	1.71	1.38	-1.02973	1.4988e-18					GO:0016020///membrane+++GO:0043025///neuronal cell body+++GO:0016021///integral component of membrane		GO:0048846///axon extension involved in axon guidance
188635	clec-183	NM_069238.1	1	NC_003282.8	9328010	9328745	0	0	0.05	0.54	0.57	0.66	5.19787	1.83698e-09						GO:0030246///carbohydrate binding
190215	Y53F4B.16	NM_064700.2	1	NC_003280.10	15052085	15055718	0.1	0.07	0.18	0.93	0.97	1.18	3.15218	7.33437e-16
182086	nspb-7	NM_064628.2	1	NC_003280.10	14578313	14578597	5.67	7.53	8	18.11	14.68	14.09	1.06169	7.74182e-10
184619	F17E9.3	NM_069013.2	1	NC_003282.8	8354874	8355433	0	0	0	0.62	1.59	1.82	6.55151	9.95258e-12							GO:0050829///defense response to Gram-negative bacterium
24105195	Y69A2AR.47	NM_001307687.1	1	NC_003282.8	2597717	2597929	1.05	0.7	2.1	0	0	0	-4.87895	0.00020042
177272	msp-55	NM_068310.6	1	NC_003282.8	5055631	5056014	274.99	363.85	252.55	801.15	840.78	732.01	1.35794	0					GO:0031143///pseudopodium+++GO:0005856///cytoskeleton+++GO:0042995///cell projection+++GO:0005737///cytoplasm
3565987	Y102A5C.36	NM_001029038.2	1	NC_003283.11	16926987	16927271	16.49	17.11	14.32	0	0	0	-8.7986	7.46581e-44					GO:0016021///integral component of membrane+++GO:0005886///plasma membrane+++GO:0005634///nucleus+++GO:0044214///spanning component of plasma membrane+++GO:0005737///cytoplasm+++GO:0048471///perinuclear region of cytoplasm	GO:0038023///signaling receptor activity+++GO:0004888///transmembrane signaling receptor activity	GO:0007548///sex differentiation+++GO:0007530///sex determination+++GO:0042001///hermaphrodite somatic sex determination+++GO:0007283///spermatogenesis+++GO:0030154///cell differentiation+++GO:0040021///hermaphrodite germ-line sex determination
259752	tsp-2	NM_066402.1	1	NC_003281.10	8236984	8237873	0.82	0.38	1.14	3.16	1.63	2.89	1.716	7.37402e-16					GO:0016020///membrane+++GO:0016021///integral component of membrane+++GO:0005887///integral component of plasma membrane		GO:0007166///cell surface receptor signaling pathway
176305	T02C1.1	NM_066643.3	1	NC_003281.10	9247644	9248569	7.69	1.41	4.69	10.59	11.61	10.48	1.22288	3.59948e-24					GO:0005622///intracellular	GO:0061630///ubiquitin protein ligase activity+++GO:0046872///metal ion binding	GO:0000209///protein polyubiquitination
188672	col-85	NM_064264.1	1	NC_003280.10	12493800	12495094	0.09	0.15	0.06	0.44	0.49	0.18	1.8353	0.000260336					GO:0016020///membrane+++GO:0016021///integral component of membrane+++GO:0005581///collagen trimer	GO:0042302///structural constituent of cuticle	GO:0040002///collagen and cuticulin-based cuticle development
180094	oac-6	NM_074717.3	1	NC_003283.11	16302769	16306111	1.06	3.25	1.34	4.91	4.23	6.87	1.49983	7.05045e-89					GO:0016021///integral component of membrane+++GO:0016020///membrane	GO:0016740///transferase activity+++GO:0016747///transferase activity, transferring acyl groups other than amino-acyl groups+++GO:0016746///transferase activity, transferring acyl groups
185425	F37D6.3	NM_060343.1	1	NC_003279.8	10486714	10487322	4.87	3.82	2.38	1.68	1.49	2.3	-1.04077	9.95951e-08	03018///RNA degradation+++03015///mRNA surveillance pathway+++03013///RNA transport					GO:0003723///RNA binding
182175	tag-293	NM_072476.4	1	NC_003283.11	7354608	7355491	0.12	0	0.2	2.83	2.74	1.65	4.47916	5.23379e-40
186291	F55C9.3	NM_075351.1	1	NC_003283.11	19287009	19287612	0.07	0	0	0.27	0.72	0.13	4.02794	0.000207571
178797	R08F11.4	NM_071651.3	1	NC_003283.11	3803979	3805504	1.38	0.92	1.25	0.41	0.37	0.4	-1.60107	4.16189e-11					GO:0005737///cytoplasm	GO:0008757///S-adenosylmethionine-dependent methyltransferase activity	GO:0032259///methylation
173029	C27C7.1	BGIR6239_28704+++NM_060522.3	2	NC_003279.8	11438120	11440654	36.94	38.92	30.1	2.97	3.06	2.22	-3.70931	0
3565354	clec-170	NM_171263.6	1	NC_003282.8	1266876	1274289	6.09	8.23	6.73	19.34	21.49	17.97	1.46931	1.79485e-213						GO:0030246///carbohydrate binding	GO:0045087///innate immune response
13191191	Y39A1A.27	NM_001268155.2	1	NC_003281.10	10639033	10639701	0	0	0	0.4	0.42	1.97	4.93483	0.000167117
184664	F19B2.6	NM_075484.2	1	NC_003283.11	20158526	20161500	2.17	2.06	2.36	0.99	0.69	0.81	-1.40311	1.24368e-38
32091598	F22F4.9	BGIR6239_30045+++NM_001350350.1	2	NC_003284.9	5998349	6001538	12.61	7.46	18.86	24.98	33.88	24.73	1.09362	3.88745e-173
189563	comt-2	NM_074774.2	1	NC_003283.11	16493655	16494449	0.33	0.28	0.39	1.86	1.63	2.14	2.49361	5.67675e-17						GO:0008757///S-adenosylmethionine-dependent methyltransferase activity+++GO:0008168///methyltransferase activity+++GO:0008171///O-methyltransferase activity+++GO:0016740///transferase activity	GO:0032259///methylation+++GO:0045087///innate immune response
174496	M176.10	NM_063613.3	1	NC_003280.10	9423377	9426173	0.02	0	0.02	1.06	1.48	2.22	6.87969	7.04681e-54
24104609	F49F1.18	NM_001307496.1	1	NC_003282.8	4139685	4140363	0	0	0	0.5	0.35	0.58	5.72838	3.4073e-07						GO:0030246///carbohydrate binding
178424	pkd-2	NM_070437.4	1	NC_003282.8	15227942	15234973	0.05	0.04	0.09	0.11	0.16	0.33	1.80555	1.95749e-05		H01728///Potter syndrome+++H00542///Polycystic kidney disease			GO:0030424///axon+++GO:0071683///sensory dendrite+++GO:0005886///plasma membrane+++GO:0016020///membrane+++GO:0042995///cell projection+++GO:0005783///endoplasmic reticulum+++GO:0043204///perikaryon+++GO:0005929///cilium+++GO:0016021///integral component of membrane+++GO:0031090///organelle membrane+++GO:0048471///perinuclear region of cytoplasm+++GO:0043025///neuronal cell body+++GO:0060170///ci…	GO:0005262///calcium channel activity+++GO:0005509///calcium ion binding	GO:0050982///detection of mechanical stimulus+++GO:0007617///mating behavior+++GO:0060179///male mating behavior+++GO:0006816///calcium ion transport+++GO:0034608///vulval location+++GO:0023041///neuronal signal transduction+++GO:0007610///behavior+++GO:0070588///calcium ion transmembrane transport+++GO:0034606///response to hermaphrodite contact+++GO:0006811///ion transport
181487	C04A11.2	NM_077888.3	1	NC_003284.9	13666114	13668698	0.1	0.23	0.26	0.49	0.42	0.42	1.17479	0.000506114
3564880	F34D6.7	NM_001026972.1	1	NC_003280.10	2687625	2687888	0	0	0	1.48	0.99	1.18	5.34987	9.53726e-06
180112	T03E6.8	NM_074799.4	1	NC_003283.11	16601033	16602956	1.71	1.36	2.12	0.29	0.48	0.28	-2.32569	6.95477e-24					GO:0016020///membrane+++GO:0016021///integral component of membrane		GO:0050907///detection of chemical stimulus involved in sensory perception
179561	clec-223	NM_073462.4	1	NC_003283.11	11273148	11278068	1.87	4.27	1.16	1.06	0.92	0.79	-1.40932	1.05459e-55						GO:0030246///carbohydrate binding
173687	C16C8.17	NM_062140.1	1	NC_003280.10	3440827	3442445	0	0.06	0.06	0.37	0.51	1.19	4.21777	8.02686e-17
191520	ZK1086.3	NM_077901.3	1	NC_003284.9	13790832	13792258	0	0	0	0.09	0.25	0.11	4.93483	0.000167117
182471	C09G12.5	NM_067955.3	1	NC_003282.8	3479344	3479713	0	0	0	3.59	3.55	7.61	7.86083	3.00223e-25
183685	C50F7.9	NM_068866.1	1	NC_003282.8	7730669	7732060	0	0	0	0.27	0.38	0.32	5.88593	6.7368e-08					GO:0016021///integral component of membrane+++GO:0016020///membrane
180204	Y51A2D.1	NM_001269882.1	1	NC_003283.11	18508873	18512599	0	0	0	0.22	0.13	0.51	5.8353	1.15358e-07					GO:0005764///lysosome+++GO:0005615///extracellular space	GO:0008234///cysteine-type peptidase activity+++GO:0004197///cysteine-type endopeptidase activity	GO:0006508///proteolysis+++GO:0051603///proteolysis involved in cellular protein catabolic process
178838	Y47D7A.2	NM_071818.3	1	NC_003283.11	4420275	4420688	0	0	0	1.66	2.48	2.79	7.00522	2.43491e-15
182602	nhr-155	NM_070838.4	1	NC_003283.11	539460	541433	0.21	0.08	0.48	1.36	1.45	0.82	2.24678	1.94586e-17					GO:0005634///nucleus	GO:0003677///DNA binding+++GO:0043565///sequence-specific DNA binding+++GO:0046872///metal ion binding+++GO:0008270///zinc ion binding+++GO:0003700///DNA-binding transcription factor activity	GO:0006355///regulation of transcription, DNA-templated
184408	F13B6.2	NM_068791.2	1	NC_003282.8	7458961	7460291	2.43	2.41	3.99	6.05	11.37	6.22	1.40148	4.74903e-56
177506	ocr-4	NM_068771.4	1	NC_003282.8	7329679	7332744	0.09	0	0.11	0.23	0.22	0.27	1.84737	1.03801e-06	04928///Parathyroid hormone synthesis, secretion and action+++04961///Endocrine and other factor-regulated calcium reabsorption				GO:0005887///integral component of plasma membrane+++GO:0016020///membrane+++GO:0016021///integral component of membrane	GO:0005216///ion channel activity+++GO:0005262///calcium channel activity	GO:0006811///ion transport+++GO:0070588///calcium ion transmembrane transport+++GO:0034220///ion transmembrane transport+++GO:0055085///transmembrane transport
173532	bath-47	NM_061605.3	1	NC_003280.10	1601832	1604586	1.26	0.35	1.38	2.16	2.4	3.08	1.35837	4.83472e-37
191258	ZK250.2	NM_061736.1	1	NC_003280.10	1948693	1949894	1.43	1.01	1.46	0.41	0.43	0.29	-1.81641	3.44239e-08
187072	nstp-7	NM_070851.3	1	NC_003283.11	581916	583431	0	0	0.08	0.27	0.82	0.81	4.57226	9.08472e-17		H01392///Arthrogryposis, mental retardation, and seizures (AMRS)+++H00606///Early infantile epileptic encephalopathy+++H00119///Congenital disorders of glycosylation (CDG) type II			GO:0005794///Golgi apparatus+++GO:0030173///integral component of Golgi membrane+++GO:0000139///Golgi membrane+++GO:0016021///integral component of membrane+++GO:0016020///membrane	GO:0005459///UDP-galactose transmembrane transporter activity+++GO:0015165///pyrimidine nucleotide-sugar transmembrane transporter activity	GO:0008643///carbohydrate transport+++GO:0090481///pyrimidine nucleotide-sugar transmembrane transport+++GO:0072334///UDP-galactose transmembrane transport
186339	F55G11.6	NM_070078.1	1	NC_003282.8	12958030	12959594	0	0.08	0	0.67	0.52	0.57	4.38714	1.26732e-14
189535	Y25C1A.2	NM_062048.2	1	NC_003280.10	3112620	3113256	0	0.13	0.14	1.52	1.02	1.24	3.8093	3.24663e-12
186379	F56D2.8	NM_065796.4	1	NC_003281.10	5581888	5582411	0.09	0.34	0	4.04	3.29	5.02	4.7613	2.20783e-31
174878	Y57A10B.6	NM_064228.3	1	NC_003280.10	12390156	12392577	0.03	0.12	0.1	0.26	0.22	0.43	1.8353	0.000260336						GO:0005515///protein binding
187082	cri-1	NM_060146.2	1	NC_003279.8	9595669	9598363	0.35	0.11	0.22	0.48	0.55	0.57	1.21698	0.00061286
6418767	T05E12.9	NM_001129532.1	1	NC_003283.11	17080492	17082818	0.06	0.03	0.13	0.39	0.27	0.49	2.39051	9.31391e-06
186581	F59A6.3	NM_062522.1	1	NC_003280.10	5008341	5011179	0	0.02	0.02	0.08	0.13	0.11	2.8353	1.82856e-05
177194	F15E6.9	NM_001307354.1+++NM_001307355.1	2	NC_003282.8	4293621	4299072	0.27	0.1	0.32	0.44	0.41	0.55	1.01344	8.54334e-05
182247	C05C8.8	NM_072443.2	1	NC_003283.11	7252325	7255157	0.25	0.19	0.3	0.52	0.58	0.5	1.10811	0.000277364					GO:0016021///integral component of membrane+++GO:0016020///membrane
184594	F16H6.7	BGIR6239_29870+++NM_075161.3	2	NC_003283.11	18207072	18209195	0.69	0.67	1.18	0.12	0.5	0.06	-1.97206	1.72754e-05							GO:0006508///proteolysis
184019	E03H4.4	NM_060746.2	1	NC_003279.8	12407564	12411435	0	0	0	0.01	0.1	0.04	4.8353	0.000299387					GO:0016021///integral component of membrane+++GO:0016020///membrane
3565537	F26D2.16	NM_001028681.1	1	NC_003283.11	16418433	16419821	0	0	0.02	3.78	5.76	8.81	9.6915	3.3183e-140
175641	clec-157	NM_065601.3	1	NC_003281.10	4843493	4844410	0	0	0	0.32	0.9	0.69	6.42026	7.50942e-11						GO:0030246///carbohydrate binding
13188586	Y46E12A.5	NM_001267915.1	1	NC_003281.10	1757834	1758251	0	0	0	2.43	3.9	1.41	5.27587	1.6801e-05
186870	K02B12.6	NM_059908.1	1	NC_003279.8	8518902	8519500	0.63	0.93	1.54	2.88	5.51	8.1	2.39051	1.41017e-24
186307	acc-3	NM_076409.4	1	NC_003284.9	4723011	4726851	0.19	0.14	0.16	0.47	0.58	0.36	1.50599	1.48678e-06					GO:0005886///plasma membrane+++GO:0005887///integral component of plasma membrane+++GO:0016021///integral component of membrane+++GO:0045202///synapse+++GO:0043005///neuron projection+++GO:0016020///membrane+++GO:0034707///chloride channel complex	GO:0004888///transmembrane signaling receptor activity+++GO:0005254///chloride channel activity+++GO:0005216///ion channel activity+++GO:0005230///extracellular ligand-gated ion channel activity	GO:0050877///nervous system process+++GO:0006811///ion transport+++GO:0007165///signal transduction+++GO:0042391///regulation of membrane potential+++GO:1902476///chloride transmembrane transport+++GO:0006821///chloride transport+++GO:0034220///ion transmembrane transport+++GO:0007268///chemical synaptic transmission
173699	clec-126	NM_062166.3	1	NC_003280.10	3519597	3520421	1.24	0.38	1	2.78	3.29	3.66	1.87594	6.56526e-15						GO:0030246///carbohydrate binding
191543	nep-25	NM_062763.2	1	NC_003280.10	5842243	5844575	0.03	0.14	0.02	0.25	0.39	0.47	2.52271	1.12882e-09						GO:0008237///metallopeptidase activity+++GO:0004222///metalloendopeptidase activity	GO:0006508///proteolysis
184085	F02D10.6	NM_077841.1	1	NC_003284.9	13449656	13451671	0.21	0.61	0.54	1.63	1.37	0.73	1.41497	2.03515e-05					GO:0016021///integral component of membrane+++GO:0016020///membrane
176357	clec-161	NM_066724.3	1	NC_003281.10	9603118	9608687	0.02	0.02	0.01	0.66	1.06	1.78	6.1069	9.85658e-81					GO:0005576///extracellular region	GO:0030246///carbohydrate binding
186723	H11L12.1	NM_078460.1	1	NC_003284.9	17710486	17711674	7.36	11.23	5.59	1.29	0.68	1.22	-2.94112	2.9037e-100
184272	F10A3.1	NM_074663.1	1	NC_003283.11	16140398	16141164	0.07	0	0	0.43	0.98	0.14	4.42026	1.0707e-05					GO:0016021///integral component of membrane+++GO:0016020///membrane		GO:0045087///innate immune response
176567	T28D6.3	NM_067061.5	1	NC_003281.10	11366790	11368349	23.26	57.98	20.24	13.48	17.22	19.88	-1.06932	1.69123e-41
184978	clec-217	NM_072647.1	1	NC_003283.11	7957277	7958840	0	0	0.04	1.07	0.83	1.75	6.5671	1.2691e-22						GO:0030246///carbohydrate binding
4363074	Y55F3BR.10	NM_001047575.1	1	NC_003282.8	832436	832828	1.78	2.57	1.99	0.39	0.31	0.55	-2.38014	7.45153e-10
187265	K10D6.3	NM_001269379.1	1	NC_003283.11	11200665	11201392	4.02	3.89	4.08	1.75	1.34	1.91	-1.29398	3.39508e-08
184863	F22F7.4	NM_001313155.1+++NM_001313156.1	2	NC_003283.11	2103658	2106076	0.06	0.18	0.06	0.84	0.69	0.92	3.25034	3.64662e-26					GO:0016021///integral component of membrane+++GO:0016020///membrane	GO:0016757///transferase activity, transferring glycosyl groups
190001	fbxa-216	NM_060618.3	1	NC_003279.8	11901608	11903170	3.2	4.34	2.92	1.61	1.43	1.51	-1.21306	2.76397e-24
190273	fbxa-48	NM_065129.4	1	NC_003281.10	2267934	2272173	0	0	0	0.12	0.15	0.08	4.61291	0.000971663
190055	cpt-3	NM_065097.3	1	NC_003281.10	2082825	2088237	0.18	0	0.16	0.28	0.51	0.34	1.69632	1.66435e-08					GO:0005739///mitochondrion+++GO:0016021///integral component of membrane+++GO:0016020///membrane	GO:0016740///transferase activity+++GO:0016746///transferase activity, transferring acyl groups+++GO:0004095///carnitine O-palmitoyltransferase activity	GO:0009437///carnitine metabolic process
190299	Y55B1AR.3	NM_064815.1	1	NC_003281.10	602708	603822	1.73	1.07	1.44	0.4	0.55	0.64	-1.43149	1.62951e-09
187491	fbxa-118	NM_075431.2	1	NC_003283.11	19776080	19777174	1.31	1.42	1.28	0.25	0.59	0.18	-2.00548	1.45948e-14
190131	Y51A2B.6	NM_001029086.2	1	NC_003283.11	18392007	18394303	0.78	0.74	1.05	0.27	0.5	0.35	-1.21491	1.18659e-11
185316	F35F10.13	NM_071518.1	1	NC_003283.11	3318208	3319062	0.49	0.63	1	2.08	2.65	2.25	1.69674	1.94553e-11
173010	clec-95	NM_060467.4	1	NC_003279.8	11148983	11150261	0	0.09	0	2.93	4.2	6.46	7.25676	4.56315e-68						GO:0030246///carbohydrate binding
190838	fbxa-111	NM_074884.1	1	NC_003283.11	16948659	16949674	0.57	0.36	0.55	0.07	0.25	0.03	-2.10956	6.78935e-06
188619	ugt-10	NM_071912.2	1	NC_003283.11	4898217	4900082	0.05	0.05	0.07	0.21	0.45	0.18	2.29098	5.06805e-07	01110///Biosynthesis of secondary metabolites+++00860///Porphyrin and chlorophyll metabolism+++00140///Steroid hormone biosynthesis+++00040///Pentose and glucuronate interconversions+++00980///Metabolism of xenobiotics by cytochrome P450+++01100///Metabolic pathways+++00983///Drug metabolism - other enzymes+++00982///Drug metabolism - cytochrome P450+++00053///Ascorbate and aldarate metabolism+++…	H02055///Gilbert syndrome+++H01593///Osteoporosis+++H00208///Hyperbilirubinemia+++H02054///Crigler-Najjar syndrome+++H02152///Transient familial neonatal hyperbilirubinemia	M00014///Glucuronate pathway (uronate pathway)+++M00129///Ascorbate biosynthesis, animals, glucose-1P => ascorbate	R08262///Morphine + UDP-glucuronate <=> Morphine-3-glucuronide + UDP+++R03091///UDPglucuronate beta-D-glucuronosyltransferase(acceptor-unspecific) Estradiol-17beta + UDP-glucuronate <=> Estradiol-17beta 3-glucuronide + UDP+++R02902///Retinoate + UDP-glucuronate <=> all-trans-Retinoyl-beta-glucuronide + UDP+++R02358///UDPglucuronate beta-D-glucuronosyltransferase(acceptor-unspecific) Estrone + UDP…	GO:0016021///integral component of membrane+++GO:0043231///intracellular membrane-bounded organelle+++GO:0016020///membrane	GO:0016758///transferase activity, transferring hexosyl groups+++GO:0016740///transferase activity+++GO:0008194///UDP-glycosyltransferase activity	GO:0008152///metabolic process
6418649	C45G9.15	NM_001129217.3	1	NC_003281.10	5050171	5051910	3.69	2	2.72	1.45	1.25	1.48	-1.01388	9.32848e-13
188921	T26C12.2	NM_067906.1	1	NC_003282.8	3263851	3265372	0.88	0.37	0.47	1.25	1.08	1.32	1.07978	0.000129276					GO:0016021///integral component of membrane+++GO:0016020///membrane
185531	F40D4.13	NM_001269805.1+++NM_001269806.1	2	NC_003283.11	17156033	17157254	2.99	2.5	2.95	1.26	0.86	0.63	-1.63027	1.45996e-24
190596	Y71G12B.2	NM_058499.3	1	NC_003279.8	1816150	1818496	0.53	0.53	0.82	1.53	1.3	1.85	1.31745	6.37791e-10
182310	C06C6.7	NM_074611.1	1	NC_003283.11	15992206	15995607	3.56	3.01	3.35	1.02	0.82	0.8	-1.91474	3.28721e-104					GO:0016020///membrane+++GO:0016021///integral component of membrane
188433	T12A2.5	NM_065956.1	1	NC_003281.10	6233718	6239336	0	0	0	0.15	0.06	0.03	5.78283	1.98178e-07					GO:0000974///Prp19 complex		GO:0006397///mRNA processing
185955	fbxa-189	NM_074991.1	1	NC_003283.11	17345228	17347709	0.97	1.3	0.88	0	0.02	0.02	-6.61591	1.71845e-46
183903	fbxa-141	NM_078012.2	1	NC_003284.9	14511306	14512910	0.26	0.26	0.73	0.76	1.13	0.81	1.10271	2.36121e-05
191331	ZK488.6	NM_070855.2	1	NC_003283.11	590482	592463	0.12	0	0	0.73	0.46	0.53	3.8205	8.83093e-21	01100///Metabolic pathways+++00513///Various types of N-glycan biosynthesis			R09320///UDP-D-galactose + G10770 <=> UDP + G13057
6418627	F33H12.7	NM_001129138.3	1	NC_003280.10	2586161	2586864	2.4	0.5	2.36	5.45	4.76	8.28	1.81155	3.69059e-23
187851	R13A1.5	NM_068736.3	1	NC_003282.8	7191175	7191809	0.15	0.98	1.19	1.67	1.76	1.93	1.17769	0.000179209
6418626	F26G1.11	NM_001129134.2	1	NC_003280.10	4777205	4777906	2.15	0.95	3.03	4.41	5.12	3.64	1.08149	1.87235e-11					GO:0005615///extracellular space
185954	fbxa-188	NM_074990.2	1	NC_003283.11	17343312	17344902	0.59	0.62	0.99	0.06	0.07	0	-4.10134	1.185e-15
179759	ugt-18	NM_073808.4	1	NC_003283.11	12820333	12822754	0.15	0.12	0.21	1.34	1.13	1.55	3.07857	1.08358e-40	01110///Biosynthesis of secondary metabolites+++00830///Retinol metabolism+++00140///Steroid hormone biosynthesis+++00980///Metabolism of xenobiotics by cytochrome P450+++00040///Pentose and glucuronate interconversions+++01100///Metabolic pathways+++00860///Porphyrin and chlorophyll metabolism+++00983///Drug metabolism - other enzymes+++00053///Ascorbate and aldarate metabolism+++00982///Drug me…	H02152///Transient familial neonatal hyperbilirubinemia+++H00208///Hyperbilirubinemia+++H02055///Gilbert syndrome+++H01593///Osteoporosis+++H02054///Crigler-Najjar syndrome	M00014///Glucuronate pathway (uronate pathway)+++M00129///Ascorbate biosynthesis, animals, glucose-1P => ascorbate	R01383///UDPglucuronate beta-D-glucuronosyltransferase (acceptor-unspecific) UDP-glucuronate + ROH <=> UDP + beta-D-Glucuronoside+++R08259///SN-38 + UDP-glucuronate <=> SN38 glucuronide + UDP+++R09427///4-(Methylnitrosamino)-1-(3-pyridyl)-1-butanol + UDP-glucuronate <=> NNAL-N-glucuronide + UDP+++R04354///UDPglucuronate beta-D-glucuronosyltransferase(acceptor-unspecific) 2-Methoxy-17beta-estradio…	GO:0043231///intracellular membrane-bounded organelle+++GO:0016021///integral component of membrane+++GO:0016020///membrane	GO:0016740///transferase activity+++GO:0008194///UDP-glycosyltransferase activity+++GO:0015020///glucuronosyltransferase activity+++GO:0016757///transferase activity, transferring glycosyl groups+++GO:0016758///transferase activity, transferring hexosyl groups	GO:0008152///metabolic process
189932	Y45G12C.3	NM_071297.3	1	NC_003283.11	2556174	2557415	0.1	0	0.05	1.61	0.85	0.94	4.53044	1.17243e-08	00982///Drug metabolism - cytochrome P450+++00983///Drug metabolism - other enzymes+++00480///Glutathione metabolism+++00980///Metabolism of xenobiotics by cytochrome P450	H00516///Cleft lip and/or cleft palate+++H00024///Prostate cancer		R07113///1,2-dibromoethane:glutathione ethylenetransferase (episulfonium-forming) 1,2-Dibromoethane + Glutathione + H+ <=> Glutathione episulfonium ion + 2 Hydrobromic acid+++R07069///3,4-dihydro-3-hydroxy-4-S-glutathionyl bromobenzene glutathione-lyase (epoxide-forming) Bromobenzene-3,4-oxide + Glutathione <=> 3,4-Dihydro-3-hydroxy-4-S-glutathionyl bromobenzene+++R07023///1-nitro-7-hydroxy-8-glu…		GO:0004364///glutathione transferase activity	GO:0010225///response to UV-C+++GO:0008340///determination of adult lifespan+++GO:0055114///oxidation-reduction process+++GO:0006749///glutathione metabolic process+++GO:0010286///heat acclimation+++GO:0042542///response to hydrogen peroxide
180129	nhr-116	NM_074872.4	1	NC_003283.11	16912241	16915276	1.69	1.3	1.59	0.08	0.09	0.1	-4.07252	2.09466e-47					GO:0005634///nucleus	GO:0003700///DNA-binding transcription factor activity+++GO:0003677///DNA binding+++GO:0043565///sequence-specific DNA binding+++GO:0008270///zinc ion binding+++GO:0046872///metal ion binding	GO:0006355///regulation of transcription, DNA-templated
13223505	C29F7.10	NM_001270292.1	1	NC_003284.9	13430345	13431046	0.35	1.1	0.88	1.75	1.96	1.8	1.21557	2.6507e-07
188571	zig-13	NM_064760.1	1	NC_003281.10	154475	156674	0	0.03	0	0.25	0.17	0.29	4.72838	5.70549e-07	04510///Focal adhesion+++04151///PI3K-Akt signaling pathway+++04066///HIF-1 signaling pathway+++04014///Ras signaling pathway+++04015///Rap1 signaling pathway+++04010///MAPK signaling pathway				GO:0016021///integral component of membrane+++GO:0016020///membrane
3896850	T09D3.8	NM_001038414.1	1	NC_003283.11	5365519	5366662	1.73	0.38	2.1	4.69	3.56	3.65	1.48529	5.37106e-13
182006	B0496.2	NM_068788.1	1	NC_003282.8	7447979	7449169	1.86	0.85	1.63	0.61	0.64	0.64	-1.20652	6.25262e-09
188287	T08E11.1	NM_061689.4	1	NC_003280.10	1836512	1840210	0	0	0	0.17	0.31	0.12	6.42026	7.50942e-11
186960	cbp-2	NM_066800.4	1	NC_003281.10	9923225	9924467	6.6	5.57	7.61	13.57	15.73	15.78	1.17681	1.59547e-72	04520///Adherens junction+++04066///HIF-1 signaling pathway+++04922///Glucagon signaling pathway+++04919///Thyroid hormone signaling pathway+++04916///Melanogenesis+++04350///TGF-beta signaling pathway+++04720///Long-term potentiation+++04024///cAMP signaling pathway+++04068///FoxO signaling pathway+++04110///Cell cycle+++04330///Notch signaling pathway+++04630///Jak-STAT signaling pathway+++0431…	H01613///Follicular lymphoma+++H00504///Rubinstein-Taybi syndrome			GO:0005634///nucleus	GO:0008270///zinc ion binding+++GO:0046872///metal ion binding+++GO:0003712///transcription coregulator activity+++GO:0004402///histone acetyltransferase activity	GO:0016573///histone acetylation+++GO:0006355///regulation of transcription, DNA-templated
3565869	H32K16.2	NM_001026361.1	1	NC_003279.8	9154365	9154705	4.73	7.66	4.47	1.39	3.28	3.21	-1.20154	0.000228168
188369	T10B11.4	NM_059577.2	1	NC_003279.8	6937504	6939618	0.28	0.93	0.44	1.13	1.23	1.37	1.15532	1.04594e-07
3565941	try-9	NM_001026720.1	1	NC_003280.10	4368490	4369618	0.21	0.17	0.18	0.83	0.9	0.86	2.19787	1.47402e-09						GO:0008233///peptidase activity+++GO:0004252///serine-type endopeptidase activity	GO:0006508///proteolysis
178461	fip-7	NM_070566.4	1	NC_003282.8	16626228	16626458	0	0	0	0.71	3.91	2.52	5.33756	1.04926e-05
186862	K02A6.2	NM_076986.2	1	NC_003284.9	8224391	8224902	0.88	1.37	1.38	0.17	0.53	0.39	-1.79518	3.88131e-05
187598	R05A10.8	NM_070313.3	1	NC_003282.8	14155270	14158048	0	0	0	0.36	0.15	0.21	5.34987	9.53726e-06					GO:0016021///integral component of membrane+++GO:0016020///membrane
186353	F56A4.10	NM_001316810.1+++NM_001316811.1	2	NC_003283.11	2461320	2464579	0.7	1.04	1.94	3.99	4.5	5.09	1.8856	3.13925e-67					GO:0016020///membrane+++GO:0016021///integral component of membrane		GO:0055085///transmembrane transport
187025	cyp-33D1	NM_074675.1	1	NC_003283.11	16173827	16175820	0.09	0.18	0.17	0.72	0.81	0.82	2.39718	2.58088e-17						GO:0016705///oxidoreductase activity, acting on paired donors, with incorporation or reduction of molecular oxygen+++GO:0005506///iron ion binding+++GO:0008395///steroid hydroxylase activity+++GO:0020037///heme binding
178049	his-48	NM_069731.4	1	NC_003282.8	11324745	11325116	920.42	993.03	737.54	307.45	237.45	358.66	-1.59064	0					GO:0000786///nucleosome+++GO:0005694///chromosome+++GO:0005634///nucleus	GO:0046982///protein heterodimerization activity+++GO:0003677///DNA binding+++GO:0044877///protein-containing complex binding	GO:0006334///nucleosome assembly
187359	M01B2.8	NM_074377.1	1	NC_003283.11	15260238	15260786	0.84	0.44	0.78	1.19	1.92	1.87	1.25034	0.00021829
188845	T24C4.4	NM_064881.6	1	NC_003281.10	872666	873476	1.75	2.87	3.19	6.89	8.46	7.36	1.50188	4.1328e-22					GO:0016020///membrane+++GO:0016021///integral component of membrane		GO:0045087///innate immune response
191395	srg-64	BGIR6239_30000+++NM_078188.2	2	NC_003284.9	15736844	15740626	2.41	5	2.43	7.56	5.02	8.75	1.04809	3.01987e-06					GO:0016021///integral component of membrane+++GO:0016020///membrane	GO:0004888///transmembrane signaling receptor activity	GO:0007606///sensory perception of chemical stimulus
174502	chil-21	NM_063628.2	1	NC_003280.10	9460128	9461972	0.37	0.17	0.27	0.53	0.43	0.66	1.00032	0.000454841					GO:0016021///integral component of membrane+++GO:0016020///membrane	GO:0008061///chitin binding	GO:0005975///carbohydrate metabolic process
177782	gadr-2	NM_069273.1	1	NC_003282.8	9482070	9485083	0.01	0.01	0.02	0.15	0.15	0.19	3.34987	2.03044e-08					GO:0031462///Cul2-RING ubiquitin ligase complex	GO:0004842///ubiquitin-protein transferase activity	GO:0016567///protein ubiquitination+++GO:0051438///regulation of ubiquitin-protein transferase activity
182329	C06E4.6	NM_068753.3	1	NC_003282.8	7257217	7258215	0.5	0.14	0.69	0.11	0.08	0.07	-2.37415	9.316e-06						GO:0016491///oxidoreductase activity	GO:0055114///oxidation-reduction process
186068	F49F1.12	NM_068092.2	1	NC_003282.8	4141743	4143019	16.86	11.84	15.36	4.62	3.88	3.62	-1.88869	5.25058e-72					GO:0016020///membrane+++GO:0016021///integral component of membrane
185281	clec-137	NM_062413.1	1	NC_003280.10	4617219	4618090	0	0	0	2.59	3.07	5.28	9.00522	2.63367e-48						GO:0030246///carbohydrate binding
178876	cwp-1	NM_071893.3	1	NC_003283.11	4840667	4841265	0	0	0	0.26	0.55	1.67	5.34987	9.53726e-06
180145	F31E9.6	BGIR6239_29866+++NM_074981.3	2	NC_003283.11	17313607	17315978	0.77	1.23	0.85	0	0	0	-7.44779	3.03054e-20
182435	chil-5	NM_063726.1	1	NC_003280.10	9858110	9859631	0.02	0.02	0	0.16	0.13	0.08	3.19787	0.000317589					GO:0016021///integral component of membrane+++GO:0016020///membrane	GO:0008061///chitin binding	GO:0005975///carbohydrate metabolic process
174929	clec-66	NM_064345.4	1	NC_003280.10	12904419	12906545	20.62	13.77	22.44	41.51	48.6	41.98	1.20618	6.50463e-275						GO:0030246///carbohydrate binding	GO:0045087///innate immune response
190747	Y81G3A.1	NM_064379.1	1	NC_003280.10	13082504	13083676	9.91	8.09	11.54	1.5	2.71	3.68	-1.91182	1.45421e-70
184944	fkh-5	NM_065602.2	1	NC_003281.10	4844662	4846546	0.1	0.04	0.22	0.26	0.38	0.39	1.53044	9.98281e-05					GO:0005634///nucleus	GO:0043565///sequence-specific DNA binding+++GO:0003700///DNA-binding transcription factor activity+++GO:0003677///DNA binding+++GO:0000977///RNA polymerase II regulatory region sequence-specific DNA binding	GO:0006355///regulation of transcription, DNA-templated
187219	K09E3.2	NM_078371.1	1	NC_003284.9	17117659	17117988	1.8	2.73	2.34	1.15	1.08	0.94	-1.1807	0.000874511
185282	clec-138	NM_062414.1	1	NC_003280.10	4618928	4619800	0	0	0	1.21	1.71	2.27	7.8353	7.01277e-25						GO:0030246///carbohydrate binding
13224091	H40L08.2	NM_001270323.1+++NM_001270324.1	2	NC_003284.9	15076878	15077312	19.47	17.4	19.53	7.86	8.53	7.38	-1.30347	1.69889e-26
181465	fkh-3	NM_001307893.1+++NM_001307894.1	2	NC_003284.9	13421932	13423427	0.29	0.33	0.12	0.92	1.27	0.63	1.88473	7.04857e-13					GO:0005634///nucleus	GO:0043565///sequence-specific DNA binding+++GO:0000977///RNA polymerase II regulatory region sequence-specific DNA binding+++GO:0003677///DNA binding+++GO:0003700///DNA-binding transcription factor activity	GO:0006355///regulation of transcription, DNA-templated
187871	clec-158	NM_066090.1	1	NC_003281.10	6858793	6859571	0.05	0	0.15	2.83	4.08	4.73	5.87969	1.27538e-55
179134	try-8	NM_072515.1	1	NC_003283.11	7452946	7454318	0	0.02	0	3.61	5.3	6.86	9.40732	7.8913e-120						GO:0004252///serine-type endopeptidase activity+++GO:0008233///peptidase activity+++GO:0016812///hydrolase activity, acting on carbon-nitrogen (but not peptide) bonds, in cyclic amides	GO:0006508///proteolysis
179079	odc-1	NM_072351.6	1	NC_003283.11	6898584	6899956	48.45	18.73	51.19	76.61	80.23	84.97	1.0262	0	01100///Metabolic pathways+++00330///Arginine and proline metabolism+++00480///Glutathione metabolism+++01110///Biosynthesis of secondary metabolites+++01130///Biosynthesis of antibiotics		M00134///Polyamine biosynthesis, arginine => ornithine => putrescine	R00670///L-ornithine carboxy-lyase (putrescine-forming) L-Ornithine <=> Putrescine + CO2	GO:0005737///cytoplasm	GO:0003824///catalytic activity+++GO:0016829///lyase activity+++GO:0016831///carboxy-lyase activity+++GO:0004586///ornithine decarboxylase activity	GO:0033387///putrescine biosynthetic process from ornithine+++GO:0006596///polyamine biosynthetic process
172987	C35E7.9	NM_060423.3	1	NC_003279.8	10807064	10808224	2.26	3.21	1.73	1.25	1	1.2	-1.07799	2.44085e-10					GO:0005856///cytoskeleton
184190	ced-8	BGIR6239_30064+++NM_077026.6	2	NC_003284.9	8414100	8422052	0.14	0.34	0.24	0.68	0.68	0.46	1.31745	4.03859e-06					GO:0005886///plasma membrane+++GO:0016020///membrane+++GO:0016021///integral component of membrane	GO:0003674///molecular_function	GO:0006915///apoptotic process+++GO:0043652///engulfment of apoptotic cell+++GO:0012501///programmed cell death+++GO:1902742///apoptotic process involved in development+++GO:0097194///execution phase of apoptosis+++GO:0070782///phosphatidylserine exposure on apoptotic cell surface+++GO:0009792///embryo development ending in birth or egg hatching
3896802	Y54G2A.45	NM_001038356.4+++NM_001307334.1+++NM_001307335.1	3	NC_003282.8	2805873	2808987	21.02	9.28	26.81	2.05	2.44	3.59	-2.81848	0						GO:0016787///hydrolase activity	GO:0006629///lipid metabolic process
6418620	fbxc-43	NM_001129115.1	1	NC_003280.10	4234950	4235982	4.86	3.17	4.01	1.77	1.55	1.77	-1.25457	5.28161e-19
186628	F59E12.3	NM_062698.3	1	NC_003280.10	5638386	5638904	3.08	2.62	2.45	0.86	1.37	1.38	-1.2091	6.08009e-06		H00063///Spinocerebellar ataxia (SCA)			GO:0005634///nucleus+++GO:0005737///cytoplasm	GO:0004674///protein serine/threonine kinase activity	GO:0006270///DNA replication initiation+++GO:0000727///double-strand break repair via break-induced replication+++GO:0018105///peptidyl-serine phosphorylation+++GO:0018107///peptidyl-threonine phosphorylation
3565312	Y49F6B.13	NM_001027287.5	1	NC_003280.10	3471239	3471703	0	0	0	0.84	0.4	1.01	5.93483	3.94122e-08
178009	M7.9	NM_069671.3	1	NC_003282.8	11100701	11101478	0	0	0	5.88	7.8	10.19	9.5198	3.26136e-64
36312795	Y46B2A.4	NM_001361846.1	1	NC_003280.10	861898	862328	3.45	2.58	4.21	7.71	8.29	5.41	1.01373	1.04889e-08					GO:0016021///integral component of membrane+++GO:0016020///membrane
4362997	K02B12.9	NM_001047208.1	1	NC_003279.8	8520938	8521909	0.54	0.51	0.11	2.47	2.51	2.61	2.65598	4.64859e-11
186923	nas-17	NM_073491.1	1	NC_003283.11	11398916	11400528	0	0	0	0.95	1.18	1.62	8.51176	1.27154e-36					GO:0005576///extracellular region	GO:0004222///metalloendopeptidase activity+++GO:0046872///metal ion binding+++GO:0008270///zinc ion binding+++GO:0008237///metallopeptidase activity+++GO:0008233///peptidase activity+++GO:0016787///hydrolase activity	GO:0018996///molting cycle, collagen and cuticulin-based cuticle+++GO:0006508///proteolysis
184862	F22F7.3	NM_071173.3	1	NC_003283.11	2110741	2114488	0.08	0.13	0.33	0.74	0.55	1.08	2.14689	5.35005e-17					GO:0016021///integral component of membrane+++GO:0016020///membrane	GO:0016757///transferase activity, transferring glycosyl groups
188525	lgc-54	NM_001356670.1	1	NC_003283.11	6840286	6846590	1.5	0.53	1.84	2.84	3.41	2.1	1.09866	5.14432e-20					GO:0016020///membrane+++GO:0005886///plasma membrane+++GO:0043005///neuron projection+++GO:0016021///integral component of membrane+++GO:0045202///synapse+++GO:0005887///integral component of plasma membrane	GO:0005216///ion channel activity+++GO:0004888///transmembrane signaling receptor activity+++GO:0005230///extracellular ligand-gated ion channel activity+++GO:0005254///chloride channel activity	GO:0050877///nervous system process+++GO:1902476///chloride transmembrane transport+++GO:0034220///ion transmembrane transport+++GO:0007165///signal transduction+++GO:0007268///chemical synaptic transmission+++GO:0006811///ion transport+++GO:0042391///regulation of membrane potential
180142	T19C9.8	NM_074966.2	1	NC_003283.11	17239105	17240656	0.83	0.3	1.86	0.13	0.16	0	-3.38299	2.39173e-22
186578	F59A3.7	NM_059217.2	1	NC_003279.8	5517369	5518563	0.63	0.39	0.75	1.18	1.92	1.57	1.37753	6.34878e-06					GO:0016021///integral component of membrane+++GO:0016020///membrane
13221059	K10C2.14	NM_001270114.1	1	NC_003284.9	6439927	6440550	0.65	0.81	0.76	2.36	3.58	1.25	1.61291	5.83108e-06
172808	T05F1.5	NM_060158.5	1	NC_003279.8	9633238	9634847	36.92	35.1	38.61	15.83	14.17	17.97	-1.21227	7.12625e-216
188558	T16H12.1	NM_001268133.1+++NM_001268134.1	2	NC_003281.10	10083462	10085057	3.04	2.58	2.65	11.82	13.38	12.32	2.16716	5.20603e-158
182422	C08F11.7	NM_070231.3	1	NC_003282.8	13637702	13638525	1.61	1.49	1.6	0.43	0.9	0.55	-1.35908	4.23363e-07
189488	Y19D10A.11	NM_001316828.1+++NM_001316829.1	2	NC_003283.11	2368944	2373385	0.57	0.46	0.8	1.89	2.07	2.02	1.89755	5.60798e-30					GO:0016021///integral component of membrane		GO:0055085///transmembrane transport
185361	F36F12.2	NM_071166.2	1	NC_003283.11	2091753	2095282	0	0	0	0.75	0.99	0.66	8.15723	6.18165e-30					GO:0016021///integral component of membrane+++GO:0016020///membrane	GO:0016757///transferase activity, transferring glycosyl groups
191213	clec-96	NM_060468.1	1	NC_003279.8	11151241	11151939	0	0	0	1.86	3.23	4.53	8.41165	1.32888e-34						GO:0030246///carbohydrate binding
176942	W09G12.6	NM_067657.1	1	NC_003282.8	1231897	1232812	0	0	0	0.31	0.59	1.31	6.19787	1.6564e-09
184155	F07G6.8	NM_075915.1	1	NC_003284.9	1720093	1720428	0	0	0	0.34	1.84	1.72	5.55151	1.77571e-06
182659	math-15	NM_061700.2	1	NC_003280.10	1866392	1867783	0.42	0.03	0.43	0.77	0.98	0.81	1.52098	1.71724e-06
181822	B0041.1	NM_059021.2	1	NC_003279.8	4664871	4665310	3.99	2.8	3.7	1.04	2.21	1.18	-1.30909	2.0047e-06
191450	ZK896.4	NM_070053.1	1	NC_003282.8	12880667	12883146	2.91	2.82	3.29	7.47	7.37	6.7	1.24647	3.90286e-60
173025	pes-2.1	NM_060508.3	1	NC_003279.8	11355236	11356370	0.17	0.18	0.1	1.18	1.27	1.35	3.03917	8.13782e-23
185829	F46B3.1	NM_075572.1	1	NC_003283.11	20596213	20597176	0.06	0	0	0.3	0.44	0.51	4.42026	1.0707e-05
184595	F16H6.8	NM_075162.2	1	NC_003283.11	18213677	18216275	0	0	0	0.13	0.17	0.12	5.32146	1.1882e-05
181920	sra-33	NM_062401.5	1	NC_003280.10	4534750	4537241	0.26	0.11	0.15	0.03	0.03	0	-3.14198	0.000410202					GO:0016020///membrane+++GO:0016021///integral component of membrane	GO:0004930///G protein-coupled receptor activity+++GO:0004984///olfactory receptor activity	GO:0050911///detection of chemical stimulus involved in sensory perception of smell+++GO:0007186///G protein-coupled receptor signaling pathway+++GO:0007606///sensory perception of chemical stimulus+++GO:0050907///detection of chemical stimulus involved in sensory perception
188832	grl-28	NM_071594.1	1	NC_003283.11	3551346	3551865	0	0.4	0.43	5.29	5.41	3.15	3.99142	1.05325e-33
183899	D1022.2	NM_063162.1	1	NC_003280.10	7459536	7460026	0	0	0	0.8	1.69	1.95	6.5198	1.64373e-11
177261	Y9C9A.8	NM_068275.3	1	NC_003282.8	4930397	4932217	0.62	0.42	1.38	2.13	2.66	2.14	1.51146	1.8837e-22
184987	clec-263	NM_075570.4	1	NC_003283.11	20574625	20577598	0	0.01	0	0.09	0.06	0.26	4.8353	1.79187e-07						GO:0030246///carbohydrate binding
182603	C14C6.6	NM_070840.2	1	NC_003283.11	545844	548048	0.31	0	0.33	1.33	2.24	1.63	3.00832	6.91436e-50
191124	ZC239.14	NM_062078.2	1	NC_003280.10	3221198	3222010	0.46	0.27	0.42	1.09	0.79	0.86	1.24207	0.000435195							GO:0051260///protein homooligomerization
189988	Y47D7A.12	NM_071824.3	1	NC_003283.11	4429000	4429648	0	0.26	0	0.49	1.14	1.56	3.58866	1.5944e-12
3565725	dsl-7	NM_001028632.1	1	NC_003283.11	12993626	12994622	0.91	0.54	1.25	1.67	2.39	1.48	1.01972	9.49892e-08					GO:0005887///integral component of plasma membrane+++GO:0016020///membrane+++GO:0016021///integral component of membrane		GO:0007275///multicellular organism development+++GO:0001708///cell fate specification+++GO:0007154///cell communication
3565041	C50F4.6	NM_073064.6	1	NC_003283.11	9546416	9546746	11.41	5.59	8.9	4.55	4.68	3.99	-1.02583	2.86063e-07
174896	Y38E10A.14	NM_064296.4	1	NC_003280.10	12623289	12623940	1.77	2.15	1.8	0.14	0.14	0	-4.43856	3.56533e-20
184056	F01D5.2	NM_064532.1	1	NC_003280.10	13998497	13998949	1.9	5.23	2.75	8.37	8.76	6.43	1.18637	2.88203e-13
189984	Y47D7A.7	NM_071817.1	1	NC_003283.11	4419454	4419867	0.31	0.39	0	0.97	1.8	1.01	2.33745	1.81189e-05
189948	clec-74	NM_068045.2	1	NC_003282.8	3957030	3960139	0.04	0.12	0.1	1.1	1.33	1.03	3.75377	1.25386e-35						GO:0030246///carbohydrate binding	GO:0045087///innate immune response
187152	scrm-8	NM_068100.4	1	NC_003282.8	4164779	4166176	14.68	11.49	14.75	3.66	4.05	4.81	-1.71758	4.53887e-108					GO:0016020///membrane	GO:0005515///protein binding+++GO:0017128///phospholipid scramblase activity	GO:0017121///phospholipid scrambling
179776	T16G1.4	NM_073835.4	1	NC_003283.11	12940212	12941784	5.49	4.08	7.65	1.63	1.71	1.49	-1.84105	9.3036e-74
178249	K10D11.6	NM_070088.3	1	NC_003282.8	12986831	12989365	0.77	1.29	1.53	2.34	2.58	3	1.13661	1.54457e-20
4363088	fbxa-143	NM_001047653.2	1	NC_003283.11	16125863	16127494	0.33	0.2	0.36	0.42	1	0.68	1.22059	3.86906e-05
6418607	Y26D4A.21	NM_001129064.2	1	NC_003279.8	13101357	13101890	1.29	0.76	1.6	2.46	2.67	2.53	1.04202	3.9326e-05
190283	fbxc-45	NM_067870.2	1	NC_003282.8	2919863	2922229	16.98	16.54	17.35	8.48	7.89	7.34	-1.11557	1.48104e-80
184428	F13E9.10	NM_069621.1	1	NC_003282.8	10885238	10886015	0	0	0	0.5	0.96	1.09	6.8353	7.08044e-14
173178	hpo-2	NM_060884.3	1	NC_003279.8	13066967	13069010	0.02	0.1	0.14	0.84	1.04	1.32	3.66021	8.8991e-38
189342	clec-133	NM_062185.1	1	NC_003280.10	3578421	3579031	0	0	0	1.56	1.63	2.64	7.53574	6.40053e-21						GO:0030246///carbohydrate binding
182318	C06E1.11	NM_066495.1	1	NC_003281.10	8614762	8616210	0.93	0.77	0.59	3.48	2.48	3.23	1.99182	4.66878e-38
183347	col-132	NM_070113.1	1	NC_003282.8	13089643	13091067	0.28	0.14	0.4	0.51	0.95	0.88	1.50438	1.48292e-05					GO:0005581///collagen trimer+++GO:0016020///membrane+++GO:0016021///integral component of membrane	GO:0042302///structural constituent of cuticle
180135	T05E12.3	NM_074923.4	1	NC_003283.11	17076915	17077949	3.05	4.56	4.2	1.25	1.46	1.42	-1.53415	2.75318e-23							GO:0051260///protein homooligomerization
184700	F19H6.6	NM_077674.1	1	NC_003284.9	12362461	12363102	0	0	0	0.49	0.45	0.58	5.6718	5.88767e-07
3565232	mai-1	NM_076135.4	1	NC_003284.9	3114997	3115565	3.47	2.21	3.49	0.73	1.36	1.49	-1.40502	0.000208097					GO:0005737///cytoplasm+++GO:0005739///mitochondrion	GO:0051117///ATPase binding+++GO:0042030///ATPase inhibitor activity	GO:0032780///negative regulation of ATPase activity+++GO:0006783///heme biosynthetic process
182056	mct-2	NM_001316782.1+++NM_001316783.1+++NM_001316784.1+++NM_071280.2	4	NC_003283.11	2483004	2487785	53.3	56.44	44.84	139.8	129.12	131.07	1.36231	0					GO:0016021///integral component of membrane+++GO:0016020///membrane	GO:0008028///monocarboxylic acid transmembrane transporter activity	GO:0055085///transmembrane transport+++GO:0015718///monocarboxylic acid transport
259738	ctl-1	NM_064578.4	1	NC_003280.10	14303621	14306253	38.56	28.49	38.99	7.14	9.25	6.36	-2.23467	0	00630///Glyoxylate and dicarboxylate metabolism+++01200///Carbon metabolism+++01110///Biosynthesis of secondary metabolites+++04011///MAPK signaling pathway - yeast+++00380///Tryptophan metabolism+++04213///Longevity regulating pathway - multiple species+++01130///Biosynthesis of antibiotics+++04016///MAPK signaling pathway - plant+++04146///Peroxisome+++04211///Longevity regulating pathway+++040…	H00203///Acatalasemia	M00532///Photorespiration	R00009///hydrogen-peroxide:hydrogen-peroxide oxidoreductase 2 Hydrogen peroxide <=> Oxygen + 2 H2O+++R02670///2 3-Hydroxyanthranilate + 4 Oxygen <=> Cinnavalininate + 2 O2.- + 2 Hydrogen peroxide + 2 H++++R00602///methanol:hydrogen-peroxide oxidoreductase Methanol + Hydrogen peroxide <=> Formaldehyde + 2 H2O	GO:0005777///peroxisome+++GO:0005737///cytoplasm	GO:0046872///metal ion binding+++GO:0016491///oxidoreductase activity+++GO:0004601///peroxidase activity+++GO:0004096///catalase activity+++GO:0020037///heme binding	GO:0042744///hydrogen peroxide catabolic process+++GO:0055114///oxidation-reduction process+++GO:0098869///cellular oxidant detoxification+++GO:0042542///response to hydrogen peroxide+++GO:0006979///response to oxidative stress
185466	F38E1.10	NM_072757.1	1	NC_003283.11	8374027	8375474	0.06	0.03	0	0.17	0.52	0.42	3.48738	2.47455e-07
184099	scl-15	NM_062095.4	1	NC_003280.10	3283691	3284657	0	0	0	1.19	1.63	2.62	7.75586	9.14784e-24					GO:0005615///extracellular space
3564795	nspc-5	NM_001029178.1	1	NC_003284.9	8538740	8539090	0.93	6.61	0.87	0.35	0	0	-4.72472	1.527e-15
185225	F33D11.2	NM_059295.2	1	NC_003279.8	5847611	5849391	6.84	6.79	8.77	3.26	3.97	3.68	-1.0497	2.33408e-36
185562	F40G12.2	NM_074128.2	1	NC_003283.11	14259544	14260931	0	0.11	0.08	0.31	0.52	0.18	2.40646	0.000180965
182737	clec-124	NM_001356828.1	1	NC_003280.10	3249723	3250767	0	0	0.06	0.84	1	1.31	5.75586	1.45844e-13						GO:0030246///carbohydrate binding
186015	F49C5.4	NM_064278.3	1	NC_003280.10	12535760	12542415	0.52	0.41	0.4	0.13	0.31	0.16	-1.18151	0.00014391					GO:0005737///cytoplasm+++GO:0005634///nucleus+++GO:0031588///nucleotide-activated protein kinase complex	GO:0004672///protein kinase activity+++GO:0004674///protein serine/threonine kinase activity+++GO:0005524///ATP binding	GO:0042149///cellular response to glucose starvation+++GO:0035556///intracellular signal transduction+++GO:0032007///negative regulation of TOR signaling+++GO:0006468///protein phosphorylation
189630	Y37H2A.7	NM_075138.3	1	NC_003283.11	18133300	18134478	2.48	1.97	2.38	7.21	6.53	6.28	1.53566	1.34061e-44
24105070	Y38C1AA.19	NM_001307380.1	1	NC_003282.8	160164	161663	0.08	0.07	0	0.32	0.59	0.45	3.11541	0.000564723
181588	pag-3	BGIR6239_29994+++NM_078079.3	2	NC_003284.9	14951200	14954521	9.62	8.98	7.66	20.05	27.88	30.28	1.33741	3.19257e-28		H00100///Neutropenic disorders+++H01740///Macrothrombocytopenia			GO:0005634///nucleus	GO:0003676///nucleic acid binding+++GO:0003714///transcription corepressor activity	GO:0006355///regulation of transcription, DNA-templated+++GO:0045664///regulation of neuron differentiation+++GO:0014018///neuroblast fate specification+++GO:0046676///negative regulation of insulin secretion+++GO:0043066///negative regulation of apoptotic process+++GO:0000122///negative regulation of transcription by RNA polymerase II+++GO:0046929///negative regulation of neurotransmitter secret…
181826	bath-24	NM_061762.1	1	NC_003280.10	2044702	2045585	6.98	6.64	7.13	3.55	2.94	3.27	-1.1044	1.67947e-22							GO:0016567///protein ubiquitination
185503	oac-24	NM_071866.3	1	NC_003283.11	4710928	4714911	0.16	0.03	0.31	0.48	0.84	0.35	1.74066	2.69999e-11					GO:0016020///membrane+++GO:0016021///integral component of membrane	GO:0016746///transferase activity, transferring acyl groups+++GO:0016740///transferase activity+++GO:0016747///transferase activity, transferring acyl groups other than amino-acyl groups	GO:0033692///cellular polysaccharide biosynthetic process
178239	ZK896.5	NM_070052.3	1	NC_003282.8	12877004	12879630	2.95	2.92	4.81	8.4	6.2	7.5	1.04694	6.80242e-47
4927054	fipr-27	NM_001083267.1	1	NC_003282.8	16630922	16631206	1.89	0.38	2.1	4.65	7.82	5.38	1.9785	1.94832e-09
13198301	K01A6.7	NM_001268656.1	1	NC_003282.8	11738247	11738567	2.17	1.18	2.06	2.53	3.83	4.79	1.01107	0.000301244
6418710	C49G7.12	NM_001129413.3+++NM_001330825.1	2	NC_003283.11	4038828	4039869	0.84	1.49	0.97	2.06	2	2.94	1.07145	1.96988e-09
186355	F56A4.12	NM_001316812.1+++NM_001316813.1	2	NC_003283.11	2476905	2481346	0.57	0.46	0.8	1.89	2.07	2.02	1.89755	5.60798e-30					GO:0016020///membrane+++GO:0016021///integral component of membrane		GO:0055085///transmembrane transport
173154	clec-106	NM_060849.1	1	NC_003279.8	12866120	12866896	0.09	0.13	0.05	0.74	0.72	0.83	3.08684	1.29547e-09						GO:0030246///carbohydrate binding
171667	Y18H1A.8	NM_001306248.1+++NM_058376.2	2	NC_003279.8	758756	760429	2.34	0.72	2	3.38	3.4	3.33	1.13228	6.59083e-07
174717	T06D8.10	NM_064006.4	1	NC_003280.10	11241068	11247506	17.84	1.65	20.17	27.14	29.66	26.88	1.0775	0		H01159///Anterior segment dysgenesis (ASGD)				GO:0004601///peroxidase activity+++GO:0020037///heme binding	GO:0098869///cellular oxidant detoxification+++GO:0006979///response to oxidative stress+++GO:0055114///oxidation-reduction process
13190077	F37C12.21	NM_001268015.1	1	NC_003281.10	7188357	7188951	0.33	0.38	0.27	0.75	1.51	1.55	1.92841	1.20074e-06
171808	Y74C10AR.2	NM_058586.5	1	NC_003279.8	2483203	2483652	0.08	0	0	2.8	4.39	8.74	7.69328	8.10204e-45
189943	clec-174	NM_068040.2	1	NC_003282.8	3940259	3941702	0.18	0.08	0.1	0.43	0.21	0.48	1.63938	1.94518e-05						GO:0030246///carbohydrate binding	GO:0045087///innate immune response
191101	ZC196.2	NM_072850.2	1	NC_003283.11	8739437	8742259	0.19	0.11	0.17	0.45	0.29	0.62	1.55519	0.000114803	04979///Cholesterol metabolism	H00455///Spinal muscular atrophy (SMA)+++H00058///Amyotrophic lateral sclerosis (ALS)			GO:0005789///endoplasmic reticulum membrane+++GO:0005856///cytoskeleton
187065	frpr-11	NM_001356715.1	1	NC_003283.11	8907280	8909393	0.6	0.45	1.01	1.3	1.97	1.2	1.10595	1.60447e-08					GO:0016021///integral component of membrane+++GO:0016020///membrane	GO:0004930///G protein-coupled receptor activity	GO:0007165///signal transduction+++GO:0007186///G protein-coupled receptor signaling pathway
3565060	F56G4.7	NM_001026339.1	1	NC_003279.8	11361147	11362900	2.54	1.96	2.07	0.86	0.35	1.31	-1.38709	2.06012e-07
189831	Y41E3.6	NM_070409.5	1	NC_003282.8	15006794	15007135	0.81	0.58	1.57	0.36	0.26	0.13	-2.03487	0.000950729
6418634	T10D4.15	NM_001129163.2	1	NC_003280.10	3146152	3146765	0.41	0.67	0.1	2.11	3.02	3.84	2.86925	8.96824e-15
190029	fbxc-23	NM_064454.2	1	NC_003280.10	13595061	13596543	0.59	0.1	0.6	1.39	1.27	0.91	1.45679	4.24209e-08
3564926	F26C11.4	NM_001026944.1	1	NC_003280.10	9915438	9916270	0	0	0	1.02	0.86	0.95	5.8353	1.15358e-07
4927067	C46C2.7	NM_001083198.4	1	NC_003282.8	9195631	9195898	7.57	12	10.9	4.99	3.21	4.68	-1.32095	1.03834e-08
172341	ZC328.5	NM_059444.1	1	NC_003279.8	6405882	6406936	0.06	0	0.23	0.52	0.3	0.65	2.40646	0.000180965
182421	fbxa-98	NM_001276881.1+++NM_070230.3	2	NC_003282.8	13633499	13635142	0.98	0.87	1.99	3.05	3.29	3.2	1.30533	2.97893e-18
183998	E02H9.1	NM_065163.1	1	NC_003281.10	2468486	2469443	0.08	0	0.16	0.72	0.25	1.05	3.14342	1.40673e-05
189796	Y40C7B.4	NM_078397.1	1	NC_003284.9	17256235	17256780	0.34	0.33	0.21	1.06	1.71	1.27	2.16039	1.20382e-07
185695	F43C11.1	NM_001267122.1+++NM_001267123.1	2	NC_003280.10	2357095	2358278	0	0	0	0.69	0.59	0.77	6.07234	7.98868e-09
186868	K02B12.2	NM_059905.3	1	NC_003279.8	8511708	8512351	0	0	0	0.33	0.23	0.16	4.72838	0.000537944
176520	cut-6	NM_066999.5	1	NC_003281.10	10911499	10916567	0.62	0.11	0.74	1.63	1.1	1.89	1.65871	2.09429e-24					GO:0016020///membrane+++GO:0016021///integral component of membrane+++GO:0060111///alae of collagen and cuticulin-based cuticle extracellular matrix
186883	K02E2.8	NM_001129497.2+++NM_075523.4	2	NC_003283.11	20365806	20366932	5.96	0.36	5.22	7.18	8.02	8.16	1.01344	4.78652e-16
187070	K06H6.1	NM_070854.1	1	NC_003283.11	588135	589646	0.63	0.05	0.7	6.02	8.42	8.38	4.04518	3.05231e-179					GO:0016021///integral component of membrane+++GO:0016020///membrane
177809	C28D4.5	NM_069335.4	1	NC_003282.8	9745611	9746807	20.58	16.37	22.29	8.42	9.52	6.83	-1.27421	3.0355e-120
185824	F46A8.8	NM_060480.2	1	NC_003279.8	11235882	11236707	0	0	0	0.26	0.23	0.8	5.93483	3.94122e-08						GO:0030246///carbohydrate binding
182405	C08E3.13	NM_061617.5	1	NC_003280.10	1632028	1632311	1.07	0.19	0.65	2.26	3.39	3.25	2.17995	9.93649e-06
186462	fbxa-192	BGIR6239_29868+++NM_075064.2	2	NC_003283.11	17640728	17650522	19.73	19.77	20.78	2.33	2.27	2.38	-3.1189	0
189311	W09C3.3	NM_059027.3	1	NC_003279.8	4706764	4708762	0	0.1	0.03	0.27	0.49	0.26	2.93483	6.01953e-06
3564924	nspb-9	NM_001026733.1	1	NC_003280.10	14580917	14581198	7.76	7.16	8.84	27.39	16.34	20.05	1.35725	9.0131e-19
175166	gst-27	BGIR6239_29168+++NM_064715.6	2	NC_003280.10	15164940	15167392	50.56	43.65	59.78	10.96	15.91	11.08	-2.04913	0	00982///Drug metabolism - cytochrome P450+++00980///Metabolism of xenobiotics by cytochrome P450+++00480///Glutathione metabolism+++00983///Drug metabolism - other enzymes	H00516///Cleft lip and/or cleft palate+++H00024///Prostate cancer		R08280///4-glutathionyl cyclophosphamide hydrolase Aldophosphamide + Glutathione <=> 4-Glutathionyl cyclophosphamide + H2O+++R09409///glutathione-S-transferase Aflatoxin B1-exo-8,9-epoxide + Glutathione <=> Aflatoxin B1exo-8,9-epoxide-GSH+++R07113///1,2-dibromoethane:glutathione ethylenetransferase (episulfonium-forming) 1,2-Dibromoethane + Glutathione + H+ <=> Glutathione episulfonium ion + 2 Hy…		GO:0016740///transferase activity
13183688	ZC204.17	NM_001267105.1	1	NC_003280.10	1645459	1646272	0	0	0	0.56	0.78	0.62	6.42026	7.50942e-11
187073	K06H6.4	NM_070850.3	1	NC_003283.11	579283	581372	0	0	0.06	0.28	0.58	0.22	4.27587	1.87746e-13					GO:0016021///integral component of membrane+++GO:0016020///membrane
188362	cyp-13A7	NM_063713.1	1	NC_003280.10	9803620	9805447	0.26	0.24	0.36	0.05	0.04	0.14	-1.88633	1.03741e-05					GO:0016021///integral component of membrane	GO:0020037///heme binding+++GO:0016705///oxidoreductase activity, acting on paired donors, with incorporation or reduction of molecular oxygen+++GO:0005506///iron ion binding+++GO:0046872///metal ion binding+++GO:0016491///oxidoreductase activity+++GO:0004497///monooxygenase activity	GO:0055114///oxidation-reduction process
185821	F46A8.5	NM_060482.1	1	NC_003279.8	11239716	11240473	0	0	0	1.6	3.2	4.12	8.55933	1.27672e-37						GO:0030246///carbohydrate binding
190971	fbxa-113	NM_075497.1	1	NC_003283.11	20203422	20204503	0.09	0.15	0.19	0.74	1	0.65	2.43004	6.53747e-11
181609	T10B10.9	NM_078118.4	1	NC_003284.9	15164408	15164788	0	0.24	0	2.39	2.55	4.3	5.17769	1.27012e-17
182749	pals-6	NM_060900.1	1	NC_003279.8	13136586	13138521	0.09	0.09	0.3	0.44	0.41	0.52	1.51827	2.93372e-05
173495	col-40	NM_061512.2	1	NC_003280.10	1105046	1106923	0.22	0.13	0.16	0.26	0.85	0.32	1.45421	0.000646028					GO:0005576///extracellular region+++GO:0005581///collagen trimer	GO:0042302///structural constituent of cuticle	GO:0040002///collagen and cuticulin-based cuticle development
178677	acs-3	NM_071139.3	1	NC_003283.11	1969541	1974390	2.69	1.1	3.53	5.22	4.39	5.11	1.01164	6.1998e-41	01100///Metabolic pathways+++04216///Ferroptosis+++00061///Fatty acid biosynthesis+++04146///Peroxisome+++01212///Fatty acid metabolism+++03320///PPAR signaling pathway+++04714///Thermogenesis+++00071///Fatty acid degradation+++02024///Quorum sensing+++04920///Adipocytokine signaling pathway	H00480///Non-syndromic X-linked mental retardation	M00086///beta-Oxidation, acyl-CoA synthesis	R01280///Palmitate:CoA ligase (AMP-forming) ATP + Hexadecanoic acid + CoA <=> AMP + Palmitoyl-CoA + Diphosphate		GO:0003824///catalytic activity	GO:0008152///metabolic process
178802	cyp-35A5	NM_071691.5	1	NC_003283.11	3936396	3938425	1.77	1.02	2.4	3.74	4.93	4.18	1.30079	2.0821e-39						GO:0016705///oxidoreductase activity, acting on paired donors, with incorporation or reduction of molecular oxygen+++GO:0020037///heme binding+++GO:0008395///steroid hydroxylase activity+++GO:0005506///iron ion binding	GO:0009410///response to xenobiotic stimulus+++GO:0045087///innate immune response
189167	W03G1.5	NM_067535.3	1	NC_003282.8	505069	506484	1.39	1.3	1.42	4.97	4.89	4.73	1.81769	1.01171e-68
189108	mltn-3	NM_064514.1	1	NC_003280.10	13916355	13919677	0.8	0.14	0.92	1.09	1.27	1.4	1.01867	6.91591e-13					GO:0016020///membrane+++GO:0016021///integral component of membrane
182601	C14C6.3	NM_070839.2	1	NC_003283.11	543469	545359	0.16	0	0.22	1.18	1.86	1.43	3.53347	1.29406e-31					GO:0016020///membrane+++GO:0016021///integral component of membrane	GO:0008107///galactoside 2-alpha-L-fucosyltransferase activity	GO:0043413///macromolecule glycosylation+++GO:0036065///fucosylation+++GO:0005975///carbohydrate metabolic process
183069	oac-5	NM_074713.2	1	NC_003283.11	16292753	16295600	0.04	0.05	0.05	0.33	0.22	0.12	2.29643	1.16355e-07					GO:0016021///integral component of membrane+++GO:0016020///membrane	GO:0016740///transferase activity+++GO:0016746///transferase activity, transferring acyl groups+++GO:0016747///transferase activity, transferring acyl groups other than amino-acyl groups
178521	clec-197	NM_070689.4	1	NC_003282.8	17345598	17346680	0.04	0.26	0.04	6.33	9.4	13.22	6.3611	2.7181e-152						GO:0030246///carbohydrate binding
177381	C49A9.6	NM_068531.3	1	NC_003282.8	6211000	6212896	5.97	6.82	6.89	13.56	17.54	12.21	1.11878	1.27661e-72
182482	C10A4.1	NM_076854.2	1	NC_003284.9	7415839	7418627	0.06	0.11	0.1	0.16	0.3	0.33	1.5349	5.7961e-05					GO:0005634///nucleus	GO:0046983///protein dimerization activity	GO:0006357///regulation of transcription by RNA polymerase II
172592	K04G2.10	NM_059819.4	1	NC_003279.8	8057762	8060478	0.36	0.65	0.46	1.63	1.51	0.68	1.35575	1.85951e-08					GO:0016020///membrane+++GO:0016021///integral component of membrane
184266	ugt-36	NM_072419.2	1	NC_003283.11	7167009	7169205	0.47	0.4	1.02	0.21	0.2	0.3	-1.40892	5.32591e-08	00830///Retinol metabolism+++00040///Pentose and glucuronate interconversions+++00860///Porphyrin and chlorophyll metabolism+++01100///Metabolic pathways+++00053///Ascorbate and aldarate metabolism+++00980///Metabolism of xenobiotics by cytochrome P450+++01110///Biosynthesis of secondary metabolites+++00983///Drug metabolism - other enzymes+++00982///Drug metabolism - cytochrome P450+++00140///St…	H02054///Crigler-Najjar syndrome+++H00208///Hyperbilirubinemia+++H01593///Osteoporosis+++H02152///Transient familial neonatal hyperbilirubinemia+++H02055///Gilbert syndrome	M00014///Glucuronate pathway (uronate pathway)+++M00129///Ascorbate biosynthesis, animals, glucose-1P => ascorbate	R08261///UDP-glucuronate + Codeine <=> UDP + Codeine-6-glucuronide+++R08263///Morphine + UDP-glucuronate <=> Morphine-6-glucuronide + UDP+++R02389///UDPglucuronate beta-D-glucuronosyltransferase(acceptor-unspecific) 2 UDP-glucuronate + Bilirubin <=> 2 UDP + Bilirubin beta-diglucuronide+++R08259///SN-38 + UDP-glucuronate <=> SN38 glucuronide + UDP+++R04354///UDPglucuronate beta-D-glucuronosyltrans…	GO:0043231///intracellular membrane-bounded organelle+++GO:0016021///integral component of membrane+++GO:0016020///membrane	GO:0016758///transferase activity, transferring hexosyl groups+++GO:0016740///transferase activity+++GO:0008194///UDP-glycosyltransferase activity	GO:0008152///metabolic process
184948	F26A1.8	NM_065596.1	1	NC_003281.10	4820798	4822226	1.65	0.34	0.63	2.73	2.99	2.79	1.6871	4.31544e-31					GO:0016021///integral component of membrane+++GO:0016020///membrane
191381	clec-58	NM_063855.1	1	NC_003280.10	10474221	10476139	0.14	0.02	0.05	0.46	0.5	0.32	2.58594	1.24943e-08						GO:0030246///carbohydrate binding
180590	clec-265	NM_076117.4	1	NC_003284.9	3031796	3033067	28.39	13.73	35.73	55.47	75.57	61.53	1.29538	0						GO:0030246///carbohydrate binding
3896764	K06B9.6	NM_001038333.3	1	NC_003282.8	4196236	4196496	1.11	1.95	1.67	0	0	0	-5.14198	3.65104e-05
187267	K10D11.2	NM_070086.1	1	NC_003282.8	12979017	12981940	0.17	0.27	0	0.43	0.39	0.55	1.61291	8.71321e-05
3565254	W02A2.9	NM_001028239.1	1	NC_003282.8	13347687	13348575	6.7	10.52	7.87	2.1	4.05	5.12	-1.25216	0.000135759					GO:0016020///membrane+++GO:0016021///integral component of membrane
174682	R03D7.2	NM_063953.3	1	NC_003280.10	10933019	10935140	18.38	19.3	14.92	6.77	7.33	6.16	-1.38892	1.81223e-195	03015///mRNA surveillance pathway+++03013///RNA transport		M00430///Exon junction complex (EJC)
173196	sepa-1	NM_060938.3	1	NC_003279.8	13298301	13300701	0.05	0.05	0.05	0.14	0.25	0.15	1.8353	5.69266e-05	04310///Wnt signaling pathway+++04919///Thyroid hormone signaling pathway+++04024///cAMP signaling pathway+++04350///TGF-beta signaling pathway+++04068///FoxO signaling pathway+++04922///Glucagon signaling pathway+++04330///Notch signaling pathway+++04066///HIF-1 signaling pathway+++04630///Jak-STAT signaling pathway+++04110///Cell cycle+++04520///Adherens junction+++04720///Long-term potentiatio…	H00504///Rubinstein-Taybi syndrome+++H01613///Follicular lymphoma			GO:0005737///cytoplasm+++GO:0005634///nucleus	GO:0043621///protein self-association+++GO:0003712///transcription coregulator activity+++GO:0005515///protein binding+++GO:0030674///protein binding, bridging	GO:0006355///regulation of transcription, DNA-templated+++GO:0006914///autophagy
191554	ZK1290.1	NM_063186.2	1	NC_003280.10	7561766	7562667	0	0.05	0	0.82	0.91	1.01	5.86083	1.65958e-14
189435	flh-3	NM_069218.2	1	NC_003282.8	9270097	9271618	0.76	2.11	0.99	2.71	3.26	2.64	1.13837	1.95945e-18						GO:0003700///DNA-binding transcription factor activity+++GO:0043565///sequence-specific DNA binding	GO:0045892///negative regulation of transcription, DNA-templated
189489	mct-1	NM_001316830.1+++NM_001316831.1+++NM_071254.2	3	NC_003283.11	2375043	2379505	53.3	56.44	44.84	139.8	129.12	131.07	1.36231	0					GO:0016020///membrane+++GO:0016021///integral component of membrane	GO:0008028///monocarboxylic acid transmembrane transporter activity	GO:0015718///monocarboxylic acid transport
191270	ZK262.8	NM_075208.2	1	NC_003283.11	18438381	18440195	1.55	1.56	1.29	0.69	0.64	0.77	-1.07986	3.33672e-06
3565437	F58F9.8	NM_001028072.1	1	NC_003282.8	6238197	6239437	0.03	0	0.07	0.42	0.58	0.77	4.11541	6.4542e-12
174925	F35C5.3	NM_064338.3	1	NC_003280.10	12888778	12890460	0	0	0.02	0.24	0.13	0.09	4.27587	3.4887e-05						GO:0003677///DNA binding	GO:0006352///DNA-templated transcription, initiation
180295	Y43F8C.16	NM_075415.3	1	NC_003283.11	19714222	19715519	0	0	0	0.21	0.43	0.53	6.5198	1.64373e-11
189979	Y47D3B.3	NM_067067.3	1	NC_003281.10	11397941	11401886	1.29	0.24	1.65	3.08	1.96	2.47	1.24239	1.44641e-10
180208	Y51A2D.8	NM_075226.5	1	NC_003283.11	18550052	18553846	0.43	0.12	0.25	2.41	3.14	4.69	3.68052	1.92104e-83					GO:0005615///extracellular space+++GO:0005764///lysosome	GO:0008234///cysteine-type peptidase activity+++GO:0004197///cysteine-type endopeptidase activity	GO:0051603///proteolysis involved in cellular protein catabolic process+++GO:0006508///proteolysis
184866	pals-14	NM_060901.2	1	NC_003279.8	13139132	13141789	0.08	0.03	0.16	0.44	0.28	0.66	2.37844	1.1074e-07
183059	irld-23	BGIR6239_30104+++BGIR6239_30105+++NM_078359.3	3	NC_003284.9	17073810	17079723	445.16	624.42	579.64	1099.3	1384.58	1269.14	1.09124	0
175938	ctsa-2	NM_066059.3	1	NC_003281.10	6612553	6615066	15.62	10.5	19.98	2.89	3.69	3.42	-2.21084	3.34689e-305	04614///Renin-angiotensin system+++04142///Lysosome	H00276///Galactosialidosis+++H00422///Glycoproteinoses			GO:0016020///membrane+++GO:0045121///membrane raft+++GO:0016021///integral component of membrane	GO:0016787///hydrolase activity+++GO:0008233///peptidase activity+++GO:0004180///carboxypeptidase activity+++GO:0004185///serine-type carboxypeptidase activity	GO:0006508///proteolysis+++GO:0051603///proteolysis involved in cellular protein catabolic process
13187945	F26H11.8	NM_001267498.1	1	NC_003280.10	14388513	14388824	0	0.33	0	1.52	1.62	1.55	3.6718	5.35219e-06
178212	K08E7.6	NM_070009.3	1	NC_003282.8	12579055	12581128	0.57	0.48	0.31	0.91	1.01	0.93	1.04389	0.000115822
184274	fbxa-18	NM_074665.1	1	NC_003283.11	16143615	16144653	0.17	0.28	0.17	0.53	0.8	1.34	2.09207	3.68858e-06
186636	F59F5.5	NM_077366.2	1	NC_003284.9	10546062	10548962	0.26	0.45	0.29	0.76	0.79	0.83	1.23554	4.16656e-06
189235	W06A11.4	NM_062314.1	1	NC_003280.10	4055939	4057653	5.5	5.01	4.97	2.58	2.82	2.29	-1.02631	1.26858e-22
186738	oac-37	NM_070309.2	1	NC_003282.8	14145986	14148869	0.05	0.03	0.04	0.29	0.49	0.36	3.21557	1.26865e-15					GO:0016020///membrane+++GO:0016021///integral component of membrane	GO:0016746///transferase activity, transferring acyl groups+++GO:0016740///transferase activity+++GO:0016747///transferase activity, transferring acyl groups other than amino-acyl groups	GO:0033692///cellular polysaccharide biosynthetic process
174865	tag-276	NM_064200.3	1	NC_003280.10	12248322	12249078	0.14	0.14	0.07	0.52	0.62	0.63	2.29098	0.00050648
181864	B0228.8	NM_063229.2	1	NC_003280.10	7759710	7761540	0	0	0	0.06	0.06	0.12	4.61291	0.000971663
191171	ugt-16	NM_073809.4	1	NC_003283.11	12825045	12827273	3.76	2.61	6.31	7.04	11.3	8.99	1.10238	2.10355e-69	00053///Ascorbate and aldarate metabolism+++00983///Drug metabolism - other enzymes+++00830///Retinol metabolism+++01110///Biosynthesis of secondary metabolites+++00982///Drug metabolism - cytochrome P450+++01100///Metabolic pathways+++00980///Metabolism of xenobiotics by cytochrome P450+++00140///Steroid hormone biosynthesis+++00860///Porphyrin and chlorophyll metabolism+++00040///Pentose and gl…	H01593///Osteoporosis+++H02054///Crigler-Najjar syndrome+++H00208///Hyperbilirubinemia+++H02152///Transient familial neonatal hyperbilirubinemia+++H02055///Gilbert syndrome	M00014///Glucuronate pathway (uronate pathway)+++M00129///Ascorbate biosynthesis, animals, glucose-1P => ascorbate	R02358///UDPglucuronate beta-D-glucuronosyltransferase(acceptor-unspecific) Estrone + UDP-glucuronate <=> Estrone glucuronide + UDP+++R08261///UDP-glucuronate + Codeine <=> UDP + Codeine-6-glucuronide+++R02389///UDPglucuronate beta-D-glucuronosyltransferase(acceptor-unspecific) 2 UDP-glucuronate + Bilirubin <=> 2 UDP + Bilirubin beta-diglucuronide+++R03091///UDPglucuronate beta-D-glucuronosyltran…	GO:0016020///membrane+++GO:0043231///intracellular membrane-bounded organelle+++GO:0016021///integral component of membrane	GO:0016758///transferase activity, transferring hexosyl groups+++GO:0008194///UDP-glycosyltransferase activity+++GO:0015020///glucuronosyltransferase activity+++GO:0016740///transferase activity+++GO:0016757///transferase activity, transferring glycosyl groups	GO:0008152///metabolic process
187346	K12H6.8	NM_061976.2	1	NC_003280.10	2827897	2828567	0	0	0	4.42	5.6	7.01	8.51176	1.27154e-36
185696	F43C11.2	NM_061851.2	1	NC_003280.10	2354776	2355951	0	0	0	1.9	3.39	4.15	8.25676	1.1022e-31
3565826	F46B6.13	NM_001028763.1	1	NC_003283.11	9798926	9799163	0	0	0	2.4	1.47	3.31	5.48738	3.1134e-06
189987	Y47D7A.11	NM_071823.4	1	NC_003283.11	4427827	4428286	0	0	0	0.69	0.76	1.01	5.68901	4.99744e-07
178743	T03D3.5	NM_071364.4	1	NC_003283.11	2824106	2826820	13.93	18.34	14.25	7.77	7.55	6.39	-1.11743	8.87128e-75
3565918	C36A4.11	NM_001026033.3	1	NC_003281.10	3840886	3841150	0	0	0	1.47	2.52	0.26	4.8353	0.000299387
185031	F28A10.5	NM_061432.1	1	NC_003280.10	849678	850654	0.03	0	0.13	0.37	0.67	0.29	2.99142	1.54586e-07
184615	clec-221	NM_073394.3	1	NC_003283.11	10953501	10954418	1.63	0.69	0.62	3.43	3.59	3.92	1.8704	5.55238e-21						GO:0030246///carbohydrate binding
179432	B0024.4	NM_073247.3	1	NC_003283.11	10297432	10298838	2.37	2.54	4.72	15.75	18.02	13.03	2.26944	1.89114e-235					GO:0045121///membrane raft		GO:0045087///innate immune response
181824	bath-20	NM_001038232.2+++NM_001038233.1	2	NC_003280.10	2040368	2041615	3.36	2.31	2.14	1.06	1.28	1.39	-1.06118	9.61667e-10
259418	C52E2.5	NM_061690.3	1	NC_003280.10	1840975	1842936	0.35	0.15	0.63	1.27	1.54	0.74	1.64504	3.0554e-19
4363044	F12E12.11	NM_001047297.4	1	NC_003280.10	3742523	3743776	2.64	2.77	3.16	1.15	1.12	0.65	-1.57472	3.32164e-19						GO:0016491///oxidoreductase activity	GO:0055114///oxidation-reduction process
183621	C49G7.13	NM_001356632.1	1	NC_003283.11	4036111	4038054	0.03	0	0	24.9	37.78	21.99	11.552	0
4363028	poml-4	NM_001047325.3	1	NC_003280.10	1540969	1542718	0.05	0.13	0.08	0.47	1.15	0.53	2.98613	1.99951e-14						GO:0004064///arylesterase activity
179206	C16D9.4	NM_072723.4	1	NC_003283.11	8241012	8242875	3.84	1.56	3.47	5.29	8.01	6.21	1.12563	4.5818e-36
173691	C16C8.19	NM_062149.3	1	NC_003280.10	3458584	3459023	0	0.36	0	1.18	2.92	3.58	4.33172	2.35932e-18
185332	his-29	NM_069002.1	1	NC_003282.8	8331044	8331412	3.23	4.35	3.12	8.18	7.2	7.96	1.07459	3.1947e-10					GO:0000785///chromatin+++GO:0000786///nucleosome+++GO:0005634///nucleus	GO:0003677///DNA binding+++GO:0046982///protein heterodimerization activity	GO:0006334///nucleosome assembly
182604	C14C6.8	NM_070842.3	1	NC_003283.11	551279	553167	0.24	0.07	0.02	0.82	1.07	0.78	3.00777	8.95779e-25
3566000	nspc-6	NM_001029179.1	1	NC_003284.9	8541146	8541496	10.42	24.82	11.1	4.14	5.68	4.03	-1.83594	3.46908e-33
266913	F10D2.8	NM_001322565.1+++NM_072412.6	2	NC_003283.11	7148688	7150686	0.9	0.09	1.12	2.29	3.1	2.43	1.92103	8.40716e-09	00053///Ascorbate and aldarate metabolism+++01100///Metabolic pathways+++00980///Metabolism of xenobiotics by cytochrome P450+++00140///Steroid hormone biosynthesis+++00983///Drug metabolism - other enzymes+++00040///Pentose and glucuronate interconversions+++01110///Biosynthesis of secondary metabolites+++00860///Porphyrin and chlorophyll metabolism+++00982///Drug metabolism - cytochrome P450+++…	H02152///Transient familial neonatal hyperbilirubinemia+++H02054///Crigler-Najjar syndrome+++H02055///Gilbert syndrome+++H01593///Osteoporosis+++H00208///Hyperbilirubinemia	M00014///Glucuronate pathway (uronate pathway)+++M00129///Ascorbate biosynthesis, animals, glucose-1P => ascorbate	R08261///UDP-glucuronate + Codeine <=> UDP + Codeine-6-glucuronide+++R02902///Retinoate + UDP-glucuronate <=> all-trans-Retinoyl-beta-glucuronide + UDP+++R02502///17beta-hydroxysteroid UDP-glucuronosyltransferase Testosterone + UDP-glucuronate <=> Testosterone glucuronide + UDP+++R02358///UDPglucuronate beta-D-glucuronosyltransferase(acceptor-unspecific) Estrone + UDP-glucuronate <=> Estrone gluc…	GO:0016021///integral component of membrane+++GO:0016020///membrane+++GO:0043231///intracellular membrane-bounded organelle	GO:0016758///transferase activity, transferring hexosyl groups+++GO:0008194///UDP-glycosyltransferase activity+++GO:0016740///transferase activity	GO:0008152///metabolic process
182978	C28C12.4	NM_069047.3	1	NC_003282.8	8487519	8488334	10.95	8.38	9.7	3.45	3.65	4.02	-1.39992	4.32215e-43
353420	gsto-2	NM_181976.3	1	NC_003281.10	8554796	8555681	0.47	0.23	0.28	0.12	0.04	0	-2.61591	0.000135535	00983///Drug metabolism - other enzymes+++00480///Glutathione metabolism+++00982///Drug metabolism - cytochrome P450+++00980///Metabolism of xenobiotics by cytochrome P450	H00516///Cleft lip and/or cleft palate+++H00024///Prostate cancer		R07116///2-bromoacetaldehyde:glutathione S-(formylmethyl)transferase 2-Bromoacetaldehyde + Glutathione <=> S-(Formylmethyl)glutathione + Hydrobromic acid+++R07025///1-nitro-5-hydroxy-6-glutathionyl-5,6-dihydronaphthalene glutathione-lyase (epoxide-forming) 1-Nitronaphthalene-5,6-oxide + Glutathione <=> 1-Nitro-5-hydroxy-6-glutathionyl-5,6-dihydronaphthalene+++R07069///3,4-dihydro-3-hydroxy-4-S-gl…	GO:0005737///cytoplasm	GO:0045174///glutathione dehydrogenase (ascorbate) activity+++GO:0016740///transferase activity+++GO:0050610///methylarsonate reductase activity+++GO:0004364///glutathione transferase activity+++GO:0016491///oxidoreductase activity	GO:0098869///cellular oxidant detoxification+++GO:0055114///oxidation-reduction process
180250	asp-17	NM_171583.3	1	NC_003283.11	19035753	19037318	3.52	2.44	3.25	9.34	9.9	11.08	1.7102	1.72598e-106						GO:0008233///peptidase activity+++GO:0016787///hydrolase activity+++GO:0004190///aspartic-type endopeptidase activity	GO:0030163///protein catabolic process+++GO:0006508///proteolysis
6418801	Y43F8B.19	NM_001129572.2	1	NC_003283.11	19510780	19512164	0	0	0	0.26	0.13	0.37	5.19787	2.9628e-05					GO:0005783///endoplasmic reticulum	GO:0046872///metal ion binding+++GO:0016491///oxidoreductase activity+++GO:0004656///procollagen-proline 4-dioxygenase activity+++GO:0005506///iron ion binding+++GO:0016705///oxidoreductase activity, acting on paired donors, with incorporation or reduction of molecular oxygen+++GO:0031418///L-ascorbic acid binding	GO:0018401///peptidyl-proline hydroxylation to 4-hydroxy-L-proline+++GO:0055114///oxidation-reduction process
179082	Y57E12B.4	NM_072355.3	1	NC_003283.11	6945711	6947517	0	0.03	0.03	0.25	0.39	0.36	4.02794	8.67388e-08
3565591	F55B11.5	NM_001028054.1	1	NC_003282.8	14427695	14428431	1.14	1.21	1.48	4.2	4.57	2.7	1.54739	8.51703e-17
182919	C25G6.3	NM_075830.3	1	NC_003284.9	1233093	1238891	0.09	0.12	0.32	1.31	1.29	1.54	2.96285	6.94302e-44						GO:0003824///catalytic activity	GO:0008152///metabolic process
185723	F44A6.3	NM_077314.1	1	NC_003284.9	10212771	10214165	0	0	0	0.58	0.41	0.27	4.72838	0.000537944
186048	scl-9	NM_070096.1	1	NC_003282.8	13047197	13048223	0	0	0	0.95	1.99	2.38	7.76941	5.96896e-24					GO:0005615///extracellular space
187659	R07B7.12	NM_001129513.1+++NM_073631.1	2	NC_003283.11	12089073	12091793	0	0	0.05	0.2	0.23	0.15	3.53044	1.3852e-07					GO:0016020///membrane+++GO:0016021///integral component of membrane	GO:0016757///transferase activity, transferring glycosyl groups+++GO:0016740///transferase activity
185038	F28A12.3	NM_072830.1	1	NC_003283.11	8640709	8641344	1.82	0.74	1.92	2.97	2.98	4.59	1.22762	1.23078e-08					GO:0016021///integral component of membrane+++GO:0016020///membrane
190937	Y110A2AL.6	NM_061980.2	1	NC_003280.10	2841052	2841629	0	0	0	0.87	1.37	1.3	6.64265	2.22566e-12
178718	Y19D10A.4	NM_001316832.1+++NM_001316833.1+++NM_071256.2	3	NC_003283.11	2385956	2390722	5.81	3.41	5.39	16.64	14.52	15.94	1.75308	1.90937e-193					GO:0016021///integral component of membrane	GO:0022857///transmembrane transporter activity	GO:0055085///transmembrane transport+++GO:0006820///anion transport
180093	cyp-37B1	NM_074708.5	1	NC_003283.11	16278266	16280560	2.16	0.83	3.07	5.66	5.79	5.76	1.50665	1.34335e-67					GO:0016021///integral component of membrane	GO:0020037///heme binding+++GO:0005506///iron ion binding+++GO:0016705///oxidoreductase activity, acting on paired donors, with incorporation or reduction of molecular oxygen+++GO:0004497///monooxygenase activity	GO:0050830///defense response to Gram-positive bacterium
192096	tsp-1	BGIR6239_29431+++NM_066403.4	2	NC_003281.10	8236984	8239397	0.04	0.2	0.58	1.27	1.63	1.42	2.37844	2.62126e-14					GO:0016021///integral component of membrane+++GO:0005887///integral component of plasma membrane+++GO:0016020///membrane		GO:0007166///cell surface receptor signaling pathway+++GO:0045087///innate immune response
179871	F53C11.1	NM_001307783.1+++NM_074010.5	2	NC_003283.11	13775804	13777734	5.73	5.93	8.85	15.99	19.21	14.09	1.26558	3.41582e-142					GO:0045121///membrane raft		GO:0045087///innate immune response
172290	ZK484.6	NM_059355.4	1	NC_003279.8	6090306	6090857	16.41	12.31	17.37	6.55	6.58	7.78	-1.1647	4.24059e-30						GO:0003824///catalytic activity	GO:0008152///metabolic process
191291	ZK354.3	NM_068376.1	1	NC_003282.8	5310234	5311403	2.17	2.39	1.1	0.79	0.92	0.79	-1.19966	4.443e-10
3565255	K03B8.11	NM_001028856.1	1	NC_003283.11	11390273	11390494	0	0	0	1.54	3.57	4.8	6.34987	2.08658e-10
176367	best-5	NM_066741.3	1	NC_003281.10	9687030	9690219	0.34	0.3	0.45	0.6	0.84	0.88	1.08041	9.24709e-06					GO:0034707///chloride channel complex+++GO:0005886///plasma membrane+++GO:0016020///membrane+++GO:0016021///integral component of membrane	GO:0005254///chloride channel activity	GO:1902476///chloride transmembrane transport+++GO:0006811///ion transport+++GO:0006821///chloride transport
184954	F26A3.5	NM_059733.2	1	NC_003279.8	7667729	7669797	30.68	25.05	25.32	10.99	8.81	9.27	-1.49211	2.37969e-194
190831	Y102A5C.4	NM_074877.2	1	NC_003283.11	16922252	16924258	0.34	0.29	0.45	2.36	2.68	2.77	2.8548	4.09573e-72
3565104	F17C11.13	NM_001028640.2+++NM_001307763.1	2	NC_003283.11	10956021	10956980	0.45	0.95	2.18	2.6	3.23	2.86	1.26241	2.3139e-05					GO:0016021///integral component of membrane+++GO:0016020///membrane
176726	F14F7.5	NM_001306694.1+++NM_001306695.1	2	NC_003281.10	13032001	13036344	0.5	0.28	0.41	0.03	0.12	0.09	-2.34129	1.44945e-16					GO:0016020///membrane+++GO:0016021///integral component of membrane
182965	C27D9.2	NM_062451.4	1	NC_003280.10	4755681	4756765	3.04	1.4	3.76	5.61	6.41	4.73	1.00449	3.69951e-10					GO:0005615///extracellular space
189139	sknr-1	NM_001316826.1+++NM_001316827.1	2	NC_003283.11	2622056	2625460	0	0	0	0.32	0.21	0.17	5.78283	1.98178e-07	04141///Protein processing in endoplasmic reticulum+++04212///Longevity regulating pathway - worm	H00048///Hepatocellular carcinoma			GO:0005634///nucleus	GO:0003677///DNA binding+++GO:0003700///DNA-binding transcription factor activity	GO:0006355///regulation of transcription, DNA-templated
185310	F35F10.5	NM_071507.2	1	NC_003283.11	3285022	3285680	2.13	4.17	1.18	1	1.19	0.82	-1.36285	4.48732e-08
175428	frm-8	NM_065271.4+++NM_171096.3+++NM_171097.4	3	NC_003281.10	3200951	3219143	1.13	1.28	1.37	2.65	3.05	3.15	1.20314	3.82644e-42					GO:0005737///cytoplasm+++GO:0005856///cytoskeleton	GO:0005515///protein binding	GO:0043065///positive regulation of apoptotic process+++GO:0035329///hippo signaling
172671	hot-5	NM_059948.4	1	NC_003279.8	8683220	8687090	0.6	0.29	0.97	1.24	2.28	1.06	1.26357	5.46565e-05					GO:0030424///axon+++GO:0043025///neuronal cell body+++GO:0019897///extrinsic component of plasma membrane		GO:1990834///response to odorant+++GO:0042048///olfactory behavior
186346	F56A4.3	NM_071272.4	1	NC_003283.11	2453427	2456084	0.21	0.22	0	98.86	101.3	106.22	9.39702	0	00983///Drug metabolism - other enzymes+++00480///Glutathione metabolism+++00980///Metabolism of xenobiotics by cytochrome P450+++00982///Drug metabolism - cytochrome P450	H00024///Prostate cancer+++H00516///Cleft lip and/or cleft palate		R08280///4-glutathionyl cyclophosphamide hydrolase Aldophosphamide + Glutathione <=> 4-Glutathionyl cyclophosphamide + H2O+++R07023///1-nitro-7-hydroxy-8-glutathionyl-7,8-dihydronaphthalene glutathione-lyase (epoxide-forming) 1-Nitronaphthalene-7,8-oxide + Glutathione <=> 1-Nitro-7-hydroxy-8-glutathionyl-7,8-dihydronaphthalene+++R11905///Hepatotoxins + Glutathione <=> R-S-Glutathione+++R07003///(…		GO:0004364///glutathione transferase activity	GO:0042542///response to hydrogen peroxide+++GO:0006749///glutathione metabolic process+++GO:0010225///response to UV-C+++GO:0055114///oxidation-reduction process+++GO:0010286///heat acclimation+++GO:0008340///determination of adult lifespan
181113	F18E9.7	NM_001270135.1+++NM_001270136.1	2	NC_003284.9	8595152	8597747	0	0	0	0.69	1.55	2.08	8.47916	5.94422e-36
177151	clec-67	NM_068036.4	1	NC_003282.8	3922195	3924423	9.27	14.84	11.26	23.23	22.19	29.78	1.08272	4.1935e-160						GO:0030246///carbohydrate binding	GO:0045087///innate immune response
183270	C36C5.14	NM_071470.1	1	NC_003283.11	3164718	3165515	0.88	0.66	1.32	3.82	4.96	3.64	2.09207	1.38074e-26					GO:0005576///extracellular region
180157	Y6G8.2	BGIR6239_29867+++NM_001269818.1	2	NC_003283.11	17594424	17598935	1.74	1.23	2.38	0.23	0.34	0.45	-2.39345	2.82909e-46
190240	Y53G8AR.1	NM_065291.1	1	NC_003281.10	3333036	3333957	0.72	0.92	0.81	0.22	0.19	0.36	-1.6672	1.66931e-06
182868	C24H12.6	NM_061328.3	1	NC_003280.10	417349	418460	2.59	1.21	1.73	0.98	0.97	0.83	-1.01158	3.69129e-05
181641	eat-20	BGIR6239_29997+++NM_001029569.2+++NM_001029570.2	3	NC_003284.9	15509387	15523811	6.94	2.75	6.71	13.57	12.41	13.7	1.27098	5.51952e-196					GO:0016020///membrane+++GO:0030424///axon+++GO:0009986///cell surface+++GO:0016021///integral component of membrane	GO:0005509///calcium ion binding
183190	C33H5.16	BGIR6239_29618+++NM_068892.3	2	NC_003282.8	7794989	7803322	14.72	12.52	16.21	6.85	6.41	6.1	-1.17794	2.6818e-75					GO:0005634///nucleus+++GO:0000775///chromosome, centromeric region	GO:0016787///hydrolase activity+++GO:0016791///phosphatase activity+++GO:0004721///phosphoprotein phosphatase activity+++GO:0004725///protein tyrosine phosphatase activity	GO:0006470///protein dephosphorylation+++GO:0016311///dephosphorylation+++GO:0035335///peptidyl-tyrosine dephosphorylation
183155	gba-2	NM_061807.5	1	NC_003280.10	2182518	2186421	0.99	1.48	1.36	0.43	0.5	0.24	-1.71787	2.85878e-19	04142///Lysosome+++00511///Other glycan degradation+++00600///Sphingolipid metabolism+++01100///Metabolic pathways	H00066///Lewy body dementia (LBD)+++H00426///Defects in the degradation of ganglioside+++H00810///Progressive myoclonic epilepsy (PME/ EPM)+++H00126///Gaucher disease		R01498///D-Glucosyl-N-acylsphingosine glucohydrolase beta-D-Glucosyl-(1<->1)-ceramide + H2O <=> D-Glucose + N-Acylsphingosine	GO:0005764///lysosome	GO:0004348///glucosylceramidase activity+++GO:0016787///hydrolase activity	GO:0006665///sphingolipid metabolic process+++GO:0006629///lipid metabolic process+++GO:0006680///glucosylceramide catabolic process
182677	C16C8.10	NM_062153.1	1	NC_003280.10	3464155	3464680	0	0	0	1.09	0.69	1.16	6.3855	1.25102e-10
188082	clec-140	NM_062425.1	1	NC_003280.10	4674473	4675729	0	0.04	0.08	0.34	0.36	0.49	3.25034	4.4788e-06						GO:0030246///carbohydrate binding
4926959	F22B3.10	NM_001083215.4	1	NC_003282.8	11413208	11414895	0.03	0	0.03	0.36	0.41	0.25	3.98214	1.56374e-07
180171	fbxa-156	NM_171558.5	1	NC_003283.11	17895372	17896761	7.49	4.43	8.33	2.1	3.43	2.33	-1.37986	8.78379e-51
3565926	F30A10.11	NM_001026258.1	1	NC_003279.8	9477478	9478098	0	0	0.66	2.4	2.39	3.44	3.64265	1.08968e-10
3565893	Y71G12B.32	NM_001026654.2	1	NC_003279.8	1813939	1816017	0.11	0.22	0.5	0.85	0.93	0.82	1.6346	2.24158e-06
191404	ZK686.1	BGIR6239_29258+++NM_066292.3	2	NC_003281.10	7772802	7773852	55.05	63.24	54.67	27.16	25.35	21.69	-1.24362	1.72238e-231
182735	C17E7.13	NM_071670.1	1	NC_003283.11	3887750	3889253	0.34	0.2	0.35	1.13	1.4	1.49	2.16039	3.09884e-14					GO:0016021///integral component of membrane+++GO:0016020///membrane
3565619	grd-13	NM_001028251.4	1	NC_003282.8	3438362	3439417	5.35	14.3	6.62	3.6	4.35	3.75	-1.21804	1.54504e-19
259717	nspc-1	NM_001029181.3	1	NC_003284.9	8534727	8535078	20.41	34.4	20.42	4.25	1.47	4.4	-2.93834	7.62637e-92
183244	C35E7.7	NM_060427.2	1	NC_003279.8	10813815	10814887	0.09	0.17	0	0.92	0.97	1.72	3.76491	4.15653e-09
13217335	F11A5.18	NM_001269772.1	1	NC_003283.11	16202918	16204862	0.47	0.27	0.66	0	0	0	-4.87895	0.00020042
185557	F40G9.9	NM_064765.3	1	NC_003281.10	170370	171710	0	0	0	0.07	0.3	0.05	5.11541	5.25186e-05					GO:0016020///membrane+++GO:0016021///integral component of membrane
189974	Y47D3A.1	NM_067035.3	1	NC_003281.10	11139261	11141635	0.12	0.14	0.14	0.29	0.58	0.2	1.37844	0.000344101					GO:0016020///membrane	GO:0046920///alpha-(1->3)-fucosyltransferase activity+++GO:0008417///fucosyltransferase activity	GO:0036065///fucosylation+++GO:0006486///protein glycosylation
186968	col-75	NM_062893.1	1	NC_003280.10	6426293	6427423	0.34	0.17	0.28	1.12	0.62	0.57	1.54878	6.70153e-06					GO:0005581///collagen trimer	GO:0042302///structural constituent of cuticle
188436	scl-18	NM_069827.2	1	NC_003282.8	11752987	11754373	0.14	0	0.14	0.37	0.54	0.36	2.19787	0.000312816					GO:0005615///extracellular space
190984	clec-193	NM_070590.1	1	NC_003282.8	16805027	16806440	0.1	0	0	0.37	0.55	0.8	4.07234	4.83004e-08						GO:0030246///carbohydrate binding
176117	col-90	NM_066328.5	1	NC_003281.10	7948890	7949907	81.46	16.21	62.75	117.58	89.13	124.09	1.04154	0					GO:0005581///collagen trimer	GO:0042302///structural constituent of cuticle
185396	F36H12.10	NM_068355.1	1	NC_003282.8	5253441	5254740	33.3	32.11	30.3	8.25	7.77	11.43	-1.80699	0						GO:0004725///protein tyrosine phosphatase activity+++GO:0004721///phosphoprotein phosphatase activity+++GO:0016791///phosphatase activity+++GO:0016787///hydrolase activity	GO:0016311///dephosphorylation+++GO:0006470///protein dephosphorylation+++GO:0035335///peptidyl-tyrosine dephosphorylation
187556	R03H10.4	NM_062329.1	1	NC_003280.10	4167555	4168500	0.16	0	0.4	1.06	1.38	1.76	2.92103	1.69314e-09
183811	nhx-3	NM_001028564.2+++NM_001028565.1	2	NC_003283.11	7540959	7544838	4.23	4.05	5.45	10.21	12.77	10.79	1.29367	1.43223e-139					GO:0005886///plasma membrane+++GO:0016021///integral component of membrane+++GO:0012505///endomembrane system+++GO:0016020///membrane	GO:0015299///solute:proton antiporter activity+++GO:0015385///sodium:proton antiporter activity+++GO:0015386///potassium:proton antiporter activity+++GO:0015297///antiporter activity	GO:0098719///sodium ion import across plasma membrane+++GO:0071805///potassium ion transmembrane transport+++GO:0006885///regulation of pH+++GO:0006812///cation transport+++GO:0055085///transmembrane transport+++GO:0006814///sodium ion transport+++GO:0051453///regulation of intracellular pH+++GO:0006811///ion transport+++GO:1902600///proton transmembrane transport
190546	Y69A2AR.25	NM_067821.1	1	NC_003282.8	2565841	2568367	0.9	1.55	1.38	0	0.02	0	-7.64279	4.91159e-30
186056	dod-23	NM_063366.1	1	NC_003280.10	8398385	8399154	28.22	161.39	37.59	17.86	20.5	16.26	-2.11722	0
189130	W02H3.1	NM_001270205.1+++NM_001270206.1	2	NC_003284.9	11102684	11105460	2.03	4.54	1.5	5.35	4.94	6.16	1.0623	5.82129e-15
4363084	Y19D10A.16	NM_001047724.1	1	NC_003283.11	2392772	2394147	4.87	8.42	6.21	17.88	15.73	17.7	1.38163	1.0206e-108	00010///Glycolysis / Gluconeogenesis+++00052///Galactose metabolism+++01100///Metabolic pathways+++01130///Biosynthesis of antibiotics+++01120///Microbial metabolism in diverse environments+++01110///Biosynthesis of secondary metabolites		M00632///Galactose degradation, Leloir pathway, galactose => alpha-D-glucose-1P	R01602///D-glucose 1-epimerase alpha-D-Glucose <=> beta-D-Glucose+++R10619///D-galactose 1-epimerase; aldose D-Galactose <=> alpha-D-Galactose		GO:0004034///aldose 1-epimerase activity+++GO:0030246///carbohydrate binding	GO:0006006///glucose metabolic process+++GO:0033499///galactose catabolic process via UDP-galactose
174905	Y46G5A.8	NM_064313.1	1	NC_003280.10	12756353	12757635	0.11	1.01	0.28	0.06	0	0	-4.6725	7.85873e-07					GO:0016020///membrane+++GO:0016021///integral component of membrane
173627	K12H6.9	NM_061974.4	1	NC_003280.10	2824414	2824911	0	0.09	0	12.79	16.39	25.45	9.20037	8.89283e-107
178441	Y105C5A.13	NM_001047536.2+++NM_001047537.1	2	NC_003282.8	15641231	15643805	7.02	2.3	6.67	9.6	10.34	11.1	1.09171	2.89797e-12
179774	T16G1.7	NM_073832.5	1	NC_003283.11	12933035	12935018	6.01	9.47	7.29	1.62	2.29	1.8	-2.00995	5.09287e-113
180143	K10G4.5	NM_001356781.1	1	NC_003283.11	17298341	17301475	0.03	0.08	0.13	0.4	0.57	0.41	2.46852	1.61282e-16
173107	C47F8.1	NM_060719.5	1	NC_003279.8	12335142	12336539	0.21	0.14	0.18	0.54	0.56	0.79	1.84897	4.71867e-06
188016	nhr-271	NM_074793.5	1	NC_003283.11	16578537	16580405	0	0.03	0	0.14	0.21	0.22	4.34987	1.93248e-05					GO:0005634///nucleus	GO:0043565///sequence-specific DNA binding+++GO:0008270///zinc ion binding+++GO:0003677///DNA binding+++GO:0003700///DNA-binding transcription factor activity+++GO:0046872///metal ion binding	GO:0006355///regulation of transcription, DNA-templated
185703	F43C11.12	NM_061854.3	1	NC_003280.10	2365669	2366720	0	0	0	0.5	1.2	2.76	7.02794	1.51396e-15
184612	oac-17	NM_060908.2	1	NC_003279.8	13191983	13194574	0.12	0	0.05	0.15	0.27	0.15	1.68506	0.000191667					GO:0016020///membrane+++GO:0016021///integral component of membrane	GO:0016747///transferase activity, transferring acyl groups other than amino-acyl groups+++GO:0016740///transferase activity+++GO:0016746///transferase activity, transferring acyl groups	GO:0033692///cellular polysaccharide biosynthetic process
178010	M7.10	NM_069672.1	1	NC_003282.8	11101962	11102695	0	0	0	0.14	0.45	0.6	5.6718	5.88767e-07
178519	C49C3.9	NM_070687.3	1	NC_003282.8	17339707	17342233	6.62	7.46	9.57	14.44	18.77	14.77	1.01028	4.45837e-96							GO:0045087///innate immune response
4927023	F13E9.15	NM_001083208.1	1	NC_003282.8	10889538	10889870	9.14	11.43	6.56	4.01	4.27	4.06	-1.20068	2.20577e-12
188697	pgp-7	NM_077411.2	1	NC_003284.9	10864969	10870237	0.19	0.11	0.14	3.02	3.08	5.2	4.68782	0	02010///ABC transporters				GO:0016021///integral component of membrane+++GO:0016020///membrane	GO:0000166///nucleotide binding+++GO:0016887///ATPase activity+++GO:0042626///ATPase activity, coupled to transmembrane movement of substances+++GO:0005524///ATP binding	GO:1990170///stress response to cadmium ion+++GO:0055085///transmembrane transport
7040144	C05C10.8	NM_001136333.1	1	NC_003280.10	9917161	9917939	0	0	0	0.73	1.77	2.43	6.61291	3.65451e-12
3565157	T23E1.3	NM_001028229.1+++NM_001307322.1	2	NC_003282.8	3146894	3148858	3.58	3.32	6	2.18	2.48	1.27	-1.14714	9.00868e-14					GO:0005634///nucleus+++GO:0070449///elongin complex		GO:0006357///regulation of transcription by RNA polymerase II
188924	T26E3.6	NM_060804.2	1	NC_003279.8	12661269	12661668	0	0	0	1.2	1.66	2.23	6.45421	4.52567e-11					GO:0005737///cytoplasm+++GO:0005634///nucleus		GO:0060625///regulation of protein deneddylation
181476	R01E6.5	NM_077862.3	1	NC_003284.9	13537097	13537957	2.36	1.36	2.49	5.22	5.97	8.74	1.67786	2.17007e-40
172013	ppw-1	NM_001136282.2+++NM_058922.4+++NM_170850.3	3	NC_003279.8	4186562	4189759	122.94	120.7	119.17	52.29	47.69	46.99	-1.43706	0						GO:0003676///nucleic acid binding	GO:0031047///gene silencing by RNA
3565992	nas-23	NM_001027110.1	1	NC_003280.10	7491471	7493643	2.44	0.62	2.71	3.91	5.05	3.5	1.10617	1.64081e-32					GO:0005576///extracellular region	GO:0008237///metallopeptidase activity+++GO:0046872///metal ion binding+++GO:0016787///hydrolase activity+++GO:0008270///zinc ion binding+++GO:0004222///metalloendopeptidase activity+++GO:0008233///peptidase activity	GO:0006508///proteolysis+++GO:0018996///molting cycle, collagen and cuticulin-based cuticle
181548	nspc-17	NM_001029340.3	1	NC_003284.9	14524796	14525153	21.09	17.18	20.33	48.18	52.75	60.1	1.41143	5.80776e-76
189547	clec-108	NM_060888.1	1	NC_003279.8	13081448	13082166	0.17	0.05	0.11	1.04	1.64	1.81	3.72838	1.1859e-16						GO:0030246///carbohydrate binding
187741	R09D1.14	NM_063627.1	1	NC_003280.10	9459021	9459562	0	0	0	0.48	0.42	0.22	4.8353	0.000299387							GO:0005975///carbohydrate metabolic process
187144	K08D8.4	NM_001028113.2+++NM_001028114.3+++NM_001028115.3+++NM_001028116.2	4	NC_003282.8	12907547	12909979	5.08	4.67	5.24	19.04	21.72	21.68	2.05583	0							GO:0045087///innate immune response
175099	F26H11.4	NM_064598.4	1	NC_003280.10	14408751	14410809	9.29	7	8.18	2.01	1.87	1.87	-2.10053	6.05156e-148
176670	fbxa-218	NM_001268241.1+++NM_001268242.1	2	NC_003281.10	12436552	12441056	10.04	7.25	8.87	4.37	3.76	3.45	-1.19125	9.83112e-74
185920	F47C12.8	NM_068056.2	1	NC_003282.8	3998053	3998607	0	0.25	0.36	1.91	1.93	2.13	3.26498	6.18751e-13
3564897	R07E5.17	NM_001027533.3	1	NC_003281.10	4402606	4404411	0	0.05	0.15	0.18	0.27	0.3	1.88593	0.000755874					GO:0016020///membrane+++GO:0016021///integral component of membrane
176276	F59B2.12	NM_066597.3	1	NC_003281.10	9017607	9020853	0	0.03	0.03	5.6	7.97	10.53	8.72027	0
3896750	Y102E9.6	NM_001038285.1	1	NC_003281.10	6735968	6736642	0	0	0.08	0.26	0.18	1.38	4.48738	5.95402e-06
190650	Y73B6BL.14	NM_068569.2	1	NC_003282.8	6342491	6342916	2.37	2.02	2.07	0.17	0.88	0.75	-1.90494	4.27352e-05					GO:0032807///DNA ligase IV complex+++GO:0005958///DNA-dependent protein kinase-DNA ligase 4 complex+++GO:0005737///cytoplasm	GO:0003910///DNA ligase (ATP) activity+++GO:0003677///DNA binding	GO:0006310///DNA recombination+++GO:0006281///DNA repair+++GO:0006266///DNA ligation
24104808	R11E3.19	NM_001307420.1	1	NC_003282.8	4775242	4776096	0.49	0.08	0.58	1.19	1.97	2.15	2.19787	1.70008e-08
190216	Y53F4B.17	NM_064701.1	1	NC_003280.10	15058227	15062057	0.04	0.08	0.03	0.64	0.31	0.53	3.33501	1.2832e-10
172022	C43E11.5	NM_058934.4	1	NC_003279.8	4237034	4238559	31.52	27.06	32.22	6.9	6.7	7.82	-2.09248	0						GO:0004725///protein tyrosine phosphatase activity	GO:0006470///protein dephosphorylation+++GO:0035335///peptidyl-tyrosine dephosphorylation
180194	R10E8.1	NM_075167.3	1	NC_003283.11	18242616	18243721	4.16	3.38	4.48	1.2	2.04	1.92	-1.23435	5.30198e-21
180134	F28B1.2	NM_001356778.1	1	NC_003283.11	17044804	17049762	0	0	0	0.03	0.08	0.23	6.31335	3.48818e-10
3565848	Y6G8.5	NM_001029113.3	1	NC_003283.11	17615227	17615709	0	0.2	0	1.16	0.54	0.42	3.30642	2.35851e-06
189376	Y6E2A.5	NM_074510.2	1	NC_003283.11	15716419	15718658	0.47	0.16	0.33	0.55	0.94	0.79	1.22824	1.24564e-06
188051	dhs-31	NM_001268528.1	1	NC_003282.8	10039844	10040791	1.21	1.45	0.64	2.5	2.9	2.2	1.17314	4.44709e-10
185866	F46F5.13	NM_061413.2	1	NC_003280.10	803315	803696	0.12	0	0	0.73	0.52	0.68	4.02794	0.000207571
184824	str-7	NM_001322601.1+++NM_074651.2	2	NC_003283.11	16097997	16099486	1.82	1.86	1.19	4.67	6.42	5.19	1.71778	2.85376e-47					GO:0016021///integral component of membrane+++GO:0016020///membrane
179882	T22G5.1	NM_074038.1	1	NC_003283.11	13876837	13877949	0	0	0	0.94	0.63	0.93	7.40298	2.31755e-19					GO:0016020///membrane+++GO:0016021///integral component of membrane	GO:0008889///glycerophosphodiester phosphodiesterase activity+++GO:0008081///phosphoric diester hydrolase activity	GO:0006629///lipid metabolic process
183344	scl-7	NM_070108.1	1	NC_003282.8	13070479	13071221	0.15	0	0.05	3.33	5.25	7.47	6.33172	4.0782e-75					GO:0005615///extracellular space
179865	dct-17	NM_001028706.4+++NM_001028707.4+++NM_001028708.4+++NM_001028709.3	4	NC_003283.11	13727813	13730773	5.83	3.78	7.66	11.13	13.23	14	1.15464	4.47801e-107					GO:0045121///membrane raft		GO:0045087///innate immune response
181307	col-178	BGIR6239_29971+++BGIR6239_29972+++NM_077468.5	3	NC_003284.9	11199476	11202442	1749.02	4134.34	1733.23	1062.96	1028.48	1045.34	-1.30365	0					GO:0016021///integral component of membrane+++GO:0031012///extracellular matrix+++GO:0005615///extracellular space+++GO:0005581///collagen trimer+++GO:0016020///membrane	GO:0042302///structural constituent of cuticle+++GO:0005201///extracellular matrix structural constituent	GO:0030198///extracellular matrix organization
190598	Y71G12B.5	NM_058496.3	1	NC_003279.8	1799717	1805470	0.1	0.12	0.05	0.35	0.5	0.37	2.18119	3.79484e-16
177844	msp-77	NM_069380.3	1	NC_003282.8	9894631	9895014	406.83	431.25	367.87	892.12	907.42	848.27	1.08615	0					GO:0005856///cytoskeleton+++GO:0005737///cytoplasm+++GO:0031143///pseudopodium+++GO:0042995///cell projection		GO:0045987///positive regulation of smooth muscle contraction+++GO:0001556///oocyte maturation+++GO:0043410///positive regulation of MAPK cascade
182055	C01B4.8	NM_001316781.1+++NM_071281.1	2	NC_003283.11	2490512	2492701	0.85	0.84	1.19	2.43	2.94	2.91	1.51884	2.98938e-31					GO:0016020///membrane+++GO:0016021///integral component of membrane	GO:0022857///transmembrane transporter activity	GO:0055085///transmembrane transport
178803	cyp-35B1	NM_001322546.1	1	NC_003283.11	3939127	3941184	0.54	0.38	0.67	1.31	1.64	1.44	1.46152	6.76207e-17						GO:0016705///oxidoreductase activity, acting on paired donors, with incorporation or reduction of molecular oxygen+++GO:0008395///steroid hydroxylase activity+++GO:0005506///iron ion binding+++GO:0020037///heme binding
173531	bath-26	NM_061604.4	1	NC_003280.10	1599578	1600697	1	0.09	0.96	1.35	1.27	1.6	1.03867	2.23622e-06
186080	F49H6.13	NM_074903.1	1	NC_003283.11	17008673	17009388	0	0	0	0.53	0.49	0.57	5.61291	1.02124e-06					GO:0016020///membrane+++GO:0016021///integral component of membrane		GO:0045087///innate immune response
190521	Y67D8C.7	NM_067887.2	1	NC_003282.8	3065568	3066896	0.14	0	0	0.44	1.09	2.37	4.78283	2.20892e-13
187635	arrd-11	NM_064482.2	1	NC_003280.10	13763427	13765552	0.13	0.02	0.11	0.58	0.39	0.45	2.44298	1.24252e-09
177826	kin-21	NM_069357.2	1	NC_003282.8	9832935	9834822	7.65	6.7	7.07	2.09	1.78	1.99	-1.87364	8.32291e-123					GO:0031234///extrinsic component of cytoplasmic side of plasma membrane	GO:0000166///nucleotide binding+++GO:0004672///protein kinase activity+++GO:0016301///kinase activity+++GO:0005524///ATP binding+++GO:0004715///non-membrane spanning protein tyrosine kinase activity+++GO:0004713///protein tyrosine kinase activity+++GO:0016740///transferase activity	GO:0006468///protein phosphorylation+++GO:0042127///regulation of cell proliferation+++GO:0018108///peptidyl-tyrosine phosphorylation+++GO:0016310///phosphorylation
178462	fipr-28	NM_070567.4	1	NC_003282.8	16628009	16628378	0.38	0.58	0.13	2.36	3.21	3.99	3.06747	1.19841e-13
3565006	ins-28	NM_001026679.1	1	NC_003279.8	14012463	14013292	4	6.02	7.14	2.12	1.95	1.87	-1.62741	6.26867e-06					GO:0005576///extracellular region	GO:0005179///hormone activity	GO:0010469///regulation of signaling receptor activity
188603	lgc-32	NM_075738.2	1	NC_003284.9	673043	676428	2.78	3.3	3.67	6.28	8.76	5.84	1.08174	9.45999e-37					GO:0016020///membrane+++GO:0045202///synapse+++GO:0016021///integral component of membrane+++GO:0005887///integral component of plasma membrane+++GO:0043005///neuron projection	GO:0004888///transmembrane signaling receptor activity+++GO:0005230///extracellular ligand-gated ion channel activity+++GO:0005216///ion channel activity+++GO:0005254///chloride channel activity	GO:1902476///chloride transmembrane transport+++GO:0042391///regulation of membrane potential+++GO:0006811///ion transport+++GO:0007268///chemical synaptic transmission+++GO:0050877///nervous system process+++GO:0034220///ion transmembrane transport+++GO:0007165///signal transduction
178062	tag-89	NM_069746.1	1	NC_003282.8	11394554	11396629	0.51	0.62	0.83	1.51	1.62	1.39	1.19022	2.74596e-10					GO:0016020///membrane+++GO:0016021///integral component of membrane	GO:0004930///G protein-coupled receptor activity	GO:0007186///G protein-coupled receptor signaling pathway
13179739	W05F2.8	NM_001262424.1+++NM_001313516.1	2	NC_003279.8	3362369	3363362	0	0.31	0	1.12	2.24	1.56	3.86608	1.23115e-11					GO:0000793///condensed chromosome+++GO:0005637///nuclear inner membrane	GO:0035064///methylated histone binding+++GO:0003682///chromatin binding	GO:0010468///regulation of gene expression+++GO:0097240///chromosome attachment to the nuclear envelope
188914	T26A8.3	NM_069032.2	1	NC_003282.8	8425132	8426181	0	0	0	1.66	3.6	4.51	7.84812	4.58534e-25
184913	F25A2.1	NM_070989.3	1	NC_003283.11	1179629	1181533	4.76	10.05	5.15	1.76	1.4	2.41	-1.85215	9.27357e-57						GO:0016787///hydrolase activity	GO:0006629///lipid metabolic process
191679	his-34	NM_069008.1	1	NC_003282.8	8335972	8336340	3.23	4.35	3.12	8.18	7.2	7.96	1.07459	3.1947e-10					GO:0005634///nucleus+++GO:0000786///nucleosome+++GO:0000785///chromatin	GO:0003677///DNA binding+++GO:0046982///protein heterodimerization activity	GO:0006334///nucleosome assembly
173731	F53C3.6	NM_062286.3	1	NC_003280.10	3898161	3899566	0.56	0.27	0.41	0.08	0	0.12	-2.60432	1.97357e-05					GO:0016020///membrane+++GO:0016021///integral component of membrane
177153	clec-73	NM_068044.3	1	NC_003282.8	3954084	3956190	49.11	40.14	50.02	15.88	14.41	18.28	-1.52191	0						GO:0030246///carbohydrate binding
174228	ZK1290.11	NM_063185.2	1	NC_003280.10	7560925	7561594	0	0	0	0.8	0.36	0.87	6.19787	1.6564e-09
184591	F16H6.4	NM_001313152.1+++NM_001313153.1	2	NC_003283.11	18198721	18205426	0.32	0.65	0.26	0.02	0.11	0.11	-2.37061	2.02987e-08							GO:0006508///proteolysis
180033	cpr-3	NM_074389.3	1	NC_003283.11	15297006	15298616	8.73	7.84	11.04	19.78	19.24	25.23	1.21412	5.27624e-127	04142///Lysosome+++04924///Renin secretion+++04140///Autophagy - animal+++04612///Antigen processing and presentation+++04210///Apoptosis+++04621///NOD-like receptor signaling pathway	H00932///Tropical calcific pancreatitis			GO:0005615///extracellular space+++GO:0005764///lysosome	GO:0008233///peptidase activity+++GO:0004197///cysteine-type endopeptidase activity+++GO:0016787///hydrolase activity+++GO:0008234///cysteine-type peptidase activity	GO:0045087///innate immune response+++GO:0006508///proteolysis+++GO:0051603///proteolysis involved in cellular protein catabolic process
191466	ZK930.6	NM_064137.2	1	NC_003280.10	11885588	11886336	4.48	5.05	3.44	1.98	1.64	2.43	-1.1185	2.39937e-12						GO:0004252///serine-type endopeptidase activity+++GO:0005524///ATP binding+++GO:0004176///ATP-dependent peptidase activity	GO:0006508///proteolysis+++GO:0030163///protein catabolic process
174904	Y46G5A.7	NM_064312.3	1	NC_003280.10	12755219	12756157	0.07	0.14	0.39	0	0	0	-5.05952	6.40849e-05
191678	his-33	NM_069007.1	1	NC_003282.8	8335335	8335718	1.35	2.47	1.57	3.97	5.33	4.32	1.2772	1.72004e-08	04217///Necroptosis				GO:0000786///nucleosome+++GO:0000790///nuclear chromatin	GO:0046982///protein heterodimerization activity+++GO:0003677///DNA binding	GO:0006355///regulation of transcription, DNA-templated+++GO:0006281///DNA repair+++GO:0006342///chromatin silencing
187293	K11D12.6	NM_071949.5	1	NC_003283.11	5034554	5035158	0	0.06	0	3.68	3.93	5.19	7.7895	1.89888e-47						GO:0004867///serine-type endopeptidase inhibitor activity	GO:0010951///negative regulation of endopeptidase activity
188091	T05A8.6	NM_061944.2	1	NC_003280.10	2738589	2739642	0.05	0	0.16	0.58	0.49	0.3	2.72838	5.48989e-05
13182108	M04D5.1	NM_001264693.1	1	NC_003279.8	11334617	11337431	0.2	0.65	0.29	0.06	0.18	0.08	-1.83455	0.000104419	04141///Protein processing in endoplasmic reticulum	H01572///Cole-Carpenter syndrome			GO:0005783///endoplasmic reticulum	GO:0003756///protein disulfide isomerase activity+++GO:0031545///peptidyl-proline 4-dioxygenase activity	GO:0034976///response to endoplasmic reticulum stress+++GO:0006457///protein folding+++GO:0019511///peptidyl-proline hydroxylation+++GO:1902175///regulation of oxidative stress-induced intrinsic apoptotic signaling pathway
187765	swt-6	NM_074063.5	1	NC_003283.11	13954365	13956097	2.35	1.58	2.35	7.83	8.04	8.48	1.93766	1.91589e-52					GO:0016020///membrane+++GO:0005886///plasma membrane+++GO:0016021///integral component of membrane	GO:0051119///sugar transmembrane transporter activity	GO:0034219///carbohydrate transmembrane transport+++GO:0008643///carbohydrate transport
13218657	Y116F11B.17	NM_001269958.1	1	NC_003283.11	19820613	19822106	2	3.26	3.71	0.91	0.65	1.34	-1.69452	0.000967371
174887	F15A4.6	NM_064257.7	1	NC_003280.10	12471824	12473016	26.1	44.35	26.92	7.37	9.13	7.96	-2.04387	8.25424e-130
181541	frpr-17	NM_077999.3	1	NC_003284.9	14406177	14409449	0.46	0.36	0.52	0.92	1.1	1.05	1.19233	1.85042e-07					GO:0016020///membrane+++GO:0016021///integral component of membrane	GO:0004930///G protein-coupled receptor activity	GO:0007186///G protein-coupled receptor signaling pathway
186450	F57E7.1	NM_001276978.1+++NM_074768.1	2	NC_003283.11	16481606	16482000	0.46	0.86	1.53	0	0	0.15	-4.43149	7.88699e-06
177198	trpl-2	NM_068140.3	1	NC_003282.8	4326716	4331893	1.03	0.54	1.5	2.32	1.76	2.3	1.06581	7.3505e-25					GO:0016020///membrane+++GO:0016021///integral component of membrane
189483	Y19D10A.5	NM_001316834.1+++NM_071255.2	2	NC_003283.11	2382233	2384422	0.85	0.84	1.19	2.43	2.94	2.91	1.51884	2.98938e-31					GO:0016021///integral component of membrane	GO:0022857///transmembrane transporter activity	GO:0006820///anion transport+++GO:0055085///transmembrane transport
189951	Y46D2A.1	NM_062105.4	1	NC_003280.10	3324468	3326391	0.06	0.3	0.08	0.4	0.71	0.44	1.78283	6.72488e-06					GO:0045121///membrane raft		GO:0045087///innate immune response
3565543	F36G3.3	NM_001029462.2	1	NC_003284.9	9798950	9801038	0.47	0.37	0.16	1.53	1.19	0.61	1.68506	0.000191667	04142///Lysosome	H00264///Charcot-Marie-Tooth disease (CMT)			GO:0016021///integral component of membrane+++GO:0016020///membrane
3565015	F26D10.13	NM_001027975.1	1	NC_003282.8	17264297	17264799	0	0	0	1.78	4.92	4.54	8.08323	1.08482e-28
186565	F59A1.13	NM_075074.2	1	NC_003283.11	17687263	17690948	0.73	1	1.46	4.93	4.56	4.34	2.10902	2.55663e-83					GO:0016021///integral component of membrane+++GO:0016020///membrane	GO:0022857///transmembrane transporter activity	GO:0055085///transmembrane transport
176417	T16G12.3	NM_066830.3	1	NC_003281.10	10052067	10053075	37.43	45.23	32.6	2.99	3.16	2.52	-3.76716	0
183268	C36C5.12	NM_071468.2	1	NC_003283.11	3158449	3159162	1.34	1.31	1.26	2.57	2.74	3.1	1.0838	9.87199e-08					GO:0016021///integral component of membrane+++GO:0016020///membrane
180130	fbxa-206	NM_074874.4	1	NC_003283.11	16917273	16918474	10.38	12.29	13.78	0.5	0.16	0.1	-5.5827	0
178243	K08D8.5	NM_070061.3	1	NC_003282.8	12910690	12912109	3.51	5.26	5.1	12.28	15.62	13.87	1.57598	7.95159e-109							GO:0045087///innate immune response
180151	Y20C6A.1	NM_001269812.1+++NM_001269813.1	2	NC_003283.11	17371605	17376703	1.29	0.85	1.24	3.47	3.15	3.05	1.52355	1.11515e-81
6418667	ZK686.6	NM_001129278.1	1	NC_003281.10	7771591	7772559	0.5	0.86	0.77	0.06	0.03	0.03	-4.05952	3.75147e-15
184665	F19B2.7	NM_001356790.1	1	NC_003283.11	20151732	20155442	0.19	0.34	0.39	0.12	0	0	-2.97206	6.16919e-05						GO:0005524///ATP binding+++GO:0004252///serine-type endopeptidase activity+++GO:0004176///ATP-dependent peptidase activity	GO:0030163///protein catabolic process+++GO:0006508///proteolysis
13219566	F47G3.4	NM_001270065.2	1	NC_003284.9	2381590	2382292	8.41	15.41	6.34	4.19	5.87	4.96	-1.08657	2.04695e-11
191559	ZK1307.2	NM_063679.4	1	NC_003280.10	9653165	9653871	2.32	0.64	3.23	5.03	4.37	3.76	1.06137	2.09342e-06
180087	F21H7.2	NM_074693.3	1	NC_003283.11	16227154	16229569	13.45	14.83	12.75	6.72	5.77	6.25	-1.13885	1.59014e-104
6418646	C05B5.11	NM_001129203.2	1	NC_003281.10	10004525	10004931	0	0	0	13.21	15.92	26.22	10.0166	3.69011e-84
176665	Y49E10.10	NM_067216.4	1	NC_003281.10	12396057	12398983	11.06	9.5	8.49	4.84	4.99	4.24	-1.06087	9.50048e-55
353443	F25E5.7	NM_182435.1	1	NC_003283.11	7440120	7441483	0.05	0.1	0.15	2.56	3.1	4.57	5.10832	9.5561e-96
178716	clec-209	NM_071249.1	1	NC_003283.11	2351676	2352932	38.66	113.42	42.39	364.1	465.51	431.55	2.67154	0						GO:0030246///carbohydrate binding	GO:0045087///innate immune response
180090	F21H7.5	NM_074697.6	1	NC_003283.11	16237615	16238712	124.49	136.48	114.55	41.35	32.78	34.84	-1.80014	0					GO:0005856///cytoskeleton
185869	F46F5.16	NM_061408.1	1	NC_003280.10	787312	787994	0.24	0.82	0.25	2.19	1.57	1.42	1.94355	1.99354e-09					GO:0016021///integral component of membrane+++GO:0016020///membrane
175183	F40G9.7	NM_064764.4	1	NC_003281.10	165690	166232	0	0	0	0.65	0.76	0.48	5.72838	3.4073e-07
185688	F42H11.1	NM_060137.1	1	NC_003279.8	9576357	9577889	0.45	0.25	0.27	1.29	1.56	1.06	1.99339	1.95767e-14					GO:0016020///membrane+++GO:0016021///integral component of membrane
182533	nhr-152	NM_072589.2	1	NC_003283.11	7686506	7688159	0.63	0.46	0.62	1.3	1.59	0.89	1.12748	8.21024e-08					GO:0005634///nucleus	GO:0046872///metal ion binding+++GO:0043565///sequence-specific DNA binding+++GO:0008270///zinc ion binding+++GO:0003700///DNA-binding transcription factor activity+++GO:0003677///DNA binding	GO:0006355///regulation of transcription, DNA-templated
186416	gmd-2	NM_060705.1	1	NC_003279.8	12292269	12293936	1.12	0	1.07	9.77	12.09	12.54	3.97322	3.331e-288	01100///Metabolic pathways+++00051///Fructose and mannose metabolism+++00520///Amino sugar and nucleotide sugar metabolism			R00888///GDP-alpha-D-mannose 4,6-hydro-lyase (GDP-4-dehydro-alpha-D-rhamnose-forming); GDP-mannose GDP-mannose <=> GDP-4-dehydro-6-deoxy-D-mannose + H2O	GO:0005737///cytoplasm	GO:0008446///GDP-mannose 4,6-dehydratase activity+++GO:0016829///lyase activity	GO:0042350///GDP-L-fucose biosynthetic process+++GO:0019673///GDP-mannose metabolic process+++GO:0042351///'de novo' GDP-L-fucose biosynthetic process
180025	clec-47	NM_074343.4	1	NC_003283.11	15175762	15176290	48.64	9.4	72.6	77.67	100.88	88.49	1.01624	1.38367e-141					GO:0016021///integral component of membrane+++GO:0016020///membrane	GO:0030246///carbohydrate binding
185510	bath-13	NM_061886.1	1	NC_003280.10	2520965	2522044	3.41	2.77	2.51	1.22	1.06	1.14	-1.35908	3.62092e-17							GO:0016567///protein ubiquitination
182849	abt-1	NM_001306925.1+++NM_001306926.1	2	NC_003282.8	10206231	10214911	7.19	4.46	7.92	3.24	3.76	2.73	-1.0133	3.74658e-133					GO:0016021///integral component of membrane+++GO:0043231///intracellular membrane-bounded organelle+++GO:0016020///membrane	GO:0005319///lipid transporter activity+++GO:0016887///ATPase activity+++GO:0000166///nucleotide binding+++GO:0042626///ATPase activity, coupled to transmembrane movement of substances+++GO:0005524///ATP binding	GO:0006869///lipid transport+++GO:0016246///RNA interference+++GO:0055085///transmembrane transport

## Sheet: lncRNA
Gene	N2-1 Expression	N2-2 Expression	N2-3 Expression	CN30-1 Expression	CN30-2 Expression	CN30-3 Expression
LXLOC_016124	61.03	71.48	56.59	0.16	0.2	0.28
LXLOC_010217	48.29	55.86	69.36	8.02	8.34	8.6
LXLOC_018967	22.24	25.21	21.15	0	0.01	0
LXLOC_007909	25.83	23.63	28.98	12.92	13.84	10.95
LXLOC_014271	20.88	22.09	19.06	9.01	7.26	8.24
LXLOC_006822	19.74	24.01	23.28	9.16	12.28	11.16
LXLOC_008192	10.67	8.1	12.21	5.1	4.53	5.31
LXLOC_000449	9.01	6.87	8.33	3.24	3.22	3.5
LXLOC_001914	8.66	8.56	7.78	3.93	4.4	4.06
LXLOC_019018	2.67	4.34	4.02	0	0	0
LXLOC_012222	2.57	2.77	3.49	0.19	0	0
LXLOC_017056	4.79	3.61	5.16	1.54	2.05	1.73
LXLOC_010201	3.7	2.47	2.28	0	0.11	0.3
LXLOC_001295	4.14	5.18	4.46	2.41	2.13	1.73
LXLOC_005089	2.88	1.52	2.78	0.3	0.56	0.28
LXLOC_008493	6.05	5	5.89	3.15	3.47	4.43
LXLOC_019311	2.36	2.97	3.51	1.31	0.48	1.32
LXLOC_003507	3	3.49	2	0.89	1.12	0.93
LXLOC_018842	1.62	2.52	1.7	0.33	0.28	0.31
LXLOC_004848	2.72	2.31	2.45	0.84	0.99	0.88
LXLOC_007116	1.91	0.92	2.1	0.07	0.2	0.07
LXLOC_002360	3.97	2.47	2.62	1.75	1.39	1.35
LXLOC_018906	2.46	1.42	2.83	0.58	1.14	0.48
LXLOC_011591	2.3	3.36	2.54	1.48	1.4	1.09
LXLOC_011697	2.72	3.3	1.79	0.77	1.68	1.42
LXLOC_000428	1.11	1.78	1.53	0.31	0.11	0.29
LXLOC_005092	1.24	1.3	1.6	0.13	0.15	0.18
LXLOC_002052	0.59	1.18	2.12	0.36	0.26	0.34
LXLOC_010053	2.03	2.15	1.58	0.85	0.85	1.15
LXLOC_018905	0.76	0.66	1.53	0.13	0	0
LXLOC_011498	1.19	2.59	1.6	0.83	0.86	0.87
LXLOC_015659	1.77	0.94	1.93	0.54	1.13	0.43
LXLOC_001251	0.61	1.05	0.61	0.06	0.12	0.04
LXLOC_009792	1.44	1.31	1.15	0.86	0.71	0.35
LXLOC_013517	1.03	1.06	0.88	0.42	0.42	0.52
LXLOC_008843	0.61	1.33	0.61	0.37	0.13	0.47
LXLOC_009011	0.77	0.85	1.02	0.37	0.19	0.58
LXLOC_010358	0.58	0.63	0.29	0.04	0	0
LXLOC_008562	1.06	0.84	0.6	0.37	0.45	0.27
LXLOC_005090	0.31	0.65	1.02	0.26	0.2	0.12
LXLOC_003692	0.78	0.83	0.98	0.44	0.39	0.41
LXLOC_001209	0.6	0.55	0.55	0.08	0.08	0.2
LXLOC_014862	0.35	0.86	0.12	0	0	0
LXLOC_002499	0.79	0.5	0.52	0.2	0.25	0.04
LXLOC_005912	0.56	0.61	1.25	0.46	0.35	0.3
LXLOC_019543	0.81	0.65	0.91	0.33	0.4	0.35
LXLOC_008664	0.79	0.63	0.63	0.27	0.22	0.35
LXLOC_000839	0.43	0.52	0.42	0.12	0.15	0
LXLOC_012217	0.59	0.55	0.71	0.22	0.31	0.31
LXLOC_016223	0.63	0.07	0.14	0	0	0
LXLOC_017179	0.48	0.39	0.49	0.24	0.15	0.17
LXLOC_019845	0.26	0.68	0.3	0.17	0.18	0.1
LXLOC_009228	0.38	0.17	0.55	0.12	0.11	0.1
LXLOC_012112	0.3	0.35	0.18	0.07	0.03	0.04
LXLOC_007824	0.34	0.53	0.21	0.19	0.1	0.16
LXLOC_008341	0.28	0.24	0.26	0.12	0.05	0.06
LXLOC_001746	0.05	0.03	0.05	0.12	0.22	0.1
LXLOC_018532	0.1	0.04	0.11	0.15	0.17	0.28
LXLOC_009133	0.09	0.04	0.16	0.18	0.33	0.18
LXLOC_008797	0.02	0.11	0.09	0.15	0.28	0.19
LXLOC_006434	0.1	0.14	0.1	0.24	0.3	0.21
LXLOC_004034	0.08	0.03	0.08	0.21	0.22	0.18
LXLOC_010549	0	0	0	0.1	0.16	0.17
LXLOC_008178	0.03	0.06	0.08	0.2	0.24	0.18
LXLOC_003986	0.08	0.04	0.02	0.22	0.22	0.17
LXLOC_017752	0.1	0.07	0.02	0.22	0.21	0.26
LXLOC_008044	0.19	0.11	0.14	0.28	0.45	0.22
LXLOC_019159	0.19	0.22	0.09	0.4	0.34	0.27
LXLOC_017308	0.15	0.07	0.11	0.32	0.25	0.29
LXLOC_021022	0.06	0.16	0.09	0.39	0.25	0.21
LXLOC_011722	0.14	0.03	0.13	0.34	0.24	0.28
LXLOC_013578	0	0	0	0.23	0.24	0.1
LXLOC_018802	0.09	0.11	0.06	0.27	0.36	0.21
LXLOC_004804	0.18	0.21	0.13	0.35	0.37	0.39
LXLOC_001606	0	0.04	0	0.22	0.28	0.13
LXLOC_006974	0	0.09	0.02	0.36	0.15	0.19
LXLOC_011799	0.19	0.13	0.16	0.4	0.35	0.34
LXLOC_018794	0.07	0.11	0.07	0.22	0.29	0.35
LXLOC_019146	0	0.14	0.04	0.23	0.16	0.43
LXLOC_017081	0.06	0.02	0.04	0.17	0.25	0.36
LXLOC_009488	0.21	0.08	0.15	0.25	0.57	0.29
LXLOC_014563	0.06	0.03	0.09	0.15	0.5	0.2
LXLOC_012605	0.23	0.02	0.19	0.34	0.48	0.29
LXLOC_007256	0.1	0.04	0.13	0.25	0.58	0.12
LXLOC_000466	0.03	0	0	0.17	0.41	0.14
LXLOC_010802	0.1	0.07	0.07	0.18	0.61	0.24
LXLOC_016629	0	0	0	0.37	0.19	0.23
LXLOC_009014	0.26	0.21	0.3	0.51	0.65	0.43
LXLOC_019609	0.11	0	0	0.22	0.46	0.26
LXLOC_001465	0.03	0.06	0.21	0.37	0.41	0.35
LXLOC_014627	0.07	0.04	0.07	0.26	0.24	0.52
LXLOC_006337	0	0	0	0.66	0.14	0.06
LXLOC_010827	0.36	0.08	0.37	0.43	0.59	0.66
LXLOC_004210	0.3	0.14	0.29	0.42	0.59	0.61
LXLOC_022065	0.32	0	0.39	0.59	0.61	0.41
LXLOC_003814	0.19	0.16	0.36	0.45	0.75	0.41
LXLOC_002352	0.13	0.04	0.21	0.39	0.6	0.3
LXLOC_020725	0.32	0.04	0.2	0.44	0.42	0.61
LXLOC_014367	0.35	0.1	0.47	0.61	0.58	0.65
LXLOC_021729	0.36	0.16	0.38	0.67	0.74	0.41
LXLOC_017328	0.41	0.12	0.22	0.54	0.61	0.54
LXLOC_010803	0.14	0.1	0.07	0.49	0.4	0.37
LXLOC_017788	0.12	0.12	0.3	0.42	0.59	0.48
LXLOC_011115	0.04	0.08	0	0.64	0.29	0.15
LXLOC_021150	0.05	0.02	0.09	0.44	0.31	0.38
LXLOC_019878	0.14	0.42	0.23	0.43	0.81	0.53
LXLOC_001854	0	0	0	0.26	0.27	0.46
LXLOC_019639	0.11	0.05	0	0.22	0.63	0.31
LXLOC_009918	0.17	0.16	0.21	0.64	0.53	0.41
LXLOC_020843	0.13	0.08	0.02	0.25	0.35	0.7
LXLOC_016372	0.21	0.12	0.15	0.37	0.74	0.45
LXLOC_011412	0.09	0.05	0.14	0.48	0.7	0.2
LXLOC_014787	0.39	0.23	0.24	0.73	0.76	0.47
LXLOC_000236	0.12	0.29	0.19	0.53	0.72	0.45
LXLOC_010595	0.1	0.03	0.03	0.7	0.31	0.26
LXLOC_020896	0.41	0.17	0.14	0.55	0.62	0.66
LXLOC_000667	0.47	0.15	0.39	0.59	0.86	0.67
LXLOC_015098	0.12	0	0	0.62	0.39	0.23
LXLOC_016344	0.33	0.08	0.25	0.47	0.79	0.53
LXLOC_012843	0.12	0.06	0.03	0.4	0.25	0.7
LXLOC_013015	0.6	0.17	0.12	0.71	0.67	0.68
LXLOC_005225	0.14	0	0.19	0.34	0.41	0.75
LXLOC_000305	0.17	0.33	0.09	0.84	0.32	0.64
LXLOC_004509	0.29	0.11	0.3	0.79	0.62	0.54
LXLOC_011844	0.38	0.33	0.47	0.95	0.88	0.6
LXLOC_005362	0.15	0	0.02	0.45	0.47	0.51
LXLOC_009195	0.12	0.29	0.09	0.45	0.62	0.69
LXLOC_013774	0.16	0.05	0.16	0.6	0.57	0.47
LXLOC_005956	0.15	0.14	0.17	0.49	0.85	0.41
LXLOC_011690	0.46	0.21	0.17	0.52	0.95	0.67
LXLOC_009851	0.16	0.12	0.19	0.6	0.61	0.57
LXLOC_002501	0.18	0.22	0.05	0.42	1.01	0.35
LXLOC_019078	0.42	0.24	0.52	0.62	1.18	0.72
LXLOC_013344	0.39	0.28	0.32	0.77	0.63	0.93
LXLOC_014596	0.14	0.1	0.23	0.67	0.6	0.55
LXLOC_019770	0.22	0.04	0.23	0.55	0.62	0.7
LXLOC_011156	0.26	0.49	0.49	0.92	0.92	0.78
LXLOC_001120	0.25	0.03	0.18	0.8	0.53	0.52
LXLOC_001751	0.57	0.22	0.35	0.85	0.89	0.81
LXLOC_011926	0	0	0.11	0.33	0.69	0.51
LXLOC_014506	0.19	0.17	0	0.29	0.8	0.71
LXLOC_021282	0.28	0.26	0.15	0.58	0.83	0.76
LXLOC_013865	0.08	0.15	0.08	0.65	0.85	0.3
LXLOC_010337	0	0	0	1.26	0.19	0.08
LXLOC_020947	0.18	0.17	0.18	0.61	0.62	0.84
LXLOC_009500	0.34	0.11	0.57	1.01	0.97	0.58
LXLOC_000395	0.16	0.45	0.14	0.68	0.87	0.75
LXLOC_005249	0.26	0.2	0.21	0.7	0.92	0.6
LXLOC_002739	0.21	0	0.28	1	0.52	0.54
LXLOC_021411	0.58	0.29	0.28	0.92	1.17	0.68
LXLOC_015188	0.31	0	0.16	0.71	0.5	0.89
LXLOC_006720	0.47	0.72	0.39	0.99	1.33	0.91
LXLOC_010590	0.13	0.01	0.18	0.53	0.84	0.61
LXLOC_016143	0.2	0.54	0.13	0.67	0.9	0.96
LXLOC_012710	0.08	0.26	0.27	0.55	0.76	0.97
LXLOC_020780	0.2	0.14	0	0.46	0.59	0.98
LXLOC_012159	0	0	0	0.55	0.48	0.69
LXLOC_005063	0.28	0.69	0.2	0.72	0.87	1.31
LXLOC_011843	0.25	0.31	0.36	0.83	1.24	0.59
LXLOC_021957	0.08	0.08	0	0.43	0.45	1.04
LXLOC_002781	0.51	0.58	0.53	1.21	0.93	1.24
LXLOC_003407	0.32	0.3	0.41	0.79	1.01	1.01
LXLOC_004929	0.1	0.09	0.19	0.49	1.04	0.64
LXLOC_004050	0.7	0.38	0.13	0.99	0.96	1.05
LXLOC_006697	0.46	0.4	0.04	0.77	0.93	1.02
LXLOC_020440	0.17	0.09	0.4	0.68	1.12	0.68
LXLOC_008167	0.42	0.35	0.15	0.7	1.17	0.88
LXLOC_019862	0.77	0.38	0.56	0.97	1.57	1.01
LXLOC_006605	0.43	0.5	0.8	1.29	1.21	1.08
LXLOC_003579	0.6	0.36	0.26	1	1.02	1.06
LXLOC_008421	0	0.07	0.16	0.57	0.6	0.92
LXLOC_006213	0.48	0.08	0.41	0.77	1.33	0.74
LXLOC_010866	0	0.12	0	0.26	1.26	0.48
LXLOC_011413	0.23	0.18	0.25	0.8	1.29	0.49
LXLOC_006899	0.45	0.55	0.5	1.02	1.29	1.13
LXLOC_015260	0.27	0.7	0.07	1.09	0.53	1.36
LXLOC_011993	0.64	0.1	0	0.88	0.93	0.92
LXLOC_022019	0.07	0	0.28	0.77	0.88	0.86
LXLOC_005294	0.31	0.16	0.3	1.19	1.1	0.65
LXLOC_006990	0.37	0.45	0.33	1.12	1.13	1.1
LXLOC_004331	0.63	0.24	0.89	1.42	1.24	1.31
LXLOC_003938	0.76	0.25	0.75	1.4	1.18	1.44
LXLOC_010085	0.12	0.45	0.28	0.56	1.03	1.53
LXLOC_004419	0.93	0.17	0.91	1.36	1.64	1.29
LXLOC_020277	0.17	0	0	0.73	0.77	0.98
LXLOC_012078	0.06	0	0.03	0.65	0.9	0.87
LXLOC_020603	0.11	0.2	0	0.33	0.47	1.84
LXLOC_007300	0.28	0.35	0.19	1.05	1.11	1.07
LXLOC_002883	0.31	0.44	0.21	1.1	1.24	1.12
LXLOC_010907	0.27	0.54	0.3	1.2	1.84	0.71
LXLOC_022474	0	0.19	0	0.23	1.48	1.24
LXLOC_011698	0.27	0.3	0.12	1.33	1.08	1.04
LXLOC_011701	0.53	0.1	0.11	1.2	1.5	0.81
LXLOC_007342	1.09	0.52	1.11	1.68	1.92	1.91
LXLOC_008075	0	0	0	0.95	0.5	1.47
LXLOC_022083	0.46	0.35	0.56	1.63	1.72	0.98
LXLOC_015890	0.18	0.25	0.74	1.22	1.19	1.76
LXLOC_020885	0.33	0.55	0.66	1.19	1.4	1.96
LXLOC_008334	0.24	0.15	0.18	1.08	1.56	1.01
LXLOC_020763	0.15	0.36	0.08	1.11	1.16	1.41
LXLOC_019364	0.01	0	0.02	1.18	1.13	1.08
LXLOC_001274	0.79	0.33	1.07	1.46	2.11	2.04
LXLOC_006975	0.61	0.99	1	1.83	2.44	1.79
LXLOC_019221	0.06	0	0	0.99	1.93	0.7
LXLOC_013734	0.18	0.25	0.45	0.46	2.44	1.55
LXLOC_018877	1.35	0.65	1.15	1.67	2.36	3
LXLOC_021237	0.09	0.25	0.09	0.38	1.79	2.28
LXLOC_004375	0.1	0.96	0.42	1.61	2.49	1.49
LXLOC_003923	1.14	0.54	1.41	1.86	3.34	2.45
LXLOC_022542	0.5	1.21	0.59	1.41	2.43	3.14
LXLOC_012296	0	0.17	0.19	1.09	2.41	1.66
LXLOC_017659	0.38	1.03	0.13	2.47	2.48	1.55
LXLOC_012493	0.93	1.01	0.4	1.23	3.82	2.25
LXLOC_017758	0.02	0.02	0	1.16	1.83	2.08
LXLOC_018149	0.83	1.33	0.42	1.94	3.39	2.71
LXLOC_014352	1.01	1.04	0.58	3.74	1.91	2.59
LXLOC_004372	0.61	1.45	0.37	1.9	3.77	2.8
LXLOC_019431	0.88	2.03	1.22	2.16	3.49	4.73
LXLOC_013598	0.93	0.65	0.39	3.18	2.76	2.35
LXLOC_005265	0.33	0.02	0.28	2.27	2.86	1.94
LXLOC_021706	0.99	0.85	1.14	3.09	4.65	1.9
LXLOC_021236	0.16	0.38	0.41	2.9	1.74	3.58
LXLOC_016037	1.26	1.26	0.25	2.48	3.19	4.56
LXLOC_011871	0.44	1.43	1.04	3.7	3.94	2.89
LXLOC_019026	0.7	1.07	0.8	3.73	3.19	4.13
LXLOC_014270	3.31	1.04	3.51	5.72	3.85	6.95
LXLOC_020274	0.71	0.56	0.64	3.77	3.72	3.51
LXLOC_005714	0	0	0	2.45	2.79	4.58
LXLOC_007856	1.74	1.33	1.35	4.67	6.46	4.21
LXLOC_020751	1.79	1.93	1.41	4.99	5.07	6.75
LXLOC_022248	0.76	0.86	1.16	4.09	5.48	5.04
LXLOC_022585	0.43	0.52	2.02	5.69	6.68	5.87
LXLOC_015565	6.46	0.65	7.65	8.96	13.22	8.53
LXLOC_022378	1	1.53	1.23	5.84	6.66	8.35
LXLOC_008705	0.94	1.23	0.47	7.35	4.97	8.04
LXLOC_019525	1.65	1.83	1.07	5.98	9.95	7.98
LXLOC_006964	4.38	7.49	5.32	10.58	14.85	12.59
LXLOC_004300	1.69	1.38	2.08	7.95	9.75	9.84
LXLOC_002338	4.11	7.12	3.36	12.26	12.45	14.17
LXLOC_003354	7.21	7.91	8.69	16.79	18.32	16.47
LXLOC_021662	8.47	5.06	12.63	16.78	22.38	16.45
LXLOC_014234	3.51	0.94	1.3	18.97	12.71	18.37
LXLOC_019410	18.17	18.27	17.71	36.02	32.37	45.96
LXLOC_021304	68.46	98.44	79.04	278.95	310.6	348.98
LXLOC_022668	267.88	385.07	349.88	654.13	800	769.6

## Sheet: miRNA
Gene	N2-1 Expression	N2-2 Expression	N2-3 Expression	CN30-1 Expression	CN30-2 Expression	CN30-3 Expression
cel-miR-124-3p	282.5	2067.94	55.33	2339.79	2177.29	2522.5
cel-miR-235-5p	30.43	33.64	65.6	119.54	89.2	127.02
cel-miR-41-3p	3.14	9.65	0.65	46.2	28.85	18.52
cel-miR-243-5p	14.32	36.35	8.25	48.36	39.65	38.26
cel-miR-4812-5p	10.54	15.08	12.75	34.42	31.08	40.18
cel-miR-2212-5p	6.17	5.62	5.88	10.59	13.27	14.76
cel-miR-55b	0.84	4.65	0.5	5.44	5.91	6.75
novel_mir7	2.71	0.89	0.42	5.22	4.27	4.68
cel-miR-360-5p	0.24	0.39	0.08	0.86	9.63	0.31
cel-miR-2208b-3p	1.43	0.97	1.03	2.42	4.46	4.91
novel_mir9	2.35	1.67	0.73	3.77	3.41	2.99
cel-miR-2208b-5p	0.48	0.39	0.27	1.08	1.45	1.5
novel_mir69	0.001	0.001	0.001	0.37	0.98	0.88
cel-lin-4-3p	0.04	0.08	0.11	0.71	0.67	0.46
cel-miR-796	0.24	0.19	0.27	0.71	0.55	0.58
cel-miR-4807	0.001	0.001	0.04	0.22	0.2	0.23
novel_mir74	0.001	0.001	0.5	0.001	0.001	0.001
novel_mir63	0.001	0.5	0.38	0.001	0.001	0.001
cel-miR-798	0.76	0.35	0.76	0.07	0.16	0.15
cel-miR-1022-3p	0.91	1.2	0.69	0.41	0.23	0.54
novel_mir82	0.68	1.01	0.99	0.001	0.43	0.42
novel_mir49	0.8	1.43	0.99	0.001	0.001	0.001
cel-miR-4929	2.63	1.4	2.06	0.63	1.17	0.61
novel_mir6	10.46	13.95	8.17	0.001	0.001	0.001
cel-miR-799	32.18	23.95	30.43	1.31	1.6	0.77
novel_mir2	272.35	275.91	233.42	50.49	36.71	37.69

## Sheet: circRNA
Gene	N2-1 Expression	N2-2 Expression	N2-3 Expression	CN30-1 Expression	CN30-2 Expression	CN30-3 Expression
NC_003280.10:12123783|12127979	0	0	0	544	1867	1522
NC_003282.8:8393653|8419500	0	0	0	698	908	655
NC_003281.10:2482736|2483120	117	211	309	391	1062	851
NC_003282.8:677610|678469	100	211	103	544	668	688
NC_003281.10:730591|731804	0	98	0	408	463	671
NC_003279.8:8362774|8363855	0	0	0	289	411	475
NC_003283.11:622417|625899	0	0	0	459	291	213
NC_003283.11:17887282|17888968	0	0	103	510	308	164
NC_003279.8:3598614|3598974	0	260	206	374	600	344
NC_003282.8:2390820|2391249	100	114	274	374	548	311
NC_003280.10:10441877|10444304	0	0	0	255	120	278
NC_003281.10:1927676|1929473	150	130	223	391	360	327
NC_003280.10:13871761|13874236	0	0	0	255	188	115
NC_003283.11:18540396|18543093	117	114	171	323	411	213
NC_003282.8:1943588|1944944	0	0	0	136	206	180
NC_003282.8:2375823|2379002	0	0	69	289	120	164
NC_003284.9:9109917|9110682	100	65	0	221	291	147
NC_003283.11:18571834|18572275	33	0	0	136	171	213
NC_003280.10:14293290|14297717	0	0	0	204	120	147
NC_003281.10:3419498|3419827	0	0	0	102	171	180
NC_003282.8:7715468|7716624	0	65	69	153	154	278
NC_003281.10:1515559|1515904	33	33	34	136	154	246
NC_003281.10:2483768|2484286	67	65	34	170	240	180
NC_003282.8:1663114|1663370	0	81	0	102	171	229
NC_003280.10:13776384|13777687	0	0	103	153	188	180
NC_003282.8:1187800|1189357	33	0	0	102	257	65
NC_003283.11:18065096|18065498	117	98	34	306	120	213
NC_003279.8:5425161|5426197	0	49	69	204	171	131
NC_003279.8:459568|460062	67	49	34	187	137	213
NC_003280.10:1315960|1317204	0	0	0	34	154	196
NC_003279.8:1167651|1167976	0	33	0	119	120	164
NC_003279.8:8362774|8363324	0	0	0	238	86	33
NC_003280.10:457581|457884	33	33	171	221	69	295
NC_003279.8:11394746|11395177	50	81	51	289	120	98
NC_003283.11:18541603|18541811	0	0	0	119	86	98
NC_003282.8:2392021|2393661	0	0	0	170	34	82
NC_003284.9:14976116|14976683	0	0	0	119	69	98
NC_003282.8:5356155|5356686	0	0	0	102	69	98
NC_003283.11:13162314|13167724	84	0	34	85	171	131
NC_003279.8:6074035|6076173	0	0	0	119	34	98
NC_003280.10:3497403|3497723	0	33	0	102	34	147
NC_003284.9:409131|409725	0	0	0	85	51	98
NC_003284.9:14869892|14872082	0	0	0	68	69	82
NC_003279.8:8817607|8820377	0	0	0	51	69	98
NC_003283.11:17686762|17686905	0	0	0	51	51	115
NC_003281.10:1166063|1166409	67	0	69	102	86	147
NC_003279.8:698052|698322	33	0	34	51	69	131
NC_003279.8:1525844|1532397	0	0	0	34	103	33
NC_003282.8:9119097|9120266	0	0	0	51	69	49
NC_003280.10:13536779|13537111	0	0	0	34	69	65
NC_003282.8:3935397|3971468	0	0	0	34	34	98
NC_003279.8:284308|285211	50	98	0	51	34	213
NC_003279.8:12672356|12672788	67	33	0	119	34	82
NC_003283.11:16425593|16511075	0	0	0	34	34	65
NC_003280.10:11211875|11216676	0	0	0	51	34	33
NC_003283.11:14114475|14116680	67	49	51	34	0	49
NC_003279.8:14468410|14468751	33	33	34	0	0	0
NC_003281.10:1057729|1058023	33	49	34	0	0	0
NC_003282.8:12109076|12109343	50	81	51	34	0	0
NC_003282.8:2070543|2070859	33	81	34	0	0	0
NC_003281.10:1940658|1941753	84	49	86	34	34	0
NC_003283.11:20100113|20101257	100	49	34	0	0	0
NC_003284.9:10774892|10775605	100	98	51	0	34	0
NC_003283.11:18693341|18693541	134	146	69	68	0	33
NC_003281.10:5585638|5586390	150	114	69	68	0	0
NC_003280.10:10553495|10555044	33	33	206	0	0	0
NC_003281.10:3103642|3103955	134	195	69	0	51	65
NC_003282.8:1860835|1865469	117	114	274	0	103	98
NC_003282.8:2390820|2393358	100	146	69	0	0	0
NC_003279.8:2173753|2174022	150	179	137	0	86	0
NC_003280.10:1176536|1178402	67	195	120	0	0	0
NC_003283.11:19798002|19799245	84	65	240	0	0	0
NC_003283.11:19798031|19799245	468	114	189	85	51	82
NC_003279.8:13782063|13783519	134	195	377	68	69	0
NC_003283.11:18841198|18841813	167	325	240	0	137	0
NC_003283.11:14131639|14133295	200	211	583	85	154	0
