# Supplementary material for: The whole transcriptome regulation as a function of mitochondrial polymorphisms and aging in Caenorhabditis elegans
Source: Aging (Albany NY). 2020 Feb 4;12(3):2453–70. doi: 10.18632/aging.102754 (PMC7041728; doi:10.18632/aging.102754)
Supplement: Supplementary Table 3 [file aging-12-102754-s008..xlsx]

## Sheet: Sheet1
miRNA id	Target id	RNAhybrid MEF	RNAhybrid Pvalue	miRanda MEF	miRanda score	Symbol	GO term	Pathway	NR id	NR evalue	NR description
cel-miR-124-3p	NM_066984.5	-28.8	0.402764	-26.99	168	sca-1	GO:0005887,GO:0033017,GO:0005635,GO:0031410,GO:0046872,GO:0005388,GO:0005524,GO:0031490,GO:0008340,GO:0006874,GO:0006898,GO:0006915,GO:0018996,GO:0030104,GO:0009792,GO:0042594,GO:0048477,GO:0070588,GO:0040024,GO:0070509,GO:0071688,GO:0030968,GO:0008152,	K05853|1|0.0|2072|cel:CELE_K11D9.2|Ca2+ transporting ATPase, sarcoplasmic/endoplasmic reticulum [EC:3.6.3.8]	gi|71988506|ref|NP_499385.3|	0	Calcium-transporting ATPase [Caenorhabditis elegans]
cel-miR-124-3p	NM_076838.4	-28.6	0.091039	-26.25	169	sng-1	GO:0005829,GO:0016021,GO:0030672,GO:0031594,GO:0017157,GO:0048489,	K17783|1|1.96e-12|70.1|shr:100917660|mitochondrial FAD-linked sulfhydryl oxidase [EC:1.8.3.2]!K04403|2|1.57e-10|65.9|gfr:102037151|TAK1-binding protein 1	gi|17569477|ref|NP_509239.1|	0	Synaptogyrin homolog 1 [Caenorhabditis elegans]
cel-miR-124-3p	NM_060770.3	-32.1	0.023263	-31.79	166	T27F6.8	-	-	gi|17509307|ref|NP_493171.1|	0	Uncharacterized protein CELE_T27F6.8 [Caenorhabditis elegans]
cel-miR-124-3p	NM_170870.6	-27.1	0.672305	-44.24	329	noah-1	GO:0016021,GO:0009792,GO:0010171,GO:0040027,GO:0022404,GO:0018996,GO:0002064,GO:0040011,GO:0042335,	-	gi|392885731|ref|NP_740858.2|	0	NOmpA Homolog (Drosophila nompA: no mechanoreceptor potential A) [Caenorhabditis elegans]
cel-miR-124-3p	NM_001307522.1	-31	0.010146	-28.41	151	Y37E11AL.2	GO:0016021,GO:0004864,GO:0043666,GO:0009966,GO:0043086,	-	gi|25148798|ref|NP_500399.2|	1.31997e-93	Uncharacterized protein CELE_Y37E11AL.2 [Caenorhabditis elegans]
cel-miR-124-3p	NM_070602.2	-26.7	0.112385	-25.92	158	Y116A8C.3	-	-	gi|392902157|ref|NP_503003.2|	2.79164e-108	Uncharacterized protein CELE_Y116A8C.3 [Caenorhabditis elegans]
cel-miR-124-3p	NM_001029240.4	-28.3	0.442019	-27.59	162	nra-3	GO:0008270,	-	gi|71983619|ref|NP_001024411.1|	0	Nicotinic Receptor Associated [Caenorhabditis elegans]
cel-miR-124-3p	NM_078243.3	-28.8	0.260083	-28.42	179	F23A7.5	-	-	gi|71988680|ref|NP_510644.2|	0	Uncharacterized protein CELE_F23A7.5 [Caenorhabditis elegans]
cel-miR-124-3p	NR_070216.1	-25.7	0.037853	-63.2	471	Y39B6A.77	-	-	-	-	-
cel-miR-124-3p	NM_001267365.1	-31.1	0.024072	-28.77	182	F37H8.3	GO:0016787,GO:0008152,	K11729|1|6.07e-30|121|umr:103661186|acyl-CoA dehydrogenase family member 10	gi|392891716|ref|NP_001254294.1|	4.55514e-166	Uncharacterized protein CELE_F37H8.3 [Caenorhabditis elegans]
cel-miR-124-3p	NR_050739.1	-30.3	0.006303	-27.86	156	F49B2.8	-	-	-	-	-
cel-miR-124-3p	NM_001307893.1	-27.7	0.259764	-25.39	161	fkh-3	GO:0005634,GO:0000981,GO:0000977,GO:0006357,	K09396|1|1.53e-12|72.0|mgp:100540083|forkhead box protein C	gi|808359069|ref|NP_001294822.1|	0	ForKHead transcription factor family [Caenorhabditis elegans]
cel-miR-124-3p	NM_001026859.2	-29.8	0.754721	-25.27	157	trr-1	GO:0000123,GO:0000793,GO:0016301,GO:0040027,GO:0040010,GO:0006898,GO:0007283,GO:0040011,GO:0016310,GO:0019915,GO:0009792,GO:0030154,GO:0010171,GO:0040035,GO:0016573,GO:0006281,	K08874|1|0.0|8465|cel:CELE_C47D12.1|transformation/transcription domain-associated protein	gi|71984152|ref|NP_001022030.1|	0	Transcription-associated protein 1 [Caenorhabditis elegans]
cel-miR-124-3p	NM_001263093.1	-27.1	0.673754	-44.24	329	noah-1	GO:0016021,GO:0009792,GO:0010171,GO:0040027,GO:0022404,GO:0018996,GO:0002064,GO:0040011,GO:0042335,	-	gi|392885733|ref|NP_001250022.1|	0	NOmpA Homolog (Drosophila nompA: no mechanoreceptor potential A) [Caenorhabditis elegans]
cel-miR-124-3p	NM_077837.3	-27.7	0.259764	-25.39	161	fkh-4	GO:0005634,GO:0000981,GO:0000977,GO:0006357,	K09396|1|2.24e-12|71.6|mgp:100540083|forkhead box protein C	gi|392927751|ref|NP_510238.2|	0	ForKHead transcription factor family [Caenorhabditis elegans]
cel-miR-124-3p	NM_001306306.1	-29.6	0.369991	-26.73	155	zfh-2	GO:0005634,GO:0003677,GO:0008270,GO:0040035,GO:0002119,GO:0040011,GO:0006898,	K09378|1|0.0|2559|cel:CELE_ZC123.3|AT-binding transcription factor 1	gi|808354673|ref|NP_001293235.1|	0	Zinc Finger and Homeobox [Caenorhabditis elegans]
cel-miR-124-3p	NM_001029241.3	-28.3	0.409325	-27.59	162	nra-3	GO:0008270,	-	gi|71983623|ref|NP_001024412.1|	0	Nicotinic Receptor Associated [Caenorhabditis elegans]
cel-miR-124-3p	NM_076627.3	-27.5	0.607083	-25.15	149	nnt-1	GO:0016021,GO:0005743,GO:0051287,GO:0008750,GO:0050661,GO:0006740,GO:0010467,GO:0015992,	K00323|1|0.0|2118|cel:CELE_C15H9.1|NAD(P) transhydrogenase [EC:1.6.1.2]	gi|17550456|ref|NP_509028.1|	0	Nicotinamide Nucleotide Transhydrogenase [Caenorhabditis elegans]
cel-miR-124-3p	NM_064696.4	-29.1	0.265694	-26.25	154	Y53F4B.12	GO:0005887,GO:0015179,GO:0015297,GO:1902475,GO:0015807,	K13864|1|2.39e-25|117|adf:107350454|solute carrier family 7 (cationic amino acid transporter), member 2!K13871|2|2.53e-25|117|spu:575206|solute carrier family 7 (cationic amino acid transporter), member 14!K13866|3|1.65e-24|114|dgr:Dgri_GH16752|solute carrier family 7 (cationic amino acid transporter), member 4	gi|17537453|ref|NP_497097.1|	0	Uncharacterized protein CELE_Y53F4B.12 [Caenorhabditis elegans]
cel-miR-124-3p	NM_001027109.1	-32.7	0.016855	-28.86	179	srab-14	GO:0016021,GO:0004930,GO:0007186,	-	gi|71993688|ref|NP_001022280.1|	0	Serpentine receptor class alpha/beta-14 [Caenorhabditis elegans]
cel-miR-124-3p	NR_056721.1	-35.1	0.000125	-30.94	175	C29E6.8	-	-	-	-	-
cel-miR-124-3p	NM_171838.4	-27.1	0.673754	-44.24	329	noah-1	GO:0016021,GO:0009792,GO:0010171,GO:0040027,GO:0022404,GO:0018996,GO:0002064,GO:0040011,GO:0042335,	-	gi|392885735|ref|NP_740859.3|	0	NOmpA Homolog (Drosophila nompA: no mechanoreceptor potential A) [Caenorhabditis elegans]
cel-miR-124-3p	NM_001306621.1	-29.1	0.280962	-26.25	154	Y53F4B.12	GO:0005887,GO:0015179,GO:0015297,GO:1902475,GO:0015807,	K13871|1|2.31e-20|101|spu:575206|solute carrier family 7 (cationic amino acid transporter), member 14!K13864|2|6.03e-19|97.1|adf:107350454|solute carrier family 7 (cationic amino acid transporter), member 2!K13866|3|1.51e-18|95.9|dgr:Dgri_GH16752|solute carrier family 7 (cationic amino acid transporter), member 4	gi|808355456|ref|NP_001293550.1|	0	Uncharacterized protein CELE_Y53F4B.12 [Caenorhabditis elegans]
cel-miR-124-3p	NM_071209.5	-26.8	0.354865	-25.42	157	nhr-134	GO:0005634,GO:0008270,GO:0043565,GO:0003700,GO:0043401,GO:0006355,	K08704|1|6.17e-16|84.3|cel:CELE_K08H2.8|hepatocyte nuclear factor 4!K08545|3|7.77e-15|80.5|bfo:BRAFLDRAFT_155937|nuclear receptor subfamily 2 group E member 1!K08546|4|2.24e-14|80.1|adf:107346588|nuclear receptor subfamily 2 group E member 3!K08530|5|3.50e-14|79.3|clv:102097513|peroxisome proliferator-activated receptor gamma	gi|17560940|ref|NP_503610.1|	0	Nuclear hormone receptor family member nhr-134 [Caenorhabditis elegans]
cel-miR-124-3p	NM_063665.6	-29.1	0.168805	-27.54	163	nhr-19	GO:0005634,GO:0008270,GO:0043565,GO:0003707,GO:0003700,GO:0043401,GO:0006355,	K08704|1|5.09e-144|422|bmy:Bm1_17280|hepatocyte nuclear factor 4!K07295|2|1.12e-38|149|cel:CELE_T23H4.2|nuclear receptor subfamily 2 group A	gi|25153085|ref|NP_496066.2|	0	Nuclear hormone receptor family member nhr-19 [Caenorhabditis elegans]
cel-miR-124-3p	NM_075171.4	-36.4	0.038132	-31.2	175	R10E8.6	-	-	gi|453232690|ref|NP_507572.2|	0	Uncharacterized protein CELE_R10E8.6 [Caenorhabditis elegans]
cel-miR-124-3p	NM_001026861.4	-29.8	0.753871	-25.27	157	trr-1	GO:0000123,GO:0000793,GO:0016301,GO:0040027,GO:0040010,GO:0006898,GO:0007283,GO:0040011,GO:0016310,GO:0019915,GO:0009792,GO:0030154,GO:0010171,GO:0040035,GO:0016573,GO:0006281,	K08874|1|0.0|8485|cel:CELE_C47D12.1|transformation/transcription domain-associated protein	gi|71984162|ref|NP_001022032.1|	0	Transcription-associated protein 1 [Caenorhabditis elegans]
cel-miR-124-3p	NM_001026366.1	-30.5	0.06559	-25.42	166	cdk-2	-	-	-	-	-
cel-miR-124-3p	NM_001306304.1	-29.6	0.460361	-26.73	155	zfh-2	GO:0005634,GO:0003677,GO:0008270,GO:0040035,GO:0002119,GO:0040011,GO:0006898,	K09378|1|0.0|3368|cel:CELE_ZC123.3|AT-binding transcription factor 1	gi|808354669|ref|NP_001293233.1|	0	Zinc Finger and Homeobox [Caenorhabditis elegans]
cel-miR-124-3p	NM_076480.2	-36.1	0.004061	-31.58	172	sru-48	GO:0016021,	-	gi|32566550|ref|NP_508881.2|	0	Serpentine Receptor, class U [Caenorhabditis elegans]
cel-miR-124-3p	NM_001306305.1	-29.6	0.374654	-26.73	155	zfh-2	GO:0005634,GO:0003677,GO:0008270,GO:0040035,GO:0002119,GO:0040011,GO:0006898,	K09378|1|0.0|2600|cel:CELE_ZC123.3|AT-binding transcription factor 1	gi|808354671|ref|NP_001293234.1|	0	Zinc Finger and Homeobox [Caenorhabditis elegans]
cel-miR-124-3p	NR_050928.1	-25.2	0.077279	-107.66	776	B0454.20	-	-	-	-	-
cel-miR-124-3p	NM_073868.3	-31.7	0.137262	-27.82	167	eat-6	GO:0005887,GO:0043231,GO:0046872,GO:0005391,GO:0005524,GO:0000003,GO:0030007,GO:0006937,GO:0036376,GO:0040007,GO:0001508,GO:0010248,GO:0015991,GO:0006883,GO:0009792,GO:0002119,GO:0030163,GO:0010107,GO:0010171,GO:0007271,	K01539|1|0.0|2066|cel:CELE_B0365.3|sodium/potassium-transporting ATPase subunit alpha [EC:3.6.3.9]	gi|17559224|ref|NP_506269.1|	0	Sodium/potassium-transporting ATPase subunit alpha [Caenorhabditis elegans]
cel-miR-124-3p	NM_066683.3	-29.5	0.10145	-26.72	172	B0464.9	GO:0051721,GO:0051722,GO:0009792,GO:0002119,GO:0006482,GO:0000003,GO:0008340,	K13617|1|0.0|759|cel:CELE_B0464.9|protein phosphatase methylesterase 1 [EC:3.1.1.89]	gi|17551890|ref|NP_499084.1|	0	Probable protein phosphatase methylesterase 1 [Caenorhabditis elegans]
cel-miR-124-3p	NM_001027108.1	-32.7	0.025084	-28.86	179	srab-14	GO:0016021,GO:0004930,GO:0007186,	-	gi|71993681|ref|NP_001022279.1|	0	Serpentine receptor class alpha/beta-14 [Caenorhabditis elegans]
cel-miR-124-3p	NM_077941.5	-27.1	0.613439	-27.7	166	C33G3.4	GO:0005764,GO:0004567,GO:0005975,	K01192|1|0.0|1883|cel:CELE_C33G3.4|beta-mannosidase [EC:3.2.1.25]	gi|17550784|ref|NP_510342.1|	0	Probable beta-mannosidase [Caenorhabditis elegans]
cel-miR-124-3p	NM_067998.5	-31	0.023357	-28.41	151	Y37E11AL.2	GO:0016021,GO:0004864,GO:0043666,GO:0009966,GO:0043086,	-	gi|25148798|ref|NP_500399.2|	3.49114e-159	Uncharacterized protein CELE_Y37E11AL.2 [Caenorhabditis elegans]
cel-miR-124-3p	NM_001307894.1	-27.7	0.242946	-25.39	161	fkh-3	GO:0005634,GO:0000981,GO:0000977,GO:0006357,	K09396|1|1.20e-12|72.0|mgp:100540083|forkhead box protein C	gi|808359071|ref|NP_001294823.1|	0	ForKHead transcription factor family [Caenorhabditis elegans]
cel-miR-124-3p	NM_001129236.2	-28.8	0.377704	-26.99	168	sca-1	GO:0005887,GO:0033017,GO:0005635,GO:0031410,GO:0046872,GO:0005388,GO:0005524,GO:0031490,GO:0008340,GO:0006874,GO:0006898,GO:0006915,GO:0018996,GO:0030104,GO:0009792,GO:0042594,GO:0048477,GO:0070588,GO:0040024,GO:0070509,GO:0071688,GO:0030968,GO:0008152,	K05853|1|0.0|1841|cbr:CBG18305|Ca2+ transporting ATPase, sarcoplasmic/endoplasmic reticulum [EC:3.6.3.8]	gi|17554158|ref|NP_499386.1|	0	Calcium-transporting ATPase [Caenorhabditis elegans]
cel-miR-124-3p	NM_001026860.4	-29.8	0.75449	-25.27	157	trr-1	GO:0000123,GO:0000793,GO:0016301,GO:0040027,GO:0040010,GO:0006898,GO:0007283,GO:0040011,GO:0016310,GO:0019915,GO:0009792,GO:0030154,GO:0010171,GO:0040035,GO:0016573,GO:0006281,	K08874|1|0.0|8452|cel:CELE_C47D12.1|transformation/transcription domain-associated protein	gi|71984157|ref|NP_001022031.1|	0	Transcription-associated protein 1 [Caenorhabditis elegans]
cel-miR-124-3p	NM_066985.4	-28.8	0.421235	-26.99	168	sca-1	GO:0005887,GO:0033017,GO:0005635,GO:0031410,GO:0046872,GO:0005388,GO:0005524,GO:0031490,GO:0008340,GO:0006874,GO:0006898,GO:0006915,GO:0018996,GO:0030104,GO:0009792,GO:0042594,GO:0048477,GO:0070588,GO:0040024,GO:0070509,GO:0071688,GO:0030968,GO:0008152,	K05853|1|0.0|2090|cbr:CBG18305|Ca2+ transporting ATPase, sarcoplasmic/endoplasmic reticulum [EC:3.6.3.8]	gi|17554158|ref|NP_499386.1|	0	Calcium-transporting ATPase [Caenorhabditis elegans]
cel-miR-124-3p	NR_050662.1	-27.2	0.015105	-61.89	463	F08A8.10	-	-	-	-	-
cel-miR-124-3p	NM_001322671.1	-29.6	0.210229	-26.8	161	acd-2	GO:0016021,GO:0005272,GO:0035725,	K03440|1|0.0|1459|cel:CELE_C24G7.4|acid-sensing ion channel, other	gi|17505689|ref|NP_491293.1|	0	Uncharacterized protein CELE_C24G7.4 [Caenorhabditis elegans]
cel-miR-124-3p	NM_077835.3	-30.4	0.026008	-26.51	173	C29F7.3	GO:0005737,GO:0005634,GO:0004127,GO:0005524,GO:0033862,GO:0006225,GO:0046939,GO:0002119,GO:0006207,GO:0009792,	K13800|1|2.88e-142|398|cel:CELE_C29F7.3|UMP-CMP kinase [EC:2.7.4.- 2.7.4.14]	gi|17550688|ref|NP_510236.1|	2.40089e-141	UMP-CMP kinase 1 [Caenorhabditis elegans]
novel_mir2	NM_062180.2	-36.6	0.024262	-33.42	160	clec-128	-	K06560|1|1.83e-07|59.3|xma:102227252|mannose receptor, C type	gi|808355244|ref|NP_494581.2|	0	C-type LECtin [Caenorhabditis elegans]
novel_mir2	NM_076427.5	-35.4	0.039289	-33.49	159	tsp-14	GO:0005887,GO:0045747,	K17346|1|9.98e-37|140|lgi:LOTGIDRAFT_235927|tetraspanin-33!K17345|3|1.98e-34|137|spu:583480|tetraspanin-5	gi|17567547|ref|NP_508828.1|	0	Tetraspanin [Caenorhabditis elegans]
novel_mir2	NM_001028187.3	-31	0.408382	-25.91	152	T04C4.1	-	K20401|1|0.0|1769|cel:CELE_T04C4.1|folliculin-interacting protein 2	gi|86574955|ref|NP_001023358.2|	0	Uncharacterized protein CELE_T04C4.1 [Caenorhabditis elegans]
novel_mir2	NM_068400.4	-29.3	0.371756	-26.46	151	swsn-6	GO:0031011,GO:0035267,GO:0006281,GO:0040035,GO:0006355,GO:0002119,GO:0009792,GO:0006338,	K11652|1|0.0|907|cel:CELE_ZK616.4|actin-like protein 6B	gi|25149322|ref|NP_500801.2|	0	SWI/SNF nucleosome remodeling complex component [Caenorhabditis elegans]
novel_mir2	NM_063475.3	-30.3	0.199749	-29.15	152	F07H5.10	-	K14845|1|6.21e-06|52.8|cel:CELE_F54C1.2|RAT1-interacting protein	gi|17532951|ref|NP_495876.1|	0	Uncharacterized protein CELE_F07H5.10 [Caenorhabditis elegans]
novel_mir2	NR_132532.1	-29.8	0.634172	-27.5	156	daf-11	-	-	-	-	-
novel_mir2	NM_064863.5	-27.9	0.794594	-26.55	143	trpp-11	-	K20308|1|0.0|1694|cel:CELE_B0412.3|trafficking protein particle complex subunit 11	gi|17551872|ref|NP_497264.1|	0	TRansport Protein Particle [Caenorhabditis elegans]
novel_mir2	NM_171292.3	-28.9	0.461337	-25.39	155	Y69A2AR.1	-	-	gi|71999463|ref|NP_741343.2|	0	Uncharacterized protein CELE_Y69A2AR.1 [Caenorhabditis elegans]
novel_mir2	NM_058263.4	-32.5	0.130121	-29.45	158	sesn-1	GO:0005634,GO:0008340,GO:1901031,	K10141|1|0.0|1001|cel:CELE_Y74C9A.5|sestrin 1/3!K20394|5|1.02e-50|186|cmk:103179452|sestrin 2	gi|115533566|ref|NP_490664.2|	0	Sestrin homolog [Caenorhabditis elegans]
novel_mir2	NM_001277012.1	-32.4	0.273606	-30.42	159	Y43F8B.3	GO:0004867,GO:0010951,	K03909|1|1.06e-24|109|hgl:101710461|tissue factor pathway inhibitor	gi|453232738|ref|NP_001263941.1|	0	Uncharacterized protein CELE_Y43F8B.3 [Caenorhabditis elegans]
novel_mir2	NM_074839.3	-27.9	0.309435	-27.61	158	dkf-2	GO:0005829,GO:0005886,GO:0046872,GO:0005524,GO:0004697,GO:0018105,GO:0035556,GO:0050829,GO:0045089,GO:0050830,	K06070|1|3.84e-23|102|cel:CELE_T25E12.4|protein kinase D [EC:2.7.11.13]	gi|17564676|ref|NP_507240.1|	3.17762e-157	Serine/threonine-protein kinase dkf-2 [Caenorhabditis elegans]
novel_mir2	NM_067556.1	-39.2	0.008722	-35.62	163	col-102	GO:0016021,GO:0005581,GO:0042302,	K06236|1|1.66e-12|75.5|phi:102104738|collagen, type I, alpha	gi|17538706|ref|NP_499957.1|	0	COLlagen [Caenorhabditis elegans]
novel_mir2	NM_001268518.1	-30.6	0.763827	-28.2	148	gon-1	GO:0005604,GO:0005794,GO:0005783,GO:0008270,GO:0004222,GO:0040035,GO:0006508,GO:0006888,GO:0040039,GO:0009792,GO:0015031,	K08624|1|0.0|4467|cel:CELE_F25H8.3|a disintegrin and metalloproteinase with thrombospondin motifs 9 [EC:3.4.24.-]	gi|392900276|ref|NP_001255447.1|	0	A disintegrin and metalloproteinase with thrombospondin motifs gon-1 [Caenorhabditis elegans]
novel_mir2	NM_058512.4	-28.9	0.680796	-31.05	160	tub-2	GO:0005929,GO:0035091,GO:0009055,GO:0005506,GO:0020037,GO:0006952,GO:0061512,GO:0022900,	K19674|1|3.21e-24|115|aag:AaeL_AAEL001513|WD repeat-containing protein 35	gi|25143551|ref|NP_490913.2|	0	TUBby-related [Caenorhabditis elegans]
novel_mir2	NM_001129632.2	-30.9	0.394063	-31.43	148	C12D12.1	GO:0016020,	-	gi|193209507|ref|NP_001123104.1|	0	Uncharacterized protein CELE_C12D12.1 [Caenorhabditis elegans]
novel_mir2	NM_001313079.1	-32.8	0.253968	-31.22	174	arid-1	GO:0017053,GO:0005634,GO:0044212,GO:0006357,	K07874|1|6.59e-06|55.8|dpl:KGM_17418|Ras-related protein Rab-1A	gi|922580872|ref|NP_001300006.1|	0	ARID (AT-rich Interactive Domain-containing protein) homolog [Caenorhabditis elegans]
novel_mir2	NM_001027716.1	-31.9	0.327929	-26.88	153	rsa-2	GO:0005813,GO:0030674,GO:0040035,GO:0009792,GO:0007052,GO:0033365,GO:0040011,	-	gi|71994269|ref|NP_001022887.1|	0	Regulator of Spindle Assembly [Caenorhabditis elegans]
novel_mir2	NM_066209.4	-31	0.150469	-26.86	163	F56C9.6	-	-	gi|17553668|ref|NP_498610.1|	0	Uncharacterized protein CELE_F56C9.6 [Caenorhabditis elegans]
novel_mir2	NM_001267453.1	-34.4	0.106352	-34.61	160	Y48C3A.14	GO:0003917,GO:0003677,GO:0006265,	K03165|1|0.0|1536|cel:CELE_Y48C3A.14|DNA topoisomerase III [EC:5.99.1.2]	gi|392892249|ref|NP_001254381.1|	0	DNA topoisomerase [Caenorhabditis elegans]
novel_mir2	NM_067856.5	-31.3	0.14009	-32.09	166	clec-80	GO:0030246,GO:0045087,	K06560|1|8.30e-07|56.2|tru:101071959|mannose receptor, C type!K17513|2|5.82e-06|50.1|bfo:BRAFLDRAFT_207847|C-type lectin superfamily 17 member A	gi|17543580|ref|NP_500257.1|	0	C-type LECtin [Caenorhabditis elegans]
novel_mir2	NM_001313035.1	-27.5	0.543488	-51.69	308	glct-6	GO:0016021,GO:0015018,GO:0030204,GO:0050650,GO:0005975,GO:0008340,	K10158|1|4.62e-52|181|cel:CELE_ZK1307.5|galactosylgalactosylxylosylprotein 3-beta-glucuronosyltransferase 3 [EC:2.4.1.135]	gi|922580550|ref|NP_001299964.1|	0	GLuCuronosylTransferase-like [Caenorhabditis elegans]
novel_mir2	NM_001307563.1	-29.1	0.505235	-33.21	148	Y77E11A.7	GO:0005515,GO:0009792,GO:0008340,GO:0040035,GO:0002119,GO:0040011,	-	gi|808357932|ref|NP_001294492.1|	0	Uncharacterized protein CELE_Y77E11A.7 [Caenorhabditis elegans]
novel_mir2	NM_001129231.2	-31	0.157309	-26.86	163	F56C9.6	-	-	gi|193209937|ref|NP_001122703.1|	0	Uncharacterized protein CELE_F56C9.6 [Caenorhabditis elegans]
novel_mir2	NM_001026520.2	-33.4	0.191693	-29.99	154	lev-10	GO:0043196,GO:0016021,GO:0045202,GO:0022834,GO:0045161,GO:0030163,GO:0040011,GO:0019915,	K14616|1|4.28e-40|167|spu:591417|cubilin	gi|71992890|ref|NP_001021691.1|	0	Uncharacterized protein CELE_lev-10 [Caenorhabditis elegans]
novel_mir2	NM_068181.3	-29.5	0.142787	-29.44	152	sar-1	GO:0005783,GO:0005794,GO:0005525,GO:0000003,GO:0032940,GO:0018996,GO:0002119,GO:0006898,GO:0006886,GO:0009792,	K07953|1|1.98e-143|401|cel:CELE_ZK180.4|GTP-binding protein SAR1 [EC:3.6.5.-]	gi|17544540|ref|NP_500582.1|	1.64969e-142	GTP-binding protein SAR1 [Caenorhabditis elegans]
novel_mir2	NM_001269202.1	-35	0.129198	-33.68	168	ZK287.4	GO:0004867,GO:0010951,	K03909|1|1.42e-18|90.5|mze:101473619|tissue factor pathway inhibitor!K06238|3|2.46e-18|97.1|tru:101064693|collagen, type VI, alpha	gi|392920021|ref|NP_001256131.1|	0	Uncharacterized protein CELE_ZK287.4 [Caenorhabditis elegans]
novel_mir2	NM_170840.4	-33.1	0.156448	-30.25	154	M01B12.4	-	-	gi|71989035|ref|NP_740825.2|	0	Uncharacterized protein CELE_M01B12.4 [Caenorhabditis elegans]
novel_mir2	NM_060859.1	-31.5	0.138735	-31.43	148	tag-138	GO:0098793,GO:0005543,GO:0030276,GO:0008104,GO:0007269,GO:0032502,GO:0007624,GO:0030421,GO:0006897,	K04559|1|1.11e-137|419|cel:CELE_ZK370.3|huntingtin interacting protein 1	gi|17506539|ref|NP_493260.1|	0	Uncharacterized protein CELE_F08A8.6 [Caenorhabditis elegans]
novel_mir2	NM_001269944.1	-32.4	0.325893	-30.42	159	Y43F8B.3	GO:0004867,GO:0010951,	K03909|1|3.29e-24|108|hgl:101710461|tissue factor pathway inhibitor	gi|392923006|ref|NP_001256873.1|	0	Uncharacterized protein CELE_Y43F8B.3 [Caenorhabditis elegans]
novel_mir2	NM_001307562.1	-29.1	0.525255	-33.21	148	Y77E11A.7	GO:0005515,GO:0009792,GO:0008340,GO:0040035,GO:0002119,GO:0040011,	-	gi|808357930|ref|NP_001294491.1|	0	Uncharacterized protein CELE_Y77E11A.7 [Caenorhabditis elegans]
novel_mir2	NM_001268446.1	-31.2	0.62491	-26.19	164	wnk-1	GO:0005829,GO:0005515,GO:0004674,GO:0005524,GO:0000122,GO:0007275,GO:0018991,GO:0032414,GO:2000021,GO:0006468,GO:0061404,GO:0050891,GO:0035556,	K08867|1|0.0|3410|cel:CELE_C46C2.1|WNK lysine deficient protein kinase [EC:2.7.11.1]	gi|392899981|ref|NP_001255375.1|	0	Serine/threonine-protein kinase WNK [Caenorhabditis elegans]
novel_mir2	NM_001306312.1	-30.6	0.661083	-28.02	165	dys-1	GO:0016014,GO:0005856,GO:0055120,GO:0042383,GO:0005277,GO:0008270,GO:0003779,GO:0045214,GO:0015870,GO:0046716,GO:0043056,GO:0040013,GO:0006836,GO:0007626,GO:0072488,GO:0040017,GO:0032224,	K10366|1|8.32e-180|577|gfr:102033021|dystrophin	gi|808354689|ref|NP_001293243.1|	0	DYStrophin related [Caenorhabditis elegans]
novel_mir2	NM_001026836.3	-33.2	0.224974	-31.17	162	shn-1	GO:0005515,GO:0030421,GO:0007622,	K15009|1|0.0|2038|cel:CELE_C33B4.3|SH3 and multiple ankyrin repeat domains protein	gi|71983519|ref|NP_001022007.1|	0	SHaNk (SH3/ankyrin domain scaffold protein) related [Caenorhabditis elegans]
novel_mir2	NM_061574.1	-27.1	0.451898	-26.83	148	scl-17	-	K20412|1|1.48e-16|80.5|clv:102096997|peptidase inhibitor 16!K19919|5|3.58e-13|71.6|ecb:100033965|cysteine-rich secretory protein	gi|17537371|ref|NP_493975.1|	0	SCP-Like extracellular protein [Caenorhabditis elegans]
novel_mir2	NM_076213.1	-28.6	0.096906	-27	155	T27A10.5	-	-	gi|17570107|ref|NP_508614.1|	6.13055e-75	Uncharacterized protein CELE_T27A10.5 [Caenorhabditis elegans]
novel_mir2	NM_001276646.1	-36.5	0.02764	-40	165	atg-4.1	GO:0005829,GO:0004197,GO:0005515,GO:0051697,GO:0000045,GO:0006501,GO:0040007,GO:0044804,GO:0006612,GO:0016485,GO:0000422,	K08342|1|0.0|1003|cel:CELE_Y87G2A.3|cysteine protease ATG4 [EC:3.4.22.-]	gi|453230621|ref|NP_001263575.1|	0	AuTophaGy (yeast Atg homolog) [Caenorhabditis elegans]
novel_mir2	NM_001268287.1	-30.7	0.64501	-26.87	166	frm-5.1	GO:0002119,GO:0040022,GO:0042127,GO:0040020,GO:0045132,GO:0008406,	K02374|1|6.03e-141|463|tsp:Tsp_03584|tyrosine-protein phosphatase non-receptor type 13	gi|392898079|ref|NP_001255216.1|	0	FERM domain (protein4.1-ezrin-radixin-moesin) family [Caenorhabditis elegans]
novel_mir2	NM_001268195.1	-30.3	0.442936	-57.94	309	T28D6.5	GO:0016021,GO:0009792,GO:0040007,GO:0040035,GO:0002119,	-	gi|392896721|ref|NP_001255125.1|	0	Uncharacterized protein CELE_T28D6.5 [Caenorhabditis elegans]
novel_mir2	NM_001029445.1	-33.6	0.057462	-31.86	163	arg-1	GO:0016021,GO:0009880,GO:0040020,GO:0030154,GO:0042127,GO:0007154,	K06051|1|4.50e-15|81.3|loa:LOAG_01014|delta!K06052|2|2.30e-13|76.6|dpx:DAPPUDRAFT_49862|jagged!K02599|3|1.72e-12|73.9|sko:100368704|Notch 1	gi|71989029|ref|NP_001024616.1|	0	Delta-like protein [Caenorhabditis elegans]
novel_mir2	NM_001313077.1	-32.8	0.388546	-31.22	174	arid-1	GO:0017053,GO:0005634,GO:0044212,GO:0006357,	K19194|1|2.99e-15|87.4|sasa:106602179|AT-rich interactive domain-containing protein 4A!K19195|4|3.38e-14|80.1|sasa:106578771|AT-rich interactive domain-containing protein 4B	gi|392918113|ref|NP_001041181.2|	0	ARID (AT-rich Interactive Domain-containing protein) homolog [Caenorhabditis elegans]
novel_mir2	NM_072866.3	-32.5	0.707852	-28.23	170	rpm-1	GO:0036062,GO:0031594,GO:0030424,GO:0005634,GO:0016874,GO:0008270,GO:0019903,GO:0061630,GO:0031435,GO:0043409,GO:0051965,GO:1902230,GO:0016567,GO:0018991,GO:0046959,GO:0048692,GO:0010171,GO:0040011,GO:0031647,GO:0006355,	K10693|1|0.0|7881|cel:CELE_C01B7.6|E3 ubiquitin-protein ligase MYCBP2 [EC:2.3.2.27]	gi|17563242|ref|NP_505267.1|	0	E3 ubiquitin-protein ligase rpm-1 [Caenorhabditis elegans]
novel_mir2	NM_001307107.1	-31.2	0.636648	-26.19	164	wnk-1	GO:0005829,GO:0005515,GO:0004674,GO:0005524,GO:0000122,GO:0007275,GO:0018991,GO:0032414,GO:2000021,GO:0006468,GO:0061404,GO:0050891,GO:0035556,	K08867|1|0.0|3757|cel:CELE_C46C2.1|WNK lysine deficient protein kinase [EC:2.7.11.1]	gi|808357016|ref|NP_001294036.1|	0	Serine/threonine-protein kinase WNK [Caenorhabditis elegans]
novel_mir2	NM_077419.6	-33.7	0.125557	-29.06	164	haly-1	GO:0005737,GO:0004397,GO:0019557,GO:0055069,GO:1990359,GO:0019556,	K01745|1|0.0|1389|cel:CELE_F47B10.2|histidine ammonia-lyase [EC:4.3.1.3]	gi|17567831|ref|NP_509820.1|	0	Histidine ammonia-lyase [Caenorhabditis elegans]
novel_mir2	NM_064446.1	-34.4	0.066306	-30.21	177	ddl-2	GO:0071203,GO:0005769,GO:0043014,GO:0008340,GO:0042994,GO:0034314,GO:2000677,	K18461|1|0.0|991|cel:CELE_Y48E1B.1|WAS protein family homolog 1	gi|17537245|ref|NP_496847.1|	0	Daf-16-Dependent Longevity (WT but not daf-16 lifespan increased) [Caenorhabditis elegans]
novel_mir2	NM_001306937.1	-34.1	0.055754	-29.58	170	ssu-2	-	-	gi|808356676|ref|NP_001293866.1|	0	Suppressor of Stomatin mutant Uncoordination [Caenorhabditis elegans]
novel_mir2	NM_001269943.1	-32.4	0.379103	-30.42	159	Y43F8B.3	GO:0004867,GO:0010951,	K03909|1|3.37e-24|108|hgl:101710461|tissue factor pathway inhibitor	gi|392923004|ref|NP_001256872.1|	0	Uncharacterized protein CELE_Y43F8B.3 [Caenorhabditis elegans]
novel_mir2	NM_058488.5	-28.2	0.398919	-26.23	154	Y71G12B.10	GO:0003824,GO:0008152,	K01640|1|0.0|652|cel:CELE_Y71G12B.10|hydroxymethylglutaryl-CoA lyase [EC:4.1.3.4]	gi|17510563|ref|NP_490889.1|	0	Uncharacterized protein CELE_Y71G12B.10 [Caenorhabditis elegans]
novel_mir2	NM_071839.4	-34.8	0.060838	-32.15	173	Y61A9LA.3	-	-	gi|72001392|ref|NP_504240.2|	0	Uncharacterized protein CELE_Y61A9LA.3 [Caenorhabditis elegans]
novel_mir2	NM_064621.3	-31.4	0.097236	-30.56	157	clec-147	GO:0030246,	-	gi|17531499|ref|NP_497022.1|	0	C-type LECtin [Caenorhabditis elegans]
novel_mir2	NM_059760.5	-32.1	0.355771	-27.6	167	drh-3	GO:0016020,GO:0097159,GO:0016817,GO:1901363,	K12646|1|0.0|2336|cel:CELE_D2005.5|ATP-dependent RNA helicase DDX58 [EC:3.6.3.14]!K12647|5|1.46e-55|215|acs:100553529|interferon-induced helicase C domain-containing protein 1 [EC:3.6.4.13]	gi|71982860|ref|NP_492161.3|	0	Dicer Related Helicase [Caenorhabditis elegans]
novel_mir2	NM_001026202.1	-28.3	0.201879	-26.71	146	C06B8.11	-	-	gi|71983022|ref|NP_001021373.1|	3.58656e-125	Uncharacterized protein CELE_C06B8.11 [Caenorhabditis elegans]
novel_mir2	NM_078193.5	-28	0.629588	-28.84	154	Y7A5A.1	GO:0016021,GO:0050660,GO:0016614,GO:0000246,GO:0008202,GO:0055114,	K09828|1|0.0|715|dpx:DAPPUDRAFT_213873|Delta24-sterol reductase [EC:1.3.1.72 1.3.1.-]	gi|17570305|ref|NP_510594.1|	0	Uncharacterized protein CELE_Y7A5A.1 [Caenorhabditis elegans]
novel_mir2	NM_065241.2	-31.2	0.472876	-25.7	158	R10F2.6	GO:0004725,GO:0035335,	K18026|1|3.08e-06|56.2|dre:393438|tyrosine-protein phosphatase non-receptor type 2 [EC:3.1.3.48]	gi|392894357|ref|NP_497642.2|	0	Uncharacterized protein CELE_R10F2.6 [Caenorhabditis elegans]
novel_mir2	NM_001028344.3	-34.9	0.066409	-33.99	156	lem-4	GO:0016021,GO:0031965,GO:0005783,GO:0051721,GO:0051301,GO:0042326,GO:0035307,GO:0009792,GO:0007084,	K14829|1|2.34e-33|141|dpl:KGM_15711|pre-rRNA-processing protein IPI3	gi|71999267|ref|NP_001023514.1|	0	Ankyrin repeat and LEM domain-containing protein 2 homolog [Caenorhabditis elegans]
novel_mir2	NM_001028278.2	-35.2	0.061619	-32.36	163	cutl-24	GO:0016021,	-	gi|71996535|ref|NP_001023449.1|	0	CUTiclin-Like [Caenorhabditis elegans]
novel_mir2	NM_072986.5	-29.8	0.525043	-32.31	153	tag-232	GO:0005622,	-	gi|17564372|ref|NP_505387.1|	0	Uncharacterized protein CELE_T18H9.7 [Caenorhabditis elegans]
novel_mir2	NM_062879.4	-32.3	0.099723	-32.28	169	C32D5.12	GO:0003854,GO:0009792,GO:0010171,GO:0002119,GO:0006694,GO:0040011,GO:0055114,	K00070|1|7.98e-19|91.7|tsp:Tsp_09898|3beta-hydroxy-Delta5-steroid dehydrogenase / steroid Delta-isomerase [EC:1.1.1.145 5.3.3.1]!K12408|4|2.21e-15|81.6|tru:101071654|cholest-5-ene-3beta,7alpha-diol 3beta-dehydrogenase [EC:1.1.1.181]	gi|17532251|ref|NP_495280.1|	0	Uncharacterized protein CELE_C32D5.12 [Caenorhabditis elegans]
novel_mir2	NM_001267413.1	-30.9	0.252176	-27.71	160	sop-2	GO:0016607,GO:0031625,GO:0003723,GO:0042803,GO:0007411,GO:0016055,GO:0018991,GO:0040015,GO:0030334,GO:0042659,GO:0006915,GO:0040034,GO:0045892,GO:0002119,GO:0009952,GO:0048665,GO:0010607,GO:0040029,	-	gi|392892040|ref|NP_001254340.1|	0	Suppressor of Pal-1 [Caenorhabditis elegans]
novel_mir2	NM_001267480.1	-35	0.050065	-30.52	166	Y51H1A.2	-	K19330|1|6.27e-38|152|sko:100377422|run domain Beclin-1 interacting and cysteine-rich containing protein	gi|392892361|ref|NP_001254409.1|	0	Uncharacterized protein CELE_Y51H1A.2 [Caenorhabditis elegans]
novel_mir2	NM_001306422.1	-28.5	0.632325	-26.25	150	npp-13	GO:0005643,GO:0017056,GO:0005515,GO:0051292,GO:0006606,GO:0009792,GO:0000132,GO:0016973,	K14309|1|0.0|1364|cel:CELE_Y37E3.15|nuclear pore complex protein Nup93	gi|808354905|ref|NP_001293351.1|	0	Nuclear Pore complex Protein [Caenorhabditis elegans]
novel_mir2	NM_001027671.3	-28.9	0.52934	-29.29	157	ckr-2	GO:0016021,GO:0042923,GO:0004983,GO:0008340,GO:0007218,	K04196|1|0.0|1041|cel:CELE_Y39A3B.5|cholecystokinin-like receptor	gi|71993354|ref|NP_001022842.1|	0	CholecystoKinin Receptor homolog [Caenorhabditis elegans]
novel_mir2	NR_102087.1	-33.8	0.066684	-33.17	160	lurp-4	-	-	-	-	-
novel_mir2	NM_065480.2	-28.1	0.466354	-25.22	155	ckb-3	GO:0004103,GO:0005524,GO:0016310,GO:0008654,GO:0019915,GO:0006657,	K14156|1|0.0|764|cel:CELE_B0285.10|choline/ethanolamine kinase [EC:2.7.1.32 2.7.1.82]	gi|133904679|ref|NP_497881.2|	0	Putative choline kinase B3 [Caenorhabditis elegans]
novel_mir2	NM_171689.4	-30.4	0.746918	-50.8	325	lgx-1	GO:0005576,GO:0004568,GO:0008061,GO:0016810,GO:0005975,GO:0006032,	K20879|1|1.71e-06|58.9|cbr:CBG05211|NIMA (never in mitosis gene a)-related kinase 10 [EC:2.7.11.1]	gi|392926072|ref|NP_741795.2|	0	Lin-12 and Glp-1 X-hybridizing [Caenorhabditis elegans]
novel_mir2	NM_070570.3	-33	0.375726	-56.48	305	set-26	-	K09189|1|2.49e-30|137|loa:LOAG_02935|histone-lysine N-methyltransferase MLL5 [EC:2.1.1.43]	gi|392902115|ref|NP_502971.3|	0	SET (trithorax/polycomb) domain containing [Caenorhabditis elegans]
novel_mir2	NM_066634.3	-35	0.185091	-25.25	158	ZC84.6	GO:0004867,GO:0010951,	K03909|1|2.22e-23|107|pps:100974935|tissue factor pathway inhibitor	gi|392896012|ref|NP_499035.2|	0	Uncharacterized protein CELE_ZC84.6 [Caenorhabditis elegans]
novel_mir2	NM_001313336.1	-25.1	0.51379	-33.32	160	Y50D4B.1	-	-	gi|17565160|ref|NP_503381.1|	7.47149e-96	Uncharacterized protein CELE_Y50D4B.1 [Caenorhabditis elegans]
novel_mir2	NM_075680.4	-28.6	0.592341	-56.48	305	Y73B3A.1	-	-	gi|808358935|ref|NP_508081.2|	0	Uncharacterized protein CELE_Y73B3A.1 [Caenorhabditis elegans]
novel_mir2	NM_001136306.1	-29.6	0.061568	-40.73	280	hrp-2	GO:0005634,GO:0003676,GO:0000166,GO:0040035,GO:0009792,GO:0006915,GO:0048477,	-	gi|71987750|ref|NP_493049.2|	1.94095e-60	human HnRNP A1 homolog [Caenorhabditis elegans]
novel_mir2	NM_001313346.1	-32.7	0.076042	-30.88	165	unc-34	GO:0030054,GO:0032433,GO:0031252,GO:0005737,GO:0005102,GO:0016477,GO:0048675,GO:0031103,GO:0008045,GO:0033563,GO:0040017,GO:0035262,	-	gi|922581408|ref|NP_001300274.1|	0	Uncharacterized protein CELE_Y50D4C.1 [Caenorhabditis elegans]
novel_mir2	NM_067015.4	-32.3	0.048413	-27.26	152	exos-1	GO:0005737,GO:0000176,GO:0004527,GO:0009792,GO:0090305,GO:0040018,GO:0000003,	K07573|1|1.47e-152|425|cel:CELE_Y48A6B.5|exosome complex component CSL4	gi|17555992|ref|NP_499416.1|	1.21998e-151	EXOSome (multiexonuclease complex) component [Caenorhabditis elegans]
novel_mir2	NM_075454.5	-26.8	0.465142	-25.62	152	Y60A3A.19	GO:0016021,	K20363|1|5.75e-07|53.9|nve:NEMVE_v1g206185|protein transport protein YIP1	gi|72001370|ref|NP_507855.2|	4.50911e-166	Protein YIPF [Caenorhabditis elegans]
novel_mir2	NM_001028328.2	-34.6	0.079461	-29.77	170	Y54G2A.26	-	-	gi|71998018|ref|NP_001023499.1|	0	Uncharacterized protein CELE_Y54G2A.26 [Caenorhabditis elegans]
novel_mir2	NM_171572.3	-26.1	0.768828	-26.12	151	tgt-2	GO:0005737,GO:0008479,GO:0008270,GO:0006400,GO:0008616,	K15407|1|0.0|775|cel:CELE_Y39B6A.35|queuine tRNA-ribosyltransferase subunit QTRTD1 [EC:2.4.2.29]!K00773|4|1.45e-82|261|bmy:Bm1_51530|queuine tRNA-ribosyltransferase [EC:2.4.2.29]	gi|25146502|ref|NP_741662.1|	0	Queuine tRNA-ribosyltransferase subunit tgt-2 [Caenorhabditis elegans]
novel_mir2	NR_002446.1	-30.7	0.314601	-26.15	155	zipt-2.1	-	-	-	-	-
novel_mir2	NM_074673.1	-27.5	0.544606	-45	304	str-108	GO:0005887,GO:0038022,GO:0050911,GO:0007186,GO:0019915,GO:0042048,	K08473|1|0.0|733|cel:CELE_F10A3.13|nematode chemoreceptor	gi|17559482|ref|NP_507074.1|	0	Seven TM Receptor [Caenorhabditis elegans]
novel_mir2	NM_001313076.1	-32.8	0.389122	-31.22	174	arid-1	GO:0017053,GO:0005634,GO:0044212,GO:0006357,	K19194|1|3.13e-15|87.4|sasa:106602179|AT-rich interactive domain-containing protein 4A!K19195|4|3.29e-14|80.1|sasa:106578771|AT-rich interactive domain-containing protein 4B	gi|922580868|ref|NP_001300004.1|	0	ARID (AT-rich Interactive Domain-containing protein) homolog [Caenorhabditis elegans]
novel_mir2	NM_001306918.1	-33.9	0.196655	-31.06	156	kcc-1	GO:0016021,GO:0015379,GO:0022820,GO:1902476,GO:0007268,GO:0071805,GO:0040011,GO:0009792,	K14427|1|0.0|2284|cel:CELE_R13A1.2|solute carrier family 12 (potassium/chloride transporter), member 4/5/6	gi|808356636|ref|NP_001293846.1|	0	K+/Cl-Cotransporter [Caenorhabditis elegans]
novel_mir2	NR_138527.1	-28.9	0.524723	-25.39	155	Y69A2AR.1	-	-	-	-	-
novel_mir2	NM_001268405.1	-26.3	0.628252	-51.02	305	grsp-2	-	-	gi|392899804|ref|NP_001255334.1|	1.94504e-141	Glycine Rich Secreted Protein [Caenorhabditis elegans]
novel_mir2	NM_077715.4	-30.9	0.593678	-29.14	153	adt-1	GO:0004222,GO:0008270,GO:0006508,	K08621|1|2.61e-64|244|cmy:102942601|a disintegrin and metalloproteinase with thrombospondin motifs 6 [EC:3.4.24.-]!K13912|3|4.12e-62|241|bfo:BRAFLDRAFT_85664|deleted in malignant brain tumors 1 protein	gi|32566077|ref|NP_510116.2|	0	ADAMTS family [Caenorhabditis elegans]
novel_mir2	NM_065541.5	-29.1	0.796322	-27.77	166	F10F2.2	-	K01952|1|0.0|2744|cel:CELE_F10F2.2|phosphoribosylformylglycinamidine synthase [EC:6.3.5.3]	gi|392894769|ref|NP_497942.2|	0	Probable phosphoribosylformylglycinamidine synthase [Caenorhabditis elegans]
novel_mir2	NM_001313081.1	-32.8	0.096441	-31.22	174	arid-1	GO:0017053,GO:0005634,GO:0044212,GO:0006357,	-	gi|922580872|ref|NP_001300006.1|	0	ARID (AT-rich Interactive Domain-containing protein) homolog [Caenorhabditis elegans]
novel_mir2	NM_001306618.1	-27.4	0.299345	-28.99	145	gpx-2	GO:0005737,GO:0004602,GO:0098869,GO:0055114,GO:0006979,	K00432|1|7.84e-132|370|cel:CELE_R05H10.5|glutathione peroxidase [EC:1.11.1.9]	gi|808355450|ref|NP_001293547.1|	6.5265e-131	Glutathione peroxidase [Caenorhabditis elegans]
novel_mir2	NM_001029655.5	-32.4	0.281894	-30.29	157	abts-4	GO:0016323,GO:0005887,GO:0005452,GO:1902476,GO:0051453,	K13856|1|8.88e-103|346|lcm:102356100|solute carrier family 4 (anion exchanger), member 3!K13855|3|1.69e-100|346|cmk:103190096|solute carrier family 4 (anion exchanger), member 2	gi|86565064|ref|NP_001024826.2|	0	Anion/Bicarbonate TranSporter family [Caenorhabditis elegans]
novel_mir2	NM_001307411.1	-28.8	0.050146	-25.91	155	R05C11.4	GO:0016021,	-	gi|808357628|ref|NP_001294340.1|	9.61402e-48	Uncharacterized protein CELE_R05C11.4 [Caenorhabditis elegans]
novel_mir2	NM_074854.2	-26.9	0.63023	-29.95	157	clec-37	-	K06560|1|2.39e-11|70.5|umr:103664212|mannose receptor, C type	gi|72000946|ref|NP_507255.2|	0	C-type LECtin [Caenorhabditis elegans]
novel_mir2	NM_001347275.1	-28.9	0.367939	-73.97	453	grl-23	-	-	gi|392921183|ref|NP_001256431.1|	0	GRound-Like (grd related) [Caenorhabditis elegans]
novel_mir2	NM_001307905.1	-31.7	0.115238	-29.45	157	F11D5.1	-	-	gi|808359093|ref|NP_001294834.1|	0	Uncharacterized protein CELE_F11D5.1 [Caenorhabditis elegans]
novel_mir2	NM_063433.3	-30.5	0.17786	-29.54	164	T22C8.6	-	-	gi|193204981|ref|NP_495834.2|	0	Uncharacterized protein CELE_T22C8.6 [Caenorhabditis elegans]
novel_mir2	NM_071847.6	-28	0.54775	-25.42	160	pmt-2	GO:0005737,GO:0080101,GO:0000773,GO:0006656,GO:0032259,	K05929|1|3.18e-61|211|xtr:100124841|phosphoethanolamine N-methyltransferase [EC:2.1.1.103]	gi|17561380|ref|NP_504248.1|	0	Phosphoethanolamine MethylTransferase [Caenorhabditis elegans]
novel_mir2	NM_060657.3	-29	0.334297	-26.42	153	M01G12.14	-	K14845|1|7.92e-08|58.5|bmy:Bm1_36000|RAT1-interacting protein	gi|17508369|ref|NP_493058.1|	0	Uncharacterized protein CELE_M01G12.14 [Caenorhabditis elegans]
novel_mir2	NM_001268403.1	-26.3	0.661858	-51.02	305	grsp-2	-	-	gi|392899800|ref|NP_001255332.1|	1.60917e-156	Glycine Rich Secreted Protein [Caenorhabditis elegans]
novel_mir2	NM_001025783.2	-29.9	0.552317	-48.09	310	vps-34	GO:0005942,GO:0001891,GO:0005640,GO:0005737,GO:0005730,GO:0042995,GO:0016303,GO:0005524,GO:0061365,GO:0050708,GO:0008340,GO:0036092,GO:0000003,GO:0040007,GO:0042395,GO:0040011,GO:0006998,GO:0048015,GO:0002119,GO:0006914,GO:0090386,GO:1901076,GO:0046854,	K00914|1|0.0|1862|cel:CELE_B0025.1|phosphatidylinositol 3-kinase [EC:2.7.1.137]	gi|71980403|ref|NP_001020954.1|	0	Phosphatidylinositol 3-kinase [Caenorhabditis elegans]
novel_mir2	NM_078119.5	-35.3	0.086777	-35.24	170	ocr-3	GO:0016021,GO:0005216,GO:0034220,	K04974|1|0.0|1701|cel:CELE_T10B10.7|transient receptor potential cation channel subfamily V member 5	gi|193210941|ref|NP_510520.4|	0	Osm-9 and Capsaicin receptor-Related [Caenorhabditis elegans]
novel_mir2	NM_001276602.1	-28.7	0.335718	-31.04	161	R05D7.3	-	-	gi|453229800|ref|NP_001263531.1|	0	Uncharacterized protein CELE_R05D7.3 [Caenorhabditis elegans]
novel_mir2	NM_058694.3	-28	0.712958	-26.11	155	mod-5	GO:0043005,GO:0098793,GO:0005887,GO:0005328,GO:0015222,GO:0055085,GO:0007268,GO:0019915,GO:0051610,	K05037|1|0.0|1373|cel:CELE_Y54E10BR.7|solute carrier family 6 (neurotransmitter transporter, serotonin) member 4	gi|71995588|ref|NP_491095.3|	0	Transporter [Caenorhabditis elegans]
novel_mir2	NM_001307071.1	-29.9	0.549832	-27.83	165	tag-273	GO:0008270,GO:0000003,	-	gi|808356944|ref|NP_001294000.1|	0	Uncharacterized protein CELE_Y57G11A.1 [Caenorhabditis elegans]
novel_mir2	NM_063924.5	-26.4	0.730558	-25.89	146	npp-19	GO:0044613,GO:0044615,GO:0005487,GO:0005543,GO:0000166,GO:0003697,GO:0006999,GO:0006607,GO:0000003,GO:0006355,GO:0009792,GO:0051028,	K14313|1|0.0|773|cel:CELE_R06F6.5|nuclear pore complex protein Nup53	gi|17535511|ref|NP_496325.1|	0	Nucleoporin NUP53 [Caenorhabditis elegans]
novel_mir2	NM_061814.2	-32.2	0.210025	-28.12	158	cbs-2	-	K01697|1|0.0|1349|cel:CELE_F54A3.4|cystathionine beta-synthase [EC:4.2.1.22]	gi|453231747|ref|NP_494215.2|	0	Cystathionine Beta-Synthase [Caenorhabditis elegans]
novel_mir2	NM_074850.2	-34.6	0.033561	-32.09	155	phy-3	GO:0016705,GO:0031418,GO:0005506,GO:0055114,	K00472|1|2.66e-27|116|dmo:Dmoj_GI10638|prolyl 4-hydroxylase [EC:1.14.11.2]	gi|72000637|ref|NP_507251.2|	0	Proline HYdroxylase [Caenorhabditis elegans]
novel_mir2	NM_072026.3	-30.5	0.247521	-29.16	156	nhr-216	GO:0005634,GO:0008270,GO:0043565,GO:0003700,GO:0043401,GO:0006355,	K08706|1|8.38e-18|90.5|cel:CELE_T18D3.2|nuclear receptor subfamily 0 group A!K08701|2|7.45e-17|87.4|obi:106876050|nuclear receptor subfamily 1 group D member 3!K19773|3|1.16e-16|87.0|cbr:CBG15730|nuclear hormone receptor family member NHR-80!K08525|5|2.15e-16|85.9|sbq:101040304|retinoid X receptor beta	gi|392919025|ref|NP_504427.3|	0	Nuclear Hormone Receptor family [Caenorhabditis elegans]
novel_mir2	NM_171110.3	-26.9	0.789024	-46.05	297	C45G9.6	-	-	gi|25148501|ref|NP_741124.1|	0	Uncharacterized protein CELE_C45G9.6 [Caenorhabditis elegans]
novel_mir2	NM_001028244.3	-32.7	0.109408	-29.61	150	hlh-30	GO:0005737,GO:0005634,GO:0000981,GO:0046983,GO:0010506,GO:0050829,GO:0008340,GO:0045944,GO:0000003,GO:0019915,GO:0050830,	K09105|1|1.21e-28|122|ola:101166296|transcription factor E3!K09455|4|6.68e-28|119|asn:102383188|microphthalmia-associated transcription factor	gi|71994975|ref|NP_001023415.1|	0	Helix Loop Helix [Caenorhabditis elegans]
novel_mir2	NM_001129193.1	-33.1	0.330513	-29.81	158	pqn-87	-	K14454|1|1.11e-41|173|tsp:Tsp_11254|aspartate aminotransferase, cytoplasmic [EC:2.6.1.1]!K11838|2|2.17e-33|146|bmor:101739310|ubiquitin carboxyl-terminal hydrolase 7 [EC:3.4.19.12]	gi|193205237|ref|NP_001122665.1|	0	Prion-like-(Q/N-rich)-domain-bearing protein [Caenorhabditis elegans]
novel_mir2	NM_001025818.1	-38.5	0.270083	-31.72	167	unc-89	GO:0031430,GO:0004672,GO:0019902,GO:0017048,GO:0005089,GO:0005524,GO:0035023,GO:0040011,GO:0006468,GO:0010171,GO:0030241,GO:0043547,	K12567|1|0.0|1436|adf:107339449|titin [EC:2.7.11.1]	gi|71980602|ref|NP_001020989.1|	0	Muscle M-line assembly protein unc-89 [Caenorhabditis elegans]
novel_mir2	NM_001307104.1	-31.2	0.605057	-26.19	164	wnk-1	GO:0005829,GO:0005515,GO:0004674,GO:0005524,GO:0000122,GO:0007275,GO:0018991,GO:0032414,GO:2000021,GO:0006468,GO:0061404,GO:0050891,GO:0035556,	K08867|1|0.0|3035|cel:CELE_C46C2.1|WNK lysine deficient protein kinase [EC:2.7.11.1]	gi|808357010|ref|NP_001294033.1|	0	Serine/threonine-protein kinase WNK [Caenorhabditis elegans]
novel_mir2	NM_001268926.1	-29.7	0.483785	-52.77	302	Y41E3.11	GO:0009792,GO:0002119,GO:0042127,GO:0007281,GO:0040020,GO:0040011,GO:0019915,	K15047|1|3.85e-56|204|lgi:LOTGIDRAFT_138642|heterogeneous nuclear ribonucleoprotein U-like protein 1	gi|392901954|ref|NP_001255853.1|	0	Uncharacterized protein CELE_Y41E3.11 [Caenorhabditis elegans]
novel_mir2	NM_001029067.2	-27.8	0.27949	-53.6	312	grsp-1	-	-	gi|72001162|ref|NP_001024238.1|	5.0249e-93	Glycine Rich Secreted Protein [Caenorhabditis elegans]
novel_mir2	NM_001322640.1	-27.9	0.075479	-26.55	143	trpp-11	-	K20308|1|3.53e-42|149|cel:CELE_B0412.3|trafficking protein particle complex subunit 11	gi|17551872|ref|NP_497264.1|	2.85347e-41	TRansport Protein Particle [Caenorhabditis elegans]
novel_mir2	NM_001129575.2	-32.4	0.39993	-30.42	159	Y43F8B.3	GO:0004867,GO:0010951,	K03909|1|1.67e-25|113|asn:102388104|tissue factor pathway inhibitor	gi|392923010|ref|NP_001123047.2|	0	Uncharacterized protein CELE_Y43F8B.3 [Caenorhabditis elegans]
novel_mir2	NM_171898.4	-29.1	0.515988	-33.21	148	Y77E11A.7	GO:0005515,GO:0009792,GO:0008340,GO:0040035,GO:0002119,GO:0040011,	-	gi|71999617|ref|NP_741317.2|	0	Uncharacterized protein CELE_Y77E11A.7 [Caenorhabditis elegans]
novel_mir2	NM_001031625.4	-30.7	0.188766	-26.15	155	zipt-2.1	GO:0005886,GO:0016021,GO:0005385,GO:0071577,	K14709|1|0.0|739|cel:CELE_C06G8.3|solute carrier family 39 (zinc transporter), member 1/2/3	gi|72184932|ref|NP_001026796.1|	0	Uncharacterized protein CELE_C06G8.3 [Caenorhabditis elegans]
novel_mir2	NM_066449.2	-28.3	0.354163	-26.26	159	ZK353.4	-	-	gi|392895796|ref|NP_498850.2|	0	Uncharacterized protein CELE_ZK353.4 [Caenorhabditis elegans]
novel_mir2	NM_076881.6	-28.4	0.672772	-26.75	171	vps-52	-	K20298|1|0.0|1459|cel:CELE_F08C6.3|vacuolar protein sorting-associated protein 52	gi|453232817|ref|NP_509282.4|	0	Vacuolar protein sorting-associated protein 52 homolog [Caenorhabditis elegans]
novel_mir2	NM_001027799.1	-28.5	0.504825	-28.94	167	uaf-1	GO:0071004,GO:0016607,GO:0089701,GO:0000243,GO:0005515,GO:0000166,GO:0030628,GO:0008187,GO:0008340,GO:0042127,GO:0048589,GO:0000381,GO:0040020,GO:0000389,GO:0009792,GO:0002119,GO:0007281,GO:0040022,GO:0010172,GO:0040035,	K12837|1|0.0|881|cel:CELE_Y92C3B.2|splicing factor U2AF 65 kDa subunit	gi|71996490|ref|NP_001022970.1|	0	U2AF splicing factor [Caenorhabditis elegans]
novel_mir2	NM_001269654.1	-28.8	0.384729	-28.2	155	gnrr-2	GO:0005887,GO:0008528,GO:0009792,GO:0007200,GO:0007218,	K04280|1|1.23e-34|136|bmor:100174939|gonadotropin-releasing hormone receptor	gi|392921832|ref|NP_001256583.1|	0	human GoNadotropin-Releasing hormone Receptor (GnRHR) related [Caenorhabditis elegans]
novel_mir2	NM_001129438.2	-30.2	0.019875	-26.5	151	F11D11.12	-	-	gi|193207694|ref|NP_001122910.1|	3.85249e-41	Uncharacterized protein CELE_F11D11.12 [Caenorhabditis elegans]
novel_mir2	NM_071840.3	-34.8	0.0932	-32.15	173	Y61A9LA.3	-	-	gi|17566134|ref|NP_504241.1|	0	Uncharacterized protein CELE_Y61A9LA.3 [Caenorhabditis elegans]
novel_mir2	NM_001307108.1	-31.2	0.604639	-26.19	164	wnk-1	GO:0005829,GO:0005515,GO:0004674,GO:0005524,GO:0000122,GO:0007275,GO:0018991,GO:0032414,GO:2000021,GO:0006468,GO:0061404,GO:0050891,GO:0035556,	K08867|1|0.0|3025|cel:CELE_C46C2.1|WNK lysine deficient protein kinase [EC:2.7.11.1]	gi|808357018|ref|NP_001294037.1|	0	Serine/threonine-protein kinase WNK [Caenorhabditis elegans]
novel_mir2	NM_001313074.1	-25.1	0.795955	-33.32	160	Y50D4B.1	-	K14381|1|6.69e-06|52.4|loa:LOAG_01401|sequestosome 1	gi|922580866|ref|NP_001300003.1|	0	Uncharacterized protein CELE_Y50D4B.1 [Caenorhabditis elegans]
novel_mir2	NM_001027397.2	-33.3	0.241654	-33.95	158	rbf-1	GO:0030054,GO:0008021,GO:0005886,GO:0017137,GO:0005509,GO:0005544,GO:0030276,GO:0019905,GO:0006906,GO:1990504,GO:0017158,GO:0040017,GO:0048791,GO:0006886,	K19917|1|0.0|2286|cel:CELE_F37A4.7|double C2-like domain-containing protein beta!K19938|5|4.81e-84|291|crg:105326480|rabphilin-3A	gi|71985465|ref|NP_001022568.1|	0	Rabphilin-1 [Caenorhabditis elegans]
novel_mir2	NR_101864.1	-26.2	0.170224	-25.69	147	Y49E10.36	-	-	-	-	-
novel_mir2	NM_001307490.1	-31.5	0.007067	-28.6	161	F49F1.2	GO:0016021,	-	gi|808357786|ref|NP_001294419.1|	1.17985e-25	Uncharacterized protein CELE_F49F1.2 [Caenorhabditis elegans]
novel_mir2	NM_001276903.1	-31.6	0.139198	-32.51	158	tnt-4	GO:0005861,GO:0006937,	K12046|1|5.14e-65|217|cel:CELE_F53A9.10|troponin T, fast skeletal muscle	gi|453232360|ref|NP_001263832.1|	0	TropoNin T [Caenorhabditis elegans]
novel_mir2	NM_001268362.1	-29.6	0.247271	-26.28	160	elo-3	GO:0030176,GO:0016740,GO:0006633,	K10203|1|6.41e-132|382|loa:LOAG_11536|elongation of very long chain fatty acids protein 6 [EC:2.3.1.199]	gi|392899374|ref|NP_001255291.1|	0	Putative fatty acid elongation protein 3 [Caenorhabditis elegans]
novel_mir2	NM_001307144.1	-33.9	0.18519	-31.06	156	kcc-1	GO:0016021,GO:0015379,GO:0022820,GO:1902476,GO:0007268,GO:0071805,GO:0040011,GO:0009792,	K14427|1|0.0|2136|cel:CELE_R13A1.2|solute carrier family 12 (potassium/chloride transporter), member 4/5/6	gi|808357090|ref|NP_001294073.1|	0	K+/Cl-Cotransporter [Caenorhabditis elegans]
novel_mir2	NM_001306310.1	-31.9	0.752674	-51.98	317	dys-1	GO:0016014,GO:0005856,GO:0055120,GO:0042383,GO:0005277,GO:0008270,GO:0003779,GO:0045214,GO:0015870,GO:0046716,GO:0043056,GO:0040013,GO:0006836,GO:0007626,GO:0072488,GO:0040017,GO:0032224,	K10366|1|1.32e-173|577|gfr:102033021|dystrophin	gi|808354681|ref|NP_001293239.1|	0	DYStrophin related [Caenorhabditis elegans]
novel_mir2	NM_001047360.4	-33.4	0.07973	-26.42	153	Y49F6B.9	GO:0016021,GO:0000151,GO:0005737,GO:0046872,GO:0031624,GO:0061630,GO:0000209,GO:0042787,GO:0032436,	K11972|1|0.0|875|cel:CELE_Y49F6B.9|E3 ubiquitin-protein ligase RNF19A [EC:2.3.2.27]	gi|193205193|ref|NP_001040825.2|	0	Uncharacterized protein CELE_Y49F6B.9 [Caenorhabditis elegans]
novel_mir2	NM_063835.5	-34.1	0.053336	-30.78	161	T09F3.2	GO:0016021,GO:0031966,GO:0003735,GO:0055085,GO:0006839,GO:0006412,	K15116|1|0.0|794|cel:CELE_T09F3.2|solute carrier family 25, member 33/36	gi|17536171|ref|NP_496236.1|	0	Uncharacterized protein CELE_T09F3.2 [Caenorhabditis elegans]
novel_mir2	NM_001038259.1	-32.7	0.132931	-30.85	167	madf-11	GO:0000003,	-	gi|86562656|ref|NP_001033348.1|	0	MADF domain transcription factor [Caenorhabditis elegans]
novel_mir2	NM_063519.3	-32.8	0.014129	-27.97	161	F44G4.3	GO:0016021,	-	gi|17534035|ref|NP_495920.1|	6.58046e-76	Uncharacterized protein CELE_F44G4.3 [Caenorhabditis elegans]
novel_mir2	NM_077909.4	-29.2	0.52446	-30.57	150	M03B6.3	-	-	gi|17568979|ref|NP_510310.1|	0	Uncharacterized protein CELE_M03B6.3 [Caenorhabditis elegans]
novel_mir2	NM_001307170.1	-30.2	0.495808	-28.57	163	Y105C5A.15	GO:0005634,GO:0000977,GO:0003700,GO:0006357,	-	gi|808357142|ref|NP_001294099.1|	0	Uncharacterized protein CELE_Y105C5A.15 [Caenorhabditis elegans]
novel_mir2	NM_001026266.2	-33.1	0.178008	-29.97	149	maph-1.1	GO:0009792,GO:0030163,GO:0019915,GO:0008406,	K10429|1|3.24e-12|76.3|pss:102444752|microtubule-associated protein 1	gi|71985152|ref|NP_001021437.1|	0	Microtubule-Associated Protein Homolog [Caenorhabditis elegans]
novel_mir2	NM_073171.1	-30.1	0.312071	-29.93	153	K08H10.6	GO:0016021,GO:0022857,GO:0055085,	K08148|1|9.59e-43|163|lcm:102348623|MFS transporter, SP family, solute carrier family 2 (facilitated glucose transporter), member 11!K07299|3|4.86e-40|155|cin:100185344|MFS transporter, SP family, solute carrier family 2 (facilitated glucose transporter), member 1	gi|17562398|ref|NP_505572.1|	0	Uncharacterized protein CELE_K08H10.6 [Caenorhabditis elegans]
novel_mir2	NM_001267368.1	-33.2	0.256901	-31.17	162	shn-1	GO:0005515,GO:0030421,GO:0007622,	K15009|1|0.0|2288|cel:CELE_C33B4.3|SH3 and multiple ankyrin repeat domains protein	gi|392891765|ref|NP_001254297.1|	0	SHaNk (SH3/ankyrin domain scaffold protein) related [Caenorhabditis elegans]
novel_mir2	NM_001268985.1	-33.7	0.13462	-33.06	158	Y116A8C.13	GO:0005524,GO:0033554,GO:0009792,	K10877|1|0.0|1495|cel:CELE_Y116A8C.13|DNA repair and recombination protein RAD54B [EC:3.6.4.-]	gi|392902165|ref|NP_001255913.1|	0	Uncharacterized protein CELE_Y116A8C.13 [Caenorhabditis elegans]
novel_mir2	NM_060167.6	-32.6	0.367737	-53.58	308	npp-14	GO:0009792,	K14317|1|0.0|2824|cel:CELE_C03D6.4|nuclear pore complex protein Nup214	gi|17505452|ref|NP_492568.1|	0	Nuclear Pore complex Protein [Caenorhabditis elegans]
novel_mir2	NM_001322637.1	-27.9	0.395655	-26.55	143	trpp-11	-	K20308|1|0.0|578|cel:CELE_B0412.3|trafficking protein particle complex subunit 11	gi|17551872|ref|NP_497264.1|	0	TRansport Protein Particle [Caenorhabditis elegans]
novel_mir2	NM_001028279.3	-35.2	0.061879	-32.36	163	cutl-24	GO:0016021,	-	gi|71996538|ref|NP_001023450.1|	0	CUTiclin-Like [Caenorhabditis elegans]
novel_mir2	NM_075881.5	-31.8	0.076319	-27.71	159	dhs-25	GO:0016491,GO:0055114,	K13370|1|0.0|502|cel:CELE_F09E10.3|17beta-estradiol 17-dehydrogenase / 3alpha(17beta)-hydroxysteroid dehydrogenase (NAD+) [EC:1.1.1.62 1.1.1.239]	gi|25147288|ref|NP_508282.2|	1.08221e-180	DeHydrogenases, Short chain [Caenorhabditis elegans]
novel_mir2	NM_067388.4	-29.6	0.316374	-29.1	149	acc-4	GO:0016021,GO:0005886,GO:0005230,GO:0034220,	K05181|1|5.95e-114|345|loa:LOAG_06725|gamma-aminobutyric acid receptor subunit beta!K05194|2|7.17e-58|201|cin:100185926|glycine receptor alpha-2!K05273|3|1.02e-54|191|cbr:CBG03919|glutamate receptor, anionic, other!K05195|4|1.34e-54|191|xtr:100488938|glycine receptor alpha-3	gi|17555322|ref|NP_499789.1|	0	Acetylcholine-gated Chloride Channel [Caenorhabditis elegans]
novel_mir2	NM_058517.5	-34	0.119906	-31.4	163	Y20F4.4	-	-	gi|808354453|ref|NP_490918.3|	0	Uncharacterized protein CELE_Y20F4.4 [Caenorhabditis elegans]
novel_mir2	NM_001129697.2	-32.4	0.276382	-30.29	157	abts-4	GO:0016323,GO:0005887,GO:0005452,GO:1902476,GO:0051453,	K13856|1|1.43e-98|334|lcm:102356100|solute carrier family 4 (anion exchanger), member 3!K13855|3|2.10e-97|337|cmk:103190096|solute carrier family 4 (anion exchanger), member 2	gi|193210697|ref|NP_001123169.1|	0	Anion/Bicarbonate TranSporter family [Caenorhabditis elegans]
novel_mir2	NM_182160.3	-26.1	0.192845	-26.89	150	F09E5.14	-	-	gi|32564266|ref|NP_871960.1|	2.08813e-52	Uncharacterized protein CELE_F09E5.14 [Caenorhabditis elegans]
novel_mir2	NM_001313036.1	-27.5	0.515754	-51.69	308	glct-6	GO:0016021,GO:0015018,GO:0030204,GO:0050650,GO:0005975,GO:0008340,	K10158|1|4.14e-52|180|cel:CELE_ZK1307.5|galactosylgalactosylxylosylprotein 3-beta-glucuronosyltransferase 3 [EC:2.4.1.135]	gi|922580550|ref|NP_001299964.1|	0	GLuCuronosylTransferase-like [Caenorhabditis elegans]
novel_mir2	NM_001038305.1	-28.8	0.787809	-25.84	162	sax-7	GO:0016021,GO:0016328,GO:0032809,GO:0005913,GO:0032590,GO:0030673,GO:0030017,GO:0030506,GO:0050839,GO:0003384,GO:0042074,GO:0009792,GO:0000132,GO:0048813,	K06756|1|0.0|2306|cel:CELE_C18F3.2|neuronal cell adhesion molecule	gi|86565332|ref|NP_001033394.1|	0	Sensory AXon guidance [Caenorhabditis elegans]
novel_mir2	NM_001306229.1	-31.9	0.062155	-28.02	165	dys-1	GO:0016014,GO:0005856,GO:0055120,GO:0042383,GO:0005277,GO:0008270,GO:0003779,GO:0045214,GO:0015870,GO:0046716,GO:0043056,GO:0040013,GO:0006836,GO:0007626,GO:0072488,GO:0040017,GO:0032224,	K10366|1|1.05e-11|68.9|tsp:Tsp_08040|dystrophin	gi|808354519|ref|NP_001293158.1|	1.29023e-158	DYStrophin related [Caenorhabditis elegans]
novel_mir2	NM_001029656.4	-32.4	0.261527	-30.29	157	abts-4	GO:0016323,GO:0005887,GO:0005452,GO:1902476,GO:0051453,	K13856|1|1.17e-97|331|lgi:LOTGIDRAFT_137764|solute carrier family 4 (anion exchanger), member 3!K13855|2|1.21e-93|325|cmk:103190096|solute carrier family 4 (anion exchanger), member 2	gi|86565066|ref|NP_001024827.2|	0	Anion/Bicarbonate TranSporter family [Caenorhabditis elegans]
novel_mir2	NM_001307495.1	-29.7	0.048382	-27.09	169	F49F1.17	-	-	gi|808357796|ref|NP_001294424.1|	1.1202e-61	Uncharacterized protein CELE_F49F1.17 [Caenorhabditis elegans]
novel_mir2	NM_001129211.1	-30.1	0.492701	-28.86	159	unc-103	GO:0005887,GO:0005249,GO:0007617,GO:0046662,GO:0043050,GO:0071805,GO:0040011,GO:0006937,GO:0042391,GO:0030163,	K04905|1|0.0|1546|cel:CELE_C30D11.1|potassium voltage-gated channel Eag-related subfamily H member 2!K04910|4|0.0|793|crg:105328901|potassium voltage-gated channel Eag-related subfamily H member 7	gi|193205548|ref|NP_001122683.1|	0	Uncharacterized protein CELE_C30D11.1 [Caenorhabditis elegans]
novel_mir2	NM_070980.5	-25.1	0.772644	-33.32	160	Y50D4B.1	-	K14381|1|4.49e-06|52.4|loa:LOAG_01401|sequestosome 1	gi|922580864|ref|NP_001300002.1|	0	Uncharacterized protein CELE_Y50D4B.1 [Caenorhabditis elegans]
novel_mir2	NM_171252.3	-28.7	0.447187	-28.01	152	Y55F3AM.3	GO:0005634,GO:0003723,GO:0000166,GO:0040035,GO:0009792,GO:0002119,GO:0006397,GO:0008340,GO:0040011,GO:0040007,	K13091|1|0.0|914|cel:CELE_Y55F3AM.3|RNA-binding protein 39	gi|17543644|ref|NP_500025.1|	0	Uncharacterized protein CELE_Y55F3AM.3 [Caenorhabditis elegans]
novel_mir2	NM_075902.1	-26.3	0.569308	-26.6	156	ZK380.4	-	-	gi|17570653|ref|NP_508303.1|	6.24638e-180	Uncharacterized protein CELE_ZK380.4 [Caenorhabditis elegans]
novel_mir2	NM_001307554.1	-28.2	0.030732	-25.04	146	C09E9.1	-	-	gi|808357912|ref|NP_001294482.1|	5.07497e-27	Uncharacterized protein CELE_C09E9.1 [Caenorhabditis elegans]
novel_mir2	NR_056251.1	-33	0.001401	-31.8	158	C06A6.10	-	-	-	-	-
novel_mir2	NM_071632.7	-28.4	0.286218	-28.16	159	T27C4.1	GO:0016021,	-	gi|32567039|ref|NP_504033.2|	5.78074e-180	Uncharacterized protein CELE_T27C4.1 [Caenorhabditis elegans]
novel_mir2	NM_001306917.1	-33.9	0.20704	-31.06	156	kcc-1	GO:0016021,GO:0015379,GO:0022820,GO:1902476,GO:0007268,GO:0071805,GO:0040011,GO:0009792,	K14427|1|0.0|2403|cel:CELE_R13A1.2|solute carrier family 12 (potassium/chloride transporter), member 4/5/6	gi|808356636|ref|NP_001293846.1|	0	K+/Cl-Cotransporter [Caenorhabditis elegans]
novel_mir2	NR_003159.1	-28.2	0.477222	-25.34	151	Y116A8C.10	-	-	-	-	-
novel_mir2	NM_001267481.1	-35	0.037709	-30.52	166	Y51H1A.2	-	K19330|1|1.47e-37|149|sko:100377422|run domain Beclin-1 interacting and cysteine-rich containing protein	gi|392892363|ref|NP_001254410.1|	0	Uncharacterized protein CELE_Y51H1A.2 [Caenorhabditis elegans]
novel_mir2	NM_001026029.3	-30.7	0.15995	-29.93	156	prx-10	GO:0005759,GO:0005779,GO:0008270,GO:0004830,GO:0005524,GO:0016558,GO:0006436,GO:0009792,	K13346|1|0.0|648|cel:CELE_C34E10.4|peroxin-10	gi|392894943|ref|NP_001021200.2|	0	Tryptophan--tRNA ligase, mitochondrial [Caenorhabditis elegans]
novel_mir2	NM_076174.3	-31.7	0.303373	-29.45	157	F11D5.1	-	-	gi|17551604|ref|NP_508575.1|	0	Uncharacterized protein CELE_F11D5.1 [Caenorhabditis elegans]
novel_mir2	NM_069563.3	-31.1	0.603907	-57.1	334	R09H10.5	GO:0016021,	K01691|1|2.62e-06|56.2|shr:100924944|WNT inhibitory factor 1	gi|392900528|ref|NP_501964.2|	0	Uncharacterized protein CELE_R09H10.5 [Caenorhabditis elegans]
novel_mir2	NM_001270126.1	-31.4	0.144194	-26.57	151	C02B8.12	GO:0016021,	-	gi|392926623|ref|NP_001257055.1|	0	Uncharacterized protein CELE_C02B8.12 [Caenorhabditis elegans]
novel_mir2	NM_001029241.3	-28.4	0.739302	-33.78	167	nra-3	GO:0008270,	-	gi|71983623|ref|NP_001024412.1|	0	Nicotinic Receptor Associated [Caenorhabditis elegans]
novel_mir2	NM_001313344.1	-32.7	0.075132	-30.88	165	unc-34	GO:0030054,GO:0032433,GO:0031252,GO:0005737,GO:0005102,GO:0016477,GO:0048675,GO:0031103,GO:0008045,GO:0033563,GO:0040017,GO:0035262,	K06274|1|1.23e-20|92.0|tru:105417035|vasodilator-stimulated phosphoprotein!K05746|3|1.54e-20|90.1|bfo:BRAFLDRAFT_256955|enabled	gi|922581406|ref|NP_001300273.1|	0	Uncharacterized protein CELE_Y50D4C.1 [Caenorhabditis elegans]
novel_mir2	NM_001268313.1	-39.6	0.005942	-34.65	160	Y54G2A.57	-	-	gi|392898552|ref|NP_001255242.1|	0	Uncharacterized protein CELE_Y54G2A.57 [Caenorhabditis elegans]
novel_mir2	NM_075151.3	-28.8	0.676256	-35.71	147	C31G12.4	-	K04574|1|1.76e-08|63.9|amj:102562405|neurofilament heavy polypeptide	gi|392922713|ref|NP_507552.3|	0	Uncharacterized protein CELE_C31G12.4 [Caenorhabditis elegans]
novel_mir2	NM_001267411.1	-30.9	0.357866	-27.71	160	sop-2	GO:0016607,GO:0031625,GO:0003723,GO:0042803,GO:0007411,GO:0016055,GO:0018991,GO:0040015,GO:0030334,GO:0042659,GO:0006915,GO:0040034,GO:0045892,GO:0002119,GO:0009952,GO:0048665,GO:0010607,GO:0040029,	-	gi|392892040|ref|NP_001254340.1|	0	Suppressor of Pal-1 [Caenorhabditis elegans]
novel_mir2	NM_071566.3	-38.7	0.014557	-36.88	168	slc-28.1	GO:0005887,GO:0005415,GO:1901642,	K11536|1|0.0|1156|cel:CELE_F27E11.1|pyrimidine nucleoside transport protein	gi|17560276|ref|NP_503967.1|	0	Sodium/nucleoside cotransporter [Caenorhabditis elegans]
novel_mir2	NM_001313075.1	-32.8	0.39806	-31.22	174	arid-1	GO:0017053,GO:0005634,GO:0044212,GO:0006357,	K19194|1|1.29e-29|134|mze:101464646|AT-rich interactive domain-containing protein 4A!K07874|5|3.01e-29|133|hst:105188116|Ras-related protein Rab-1A	gi|922580868|ref|NP_001300004.1|	0	ARID (AT-rich Interactive Domain-containing protein) homolog [Caenorhabditis elegans]
novel_mir2	NM_074843.5	-30.7	0.571466	-26.72	150	cand-1	GO:0005634,GO:0005515,GO:0010265,GO:0051437,	K17263|1|0.0|2611|cel:CELE_Y102A5A.1|cullin-associated NEDD8-dissociated protein 1	gi|17566356|ref|NP_507244.1|	0	Cullin-associated NEDD8-dissociated protein 1 [Caenorhabditis elegans]
novel_mir2	NM_001267525.1	-28.1	0.591587	-25.85	151	pde-3	GO:0004114,GO:0046872,GO:0010446,GO:0008340,GO:0010628,GO:0007602,GO:0042542,GO:0007635,GO:0006935,GO:0030827,	K19021|1|0.0|968|cel:CELE_E01F3.1|cGMP-inhibited 3',5'-cyclic phosphodiesterase A [EC:3.1.4.17]	gi|392892615|ref|NP_001254454.1|	0	Probable 3',5'-cyclic phosphodiesterase pde-3 [Caenorhabditis elegans]
novel_mir2	NM_001269528.1	-28.4	0.721387	-25.14	161	ZC455.1	-	-	gi|392921272|ref|NP_001256457.1|	0	Uncharacterized protein CELE_ZC455.1 [Caenorhabditis elegans]
novel_mir2	NM_001028186.3	-31	0.430885	-25.91	152	T04C4.1	-	K20401|1|0.0|1982|cel:CELE_T04C4.1|folliculin-interacting protein 2	gi|86574953|ref|NP_001023357.2|	0	Uncharacterized protein CELE_T04C4.1 [Caenorhabditis elegans]
novel_mir2	NR_068754.1	-27.9	0.034513	-27.44	165	C24G6.10	-	-	-	-	-
novel_mir2	NM_075440.4	-28.9	0.744629	-27.47	154	pcp-4	GO:0045121,GO:0004185,GO:0008239,GO:0006508,	K09649|1|2.67e-57|211|sko:100377982|thymus-specific serine protease [EC:3.4.-.-]	gi|17566516|ref|NP_507841.1|	0	Prolyl Carboxy Peptidase like [Caenorhabditis elegans]
novel_mir2	NM_070777.2	-28.6	0.742535	-50.51	319	atg-9	GO:0016021,	K17907|1|0.0|1929|cel:CELE_T22H9.2|autophagy-related protein 9	gi|922580676|ref|NP_503178.2|	0	AuTophaGy (yeast Atg homolog) [Caenorhabditis elegans]
novel_mir2	NM_001313464.1	-34.6	0.316002	-33.76	165	F22G12.5	GO:0005622,GO:0005085,GO:0043547,GO:0007264,	K13708|1|2.01e-08|65.9|mde:101891400|dedicator of cytokinesis protein 1!K17697|3|3.97e-06|58.2|cmy:102941448|dedicator of cytokinesis protein 4	gi|922581831|ref|NP_001300393.1|	0	Uncharacterized protein CELE_F22G12.5 [Caenorhabditis elegans]
novel_mir2	NM_001028926.2	-26.1	0.79408	-25.49	153	num-1	GO:0005856,GO:0005887,GO:0005938,GO:0016323,GO:0005080,GO:0005068,GO:0019904,GO:0051117,GO:0032456,GO:0007275,GO:0007169,GO:0015914,GO:0006612,	K06057|1|2.79e-156|461|cel:CELE_T03D8.1|numb	gi|72000287|ref|NP_001024097.1|	0	Numb-related protein 1 [Caenorhabditis elegans]
novel_mir2	NM_171668.6	-26.8	0.680991	-28.99	149	paf-2	GO:0005789,GO:0005829,GO:0003847,GO:0009792,GO:0016331,GO:0016042,GO:0000003,	K01062|1|0.0|811|cel:CELE_C52B9.7|platelet-activating factor acetylhydrolase [EC:3.1.1.47]	gi|25150368|ref|NP_741768.1|	0	Platelet-activating factor acetylhydrolase homolog 2 [Caenorhabditis elegans]
novel_mir2	NM_070758.4	-33.8	0.115543	-33.86	157	kin-33	GO:0005524,GO:0004674,GO:0006468,GO:0007369,	K02216|1|6.08e-84|277|cel:CELE_Y39H10A.7|serine/threonine-protein kinase Chk1 [EC:2.7.11.1]	gi|392918121|ref|NP_503159.3|	0	protein KINase [Caenorhabditis elegans]
novel_mir2	NM_063573.4	-26.5	0.485857	-34.04	162	C01G6.2	GO:0016021,	-	gi|17531433|ref|NP_495974.1|	1.16192e-147	Uncharacterized protein CELE_C01G6.2 [Caenorhabditis elegans]
novel_mir2	NM_001047693.2	-32.7	0.028567	-28.01	160	T02B11.9	-	-	gi|922580710|ref|NP_001041158.2|	6.91893e-118	Uncharacterized protein CELE_T02B11.9 [Caenorhabditis elegans]
novel_mir2	NM_077330.3	-29.7	0.592305	-28.37	156	R07E3.6	-	-	gi|17569309|ref|NP_509731.1|	0	Uncharacterized protein CELE_R07E3.6 [Caenorhabditis elegans]
novel_mir2	NM_058806.4	-29.7	0.673006	-126.06	642	glh-4	GO:0043186,GO:0003723,GO:0004004,GO:0008270,GO:0005524,GO:0008432,GO:0007276,GO:0010501,GO:0010468,GO:0000398,GO:0042127,	K13982|1|5.46e-107|363|cel:CELE_C55B7.1|probable ATP-dependent RNA helicase DDX4 [EC:3.6.4.13]	gi|71990816|ref|NP_491207.3|	0	ATP-dependent RNA helicase glh-4 [Caenorhabditis elegans]
novel_mir2	NM_068897.3	-29.3	0.393712	-30.18	148	cdgs-1	GO:0016021,GO:0005789,GO:0004605,GO:0016024,GO:0006655,GO:0008340,GO:0000003,GO:0002119,GO:0040011,	K00981|1|0.0|920|cel:CELE_C33H5.18|phosphatidate cytidylyltransferase [EC:2.7.7.41]	gi|17539016|ref|NP_501298.1|	0	Phosphatidate cytidylyltransferase [Caenorhabditis elegans]
novel_mir2	NM_067047.4	-30.8	0.381494	-25.3	160	obr-1	GO:0006869,GO:0009792,	K20456|1|0.0|1612|cel:CELE_Y47D3A.17|oxysterol-binding protein 1!K20462|5|0.0|681|gja:107105980|oxysterol-binding protein 2	gi|17555950|ref|NP_499448.1|	0	Oxysterol-binding protein [Caenorhabditis elegans]
novel_mir2	NM_073796.5	-29.3	0.219356	-27.19	158	fkb-4	GO:0003755,GO:0006457,GO:0000413,	K09575|1|3.44e-118|343|cbr:CBG12033|FK506-binding protein 9/10 [EC:5.2.1.8]	gi|17561780|ref|NP_506197.1|	0	Peptidyl-prolyl cis-trans isomerase [Caenorhabditis elegans]
novel_mir2	NM_001028414.1	-29.1	0.498132	-33.21	148	Y77E11A.7	GO:0005515,GO:0009792,GO:0008340,GO:0040035,GO:0002119,GO:0040011,	-	gi|71999621|ref|NP_001023585.1|	0	Uncharacterized protein CELE_Y77E11A.7 [Caenorhabditis elegans]
novel_mir2	NM_170857.3	-29.8	0.761991	-25.46	159	npp-6	GO:0005643,GO:0005487,GO:0009792,GO:0002119,GO:0043652,GO:0006997,GO:0006913,GO:0006898,GO:0040039,	K14303|1|0.0|3242|cel:CELE_F56A3.3|nuclear pore complex protein Nup160	gi|25150095|ref|NP_740844.1|	0	Nuclear Pore complex Protein [Caenorhabditis elegans]
novel_mir2	NM_066164.7	-31.3	0.135189	-28.62	161	rnp-7	GO:0071011,GO:0005685,GO:0071004,GO:0000243,GO:0003729,GO:0030619,GO:0000166,GO:0000398,GO:0040035,GO:0002119,GO:0007281,GO:0009792,	K11093|1|0.0|653|cel:CELE_K04G7.10|U1 small nuclear ribonucleoprotein 70kDa	gi|25152876|ref|NP_498565.2|	0	RNP (RRM RNA binding domain) containing [Caenorhabditis elegans]
novel_mir2	NM_001028343.2	-34.9	0.069719	-33.99	156	lem-4	GO:0016021,GO:0031965,GO:0005783,GO:0051721,GO:0051301,GO:0042326,GO:0035307,GO:0009792,GO:0007084,	K14829|1|3.10e-33|141|dpl:KGM_15711|pre-rRNA-processing protein IPI3	gi|71999267|ref|NP_001023514.1|	0	Ankyrin repeat and LEM domain-containing protein 2 homolog [Caenorhabditis elegans]
novel_mir2	NM_059340.4	-29.9	0.553966	-48.09	310	vps-34	GO:0005942,GO:0001891,GO:0005640,GO:0005737,GO:0005730,GO:0042995,GO:0016303,GO:0005524,GO:0061365,GO:0050708,GO:0008340,GO:0036092,GO:0000003,GO:0040007,GO:0042395,GO:0040011,GO:0006998,GO:0048015,GO:0002119,GO:0006914,GO:0090386,GO:1901076,GO:0046854,	K00914|1|0.0|1872|cel:CELE_B0025.1|phosphatidylinositol 3-kinase [EC:2.7.1.137]	gi|17509429|ref|NP_491741.1|	0	Phosphatidylinositol 3-kinase [Caenorhabditis elegans]
novel_mir2	NR_051272.1	-31.1	0.007251	-31.27	165	F31E8.17	-	-	-	-	-
novel_mir2	NM_074290.4	-27.2	0.580816	-70.18	448	fib-1	GO:0015030,GO:0031428,GO:0032040,GO:0008649,GO:0003723,GO:1990259,GO:0031167,GO:0008406,GO:1990258,GO:0045727,GO:0000494,GO:0009792,GO:0008033,GO:0002119,GO:0016477,	K14563|1|0.0|676|cel:CELE_T01C3.7|rRNA 2'-O-methyltransferase fibrillarin [EC:2.1.1.-]	gi|17563672|ref|NP_506691.1|	0	rRNA 2'-O-methyltransferase fibrillarin [Caenorhabditis elegans]
novel_mir2	NM_067000.4	-26.7	0.5125	-28.09	155	vab-7	GO:0005634,GO:0043565,GO:0006355,GO:0010171,GO:0040011,GO:0009792,	K09320|1|2.72e-40|140|bmy:Bm1_41620|homeobox even-skipped homolog protein	gi|1232167|emb|CAA65441.1|	0	vab-7 [Caenorhabditis elegans]
novel_mir2	NM_001267444.1	-30	0.12702	-27.1	156	Y81G3A.4	-	-	gi|392892207|ref|NP_001254373.1|	2.73194e-154	Uncharacterized protein CELE_Y81G3A.4 [Caenorhabditis elegans]
novel_mir2	NM_058918.5	-27.8	0.50264	-25.18	151	rpn-8	GO:0000502,GO:0005515,GO:0009792,GO:0002119,GO:0043161,GO:0000003,GO:0008340,	K03038|1|0.0|741|cel:CELE_R12E2.3|26S proteasome regulatory subunit N8	gi|17508685|ref|NP_491319.1|	0	proteasome Regulatory Particle, Non-ATPase-like [Caenorhabditis elegans]
novel_mir2	NM_001029307.2	-25.8	0.750411	-26.15	150	ref-2	GO:0005737,GO:0005634,GO:0003676,GO:0046872,GO:0000166,GO:0018991,GO:0048665,GO:0040035,GO:0019915,GO:0002119,GO:0040011,GO:0006352,	K09227|1|0.0|664|cel:CELE_C47C12.3|zinc finger protein ZIC, invertebrate!K06235|3|8.16e-56|186|umr:103657640|zinc finger protein ZIC 2	gi|71985689|ref|NP_001024478.1|	0	REgulator of Fusion [Caenorhabditis elegans]
novel_mir2	NM_001029569.2	-35.7	0.073736	-35.08	166	eat-20	GO:0009986,GO:0030424,GO:0016021,GO:0005509,GO:0040035,GO:0030163,	K02599|1|5.71e-17|91.3|crg:105322166|Notch 1!K17495|4|1.35e-15|87.4|tup:102500773|CUB and sushi domain-containing protein	gi|71992678|ref|NP_001024740.1|	0	Abnormal pharyngeal pumping eat-20 [Caenorhabditis elegans]
novel_mir2	NM_181929.4	-30.3	0.458168	-57.94	309	T28D6.5	GO:0016021,GO:0009792,GO:0040007,GO:0040035,GO:0002119,	-	gi|392896717|ref|NP_001255123.1|	0	Uncharacterized protein CELE_T28D6.5 [Caenorhabditis elegans]
novel_mir2	NM_066226.1	-35.7	0.017646	-27.98	155	numr-1	GO:0005634,	-	gi|17552944|ref|NP_498627.1|	0	NUclear localized Metal Responsive [Caenorhabditis elegans]
novel_mir2	NM_068146.1	-28.7	0.557195	-26.77	154	W03B1.5	-	-	gi|17542756|ref|NP_500547.1|	0	Uncharacterized protein CELE_W03B1.5 [Caenorhabditis elegans]
novel_mir2	NR_053122.1	-27.7	0.143808	-26.65	152	F28E10.10	-	-	-	-	-
novel_mir2	NM_001267478.1	-35	0.115645	-30.52	166	Y51H1A.2	-	K19330|1|5.90e-37|155|sko:100377422|run domain Beclin-1 interacting and cysteine-rich containing protein	gi|392892357|ref|NP_001254407.1|	0	Uncharacterized protein CELE_Y51H1A.2 [Caenorhabditis elegans]
novel_mir2	NM_062158.4	-31.9	0.190861	-32.46	158	smu-2	GO:0005730,GO:0005515,GO:0006629,GO:0007638,GO:0048644,GO:0000381,GO:0019915,GO:0002119,GO:0040011,GO:0048666,GO:0009792,	K13109|1|0.0|1098|cel:CELE_Y49F6B.4|IK cytokine	gi|17535725|ref|NP_494559.1|	0	Suppressor of Mec and Unc defects [Caenorhabditis elegans]
novel_mir2	NM_075438.3	-27.2	0.635413	-49.6	310	Y116F11B.2	-	-	gi|392923074|ref|NP_507839.3|	0	Uncharacterized protein CELE_Y116F11B.2 [Caenorhabditis elegans]
novel_mir2	NM_182345.3	-30	0.329629	-29.29	156	Y51A2D.13	GO:0016021,GO:0003824,GO:0008152,	K16860|1|2.89e-139|416|tsp:Tsp_09561|phospholipase D3/4 [EC:3.1.4.4]	gi|32566758|ref|NP_872145.1|	0	Uncharacterized protein CELE_Y51A2D.13 [Caenorhabditis elegans]
novel_mir2	NM_066340.4	-29.8	0.5143	-97.92	613	clp-1	GO:0031430,GO:0004198,GO:0010940,GO:0006508,	K08585|1|0.0|1568|cel:CELE_C06G4.2|calpain, invertebrate [EC:3.4.22.-]	gi|71981301|ref|NP_498741.3|	0	Calpain clp-1 [Caenorhabditis elegans]
novel_mir2	NR_068845.1	-25.5	0.111966	-25.5	153	F12F3.7	-	-	-	-	-
novel_mir2	NM_069197.5	-31.2	0.448007	-28.64	149	pcp-3	GO:0008236,GO:0006508,	K09649|1|3.47e-66|237|sko:100377982|thymus-specific serine protease [EC:3.4.-.-]	gi|133930823|ref|NP_501598.2|	0	Prolyl Carboxy Peptidase like [Caenorhabditis elegans]
novel_mir2	NM_001268206.1	-35.5	0.035139	-28	161	crh-1	GO:0005634,GO:0001223,GO:0043565,GO:0003700,GO:0035556,GO:0008340,GO:0045944,GO:0040040,	K09050|1|0.0|545|cel:CELE_Y41C4A.4|cAMP response element-binding protein, invertebrate	gi|392896794|ref|NP_001255135.1|	0	CREB Homolog [Caenorhabditis elegans]
novel_mir2	NM_067624.4	-28.7	0.556531	-28.01	152	Y55F3AM.3	GO:0005634,GO:0003723,GO:0000166,GO:0040035,GO:0009792,GO:0002119,GO:0006397,GO:0008340,GO:0040011,GO:0040007,	K13091|1|0.0|1181|cel:CELE_Y55F3AM.3|RNA-binding protein 39	gi|17543644|ref|NP_500025.1|	0	Uncharacterized protein CELE_Y55F3AM.3 [Caenorhabditis elegans]
novel_mir2	NM_001268192.1	-30.3	0.459489	-57.94	309	T28D6.5	GO:0016021,GO:0009792,GO:0040007,GO:0040035,GO:0002119,	-	gi|392896711|ref|NP_001255121.1|	0	Uncharacterized protein CELE_T28D6.5 [Caenorhabditis elegans]
novel_mir2	NM_001026267.2	-33.1	0.205465	-29.97	149	maph-1.1	GO:0009792,GO:0030163,GO:0019915,GO:0008406,	K10429|1|2.98e-12|76.6|chx:102176074|microtubule-associated protein 1	gi|71985154|ref|NP_001021438.1|	0	Microtubule-Associated Protein Homolog [Caenorhabditis elegans]
novel_mir2	NM_067525.5	-32.1	0.311852	-25.99	155	daf-18	GO:0030425,GO:0043025,GO:0030424,GO:0009898,GO:0005634,GO:0016314,GO:0005515,GO:0004725,GO:0008340,GO:0042992,GO:0007611,GO:0050927,GO:0061066,GO:1902074,GO:0043053,GO:0046856,GO:0007635,GO:0019915,GO:0035335,GO:0050919,GO:0009408,GO:0040025,	K01110|1|0.0|2019|cel:CELE_T07A9.6|phosphatidylinositol-3,4,5-trisphosphate 3-phosphatase and dual-specificity protein phosphatase PTEN [EC:3.1.3.16 3.1.3.48 3.1.3.67]	gi|17539552|ref|NP_499926.1|	0	Uncharacterized protein CELE_T07A9.6 [Caenorhabditis elegans]
novel_mir2	NM_171297.3	-31.5	0.156418	-29.63	156	ser-6	GO:0016021,GO:0004989,GO:1904122,	K04165|1|4.98e-68|226|isc:IscW_ISCW003835|Octopamine receptor!K04140|2|1.37e-50|181|sko:100373264|adrenergic receptor alpha-2C!K04138|3|9.62e-49|174|mze:101483007|adrenergic receptor alpha-2A!K04153|5|6.04e-47|169|ame:406110|5-hydroxytryptamine receptor 1	gi|25153741|ref|NP_741350.1|	0	SERotonin/octopamine receptor family [Caenorhabditis elegans]
novel_mir2	NM_067740.4	-29.7	0.527973	-74.62	451	egl-4	GO:0005829,GO:0005634,GO:0046872,GO:0030553,GO:0005524,GO:0004692,GO:0030827,GO:0010468,GO:0030512,GO:0042542,GO:0046662,GO:0007635,GO:0040015,GO:1990834,GO:0030431,GO:0008340,GO:0006935,GO:0051343,GO:0050913,GO:0046621,GO:0050849,GO:1903998,GO:0018105,GO:0070482,GO:0030536,GO:0061067,GO:0030163,GO:0030308,GO:1902160,GO:0008286,GO:0010753,	K07376|1|0.0|1605|cel:CELE_F55A8.2|cGMP-dependent protein kinase 1 [EC:2.7.11.12]	gi|17539608|ref|NP_500141.1|	0	cGMP-dependent protein kinase egl-4 [Caenorhabditis elegans]
novel_mir2	NM_001313322.1	-28	0.370081	-27.27	154	Y46H3A.5	GO:0016787,GO:0006629,	-	gi|392918392|ref|NP_503511.2|	0	Uncharacterized protein CELE_Y46H3A.5 [Caenorhabditis elegans]
novel_mir2	NM_001313082.1	-29.8	0.550053	-27.5	156	daf-11	GO:0016021,GO:0008074,GO:0005886,GO:0043204,GO:0030425,GO:0005525,GO:0004672,GO:0004383,GO:0046872,GO:0005524,GO:0004016,GO:0001306,GO:0071321,GO:0007608,GO:0050920,GO:0008355,GO:0007168,GO:0042542,GO:0070781,GO:0043327,GO:0007602,GO:0030511,GO:0009266,GO:0008340,GO:0019236,GO:0009792,GO:0030516,GO:0006182,GO:0061067,GO:0035556,GO:0010628,GO:0009593,GO:0006355,GO:0006468,	K01769|1|1.10e-112|375|cel:CELE_ZK896.8|guanylate cyclase, other [EC:4.6.1.2]!K12323|4|9.54e-87|290|hro:HELRODRAFT_77609|atrial natriuretic peptide receptor A [EC:4.6.1.2]	gi|212646197|ref|NP_505960.3|	0	Receptor-type guanylate cyclase daf-11 [Caenorhabditis elegans]
novel_mir2	NM_076201.4	-30.9	0.318826	-31.43	148	C12D12.1	GO:0016020,	-	gi|17550356|ref|NP_508602.1|	0	Uncharacterized protein CELE_C12D12.1 [Caenorhabditis elegans]
novel_mir2	NM_001306394.1	-28.5	0.40746	-29.45	165	dot-1.1	GO:0005634,GO:0031151,GO:0051726,GO:0034729,	K11427|1|0.0|743|cel:CELE_Y39G10AR.18|histone-lysine N-methyltransferase, H3 lysine-79 specific [EC:2.1.1.43]	gi|71994293|ref|NP_740808.2|	0	Histone-lysine N-methyltransferase, H3 lysine-79 specific [Caenorhabditis elegans]
novel_mir2	NM_063454.5	-28.1	0.234864	-28.07	165	cyn-11	GO:0003755,GO:0006457,GO:0000413,	K09567|1|4.03e-135|379|cel:CELE_T01B7.4|peptidyl-prolyl isomerase H (cyclophilin H) [EC:5.2.1.8]	gi|17532643|ref|NP_495855.1|	3.35304e-134	Peptidyl-prolyl cis-trans isomerase 11 [Caenorhabditis elegans]
novel_mir2	NM_001129213.1	-30.1	0.485577	-28.86	159	unc-103	GO:0005887,GO:0005249,GO:0007617,GO:0046662,GO:0043050,GO:0071805,GO:0040011,GO:0006937,GO:0042391,GO:0030163,	K04905|1|0.0|1543|cel:CELE_C30D11.1|potassium voltage-gated channel Eag-related subfamily H member 2!K04910|4|0.0|791|crg:105328901|potassium voltage-gated channel Eag-related subfamily H member 7	gi|193205552|ref|NP_001122685.1|	0	Uncharacterized protein CELE_C30D11.1 [Caenorhabditis elegans]
novel_mir2	NM_063460.3	-30.2	0.25241	-28.23	157	atf-2	GO:0005634,GO:0043565,GO:0001012,GO:0005515,GO:0001078,GO:0007623,GO:0000122,GO:0019915,	K12114|1|1.80e-12|74.3|dpe:Dper_GL19569|vrille	gi|17534989|ref|NP_495861.1|	0	ATF (cAMP-dependent transcription factor) family [Caenorhabditis elegans]
novel_mir2	NM_001268947.1	-30.2	0.454309	-28.57	163	Y105C5A.15	GO:0005634,GO:0000977,GO:0003700,GO:0006357,	-	gi|392902028|ref|NP_001255876.1|	0	Uncharacterized protein CELE_Y105C5A.15 [Caenorhabditis elegans]
novel_mir2	NM_063082.4	-30.3	0.272959	-67.5	445	fust-1	GO:0003676,GO:0000166,GO:0008270,GO:0000003,	K14651|1|0.0|812|cel:CELE_C27H5.3|transcription initiation factor TFIID subunit 15!K13098|5|3.17e-15|82.8|sko:100378778|RNA-binding protein FUS	gi|17532119|ref|NP_495483.1|	0	FUS/TLS RNA binding protein homolog [Caenorhabditis elegans]
novel_mir2	NM_058955.5	-33.1	0.081738	-31.24	170	ZK973.8	GO:0007413,GO:0016358,	-	gi|17511141|ref|NP_491356.1|	0	Uncharacterized protein CELE_ZK973.8 [Caenorhabditis elegans]
novel_mir2	NM_001129332.2	-28.2	0.314172	-25.34	151	Y116A8C.10	GO:0005622,GO:0005525,GO:0007264,	K07933|1|0.0|509|cel:CELE_Y116A8C.10|Rab-like protein 3	gi|193206686|ref|NP_001122804.1|	0	Uncharacterized protein CELE_Y116A8C.10 [Caenorhabditis elegans]
novel_mir2	NM_058513.2	-32	0.152859	-33.12	162	Y71G12A.4	GO:0016021,	K06889|1|1.88e-10|67.4|crg:105341854|uncharacterized protein	gi|25143554|ref|NP_490914.2|	0	Uncharacterized protein CELE_Y71G12A.4 [Caenorhabditis elegans]
novel_mir2	NM_001306313.1	-31.9	0.770644	-51.98	317	dys-1	GO:0016014,GO:0005856,GO:0055120,GO:0042383,GO:0005277,GO:0008270,GO:0003779,GO:0045214,GO:0015870,GO:0046716,GO:0043056,GO:0040013,GO:0006836,GO:0007626,GO:0072488,GO:0040017,GO:0032224,	K10366|1|7.90e-174|578|gfr:102033021|dystrophin	gi|808354687|ref|NP_001293242.1|	0	DYStrophin related [Caenorhabditis elegans]
novel_mir2	NM_001025825.3	-28.8	0.72784	-25.07	157	lin-10	GO:0030054,GO:0032580,GO:0030425,GO:0000138,GO:0045202,GO:0043025,GO:0030140,GO:0005886,GO:0017137,GO:0006810,GO:0008105,GO:1903361,GO:0050975,GO:1902946,GO:0097120,GO:0007399,GO:0007270,GO:0040026,	K20055|1|1.03e-157|474|aml:100464192|amyloid beta A4 precursor protein-binding family A member 2	gi|71980634|ref|NP_001020996.1|	0	Protein lin-10 [Caenorhabditis elegans]
novel_mir2	NM_170819.5	-28.5	0.700721	-26.25	150	npp-13	GO:0005643,GO:0017056,GO:0005515,GO:0051292,GO:0006606,GO:0009792,GO:0000132,GO:0016973,	K14309|1|0.0|1640|cel:CELE_Y37E3.15|nuclear pore complex protein Nup93	gi|25143580|ref|NP_740802.1|	0	Nuclear Pore complex Protein [Caenorhabditis elegans]
novel_mir2	NM_064412.1	-29.3	0.276469	-27.58	158	Y48C3A.3	-	K17776|1|7.56e-13|72.4|obi:106878396|metaxin	gi|17537211|ref|NP_496813.1|	0	Uncharacterized protein CELE_Y48C3A.3 [Caenorhabditis elegans]
novel_mir2	NM_001306311.1	-31.9	0.65104	-28.02	165	dys-1	GO:0016014,GO:0005856,GO:0055120,GO:0042383,GO:0005277,GO:0008270,GO:0003779,GO:0045214,GO:0015870,GO:0046716,GO:0043056,GO:0040013,GO:0006836,GO:0007626,GO:0072488,GO:0040017,GO:0032224,	K10366|1|2.05e-174|577|gfr:102033021|dystrophin	gi|808354681|ref|NP_001293239.1|	0	DYStrophin related [Caenorhabditis elegans]
novel_mir2	NM_063700.3	-28.1	0.789038	-26.75	153	nos-3	GO:0005737,GO:0005515,GO:0040022,GO:0045836,	-	gi|17537421|ref|NP_496101.1|	0	NanOS related [Caenorhabditis elegans]
novel_mir2	NM_001269526.1	-28.4	0.755911	-25.14	161	ZC455.1	-	-	gi|392921268|ref|NP_001256455.1|	0	Uncharacterized protein CELE_ZC455.1 [Caenorhabditis elegans]
novel_mir2	NM_077650.2	-29.3	0.41125	-28.64	163	C04B4.4	-	-	gi|392927556|ref|NP_510051.2|	0	Uncharacterized protein CELE_C04B4.4 [Caenorhabditis elegans]
novel_mir2	NM_001313064.1	-32.1	0.109418	-30.03	170	B0348.5	-	-	gi|922580846|ref|NP_001299993.1|	0	Uncharacterized protein CELE_B0348.5 [Caenorhabditis elegans]
novel_mir2	NM_001268408.1	-28.9	0.178771	-26.34	151	grsp-2	-	-	gi|392899810|ref|NP_001255337.1|	1.46826e-92	Glycine Rich Secreted Protein [Caenorhabditis elegans]
novel_mir2	NM_001029498.3	-31.9	0.171834	-25.44	158	kin-20	GO:0005737,GO:0005634,GO:0004674,GO:0005524,GO:0018105,GO:0008360,GO:0000003,GO:0048511,GO:0010171,GO:0016055,GO:0002119,GO:0040011,GO:0006897,GO:0009792,GO:0040018,	K08959|1|0.0|528|bmy:Bm1_37175|casein kinase 1, delta [EC:2.7.11.1]!K08960|3|0.0|521|loa:LOAG_05803|casein kinase 1, epsilon [EC:2.7.11.1]	gi|71990385|ref|NP_001024669.1|	0	Casein kinase I isoform delta [Caenorhabditis elegans]
novel_mir2	NM_068138.4	-32.3	0.450854	-56.1	303	set-9	-	K09189|1|1.18e-30|138|loa:LOAG_02935|histone-lysine N-methyltransferase MLL5 [EC:2.1.1.43]	gi|808355952|ref|NP_500539.2|	0	SET (trithorax/polycomb) domain containing [Caenorhabditis elegans]
novel_mir2	NM_001129476.3	-32.5	0.112651	-50.57	299	F53E4.1	GO:0000003,	K14966|1|2.91e-23|107|gja:107119918|host cell factor	gi|193208117|ref|NP_001122948.1|	0	Uncharacterized protein CELE_F53E4.1 [Caenorhabditis elegans]
novel_mir2	NM_069151.4	-27.1	0.487337	-55.99	322	slc-25A26	GO:0016021,GO:0003735,GO:0006810,GO:0006412,	K15111|1|0.0|548|cel:CELE_D1046.3|solute carrier family 25 (mitochondrial S-adenosylmethionine transporter), member 26	gi|17539504|ref|NP_501552.1|	0	Uncharacterized protein CELE_D1046.3 [Caenorhabditis elegans]
novel_mir2	NM_001026479.2	-32.3	0.650023	-31.01	169	hmr-1	GO:0016021,GO:0005913,GO:0016342,GO:0008013,GO:0005509,GO:0070097,GO:0003384,GO:0007016,GO:0007156,GO:0000003,GO:0043053,GO:0010171,GO:0007413,GO:0006898,GO:0042074,GO:0009792,GO:0000132,	K16506|1|1.50e-154|547|adf:107335756|protocadherin Fat 1/2/3	gi|71991933|ref|NP_001021650.1|	0	Cadherin-related hmr-1 [Caenorhabditis elegans]
novel_mir2	NR_068612.1	-29.9	0.013656	-30.6	156	Y46H3D.9	-	-	-	-	-
novel_mir2	NM_077283.2	-27.9	0.733827	-28.11	144	ZC374.2	-	K16910|1|1.20e-06|57.8|gga:772163|receptor-type tyrosine-protein phosphatase Q [EC:3.1.3.48]	gi|212659378|ref|NP_509684.2|	0	Uncharacterized protein CELE_ZC374.2 [Caenorhabditis elegans]
novel_mir2	NM_001028346.3	-29.9	0.503114	-27.83	165	tag-273	GO:0008270,GO:0000003,	-	gi|212659289|ref|NP_001023517.2|	0	Uncharacterized protein CELE_Y57G11A.1 [Caenorhabditis elegans]
novel_mir2	NM_078262.4	-35.1	0.210413	-32.97	154	let-2	GO:0005587,GO:0030020,GO:0009792,GO:0002119,GO:0040018,GO:0000003,GO:0035188,GO:0016043,GO:0040039,	K06237|1|0.0|3136|cel:CELE_F01G12.5|collagen, type IV, alpha	gi|17568913|ref|NP_510663.1|	0	Collagen alpha-2(IV) chain [Caenorhabditis elegans]
novel_mir2	NM_001129422.2	-26.2	0.488955	-25.16	155	zhit-1	GO:0000812,GO:0031491,GO:0042826,GO:0031063,GO:0006915,GO:0040027,GO:0043486,GO:0016246,	K11663|1|6.99e-144|402|cel:CELE_CD4.7|zinc finger HIT domain-containing protein 1	gi|193207579|ref|NP_001122894.1|	5.81588e-143	Zinc finger, HIT-type [Caenorhabditis elegans]
novel_mir2	NM_001027395.3	-33.3	0.225088	-33.95	158	rbf-1	GO:0030054,GO:0008021,GO:0005886,GO:0017137,GO:0005509,GO:0005544,GO:0030276,GO:0019905,GO:0006906,GO:1990504,GO:0017158,GO:0040017,GO:0048791,GO:0006886,	K19917|1|0.0|1984|cel:CELE_F37A4.7|double C2-like domain-containing protein beta!K19938|5|1.83e-84|291|crg:105326480|rabphilin-3A	gi|71985454|ref|NP_001022566.1|	0	Rabphilin-1 [Caenorhabditis elegans]
novel_mir2	NM_058843.5	-35.4	0.089443	-28.24	169	hcp-4	GO:0000776,GO:0000779,GO:0005654,GO:0005737,GO:0005515,GO:0051382,GO:0008608,GO:0007080,GO:0000003,GO:0070199,GO:0006898,GO:0009792,GO:0010697,	-	gi|17508837|ref|NP_491244.1|	0	HoloCentric chromosome binding Protein [Caenorhabditis elegans]
novel_mir2	NM_001307143.1	-33.9	0.198997	-31.06	156	kcc-1	GO:0016021,GO:0015379,GO:0022820,GO:1902476,GO:0007268,GO:0071805,GO:0040011,GO:0009792,	K14427|1|0.0|2135|cel:CELE_R13A1.2|solute carrier family 12 (potassium/chloride transporter), member 4/5/6	gi|808357088|ref|NP_001294072.1|	0	K+/Cl-Cotransporter [Caenorhabditis elegans]
novel_mir2	NM_001027584.3	-33.7	0.087032	-30.9	158	nex-2	GO:0005545,GO:0008201,GO:0008429,GO:0005509,GO:0001786,GO:0043395,GO:0005544,GO:0009792,GO:0043652,GO:0007052,	K17095|1|0.0|1005|cel:CELE_T07C4.9|annexin A7/11	gi|71990586|ref|NP_001022755.1|	0	Annexin [Caenorhabditis elegans]
novel_mir2	NM_077023.4	-28.5	0.698406	-26.75	159	sulp-3	GO:0005887,GO:0008271,GO:0015106,GO:0019531,GO:0005254,GO:0015301,GO:1902358,GO:0015701,GO:1902476,GO:0042391,GO:0019532,GO:0051453,	K14453|1|0.0|1617|cel:CELE_F41D9.5|solute carrier family 26, other	gi|86564876|ref|NP_509424.2|	0	Sulfate permease family protein 3 [Caenorhabditis elegans]
novel_mir2	NM_062469.4	-35.4	0.032394	-31.43	168	C33F10.12	GO:0016021,GO:0003735,GO:0055085,GO:0008340,GO:0006412,	K15102|1|0.0|803|cel:CELE_C33F10.12|solute carrier family 25 (mitochondrial phosphate transporter), member 3	gi|17532293|ref|NP_494870.1|	0	Uncharacterized protein CELE_C33F10.12 [Caenorhabditis elegans]
novel_mir2	NM_001307057.1	-33.7	0.148577	-32.64	161	miz-1	GO:0002119,	-	gi|808356916|ref|NP_001293986.1|	0	MIZ-type zinc finger putative transcription factor [Caenorhabditis elegans]
novel_mir2	NM_001129698.2	-32.4	0.26096	-30.29	157	abts-4	GO:0016323,GO:0005887,GO:0005452,GO:1902476,GO:0051453,	K13856|1|1.30e-98|334|lgi:LOTGIDRAFT_137764|solute carrier family 4 (anion exchanger), member 3!K13855|2|6.99e-95|328|cmk:103190096|solute carrier family 4 (anion exchanger), member 2	gi|193210700|ref|NP_001123170.1|	0	Anion/Bicarbonate TranSporter family [Caenorhabditis elegans]
novel_mir2	NM_001307072.1	-29.9	0.546492	-27.83	165	tag-273	GO:0008270,GO:0000003,	-	gi|808356946|ref|NP_001294001.1|	0	Uncharacterized protein CELE_Y57G11A.1 [Caenorhabditis elegans]
novel_mir2	NM_001025782.2	-29.9	0.435329	-48.09	310	vps-34	GO:0005942,GO:0001891,GO:0005640,GO:0005737,GO:0005730,GO:0042995,GO:0016303,GO:0005524,GO:0061365,GO:0050708,GO:0008340,GO:0036092,GO:0000003,GO:0040007,GO:0042395,GO:0040011,GO:0006998,GO:0048015,GO:0002119,GO:0006914,GO:0090386,GO:1901076,GO:0046854,	-	gi|71980401|ref|NP_001020953.1|	0	Phosphatidylinositol 3-kinase [Caenorhabditis elegans]
novel_mir2	NM_001129574.2	-32.4	0.339676	-30.42	159	Y43F8B.3	GO:0004867,GO:0010951,	K03909|1|1.09e-25|114|asn:102388104|tissue factor pathway inhibitor	gi|392923002|ref|NP_001123046.2|	0	Uncharacterized protein CELE_Y43F8B.3 [Caenorhabditis elegans]
novel_mir2	NM_001268444.1	-31.2	0.60317	-26.19	164	wnk-1	GO:0005829,GO:0005515,GO:0004674,GO:0005524,GO:0000122,GO:0007275,GO:0018991,GO:0032414,GO:2000021,GO:0006468,GO:0061404,GO:0050891,GO:0035556,	K08867|1|0.0|3021|cel:CELE_C46C2.1|WNK lysine deficient protein kinase [EC:2.7.11.1]	gi|392899975|ref|NP_001255373.1|	0	Serine/threonine-protein kinase WNK [Caenorhabditis elegans]
novel_mir2	NM_001267406.1	-33.1	0.3355	-29.81	158	pqn-87	-	K14454|1|1.10e-41|173|tsp:Tsp_11254|aspartate aminotransferase, cytoplasmic [EC:2.6.1.1]!K11838|2|2.04e-33|146|bmor:101739310|ubiquitin carboxyl-terminal hydrolase 7 [EC:3.4.19.12]	gi|392892015|ref|NP_001254335.1|	0	Prion-like-(Q/N-rich)-domain-bearing protein [Caenorhabditis elegans]
novel_mir2	NM_059365.4	-34.7	0.069561	-28.38	161	trak-1	-	K15369|1|0.0|1169|cel:CELE_T27A3.1|trafficking kinesin-binding protein 1	gi|25144252|ref|NP_740861.1|	0	TRAK1 and TRAK2 related [Caenorhabditis elegans]
novel_mir2	NM_076428.3	-35.4	0.036466	-33.49	159	tsp-14	GO:0005887,GO:0045747,	K17346|1|6.65e-37|140|lgi:LOTGIDRAFT_235927|tetraspanin-33!K17345|3|1.21e-34|137|spu:583480|tetraspanin-5	gi|17567545|ref|NP_508829.1|	0	Tetraspanin [Caenorhabditis elegans]
novel_mir2	NM_001307564.1	-29.1	0.507789	-33.21	148	Y77E11A.7	GO:0005515,GO:0009792,GO:0008340,GO:0040035,GO:0002119,GO:0040011,	-	gi|808357934|ref|NP_001294493.1|	0	Uncharacterized protein CELE_Y77E11A.7 [Caenorhabditis elegans]
novel_mir2	NM_069167.3	-30.2	0.201372	-28.67	174	C53D6.4	GO:0005623,GO:0045454,	K13984|1|2.58e-06|53.9|aqu:100633463|thioredoxin domain-containing protein 5	gi|392899904|ref|NP_501568.3|	0	Uncharacterized protein CELE_C53D6.4 [Caenorhabditis elegans]
novel_mir2	NM_066097.6	-28.2	0.701234	-27.45	148	brd-1	GO:0005737,GO:0031436,GO:0005694,GO:0016874,GO:0046872,GO:0005515,GO:0061630,GO:0016567,GO:0006281,	K10683|1|0.0|1456|cel:CELE_K04C2.4|BRCA1-associated RING domain protein 1	gi|392895388|ref|NP_498498.3|	0	BRCA1-associated RING domain protein 1 [Caenorhabditis elegans]
novel_mir2	NM_066908.4	-30.5	0.423328	-28.01	155	cul-1	GO:0005737,GO:0019005,GO:0031625,GO:0061630,GO:0008340,GO:0043066,GO:0031647,GO:0006898,GO:0045930,GO:0042787,GO:0010826,GO:0043518,GO:0051301,GO:0008406,GO:0008285,GO:0009792,GO:0008361,GO:0043065,GO:0042594,GO:0016477,GO:0040025,	K03347|1|0.0|1624|cel:CELE_D2045.6|cullin 1	gi|17552768|ref|NP_499309.1|	0	Cullin-1 [Caenorhabditis elegans]
novel_mir2	NM_001307566.1	-29.1	0.515988	-33.21	148	Y77E11A.7	GO:0005515,GO:0009792,GO:0008340,GO:0040035,GO:0002119,GO:0040011,	-	gi|808357938|ref|NP_001294495.1|	0	Uncharacterized protein CELE_Y77E11A.7 [Caenorhabditis elegans]
novel_mir2	NM_001083257.2	-36.8	0.027032	-35.02	174	Y38F2AR.12	GO:0016787,GO:0008152,	K01469|1|0.0|1033|cel:CELE_Y38F2AR.12|5-oxoprolinase (ATP-hydrolysing) [EC:3.5.2.9]	gi|133901902|ref|NP_001076726.1|	0	Uncharacterized protein CELE_Y38F2AR.12 [Caenorhabditis elegans]
novel_mir2	NM_001269945.1	-32.4	0.445956	-30.42	159	Y43F8B.3	GO:0004867,GO:0010951,	K03909|1|1.51e-25|114|asn:102388104|tissue factor pathway inhibitor	gi|392923008|ref|NP_001256874.1|	0	Uncharacterized protein CELE_Y43F8B.3 [Caenorhabditis elegans]
novel_mir2	NM_062067.2	-39	0.032277	-35.28	167	gcy-15	GO:0016021,GO:0008074,GO:0005886,GO:0004383,GO:0004672,GO:0004016,GO:0005524,GO:0005525,GO:0006468,GO:0035556,GO:0006182,	K01769|1|0.0|2317|cel:CELE_ZC239.7|guanylate cyclase, other [EC:4.6.1.2]!K12323|4|5.40e-179|560|phu:Phum_PHUM100000|atrial natriuretic peptide receptor A [EC:4.6.1.2]	gi|212645647|ref|NP_494468.2|	0	Receptor-type guanylate cyclase gcy-15 [Caenorhabditis elegans]
novel_mir2	NM_001047668.3	-28.2	0.704862	-29.31	145	ric-7	GO:0005739,GO:0098793,GO:0071688,GO:1990504,GO:0061544,GO:0051646,	-	gi|115533222|ref|NP_001041133.1|	0	Uncharacterized protein CELE_F58E10.1 [Caenorhabditis elegans]
novel_mir2	NM_001029499.2	-31.9	0.165277	-25.44	158	kin-20	GO:0005737,GO:0005634,GO:0004674,GO:0005524,GO:0018105,GO:0008360,GO:0000003,GO:0048511,GO:0010171,GO:0016055,GO:0002119,GO:0040011,GO:0006897,GO:0009792,GO:0040018,	K08959|1|0.0|527|bmy:Bm1_37175|casein kinase 1, delta [EC:2.7.11.1]!K08960|2|0.0|520|loa:LOAG_05803|casein kinase 1, epsilon [EC:2.7.11.1]	gi|71990390|ref|NP_001024670.1|	0	Casein kinase I isoform delta [Caenorhabditis elegans]
novel_mir2	NM_062304.4	-30.5	0.057608	-26.39	155	Y14H12A.1	GO:0016021,GO:0045087,	-	gi|17536905|ref|NP_494705.1|	2.35205e-92	Uncharacterized protein CELE_Y14H12A.1 [Caenorhabditis elegans]
novel_mir2	NM_001307569.1	-29.1	0.506514	-33.21	148	Y77E11A.7	GO:0005515,GO:0009792,GO:0008340,GO:0040035,GO:0002119,GO:0040011,	-	gi|808357944|ref|NP_001294498.1|	0	Uncharacterized protein CELE_Y77E11A.7 [Caenorhabditis elegans]
novel_mir2	NM_171867.4	-28.3	0.725282	-55.87	316	mdt-15	GO:0016592,GO:0001104,GO:0003676,GO:0003713,GO:0035257,GO:0045893,GO:0008340,GO:0006357,GO:0030730,GO:0006898,GO:0040011,GO:0006915,GO:0009792,GO:0042594,GO:0002119,GO:0048477,GO:0019217,GO:0000398,GO:0040014,GO:0035188,	-	gi|25148756|ref|NP_741152.1|	0	Mediator of RNA polymerase II transcription subunit 15 [Caenorhabditis elegans]
novel_mir2	NM_074556.1	-29.5	0.227147	-26.21	162	srbc-54	GO:0016021,	-	gi|17561376|ref|NP_506957.1|	0	Serpentine Receptor, class BC (class B-like) [Caenorhabditis elegans]
novel_mir2	NM_171959.4	-31.1	0.742836	-28.88	158	F48E3.8	GO:0005783,GO:0016810,GO:0005975,	K20879|1|1.07e-20|106|cbr:CBG05211|NIMA (never in mitosis gene a)-related kinase 10 [EC:2.7.11.1]	gi|193210221|ref|NP_741840.2|	0	Uncharacterized protein CELE_F48E3.8 [Caenorhabditis elegans]
novel_mir2	NM_001347271.1	-28.9	0.2623	-50.38	292	grl-23	-	-	gi|392921181|ref|NP_001256430.1|	4.16382e-160	GRound-Like (grd related) [Caenorhabditis elegans]
novel_mir2	NM_068434.2	-31	0.15101	-26.49	155	srsx-14	GO:0016021,GO:0004930,GO:0007186,	-	gi|71984307|ref|NP_500835.2|	0	Serpentine Receptor, class SX [Caenorhabditis elegans]
novel_mir2	NM_066760.5	-34.7	0.268997	-33.45	160	cbp-1	GO:0005634,GO:0003712,GO:0008270,GO:0004402,GO:0006355,GO:0016573,	K04498|1|0.0|4158|cel:CELE_R10E11.1|E1A/CREB-binding protein [EC:2.3.1.48]	gi|392896225|ref|NP_499161.2|	0	Protein cbp-1 [Caenorhabditis elegans]
novel_mir2	NM_064059.2	-36.3	0.018064	-35.98	174	srh-44	GO:0016021,	K08473|1|0.0|692|cel:CELE_B0334.7|nematode chemoreceptor	gi|71980711|ref|NP_496460.2|	0	Serpentine Receptor, class H [Caenorhabditis elegans]
novel_mir2	NM_001267905.1	-27.7	0.435291	-26.31	154	orai-1	GO:0016324,GO:0005891,GO:0016323,GO:0015279,GO:0070588,GO:0006915,GO:0045087,GO:0030728,GO:0002115,	K16056|1|0.0|507|cbr:CBG15255|calcium release-activated calcium channel protein 1	gi|392893976|ref|NP_001254834.1|	0	Protein orai [Caenorhabditis elegans]
novel_mir2	NM_001269655.2	-28.8	0.262296	-28.2	155	gnrr-2	GO:0005887,GO:0008528,GO:0009792,GO:0007200,GO:0007218,	K04280|1|2.10e-17|85.9|bmor:100174939|gonadotropin-releasing hormone receptor!K04226|3|1.13e-14|77.8|bta:538439|arginine vasopressin receptor 1A	gi|808358612|ref|NP_001256584.2|	0	human GoNadotropin-Releasing hormone Receptor (GnRHR) related [Caenorhabditis elegans]
novel_mir2	NM_065166.4	-31.1	0.127891	-48.55	310	Y54F10AL.1	GO:0016021,	-	gi|17556152|ref|NP_497567.1|	0	Uncharacterized protein CELE_Y54F10AL.1 [Caenorhabditis elegans]
novel_mir2	NM_001047171.3	-27.2	0.506865	-27.04	155	pals-11	GO:0040025,GO:0051301,	-	gi|115532244|ref|NP_001040636.1|	0	Uncharacterized protein CELE_C17H1.13 [Caenorhabditis elegans]
novel_mir2	NM_001267934.1	-27.5	0.465902	-49.2	303	H06I04.6	-	-	gi|392894377|ref|NP_001254863.1|	0	Uncharacterized protein CELE_H06I04.6 [Caenorhabditis elegans]
novel_mir2	NM_001026265.2	-33.1	0.205703	-29.97	149	maph-1.1	GO:0009792,GO:0030163,GO:0019915,GO:0008406,	K10429|1|2.74e-12|76.6|chx:102176074|microtubule-associated protein 1	gi|71985143|ref|NP_001021436.1|	0	Microtubule-Associated Protein Homolog [Caenorhabditis elegans]
novel_mir2	NM_001267452.1	-34.4	0.129033	-34.61	160	Y48C3A.14	GO:0003917,GO:0003677,GO:0006265,	K03165|1|0.0|1824|cel:CELE_Y48C3A.14|DNA topoisomerase III [EC:5.99.1.2]	gi|392892249|ref|NP_001254381.1|	0	DNA topoisomerase [Caenorhabditis elegans]
novel_mir2	NM_001307570.1	-29.1	0.509061	-33.21	148	Y77E11A.7	GO:0005515,GO:0009792,GO:0008340,GO:0040035,GO:0002119,GO:0040011,	-	gi|808357946|ref|NP_001294499.1|	0	Uncharacterized protein CELE_Y77E11A.7 [Caenorhabditis elegans]
novel_mir2	NM_001083256.2	-36.8	0.082985	-35.02	174	Y38F2AR.12	GO:0016787,GO:0008152,	K01469|1|0.0|2590|cel:CELE_Y38F2AR.12|5-oxoprolinase (ATP-hydrolysing) [EC:3.5.2.9]	gi|808355898|ref|NP_001076725.2|	0	Uncharacterized protein CELE_Y38F2AR.12 [Caenorhabditis elegans]
novel_mir2	NM_078145.3	-30.5	0.490573	-53.66	311	pqn-36	-	-	gi|17567549|ref|NP_510546.1|	0	Prion-like-(Q/N-rich)-domain-bearing protein [Caenorhabditis elegans]
novel_mir2	NM_001268442.1	-31.2	0.60296	-26.19	164	wnk-1	GO:0005829,GO:0005515,GO:0004674,GO:0005524,GO:0000122,GO:0007275,GO:0018991,GO:0032414,GO:2000021,GO:0006468,GO:0061404,GO:0050891,GO:0035556,	K08867|1|0.0|3016|cel:CELE_C46C2.1|WNK lysine deficient protein kinase [EC:2.7.11.1]	gi|392899971|ref|NP_001255371.1|	0	Serine/threonine-protein kinase WNK [Caenorhabditis elegans]
novel_mir2	NR_068883.1	-28.4	0.059047	-27.8	155	F13H6.18	-	-	-	-	-
novel_mir2	NR_070965.1	-26.5	0.328212	-25.85	151	K05B2.6	-	-	-	-	-
novel_mir2	NM_067680.2	-39	0.014894	-37.27	175	clp-6	-	K08585|1|0.0|1317|cel:CELE_Y77E11A.10|calpain, invertebrate [EC:3.4.22.-]	gi|808355878|ref|NP_500081.2|	0	CaLPain family [Caenorhabditis elegans]
novel_mir2	NM_059025.4	-34.2	0.424354	-35.92	165	chd-7	GO:0005634,GO:0004386,GO:0005524,GO:0008152,	K14437|1|0.0|6147|cel:CELE_T04D1.4|chromodomain-helicase-DNA-binding protein 7 [EC:3.6.4.12]	gi|193203140|ref|NP_491426.2|	0	Chromodomain and Helicase Domain protein [Caenorhabditis elegans]
novel_mir2	NM_001307328.1	-31.5	0.084134	-26.41	165	Y54G2A.16	GO:0016021,	-	gi|808357462|ref|NP_001294257.1|	1.36885e-175	Uncharacterized protein CELE_Y54G2A.16 [Caenorhabditis elegans]
novel_mir2	NM_001027796.3	-28.5	0.524767	-61.05	328	uaf-1	GO:0071004,GO:0016607,GO:0089701,GO:0000243,GO:0005515,GO:0000166,GO:0030628,GO:0008187,GO:0008340,GO:0042127,GO:0048589,GO:0000381,GO:0040020,GO:0000389,GO:0009792,GO:0002119,GO:0007281,GO:0040022,GO:0010172,GO:0040035,	K12837|1|0.0|969|cel:CELE_Y92C3B.2|splicing factor U2AF 65 kDa subunit	gi|71996475|ref|NP_001022967.1|	0	Splicing factor U2AF 65 kDa subunit [Caenorhabditis elegans]
novel_mir2	NM_001268877.1	-34.1	0.056686	-29.58	170	ssu-2	-	-	gi|392901798|ref|NP_001255806.1|	0	Suppressor of Stomatin mutant Uncoordination [Caenorhabditis elegans]
novel_mir2	NM_001306420.1	-31.5	0.194904	-27.41	167	iglr-3	GO:0016021,	K16358|1|3.76e-13|77.4|gja:107123904|leucine-rich repeat and fibronectin type-III domain-containing protein 5!K20230|2|4.66e-13|77.0|hst:105182952|kekkon-1	gi|808354901|ref|NP_001293349.1|	0	IG(immunoglobulin) and LRR(Leucine Rich Repeat) domains [Caenorhabditis elegans]
novel_mir2	NM_001268194.1	-30.3	0.467763	-57.94	309	T28D6.5	GO:0016021,GO:0009792,GO:0040007,GO:0040035,GO:0002119,	-	gi|392896717|ref|NP_001255123.1|	0	Uncharacterized protein CELE_T28D6.5 [Caenorhabditis elegans]
novel_mir2	NM_001306255.1	-29.9	0.472154	-28.65	157	haf-4	GO:0016021,GO:0005765,GO:0042626,GO:0005524,GO:0015197,GO:0055085,GO:0006629,GO:0007041,GO:0035264,GO:0015833,GO:0009792,GO:0016246,	K05656|1|0.0|1497|cel:CELE_W04C9.1|ATP-binding cassette, subfamily B (MDR/TAP), member 9	gi|808354571|ref|NP_001293184.1|	0	HAlF transporter (PGP related) [Caenorhabditis elegans]
novel_mir2	NM_170825.3	-28.5	0.589451	-29.45	165	dot-1.1	GO:0005634,GO:0031151,GO:0051726,GO:0034729,	K11427|1|0.0|1092|cel:CELE_Y39G10AR.18|histone-lysine N-methyltransferase, H3 lysine-79 specific [EC:2.1.1.43]	gi|71994302|ref|NP_740809.2|	0	DOT1 histone methyltransferase family [Caenorhabditis elegans]
novel_mir2	NM_063701.3	-28.1	0.787566	-26.75	153	nos-3	GO:0005737,GO:0005515,GO:0040022,GO:0045836,	-	gi|17537419|ref|NP_496102.1|	0	NanOS related [Caenorhabditis elegans]
novel_mir2	NM_001347273.1	-28.9	0.347646	-50.38	292	grl-23	-	-	gi|392921183|ref|NP_001256431.1|	0	GRound-Like (grd related) [Caenorhabditis elegans]
novel_mir2	NM_058927.1	-31.9	0.117149	-30.79	159	hop-1	GO:0005887,GO:0000139,GO:0005789,GO:0043025,GO:0030018,GO:0048471,GO:0005634,GO:0016324,GO:0005938,GO:0004190,GO:0018991,GO:0043066,GO:0006816,GO:0042659,GO:0008406,GO:0045747,GO:0006509,GO:0008284,GO:0016485,GO:0007220,GO:0009792,GO:0050435,GO:0040028,GO:0042987,	K06060|1|0.0|729|cel:CELE_C18E3.8|presenilin, other!K04505|3|4.62e-57|196|tca:662627|presenilin 1 [EC:3.4.23.-]	gi|17507977|ref|NP_491328.1|	0	Presenilin hop-1 [Caenorhabditis elegans]
novel_mir2	NM_001306718.1	-28.9	0.390203	-29.29	157	ckr-2	GO:0016021,GO:0042923,GO:0004983,GO:0008340,GO:0007218,	K04196|1|9.09e-158|461|cbr:CBG15122|cholecystokinin-like receptor	gi|808355726|ref|NP_001293647.1|	0	CholecystoKinin Receptor homolog [Caenorhabditis elegans]
novel_mir2	NM_075468.4	-29.8	0.548753	-33.54	150	unc-51	GO:0043025,GO:0030424,GO:0005515,GO:0004674,GO:0005524,GO:0007411,GO:0008340,GO:0012501,GO:0070265,GO:0046777,GO:0009792,GO:0032880,GO:0045138,GO:0030163,GO:0006914,GO:0043277,GO:0040024,GO:0030516,GO:0040014,GO:0016477,	K08269|1|0.0|1771|cel:CELE_Y60A3A.1|serine/threonine-protein kinase ULK/ATG1 [EC:2.7.11.1]	gi|17564910|ref|NP_507869.1|	0	Serine/threonine-protein kinase unc-51 [Caenorhabditis elegans]
novel_mir2	NM_001038286.2	-28.9	0.551675	-29.29	157	ckr-2	GO:0016021,GO:0042923,GO:0004983,GO:0008340,GO:0007218,	K04196|1|0.0|1283|cel:CELE_Y39A3B.5|cholecystokinin-like receptor	gi|86563346|ref|NP_001033375.1|	0	CholecystoKinin Receptor homolog [Caenorhabditis elegans]
novel_mir2	NM_069367.4	-27.2	0.502729	-47.65	319	ssq-1	GO:0040011,	-	gi|17542094|ref|NP_501768.1|	2.0191e-166	Sperm-Specific family, class Q [Caenorhabditis elegans]
novel_mir2	NM_074494.5	-32.5	0.1146	-50.57	299	F53E4.1	GO:0000003,	K14966|1|5.55e-23|107|gja:107119918|host cell factor	gi|17561284|ref|NP_506895.1|	0	Uncharacterized protein CELE_F53E4.1 [Caenorhabditis elegans]
novel_mir2	NM_001307567.1	-29.1	0.499432	-33.21	148	Y77E11A.7	GO:0005515,GO:0009792,GO:0008340,GO:0040035,GO:0002119,GO:0040011,	-	gi|808357940|ref|NP_001294496.1|	0	Uncharacterized protein CELE_Y77E11A.7 [Caenorhabditis elegans]
novel_mir2	NM_001268876.1	-34.1	0.055754	-29.58	170	ssu-2	-	-	gi|392901796|ref|NP_001255805.1|	0	Suppressor of Stomatin mutant Uncoordination [Caenorhabditis elegans]
novel_mir2	NM_001029802.3	-33.3	0.239555	-29.48	165	mig-15	GO:0005737,GO:0004702,GO:0005524,GO:0018991,GO:0006898,GO:0030334,GO:0032228,GO:0040039,GO:0019915,GO:0048675,GO:0023014,GO:0033563,GO:0002119,GO:0010171,GO:0040035,	K08840|1|0.0|2212|cel:CELE_ZC504.4|TRAF2 and NCK interacting kinase [EC:2.7.11.1]	gi|72003662|ref|NP_001024973.1|	0	Serine/threonine-protein kinase mig-15 [Caenorhabditis elegans]
novel_mir2	NR_069914.1	-29.6	0.465358	-26.52	149	F35E12.9	-	-	-	-	-
novel_mir2	NM_059685.3	-35.2	0.028995	-34.65	173	col-35	GO:0016021,GO:0042302,	K06236|1|2.15e-12|73.6|shr:100924667|collagen, type I, alpha	gi|453226332|ref|NP_492086.3|	0	COLlagen [Caenorhabditis elegans]
novel_mir2	NR_132458.1	-31.3	0.241573	-32.09	166	clec-80	-	-	-	-	-
novel_mir2	NM_060342.6	-36.7	0.080134	-32.62	174	mus-101	-	K10728|1|0.0|2466|cel:CELE_F37D6.1|topoisomerase (DNA) II binding protein 1	gi|212642079|ref|NP_492743.3|	0	Uncharacterized protein CELE_F37D6.1 [Caenorhabditis elegans]
novel_mir2	NM_074055.3	-28.4	0.530418	-27.73	144	R10D12.1	GO:0016021,GO:0022857,GO:0055085,GO:0006820,	K08193|1|2.34e-49|181|ame:412220|MFS transporter, ACS family, solute carrier family 17 (sodium-dependent inorganic phosphate cotransporter), other!K12301|5|2.87e-39|153|api:100161085|MFS transporter, ACS family, solute carrier family 17 (sodium-dependent inorganic phosphate cotransporter), member 5	gi|17563054|ref|NP_506456.1|	0	Uncharacterized protein CELE_R10D12.1 [Caenorhabditis elegans]
novel_mir2	NM_001129232.2	-31	0.152452	-26.86	163	F56C9.6	-	-	gi|193209939|ref|NP_001122704.1|	0	Uncharacterized protein CELE_F56C9.6 [Caenorhabditis elegans]
novel_mir2	NM_059002.4	-30.6	0.493377	-51.36	304	nrd-1	GO:0003676,GO:0000166,GO:0009792,GO:0040027,	K13167|1|0.0|2003|cel:CELE_D1007.7|splicing factor, arginine/serine-rich 15!K13191|5|5.04e-30|134|dpe:Dper_GL10172|RNA-binding protein 16	gi|17506321|ref|NP_491403.1|	0	NRD (yeast Nuclear pre-mRNA Down-regulation) homolog [Caenorhabditis elegans]
novel_mir2	NM_001268404.1	-26.3	0.64548	-51.02	305	grsp-2	-	-	gi|392899802|ref|NP_001255333.1|	1.98013e-148	Glycine Rich Secreted Protein [Caenorhabditis elegans]
novel_mir2	NM_001029803.3	-33.3	0.234486	-29.48	165	mig-15	GO:0005737,GO:0004702,GO:0005524,GO:0018991,GO:0006898,GO:0030334,GO:0032228,GO:0040039,GO:0019915,GO:0048675,GO:0023014,GO:0033563,GO:0002119,GO:0010171,GO:0040035,	K08840|1|0.0|2228|cel:CELE_ZC504.4|TRAF2 and NCK interacting kinase [EC:2.7.11.1]	gi|72003664|ref|NP_001024974.1|	0	Serine/threonine-protein kinase mig-15 [Caenorhabditis elegans]
novel_mir2	NM_060009.2	-28.2	0.63264	-26.66	162	cutl-7	GO:0016021,	K04499|1|6.72e-50|191|tsp:Tsp_09265|RuvB-like protein 1 (pontin 52)!K14536|2|1.85e-17|92.0|tsp:Tsp_08007|ribosome assembly protein 1 [EC:3.6.5.-]	gi|212642118|ref|NP_492410.2|	0	CUTiclin-Like [Caenorhabditis elegans]
novel_mir2	NM_059544.4	-30	0.661103	-53.24	318	pqn-20	GO:0040018,GO:0007413,	-	gi|115533701|ref|NP_491945.2|	0	Prion-like-(Q/N-rich)-domain-bearing protein [Caenorhabditis elegans]
novel_mir2	NM_068990.4	-27.8	0.798893	-57.78	303	K07H8.10	GO:0003676,GO:0000166,GO:0009792,	K07H8.10;|1|0.0|1558|cel:CELE_K07H8.10|Uncharacterized protein!K11294|1|0.0|1558|cel:CELE_K07H8.10|nucleolin	gi|17541282|ref|NP_501391.1|	0	Uncharacterized protein CELE_K07H8.10 [Caenorhabditis elegans]
novel_mir2	NM_065569.3	-32.3	0.36859	-32.12	168	acy-1	GO:0016021,GO:0005622,GO:0005886,GO:0004016,GO:0006952,GO:0008219,GO:0006935,GO:0040013,GO:0007189,GO:0002119,GO:0040017,GO:0007193,GO:0019933,GO:0006171,GO:0072375,GO:0007614,GO:0030431,	K08049|1|0.0|2613|cel:CELE_F17C8.1|adenylate cyclase 9 [EC:4.6.1.1]	gi|17551720|ref|NP_497970.1|	0	Adenylyl CYclase [Caenorhabditis elegans]
novel_mir2	NM_001268438.1	-31.2	0.636082	-26.19	164	wnk-1	GO:0005829,GO:0005515,GO:0004674,GO:0005524,GO:0000122,GO:0007275,GO:0018991,GO:0032414,GO:2000021,GO:0006468,GO:0061404,GO:0050891,GO:0035556,	K08867|1|0.0|3743|cel:CELE_C46C2.1|WNK lysine deficient protein kinase [EC:2.7.11.1]	gi|392899963|ref|NP_001255367.1|	0	Serine/threonine-protein kinase WNK [Caenorhabditis elegans]
novel_mir2	NM_076261.4	-32.2	0.583429	-57.64	320	F35A5.1	GO:0005883,GO:0061564,	-	gi|453232791|ref|NP_508662.4|	0	Uncharacterized protein CELE_F35A5.1 [Caenorhabditis elegans]
novel_mir2	NM_065687.3	-32.6	0.109314	-29.99	157	tbx-2	GO:0016021,GO:0005667,GO:0005737,GO:0005634,GO:0019899,GO:0003677,GO:0003700,GO:0006357,GO:0032880,GO:0042048,GO:0043282,GO:0002119,GO:0040011,GO:0048666,GO:0042694,	K10176|1|0.0|880|cel:CELE_F21H11.3|T-box protein 2!K10177|3|5.19e-114|341|crg:105336245|T-box protein 3	gi|17555360|ref|NP_498088.1|	0	T-box protein 2 [Caenorhabditis elegans]
novel_mir2	NM_001270046.1	-28.4	0.627047	-25.72	151	ifc-2	GO:0005737,GO:0030057,GO:0005882,GO:0005198,GO:0010171,GO:0040018,GO:0018996,GO:0040002,GO:0040039,	K18585|1|0.0|1266|cel:CELE_M6.1|intermediate filament protein if	gi|392925207|ref|NP_001256975.1|	0	Intermediate Filament, C [Caenorhabditis elegans]
novel_mir2	NM_001129216.1	-30.1	0.418497	-28.86	159	unc-103	GO:0005887,GO:0005249,GO:0007617,GO:0046662,GO:0043050,GO:0071805,GO:0040011,GO:0006937,GO:0042391,GO:0030163,	K04905|1|0.0|1169|cel:CELE_C30D11.1|potassium voltage-gated channel Eag-related subfamily H member 2	gi|193205559|ref|NP_001122688.1|	0	Uncharacterized protein CELE_C30D11.1 [Caenorhabditis elegans]
novel_mir2	NM_001027255.1	-33.3	0.005163	-30.71	158	nspe-2	-	-	gi|71999128|ref|NP_001022426.1|	1.01357e-44	Nematode Specific Peptide family, group E [Caenorhabditis elegans]
novel_mir2	NM_066321.5	-28.9	0.54856	-53.63	320	gly-3	GO:0000139,GO:0016021,GO:0004653,GO:0046872,GO:0030246,GO:0018243,	K00710|1|0.0|1280|cel:CELE_ZK688.8|polypeptide N-acetylgalactosaminyltransferase [EC:2.4.1.41]	gi|17553814|ref|NP_498722.1|	0	Polypeptide N-acetylgalactosaminyltransferase 3 [Caenorhabditis elegans]
novel_mir2	NM_061545.6	-38.8	0.013813	-31.97	178	alh-6	GO:0003842,GO:0004029,GO:0006537,GO:0032502,GO:0000003,GO:0040011,GO:0006561,GO:0006898,GO:0055114,	K00294|1|0.0|1165|cel:CELE_F56D12.1|1-pyrroline-5-carboxylate dehydrogenase [EC:1.2.1.88]	gi|17534447|ref|NP_493946.1|	0	ALdehyde deHydrogenase [Caenorhabditis elegans]
novel_mir2	NM_001028772.2	-32.7	0.054716	-87.95	492	F47B8.13	-	-	gi|392921809|ref|NP_001023943.2|	7.74764e-154	Uncharacterized protein CELE_F47B8.13 [Caenorhabditis elegans]
novel_mir2	NM_001306243.1	-30.5	0.607522	-48.06	301	hgap-1	GO:0005096,GO:0051056,GO:0043547,GO:0008340,	K17700|1|1.34e-10|71.6|mde:101896864|RAP1 GTPase activating protein 1!K07207|2|1.90e-10|71.2|lgi:LOTGIDRAFT_61259|tuberous sclerosis 2	gi|808354547|ref|NP_001293172.1|	0	Heterodimeric GTPase Activating Protein subunit [Caenorhabditis elegans]
novel_mir2	NM_001306230.1	-31.9	0.035268	-28.02	165	dys-1	GO:0016014,GO:0005856,GO:0055120,GO:0042383,GO:0005277,GO:0008270,GO:0003779,GO:0045214,GO:0015870,GO:0046716,GO:0043056,GO:0040013,GO:0006836,GO:0007626,GO:0072488,GO:0040017,GO:0032224,	K10366|1|2.38e-11|65.5|shr:100921237|dystrophin	gi|808354521|ref|NP_001293159.1|	5.75879e-104	DYStrophin related [Caenorhabditis elegans]
novel_mir2	NM_064677.4	-27.4	0.270302	-28.99	145	gpx-2	GO:0005737,GO:0004602,GO:0098869,GO:0055114,GO:0006979,	K00432|1|1.44e-119|338|cel:CELE_R05H10.5|glutathione peroxidase [EC:1.11.1.9]	gi|808355450|ref|NP_001293547.1|	1.19742e-118	Glutathione peroxidase [Caenorhabditis elegans]
novel_mir2	NM_001026800.2	-28.5	0.517693	-43.81	292	C17G10.6	-	K14572|1|2.96e-07|58.9|phu:Phum_PHUM347380|midasin	gi|71982357|ref|NP_001021971.1|	0	Uncharacterized protein CELE_C17G10.6 [Caenorhabditis elegans]
novel_mir2	NM_182447.6	-31.9	0.10003	-25.44	158	kin-20	GO:0005737,GO:0005634,GO:0004674,GO:0005524,GO:0018105,GO:0008360,GO:0000003,GO:0048511,GO:0010171,GO:0016055,GO:0002119,GO:0040011,GO:0006897,GO:0009792,GO:0040018,	K08959|1|0.0|523|bmy:Bm1_37175|casein kinase 1, delta [EC:2.7.11.1]!K08960|3|0.0|516|tru:101068125|casein kinase 1, epsilon [EC:2.7.11.1]	gi|71990385|ref|NP_001024669.1|	0	Casein kinase I isoform delta [Caenorhabditis elegans]
novel_mir2	NM_182367.4	-26.9	0.775662	-27.8	145	mtm-9	GO:0005737,GO:0016020,GO:0019902,GO:0004438,GO:0030334,GO:0006907,	K18084|1|0.0|1060|cel:CELE_Y39H10A.3|myotubularin-related protein 9	gi|72001119|ref|NP_872167.2|	0	MTM (myotubularin) family [Caenorhabditis elegans]
novel_mir2	NM_061993.5	-29.4	0.274508	-26.38	157	sqv-2	GO:0016021,GO:0000139,GO:0047220,GO:0000910,GO:0018991,GO:0015012,GO:0040025,GO:0006486,GO:0040011,GO:0002009,GO:0009792,GO:0040018,GO:0030206,	K00734|1|0.0|692|cel:CELE_Y110A2AL.14|galactosylxylosylprotein 3-beta-galactosyltransferase [EC:2.4.1.134]	gi|17537731|ref|NP_494394.1|	0	Beta-1,3-galactosyltransferase sqv-2 [Caenorhabditis elegans]
novel_mir2	NM_001083303.3	-32.8	0.349938	-25.05	157	nhr-27	GO:0005634,GO:0008270,GO:0043565,GO:0003700,GO:0043401,GO:0006355,	K20225|1|0.0|881|cbr:CBG00068|capicua transcriptional repressor	gi|133901992|ref|NP_001076772.1|	0	GEX Interacting protein [Caenorhabditis elegans]
novel_mir2	NM_001129696.2	-31.5	0.407864	-30.34	159	odr-1	GO:0016021,GO:0005622,GO:0004383,GO:0004672,GO:0005524,GO:0006468,GO:0035556,GO:0006182,	K01769|1|1.29e-114|385|cel:CELE_T26C12.4|guanylate cyclase, other [EC:4.6.1.2]!K12323|3|1.82e-103|352|sko:100374109|atrial natriuretic peptide receptor A [EC:4.6.1.2]	gi|392927781|ref|NP_001123168.2|	0	Receptor-type guanylate cyclase gcy-10 [Caenorhabditis elegans]
novel_mir2	NM_076202.3	-30.9	0.371315	-31.43	148	C12D12.1	GO:0016020,	-	gi|17550358|ref|NP_508603.1|	0	Uncharacterized protein CELE_C12D12.1 [Caenorhabditis elegans]
novel_mir2	NM_001268188.1	-30.8	0.366903	-25.3	160	obr-1	GO:0006869,GO:0009792,	K20456|1|0.0|1543|cel:CELE_Y47D3A.17|oxysterol-binding protein 1!K20462|5|0.0|680|gja:107105980|oxysterol-binding protein 2	gi|17555950|ref|NP_499448.1|	0	Oxysterol-binding protein [Caenorhabditis elegans]
novel_mir2	NR_056136.1	-32.5	0.033368	-28.69	168	D2024.16	-	-	-	-	-
novel_mir2	NM_065908.3	-32.5	0.437999	-26.53	150	npp-10	GO:0031965,GO:0044614,GO:0043186,GO:0008139,GO:0005487,GO:0003723,GO:0017056,GO:0030719,GO:0051028,GO:0000973,GO:0034398,GO:0008406,GO:0040039,GO:0009792,GO:0002119,GO:0006997,GO:0006606,GO:0006405,	K14297|1|0.0|3471|cel:CELE_ZK328.5|nuclear pore complex protein Nup98-Nup96	gi|392895172|ref|NP_498309.3|	0	Nuclear pore complex protein Nup98 [Caenorhabditis elegans]
novel_mir2	NM_065874.4	-30.6	0.347504	-31.11	149	hpo-10	-	K16734|1|2.09e-10|67.8|cmk:103182040|SAC3 domain-containing protein 1	gi|17552900|ref|NP_498274.1|	0	Uncharacterized protein CELE_F01F1.1 [Caenorhabditis elegans]
novel_mir2	NM_171201.1	-26.5	0.253641	-52.18	304	clp-1	GO:0031430,GO:0004198,GO:0010940,GO:0006508,	K08585|1|5.15e-37|137|cel:CELE_C06G4.2|calpain, invertebrate [EC:3.4.22.-]	gi|25152689|ref|NP_741238.1|	5.36468e-70	Calpain clp-1 [Caenorhabditis elegans]
novel_mir2	NM_001306314.1	-31.9	0.751707	-51.98	317	dys-1	GO:0016014,GO:0005856,GO:0055120,GO:0042383,GO:0005277,GO:0008270,GO:0003779,GO:0045214,GO:0015870,GO:0046716,GO:0043056,GO:0040013,GO:0006836,GO:0007626,GO:0072488,GO:0040017,GO:0032224,	K10366|1|9.26e-174|578|gfr:102033021|dystrophin	gi|808354689|ref|NP_001293243.1|	0	DYStrophin related [Caenorhabditis elegans]
novel_mir2	NM_001267412.1	-30.9	0.357014	-27.71	160	sop-2	GO:0016607,GO:0031625,GO:0003723,GO:0042803,GO:0007411,GO:0016055,GO:0018991,GO:0040015,GO:0030334,GO:0042659,GO:0006915,GO:0040034,GO:0045892,GO:0002119,GO:0009952,GO:0048665,GO:0010607,GO:0040029,	-	gi|392892042|ref|NP_001254341.1|	0	Polycomb protein sop-2 [Caenorhabditis elegans]
novel_mir2	NM_077865.3	-31.5	0.391374	-30.34	159	odr-1	GO:0016021,GO:0005622,GO:0004383,GO:0004672,GO:0005524,GO:0006468,GO:0035556,GO:0006182,	K01769|1|8.71e-112|375|cel:CELE_T26C12.4|guanylate cyclase, other [EC:4.6.1.2]!K12323|3|7.75e-103|349|sko:100374109|atrial natriuretic peptide receptor A [EC:4.6.1.2]	gi|71994363|ref|NP_510266.3|	0	Receptor-type guanylate cyclase gcy-10 [Caenorhabditis elegans]
novel_mir2	NM_001306719.1	-28.9	0.444249	-29.29	157	ckr-2	GO:0016021,GO:0042923,GO:0004983,GO:0008340,GO:0007218,	K04196|1|4.96e-171|498|cel:CELE_Y39A3B.5|cholecystokinin-like receptor	gi|808355728|ref|NP_001293648.1|	0	CholecystoKinin Receptor homolog [Caenorhabditis elegans]
novel_mir2	NM_068318.5	-30.7	0.363044	-27.99	153	C02B10.5	GO:0009792,GO:0000003,GO:0010171,	-	gi|17538404|ref|NP_500719.1|	0	Uncharacterized protein CELE_C02B10.5 [Caenorhabditis elegans]
novel_mir2	NM_001313323.1	-32.4	0.162712	-29.16	157	gly-7	GO:0000139,GO:0016021,GO:0046872,GO:0016757,GO:0030246,GO:0006486,	K00710|1|0.0|1172|cel:CELE_Y46H3A.6|polypeptide N-acetylgalactosaminyltransferase [EC:2.4.1.41]	gi|17561826|ref|NP_503512.1|	0	Probable N-acetylgalactosaminyltransferase 7 [Caenorhabditis elegans]
novel_mir2	NM_076218.4	-29.8	0.16204	-28.94	160	C18B2.3	-	-	gi|17550540|ref|NP_508619.1|	1.78307e-172	Uncharacterized protein CELE_C18B2.3 [Caenorhabditis elegans]
novel_mir2	NM_001026638.2	-29.1	0.705963	-29.02	154	bam-2	GO:0005887,	-	gi|71996118|ref|NP_001021809.1|	0	Uncharacterized protein CELE_Y71F9AR.1 [Caenorhabditis elegans]
novel_mir2	NM_001313144.1	-33.6	0.189776	-30.02	162	egl-2	GO:0005622,GO:0005887,GO:0031528,GO:0005249,GO:0019901,GO:0000155,GO:0000160,GO:0007635,GO:0018991,GO:0023014,GO:0071805,GO:0042391,GO:0030163,GO:0006936,	K04908|1|0.0|1991|cel:CELE_F16B3.1|potassium voltage-gated channel Eag-related subfamily H member 5	gi|922581006|ref|NP_001300073.1|	0	Uncharacterized protein CELE_F16B3.1 [Caenorhabditis elegans]
novel_mir2	NM_063821.5	-29.6	0.308819	-28.25	153	M02G9.2	-	-	gi|193204754|ref|NP_496222.3|	0	Uncharacterized protein CELE_M02G9.2 [Caenorhabditis elegans]
novel_mir2	NM_068049.3	-27.3	0.755399	-26.17	157	clec-79	GO:0030246,	-	gi|17540466|ref|NP_500450.1|	0	C-type LECtin [Caenorhabditis elegans]
novel_mir2	NM_001269750.1	-32.5	0.038327	-30.08	153	F53E4.1	GO:0000003,	K20285|1|2.32e-08|57.8|gja:107119963|Rab9 effector protein with kelch motifs!K14966|2|6.59e-08|56.6|tru:101069163|host cell factor	gi|392922220|ref|NP_001256679.1|	2.89984e-140	Uncharacterized protein CELE_F53E4.1 [Caenorhabditis elegans]
novel_mir2	NM_067941.1	-29	0.32875	-29.52	167	C04C3.6	GO:0016021,GO:0004930,GO:0007186,	-	gi|17538428|ref|NP_500342.1|	0	Uncharacterized protein CELE_C04C3.6 [Caenorhabditis elegans]
novel_mir2	NM_063470.1	-26	0.275444	-25.93	158	F07H5.6	-	-	gi|17532943|ref|NP_495871.1|	5.8341e-51	Uncharacterized protein CELE_F07H5.6 [Caenorhabditis elegans]
novel_mir2	NM_073559.5	-29.8	0.633607	-27.5	156	daf-11	GO:0016021,GO:0008074,GO:0005886,GO:0043204,GO:0030425,GO:0005525,GO:0004672,GO:0004383,GO:0046872,GO:0005524,GO:0004016,GO:0001306,GO:0071321,GO:0007608,GO:0050920,GO:0008355,GO:0007168,GO:0042542,GO:0070781,GO:0043327,GO:0007602,GO:0030511,GO:0009266,GO:0008340,GO:0019236,GO:0009792,GO:0030516,GO:0006182,GO:0061067,GO:0035556,GO:0010628,GO:0009593,GO:0006355,GO:0006468,	K01769|1|1.16e-117|395|cel:CELE_C49H3.1|guanylate cyclase, other [EC:4.6.1.2]!K12323|4|2.24e-85|290|hro:HELRODRAFT_77609|atrial natriuretic peptide receptor A [EC:4.6.1.2]	gi|212646197|ref|NP_505960.3|	0	Receptor-type guanylate cyclase daf-11 [Caenorhabditis elegans]
novel_mir2	NM_062428.3	-26.4	0.573708	-40.06	174	T05A7.7	-	-	gi|17535987|ref|NP_494829.1|	2.64303e-180	Uncharacterized protein CELE_T05A7.7 [Caenorhabditis elegans]
novel_mir2	NM_077930.1	-30.2	0.258277	-29.21	174	irld-24	-	-	gi|17550734|ref|NP_510331.1|	0	Insulin/EGF-Receptor L Domain protein [Caenorhabditis elegans]
novel_mir2	NM_001267160.1	-29	0.346158	-57.12	304	gpa-11	GO:0005834,GO:0004871,GO:0046872,GO:0031683,GO:0003924,GO:0001664,GO:0005525,GO:0008340,GO:0007210,GO:0008152,GO:0007188,	K04640|1|0.0|665|cbr:CBG21947|guanine nucleotide-binding protein subunit alpha, other!K04630|2|9.85e-88|273|spu:414054|guanine nucleotide-binding protein G(i) subunit alpha!K04534|3|6.07e-87|271|hro:HELRODRAFT_95386|guanine nucleotide-binding protein G(o) subunit alpha!K19729|5|2.71e-86|269|asn:102384042|guanine nucleotide-binding protein G(t) subunit alpha 3	gi|392889730|ref|NP_001254088.1|	0	Guanine nucleotide-binding protein alpha-11 subunit [Caenorhabditis elegans]
novel_mir2	NM_073398.3	-28.7	0.788163	-25.56	145	F17C11.10	GO:0031298,GO:0003682,GO:0045132,GO:0006261,GO:0009792,	K11274|1|0.0|2279|cel:CELE_F17C11.10|chromosome transmission fidelity protein 4	gi|17559826|ref|NP_505799.1|	0	Uncharacterized protein CELE_F17C11.10 [Caenorhabditis elegans]
novel_mir2	NM_074012.4	-25.6	0.776888	-27.92	152	F53C11.3	GO:0016491,GO:0019915,GO:0045087,GO:0055114,GO:0050829,	K13236|1|0.0|643|cel:CELE_F53C11.3|2,4-dienoyl-CoA reductase, mitochondrial [EC:1.3.1.34]	gi|17561272|ref|NP_506413.1|	0	Uncharacterized oxidoreductase F53C11.3 [Caenorhabditis elegans]
novel_mir2	NM_171901.4	-28.9	0.459041	-25.39	155	Y69A2AR.1	-	-	gi|71999465|ref|NP_741345.2|	0	Uncharacterized protein CELE_Y69A2AR.1 [Caenorhabditis elegans]
novel_mir2	NM_001129215.1	-30.1	0.442753	-28.86	159	unc-103	GO:0005887,GO:0005249,GO:0007617,GO:0046662,GO:0043050,GO:0071805,GO:0040011,GO:0006937,GO:0042391,GO:0030163,	K04905|1|0.0|1169|cel:CELE_C30D11.1|potassium voltage-gated channel Eag-related subfamily H member 2	gi|193205557|ref|NP_001122687.1|	0	Uncharacterized protein CELE_C30D11.1 [Caenorhabditis elegans]
novel_mir2	NM_001269527.1	-28.4	0.745777	-25.14	161	ZC455.1	-	-	gi|392921270|ref|NP_001256456.1|	0	Uncharacterized protein CELE_ZC455.1 [Caenorhabditis elegans]
novel_mir2	NM_001028671.3	-27.6	0.634452	-25.97	152	ppm-1	GO:0030054,GO:0045202,GO:0030145,GO:0004722,GO:0000287,GO:0006470,	K04461|1|0.0|973|cel:CELE_F25D1.1|protein phosphatase 1B [EC:3.1.3.16]	gi|71991290|ref|NP_001023842.1|	0	Protein Phosphatase, Mg2+/Mn2+ dependent [Caenorhabditis elegans]
novel_mir2	NM_001267987.1	-30.5	0.400913	-27.36	148	cdk-12	GO:0005694,GO:0005634,GO:0008353,GO:0005524,GO:0004693,GO:0006468,GO:0051726,GO:0040035,GO:0010171,GO:0002119,GO:0040011,GO:0006898,GO:0009792,	K08819|1|0.0|1495|cel:CELE_B0285.1|cyclin-dependent kinase 12/13 [EC:2.7.11.22 2.7.11.23]	gi|392894694|ref|NP_001254916.1|	0	Cyclin-dependent kinase 12 [Caenorhabditis elegans]
novel_mir2	NM_001265527.1	-33.1	0.191499	-29.97	149	maph-1.1	GO:0009792,GO:0030163,GO:0019915,GO:0008406,	K10429|1|2.17e-12|77.0|chx:102176074|microtubule-associated protein 1	gi|392887888|ref|NP_001252456.1|	0	Microtubule-Associated Protein Homolog [Caenorhabditis elegans]
novel_mir2	NM_001129212.1	-30.1	0.510855	-28.86	159	unc-103	GO:0005887,GO:0005249,GO:0007617,GO:0046662,GO:0043050,GO:0071805,GO:0040011,GO:0006937,GO:0042391,GO:0030163,	K04905|1|0.0|1545|cel:CELE_C30D11.1|potassium voltage-gated channel Eag-related subfamily H member 2!K04910|4|0.0|792|crg:105328901|potassium voltage-gated channel Eag-related subfamily H member 7	gi|193205550|ref|NP_001122684.1|	0	Uncharacterized protein CELE_C30D11.1 [Caenorhabditis elegans]
novel_mir2	NM_065545.1	-27	0.798307	-25.25	153	clec-153	GO:0030246,	-	gi|17553034|ref|NP_497946.1|	0	C-type LECtin [Caenorhabditis elegans]
novel_mir2	NM_171579.4	-28.8	0.516263	-25.6	158	Y39B6A.25	-	K18405|1|2.68e-06|56.2|nve:NEMVE_v1g245679|tudor domain-containing protein 1/4/6/7	gi|193209021|ref|NP_741669.2|	0	Uncharacterized protein CELE_Y39B6A.25 [Caenorhabditis elegans]
novel_mir2	NM_001307171.1	-30.2	0.494542	-28.57	163	Y105C5A.15	GO:0005634,GO:0000977,GO:0003700,GO:0006357,	-	gi|808357144|ref|NP_001294100.1|	0	Uncharacterized protein CELE_Y105C5A.15 [Caenorhabditis elegans]
novel_mir2	NM_001269502.1	-28.9	0.377839	-73.97	453	grl-23	-	-	gi|392921183|ref|NP_001256431.1|	0	GRound-Like (grd related) [Caenorhabditis elegans]
novel_mir2	NM_001307106.1	-31.2	0.604429	-26.19	164	wnk-1	GO:0005829,GO:0005515,GO:0004674,GO:0005524,GO:0000122,GO:0007275,GO:0018991,GO:0032414,GO:2000021,GO:0006468,GO:0061404,GO:0050891,GO:0035556,	K08867|1|0.0|3021|cel:CELE_C46C2.1|WNK lysine deficient protein kinase [EC:2.7.11.1]	gi|808357014|ref|NP_001294035.1|	0	Serine/threonine-protein kinase WNK [Caenorhabditis elegans]
novel_mir2	NM_001322646.1	-27.9	0.061611	-26.55	143	trpp-11	-	K20308|1|1.42e-35|130|cel:CELE_B0412.3|trafficking protein particle complex subunit 11	gi|17551872|ref|NP_497264.1|	1.14875e-34	TRansport Protein Particle [Caenorhabditis elegans]
novel_mir2	NM_068060.3	-32.7	0.128135	-29.61	150	hlh-30	GO:0005737,GO:0005634,GO:0000981,GO:0046983,GO:0010506,GO:0050829,GO:0008340,GO:0045944,GO:0000003,GO:0019915,GO:0050830,	K09455|1|4.53e-29|123|dre:30080|microphthalmia-associated transcription factor!K09105|2|1.10e-28|123|ola:101166296|transcription factor E3	gi|17542748|ref|NP_500461.1|	0	Helix Loop Helix [Caenorhabditis elegans]
novel_mir2	NM_001026495.4	-29.9	0.504047	-28.65	157	haf-4	GO:0016021,GO:0005765,GO:0042626,GO:0005524,GO:0015197,GO:0055085,GO:0006629,GO:0007041,GO:0035264,GO:0015833,GO:0009792,GO:0016246,	K05656|1|0.0|1634|cel:CELE_W04C9.1|ATP-binding cassette, subfamily B (MDR/TAP), member 9	gi|71992290|ref|NP_001021666.1|	0	HAlF transporter (PGP related) [Caenorhabditis elegans]
novel_mir2	NM_059010.4	-27.4	0.598042	-53.39	294	C44E4.4	GO:0030529,GO:0005634,GO:0003723,GO:0000166,GO:0006396,GO:0018991,GO:0040027,GO:0006898,GO:0009792,GO:0008406,	K11090|1|0.0|804|cel:CELE_C44E4.4|lupus La protein	gi|17506023|ref|NP_491411.1|	0	Uncharacterized protein CELE_C44E4.4 [Caenorhabditis elegans]
novel_mir2	NM_001307329.1	-31.5	0.032645	-26.41	165	Y54G2A.16	GO:0016021,	-	gi|808357464|ref|NP_001294258.1|	2.55236e-85	Uncharacterized protein CELE_Y54G2A.16 [Caenorhabditis elegans]
novel_mir2	NR_102113.1	-28.8	0.011975	-35.71	147	linc-98	-	-	-	-	-
novel_mir2	NM_067311.3	-32.9	0.01921	-25.65	161	Y39E4B.13	-	-	gi|193210800|ref|NP_499712.2|	4.97062e-92	Uncharacterized protein CELE_Y39E4B.13 [Caenorhabditis elegans]
novel_mir2	NM_069566.4	-27.4	0.631913	-29.71	146	K08C7.1	GO:0016021,GO:0055085,	K12301|1|2.67e-20|98.2|tru:101074777|MFS transporter, ACS family, solute carrier family 17 (sodium-dependent inorganic phosphate cotransporter), member 5	gi|71991162|ref|NP_501967.2|	0	Uncharacterized protein CELE_K08C7.1 [Caenorhabditis elegans]
novel_mir2	NM_072603.1	-32.9	0.079373	-34.19	159	frpr-3	GO:0016021,GO:0004930,GO:0007186,	K04216|1|2.77e-15|81.6|lgi:LOTGIDRAFT_159904|nociceptin receptor!K04284|3|8.51e-13|73.9|obi:106868770|growth hormone secretagogue receptor!K08428|5|3.15e-11|68.6|lgi:LOTGIDRAFT_84528|G protein-coupled receptor 139	gi|17558266|ref|NP_505004.1|	0	FMRFamide Peptide Receptor family [Caenorhabditis elegans]
novel_mir2	NM_001348638.1	-26.2	0.770702	-67.5	445	fust-1	GO:0016021,GO:0003676,GO:0000166,GO:0008270,GO:0000003,	K14651|1|0.0|536|cel:CELE_C27H5.3|transcription initiation factor TFIID subunit 15!K13209|5|3.18e-14|79.3|pss:102460772|RNA-binding protein EWS	gi|17532119|ref|NP_495483.1|	0	FUS/TLS RNA binding protein homolog [Caenorhabditis elegans]
novel_mir2	NM_074308.4	-33.3	0.049167	-28.97	159	otub-1	GO:0005886,GO:0005634,GO:0004843,GO:0019784,GO:0043130,GO:0071108,	K09602|1|0.0|591|cel:CELE_C25D7.8|ubiquitin thioesterase protein OTUB1 [EC:3.4.19.12]	gi|17558202|ref|NP_506709.1|	0	Ubiquitin thioesterase otubain-like [Caenorhabditis elegans]
novel_mir2	NM_170872.3	-34.7	0.075876	-28.38	161	trak-1	-	K15369|1|0.0|1258|cel:CELE_T27A3.1|trafficking kinesin-binding protein 1	gi|25144252|ref|NP_740861.1|	0	TRAK1 and TRAK2 related [Caenorhabditis elegans]
novel_mir2	NM_071432.1	-25.8	0.770455	-25.44	151	str-244	GO:0005887,GO:0038022,GO:0050911,GO:0007186,GO:0042048,	K08473|1|0.0|673|cel:CELE_C50H11.9|nematode chemoreceptor	gi|17563644|ref|NP_503833.1|	0	Seven TM Receptor [Caenorhabditis elegans]
novel_mir2	NM_067170.5	-28.5	0.707544	-27.77	152	zyg-8	GO:0005737,GO:0005813,GO:0005876,GO:0000922,GO:0008017,GO:0004674,GO:0005524,GO:0007026,GO:0040011,GO:0007020,GO:0040001,GO:0009792,GO:0006468,GO:0010171,GO:0035556,	K08805|1|0.0|1672|cel:CELE_Y79H2A.11|doublecortin-like kinase 1/2 [EC:2.7.11.1]	gi|25144034|ref|NP_499571.2|	0	Serine/threonine-protein kinase zyg-8 [Caenorhabditis elegans]
novel_mir2	NM_076273.4	-28.7	0.261946	-28.52	166	sup-12	GO:0016607,GO:0030529,GO:0003727,GO:0097157,GO:0005515,GO:0000166,GO:0032956,GO:0000381,GO:0040012,	K14411|1|6.78e-16|77.4|adf:107352089|RNA-binding protein Musashi	gi|17569937|ref|NP_508674.1|	1.66015e-180	SUPpressor [Caenorhabditis elegans]
novel_mir2	NM_001268288.2	-30.7	0.641838	-26.87	166	frm-5.1	GO:0002119,GO:0040022,GO:0042127,GO:0040020,GO:0045132,GO:0008406,	K02374|1|1.38e-144|473|tsp:Tsp_03584|tyrosine-protein phosphatase non-receptor type 13	gi|808355817|ref|NP_001255217.2|	0	FERM domain (protein4.1-ezrin-radixin-moesin) family [Caenorhabditis elegans]
novel_mir2	NM_073900.1	-28.3	0.398252	-28.42	163	srh-18	GO:0016021,GO:0050907,	K08473|1|0.0|671|cel:CELE_C50B6.5|nematode chemoreceptor	gi|17558724|ref|NP_506301.1|	0	Serpentine Receptor, class H [Caenorhabditis elegans]
novel_mir2	NM_001129056.3	-36	0.09687	-35.17	178	catp-1	GO:0043231,GO:0005887,GO:0046872,GO:0019829,GO:0005524,GO:0098655,GO:0040024,GO:0008152,	K01539|1|0.0|2344|cel:CELE_Y105E8A.12|sodium/potassium-transporting ATPase subunit alpha [EC:3.6.3.9]	gi|193203354|ref|NP_001122528.1|	0	Cation transporting ATPase [Caenorhabditis elegans]
novel_mir2	NM_001307553.1	-28.2	0.089509	-25.04	146	C09E9.1	-	K09850|1|3.52e-09|56.2|gfr:102044736|Ras association domain-containing protein 1	gi|808357912|ref|NP_001294482.1|	6.75026e-62	Uncharacterized protein CELE_C09E9.1 [Caenorhabditis elegans]
novel_mir2	NM_067057.4	-30.3	0.419613	-57.94	309	T28D6.5	GO:0016021,GO:0009792,GO:0040007,GO:0040035,GO:0002119,	-	gi|392896723|ref|NP_499458.3|	0	Uncharacterized protein CELE_T28D6.5 [Caenorhabditis elegans]
novel_mir2	NM_073096.3	-27.5	0.441534	-25.16	150	ztf-9	-	-	gi|17566856|ref|NP_505497.1|	0	Zinc finger putative Transcription Factor family [Caenorhabditis elegans]
novel_mir2	NM_001307333.1	-31.5	0.149644	-29.63	156	ser-6	GO:0016021,GO:0004989,GO:1904122,	K04165|1|6.09e-68|226|isc:IscW_ISCW003835|Octopamine receptor!K04140|2|4.83e-51|181|sko:100373264|adrenergic receptor alpha-2C!K04153|3|5.16e-51|180|phu:Phum_PHUM238080|5-hydroxytryptamine receptor 1	gi|808357472|ref|NP_001294262.1|	0	SERotonin/octopamine receptor family [Caenorhabditis elegans]
novel_mir2	NM_001268439.1	-31.2	0.635703	-26.19	164	wnk-1	GO:0005829,GO:0005515,GO:0004674,GO:0005524,GO:0000122,GO:0007275,GO:0018991,GO:0032414,GO:2000021,GO:0006468,GO:0061404,GO:0050891,GO:0035556,	K08867|1|0.0|3529|cel:CELE_C46C2.1|WNK lysine deficient protein kinase [EC:2.7.11.1]	gi|392899965|ref|NP_001255368.1|	0	Serine/threonine-protein kinase WNK [Caenorhabditis elegans]
novel_mir2	NM_068061.3	-32.7	0.127834	-29.61	150	hlh-30	GO:0005737,GO:0005634,GO:0000981,GO:0046983,GO:0010506,GO:0050829,GO:0008340,GO:0045944,GO:0000003,GO:0019915,GO:0050830,	K09455|1|8.53e-29|122|dre:30080|microphthalmia-associated transcription factor!K09105|2|8.88e-29|123|ola:101166296|transcription factor E3	gi|17542746|ref|NP_500462.1|	0	Helix Loop Helix [Caenorhabditis elegans]
novel_mir2	NM_001307343.1	-27.9	0.259951	-26.41	149	K11H12.8	GO:0016021,	K06890|1|6.07e-07|53.5|api:100165572|uncharacterized protein	gi|808357492|ref|NP_001294272.1|	3.57734e-134	Uncharacterized protein CELE_K11H12.8 [Caenorhabditis elegans]
novel_mir2	NM_060546.6	-31.9	0.079581	-28.02	165	dys-1	GO:0016014,GO:0005856,GO:0055120,GO:0042383,GO:0005277,GO:0008270,GO:0003779,GO:0045214,GO:0015870,GO:0046716,GO:0043056,GO:0040013,GO:0006836,GO:0007626,GO:0072488,GO:0040017,GO:0032224,	K10366|1|9.12e-13|73.2|shr:100921237|dystrophin	gi|7500308|pir||T21636	0	hypothetical protein F32B4.3a - Caenorhabditis elegans
novel_mir2	NM_064823.6	-30.2	0.283184	-25.82	144	fem-2	GO:0016021,GO:0046872,GO:0033192,GO:0005515,GO:0045138,GO:0043280,GO:0035970,GO:0042006,GO:0030238,GO:0009792,	K17501|1|0.0|931|cel:CELE_T19C3.8|protein phosphatase 1E [EC:3.1.3.16]	gi|17553792|ref|NP_497224.1|	0	Ca(2+)/calmodulin-dependent protein kinase phosphatase [Caenorhabditis elegans]
novel_mir2	NM_067862.2	-31.5	0.049922	-26.41	165	Y54G2A.16	GO:0016021,	-	gi|808357462|ref|NP_001294257.1|	1.1644e-115	Uncharacterized protein CELE_Y54G2A.16 [Caenorhabditis elegans]
novel_mir2	NM_066249.3	-35.1	0.101266	-34.43	170	clk-2	GO:0000781,GO:0005737,GO:0005634,GO:0003677,GO:0009411,GO:0008340,GO:0010165,GO:0000723,GO:0000003,GO:0000077,GO:0009792,	K11137|1|0.0|1833|cel:CELE_C07H6.6|telomere length regulation protein	gi|25150725|ref|NP_498650.2|	0	Telomere length regulation protein clk-2 [Caenorhabditis elegans]
novel_mir2	NM_069411.1	-29.3	0.248379	-26.45	162	F44D12.6	GO:0016021,	-	gi|17540430|ref|NP_501812.1|	0	Uncharacterized protein CELE_F44D12.6 [Caenorhabditis elegans]
novel_mir2	NM_071748.1	-30.8	0.112837	-26.85	162	T05B4.12	-	-	gi|17563870|ref|NP_504149.1|	1.21876e-172	Uncharacterized protein CELE_T05B4.12 [Caenorhabditis elegans]
novel_mir2	NM_001264435.1	-29.9	0.480592	-31.96	156	hpo-35	-	-	gi|392886975|ref|NP_001251364.1|	0	Uncharacterized protein CELE_F45H11.3 [Caenorhabditis elegans]
novel_mir2	NM_182162.4	-28.4	0.097797	-29.55	146	K07D4.9	-	-	gi|32564274|ref|NP_871962.1|	6.95297e-69	Uncharacterized protein CELE_K07D4.9 [Caenorhabditis elegans]
novel_mir2	NM_001028345.4	-28.5	0.597299	-27.69	156	tag-273	GO:0008270,GO:0000003,	-	gi|71999280|ref|NP_001023516.1|	0	Uncharacterized protein CELE_Y57G11A.1 [Caenorhabditis elegans]
novel_mir2	NM_066066.5	-33.3	0.208819	-33.95	158	rbf-1	GO:0030054,GO:0008021,GO:0005886,GO:0017137,GO:0005509,GO:0005544,GO:0030276,GO:0019905,GO:0006906,GO:1990504,GO:0017158,GO:0040017,GO:0048791,GO:0006886,	K19917|1|0.0|1979|cel:CELE_F37A4.7|double C2-like domain-containing protein beta!K19938|5|7.16e-85|290|crg:105326480|rabphilin-3A	gi|71985465|ref|NP_001022568.1|	0	Rabphilin-1 [Caenorhabditis elegans]
novel_mir2	NM_001047533.3	-27.5	0.477669	-51.69	308	glct-6	GO:0016021,GO:0015018,GO:0030204,GO:0050650,GO:0005975,GO:0008340,	K10158|1|2.62e-52|179|cel:CELE_ZK1307.5|galactosylgalactosylxylosylprotein 3-beta-glucuronosyltransferase 3 [EC:2.4.1.135]	gi|922580550|ref|NP_001299964.1|	0	GLuCuronosylTransferase-like [Caenorhabditis elegans]
novel_mir2	NM_001306421.1	-31.5	0.134625	-27.41	167	iglr-3	-	K19511|1|2.27e-09|64.3|obi:106877351|peroxidase [EC:1.11.1.7]!K10168|2|6.57e-08|59.7|rno:289337|toll-like receptor 5!K16354|5|3.18e-07|57.4|dre:393587|leucine-rich repeat and fibronectin type-III domain-containing protein 1	gi|808354901|ref|NP_001293349.1|	0	IG(immunoglobulin) and LRR(Leucine Rich Repeat) domains [Caenorhabditis elegans]
novel_mir2	NM_076964.5	-28.7	0.654616	-27.78	157	K07E3.2	-	-	gi|193210547|ref|NP_509365.3|	0	Uncharacterized protein CELE_K07E3.2 [Caenorhabditis elegans]
novel_mir2	NM_001270087.1	-31.5	0.012233	-30.28	158	ZC449.8	-	-	gi|392925963|ref|NP_001257016.1|	9.97961e-45	Uncharacterized protein CELE_ZC449.8 [Caenorhabditis elegans]
novel_mir2	NM_001306450.1	-27.2	0.550037	-27.04	155	pals-11	GO:0040025,GO:0051301,	-	gi|808354961|ref|NP_001293379.1|	0	Uncharacterized protein CELE_C17H1.13 [Caenorhabditis elegans]
novel_mir2	NR_101799.1	-29.1	0.017354	-25.34	153	H06I04.14	-	-	-	-	-
novel_mir2	NM_071451.1	-32.6	0.156073	-29.94	163	sdz-34	GO:0008270,	K15712|1|2.34e-07|59.7|aqu:100639858|E3 ubiquitin-protein ligase TTC3 [EC:2.3.2.27]!K19041|4|2.74e-06|55.5|adf:107353847|E3 ubiquitin-protein ligase RNF38/44 [EC:2.3.2.27]	gi|17566240|ref|NP_503852.1|	0	SKN-1 Dependent Zygotic transcript [Caenorhabditis elegans]
novel_mir2	NM_001136466.2	-28.7	0.145772	-28.52	166	sup-12	GO:0016607,GO:0030529,GO:0003727,GO:0097157,GO:0005515,GO:0000166,GO:0032956,GO:0000381,GO:0040012,	K14411|1|1.12e-16|76.6|adf:107352089|RNA-binding protein Musashi	gi|212648574|ref|NP_001129938.1|	3.5807e-109	SUPpressor [Caenorhabditis elegans]
novel_mir2	NM_065761.4	-29.4	0.465697	-28.78	156	paa-1	GO:0072686,GO:0000159,GO:0005635,GO:0005813,GO:0043186,GO:0017151,GO:0016246,GO:0006898,GO:0006461,GO:0007052,GO:0051301,GO:0008406,GO:0006915,GO:0009792,GO:0002119,GO:0016477,GO:0032940,	K03456|1|0.0|1201|cel:CELE_F48E8.5|serine/threonine-protein phosphatase 2A regulatory subunit A	gi|25148661|ref|NP_498162.2|	0	Probable serine/threonine-protein phosphatase PP2A regulatory subunit [Caenorhabditis elegans]
novel_mir2	NM_061169.5	-34.5	0.048272	-52.79	318	dnj-12	GO:0005829,GO:0046872,GO:0031072,GO:0005524,GO:0051082,GO:0009792,GO:0006457,GO:0007052,GO:0008340,GO:0009408,	K09502|1|0.0|815|cel:CELE_F39B2.10|DnaJ homolog subfamily A member 1!K09505|4|1.43e-139|408|oaa:100082435|DnaJ homolog subfamily A member 4	gi|17507263|ref|NP_493570.1|	0	DNaJ domain (prokaryotic heat shock protein) [Caenorhabditis elegans]
novel_mir2	NM_001026500.3	-34.9	0.041359	-31.99	165	W09G3.7	-	K15421|1|1.03e-18|92.0|sko:102808547|secretion-regulating guanine nucleotide exchange factor!K19607|2|1.32e-15|84.0|soc:105196720|X-linked retinitis pigmentosa GTPase regulator!K11494|4|1.45e-15|83.6|hst:105182688|RCC1 and BTB domain-containing protein	gi|193203348|ref|NP_001021671.2|	0	Uncharacterized protein CELE_W09G3.7 [Caenorhabditis elegans]
novel_mir2	NM_001313345.1	-32.7	0.115773	-30.88	165	unc-34	GO:0030054,GO:0032433,GO:0031252,GO:0005737,GO:0005102,GO:0016477,GO:0048675,GO:0031103,GO:0008045,GO:0033563,GO:0040017,GO:0035262,	K06274|1|1.16e-18|93.6|crg:105320101|vasodilator-stimulated phosphoprotein!K05746|4|2.72e-17|89.4|tru:101076998|enabled	gi|392918266|ref|NP_503360.4|	0	Uncharacterized protein CELE_Y50D4C.1 [Caenorhabditis elegans]
novel_mir2	NM_067526.3	-26.6	0.522707	-52.43	304	Y66H1A.4	GO:0031429,GO:0003723,GO:0040002,GO:0006364,GO:0000003,GO:0001522,GO:0006898,	K11128|1|7.45e-151|424|cel:CELE_Y66H1A.4|H/ACA ribonucleoprotein complex subunit 1	gi|71999405|ref|NP_499927.2|	6.20271e-150	Probable H/ACA ribonucleoprotein complex subunit 1-like protein [Caenorhabditis elegans]
novel_mir2	NM_061818.4	-30.7	0.385348	-30.3	153	F54A3.2	-	K16803|1|7.66e-72|261|bmy:Bm1_06160|cytoskeleton-associated protein 5	gi|392889309|ref|NP_494219.4|	0	Uncharacterized protein CELE_F54A3.2 [Caenorhabditis elegans]
novel_mir2	NM_001268407.1	-26.3	0.599127	-51.02	305	grsp-2	-	-	gi|392899808|ref|NP_001255336.1|	1.21387e-130	Glycine Rich Secreted Protein [Caenorhabditis elegans]
novel_mir2	NM_059170.2	-27.2	0.654656	-25.81	150	F55A12.6	-	-	gi|71987056|ref|NP_491571.2|	0	Uncharacterized protein CELE_F55A12.6 [Caenorhabditis elegans]
novel_mir2	NM_001027194.3	-27.2	0.11545	-25.72	152	T24F1.7	GO:0016021,	-	gi|71996215|ref|NP_001022365.1|	1.33405e-50	Uncharacterized protein CELE_T24F1.7 [Caenorhabditis elegans]
novel_mir2	NM_058324.3	-28.4	0.496264	-25.41	157	R119.2	GO:0030145,GO:0004177,GO:0006508,	K01262|1|0.0|930|cel:CELE_R119.2|Xaa-Pro aminopeptidase [EC:3.4.11.9]	gi|392884626|ref|NP_490725.3|	0	Uncharacterized protein CELE_R119.2 [Caenorhabditis elegans]
novel_mir2	NM_170839.4	-33.1	0.145298	-30.25	154	M01B12.4	-	-	gi|25143733|ref|NP_740823.1|	0	Uncharacterized protein CELE_M01B12.4 [Caenorhabditis elegans]
novel_mir2	NM_078412.5	-30.5	0.366017	-30.8	159	F10D7.1	GO:0016021,GO:0004930,GO:0007186,	K04200|1|2.90e-23|107|isc:IscW_ISCW000606|melanocortin 2 receptor!K04289|2|1.84e-19|96.3|tca:103312315|lysophosphatidic acid receptor 1	gi|115535143|ref|NP_510813.2|	0	Uncharacterized protein CELE_F10D7.1 [Caenorhabditis elegans]
novel_mir2	NM_065873.3	-30.6	0.349931	-31.11	149	hpo-10	-	K16734|1|1.69e-10|68.2|cmk:103182040|SAC3 domain-containing protein 1	gi|17552900|ref|NP_498274.1|	0	Uncharacterized protein CELE_F01F1.1 [Caenorhabditis elegans]
novel_mir2	NM_001307177.1	-29.5	0.468139	-50.95	311	ntl-11	-	-	gi|808357156|ref|NP_001294106.1|	0	NOT-Like (yeast CCR4/NOT complex component) [Caenorhabditis elegans]
novel_mir2	NM_001027672.3	-28.9	0.509187	-29.29	157	ckr-2	GO:0016021,GO:0042923,GO:0004983,GO:0008340,GO:0007218,	K04196|1|0.0|1120|cel:CELE_Y39A3B.5|cholecystokinin-like receptor	gi|86563343|ref|NP_001022843.2|	0	CholecystoKinin Receptor homolog [Caenorhabditis elegans]
novel_mir2	NM_058384.3	-32.5	0.21924	-30.65	156	Y95B8A.8	GO:0003676,GO:0008270,GO:0007413,	K13203|1|0.0|1587|cel:CELE_Y95B8A.8|zinc finger RNA-binding protein	gi|392884704|ref|NP_490785.3|	0	Uncharacterized protein CELE_Y95B8A.8 [Caenorhabditis elegans]
novel_mir2	NR_071549.2	-28.4	0.055273	-28.29	149	F26A10.9	-	-	-	-	-
novel_mir2	NM_001307565.1	-29.1	0.517235	-33.21	148	Y77E11A.7	GO:0005515,GO:0009792,GO:0008340,GO:0040035,GO:0002119,GO:0040011,	-	gi|808357936|ref|NP_001294494.1|	0	Uncharacterized protein CELE_Y77E11A.7 [Caenorhabditis elegans]
novel_mir2	NM_001306524.1	-38.5	0.050944	-31.72	167	unc-89	GO:0031430,GO:0004672,GO:0019902,GO:0017048,GO:0005089,GO:0005524,GO:0035023,GO:0040011,GO:0006468,GO:0010171,GO:0030241,GO:0043547,	K08809|1|8.27e-60|233|sko:100378688|striated muscle-specific serine/threonine protein kinase [EC:2.7.11.1]	gi|71980588|ref|NP_001020985.1|	0	Muscle M-line assembly protein unc-89 [Caenorhabditis elegans]
novel_mir2	NR_056474.1	-30.6	0.786389	-28.2	148	gon-1	-	-	-	-	-
novel_mir2	NM_068954.5	-28.2	0.454564	-25.31	166	irld-8	GO:0016021,	-	gi|193206303|ref|NP_501355.3|	0	Insulin/EGF-Receptor L Domain protein [Caenorhabditis elegans]
novel_mir2	NM_001307330.1	-34.6	0.034762	-29.77	170	Y54G2A.26	-	-	gi|71998018|ref|NP_001023499.1|	0	Uncharacterized protein CELE_Y54G2A.26 [Caenorhabditis elegans]
novel_mir2	NM_068867.1	-26.8	0.594688	-44.36	302	C50F7.3	-	-	gi|17539376|ref|NP_501268.1|	0	Uncharacterized protein CELE_C50F7.3 [Caenorhabditis elegans]
novel_mir2	NM_076892.4	-30.5	0.398156	-26.39	163	pcca-1	GO:0005759,GO:0046872,GO:0005524,GO:0004075,GO:0004658,GO:0008152,	K01965|1|0.0|1498|cel:CELE_F27D9.5|propionyl-CoA carboxylase alpha chain [EC:6.4.1.3]	gi|17567343|ref|NP_509293.1|	0	Propionyl-CoA carboxylase alpha chain, mitochondrial [Caenorhabditis elegans]
novel_mir2	NM_001047361.4	-33.4	0.070882	-26.42	153	Y49F6B.9	GO:0016021,GO:0000151,GO:0005737,GO:0008270,GO:0031624,GO:0061630,GO:0000209,GO:0042787,GO:0032436,	K11972|1|0.0|802|cel:CELE_Y49F6B.9|E3 ubiquitin-protein ligase RNF19A [EC:2.3.2.27]	gi|193205193|ref|NP_001040825.2|	0	Uncharacterized protein CELE_Y49F6B.9 [Caenorhabditis elegans]
novel_mir2	NM_001028710.2	-29.6	0.159425	-26.52	149	F35E12.9	GO:0045121,GO:0045087,GO:0050829,	-	gi|71992719|ref|NP_001023881.1|	5.01037e-160	Uncharacterized protein CELE_F35E12.9 [Caenorhabditis elegans]
novel_mir2	NM_063181.5	-33.8	0.048958	-30.43	164	rol-8	GO:0016021,GO:0005581,GO:0042302,	K10599|1|1.50e-55|197|tsp:Tsp_00442|pre-mRNA-processing factor 19 [EC:2.3.2.27]!K08202|2|8.38e-29|122|tsp:Tsp_05167|MFS transporter, OCT family, solute carrier family 22 (organic cation transporter), member 4/5!K19721|3|3.08e-11|69.7|lcm:102349605|collagen, type V/XI/XXIV/XXVII, alpha	gi|17535689|ref|NP_495582.1|	0	Cuticle collagen 6 [Caenorhabditis elegans]
novel_mir2	NM_071111.3	-32.4	0.176545	-29.16	157	gly-7	GO:0000139,GO:0016021,GO:0046872,GO:0016757,GO:0030246,GO:0006486,	K00710|1|0.0|1260|cel:CELE_Y46H3A.6|polypeptide N-acetylgalactosaminyltransferase [EC:2.4.1.41]	gi|17561826|ref|NP_503512.1|	0	Probable N-acetylgalactosaminyltransferase 7 [Caenorhabditis elegans]
novel_mir2	NM_065357.3	-29.4	0.524679	-25.76	158	F34D10.4	-	-	gi|17553250|ref|NP_497758.1|	0	Uncharacterized protein CELE_F34D10.4 [Caenorhabditis elegans]
novel_mir2	NM_067681.4	-31.5	0.310964	-50.71	324	clp-7	-	K08585|1|0.0|798|cel:CELE_Y77E11A.10|calpain, invertebrate [EC:3.4.22.-]	gi|453232071|ref|NP_500082.2|	0	CaLPain family [Caenorhabditis elegans]
novel_mir2	NM_076727.5	-31.5	0.2318	-25.58	154	acr-2	GO:0043005,GO:0045211,GO:0005622,GO:0030054,GO:0005892,GO:0042166,GO:0015464,GO:0035094,GO:0098703,GO:0007274,GO:0099565,GO:0007271,	K05312|1|0.0|1185|cel:CELE_K11G12.2|nicotinic acetylcholine receptor, invertebrate	gi|17548189|ref|NP_509128.1|	0	Acetylcholine receptor subunit beta-type acr-2 [Caenorhabditis elegans]
novel_mir2	NM_001307521.1	-29.7	0.5294	-74.62	451	egl-4	GO:0005829,GO:0005634,GO:0046872,GO:0030553,GO:0005524,GO:0004692,GO:0030827,GO:0010468,GO:0030512,GO:0042542,GO:0046662,GO:0007635,GO:0040015,GO:1990834,GO:0030431,GO:0008340,GO:0006935,GO:0051343,GO:0050913,GO:0046621,GO:0050849,GO:1903998,GO:0018105,GO:0070482,GO:0030536,GO:0061067,GO:0030163,GO:0030308,GO:1902160,GO:0008286,GO:0010753,	K07376|1|0.0|1617|cel:CELE_F55A8.2|cGMP-dependent protein kinase 1 [EC:2.7.11.12]	gi|808357848|ref|NP_001294450.1|	0	cGMP-dependent protein kinase [Caenorhabditis elegans]
novel_mir2	NM_001313476.1	-30.4	0.696731	-26.43	166	Y105E8A.25	GO:0005089,GO:0040035,GO:0009792,GO:0035023,GO:0006915,GO:0040039,	K21072|1|5.44e-22|109|ola:101175242|A-kinase anchor protein 28!K12791|4|4.23e-20|102|dre:561276|Rho guanine nucleotide exchange factor 2!K21066|5|6.20e-20|102|bter:100644390|A-kinase anchor protein 18	gi|922581855|ref|NP_001300405.1|	0	Uncharacterized protein CELE_Y105E8A.25 [Caenorhabditis elegans]
novel_mir2	NM_068712.4	-28.8	0.377345	-46.03	300	ssq-3	-	-	gi|453232130|ref|NP_501113.2|	0	Sperm-Specific family, class Q [Caenorhabditis elegans]
novel_mir2	NM_001027565.3	-29.6	0.26414	-29.45	149	mboa-6	GO:0016021,GO:0005789,GO:0047184,GO:0040032,GO:0040010,GO:0006656,GO:0006646,GO:0000003,GO:0002119,GO:0009792,GO:0006659,	K13515|1|0.0|709|cel:CELE_R155.1|lysophospholipid acyltransferase 5 [EC:2.3.1.23 2.3.1.-]	gi|71989981|ref|NP_001022735.1|	0	Lysophospholipid acyltransferase 5 [Caenorhabditis elegans]
novel_mir2	NM_074332.4	-32.4	0.176226	-29.5	156	aipl-1	GO:0007015,GO:0000003,GO:0032880,	K16482|1|4.98e-19|94.4|aga:AgaP_AGAP012029|centriolar protein POC1	gi|17562372|ref|NP_506733.1|	0	AIP1 (Actin Interacting Protein 1) Like [Caenorhabditis elegans]
novel_mir2	NM_069202.5	-31.2	0.634755	-26.19	164	wnk-1	GO:0005829,GO:0005515,GO:0004674,GO:0005524,GO:0000122,GO:0007275,GO:0018991,GO:0032414,GO:2000021,GO:0006468,GO:0061404,GO:0050891,GO:0035556,	K08867|1|0.0|3505|cel:CELE_C46C2.1|WNK lysine deficient protein kinase [EC:2.7.11.1]	gi|71984730|ref|NP_501603.3|	0	Serine/threonine-protein kinase WNK [Caenorhabditis elegans]
novel_mir2	NM_075459.5	-30	0.259095	-25.48	156	dhs-24	-	K04506|1|2.11e-59|206|cfo:105255090|E3 ubiquitin-protein ligase SIAH1 [EC:2.3.2.27]!K11153|2|8.01e-49|171|dwi:Dwil_GK14729|retinol dehydrogenase 12 [EC:1.1.1.300]!K11161|3|1.11e-45|164|crg:105341249|retinol dehydrogenase 13 [EC:1.1.1.300]	gi|72001364|ref|NP_507860.3|	0	DeHydrogenases, Short chain [Caenorhabditis elegans]
novel_mir2	NM_001265159.2	-34.6	0.315778	-33.76	165	F22G12.5	GO:0005622,GO:0005085,GO:0043547,GO:0007264,	K13708|1|1.99e-08|65.9|mde:101891400|dedicator of cytokinesis protein 1!K17697|3|3.90e-06|58.2|cmy:102941448|dedicator of cytokinesis protein 4	gi|453230421|ref|NP_001252088.2|	0	Uncharacterized protein CELE_F22G12.5 [Caenorhabditis elegans]
novel_mir2	NM_064317.1	-31.4	0.177668	-27.14	156	tiar-2	GO:0010494,GO:0005634,GO:0003723,GO:0000166,GO:0002119,GO:0006972,GO:0000003,GO:0008340,GO:0009408,	K13201|1|0.0|887|cel:CELE_Y46G5A.13|nucleolysin TIA-1/TIAR	gi|17537143|ref|NP_496718.1|	0	TIA-1/TIAL RNA binding protein homolog [Caenorhabditis elegans]
novel_mir2	NR_071658.1	-29.8	0.027755	-26.4	149	R09F10.14	-	-	-	-	-
novel_mir2	NM_170824.3	-28.5	0.76472	-29.45	165	dot-1.1	GO:0005634,GO:0031151,GO:0051726,GO:0034729,	K11427|1|0.0|1958|cel:CELE_Y39G10AR.18|histone-lysine N-methyltransferase, H3 lysine-79 specific [EC:2.1.1.43]	gi|71994293|ref|NP_740808.2|	0	Histone-lysine N-methyltransferase, H3 lysine-79 specific [Caenorhabditis elegans]
novel_mir2	NM_075660.1	-30.7	0.203276	-30.3	153	T08D2.8	-	K16803|1|5.70e-24|109|loa:LOAG_05956|cytoskeleton-associated protein 5	gi|17569715|ref|NP_508061.1|	0	Uncharacterized protein CELE_T08D2.8 [Caenorhabditis elegans]
novel_mir2	NM_171886.4	-29.8	0.504242	-122.44	760	clp-1	GO:0031430,GO:0004198,GO:0010940,GO:0006508,	K08585|1|0.0|1466|cel:CELE_C06G4.2|calpain, invertebrate [EC:3.4.22.-]	gi|25152691|ref|NP_741237.1|	0	Calpain clp-1 [Caenorhabditis elegans]
novel_mir2	NM_171134.6	-28.3	0.723913	-55.87	316	mdt-15	GO:0016592,GO:0001104,GO:0003676,GO:0003713,GO:0035257,GO:0045893,GO:0008340,GO:0006357,GO:0030730,GO:0006898,GO:0040011,GO:0006915,GO:0009792,GO:0042594,GO:0002119,GO:0048477,GO:0019217,GO:0000398,GO:0040014,GO:0035188,	-	gi|25148761|ref|NP_741151.1|	0	Mediator of RNA polymerase II transcription subunit 15 [Caenorhabditis elegans]
novel_mir2	NM_073097.3	-31.8	0.133791	-31.35	168	ZK287.7	GO:0003723,GO:0009982,GO:0001522,	K13984|1|6.70e-06|53.5|phu:Phum_PHUM126760|thioredoxin domain-containing protein 5	gi|17566858|ref|NP_505498.1|	0	Uncharacterized protein CELE_ZK287.7 [Caenorhabditis elegans]
novel_mir2	NM_071110.2	-28	0.47406	-27.27	154	Y46H3A.5	GO:0016787,GO:0006629,	-	gi|392918392|ref|NP_503511.2|	0	Uncharacterized protein CELE_Y46H3A.5 [Caenorhabditis elegans]
novel_mir2	NM_001038349.2	-28.5	0.729856	-61.56	326	unc-33	GO:0005737,GO:0043005,GO:0016810,GO:0031005,GO:0007411,GO:0048675,GO:0008152,	K07529|1|2.16e-105|340|tru:101077016|dihydropyrimidinase-like 5!K01464|2|2.53e-105|339|apla:101796480|dihydropyrimidinase [EC:3.5.2.2]	gi|86575075|ref|NP_001033438.1|	0	Protein unc-33 [Caenorhabditis elegans]
novel_mir2	NM_078132.4	-31.9	0.16489	-25.44	158	kin-20	GO:0005737,GO:0005634,GO:0004674,GO:0005524,GO:0018105,GO:0008360,GO:0000003,GO:0048511,GO:0010171,GO:0016055,GO:0002119,GO:0040011,GO:0006897,GO:0009792,GO:0040018,	K08959|1|0.0|527|bmy:Bm1_37175|casein kinase 1, delta [EC:2.7.11.1]!K08960|2|0.0|520|tru:101068125|casein kinase 1, epsilon [EC:2.7.11.1]	gi|71990373|ref|NP_510533.3|	0	Casein kinase I isoform delta [Caenorhabditis elegans]
novel_mir2	NM_001129214.1	-30.1	0.483777	-28.86	159	unc-103	GO:0005887,GO:0005249,GO:0007617,GO:0046662,GO:0043050,GO:0071805,GO:0040011,GO:0006937,GO:0042391,GO:0030163,	K04905|1|0.0|1547|cel:CELE_C30D11.1|potassium voltage-gated channel Eag-related subfamily H member 2!K04910|4|0.0|794|crg:105328901|potassium voltage-gated channel Eag-related subfamily H member 7	gi|193205554|ref|NP_001122686.1|	0	Uncharacterized protein CELE_C30D11.1 [Caenorhabditis elegans]
novel_mir2	NM_060932.2	-29.2	0.403913	-28.5	159	M01E5.1	-	-	gi|193203031|ref|NP_493333.2|	0	Uncharacterized protein CELE_M01E5.1 [Caenorhabditis elegans]
novel_mir2	NM_066052.4	-28.3	0.453878	-30.79	143	ddo-3	GO:0005615,GO:0008445,GO:0071949,GO:0046416,GO:0055114,	K00272|1|8.22e-89|275|cbr:CBG04460|D-aspartate oxidase [EC:1.4.3.1]	gi|17553082|ref|NP_498453.1|	0	D-aspartate oxidase 3 [Caenorhabditis elegans]
novel_mir2	NM_001029570.2	-35.7	0.073956	-35.08	166	eat-20	GO:0009986,GO:0030424,GO:0016021,GO:0005509,GO:0040035,GO:0030163,	K02599|1|5.63e-17|91.3|crg:105322166|Notch 1!K17495|4|1.42e-15|87.4|tup:102500773|CUB and sushi domain-containing protein	gi|71992684|ref|NP_001024741.1|	0	Abnormal pharyngeal pumping eat-20 [Caenorhabditis elegans]
novel_mir2	NM_061033.3	-29.8	0.390029	-27.33	157	usp-3	GO:0036459,GO:0008270,GO:0016579,GO:0006511,	K11986|1|0.0|1150|cel:CELE_Y71A12B.9|ubiquitin carboxyl-terminal hydrolase 3 [EC:3.4.19.12]	gi|392887711|ref|NP_493434.3|	0	Ubiquitin carboxyl-terminal hydrolase [Caenorhabditis elegans]
novel_mir2	NM_171306.3	-27.5	0.568463	-25.85	148	nstp-6	GO:0000139,GO:0016021,GO:0005351,GO:0000003,GO:0008643,GO:0015992,	K15272|1|0.0|785|cel:CELE_B0212.4|solute carrier family 35 (UDP-sugar transporter), member A1/2/3	gi|25148765|ref|NP_741360.1|	0	Nucleotide Sugar TransPorter family [Caenorhabditis elegans]
novel_mir2	NR_056462.1	-32.7	0.009694	-28.54	169	F25H8.20	-	-	-	-	-
novel_mir2	NM_070205.5	-30.1	0.326279	-29.65	151	puf-3	GO:0005623,GO:0003730,GO:0005515,GO:0009792,GO:0035046,GO:0009992,GO:0006915,	K17943|1|1.03e-35|136|loa:LOAG_04126|pumilio RNA-binding family	gi|17541730|ref|NP_502606.1|	0	PUF (Pumilio/FBF) domain-containing [Caenorhabditis elegans]
novel_mir2	NM_064344.4	-30.6	0.201362	-28.52	158	clec-65	GO:0030246,GO:0045087,	K06238|1|2.37e-06|55.1|crg:105337864|collagen, type VI, alpha	gi|17533687|ref|NP_496745.1|	0	C-type LECtin [Caenorhabditis elegans]
novel_mir2	NM_001028711.3	-29.6	0.302714	-26.52	149	F35E12.9	GO:0045121,GO:0045087,GO:0050829,	-	gi|71992726|ref|NP_001023882.1|	0	Uncharacterized protein CELE_F35E12.9 [Caenorhabditis elegans]
novel_mir2	NM_059562.5	-30.4	0.42813	-77.55	461	glh-1	GO:0043186,GO:0048471,GO:0003723,GO:0004004,GO:0008270,GO:0043621,GO:0005524,GO:0008432,GO:0017151,GO:0010501,GO:0006915,GO:0009791,GO:0007281,	K13982|1|0.0|1544|cel:CELE_T21G5.3|probable ATP-dependent RNA helicase DDX4 [EC:3.6.4.13]	gi|17507877|ref|NP_491963.1|	0	ATP-dependent RNA helicase glh-1 [Caenorhabditis elegans]
novel_mir2	NM_001029800.2	-33.3	0.237659	-29.48	165	mig-15	GO:0005737,GO:0004702,GO:0005524,GO:0018991,GO:0006898,GO:0030334,GO:0032228,GO:0040039,GO:0019915,GO:0048675,GO:0023014,GO:0033563,GO:0002119,GO:0010171,GO:0040035,	K08840|1|0.0|2218|cel:CELE_ZC504.4|TRAF2 and NCK interacting kinase [EC:2.7.11.1]	gi|72003658|ref|NP_001024971.1|	0	Serine/threonine-protein kinase mig-15 [Caenorhabditis elegans]
novel_mir2	NM_001306225.1	-42.2	0.003759	-38.55	178	uba-2	GO:0008641,	K10685|1|0.0|1210|cel:CELE_W02A11.4|ubiquitin-like 1-activating enzyme E1 B [EC:6.2.1.45]	gi|808354511|ref|NP_001293154.1|	0	SUMO-activating enzyme subunit uba-2 [Caenorhabditis elegans]
novel_mir2	NM_001307109.1	-31.2	0.60401	-26.19	164	wnk-1	GO:0005829,GO:0005515,GO:0004674,GO:0005524,GO:0000122,GO:0007275,GO:0018991,GO:0032414,GO:2000021,GO:0006468,GO:0061404,GO:0050891,GO:0035556,	K08867|1|0.0|3011|cel:CELE_C46C2.1|WNK lysine deficient protein kinase [EC:2.7.11.1]	gi|808357020|ref|NP_001294038.1|	0	Serine/threonine-protein kinase WNK [Caenorhabditis elegans]
novel_mir2	NM_064215.2	-31.7	0.130519	-29.13	148	sre-53	GO:0016021,GO:0007606,	-	gi|71984368|ref|NP_496616.2|	0	Serpentine Receptor, class E (epsilon) [Caenorhabditis elegans]
novel_mir2	NM_001268583.1	-33.7	0.151879	-32.64	161	miz-1	GO:0002119,	-	gi|392900598|ref|NP_001255512.1|	0	MIZ-type zinc finger putative transcription factor [Caenorhabditis elegans]
novel_mir2	NM_058397.5	-29.9	0.251026	-25.32	153	cutl-20	-	-	gi|17507565|ref|NP_490798.1|	0	CUTiclin-Like [Caenorhabditis elegans]
novel_mir2	NM_182112.3	-33.8	0.036158	-30.43	164	rol-8	GO:0016020,GO:0005581,GO:0042302,	K10599|1|1.34e-45|167|tsp:Tsp_00442|pre-mRNA-processing factor 19 [EC:2.3.2.27]!K08202|2|7.90e-25|108|tsp:Tsp_05167|MFS transporter, OCT family, solute carrier family 22 (organic cation transporter), member 4/5!K06236|3|9.45e-08|58.2|hro:HELRODRAFT_156503|collagen, type I, alpha	gi|32563818|ref|NP_871912.1|	0	Cuticle collagen 6 [Caenorhabditis elegans]
novel_mir2	NM_001027396.3	-33.3	0.210801	-33.95	158	rbf-1	GO:0030054,GO:0008021,GO:0005886,GO:0017137,GO:0005509,GO:0005544,GO:0030276,GO:0019905,GO:0006906,GO:1990504,GO:0017158,GO:0040017,GO:0048791,GO:0006886,	K19917|1|0.0|1982|cel:CELE_F37A4.7|double C2-like domain-containing protein beta!K19938|5|8.60e-85|290|crg:105326480|rabphilin-3A	gi|71985460|ref|NP_001022567.1|	0	Rabphilin-1 [Caenorhabditis elegans]
novel_mir2	NM_182113.6	-26.4	0.354669	-47.63	292	rsp-1	GO:0005634,GO:0003723,GO:0000166,GO:0000398,GO:0007283,GO:0030154,GO:0040009,GO:0040026,GO:0040011,GO:0009792,	K12893|1|5.92e-98|288|cel:CELE_W02B12.3|splicing factor, arginine/serine-rich 4/5/6	gi|32563820|ref|NP_871913.1|	4.47961e-99	Probable splicing factor, arginine/serine-rich 1 [Caenorhabditis elegans]
novel_mir2	NM_001028213.3	-28.3	0.394973	-26.27	158	nlp-16	GO:0007218,	-	gi|71993947|ref|NP_001023384.1|	0	Neuropeptide-Like Protein [Caenorhabditis elegans]
novel_mir2	NM_060921.2	-30.7	0.264901	-29.25	172	ZK1053.6	GO:0016021,GO:0008324,GO:0098655,	K15122|1|4.82e-45|171|nvi:100119392|solute carrier family 41	gi|115533778|ref|NP_493322.2|	0	Uncharacterized protein CELE_ZK1053.6 [Caenorhabditis elegans]
novel_mir2	NR_102024.1	-28	0.154763	-25.26	152	linc-92	-	-	-	-	-
novel_mir2	NM_001267451.1	-31.7	0.08084	-63.64	308	sam-10	GO:0005737,GO:0005634,GO:0048755,GO:0007416,GO:1902473,GO:0010629,	-	gi|392892245|ref|NP_001254380.1|	1.07612e-166	Single-stranded DNA-binding protein homolog sam-10 [Caenorhabditis elegans]
novel_mir2	NM_001028243.1	-32.7	0.120306	-29.61	150	hlh-30	GO:0005737,GO:0005634,GO:0000981,GO:0046983,GO:0010506,GO:0050829,GO:0008340,GO:0045944,GO:0000003,GO:0019915,GO:0050830,	K09105|1|5.48e-29|123|ola:101166296|transcription factor E3!K09455|2|5.55e-29|122|dre:30080|microphthalmia-associated transcription factor	gi|71994970|ref|NP_001023414.1|	0	Helix Loop Helix [Caenorhabditis elegans]
novel_mir2	NM_001267443.1	-30	0.171189	-51.97	303	Y81G3A.4	-	-	gi|392892205|ref|NP_001254372.1|	0	Uncharacterized protein CELE_Y81G3A.4 [Caenorhabditis elegans]
novel_mir2	NR_071056.1	-33.9	0.001826	-32.88	168	C25F6.9	-	-	-	-	-
novel_mir2	NM_001269124.1	-32	0.119986	-29.42	162	R02F11.10	GO:0016021,	K06794|1|1.24e-06|54.3|tng:GSTEN00028488G001|neurocan core protein	gi|392918912|ref|NP_001256053.1|	0	Uncharacterized protein CELE_R02F11.10 [Caenorhabditis elegans]
novel_mir2	NM_001306812.1	-30.7	0.313776	-27.99	153	C02B10.5	GO:0009792,GO:0000003,GO:0010171,	-	gi|17538404|ref|NP_500719.1|	0	Uncharacterized protein CELE_C02B10.5 [Caenorhabditis elegans]
novel_mir2	NM_068123.4	-30.9	0.142367	-26.9	147	col-33	GO:0016021,GO:0005581,GO:0042302,	K06237|1|1.78e-14|79.3|phu:Phum_PHUM136030|collagen, type IV, alpha	gi|71987869|ref|NP_500524.2|	0	COLlagen [Caenorhabditis elegans]
novel_mir2	NM_001322670.1	-35.7	0.017646	-27.98	155	numr-2	GO:0005634,	-	gi|17552944|ref|NP_498627.1|	0	NUclear localized Metal Responsive [Caenorhabditis elegans]
novel_mir2	NM_001026835.3	-33.2	0.250504	-31.17	162	shn-1	GO:0005515,GO:0030421,GO:0007622,	K15009|1|0.0|2301|cel:CELE_C33B4.3|SH3 and multiple ankyrin repeat domains protein	gi|71983513|ref|NP_001022006.1|	0	SHaNk (SH3/ankyrin domain scaffold protein) related [Caenorhabditis elegans]
novel_mir2	NM_182275.4	-31.2	0.602538	-26.19	164	wnk-1	GO:0005829,GO:0005515,GO:0004674,GO:0005524,GO:0000122,GO:0007275,GO:0018991,GO:0032414,GO:2000021,GO:0006468,GO:0061404,GO:0050891,GO:0035556,	K08867|1|0.0|3005|cel:CELE_C46C2.1|WNK lysine deficient protein kinase [EC:2.7.11.1]	gi|71984736|ref|NP_872075.2|	0	Serine/threonine-protein kinase WNK [Caenorhabditis elegans]
novel_mir2	NM_001025910.4	-25.7	0.799754	-29.43	150	lin-44	GO:0005615,GO:0005578,GO:0005109,GO:0097402,GO:0008340,GO:0007163,GO:0046662,GO:0051964,GO:0097475,GO:0045138,GO:0040028,GO:0060573,GO:0016055,GO:1904936,GO:0030182,	K14565|1|3.26e-61|212|tsp:Tsp_10405|nucleolar protein 58!K01357|2|2.18e-52|182|crg:105348240|wingless-type MMTV integration site family, member 10!K01064|4|3.51e-48|170|xtr:100497091|wingless-type MMTV integration site family, member 9	gi|71983093|ref|NP_001021081.1|	0	Abnormal cell lineage protein 44 [Caenorhabditis elegans]
novel_mir2	NM_001307279.1	-30.1	0.350824	-30.44	156	cima-1	GO:0005764,GO:0016021,GO:0015136,GO:0042176,GO:0050807,GO:1905039,GO:0015739,	K12301|1|7.65e-50|184|cin:100187364|MFS transporter, ACS family, solute carrier family 17 (sodium-dependent inorganic phosphate cotransporter), member 5!K08193|4|5.87e-47|175|bim:100747948|MFS transporter, ACS family, solute carrier family 17 (sodium-dependent inorganic phosphate cotransporter), other	gi|808357360|ref|NP_001294208.1|	0	Uncharacterized protein CELE_F45E4.11 [Caenorhabditis elegans]
novel_mir2	NM_068147.1	-28.7	0.590235	-26.77	154	W03B1.9	-	-	gi|17542764|ref|NP_500548.1|	0	Uncharacterized protein CELE_W03B1.9 [Caenorhabditis elegans]
novel_mir2	NM_171267.5	-29.1	0.514737	-33.21	148	Y77E11A.7	GO:0005515,GO:0009792,GO:0008340,GO:0040035,GO:0002119,GO:0040011,	-	gi|71999619|ref|NP_741316.2|	0	Uncharacterized protein CELE_Y77E11A.7 [Caenorhabditis elegans]
novel_mir2	NM_071048.4	-28	0.155295	-27.05	157	F16B4.5	GO:0009792,GO:0000003,GO:0006898,GO:0002119,	-	gi|922580736|ref|NP_503449.2|	7.58527e-84	Uncharacterized protein CELE_F16B4.5 [Caenorhabditis elegans]
novel_mir2	NM_001029083.2	-32.7	0.070893	-30.88	165	unc-34	GO:0030054,GO:0032433,GO:0031252,GO:0005737,GO:0005102,GO:0016477,GO:0048675,GO:0031103,GO:0008045,GO:0033563,GO:0040017,GO:0035262,	K06274|1|3.92e-18|89.4|crg:105320101|vasodilator-stimulated phosphoprotein!K05746|5|5.65e-17|80.5|bfo:BRAFLDRAFT_256955|enabled	gi|922581406|ref|NP_001300273.1|	0	Uncharacterized protein CELE_Y50D4C.1 [Caenorhabditis elegans]
novel_mir2	NM_001027715.2	-31.9	0.327317	-26.88	153	rsa-2	GO:0005813,GO:0030674,GO:0040035,GO:0009792,GO:0007052,GO:0033365,GO:0040011,	-	gi|71994261|ref|NP_001022886.1|	0	Regulator of Spindle Assembly [Caenorhabditis elegans]
novel_mir2	NM_171669.3	-26.8	0.394232	-28.99	149	paf-2	GO:0005789,GO:0005829,GO:0003847,GO:0009792,GO:0016331,GO:0016042,GO:0000003,	K01062|1|1.65e-138|396|cel:CELE_C52B9.7|platelet-activating factor acetylhydrolase [EC:3.1.1.47]	gi|25150371|ref|NP_741769.1|	5.95749e-142	Platelet-activating factor acetylhydrolase homolog 2 [Caenorhabditis elegans]
novel_mir2	NM_001268884.1	-29.9	0.518245	-27.83	165	tag-273	GO:0008270,GO:0000003,	-	gi|392901826|ref|NP_001255813.1|	0	Uncharacterized protein CELE_Y57G11A.1 [Caenorhabditis elegans]
novel_mir2	NM_001027131.4	-31.8	0.138719	-30.88	165	mmaa-1	GO:0005739,GO:0005524,GO:0003924,GO:0005525,GO:0009236,GO:0009792,	K07588|1|0.0|823|cel:CELE_T02G5.13|LAO/AO transport system kinase [EC:2.7.-.-]	gi|71994271|ref|NP_001022302.1|	0	Methylmalonic aciduria type A homolog, mitochondrial [Caenorhabditis elegans]
novel_mir2	NM_001276749.1	-33.1	0.335118	-29.81	158	pqn-87	-	K14454|1|1.09e-41|173|tsp:Tsp_11254|aspartate aminotransferase, cytoplasmic [EC:2.6.1.1]!K11838|2|2.02e-33|146|bmor:101739310|ubiquitin carboxyl-terminal hydrolase 7 [EC:3.4.19.12]	gi|453231852|ref|NP_001263678.1|	0	Prion-like-(Q/N-rich)-domain-bearing protein [Caenorhabditis elegans]
novel_mir2	NM_001267986.1	-30.5	0.401372	-27.36	148	cdk-12	GO:0005694,GO:0005634,GO:0008353,GO:0005524,GO:0004693,GO:0006468,GO:0051726,GO:0040035,GO:0010171,GO:0002119,GO:0040011,GO:0006898,GO:0009792,	K08819|1|0.0|1497|cel:CELE_B0285.1|cyclin-dependent kinase 12/13 [EC:2.7.11.22 2.7.11.23]	gi|392894692|ref|NP_001254915.1|	0	Cyclin-dependent kinase 12 [Caenorhabditis elegans]
novel_mir2	NM_059825.5	-28.8	0.737818	-25.07	157	lin-10	GO:0030054,GO:0032580,GO:0030425,GO:0000138,GO:0045202,GO:0043025,GO:0030140,GO:0005886,GO:0017137,GO:0006810,GO:0008105,GO:1903361,GO:0050975,GO:1902946,GO:0097120,GO:0007399,GO:0007270,GO:0040026,	K20055|1|2.13e-157|474|aml:100464192|amyloid beta A4 precursor protein-binding family A member 2!K04531|5|5.99e-154|480|pale:102888517|amyloid beta A4 precursor protein-binding family A member 1	gi|71980631|ref|NP_492226.2|	0	Protein lin-10 [Caenorhabditis elegans]
novel_mir2	NM_071001.4	-33.6	0.189166	-30.02	162	egl-2	GO:0005622,GO:0005887,GO:0031528,GO:0005249,GO:0019901,GO:0000155,GO:0000160,GO:0007635,GO:0018991,GO:0023014,GO:0071805,GO:0042391,GO:0030163,GO:0006936,	K04908|1|0.0|1995|cel:CELE_F16B3.1|potassium voltage-gated channel Eag-related subfamily H member 5	gi|71989969|ref|NP_503402.3|	0	Uncharacterized protein CELE_F16B3.1 [Caenorhabditis elegans]
novel_mir2	NM_001029306.2	-25.8	0.734461	-26.15	150	ref-2	GO:0005737,GO:0005634,GO:0003676,GO:0046872,GO:0000166,GO:0018991,GO:0048665,GO:0040035,GO:0019915,GO:0002119,GO:0040011,GO:0006352,	K09227|1|0.0|639|cel:CELE_C47C12.3|zinc finger protein ZIC, invertebrate!K06235|4|9.26e-56|186|umr:103657640|zinc finger protein ZIC 2	gi|71985689|ref|NP_001024478.1|	0	REgulator of Fusion [Caenorhabditis elegans]
novel_mir2	NM_060648.3	-28.3	0.634767	-40.73	280	hrp-2	GO:0003676,GO:0000166,	K13161|1|2.12e-139|424|sko:100376856|heterogeneous nuclear ribonucleoprotein R!K13160|2|3.57e-131|402|lav:100674765|heterogeneous nuclear ribonucleoprotein Q	gi|71987750|ref|NP_493049.2|	0	human HnRNP A1 homolog [Caenorhabditis elegans]
novel_mir2	NM_078177.1	-32.7	0.026708	-27.19	159	F59D12.5	-	-	gi|17568303|ref|NP_510578.1|	1.49416e-114	Uncharacterized protein CELE_F59D12.5 [Caenorhabditis elegans]
novel_mir2	NM_060973.2	-31.2	0.120864	-29.08	141	Y87G2A.2	GO:0047617,GO:0006637,	K11992|1|2.99e-43|155|tng:GSTEN00014144G001|acyl-CoA thioesterase 8 [EC:3.1.2.27]	gi|212645202|ref|NP_493374.2|	0	Uncharacterized protein CELE_Y87G2A.2 [Caenorhabditis elegans]
novel_mir2	NM_065423.5	-30.1	0.479247	-28.86	159	unc-103	GO:0005887,GO:0005249,GO:0007617,GO:0046662,GO:0043050,GO:0071805,GO:0040011,GO:0006937,GO:0042391,GO:0030163,	K04905|1|0.0|1548|cel:CELE_C30D11.1|potassium voltage-gated channel Eag-related subfamily H member 2!K04910|4|0.0|795|crg:105328901|potassium voltage-gated channel Eag-related subfamily H member 7	gi|17555416|ref|NP_497824.1|	0	Uncharacterized protein CELE_C30D11.1 [Caenorhabditis elegans]
novel_mir2	NM_001028331.3	-31.3	0.148875	-32.09	166	Y54G2A.37	-	K06563|1|2.25e-11|67.4|fpg:101924769|CD209 antigen!K06794|2|1.60e-07|58.5|mze:101483384|neurocan core protein!K06560|3|3.49e-07|57.8|tru:101072482|mannose receptor, C type!K06792|4|3.76e-07|57.4|mze:101465412|aggrecan 1!K17513|5|7.93e-07|52.8|bfo:BRAFLDRAFT_207962|C-type lectin superfamily 17 member A	gi|808355914|ref|NP_001023502.3|	0	Uncharacterized protein CELE_Y54G2A.37 [Caenorhabditis elegans]
novel_mir2	NM_001268948.1	-30.2	0.452919	-28.57	163	Y105C5A.15	GO:0005634,GO:0000977,GO:0003700,GO:0006357,	-	gi|392902030|ref|NP_001255877.1|	0	Uncharacterized protein CELE_Y105C5A.15 [Caenorhabditis elegans]
novel_mir2	NM_058403.3	-26.8	0.671736	-26.16	146	C54G6.3	GO:0016021,	-	gi|808354435|ref|NP_490804.3|	0	Uncharacterized protein CELE_C54G6.3 [Caenorhabditis elegans]
novel_mir2	NM_066994.1	-30.6	0.209708	-30.16	162	C44B9.2	GO:0005615,	-	gi|17552598|ref|NP_499395.1|	0	Uncharacterized protein CELE_C44B9.2 [Caenorhabditis elegans]
novel_mir2	NM_171834.3	-33.1	0.147863	-30.25	154	M01B12.4	-	-	gi|25143735|ref|NP_740824.1|	0	Uncharacterized protein CELE_M01B12.4 [Caenorhabditis elegans]
novel_mir2	NM_001027585.3	-33.7	0.077949	-30.9	158	nex-2	GO:0005545,GO:0008201,GO:0008429,GO:0005509,GO:0001786,GO:0043395,GO:0005544,GO:0009792,GO:0043652,GO:0007052,	K17095|1|0.0|924|cel:CELE_T07C4.9|annexin A7/11	gi|71990586|ref|NP_001022755.1|	0	Annexin [Caenorhabditis elegans]
novel_mir2	NM_171597.1	-31.3	0.151792	-29.77	159	dyf-17	GO:0035869,	-	gi|25154793|ref|NP_741687.1|	0	Uncharacterized protein CELE_Y39B6A.11 [Caenorhabditis elegans]
novel_mir2	NM_067168.1	-29.3	0.160934	-33.32	146	Y79H2A.4	GO:0016021,GO:0000166,GO:0006898,	-	gi|17556566|ref|NP_499569.1|	3.29717e-147	Uncharacterized protein CELE_Y79H2A.4 [Caenorhabditis elegans]
novel_mir2	NR_132617.1	-28.8	0.539338	-26.9	155	Y71F9B.13	-	-	-	-	-
novel_mir2	NM_078146.3	-30.5	0.482554	-53.66	311	pqn-36	-	-	gi|17567551|ref|NP_510547.1|	0	Prion-like-(Q/N-rich)-domain-bearing protein [Caenorhabditis elegans]
novel_mir2	NM_001027564.3	-29.6	0.363423	-29.45	149	mboa-6	GO:0016021,GO:0005789,GO:0047184,GO:0040032,GO:0040010,GO:0006656,GO:0006646,GO:0000003,GO:0002119,GO:0009792,GO:0006659,	K13515|1|0.0|975|cel:CELE_R155.1|lysophospholipid acyltransferase 5 [EC:2.3.1.23 2.3.1.-]	gi|71989981|ref|NP_001022735.1|	0	Lysophospholipid acyltransferase 5 [Caenorhabditis elegans]
novel_mir2	NM_001028178.3	-31.7	0.521619	-56.31	307	klp-12	GO:0005871,GO:0003777,GO:0008017,GO:0016765,GO:0005524,GO:0016887,GO:0007018,GO:0006486,GO:0009792,	K10395|1|0.0|3258|cel:CELE_T01G1.1|kinesin family member 4/21/27	gi|71993010|ref|NP_001023349.1|	0	Kinesin-like protein [Caenorhabditis elegans]
novel_mir2	NM_058447.2	-27.6	0.712659	-55.1	303	Y92H12BR.7	-	-	gi|86561643|ref|NP_490848.2|	0	Uncharacterized protein CELE_Y92H12BR.7 [Caenorhabditis elegans]
novel_mir2	NM_001027673.3	-28.9	0.44975	-29.29	157	ckr-2	GO:0016021,GO:0042923,GO:0004983,GO:0008340,GO:0007218,	K04196|1|3.24e-157|463|cbr:CBG15122|cholecystokinin-like receptor	gi|71993366|ref|NP_001022844.1|	0	CholecystoKinin Receptor homolog [Caenorhabditis elegans]
novel_mir2	NR_136395.1	-28.7	0.57089	-28.01	152	Y55F3AM.3	-	-	-	-	-
novel_mir2	NM_001269613.1	-29.6	0.272975	-26.52	149	F35E12.9	GO:0045121,GO:0045087,GO:0050829,	-	gi|392921615|ref|NP_001256542.1|	0	Uncharacterized protein CELE_F35E12.9 [Caenorhabditis elegans]
novel_mir2	NM_059601.6	-27.5	0.486633	-25.91	155	tofu-5	GO:0009792,GO:0000003,	-	gi|17509441|ref|NP_492002.1|	0	Twenty One u-rna (21U-RNA) biogenesis Fouled Up [Caenorhabditis elegans]
novel_mir2	NM_064607.4	-35.7	0.023077	-39.01	165	cysl-2	GO:0005737,GO:0030170,GO:0004124,GO:0016740,GO:0050017,GO:0008652,GO:0006535,	K01738|1|0.0|691|cel:CELE_K10H10.2|cysteine synthase A [EC:2.5.1.47]	gi|17535051|ref|NP_497008.1|	0	Bifunctional L-3-cyanoalanine synthase/cysteine synthase [Caenorhabditis elegans]
novel_mir2	NM_001268448.1	-31.2	0.624518	-26.19	164	wnk-1	GO:0005829,GO:0005515,GO:0004674,GO:0005524,GO:0000122,GO:0007275,GO:0018991,GO:0032414,GO:2000021,GO:0006468,GO:0061404,GO:0050891,GO:0035556,	K08867|1|0.0|3400|cel:CELE_C46C2.1|WNK lysine deficient protein kinase [EC:2.7.11.1]	gi|392899985|ref|NP_001255377.1|	0	Serine/threonine-protein kinase WNK [Caenorhabditis elegans]
novel_mir2	NM_001268891.1	-29.6	0.592375	-26.5	157	anoh-2	GO:0016021,	K19502|1|0.0|1862|cel:CELE_Y57G11C.37|anoctamin-8	gi|392901849|ref|NP_001255820.1|	0	Anoctamin [Caenorhabditis elegans]
novel_mir2	NM_001267450.1	-31.7	0.167604	-63.64	308	sam-10	GO:0005737,GO:0005634,GO:0048755,GO:0007416,GO:1902473,GO:0010629,	-	gi|392892243|ref|NP_001254379.1|	0	Single-stranded DNA-binding protein homolog sam-10 [Caenorhabditis elegans]
novel_mir2	NM_064316.4	-31.5	0.081381	-30.16	157	vps-2	GO:0005737,GO:0009792,GO:0007034,	K12191|1|5.24e-169|469|cel:CELE_Y46G5A.12|charged multivesicular body protein 2A	gi|17537141|ref|NP_496717.1|	4.36387e-168	related to yeast Vacuolar Protein Sorting factor [Caenorhabditis elegans]
novel_mir2	NM_058393.4	-25.7	0.394361	-25.43	142	Y95B8A.2	GO:0004222,GO:0008270,GO:0006508,	-	gi|17510713|ref|NP_490794.1|	7.63274e-84	Uncharacterized protein CELE_Y95B8A.2 [Caenorhabditis elegans]
novel_mir2	NM_001047716.2	-32.8	0.397494	-31.22	174	arid-1	GO:0017053,GO:0005634,GO:0044212,GO:0006357,	K19194|1|1.12e-29|134|mze:101464646|AT-rich interactive domain-containing protein 4A!K07874|5|3.06e-29|133|hst:105188116|Ras-related protein Rab-1A	gi|392918113|ref|NP_001041181.2|	0	ARID (AT-rich Interactive Domain-containing protein) homolog [Caenorhabditis elegans]
novel_mir2	NM_001029444.1	-33.6	0.059227	-31.86	163	arg-1	GO:0016021,GO:0009880,GO:0040020,GO:0030154,GO:0042127,GO:0007154,	K02599|1|7.85e-15|81.3|sko:100368704|Notch 1!K06051|2|5.25e-14|78.6|dwi:Dwil_GK13480|delta	gi|71989021|ref|NP_001024615.1|	0	Delta-like protein [Caenorhabditis elegans]
novel_mir2	NM_001269941.1	-32.4	0.409688	-30.42	159	Y43F8B.3	GO:0004867,GO:0010951,	K03909|1|1.81e-24|109|hgl:101710461|tissue factor pathway inhibitor	gi|392922998|ref|NP_001256870.1|	0	Uncharacterized protein CELE_Y43F8B.3 [Caenorhabditis elegans]
novel_mir2	NM_001347274.1	-28.9	0.298379	-73.97	453	grl-23	-	-	gi|392921181|ref|NP_001256430.1|	9.118e-171	GRound-Like (grd related) [Caenorhabditis elegans]
novel_mir2	NM_171900.2	-28.9	0.462861	-25.39	155	Y69A2AR.1	-	-	gi|71999467|ref|NP_741344.2|	0	Uncharacterized protein CELE_Y69A2AR.1 [Caenorhabditis elegans]
novel_mir2	NM_073089.2	-29.4	0.407862	-25.46	155	cyp-29A4	GO:0020037,GO:0016705,GO:0004497,GO:0005506,GO:0055114,	K17952|1|0.0|1042|cel:CELE_B0331.1|cytochrome P450 family 29 subfamily A	gi|212646200|ref|NP_505490.2|	0	CYtochrome P450 family [Caenorhabditis elegans]
novel_mir2	NM_069476.4	-29.3	0.350548	-27.01	162	lipl-7	GO:0016788,GO:0016042,	K01052|1|4.92e-100|306|bmy:Bm1_21635|lysosomal acid lipase/cholesteryl ester hydrolase [EC:3.1.1.13]!K14452|3|2.73e-97|300|chx:108634007|gastric triacylglycerol lipase [EC:3.1.1.3]	gi|133930915|ref|NP_501877.2|	0	Lipase [Caenorhabditis elegans]
novel_mir2	NM_001028240.3	-32.7	0.135621	-29.61	150	hlh-30	GO:0005737,GO:0005634,GO:0000981,GO:0046983,GO:0010506,GO:0050829,GO:0008340,GO:0045944,GO:0000003,GO:0019915,GO:0050830,	K09455|1|5.94e-29|123|dre:30080|microphthalmia-associated transcription factor!K09105|2|1.81e-28|122|ola:101166296|transcription factor E3	gi|71994958|ref|NP_001023411.1|	0	Helix Loop Helix [Caenorhabditis elegans]
novel_mir2	NM_070674.5	-30.5	0.275821	-33.45	158	T28F3.8	-	-	gi|392902261|ref|NP_503075.2|	0	Uncharacterized protein CELE_T28F3.8 [Caenorhabditis elegans]
novel_mir2	NM_064193.3	-33.1	0.329934	-29.81	158	pqn-87	-	K14454|1|1.07e-41|173|tsp:Tsp_11254|aspartate aminotransferase, cytoplasmic [EC:2.6.1.1]!K11838|2|2.02e-33|146|bmor:101739310|ubiquitin carboxyl-terminal hydrolase 7 [EC:3.4.19.12]	gi|71998465|ref|NP_496594.2|	0	Prion-like-(Q/N-rich)-domain-bearing protein [Caenorhabditis elegans]
novel_mir2	NM_067367.6	-30.1	0.169054	-27.9	162	nas-1	GO:0004222,GO:0008270,GO:0006508,	K08076|1|0.0|568|cel:CELE_F45G2.1|astacin [EC:3.4.24.21]!K19323|4|1.00e-52|189|tsp:Tsp_04481|ataxin-10	gi|71986142|ref|NP_499768.2|	0	Zinc metalloproteinase nas-1 [Caenorhabditis elegans]
novel_mir2	NM_001269942.1	-32.4	0.39153	-30.42	159	Y43F8B.3	GO:0004867,GO:0010951,	K03909|1|1.11e-25|114|asn:102388104|tissue factor pathway inhibitor	gi|392923000|ref|NP_001256871.1|	0	Uncharacterized protein CELE_Y43F8B.3 [Caenorhabditis elegans]
novel_mir2	NM_001267479.1	-35	0.114288	-30.52	166	Y51H1A.2	-	K19330|1|5.40e-37|156|sko:100377422|run domain Beclin-1 interacting and cysteine-rich containing protein	gi|392892357|ref|NP_001254407.1|	0	Uncharacterized protein CELE_Y51H1A.2 [Caenorhabditis elegans]
novel_mir2	NM_001306720.1	-30.1	0.457794	-28.86	159	unc-103	GO:0005887,GO:0005249,GO:0007617,GO:0046662,GO:0043050,GO:0071805,GO:0040011,GO:0006937,GO:0042391,GO:0030163,	K04905|1|0.0|1549|cel:CELE_C30D11.1|potassium voltage-gated channel Eag-related subfamily H member 2!K04910|4|0.0|791|crg:105328901|potassium voltage-gated channel Eag-related subfamily H member 7	gi|808355730|ref|NP_001293649.1|	0	Uncharacterized protein CELE_C30D11.1 [Caenorhabditis elegans]
novel_mir2	NM_171728.2	-31.1	0.529816	-28.88	158	F48E3.8	GO:0005783,GO:0016810,GO:0005975,	K20879|1|1.37e-22|111|cbr:CBG05211|NIMA (never in mitosis gene a)-related kinase 10 [EC:2.7.11.1]	gi|193210223|ref|NP_741839.2|	0	Uncharacterized protein CELE_F48E3.8 [Caenorhabditis elegans]
novel_mir2	NM_078144.3	-30.5	0.480622	-53.66	311	pqn-36	-	-	gi|17567553|ref|NP_510545.1|	0	Prion-like-(Q/N-rich)-domain-bearing protein [Caenorhabditis elegans]
novel_mir2	NM_074186.6	-26.6	0.698821	-26.96	148	clec-57	-	K14616|1|5.82e-21|100|fab:101818432|cubilin	gi|32566786|ref|NP_506587.2|	0	C-type LECtin [Caenorhabditis elegans]
novel_mir2	NM_062048.2	-31.7	0.045316	-32.82	158	Y25C1A.2	-	-	gi|392889480|ref|NP_494449.2|	1.34642e-118	Uncharacterized protein CELE_Y25C1A.2 [Caenorhabditis elegans]
novel_mir2	NM_066339.5	-29.8	0.493444	-97.92	613	clp-1	GO:0031430,GO:0004198,GO:0010940,GO:0006508,	K08585|1|0.0|1449|cel:CELE_C06G4.2|calpain, invertebrate [EC:3.4.22.-]	gi|71981307|ref|NP_498740.2|	0	Calpain clp-1 [Caenorhabditis elegans]
novel_mir2	NR_068790.1	-34.8	0.001081	-31.93	165	F44E7.15	-	-	-	-	-
novel_mir2	NM_075231.4	-30.9	0.241009	-29.29	156	Y51A2D.13	GO:0016021,GO:0003824,GO:0008152,	K16860|1|1.47e-139|416|tsp:Tsp_09561|phospholipase D3/4 [EC:3.1.4.4]	gi|17565994|ref|NP_507632.1|	0	Uncharacterized protein CELE_Y51A2D.13 [Caenorhabditis elegans]
novel_mir2	NM_171926.3	-34.8	0.090681	-32.15	173	Y61A9LA.3	-	-	gi|25155126|ref|NP_741528.1|	0	Uncharacterized protein CELE_Y61A9LA.3 [Caenorhabditis elegans]
novel_mir2	NR_131680.1	-32.7	0.057783	-30.87	171	F54E2.8	-	-	-	-	-
novel_mir2	NR_069630.1	-29	0.044893	-26.03	147	R13H4.10	-	-	-	-	-
novel_mir2	NM_058795.3	-30.1	0.442753	-55.34	309	acd-5	GO:0016021,GO:0005272,GO:0035725,	K03440|1|0.0|1498|cel:CELE_T28F2.7|acid-sensing ion channel, other	gi|392885188|ref|NP_491196.3|	0	Uncharacterized protein CELE_T28F2.7 [Caenorhabditis elegans]
novel_mir2	NM_059708.3	-27.8	0.71076	-28.23	154	nas-36	GO:0005576,GO:0004222,GO:0008270,GO:0018996,GO:0006508,GO:0007275,	K08076|1|0.0|1274|cel:CELE_C26C6.3|astacin [EC:3.4.24.21]	gi|71980967|ref|NP_492109.2|	0	Zinc metalloproteinase nas-36 [Caenorhabditis elegans]
novel_mir2	NM_076337.2	-30.3	0.598029	-25.38	157	pqn-15	GO:0016021,	K11647|1|1.49e-30|137|cbr:CBG14390|SWI/SNF-related matrix-associated actin-dependent regulator of chromatin subfamily A member 2/4 [EC:3.6.4.-]	gi|392925812|ref|NP_508738.2|	0	Prion-like-(Q/N-rich)-domain-bearing protein [Caenorhabditis elegans]
novel_mir2	NR_072601.1	-30.2	0.01065	-26.1	153	T04C10.8	-	-	-	-	-
novel_mir2	NM_066346.4	-29	0.703559	-27.38	155	lin-36	GO:0005634,GO:0046872,GO:0003677,GO:0005515,GO:0040027,GO:0048557,	-	gi|25151296|ref|NP_498747.2|	0	Protein lin-36 [Caenorhabditis elegans]
novel_mir2	NM_001269529.1	-28.4	0.653519	-25.14	161	ZC455.1	-	-	gi|193209293|ref|NP_001123076.1|	0	Uncharacterized protein CELE_ZC455.1 [Caenorhabditis elegans]
novel_mir2	NM_171266.5	-28.2	0.138093	-25.04	146	C09E9.1	-	K09850|1|7.76e-09|56.6|gfr:102044736|Ras association domain-containing protein 1	gi|25153714|ref|NP_741315.1|	1.25535e-86	Uncharacterized protein CELE_C09E9.1 [Caenorhabditis elegans]
novel_mir2	NM_068896.3	-29.3	0.386236	-30.18	148	cdgs-1	GO:0016021,GO:0005789,GO:0004605,GO:0016024,GO:0006655,GO:0008340,GO:0000003,GO:0002119,GO:0040011,	K00981|1|0.0|928|cel:CELE_C33H5.18|phosphatidate cytidylyltransferase [EC:2.7.7.41]	gi|17539014|ref|NP_501297.1|	0	Phosphatidate cytidylyltransferase [Caenorhabditis elegans]
novel_mir2	NM_001267331.1	-30.2	0.65273	-25.38	163	mks-5	GO:0035869,GO:1904491,GO:0097500,GO:0006935,GO:0019915,GO:0022615,	K16550|1|0.0|2684|cel:CELE_C09G5.8|protein fantom	gi|392891573|ref|NP_001254260.1|	0	Protein fantom [Caenorhabditis elegans]
novel_mir2	NM_063307.4	-28.2	0.441095	-26.53	150	F10B5.2	GO:0009792,GO:0000244,	K13205|1|0.0|748|cel:CELE_F10B5.2|A1 cistron-splicing factor AAR2	gi|17533039|ref|NP_495708.1|	0	Protein AAR2 homolog [Caenorhabditis elegans]
novel_mir2	NM_001268406.1	-26.3	0.617791	-51.02	305	grsp-2	-	-	gi|392899806|ref|NP_001255335.1|	5.25928e-139	Glycine Rich Secreted Protein [Caenorhabditis elegans]
novel_mir2	NM_067046.3	-29.9	0.378075	-27.52	150	rsks-1	GO:0005737,GO:0005634,GO:0004711,GO:0005524,GO:0035556,GO:0006468,	K04688|1|0.0|1151|cel:CELE_Y47D3A.16|ribosomal protein S6 kinase beta [EC:2.7.11.1]	gi|392896679|ref|NP_499447.2|	0	Ribosomal protein S6 kinase [Caenorhabditis elegans]
novel_mir2	NM_182151.3	-38.8	0.012028	-31.97	178	alh-6	GO:0003842,GO:0004029,GO:0006537,GO:0032502,GO:0000003,GO:0040011,GO:0006561,GO:0006898,GO:0055114,	K00294|1|0.0|1016|cel:CELE_F56D12.1|1-pyrroline-5-carboxylate dehydrogenase [EC:1.2.1.88]	gi|32564151|ref|NP_871951.1|	0	ALdehyde deHydrogenase [Caenorhabditis elegans]
novel_mir2	NM_001025814.2	-38.5	0.288186	-31.72	167	unc-89	GO:0031430,GO:0004672,GO:0019902,GO:0017048,GO:0005089,GO:0005524,GO:0035023,GO:0040011,GO:0006468,GO:0010171,GO:0030241,GO:0043547,	K12567|1|0.0|1272|adf:107339449|titin [EC:2.7.11.1]	gi|71980588|ref|NP_001020985.1|	0	Muscle M-line assembly protein unc-89 [Caenorhabditis elegans]
novel_mir2	NM_072730.1	-30.8	0.039045	-30.01	155	F21F8.5	GO:0016787,	-	gi|17560026|ref|NP_505131.1|	3.95686e-79	Uncharacterized protein CELE_F21F8.5 [Caenorhabditis elegans]
novel_mir2	NM_001330946.1	-30.6	0.274721	-32.36	149	clec-121	GO:0030246,	K18408|1|4.92e-11|71.2|aqu:105313737|ATP-dependent RNA helicase TDRD9 [EC:3.6.4.13]!K20733|4|9.55e-09|63.5|mze:101485729|mesothelin	gi|17536965|ref|NP_494446.1|	0	C-type LECtin [Caenorhabditis elegans]
novel_mir2	NM_061191.3	-32.6	0.142317	-33.32	154	F32A7.4	GO:0005763,GO:0003735,GO:0008168,GO:0006412,GO:0032259,GO:0009792,	K11423|1|1.24e-22|107|smm:Smp_133910|histone-lysine N-methyltransferase SETD2 [EC:2.1.1.43]	gi|17507049|ref|NP_493592.1|	0	Uncharacterized protein CELE_F32A7.4 [Caenorhabditis elegans]
novel_mir2	NM_062094.3	-31	0.303264	-30.38	160	wht-4	GO:0016021,GO:0016887,GO:0005524,GO:0006810,	K05679|1|3.42e-91|300|ola:101161134|ATP-binding cassette, subfamily G (WHITE), member 1!K05680|4|2.84e-88|292|xma:102218329|ATP-binding cassette, subfamily G (WHITE), member 4	gi|808355238|ref|NP_494495.3|	0	WHiTe (Drosophila) related ABC transporter [Caenorhabditis elegans]
novel_mir2	NM_064041.4	-26.4	0.655533	-47.63	292	rsp-1	GO:0005634,GO:0003723,GO:0000166,GO:0000398,GO:0007283,GO:0030154,GO:0040009,GO:0040026,GO:0040011,GO:0009792,	K12893|1|0.0|601|cel:CELE_W02B12.3|splicing factor, arginine/serine-rich 4/5/6	gi|17535711|ref|NP_496442.1|	0	Probable splicing factor, arginine/serine-rich 1 [Caenorhabditis elegans]
novel_mir2	NM_065628.2	-28.5	0.400475	-26.42	154	rom-1	GO:0016021,GO:0005743,GO:0004252,GO:0040027,GO:0016485,	K02857|1|0.0|737|cel:CELE_F26F4.3|rhomboid-related protein 1/2/3 [EC:3.4.21.105]	gi|32565496|ref|NP_498029.2|	0	Rhomboid-related protein 1 [Caenorhabditis elegans]
novel_mir2	NM_001269550.1	-33.8	0.040105	-33.17	160	lurp-4	-	-	gi|392921382|ref|NP_001256478.1|	0	LU (Ly6 Urokinase plasminogen) domain Receptor-related Protein [Caenorhabditis elegans]
novel_mir2	NM_001307568.1	-29.1	0.526475	-33.21	148	Y77E11A.7	GO:0005515,GO:0009792,GO:0008340,GO:0040035,GO:0002119,GO:0040011,	-	gi|808357942|ref|NP_001294497.1|	0	Uncharacterized protein CELE_Y77E11A.7 [Caenorhabditis elegans]
novel_mir2	NM_060482.1	-29.7	0.153138	-27.09	169	F46A8.5	GO:0030246,	K10093|1|1.47e-07|55.8|tsp:Tsp_07367|galectin-9	gi|17507365|ref|NP_492883.1|	3.95595e-157	Galectin [Caenorhabditis elegans]
novel_mir2	NM_001026799.1	-28.5	0.648065	-43.81	292	C17G10.6	-	K14572|1|1.05e-09|67.8|phu:Phum_PHUM347380|midasin	gi|71982354|ref|NP_001021970.1|	0	Uncharacterized protein CELE_C17G10.6 [Caenorhabditis elegans]
novel_mir2	NM_001129283.2	-30.7	0.173459	-26.15	155	zipt-2.1	GO:0005886,GO:0016021,GO:0005385,GO:0071577,	K14709|1|0.0|670|cel:CELE_C06G8.3|solute carrier family 39 (zinc transporter), member 1/2/3	gi|193205858|ref|NP_001122755.1|	0	Uncharacterized protein CELE_C06G8.3 [Caenorhabditis elegans]
novel_mir2	NM_001038341.2	-31	0.036094	-25.91	152	T04C4.1	-	K20401|1|6.76e-66|218|cel:CELE_T04C4.1|folliculin-interacting protein 2	gi|86574957|ref|NP_001033430.1|	3.39229e-74	Uncharacterized protein CELE_T04C4.1 [Caenorhabditis elegans]
novel_mir2	NM_001129239.2	-34.7	0.265582	-33.45	160	cbp-1	GO:0005634,GO:0003712,GO:0008270,GO:0004402,GO:0006355,GO:0016573,	K04498|1|0.0|4085|cel:CELE_R10E11.1|E1A/CREB-binding protein [EC:2.3.1.48]	gi|392896227|ref|NP_001122711.2|	0	Protein cbp-1 [Caenorhabditis elegans]
novel_mir2	NM_066993.2	-36	0.08045	-28.01	159	vps-50	-	-	gi|71983277|ref|NP_499394.2|	0	VESicle-Associated [Caenorhabditis elegans]
novel_mir2	NM_001028432.2	-27.7	0.730707	-28.79	159	cha-1	GO:0005829,GO:0043005,GO:0060076,GO:0031090,GO:0043025,GO:0005886,GO:0004102,GO:0007411,GO:0008340,GO:0018991,GO:0002119,GO:0008292,	K00623|1|0.0|1316|cel:CELE_cha-1|choline O-acetyltransferase [EC:2.3.1.6]	gi|71999705|ref|NP_001023603.1|	0	Choline O-acetyltransferase [Caenorhabditis elegans]
novel_mir2	NM_061797.5	-32	0.056937	-30.85	166	C40A11.2	GO:0005515,GO:0051260,	K15074|1|1.26e-22|95.9|cbr:CBG18386|BTB/POZ domain-containing adapter for CUL3-mediated RhoA degradation protein	gi|71983817|ref|NP_494198.3|	1.41363e-155	Uncharacterized protein CELE_C40A11.2 [Caenorhabditis elegans]
novel_mir2	NM_001129210.2	-30.1	0.496219	-28.86	159	unc-103	GO:0005887,GO:0005249,GO:0007617,GO:0046662,GO:0043050,GO:0071805,GO:0040011,GO:0006937,GO:0042391,GO:0030163,	K04905|1|0.0|1542|cel:CELE_C30D11.1|potassium voltage-gated channel Eag-related subfamily H member 2!K04910|4|0.0|792|crg:105328901|potassium voltage-gated channel Eag-related subfamily H member 7	gi|193205546|ref|NP_001122682.1|	0	Uncharacterized protein CELE_C30D11.1 [Caenorhabditis elegans]
novel_mir2	NM_001029801.3	-33.3	0.236603	-29.48	165	mig-15	GO:0005737,GO:0004702,GO:0005524,GO:0018991,GO:0006898,GO:0030334,GO:0032228,GO:0040039,GO:0019915,GO:0048675,GO:0023014,GO:0033563,GO:0002119,GO:0010171,GO:0040035,	K08840|1|0.0|2201|cel:CELE_ZC504.4|TRAF2 and NCK interacting kinase [EC:2.7.11.1]	gi|72003660|ref|NP_001024972.1|	0	Serine/threonine-protein kinase mig-15 [Caenorhabditis elegans]
novel_mir2	NM_001029240.4	-28.4	0.770257	-33.78	167	nra-3	GO:0008270,	-	gi|71983619|ref|NP_001024411.1|	0	Nicotinic Receptor Associated [Caenorhabditis elegans]
novel_mir2	NM_001038308.2	-28.8	0.788626	-25.84	162	sax-7	GO:0016021,GO:0016328,GO:0032809,GO:0005913,GO:0032590,GO:0030673,GO:0030017,GO:0030506,GO:0050839,GO:0003384,GO:0042074,GO:0009792,GO:0000132,GO:0048813,	K06756|1|0.0|2316|cel:CELE_C18F3.2|neuronal cell adhesion molecule	gi|86565338|ref|NP_001033397.1|	0	Sensory AXon guidance [Caenorhabditis elegans]
novel_mir2	NM_067082.2	-26.6	0.771143	-48.87	317	Y66D12A.19	-	-	gi|392896759|ref|NP_499483.2|	0	Uncharacterized protein CELE_Y66D12A.19 [Caenorhabditis elegans]
novel_mir2	NM_001268196.1	-30.3	0.452849	-57.94	309	T28D6.5	GO:0016021,GO:0009792,GO:0040007,GO:0040035,GO:0002119,	-	gi|392896721|ref|NP_001255125.1|	0	Uncharacterized protein CELE_T28D6.5 [Caenorhabditis elegans]
novel_mir2	NM_066883.5	-27.9	0.391798	-27.28	148	ced-9	GO:0005741,GO:0012505,GO:0048471,GO:0046982,GO:0005096,GO:0042803,GO:0000422,GO:0010636,GO:0097192,GO:0008630,GO:2001243,GO:0009792,GO:1902742,GO:0030163,GO:0043547,	K20094|1|0.0|587|cel:CELE_T07C4.8|cell death protein 9	gi|17552728|ref|NP_499284.1|	0	Apoptosis regulator ced-9 [Caenorhabditis elegans]
novel_mir2	NM_067449.3	-30.7	0.592797	-26.87	166	frm-5.2	GO:0002119,GO:0040022,GO:0042127,GO:0040020,GO:0045132,GO:0008406,	K02374|1|2.79e-145|471|tsp:Tsp_03584|tyrosine-protein phosphatase non-receptor type 13	gi|808355815|ref|NP_499850.3|	0	FERM domain (protein4.1-ezrin-radixin-moesin) family [Caenorhabditis elegans]
novel_mir2	NM_001268213.1	-25.5	0.786369	-97.13	583	rsp-8	GO:0003723,GO:0000166,GO:0000398,GO:0040035,GO:0002119,GO:0040011,GO:0048477,GO:0009792,	K12897|1|0.0|561|cel:CELE_C18D11.4|transformer-2 protein	gi|392896831|ref|NP_001255142.1|	0	SR Protein (splicing factor) [Caenorhabditis elegans]
novel_mir2	NR_131656.1	-29.7	0.796826	-52.77	302	Y41E3.11	-	-	-	-	-
novel_mir2	NM_065057.1	-32.1	0.004814	-30.12	155	Y39A3CL.3	GO:0016021,GO:0006974,	-	gi|17555766|ref|NP_497458.1|	1.45362e-27	Uncharacterized protein CELE_Y39A3CL.3 [Caenorhabditis elegans]
novel_mir2	NM_001129584.1	-26.8	0.51042	-25.62	152	Y60A3A.19	GO:0016021,	K20363|1|1.05e-12|70.9|nve:NEMVE_v1g206185|protein transport protein YIP1!K12603|4|2.91e-12|71.2|phu:Phum_PHUM129580|CCR4-NOT transcription complex subunit 6 [EC:3.1.13.4]	gi|193209170|ref|NP_001123056.1|	0	Protein YIPF [Caenorhabditis elegans]
novel_mir2	NM_001267332.1	-30.2	0.583424	-25.38	163	mks-5	GO:0035869,GO:1904491,GO:0097500,GO:0006935,GO:0019915,GO:0022615,	K16550|1|0.0|2218|cel:CELE_C09G5.8|protein fantom	gi|392891573|ref|NP_001254260.1|	0	Protein fantom [Caenorhabditis elegans]
novel_mir2	NM_070374.3	-29.9	0.28265	-31.21	157	Y57G11C.31	GO:0016021,	-	gi|71999312|ref|NP_502775.2|	0	Uncharacterized protein CELE_Y57G11C.31 [Caenorhabditis elegans]
novel_mir2	NM_073125.4	-30.4	0.356193	-28.54	165	ztf-7	GO:0046872,	K07575|1|1.27e-47|176|tsp:Tsp_02810|PUA domain protein!K11436|2|2.71e-08|62.0|sasa:100195307|type I protein arginine methyltransferase [EC:2.1.1.319]	gi|17561044|ref|NP_505526.1|	0	Zinc finger putative Transcription Factor family [Caenorhabditis elegans]
novel_mir2	NM_001268440.1	-31.2	0.60359	-26.19	164	wnk-1	GO:0005829,GO:0005515,GO:0004674,GO:0005524,GO:0000122,GO:0007275,GO:0018991,GO:0032414,GO:2000021,GO:0006468,GO:0061404,GO:0050891,GO:0035556,	K08867|1|0.0|3031|cel:CELE_C46C2.1|WNK lysine deficient protein kinase [EC:2.7.11.1]	gi|392899967|ref|NP_001255369.1|	0	Serine/threonine-protein kinase WNK [Caenorhabditis elegans]
novel_mir2	NM_001047317.4	-38.8	0.009034	-31.97	178	alh-6	GO:0003842,GO:0004029,GO:0006537,GO:0032502,GO:0000003,GO:0040011,GO:0006561,GO:0006898,GO:0055114,	K00294|1|0.0|882|cel:CELE_F56D12.1|1-pyrroline-5-carboxylate dehydrogenase [EC:1.2.1.88]	gi|17534447|ref|NP_493946.1|	0	ALdehyde deHydrogenase [Caenorhabditis elegans]
novel_mir2	NM_001307786.1	-28.9	0.513975	-33.2	152	grd-6	-	-	gi|808358748|ref|NP_001294715.1|	0	GRounDhog (hedgehog-like family) [Caenorhabditis elegans]
novel_mir2	NM_060545.5	-31.9	0.771521	-51.98	317	dys-1	GO:0016014,GO:0005856,GO:0055120,GO:0042383,GO:0005277,GO:0008270,GO:0003779,GO:0045214,GO:0015870,GO:0046716,GO:0043056,GO:0040013,GO:0006836,GO:0007626,GO:0072488,GO:0040017,GO:0032224,	K10366|1|7.79e-174|578|gfr:102033021|dystrophin	gi|17506447|ref|NP_492946.1|	0	Dystrophin-1 [Caenorhabditis elegans]
novel_mir2	NM_001322718.1	-29.1	0.073182	-26.04	152	F59H6.15	-	-	gi|17534621|ref|NP_494150.1|	6.94267e-62	MATH (meprin-associated Traf homology) domain containing [Caenorhabditis elegans]
novel_mir2	NM_001307369.1	-28.5	0.645838	-61.56	326	unc-33	GO:0005737,GO:0043005,GO:0016810,GO:0031005,GO:0007411,GO:0048675,GO:0008152,	K07529|1|2.74e-107|340|tru:101077016|dihydropyrimidinase-like 5!K01464|2|4.37e-107|339|apla:101796480|dihydropyrimidinase [EC:3.5.2.2]	gi|86575075|ref|NP_001033438.1|	0	Protein unc-33 [Caenorhabditis elegans]
novel_mir2	NM_065236.1	-27	0.486873	-68.04	445	T20B6.3	-	-	gi|17555156|ref|NP_497637.1|	5.15508e-143	Uncharacterized protein CELE_T20B6.3 [Caenorhabditis elegans]
novel_mir2	NM_073621.3	-30.3	0.455516	-25.75	150	clh-6	GO:0016021,GO:0005247,GO:1903959,GO:0006821,	K05016|1|0.0|1635|cel:CELE_R07B7.1|chloride channel 7	gi|17559050|ref|NP_506022.1|	0	Chloride channel protein [Caenorhabditis elegans]
novel_mir2	NM_001267985.1	-30.5	0.402744	-27.36	148	cdk-12	GO:0005694,GO:0005634,GO:0008353,GO:0005524,GO:0004693,GO:0006468,GO:0051726,GO:0040035,GO:0010171,GO:0002119,GO:0040011,GO:0006898,GO:0009792,	K08819|1|0.0|1509|cel:CELE_B0285.1|cyclin-dependent kinase 12/13 [EC:2.7.11.22 2.7.11.23]	gi|392894690|ref|NP_001254914.1|	0	Cyclin-dependent kinase 12 [Caenorhabditis elegans]
novel_mir2	NR_132582.1	-32.6	0.029311	-30.42	151	H12I13.5	-	-	-	-	-
novel_mir2	NM_075430.3	-28.8	0.475715	-25.76	156	M162.5	GO:0016021,GO:0022857,GO:0055085,GO:0006820,	K08193|1|7.11e-36|144|bim:100747948|MFS transporter, ACS family, solute carrier family 17 (sodium-dependent inorganic phosphate cotransporter), other!K12301|4|3.71e-34|138|bfo:BRAFLDRAFT_274979|MFS transporter, ACS family, solute carrier family 17 (sodium-dependent inorganic phosphate cotransporter), member 5	gi|17562692|ref|NP_507831.1|	0	Uncharacterized protein CELE_M162.5 [Caenorhabditis elegans]
novel_mir2	NM_001307307.1	-32.4	0.102265	-31.58	177	npp-8	GO:0044611,GO:0017056,GO:0036228,GO:0000972,GO:0006606,GO:0040035,GO:0032940,GO:0006405,GO:0019915,GO:0002119,GO:0009792,	K14312|1|1.57e-135|420|cel:CELE_Y41D4B.19|nuclear pore complex protein Nup155	gi|808357420|ref|NP_001294236.1|	0	Nuclear Pore complex Protein [Caenorhabditis elegans]
novel_mir2	NM_001268441.1	-31.2	0.635135	-26.19	164	wnk-1	GO:0005829,GO:0005515,GO:0004674,GO:0005524,GO:0000122,GO:0007275,GO:0018991,GO:0032414,GO:2000021,GO:0006468,GO:0061404,GO:0050891,GO:0035556,	K08867|1|0.0|3515|cel:CELE_C46C2.1|WNK lysine deficient protein kinase [EC:2.7.11.1]	gi|392899969|ref|NP_001255370.1|	0	Serine/threonine-protein kinase WNK [Caenorhabditis elegans]
novel_mir2	NM_062165.3	-33.1	0.156956	-29.81	158	clec-125	-	-	gi|392889586|ref|NP_494566.2|	0	C-type LECtin [Caenorhabditis elegans]
novel_mir2	NM_001028329.2	-34.6	0.069583	-29.77	170	Y54G2A.26	-	-	gi|71998022|ref|NP_001023500.1|	0	Uncharacterized protein CELE_Y54G2A.26 [Caenorhabditis elegans]
novel_mir2	NM_001306525.1	-38.5	0.051075	-31.72	167	unc-89	GO:0031430,GO:0004672,GO:0019902,GO:0017048,GO:0005089,GO:0005524,GO:0035023,GO:0040011,GO:0006468,GO:0010171,GO:0030241,GO:0043547,	K08809|1|9.01e-60|232|sko:100378688|striated muscle-specific serine/threonine protein kinase [EC:2.7.11.1]	gi|71980588|ref|NP_001020985.1|	0	Muscle M-line assembly protein unc-89 [Caenorhabditis elegans]
novel_mir2	NM_001307601.1	-36.8	0.059131	-35.02	174	Y38F2AR.12	GO:0016787,GO:0008152,	K01469|1|0.0|1954|cel:CELE_Y38F2AR.12|5-oxoprolinase (ATP-hydrolysing) [EC:3.5.2.9]	gi|808355898|ref|NP_001076725.2|	0	Uncharacterized protein CELE_Y38F2AR.12 [Caenorhabditis elegans]
novel_mir2	NM_064025.3	-30.8	0.211988	-30.13	167	B0491.1	GO:0016021,GO:0016758,GO:0006506,	K05284|1|0.0|852|cel:CELE_B0491.1|phosphatidylinositol glycan, class M [EC:2.4.1.-]	gi|17531359|ref|NP_496426.1|	0	Uncharacterized protein CELE_B0491.1 [Caenorhabditis elegans]
novel_mir2	NM_001047617.2	-29	0.325959	-26.42	158	C14C10.2	GO:0040011,	-	gi|115533120|ref|NP_001041082.1|	0	Uncharacterized protein CELE_C14C10.2 [Caenorhabditis elegans]
novel_mir2	NM_171624.5	-28.3	0.645283	-27.07	151	vpat-1	GO:0016021,GO:0055085,	K08155|1|3.16e-14|80.9|hro:HELRODRAFT_81350|MFS transporter, DHA1 family, solute carrier family 18 (vesicular amine transporter), member 1/2!K14636|2|3.96e-14|80.9|mdo:103092068|MFS transporter, DHA1 family, solute carrier family 18 (vesicular acetylcholine transporter), member 3	gi|193210343|ref|NP_741716.2|	0	Uncharacterized protein CELE_F55A4.8 [Caenorhabditis elegans]
novel_mir2	NM_068486.3	-29.2	0.51374	-54.24	319	pck-3	GO:0005829,GO:0005525,GO:0004611,GO:0016301,GO:0006094,GO:0016310,GO:0000003,GO:0019915,	K01596|1|1.34e-63|226|loa:LOAG_07217|phosphoenolpyruvate carboxykinase (GTP) [EC:4.1.1.32]	gi|17540956|ref|NP_500887.1|	0	Phosphoenolypyruvate CarboxyKinase [Caenorhabditis elegans]
novel_mir2	NM_073810.3	-28.5	0.553383	-26.82	154	ugt-15	GO:0043231,GO:0016021,GO:0015020,GO:0009813,GO:0052696,	K00699|1|0.0|1110|cel:CELE_C44H9.1|glucuronosyltransferase [EC:2.4.1.17]	gi|17558608|ref|NP_506211.1|	0	UDP-glucuronosyltransferase [Caenorhabditis elegans]
novel_mir2	NR_131658.1	-30.2	0.522196	-28.57	163	Y105C5A.15	-	-	-	-	-
novel_mir2	NM_001026496.2	-28.7	0.510084	-34.43	159	nhr-85	GO:0005634,GO:0008270,GO:0043565,GO:0003707,GO:0003700,GO:0043401,GO:0043053,GO:0006355,	K08701|1|9.08e-55|203|crg:105328274|nuclear receptor subfamily 1 group D member 3	gi|71992375|ref|NP_001021667.1|	0	Nuclear hormone receptor family member nhr-85 [Caenorhabditis elegans]
novel_mir2	NM_001268197.1	-31	0.170173	-31.67	158	T28D6.6	GO:0005525,GO:0040035,GO:0009792,GO:0002119,GO:0040007,	K06944|1|1.26e-150|433|pxy:105380410|uncharacterized protein	gi|392896725|ref|NP_001255126.1|	0	Uncharacterized protein CELE_T28D6.6 [Caenorhabditis elegans]
novel_mir2	NM_001270329.1	-31.9	0.0928	-25.44	158	kin-20	GO:0005737,GO:0005634,GO:0004674,GO:0005524,GO:0018105,GO:0008360,GO:0000003,GO:0048511,GO:0010171,GO:0016055,GO:0002119,GO:0040011,GO:0006897,GO:0009792,GO:0040018,	K08959|1|0.0|521|bmy:Bm1_37175|casein kinase 1, delta [EC:2.7.11.1]!K08960|2|0.0|516|tru:101068125|casein kinase 1, epsilon [EC:2.7.11.1]	gi|71990373|ref|NP_510533.3|	0	Casein kinase I isoform delta [Caenorhabditis elegans]
novel_mir2	NM_001307103.1	-31.2	0.637025	-26.19	164	wnk-1	GO:0005829,GO:0005515,GO:0004674,GO:0005524,GO:0000122,GO:0007275,GO:0018991,GO:0032414,GO:2000021,GO:0006468,GO:0061404,GO:0050891,GO:0035556,	K08867|1|0.0|3766|cel:CELE_C46C2.1|WNK lysine deficient protein kinase [EC:2.7.11.1]	gi|808357008|ref|NP_001294032.1|	0	Serine/threonine-protein kinase WNK [Caenorhabditis elegans]
novel_mir2	NM_060851.4	-34.5	0.334219	-58.28	314	pad-1	GO:0015031,GO:0007275,	K19476|1|1.29e-60|237|tsp:Tsp_05230|vacuolar protein sorting-associated protein IST1	gi|71993500|ref|NP_493252.3|	0	Protein pad-1 [Caenorhabditis elegans]
novel_mir2	NM_063820.1	-34.1	0.036971	-25.8	161	M02G9.3	-	-	gi|17535161|ref|NP_496221.1|	0	Uncharacterized protein CELE_M02G9.3 [Caenorhabditis elegans]
novel_mir2	NM_070459.4	-29.5	0.482148	-50.95	311	ntl-11	-	-	gi|32565995|ref|NP_502860.2|	0	NOT-Like (yeast CCR4/NOT complex component) [Caenorhabditis elegans]
novel_mir2	NM_069824.3	-29.4	0.486902	-27.96	162	gem-4	-	K11348|1|4.13e-08|62.0|apla:101800649|bromodomain and PHD finger-containing protein 1!K10591|2|8.79e-07|57.8|nvi:100115069|E3 ubiquitin-protein ligase NEDD4 [EC:2.3.2.26]	gi|17542326|ref|NP_502225.1|	0	Gon-2 Extragenic Modifier [Caenorhabditis elegans]
novel_mir2	NM_069348.5	-31.2	0.446108	-30.02	150	pis-1	GO:0040018,	K14972|1|0.0|2208|cel:CELE_T13F2.3|PAX-interacting protein 1	gi|17542400|ref|NP_501749.1|	0	PIS (Pax-2, IA-1/6, Smad-2 interacting protein) homolog [Caenorhabditis elegans]
novel_mir2	NM_001083251.1	-34.2	0.006165	-34.89	170	Y116A8C.49	-	-	gi|133901890|ref|NP_001076720.1|	4.7564e-64	Uncharacterized protein CELE_Y116A8C.49 [Caenorhabditis elegans]
novel_mir2	NM_001269549.1	-33.8	0.055232	-33.17	160	lurp-4	-	-	gi|392921382|ref|NP_001256478.1|	0	LU (Ly6 Urokinase plasminogen) domain Receptor-related Protein [Caenorhabditis elegans]
novel_mir2	NM_001129324.2	-31.7	0.516161	-56.31	307	klp-12	GO:0005871,GO:0003777,GO:0008017,GO:0016765,GO:0005524,GO:0016887,GO:0007018,GO:0006486,GO:0009792,	K10395|1|0.0|3271|cel:CELE_T01G1.1|kinesin family member 4/21/27	gi|193206546|ref|NP_001122796.1|	0	Kinesin-like protein [Caenorhabditis elegans]
novel_mir2	NM_001129589.2	-30.5	0.259204	-25.44	155	Y69H2.15	-	-	gi|392922809|ref|NP_001123061.2|	0	Uncharacterized protein CELE_Y69H2.15 [Caenorhabditis elegans]
novel_mir2	NM_001129603.2	-28.4	0.65238	-25.14	161	ZC455.1	-	-	gi|193209291|ref|NP_001123075.1|	0	Uncharacterized protein CELE_ZC455.1 [Caenorhabditis elegans]
novel_mir2	NM_171248.3	-27.9	0.466222	-26.41	149	K11H12.8	GO:0016021,	K06890|1|2.36e-06|53.9|api:100165572|uncharacterized protein	gi|25145606|ref|NP_741296.1|	0	Uncharacterized protein CELE_K11H12.8 [Caenorhabditis elegans]
novel_mir2	NM_067970.1	-27.5	0.569514	-25.85	148	nstp-6	GO:0000139,GO:0016021,GO:0005351,GO:0000003,GO:0008643,GO:0015992,	K15272|1|0.0|737|cel:CELE_B0212.4|solute carrier family 35 (UDP-sugar transporter), member A1/2/3	gi|17538248|ref|NP_500371.1|	0	Nucleotide Sugar TransPorter family [Caenorhabditis elegans]
novel_mir2	NM_070759.4	-33.8	0.046727	-33.86	157	kin-33	GO:0004674,GO:0005524,GO:0006468,GO:0007369,GO:0033314,	K02216|1|2.18e-81|259|cel:CELE_Y39H10A.7|serine/threonine-protein kinase Chk1 [EC:2.7.11.1]	gi|17559174|ref|NP_503160.1|	0	protein KINase [Caenorhabditis elegans]
novel_mir2	NM_065721.4	-28.2	0.512347	-25.44	155	gro-1	GO:0005739,GO:0005634,GO:0046872,GO:0052381,GO:0005524,GO:0008340,GO:0000003,GO:0002119,GO:0006400,GO:0040014,	K00791|1|0.0|890|cel:CELE_ZC395.6|tRNA dimethylallyltransferase [EC:2.5.1.75]	gi|25144712|ref|NP_498122.2|	0	Uncharacterized protein CELE_ZC395.6 [Caenorhabditis elegans]
novel_mir2	NM_076344.3	-28.5	0.292652	-27.61	155	F14H12.3	-	K16857|1|3.52e-22|100|hgl:101701581|thrombospondin 1	gi|17551708|ref|NP_508745.1|	3.15497e-179	Uncharacterized protein CELE_F14H12.3 [Caenorhabditis elegans]
novel_mir2	NM_001268193.1	-30.3	0.4443	-57.94	309	T28D6.5	GO:0016021,GO:0009792,GO:0040007,GO:0040035,GO:0002119,	-	gi|392896713|ref|NP_001255122.1|	0	Uncharacterized protein CELE_T28D6.5 [Caenorhabditis elegans]
novel_mir2	NM_069856.5	-31.3	0.054975	-28.46	152	ZK822.2	-	-	gi|71999815|ref|NP_502257.2|	7.54888e-122	Uncharacterized protein CELE_ZK822.2 [Caenorhabditis elegans]
novel_mir2	NM_001270330.1	-31.9	0.093202	-25.44	158	kin-20	GO:0005737,GO:0005634,GO:0004674,GO:0005524,GO:0018105,GO:0008360,GO:0000003,GO:0048511,GO:0010171,GO:0016055,GO:0002119,GO:0040011,GO:0006897,GO:0009792,GO:0040018,	K08959|1|0.0|521|bmy:Bm1_37175|casein kinase 1, delta [EC:2.7.11.1]!K08960|2|0.0|514|tru:101068125|casein kinase 1, epsilon [EC:2.7.11.1]	gi|71990390|ref|NP_001024670.1|	0	Casein kinase I isoform delta [Caenorhabditis elegans]
novel_mir2	NM_001268447.1	-31.2	0.625106	-26.19	164	wnk-1	GO:0005829,GO:0005515,GO:0004674,GO:0005524,GO:0000122,GO:0007275,GO:0018991,GO:0032414,GO:2000021,GO:0006468,GO:0061404,GO:0050891,GO:0035556,	K08867|1|0.0|3414|cel:CELE_C46C2.1|WNK lysine deficient protein kinase [EC:2.7.11.1]	gi|392899983|ref|NP_001255376.1|	0	Serine/threonine-protein kinase WNK [Caenorhabditis elegans]
novel_mir2	NM_001267482.1	-35	0.031099	-30.52	166	Y51H1A.2	-	K19330|1|4.44e-38|149|sko:100377422|run domain Beclin-1 interacting and cysteine-rich containing protein	gi|392892359|ref|NP_001254408.1|	0	Uncharacterized protein CELE_Y51H1A.2 [Caenorhabditis elegans]
novel_mir2	NM_001267407.1	-33.1	0.334353	-29.81	158	pqn-87	-	K14454|1|1.04e-41|173|tsp:Tsp_11254|aspartate aminotransferase, cytoplasmic [EC:2.6.1.1]!K11838|2|1.94e-33|146|bmor:101739310|ubiquitin carboxyl-terminal hydrolase 7 [EC:3.4.19.12]	gi|392892017|ref|NP_001254336.1|	0	Prion-like-(Q/N-rich)-domain-bearing protein [Caenorhabditis elegans]
novel_mir2	NM_061563.1	-28.1	0.067194	-26.32	146	Y51H7C.8	-	-	gi|17537385|ref|NP_493964.1|	2.29538e-44	Uncharacterized protein CELE_Y51H7C.8 [Caenorhabditis elegans]
novel_mir2	NR_069270.1	-33.5	0.002059	-29.74	156	B0024.17	-	-	-	-	-
novel_mir2	NM_060976.4	-30.4	0.541832	-30.19	164	glp-4	GO:0005829,GO:0004832,GO:0002161,GO:0005524,GO:0006898,GO:0040018,GO:0006450,GO:0006915,GO:0018996,GO:0019915,GO:0009792,GO:0006438,GO:0002119,GO:0007281,	K01873|1|0.0|2184|cel:CELE_Y87G2A.5|valyl-tRNA synthetase [EC:6.1.1.9]	gi|17510661|ref|NP_493377.1|	0	Valine--tRNA ligase [Caenorhabditis elegans]
novel_mir2	NM_069347.1	-31.2	0.446742	-30.02	150	pis-1	GO:0040018,	K14972|1|0.0|2203|cel:CELE_T13F2.3|PAX-interacting protein 1	gi|17542402|ref|NP_501748.1|	0	PIS (Pax-2, IA-1/6, Smad-2 interacting protein) homolog [Caenorhabditis elegans]
novel_mir2	NM_001028241.2	-32.7	0.117588	-29.61	150	hlh-30	GO:0005737,GO:0005634,GO:0000981,GO:0046983,GO:0010506,GO:0050829,GO:0008340,GO:0045944,GO:0000003,GO:0019915,GO:0050830,	K09455|1|2.90e-29|123|dre:30080|microphthalmia-associated transcription factor!K09105|2|8.88e-29|122|ola:101166296|transcription factor E3	gi|71994962|ref|NP_001023412.1|	0	Helix Loop Helix [Caenorhabditis elegans]
novel_mir2	NM_001306721.1	-30.1	0.525398	-54.06	312	unc-103	GO:0005887,GO:0005249,GO:0007617,GO:0046662,GO:0043050,GO:0071805,GO:0040011,GO:0006937,GO:0042391,GO:0030163,	K04905|1|0.0|1545|cel:CELE_C30D11.1|potassium voltage-gated channel Eag-related subfamily H member 2!K04910|4|0.0|795|crg:105328901|potassium voltage-gated channel Eag-related subfamily H member 7	gi|808355732|ref|NP_001293650.1|	0	Uncharacterized protein CELE_C30D11.1 [Caenorhabditis elegans]
novel_mir2	NM_066632.4	-32.2	0.232943	-28.62	163	tax-4	GO:0005887,GO:0097543,GO:0030425,GO:0005622,GO:0005222,GO:0005249,GO:0005223,GO:0030553,GO:0048609,GO:0042391,GO:0007602,GO:0007199,GO:0050907,GO:0009454,GO:0040010,GO:0008340,GO:0040040,GO:0045944,GO:0042048,GO:0009408,GO:0010754,GO:0030516,GO:0055093,GO:0071805,GO:0019722,GO:0043052,GO:0003031,	K04950|1|0.0|1526|cel:CELE_ZC84.2|cyclic nucleotide gated channel alpha 3	gi|17556791|ref|NP_499033.1|	0	Cyclic nucleotide-gated cation channel [Caenorhabditis elegans]
novel_mir2	NM_074436.2	-35.8	0.032758	-30.62	155	fbxa-104	-	-	gi|212646530|ref|NP_506837.2|	0	F-box A protein [Caenorhabditis elegans]
novel_mir2	NM_001306713.1	-27.2	0.618129	-28.23	159	let-805	GO:0030056,GO:0016021,GO:0009792,GO:0002119,GO:0031581,GO:0018996,GO:0000003,GO:0040011,GO:0006898,	-	gi|808355716|ref|NP_001293642.1|	0	Uncharacterized protein CELE_H19M22.2 [Caenorhabditis elegans]
novel_mir2	NM_076047.4	-27.4	0.562962	-25.08	161	R04B3.2	GO:0005764,GO:0003948,GO:0008233,GO:0006508,	K01444|1|0.0|753|cel:CELE_R04B3.2|N4-(beta-N-acetylglucosaminyl)-L-asparaginase [EC:3.5.1.26]	gi|17569239|ref|NP_508448.1|	0	Glycosylasparaginase beta chain [Caenorhabditis elegans]
novel_mir2	NM_063923.5	-26.4	0.733532	-25.89	146	npp-19	GO:0044613,GO:0044615,GO:0005487,GO:0005543,GO:0000166,GO:0003697,GO:0006999,GO:0006607,GO:0000003,GO:0006355,GO:0009792,GO:0051028,	K14313|1|0.0|769|cel:CELE_R06F6.5|nuclear pore complex protein Nup53	gi|17535509|ref|NP_496324.1|	0	Nucleoporin NUP53 [Caenorhabditis elegans]
novel_mir2	NM_001047618.2	-29	0.304497	-26.42	158	C14C10.2	GO:0040011,	-	gi|115533122|ref|NP_001041083.1|	0	Uncharacterized protein CELE_C14C10.2 [Caenorhabditis elegans]
novel_mir2	NR_050451.1	-28.2	0.21299	-31.67	151	F52F12.18	-	-	-	-	-
novel_mir2	NM_001268924.1	-29.7	0.794158	-52.77	302	Y41E3.11	GO:0009792,GO:0002119,GO:0042127,GO:0007281,GO:0040020,GO:0040011,GO:0019915,	K15047|1|5.34e-57|219|obi:106882998|heterogeneous nuclear ribonucleoprotein U-like protein 1	gi|392901954|ref|NP_001255853.1|	0	Uncharacterized protein CELE_Y41E3.11 [Caenorhabditis elegans]
novel_mir2	NM_001268443.1	-31.2	0.635324	-26.19	164	wnk-1	GO:0005829,GO:0005515,GO:0004674,GO:0005524,GO:0000122,GO:0007275,GO:0018991,GO:0032414,GO:2000021,GO:0006468,GO:0061404,GO:0050891,GO:0035556,	K08867|1|0.0|3519|cel:CELE_C46C2.1|WNK lysine deficient protein kinase [EC:2.7.11.1]	gi|392899973|ref|NP_001255372.1|	0	Serine/threonine-protein kinase WNK [Caenorhabditis elegans]
novel_mir2	NM_058943.5	-32.4	0.169816	-29.97	157	acin-1	GO:0003676,GO:0000166,GO:0009792,GO:0030334,GO:0035262,	K12875|1|0.0|1151|cel:CELE_C43E11.1|apoptotic chromatin condensation inducer in the nucleus	gi|17505983|ref|NP_491344.1|	0	ACINus (mammalian Apoptotic Chromatin condensation Inducer in the Nucleus) homolog [Caenorhabditis elegans]
novel_mir2	NM_001038337.1	-28.8	0.195463	-25.91	155	R05C11.4	GO:0016021,	-	gi|86574910|ref|NP_001033426.1|	1.34593e-145	Uncharacterized protein CELE_R05C11.4 [Caenorhabditis elegans]
novel_mir2	NR_138528.1	-28.9	0.526708	-25.39	155	Y69A2AR.1	-	-	-	-	-
novel_mir2	NM_001347272.1	-28.9	0.337251	-50.38	292	grl-23	-	-	gi|392921183|ref|NP_001256431.1|	0	GRound-Like (grd related) [Caenorhabditis elegans]
novel_mir2	NM_001268984.1	-33.7	0.158036	-33.06	158	Y116A8C.13	GO:0005524,GO:0033554,GO:0009792,	K10877|1|0.0|1727|cel:CELE_Y116A8C.13|DNA repair and recombination protein RAD54B [EC:3.6.4.-]	gi|392902165|ref|NP_001255913.1|	0	Uncharacterized protein CELE_Y116A8C.13 [Caenorhabditis elegans]
novel_mir2	NM_001026092.4	-27.5	0.489164	-25.85	148	nstp-6	GO:0000139,GO:0016021,GO:0005351,GO:0000003,GO:0008643,GO:0015992,	K15272|1|0.0|642|cel:CELE_B0212.4|solute carrier family 35 (UDP-sugar transporter), member A1/2/3	gi|17538248|ref|NP_500371.1|	0	Nucleotide Sugar TransPorter family [Caenorhabditis elegans]
novel_mir2	NM_065487.5	-27.7	0.597722	-26.27	159	R07E5.6	-	-	gi|17554502|ref|NP_497888.1|	0	Uncharacterized protein CELE_R07E5.6 [Caenorhabditis elegans]
novel_mir2	NM_001038258.3	-32.7	0.13323	-30.85	167	madf-11	GO:0000003,	-	gi|86562654|ref|NP_001033347.1|	0	MADF domain transcription factor [Caenorhabditis elegans]
novel_mir2	NM_001276730.1	-29.2	0.383844	-50.65	309	Y52E8A.6	GO:0016021,	K16600|1|3.45e-09|63.9|gga:421566|tubulin polyglutamylase TTLL2 [EC:6.-.-.-]	gi|453231757|ref|NP_001263659.1|	0	Uncharacterized protein CELE_Y52E8A.6 [Caenorhabditis elegans]
novel_mir2	NM_066118.3	-29.9	0.637612	-27.11	166	panl-2	GO:0031251,GO:0000932,GO:0003676,GO:0004535,GO:0000289,GO:0090503,	K12571|1|0.0|2367|cel:CELE_F31E3.4|PAB-dependent poly(A)-specific ribonuclease subunit 2 [EC:3.1.13.4]	gi|17553242|ref|NP_498519.1|	0	PAN (PolyA-specific riboNucLease) subunit [Caenorhabditis elegans]
novel_mir2	NM_001268925.1	-29.7	0.58827	-52.77	302	Y41E3.11	GO:0009792,GO:0002119,GO:0042127,GO:0007281,GO:0040020,GO:0040011,GO:0019915,	K15047|1|1.10e-58|221|obi:106882998|heterogeneous nuclear ribonucleoprotein U-like protein 1	gi|392901954|ref|NP_001255853.1|	0	Uncharacterized protein CELE_Y41E3.11 [Caenorhabditis elegans]
novel_mir2	NM_001267159.1	-29	0.479322	-57.12	304	gpa-11	GO:0005834,GO:0004871,GO:0046872,GO:0031683,GO:0003924,GO:0001664,GO:0005525,GO:0008340,GO:0007210,GO:0008152,GO:0007188,	K04640|1|0.0|667|cbr:CBG21947|guanine nucleotide-binding protein subunit alpha, other!K04630|2|1.29e-85|273|spu:414054|guanine nucleotide-binding protein G(i) subunit alpha!K04534|3|5.19e-85|271|hro:HELRODRAFT_95386|guanine nucleotide-binding protein G(o) subunit alpha!K19729|5|2.65e-84|270|asn:102384042|guanine nucleotide-binding protein G(t) subunit alpha 3	gi|392889730|ref|NP_001254088.1|	0	Guanine nucleotide-binding protein alpha-11 subunit [Caenorhabditis elegans]
novel_mir2	NM_001307388.1	-25.8	0.756269	-27.57	160	egrh-3	GO:0003676,GO:0046872,	K09203|1|4.27e-32|129|spu:100892559|early growth response protein 1!K12498|2|1.43e-31|128|lcm:102345999|early growth response protein 4	gi|808357582|ref|NP_001294317.1|	0	EGR (Early Growth factor Response factor) Homolog [Caenorhabditis elegans]
novel_mir2	NM_001129604.2	-28.4	0.732637	-25.14	161	ZC455.1	-	-	gi|193209293|ref|NP_001123076.1|	0	Uncharacterized protein CELE_ZC455.1 [Caenorhabditis elegans]
novel_mir2	NM_058561.5	-32.8	0.213384	-29.37	156	mcm-4	GO:0042555,GO:0005634,GO:0003678,GO:0003677,GO:0005524,GO:0043652,GO:0032508,GO:0007399,GO:0002119,GO:0006270,GO:0040011,GO:0006997,GO:0009792,GO:0008406,	K02212|1|0.0|1716|cel:CELE_Y39G10AR.14|DNA replication licensing factor MCM4 [EC:3.6.4.12]	gi|17508417|ref|NP_490962.1|	0	yeast MCM (licensing factor) related [Caenorhabditis elegans]
novel_mir2	NM_001347293.1	-28.5	0.628806	-27.77	152	zyg-8	GO:0005737,GO:0005813,GO:0005876,GO:0000922,GO:0008017,GO:0004674,GO:0005524,GO:0007026,GO:0040011,GO:0007020,GO:0040001,GO:0009792,GO:0006468,GO:0010171,GO:0035556,	K08805|1|0.0|1358|cel:CELE_Y79H2A.11|doublecortin-like kinase 1/2 [EC:2.7.11.1]	gi|25144034|ref|NP_499571.2|	0	Serine/threonine-protein kinase zyg-8 [Caenorhabditis elegans]
novel_mir2	NM_001027132.3	-31.8	0.097045	-30.88	165	mmaa-1	GO:0005739,GO:0005524,GO:0003924,GO:0005525,GO:0009236,GO:0009792,	K07588|1|0.0|614|cel:CELE_T02G5.13|LAO/AO transport system kinase [EC:2.7.-.-]	gi|71994271|ref|NP_001022302.1|	0	Methylmalonic aciduria type A homolog, mitochondrial [Caenorhabditis elegans]
novel_mir2	NM_001306919.1	-33.9	0.190856	-31.06	156	kcc-1	GO:0016021,GO:0015379,GO:0022820,GO:1902476,GO:0007268,GO:0071805,GO:0040011,GO:0009792,	K14427|1|0.0|2214|cel:CELE_R13A1.2|solute carrier family 12 (potassium/chloride transporter), member 4/5/6	gi|808356636|ref|NP_001293846.1|	0	K+/Cl-Cotransporter [Caenorhabditis elegans]
novel_mir2	NM_071382.6	-29.2	0.43197	-58.7	317	ifc-1	GO:0005737,GO:0005882,GO:0005198,GO:0009792,GO:0010171,GO:0002119,	K18585|1|0.0|1008|cel:CELE_F37B4.2|intermediate filament protein if	gi|17562038|ref|NP_503783.1|	0	Intermediate filament protein ifc-1 [Caenorhabditis elegans]
novel_mir2	NM_069648.2	-30.3	0.271731	-26.9	154	F13H10.5	GO:0016021,GO:0003824,GO:0008152,	K08743|1|4.38e-46|169|xtr:100422805|ectonucleotide pyrophosphatase/phosphodiesterase family member 6 [EC:3.1.4.-]	gi|71986535|ref|NP_502049.2|	0	Uncharacterized protein CELE_F13H10.5 [Caenorhabditis elegans]
novel_mir2	NM_064064.6	-34.5	0.062123	-33.66	160	F54D5.12	GO:0050660,GO:0016614,GO:0055114,	K00102|1|2.65e-40|156|isc:IscW_ISCW013290|D-lactate dehydrogenase (cytochrome) [EC:1.1.2.4]	gi|17534361|ref|NP_496465.1|	0	Uncharacterized protein CELE_F54D5.12 [Caenorhabditis elegans]
novel_mir2	NM_077171.6	-33.5	0.189229	-27.09	165	apa-2	GO:0030131,GO:0045334,GO:0036062,GO:0008565,GO:0032794,GO:0008022,GO:0010171,GO:0040011,GO:0006898,GO:0006886,GO:0009792,	K11824|1|0.0|1923|cel:CELE_T20B5.1|AP-2 complex subunit alpha	gi|17569875|ref|NP_509572.1|	0	AdaPtin, Alpha chain (clathrin associated complex) [Caenorhabditis elegans]
novel_mir2	NM_072134.4	-27.3	0.763192	-26.95	147	grd-9	GO:0018996,GO:0040018,GO:0040011,	-	gi|71982675|ref|NP_504535.2|	0	GRounDhog (hedgehog-like family) [Caenorhabditis elegans]
novel_mir2	NM_070959.4	-32.7	0.118796	-30.88	165	unc-34	GO:0030054,GO:0032433,GO:0031252,GO:0005737,GO:0005102,GO:0016477,GO:0048675,GO:0031103,GO:0008045,GO:0033563,GO:0040017,GO:0035262,	K06274|1|3.69e-20|98.2|crg:105320101|vasodilator-stimulated phosphoprotein!K05746|4|5.19e-19|94.7|tru:101076998|enabled	gi|392918266|ref|NP_503360.4|	0	Uncharacterized protein CELE_Y50D4C.1 [Caenorhabditis elegans]
novel_mir2	NR_056787.1	-25.1	0.22955	-27.34	151	F35G2.11	-	-	-	-	-
novel_mir2	NM_001027798.1	-28.5	0.507266	-61.05	328	uaf-1	GO:0071004,GO:0016607,GO:0089701,GO:0000243,GO:0005515,GO:0000166,GO:0030628,GO:0008187,GO:0008340,GO:0042127,GO:0048589,GO:0000381,GO:0040020,GO:0000389,GO:0009792,GO:0002119,GO:0007281,GO:0040022,GO:0010172,GO:0040035,	K12837|1|0.0|980|cel:CELE_Y92C3B.2|splicing factor U2AF 65 kDa subunit	gi|71996485|ref|NP_001022969.1|	0	Splicing factor U2AF 65 kDa subunit [Caenorhabditis elegans]
novel_mir2	NM_001129057.2	-36	0.089409	-35.17	178	catp-1	GO:0043231,GO:0005887,GO:0046872,GO:0019829,GO:0005524,GO:0098655,GO:0040024,GO:0008152,	K01539|1|0.0|2095|cel:CELE_Y105E8A.12|sodium/potassium-transporting ATPase subunit alpha [EC:3.6.3.9]!K01541|5|2.15e-155|492|mdo:100023029|H+/K+-exchanging ATPase [EC:3.6.3.10]	gi|193203356|ref|NP_001122529.1|	0	Cation transporting ATPase [Caenorhabditis elegans]
novel_mir2	NM_001313080.1	-32.8	0.097324	-31.22	174	arid-1	GO:0017053,GO:0005634,GO:0044212,GO:0006357,	-	gi|922580870|ref|NP_001300005.1|	0	ARID (AT-rich Interactive Domain-containing protein) homolog [Caenorhabditis elegans]
novel_mir2	NR_002425.1	-35.7	0.074176	-35.08	166	eat-20	-	-	-	-	-
novel_mir2	NM_075105.3	-27.4	0.796464	-28.06	152	tcc-1	GO:0016021,GO:0005789,	-	gi|17566052|ref|NP_507506.1|	0	Transmembrane and Coiled-Coil protein [Caenorhabditis elegans]
novel_mir2	NR_070739.1	-35.8	0.000604	-33.59	173	F35A5.11	-	-	-	-	-
novel_mir2	NM_001307105.1	-31.2	0.636459	-26.19	164	wnk-1	GO:0005829,GO:0005515,GO:0004674,GO:0005524,GO:0000122,GO:0007275,GO:0018991,GO:0032414,GO:2000021,GO:0006468,GO:0061404,GO:0050891,GO:0035556,	K08867|1|0.0|3753|cel:CELE_C46C2.1|WNK lysine deficient protein kinase [EC:2.7.11.1]	gi|808357012|ref|NP_001294034.1|	0	Serine/threonine-protein kinase WNK [Caenorhabditis elegans]
novel_mir2	NM_001269204.1	-35	0.159202	-33.68	168	ZK287.4	GO:0004867,GO:0010951,	K06238|1|3.21e-19|100|tru:101064693|collagen, type VI, alpha!K03909|3|1.05e-18|91.3|mze:101473619|tissue factor pathway inhibitor	gi|392920025|ref|NP_001256133.1|	0	Uncharacterized protein CELE_ZK287.4 [Caenorhabditis elegans]
novel_mir2	NM_001268875.1	-34.1	0.056686	-29.58	170	ssu-2	-	-	gi|392901794|ref|NP_001255804.1|	0	Suppressor of Stomatin mutant Uncoordination [Caenorhabditis elegans]
novel_mir2	NM_067005.2	-31.5	0.468298	-52.04	323	W05B2.2	GO:0004867,GO:0010951,	K03909|1|6.98e-14|80.1|pbi:103065787|tissue factor pathway inhibitor	gi|71992017|ref|NP_499406.2|	0	Uncharacterized protein CELE_W05B2.2 [Caenorhabditis elegans]
novel_mir2	NM_058894.3	-27.4	0.776031	-25.92	155	acd-1	GO:0016021,GO:0005272,GO:0010447,GO:0035725,GO:0007413,	K03440|1|0.0|1332|cel:CELE_C24G7.2|acid-sensing ion channel, other	gi|71980907|ref|NP_491295.2|	0	Uncharacterized protein CELE_C24G7.2 [Caenorhabditis elegans]
novel_mir2	NM_001313073.1	-34.7	0.030043	-33.32	160	Y50D4B.1	-	K14381|1|4.52e-06|53.1|loa:LOAG_01401|sequestosome 1	gi|922580864|ref|NP_001300002.1|	0	Uncharacterized protein CELE_Y50D4B.1 [Caenorhabditis elegans]
novel_mir2	NM_001313463.1	-26.1	0.735774	-26.74	142	Y52B11A.11	GO:0016021,GO:0005913,GO:0016342,GO:0008013,GO:0005509,GO:0070097,GO:0003384,GO:0007016,GO:0007156,GO:0000003,GO:0043053,GO:0010171,GO:0007413,GO:0006898,GO:0042074,GO:0009792,GO:0000132,	-	gi|922581829|ref|NP_001300392.1|	0	Uncharacterized protein CELE_Y52B11A.11 [Caenorhabditis elegans]
novel_mir2	NM_063576.4	-28.5	0.766808	-25.58	149	C01G6.5	GO:0019915,GO:0009792,	-	gi|17531439|ref|NP_495977.1|	0	Uncharacterized protein CELE_C01G6.5 [Caenorhabditis elegans]
novel_mir2	NM_067701.6	-32.4	0.34509	-57.22	330	npp-8	GO:0005643,GO:0017056,GO:0006913,	K14312|1|0.0|2506|cel:CELE_Y41D4B.19|nuclear pore complex protein Nup155	gi|808355884|ref|NP_500102.4|	0	Nuclear Pore complex Protein [Caenorhabditis elegans]
novel_mir2	NM_071049.3	-26.8	0.133723	-27.05	157	F16B4.5	GO:0009792,GO:0000003,GO:0006898,GO:0002119,	-	gi|17559762|ref|NP_503450.1|	2.56328e-43	Uncharacterized protein CELE_F16B4.5 [Caenorhabditis elegans]
novel_mir2	NM_001306315.1	-31.9	0.649556	-28.02	165	dys-1	GO:0016014,GO:0005856,GO:0055120,GO:0042383,GO:0005277,GO:0008270,GO:0003779,GO:0045214,GO:0015870,GO:0046716,GO:0043056,GO:0040013,GO:0006836,GO:0007626,GO:0072488,GO:0040017,GO:0032224,	K10366|1|1.87e-174|577|gfr:102033021|dystrophin	gi|808354689|ref|NP_001293243.1|	0	DYStrophin related [Caenorhabditis elegans]
novel_mir2	NM_078263.3	-35.1	0.210299	-32.97	154	let-2	GO:0005587,GO:0030020,GO:0009792,GO:0002119,GO:0040018,GO:0000003,GO:0035188,GO:0016043,GO:0040039,	K06237|1|0.0|3105|cel:CELE_F01G12.5|collagen, type IV, alpha	gi|17568911|ref|NP_510664.1|	0	Collagen alpha-2(IV) chain [Caenorhabditis elegans]
novel_mir2	NM_001313078.1	-32.8	0.254709	-31.22	174	arid-1	GO:0017053,GO:0005634,GO:0044212,GO:0006357,	K07874|1|6.56e-06|55.8|dpl:KGM_17418|Ras-related protein Rab-1A	gi|922580870|ref|NP_001300005.1|	0	ARID (AT-rich Interactive Domain-containing protein) homolog [Caenorhabditis elegans]
novel_mir2	NM_001047777.1	-31.7	0.288367	-29.45	157	F11D5.1	-	-	gi|115533438|ref|NP_001041242.1|	0	Uncharacterized protein CELE_F11D5.1 [Caenorhabditis elegans]
novel_mir2	NM_060974.4	-36.5	0.025496	-40	165	atg-4.1	GO:0005829,GO:0004197,GO:0005515,GO:0051697,GO:0000045,GO:0006501,GO:0040007,GO:0044804,GO:0006612,GO:0016485,GO:0000422,	K08342|1|0.0|949|cel:CELE_Y87G2A.3|cysteine protease ATG4 [EC:3.4.22.-]	gi|453230621|ref|NP_001263575.1|	0	AuTophaGy (yeast Atg homolog) [Caenorhabditis elegans]
novel_mir2	NM_001028242.3	-32.7	0.110015	-29.61	150	hlh-30	GO:0005737,GO:0005634,GO:0000981,GO:0046983,GO:0010506,GO:0050829,GO:0008340,GO:0045944,GO:0000003,GO:0019915,GO:0050830,	K09455|1|2.05e-29|123|dre:30080|microphthalmia-associated transcription factor!K09105|2|3.66e-29|123|ola:101166296|transcription factor E3	gi|17542748|ref|NP_500461.1|	0	Helix Loop Helix [Caenorhabditis elegans]
novel_mir2	NM_001268445.1	-31.2	0.625498	-26.19	164	wnk-1	GO:0005829,GO:0005515,GO:0004674,GO:0005524,GO:0000122,GO:0007275,GO:0018991,GO:0032414,GO:2000021,GO:0006468,GO:0061404,GO:0050891,GO:0035556,	K08867|1|0.0|3424|cel:CELE_C46C2.1|WNK lysine deficient protein kinase [EC:2.7.11.1]	gi|392899979|ref|NP_001255374.1|	0	Serine/threonine-protein kinase WNK [Caenorhabditis elegans]
novel_mir2	NM_078156.5	-27.4	0.795987	-26.63	152	gcy-36	GO:0008074,GO:0030425,GO:0043025,GO:0005886,GO:0004383,GO:0019826,GO:0004016,GO:0046872,GO:0020037,GO:0005525,GO:0035556,GO:0070482,GO:0007631,GO:0006182,	K12319|1|0.0|1415|cel:CELE_C46E1.2|guanylate cyclase soluble subunit beta [EC:4.6.1.2]!K01769|3|0.0|881|cel:CELE_M04G12.3|guanylate cyclase, other [EC:4.6.1.2]	gi|86564713|ref|NP_510557.3|	0	Soluble guanylate cyclase gcy-36 [Caenorhabditis elegans]
novel_mir2	NM_001268519.1	-30.6	0.765971	-28.2	148	gon-1	GO:0005604,GO:0005794,GO:0005783,GO:0008270,GO:0004222,GO:0040035,GO:0006508,GO:0006888,GO:0040039,GO:0009792,GO:0015031,	K08624|1|0.0|4460|cel:CELE_F25H8.3|a disintegrin and metalloproteinase with thrombospondin motifs 9 [EC:3.4.24.-]	gi|392900278|ref|NP_001255448.1|	0	Uncharacterized protein CELE_F25H8.3 [Caenorhabditis elegans]
novel_mir2	NM_060975.3	-32.1	0.05528	-32.92	155	aex-6	GO:0030141,GO:0042470,GO:0008021,GO:0005525,GO:0003924,GO:0032402,GO:0040011,GO:1990504,GO:0045921,GO:0007264,GO:0002119,GO:1903364,GO:0090522,GO:0040035,	K07885|1|4.06e-160|445|cel:CELE_Y87G2A.4|Ras-related protein Rab-27A	gi|17510659|ref|NP_493376.1|	3.37808e-159	Uncharacterized protein CELE_Y87G2A.4 [Caenorhabditis elegans]
novel_mir2	NM_066759.3	-34.7	0.270302	-33.45	160	cbp-1	GO:0005634,GO:0003712,GO:0008270,GO:0004402,GO:0006355,GO:0016573,	K04498|1|0.0|4189|cel:CELE_R10E11.1|E1A/CREB-binding protein [EC:2.3.1.48]	gi|392896223|ref|NP_499160.2|	0	Protein cbp-1 [Caenorhabditis elegans]
novel_mir2	NM_060304.4	-26.5	0.64389	-26.34	154	Y106G6G.4	GO:0016021,	-	gi|17510871|ref|NP_492705.1|	0	Uncharacterized protein CELE_Y106G6G.4 [Caenorhabditis elegans]
novel_mir2	NM_001269203.1	-35	0.133063	-33.68	168	ZK287.4	GO:0004867,GO:0010951,	K03909|1|1.47e-18|90.5|mze:101473619|tissue factor pathway inhibitor!K06238|3|2.03e-18|97.4|tru:101064693|collagen, type VI, alpha	gi|392920023|ref|NP_001256132.1|	0	Uncharacterized protein CELE_ZK287.4 [Caenorhabditis elegans]
novel_mir2	NM_001029270.4	-26.1	0.547523	-25.89	156	C34F6.11	GO:0016021,GO:0006952,GO:0019915,	-	gi|71984701|ref|NP_001024441.1|	2.35614e-158	Uncharacterized protein CELE_C34F6.11 [Caenorhabditis elegans]
novel_mir2	NM_001307124.1	-26.3	0.64548	-51.02	305	grsp-2	-	-	gi|808357050|ref|NP_001294053.1|	2.19167e-149	Glycine Rich Secreted Protein [Caenorhabditis elegans]
cel-miR-235-5p	NM_058561.5	-29.3	0.268595	-25.61	167	mcm-4	GO:0042555,GO:0005634,GO:0003678,GO:0003677,GO:0005524,GO:0043652,GO:0032508,GO:0007399,GO:0002119,GO:0006270,GO:0040011,GO:0006997,GO:0009792,GO:0008406,	K02212|1|0.0|1716|cel:CELE_Y39G10AR.14|DNA replication licensing factor MCM4 [EC:3.6.4.12]	gi|17508417|ref|NP_490962.1|	0	yeast MCM (licensing factor) related [Caenorhabditis elegans]
cel-miR-235-5p	NM_001306244.1	-33	0.021296	-25.9	171	pif-1	GO:0005634,GO:0005739,GO:0005657,GO:0010521,GO:0043141,GO:0003677,GO:0005524,GO:0000002,GO:0032508,GO:0051974,GO:0006310,GO:0032211,GO:0044806,GO:0006260,GO:0006281,	K15255|1|0.0|825|cel:CELE_Y18H1A.6|ATP-dependent DNA helicase PIF1 [EC:3.6.4.12]	gi|25143421|ref|NP_490774.2|	0	ATP-dependent DNA helicase PIF1 [Caenorhabditis elegans]
cel-miR-235-5p	NM_001027697.3	-33.4	0.024028	-27.18	172	mvk-1	GO:0005829,GO:0004496,GO:0005524,GO:0009792,GO:0002119,GO:0016310,GO:0008299,GO:0008340,GO:0040011,	K00869|1|0.0|997|cel:CELE_Y42G9A.4|mevalonate kinase [EC:2.7.1.36]	gi|71993795|ref|NP_001022867.1|	0	MeValonate Kinase [Caenorhabditis elegans]
cel-miR-235-5p	NR_136364.1	-31.5	0.071795	-25.99	162	spas-1	-	-	-	-	-
cel-miR-235-5p	NM_001269186.1	-31.5	0.061404	-25.99	162	spas-1	GO:0005874,GO:0048471,GO:0005634,GO:0008017,GO:0005524,GO:0008568,GO:0051013,GO:0031117,GO:0001578,GO:0034214,GO:0051260,GO:0031122,GO:0040025,GO:0008152,GO:0051647,GO:0048477,	K13254|1|0.0|1053|cel:CELE_C24B5.2|spastin [EC:3.6.4.3]	gi|392919885|ref|NP_001256115.1|	0	SPAStin (human neurodegeneration-associated AAA ATPase) related [Caenorhabditis elegans]
cel-miR-235-5p	NM_058952.3	-34.8	0.337746	-143.58	1008	anc-1	GO:0016021,GO:0005640,GO:0005856,GO:0048471,GO:0051087,GO:0003779,GO:0007010,GO:0035046,GO:0018996,GO:0002119,GO:0006997,GO:0009792,	K19326|1|4.07e-50|206|oaa:100073483|nesprin-1	gi|71997792|ref|NP_491353.2|	0	Nuclear anchorage protein 1 [Caenorhabditis elegans]
cel-miR-235-5p	NM_001330974.1	-32.5	0.032226	-25.92	180	Y75B8A.6	GO:0005488,	-	gi|17556490|ref|NP_499579.1|	0	Uncharacterized protein CELE_Y75B8A.6 [Caenorhabditis elegans]
cel-miR-235-5p	NM_001027695.3	-33.4	0.033216	-27.18	172	mvk-1	GO:0005829,GO:0004496,GO:0005524,GO:0009792,GO:0002119,GO:0016310,GO:0008299,GO:0008340,GO:0040011,	K00869|1|0.0|1054|cbr:CBG21109|mevalonate kinase [EC:2.7.1.36]	gi|71993790|ref|NP_001022866.1|	0	MeValonate Kinase [Caenorhabditis elegans]
cel-miR-235-5p	NM_072209.3	-28.8	0.344028	-25.49	175	sago-1	GO:0003676,GO:0009792,GO:0016246,	K11593|1|9.67e-33|132|loa:LOAG_14207|eukaryotic translation initiation factor 2C	gi|17562538|ref|NP_504610.1|	0	Piwi-like protein [Caenorhabditis elegans]
cel-miR-235-5p	NM_066863.6	-31.1	0.065101	-27.81	164	cts-1	GO:0005759,GO:0004108,GO:0009792,GO:0002119,GO:0005975,GO:0006101,GO:0000003,GO:0006099,	K01647|1|0.0|970|cel:CELE_T20G5.2|citrate synthase [EC:2.3.3.1]	gi|17555174|ref|NP_499264.1|	0	Probable citrate synthase, mitochondrial [Caenorhabditis elegans]
cel-miR-235-5p	NM_001264443.1	-30.2	0.2025	-46.4	314	maph-1.2	GO:0009792,GO:0030163,GO:0019915,GO:0008406,	K10429|1|1.66e-11|74.3|cmy:102942003|microtubule-associated protein 1	gi|392886985|ref|NP_001251372.1|	0	Microtubule-Associated Protein Homolog [Caenorhabditis elegans]
cel-miR-235-5p	NM_001267466.1	-28.7	0.565527	-25.66	166	nep-17	GO:0016021,GO:0045121,GO:0004222,GO:0006508,	K08635|1|1.41e-118|408|sko:102800538|membrane metallo-endopeptidase-like 1!K01415|5|1.04e-82|296|cbr:CBG17774|endothelin-converting enzyme [EC:3.4.24.71]	gi|392892296|ref|NP_001254395.1|	0	NEPrilysin metallopeptidase family [Caenorhabditis elegans]
cel-miR-235-5p	NM_001047259.2	-27.6	0.669791	-25.34	166	lat-2	GO:0005886,GO:0016021,GO:0004930,GO:0004175,GO:0030246,GO:0007166,GO:0097264,GO:0007186,	K04593|1|0.0|2773|cel:CELE_B0286.2|latrophilin 2	gi|115532418|ref|NP_001040724.1|	0	Latrophilin-like protein LAT-2 [Caenorhabditis elegans]
cel-miR-235-5p	NM_001026265.2	-30.2	0.203492	-50.35	318	maph-1.1	GO:0009792,GO:0030163,GO:0019915,GO:0008406,	K10429|1|2.74e-12|76.6|chx:102176074|microtubule-associated protein 1	gi|71985143|ref|NP_001021436.1|	0	Microtubule-Associated Protein Homolog [Caenorhabditis elegans]
cel-miR-235-5p	NM_068274.2	-35.3	0.005623	-29.9	183	str-158	GO:0005887,GO:0038022,GO:0050911,GO:0007186,GO:0019915,GO:0042048,	K08473|1|0.0|676|cel:CELE_Y9C9A.9|nematode chemoreceptor	gi|71999673|ref|NP_500675.2|	0	Seven TM Receptor [Caenorhabditis elegans]
cel-miR-235-5p	NM_059542.2	-29.6	0.052628	-26.64	160	C37A2.6	GO:0008168,GO:0032259,	-	gi|115533699|ref|NP_491943.2|	0	Methyltransferase-like protein 20 homolog [Caenorhabditis elegans]
cel-miR-235-5p	NM_001330975.1	-32.5	0.03233	-25.92	180	Y75B8A.6	GO:0005488,	-	gi|17556490|ref|NP_499579.1|	0	Uncharacterized protein CELE_Y75B8A.6 [Caenorhabditis elegans]
cel-miR-235-5p	NM_001265527.1	-30.2	0.188752	-50.35	318	maph-1.1	GO:0009792,GO:0030163,GO:0019915,GO:0008406,	K10429|1|2.17e-12|77.0|chx:102176074|microtubule-associated protein 1	gi|392887888|ref|NP_001252456.1|	0	Microtubule-Associated Protein Homolog [Caenorhabditis elegans]
cel-miR-235-5p	NM_072199.5	-30.5	0.06303	-25.23	160	K08B12.1	GO:0016787,GO:0006629,	-	gi|193208333|ref|NP_504600.3|	0	Uncharacterized protein CELE_K08B12.1 [Caenorhabditis elegans]
cel-miR-235-5p	NM_171501.4	-31.5	0.051678	-25.99	162	spas-1	GO:0005874,GO:0048471,GO:0005634,GO:0008017,GO:0005524,GO:0008568,GO:0051013,GO:0031117,GO:0001578,GO:0034214,GO:0051260,GO:0031122,GO:0040025,GO:0008152,GO:0051647,GO:0048477,	K13254|1|0.0|867|cel:CELE_C24B5.2|spastin [EC:3.6.4.3]	gi|25146157|ref|NP_741586.1|	0	Probable spastin homolog spas-1 [Caenorhabditis elegans]
cel-miR-235-5p	NM_001026196.4	-25.8	0.784497	-43.01	327	icl-1	GO:0005739,GO:0004474,GO:0004451,GO:0008340,GO:0006099,GO:0006097,	K01638|1|6.43e-126|394|nve:NEMVE_v1g160432|malate synthase [EC:2.3.3.9]!K01637|3|3.12e-38|155|xtr:100216301|isocitrate lyase [EC:4.1.3.1]	gi|71982926|ref|NP_001021367.1|	0	Malate synthase [Caenorhabditis elegans]
cel-miR-235-5p	NM_001306245.1	-33	0.036463	-25.9	171	pif-1	GO:0005634,GO:0005739,GO:0005657,GO:0010521,GO:0043141,GO:0003677,GO:0005524,GO:0000002,GO:0032508,GO:0051974,GO:0006310,GO:0032211,GO:0044806,GO:0006260,GO:0006281,	K15255|1|0.0|1180|cel:CELE_Y18H1A.6|ATP-dependent DNA helicase PIF1 [EC:3.6.4.12]	gi|25143421|ref|NP_490774.2|	0	ATP-dependent DNA helicase PIF1 [Caenorhabditis elegans]
cel-miR-235-5p	NM_075217.1	-33.6	0.012145	-27.13	174	srh-179	GO:0016021,GO:0050907,	K08473|1|1.09e-152|436|cel:CELE_ZK228.8|nematode chemoreceptor	gi|17566818|ref|NP_507618.1|	0	Serpentine Receptor, class H [Caenorhabditis elegans]
cel-miR-235-5p	NM_065377.2	-26.6	0.665537	-50.91	314	maph-1.3	GO:0009792,GO:0030163,GO:0019915,GO:0008406,	K10429|1|5.70e-11|72.4|gja:107109715|microtubule-associated protein 1	gi|392894540|ref|NP_497778.2|	0	Microtubule-Associated Protein Homolog [Caenorhabditis elegans]
cel-miR-235-5p	NM_058373.5	-33	0.045995	-25.9	171	pif-1	GO:0005634,GO:0005739,GO:0005657,GO:0010521,GO:0043141,GO:0003677,GO:0005524,GO:0000002,GO:0032508,GO:0051974,GO:0006310,GO:0032211,GO:0044806,GO:0006260,GO:0006281,	K15255|1|0.0|1399|cel:CELE_Y18H1A.6|ATP-dependent DNA helicase PIF1 [EC:3.6.4.12]	gi|25143421|ref|NP_490774.2|	0	ATP-dependent DNA helicase PIF1 [Caenorhabditis elegans]
cel-miR-235-5p	NM_058455.3	-31.9	0.149418	-29.01	176	spe-15	GO:0016459,GO:0005524,GO:0003774,GO:0003779,GO:0051640,GO:0007286,GO:0008152,GO:0009792,	K10358|1|0.0|2544|cel:CELE_F47G6.4|myosin VI	gi|17508741|ref|NP_490856.1|	0	Uncharacterized protein CELE_F47G6.4 [Caenorhabditis elegans]
cel-miR-235-5p	NM_001026267.2	-30.2	0.203244	-50.35	318	maph-1.1	GO:0009792,GO:0030163,GO:0019915,GO:0008406,	K10429|1|2.98e-12|76.6|chx:102176074|microtubule-associated protein 1	gi|71985154|ref|NP_001021438.1|	0	Microtubule-Associated Protein Homolog [Caenorhabditis elegans]
cel-miR-235-5p	NM_001026266.2	-30.2	0.174798	-50.35	318	maph-1.1	GO:0009792,GO:0030163,GO:0019915,GO:0008406,	K10429|1|3.24e-12|76.3|pss:102444752|microtubule-associated protein 1	gi|71985152|ref|NP_001021437.1|	0	Microtubule-Associated Protein Homolog [Caenorhabditis elegans]
cel-miR-235-5p	NM_073868.3	-28.5	0.423976	-47.54	322	eat-6	GO:0005887,GO:0043231,GO:0046872,GO:0005391,GO:0005524,GO:0000003,GO:0030007,GO:0006937,GO:0036376,GO:0040007,GO:0001508,GO:0010248,GO:0015991,GO:0006883,GO:0009792,GO:0002119,GO:0030163,GO:0010107,GO:0010171,GO:0007271,	K01539|1|0.0|2066|cel:CELE_B0365.3|sodium/potassium-transporting ATPase subunit alpha [EC:3.6.3.9]	gi|17559224|ref|NP_506269.1|	0	Sodium/potassium-transporting ATPase subunit alpha [Caenorhabditis elegans]
cel-miR-235-5p	NM_001027696.5	-33.4	0.033751	-27.18	172	mvk-1	GO:0005829,GO:0004496,GO:0005524,GO:0009792,GO:0002119,GO:0016310,GO:0008299,GO:0008340,GO:0040011,	K00869|1|0.0|1042|cel:CELE_Y42G9A.4|mevalonate kinase [EC:2.7.1.36]	gi|71993795|ref|NP_001022867.1|	0	MeValonate Kinase [Caenorhabditis elegans]
cel-miR-235-5p	NM_061967.2	-31.4	0.097237	-25.87	169	nhr-119	GO:0090575,GO:0008270,GO:0003707,GO:0004879,GO:0003682,GO:0000976,GO:0009888,GO:0043401,GO:0045944,GO:0030522,	K08704|1|1.09e-42|166|cbr:CBG03844|hepatocyte nuclear factor 4!K08525|2|7.78e-37|148|pbi:103055088|retinoid X receptor beta!K07292|3|2.68e-31|132|fab:101818481|hepatocyte nuclear factor 4-alpha!K08553|5|8.05e-30|127|ola:100302426|estrogen-related receptor beta	gi|392889409|ref|NP_494368.2|	0	Nuclear Hormone Receptor family [Caenorhabditis elegans]
cel-miR-235-5p	NM_070487.3	-34.3	0.01561	-28.92	169	Y105C5A.24	GO:0055120,GO:0005515,GO:0004709,GO:0018107,GO:0000186,GO:0044333,GO:0042694,GO:0008356,GO:0046777,GO:0001714,GO:0048557,GO:0045167,	K04427|1|0.0|1004|cel:CELE_Y105C5A.24|mitogen-activated protein kinase kinase kinase 7 [EC:2.7.11.25]	gi|71995426|ref|NP_502888.2|	0	Uncharacterized protein CELE_Y105C5A.24 [Caenorhabditis elegans]
cel-miR-235-5p	NR_050261.1	-25.2	0.088961	-41.34	311	T28F4.7	-	-	-	-	-
cel-miR-235-5p	NM_064846.3	-31.6	0.139404	-27.28	167	pat-12	GO:0030056,GO:0005515,GO:0009792,GO:0002119,GO:0031581,GO:0018996,GO:0061199,	-	gi|71991085|ref|NP_497247.2|	0	Paralysed Arrest at Two-fold [Caenorhabditis elegans]
cel-miR-235-5p	NM_066070.3	-34.2	0.055675	-27.45	182	F37A4.4	-	K10683|1|1.76e-13|80.5|cel:CELE_K04C2.4|BRCA1-associated RING domain protein 1	gi|17553288|ref|NP_498471.1|	0	Ankyrin repeat-containing protein F37A4.4 [Caenorhabditis elegans]
cel-miR-235-5p	NM_075881.5	-27	0.181567	-43.11	312	dhs-25	GO:0016491,GO:0055114,	K13370|1|0.0|502|cel:CELE_F09E10.3|17beta-estradiol 17-dehydrogenase / 3alpha(17beta)-hydroxysteroid dehydrogenase (NAD+) [EC:1.1.1.62 1.1.1.239]	gi|25147288|ref|NP_508282.2|	1.08221e-180	DeHydrogenases, Short chain [Caenorhabditis elegans]
cel-miR-235-5p	NM_001330973.1	-32.5	0.030155	-25.92	180	Y75B8A.6	GO:0005488,	-	gi|17556490|ref|NP_499579.1|	0	Uncharacterized protein CELE_Y75B8A.6 [Caenorhabditis elegans]
cel-miR-235-5p	NM_001027698.3	-33.4	0.026225	-27.18	172	mvk-1	GO:0005829,GO:0004496,GO:0005524,GO:0009792,GO:0002119,GO:0016310,GO:0008299,GO:0008340,GO:0040011,	K00869|1|0.0|1053|cel:CELE_Y42G9A.4|mevalonate kinase [EC:2.7.1.36]	gi|71993806|ref|NP_001022869.1|	0	MeValonate Kinase [Caenorhabditis elegans]
cel-miR-235-5p	NM_074225.3	-25.8	0.709474	-43.69	310	daf-21	GO:0045121,GO:0048471,GO:0042802,GO:0051082,GO:0016887,GO:0005524,GO:0061077,GO:0070781,GO:0008340,GO:0043327,GO:0050920,GO:0006611,GO:0006915,GO:0009792,GO:0006468,GO:0010035,GO:0040024,GO:0006952,GO:0009593,GO:0040035,GO:0007049,	K04079|1|0.0|1432|cel:CELE_C47E8.5|molecular chaperone HtpG	gi|17559162|ref|NP_506626.1|	0	Heat shock protein 90 [Caenorhabditis elegans]
cel-miR-799	NM_001269456.1	-28.4	0.038441	-26.99	160	mif-2	GO:0009792,	K07253|1|1.07e-23|93.2|obi:106879456|phenylpyruvate tautomerase [EC:5.3.2.1]!K10028|2|5.81e-23|91.3|hgl:101717732|D-dopachrome decarboxylase [EC:4.1.1.84]	gi|392920966|ref|NP_001256385.1|	4.84896e-98	MIF (Macrophage migration Inhibitory Factor) related [Caenorhabditis elegans]
cel-miR-799	NM_001313058.1	-34.9	0.015326	-32.04	176	mgl-3	GO:0005887,GO:0042734,GO:0008066,GO:0004930,GO:0006629,GO:0007196,GO:0051966,GO:0010884,	K04608|1|0.0|1247|cel:CELE_Y4C6A.2|metabotropic glutamate receptor 6/7/8	gi|808356002|ref|NP_741400.2|	0	Metabotropic GLutamate receptor family [Caenorhabditis elegans]
cel-miR-799	NM_001313057.1	-34.9	0.015403	-32.04	176	mgl-3	GO:0005887,GO:0042734,GO:0008066,GO:0004930,GO:0006629,GO:0007196,GO:0051966,GO:0010884,	K04608|1|0.0|1256|cel:CELE_Y4C6A.2|metabotropic glutamate receptor 6/7/8	gi|808356008|ref|NP_001076735.3|	0	Metabotropic GLutamate receptor family [Caenorhabditis elegans]
cel-miR-799	NM_001269457.1	-28.4	0.029571	-26.99	160	mif-2	GO:0009792,	K07253|1|6.33e-24|92.8|obi:106879456|phenylpyruvate tautomerase [EC:5.3.2.1]!K10028|2|3.01e-23|91.3|hgl:101717732|D-dopachrome decarboxylase [EC:4.1.1.84]	gi|392920966|ref|NP_001256385.1|	2.13462e-82	MIF (Macrophage migration Inhibitory Factor) related [Caenorhabditis elegans]
cel-miR-799	NR_132463.1	-34.9	0.030961	-32.04	176	mgl-3	-	-	-	-	-
cel-miR-799	NM_001083266.3	-34.9	0.032217	-32.04	176	mgl-3	GO:0016021,GO:0005886,GO:0004930,GO:0007186,	K04608|1|0.0|2106|cel:CELE_Y4C6A.2|metabotropic glutamate receptor 6/7/8!K04605|3|0.0|697|tsp:Tsp_07699|metabotropic glutamate receptor 2/3	gi|808356008|ref|NP_001076735.3|	0	Metabotropic GLutamate receptor family [Caenorhabditis elegans]
cel-miR-799	NM_171341.4	-34.9	0.032132	-32.04	176	mgl-3	GO:0016021,GO:0005886,GO:0004930,GO:0007186,	K04608|1|0.0|2096|cel:CELE_Y4C6A.2|metabotropic glutamate receptor 6/7/8!K04605|3|0.0|697|tsp:Tsp_07699|metabotropic glutamate receptor 2/3	gi|808356002|ref|NP_741400.2|	0	Metabotropic GLutamate receptor family [Caenorhabditis elegans]
cel-miR-799	NM_059680.4	-31.2	0.079064	-29.17	158	scav-6	GO:0016021,	K12384|1|6.21e-43|165|tsp:Tsp_06331|lysosome membrane protein 2	gi|17506523|ref|NP_492081.1|	0	SCAVenger receptor (CD36 family) related [Caenorhabditis elegans]
cel-miR-799	NR_132462.1	-34.9	0.031089	-32.04	176	mgl-3	-	-	-	-	-
cel-miR-799	NM_001269458.1	-28.4	0.01805	-26.99	160	mif-2	GO:0009792,	K07253|1|3.22e-16|72.0|xtr:100134996|phenylpyruvate tautomerase [EC:5.3.2.1]!K10028|3|8.27e-15|68.6|hgl:101717732|D-dopachrome decarboxylase [EC:4.1.1.84]	gi|392920966|ref|NP_001256385.1|	4.55915e-59	MIF (Macrophage migration Inhibitory Factor) related [Caenorhabditis elegans]
cel-miR-799	NR_132461.1	-34.9	0.034256	-32.04	176	mgl-3	-	-	-	-	-
cel-miR-799	NM_001136456.2	-30.9	0.125516	-26.02	162	chtl-1	GO:0016021,GO:0040035,GO:0040002,GO:0002119,	K15377|1|0.0|1415|cbr:CBG14673|solute carrier family 44 (choline transporter-like protein), member 2/4/5	gi|212646816|ref|NP_001129928.1|	0	Choline transporter-like protein 1 [Caenorhabditis elegans]
cel-miR-799	NM_059014.2	-26.7	0.108864	-25.07	172	lmd-2	-	-	gi|17505272|ref|NP_491415.1|	9.00663e-114	LysM Domain (peptidoglycan binding) protein [Caenorhabditis elegans]
cel-miR-799	NM_171685.5	-30.9	0.125131	-26.02	162	chtl-1	GO:0016021,GO:0040035,GO:0040002,GO:0002119,	K15377|1|0.0|1420|cbr:CBG14673|solute carrier family 44 (choline transporter-like protein), member 2/4/5	gi|32566439|ref|NP_741789.2|	0	Choline transporter-like protein 1 [Caenorhabditis elegans]
cel-miR-799	NM_171686.5	-30.9	0.117222	-26.02	162	chtl-1	GO:0016021,GO:0040035,GO:0040002,GO:0002119,	K15377|1|0.0|1504|cel:CELE_F35C8.7|solute carrier family 44 (choline transporter-like protein), member 2/4/5	gi|32566441|ref|NP_741790.2|	0	Choline transporter-like protein 1 [Caenorhabditis elegans]
cel-miR-799	NM_064780.4	-27.7	0.274332	-25.07	163	Y50D7A.3	GO:0005964,GO:0005516,GO:0004689,GO:0005524,GO:0006468,GO:0040035,GO:0005978,	K00871|1|0.0|1009|cel:CELE_Y50D7A.3|phosphorylase kinase gamma subunit [EC:2.7.11.19]	gi|32564607|ref|NP_497181.2|	0	Uncharacterized protein CELE_Y50D7A.3 [Caenorhabditis elegans]
cel-miR-799	NM_065850.1	-32.7	0.018459	-26.57	160	ceh-10	GO:0005634,GO:0043565,GO:0003700,GO:0001764,GO:0018991,GO:0030334,GO:0048666,GO:1904081,	K09336|1|0.0|724|cel:CELE_W03A3.1|visual system homeobox protein 2	gi|17552732|ref|NP_498251.1|	0	Homeobox protein ceh-10 [Caenorhabditis elegans]
cel-miR-799	NM_001028762.1	-27.8	0.397779	-44.72	320	col-163	GO:0016021,GO:0005581,	K19721|1|3.20e-14|82.4|myd:102752771|collagen, type V/XI/XXIV/XXVII, alpha	gi|71994562|ref|NP_001023933.1|	0	COLlagen [Caenorhabditis elegans]
cel-miR-799	NM_062201.4	-28.5	0.159028	-25.48	157	M151.1	GO:0009792,	-	gi|71992798|ref|NP_494602.3|	0	Uncharacterized protein CELE_M151.1 [Caenorhabditis elegans]
cel-miR-41-3p	NM_171367.5	-30.1	0.19791	-26.05	152	lin-45	GO:0005622,GO:0004674,GO:0017016,GO:0046872,GO:0005524,GO:0005057,GO:0006952,GO:0007265,GO:0006468,GO:0030421,GO:0008340,GO:0051321,GO:0040025,GO:0042006,GO:0001708,GO:0048477,GO:0009792,	K04365|1|0.0|1612|cel:CELE_Y73B6A.5|B-Raf proto-oncogene serine/threonine-protein kinase [EC:2.7.11.1]	gi|808356628|ref|NP_001293842.1|	0	Uncharacterized protein CELE_Y73B6A.5 [Caenorhabditis elegans]
cel-miR-41-3p	NM_058544.4	-28.6	0.530891	-25.64	166	W03F11.4	-	K02374|1|4.58e-21|106|mze:101487159|tyrosine-protein phosphatase non-receptor type 13	gi|808354461|ref|NP_490945.2|	0	Protein-tyrosine-phosphatase [Caenorhabditis elegans]
cel-miR-41-3p	NM_060757.2	-30.3	0.057919	-27.12	160	C54C8.3	GO:0000139,GO:0016021,GO:0008378,GO:0006486,	K07819|1|3.36e-25|107|isc:IscW_ISCW003730|beta-1,3-galactosyltransferase 1 [EC:2.4.1.-]	gi|71982396|ref|NP_493158.2|	0	Uncharacterized protein CELE_C54C8.3 [Caenorhabditis elegans]
cel-miR-41-3p	NM_077704.1	-26.8	0.046518	-25.81	166	T24D5.4	GO:0005737,GO:0016324,GO:0001225,GO:0046872,GO:0004674,GO:0005524,GO:0008340,GO:0045176,GO:0061067,GO:0040011,GO:0042308,GO:0018105,GO:0009792,GO:0043065,GO:0060465,GO:0048621,GO:0045793,GO:0000082,GO:0030421,GO:0046620,GO:0035329,	K08791|1|4.58e-47|164|cel:CELE_T20F10.1|serine/threonine-protein kinase LATS1/2 [EC:2.7.11.1]	gi|17570029|ref|NP_510105.1|	2.33607e-62	Uncharacterized protein CELE_T24D5.4 [Caenorhabditis elegans]
cel-miR-41-3p	NR_072262.1	-25.3	0.153308	-27.25	154	E01G6.8	-	-	-	-	-
cel-miR-41-3p	NM_001306915.1	-30.1	0.186221	-26.05	152	lin-45	GO:0005622,GO:0004674,GO:0017016,GO:0046872,GO:0005524,GO:0005057,GO:0006952,GO:0007265,GO:0006468,GO:0030421,GO:0008340,GO:0051321,GO:0040025,GO:0042006,GO:0001708,GO:0048477,GO:0009792,	K04365|1|0.0|1602|cel:CELE_Y73B6A.5|B-Raf proto-oncogene serine/threonine-protein kinase [EC:2.7.11.1]	gi|808356628|ref|NP_001293842.1|	0	Uncharacterized protein CELE_Y73B6A.5 [Caenorhabditis elegans]
cel-miR-41-3p	NM_001267299.1	-25.9	0.497032	-25.18	166	ZK1321.4	-	K19867|1|4.01e-07|58.2|cel:CELE_T11B7.4|LIM domain-binding protein 3	gi|392891312|ref|NP_001254228.1|	0	Uncharacterized protein CELE_ZK1321.4 [Caenorhabditis elegans]
cel-miR-41-3p	NM_171368.2	-30.1	0.208929	-26.05	152	lin-45	GO:0005622,GO:0004674,GO:0017016,GO:0046872,GO:0005524,GO:0005057,GO:0006952,GO:0007265,GO:0006468,GO:0030421,GO:0008340,GO:0051321,GO:0040025,GO:0042006,GO:0001708,GO:0048477,GO:0009792,	K04365|1|0.0|1613|cel:CELE_Y73B6A.5|B-Raf proto-oncogene serine/threonine-protein kinase [EC:2.7.11.1]	gi|808356060|ref|NP_741431.2|	0	Raf homolog serine/threonine-protein kinase [Caenorhabditis elegans]
cel-miR-41-3p	NM_001322702.1	-28.6	0.260874	-26.84	152	F53A10.2	GO:0005096,GO:0005515,GO:0051056,GO:0043547,	K17700|1|0.0|1267|cel:CELE_F53A10.2|RAP1 GTPase activating protein 1	gi|71990097|ref|NP_001022190.1|	0	Uncharacterized protein CELE_F53A10.2 [Caenorhabditis elegans]
cel-miR-41-3p	NM_060752.1	-28.9	0.136146	-26.02	160	E03H4.11	GO:0000139,GO:0016021,GO:0008378,GO:0006486,	K07819|1|5.53e-24|105|isc:IscW_ISCW003730|beta-1,3-galactosyltransferase 1 [EC:2.4.1.-]	gi|17506485|ref|NP_493153.1|	0	Uncharacterized protein CELE_E03H4.11 [Caenorhabditis elegans]
cel-miR-41-3p	NM_068123.4	-35.6	0.004183	-34.6	176	col-33	GO:0016021,GO:0005581,GO:0042302,	K06237|1|1.78e-14|79.3|phu:Phum_PHUM136030|collagen, type IV, alpha	gi|71987869|ref|NP_500524.2|	0	COLlagen [Caenorhabditis elegans]
cel-miR-41-3p	NM_001029287.3	-28	0.195013	-26.28	174	abhd-3.2	GO:0016021,GO:0052689,GO:0008152,	K13696|1|0.0|782|cel:CELE_C44C1.5|abhydrolase domain-containing protein 1/3	gi|71985405|ref|NP_001024458.1|	0	Putative esterase C44C1.5 [Caenorhabditis elegans]
cel-miR-41-3p	NM_061527.6	-28.6	0.318335	-26.84	152	F53A10.2	GO:0005096,GO:0005515,GO:0051056,GO:0043547,	K17700|1|0.0|1560|cel:CELE_F53A10.2|RAP1 GTPase activating protein 1	gi|17534265|ref|NP_493928.1|	0	Uncharacterized protein CELE_F53A10.2 [Caenorhabditis elegans]
cel-miR-41-3p	NM_075474.4	-28.9	0.222566	-25.52	161	fre-1	GO:0005737,GO:0005634,GO:0050660,GO:0050661,GO:0003958,GO:0010181,GO:0016226,GO:0055114,	K15014|1|9.70e-125|390|ame:552491|solute carrier family 29 (equilibrative nucleoside transporter), member 1/2/3	gi|17566446|ref|NP_507875.1|	0	NADPH-dependent diflavin oxidoreductase 1 [Caenorhabditis elegans]
cel-miR-41-3p	NR_056652.1	-28.1	0.016173	-27.89	158	C10C6.11	-	-	-	-	-
cel-miR-41-3p	NM_001026553.1	-27.7	0.099433	-26.02	166	clec-105	GO:0030246,	-	gi|71993553|ref|NP_001021724.1|	1.43478e-146	C-type LECtin [Caenorhabditis elegans]
cel-miR-41-3p	NM_068189.3	-25.7	0.416868	-26.65	148	F28E10.4	GO:0006898,	-	gi|193206200|ref|NP_500590.2|	0	Uncharacterized protein CELE_F28E10.4 [Caenorhabditis elegans]
cel-miR-41-3p	NM_001136400.2	-31.4	0.129265	-28.95	163	T23B5.3	-	-	gi|212646167|ref|NP_001129872.1|	0	Uncharacterized protein CELE_T23B5.3 [Caenorhabditis elegans]
cel-miR-41-3p	NR_072157.1	-28.9	0.021131	-26.1	156	Y71H9A.6	-	-	-	-	-
cel-miR-41-3p	NM_001306914.1	-30.1	0.189423	-26.05	152	lin-45	GO:0005622,GO:0004674,GO:0017016,GO:0046872,GO:0005524,GO:0005057,GO:0006952,GO:0007265,GO:0006468,GO:0030421,GO:0008340,GO:0051321,GO:0040025,GO:0042006,GO:0001708,GO:0048477,GO:0009792,	K04365|1|0.0|1612|cel:CELE_Y73B6A.5|B-Raf proto-oncogene serine/threonine-protein kinase [EC:2.7.11.1]	gi|808356630|ref|NP_001293843.1|	0	Uncharacterized protein CELE_Y73B6A.5 [Caenorhabditis elegans]
cel-miR-41-3p	NM_001307796.1	-28.9	0.223808	-25.52	161	fre-1	GO:0005737,GO:0005634,GO:0050660,GO:0050661,GO:0003958,GO:0010181,GO:0016226,GO:0055114,	K15014|1|1.24e-123|387|ame:552491|solute carrier family 29 (equilibrative nucleoside transporter), member 1/2/3	gi|808358784|ref|NP_001294725.1|	0	NADPH-dependent diflavin oxidoreductase 1 [Caenorhabditis elegans]
cel-miR-41-3p	NM_001306912.1	-30.1	0.193941	-26.05	152	lin-45	GO:0005622,GO:0004674,GO:0017016,GO:0046872,GO:0005524,GO:0005057,GO:0006952,GO:0007265,GO:0006468,GO:0030421,GO:0008340,GO:0051321,GO:0040025,GO:0042006,GO:0001708,GO:0048477,GO:0009792,	K04365|1|0.0|1664|cel:CELE_Y73B6A.5|B-Raf proto-oncogene serine/threonine-protein kinase [EC:2.7.11.1]	gi|808356626|ref|NP_001293841.1|	0	Uncharacterized protein CELE_Y73B6A.5 [Caenorhabditis elegans]
cel-miR-41-3p	NM_001322701.1	-28.6	0.292679	-26.84	152	F53A10.2	GO:0005096,GO:0005515,GO:0051056,GO:0043547,	K17700|1|0.0|1422|cel:CELE_F53A10.2|RAP1 GTPase activating protein 1	gi|17534265|ref|NP_493928.1|	0	Uncharacterized protein CELE_F53A10.2 [Caenorhabditis elegans]
cel-miR-41-3p	NM_001322703.1	-28.6	0.250984	-26.84	152	F53A10.2	GO:0005096,GO:0005515,GO:0051056,GO:0043547,	K17700|1|0.0|1217|cel:CELE_F53A10.2|RAP1 GTPase activating protein 1	gi|71990097|ref|NP_001022190.1|	0	Uncharacterized protein CELE_F53A10.2 [Caenorhabditis elegans]
cel-miR-41-3p	NM_001306913.1	-30.1	0.204486	-26.05	152	lin-45	GO:0005622,GO:0004674,GO:0017016,GO:0046872,GO:0005524,GO:0005057,GO:0006952,GO:0007265,GO:0006468,GO:0030421,GO:0008340,GO:0051321,GO:0040025,GO:0042006,GO:0001708,GO:0048477,GO:0009792,	K04365|1|0.0|1615|cel:CELE_Y73B6A.5|B-Raf proto-oncogene serine/threonine-protein kinase [EC:2.7.11.1]	gi|808356628|ref|NP_001293842.1|	0	Uncharacterized protein CELE_Y73B6A.5 [Caenorhabditis elegans]
cel-miR-41-3p	NM_067615.1	-26.1	0.606315	-25.3	158	F58H7.1	-	-	gi|17540858|ref|NP_500016.1|	0	Uncharacterized protein CELE_F58H7.1 [Caenorhabditis elegans]
cel-miR-41-3p	NM_001027019.1	-28.6	0.346205	-26.84	152	F53A10.2	GO:0005096,GO:0005515,GO:0051056,GO:0043547,	K17700|1|0.0|1333|cel:CELE_F53A10.2|RAP1 GTPase activating protein 1	gi|71990097|ref|NP_001022190.1|	0	Uncharacterized protein CELE_F53A10.2 [Caenorhabditis elegans]
cel-miR-4812-5p	NM_071830.5	-31.3	0.034488	-26.87	172	T08H10.1	GO:0016491,GO:0055114,	K00011|1|3.11e-88|279|crg:105340071|aldehyde reductase [EC:1.1.1.21]	gi|17564128|ref|NP_504231.1|	0	Uncharacterized protein CELE_T08H10.1 [Caenorhabditis elegans]
cel-miR-4812-5p	NM_072055.5	-34	0.019393	-28.39	175	hpo-15	GO:0016491,GO:0008340,GO:0055114,	K12259|1|5.45e-55|196|crg:105319590|spermine oxidase [EC:1.5.3.16 1.5.3.-]!K00308|3|6.72e-48|179|spu:579633|N1-acetylpolyamine oxidase [EC:1.5.3.13]	gi|17558184|ref|NP_504456.1|	0	Uncharacterized protein CELE_C24G6.6 [Caenorhabditis elegans]
cel-miR-4812-5p	NM_001268702.1	-29.4	0.184656	-26.04	158	hpo-12	GO:0016021,GO:0022857,GO:0009792,GO:0006820,GO:0040018,GO:0055085,	K15108|1|0.0|1055|cbr:CBG06270|solute carrier family 25 (mitochondrial thiamine pyrophosphate transporter), member 19!K08171|2|9.81e-118|362|cel:CELE_F47B8.10|MFS transporter, OPA family, solute carrier family 37 (glycerol-6-phosphate transporter), member 4	gi|392901136|ref|NP_001255631.1|	0	Uncharacterized protein CELE_C42C1.10 [Caenorhabditis elegans]
cel-miR-4812-5p	NM_074526.6	-28.9	0.240453	-25.5	154	haf-3	GO:0016021,GO:0042626,GO:0005524,GO:0055085,	K02021|1|0.0|1363|cel:CELE_F57A10.3|putative ABC transport system ATP-binding protein!K19762|2|0.0|664|cel:CELE_C30H6.6|ATP-binding cassette, subfamily B, HAIF transporter!K05657|3|0.0|645|bmy:Bm1_50255|ATP-binding cassette, subfamily B (MDR/TAP), member 10	gi|193208177|ref|NP_506927.2|	0	HAlF transporter (PGP related) [Caenorhabditis elegans]
cel-miR-4812-5p	NM_001268703.1	-29.4	0.077299	-26.04	158	hpo-12	GO:0016021,GO:0022857,GO:0009792,GO:0006820,GO:0040018,GO:0055085,	K15108|1|0.0|587|cbr:CBG06270|solute carrier family 25 (mitochondrial thiamine pyrophosphate transporter), member 19	gi|392901138|ref|NP_001255632.1|	0	Uncharacterized protein CELE_C42C1.10 [Caenorhabditis elegans]
cel-miR-4812-5p	NM_001025985.1	-31.8	0.022758	-27.16	166	C07A9.13	-	K01090|1|5.10e-06|52.8|cel:CELE_C23G10.1|protein phosphatase [EC:3.1.3.16]	gi|71981345|ref|NP_001021156.1|	0	Uncharacterized protein CELE_C07A9.13 [Caenorhabditis elegans]
cel-miR-4812-5p	NM_075403.3	-30.4	0.099504	-25.3	163	dyf-19	-	K16471|1|1.96e-12|75.5|bta:513998|Fas-binding factor 1	gi|72001165|ref|NP_507804.2|	0	Uncharacterized protein CELE_Y43F8C.4 [Caenorhabditis elegans]
cel-miR-4812-5p	NM_065723.5	-27.1	0.473583	-25.17	165	ztf-8	GO:0005730,GO:0000793,GO:0003676,GO:0071688,GO:0006302,GO:0000003,GO:0040011,	-	gi|32565018|ref|NP_498124.2|	0	Zinc finger putative Transcription Factor family [Caenorhabditis elegans]
cel-miR-4812-5p	NM_077781.3	-31.8	0.103449	-27.28	167	F09A5.2	GO:0016021,GO:0004714,GO:0005524,GO:0018108,	K08252|1|0.0|1873|cel:CELE_F09A5.2|receptor protein-tyrosine kinase [EC:2.7.10.1]!K12378|3|1.10e-55|211|bmor:100322874|tyrosine-protein kinase receptor torso [EC:2.7.10.1]	gi|17551512|ref|NP_510182.1|	0	Putative tyrosine-protein kinase F09A5.2 [Caenorhabditis elegans]
cel-miR-4812-5p	NM_064544.4	-30.6	0.303006	-25.3	163	xrn-1	GO:0004527,GO:0003676,GO:0090304,	K12618|1|0.0|3327|cel:CELE_Y39G8C.1|5'-3' exoribonuclease 1 [EC:3.1.13.-]	gi|212645611|ref|NP_496945.3|	0	5'-3' exoribonuclease 1 [Caenorhabditis elegans]
cel-miR-243-5p	NM_076880.5	-27.1	0.157155	-25.22	161	sto-1	GO:0016021,	K17286|1|0.0|596|cel:CELE_F08C6.4|erythrocyte band 7 integral membrane protein	gi|17569493|ref|NP_509281.1|	0	Stomatin-1 [Caenorhabditis elegans]
cel-miR-243-5p	NM_078104.2	-29.8	0.186225	-27.23	161	H40L08.3	-	-	gi|71992736|ref|NP_510505.2|	0	Uncharacterized protein CELE_H40L08.3 [Caenorhabditis elegans]
cel-miR-243-5p	NM_067112.4	-28	0.069012	-25.95	159	Y41C4A.7	-	-	gi|71993759|ref|NP_499513.2|	0	Uncharacterized protein CELE_Y41C4A.7 [Caenorhabditis elegans]
cel-miR-243-5p	NM_001129652.3	-27.1	0.154141	-25.22	161	sto-1	GO:0016021,	K17286|1|0.0|671|cel:CELE_F08C6.4|erythrocyte band 7 integral membrane protein	gi|193209764|ref|NP_001123124.1|	0	STOmatin [Caenorhabditis elegans]
cel-miR-243-5p	NM_071959.5	-27.2	0.429805	-25.54	156	Y58A7A.3	-	-	gi|17566032|ref|NP_504360.1|	0	Uncharacterized protein CELE_Y58A7A.3 [Caenorhabditis elegans]
cel-miR-243-5p	NM_062385.4	-26.8	0.729614	-25.64	162	twk-2	GO:0005887,GO:0022841,GO:0015271,GO:0030322,GO:0006936,GO:0071805,GO:0040011,	K05323|1|0.0|3440|cel:CELE_T12C9.3|potassium channel subfamily K, invertebrate	gi|193204927|ref|NP_494786.4|	0	TWiK family of potassium channels [Caenorhabditis elegans]
cel-miR-243-5p	NM_059652.4	-30	0.326244	-27.77	163	myo-1	GO:0005863,GO:0008307,GO:0005524,GO:0003774,GO:0003779,GO:0043050,GO:0048017,GO:0002119,GO:0008152,GO:0009792,GO:0006936,	K10352|1|0.0|3972|cel:CELE_R06C7.10|myosin heavy chain	gi|17508449|ref|NP_492053.1|	0	Myosin-1 [Caenorhabditis elegans]
cel-miR-243-5p	NM_067092.4	-32.5	0.006934	-30.91	164	Y66D12A.9	GO:0008537,GO:0005737,GO:0061133,GO:0010950,GO:0061136,GO:2000045,	K06698|1|0.0|511|cel:CELE_Y66D12A.9|proteasome activator subunit 3 (PA28 gamma)	gi|17556346|ref|NP_499493.1|	0	Uncharacterized protein CELE_Y66D12A.9 [Caenorhabditis elegans]
cel-miR-243-5p	NM_058671.7	-27.3	0.440125	-25.65	159	parp-1	GO:0005737,GO:0005634,GO:0008270,GO:0003910,GO:0003677,GO:0003950,GO:0070212,GO:0008340,GO:0051103,GO:0006273,	K10798|1|0.0|1986|cel:CELE_Y71F9AL.18|poly [ADP-ribose] polymerase [EC:2.4.2.30]	gi|17510487|ref|NP_491072.1|	0	Poly(ADP-ribose) polymerase pme-1 [Caenorhabditis elegans]
cel-miR-243-5p	NM_063799.5	-31.1	0.005815	-29.43	177	R05H5.3	GO:0009792,	K17609|1|4.42e-109|310|cel:CELE_R05H5.3|nucleoredoxin [EC:1.8.1.8]	gi|17535459|ref|NP_496200.1|	3.67714e-108	Uncharacterized protein CELE_R05H5.3 [Caenorhabditis elegans]
cel-miR-243-5p	NR_072209.1	-27	0.014678	-26.47	157	B0198.6	-	-	-	-	-
cel-miR-243-5p	NM_074843.5	-25.9	0.776762	-45.2	298	cand-1	GO:0005634,GO:0005515,GO:0010265,GO:0051437,	K17263|1|0.0|2611|cel:CELE_Y102A5A.1|cullin-associated NEDD8-dissociated protein 1	gi|17566356|ref|NP_507244.1|	0	Cullin-associated NEDD8-dissociated protein 1 [Caenorhabditis elegans]
cel-miR-243-5p	NM_064334.4	-25.2	0.679332	-45.43	317	snf-5	GO:0005887,GO:0005328,GO:0006836,GO:0055085,	K05038|1|0.0|1511|cel:CELE_Y46G5A.30|solute carrier family 6 (neurotransmitter transporter, amino acid) member 5/7/9/14	gi|17535731|ref|NP_496735.1|	0	Transporter [Caenorhabditis elegans]
cel-miR-243-5p	NM_065342.4	-28.2	0.274672	-27.04	162	C46F11.4	GO:0004004,GO:0003676,GO:0005524,GO:0010501,GO:0000003,	K12835|1|0.0|1686|cel:CELE_C46F11.4|ATP-dependent RNA helicase DDX42 [EC:3.6.4.13]	gi|17552642|ref|NP_497743.1|	0	Uncharacterized protein CELE_C46F11.4 [Caenorhabditis elegans]
novel_mir6	NM_001348629.1	-30.5	0.18647	-27	169	lgc-45	GO:0030054,GO:0005886,GO:0016021,GO:0045202,GO:0005230,GO:0034220,	K05273|1|5.08e-134|424|bmy:Bm1_42380|glutamate receptor, anionic, other	gi|308495864|ref|XP_003110120.1|	0	CRE-LGC-45 protein [Caenorhabditis remanei]
novel_mir6	NM_060051.3	-29	0.129124	-27.1	182	ZK858.7	GO:0031515,GO:0030488,	K03256|1|0.0|900|cel:CELE_ZK858.7|tRNA (adenine-N(1)-)-methyltransferase non-catalytic subunit	gi|392886614|ref|NP_492452.3|	0	Uncharacterized protein CELE_ZK858.7 [Caenorhabditis elegans]
novel_mir6	NM_064083.5	-30	0.448685	-25.72	161	din-1	GO:0005634,GO:0003723,GO:0000166,GO:0030421,GO:0000398,GO:0000003,GO:0040027,GO:0006355,GO:0010171,GO:0019915,GO:0040026,GO:0009792,GO:0040018,	-	gi|71985482|ref|NP_496484.3|	0	Daf-12-interacting protein 1 [Caenorhabditis elegans]
novel_mir6	NM_001330837.1	-30	0.68335	-26.02	174	cdh-4	GO:0016021,GO:0005886,GO:0005509,GO:0007156,	K16506|1|0.0|8929|cel:CELE_F25F2.2|protocadherin Fat 1/2/3	gi|392894741|ref|NP_001254917.1|	0	Cadherin-4 [Caenorhabditis elegans]
novel_mir6	NM_001026328.2	-26.1	0.512324	-26.23	176	unc-73	GO:0030424,GO:0036194,GO:0005737,GO:0030676,GO:0048365,GO:0030838,GO:0035022,GO:0007411,GO:0043652,GO:0040028,GO:0016358,GO:0043547,GO:0018991,GO:1902474,GO:0040039,GO:0040012,GO:0035025,GO:0040018,GO:0009792,GO:0000910,GO:0014057,GO:0040035,GO:0048808,GO:0010171,GO:0008078,GO:0007413,GO:0030163,GO:0009306,GO:0032228,GO:0001764,GO:0045773,	K08810|1|0.0|1108|cel:CELE_F55C7.7|triple functional domain protein [EC:2.7.11.1]!K15048|4|4.73e-97|328|crg:105321818|kalirin [EC:2.7.11.1]	gi|71987162|ref|NP_001021499.1|	0	Uncharacterized protein CELE_F55C7.7 [Caenorhabditis elegans]
novel_mir6	NM_182101.3	-30	0.475648	-25.72	161	din-1	GO:0005634,GO:0003723,GO:0000166,GO:0030421,GO:0000398,GO:0000003,GO:0040027,GO:0006355,GO:0010171,GO:0019915,GO:0040026,GO:0009792,GO:0040018,	-	gi|32563720|ref|NP_871901.1|	0	Daf-12-interacting protein 1 [Caenorhabditis elegans]
novel_mir6	NM_001348628.1	-30.5	0.188808	-27	169	lgc-45	GO:0030054,GO:0005886,GO:0016021,GO:0045202,GO:0005230,GO:0034220,	K05273|1|7.06e-134|424|bmy:Bm1_42380|glutamate receptor, anionic, other	gi|308495864|ref|XP_003110120.1|	0	CRE-LGC-45 protein [Caenorhabditis remanei]
novel_mir6	NM_001026897.3	-30	0.431442	-25.72	161	din-1	GO:0005634,GO:0003723,GO:0000166,GO:0030421,GO:0000398,GO:0000003,GO:0040027,GO:0006355,GO:0010171,GO:0019915,GO:0040026,GO:0009792,GO:0040018,	-	gi|71985509|ref|NP_001022068.1|	0	Daf-12-interacting protein 1 [Caenorhabditis elegans]
novel_mir6	NM_076754.4	-26.9	0.346816	-25.51	166	rig-3	GO:0030424,GO:0045202,	K06491|1|1.97e-11|72.0|nvi:100123003|neural cell adhesion molecule	gi|17551128|ref|NP_509155.1|	0	neuRonal IGCAM [Caenorhabditis elegans]
novel_mir6	NM_001262583.1	-26.1	0.717311	-26.23	176	unc-73	GO:0030424,GO:0036194,GO:0005737,GO:0030676,GO:0048365,GO:0030838,GO:0035022,GO:0007411,GO:0043652,GO:0040028,GO:0016358,GO:0043547,GO:0018991,GO:1902474,GO:0040039,GO:0040012,GO:0035025,GO:0040018,GO:0009792,GO:0000910,GO:0014057,GO:0040035,GO:0048808,GO:0010171,GO:0008078,GO:0007413,GO:0030163,GO:0009306,GO:0032228,GO:0001764,GO:0045773,	K08810|1|0.0|1770|cel:CELE_F55C7.7|triple functional domain protein [EC:2.7.11.1]!K15048|4|7.07e-93|328|crg:105321818|kalirin [EC:2.7.11.1]	gi|392885272|ref|NP_001249512.1|	0	Uncharacterized protein CELE_F55C7.7 [Caenorhabditis elegans]
novel_mir6	NM_001348630.1	-30.5	0.161027	-27	169	lgc-45	GO:0030054,GO:0005886,GO:0016021,GO:0045202,GO:0005230,GO:0034220,	K05273|1|3.09e-135|424|bmy:Bm1_42380|glutamate receptor, anionic, other	gi|308495864|ref|XP_003110120.1|	0	CRE-LGC-45 protein [Caenorhabditis remanei]
novel_mir6	NM_073876.3	-27.1	0.568659	-25.08	178	him-17	GO:0000790,GO:0000712,GO:0006915,GO:0009792,GO:0051729,	-	gi|17561982|ref|NP_506277.1|	0	High Incidence of Males (increased X chromosome loss) [Caenorhabditis elegans]
novel_mir6	NM_001262584.1	-26.1	0.571165	-26.23	176	unc-73	GO:0030424,GO:0036194,GO:0005737,GO:0030676,GO:0048365,GO:0030838,GO:0035022,GO:0007411,GO:0043652,GO:0040028,GO:0016358,GO:0043547,GO:0018991,GO:1902474,GO:0040039,GO:0040012,GO:0035025,GO:0040018,GO:0009792,GO:0000910,GO:0014057,GO:0040035,GO:0048808,GO:0010171,GO:0008078,GO:0007413,GO:0030163,GO:0009306,GO:0032228,GO:0001764,GO:0045773,	K08810|1|0.0|1294|cel:CELE_F55C7.7|triple functional domain protein [EC:2.7.11.1]!K15048|4|3.00e-97|332|crg:105321818|kalirin [EC:2.7.11.1]	gi|392885274|ref|NP_001249513.1|	0	Uncharacterized protein CELE_F55C7.7 [Caenorhabditis elegans]
novel_mir6	NM_075086.3	-28.1	0.529569	-26.03	162	pgp-9	GO:0005887,GO:0042626,GO:0005524,GO:0015562,GO:0009792,GO:0055085,GO:0008152,	K05658|1|0.0|2677|cel:CELE_C47A10.1|ATP-binding cassette, subfamily B (MDR/TAP), member 1 [EC:3.6.3.44]	gi|17558664|ref|NP_507487.1|	0	P-GlycoProtein related [Caenorhabditis elegans]
novel_mir6	NM_001026327.2	-26.1	0.719333	-26.23	176	unc-73	GO:0030424,GO:0036194,GO:0005737,GO:0030676,GO:0048365,GO:0030838,GO:0035022,GO:0007411,GO:0043652,GO:0040028,GO:0016358,GO:0043547,GO:0018991,GO:1902474,GO:0040039,GO:0040012,GO:0035025,GO:0040018,GO:0009792,GO:0000910,GO:0014057,GO:0040035,GO:0048808,GO:0010171,GO:0008078,GO:0007413,GO:0030163,GO:0009306,GO:0032228,GO:0001764,GO:0045773,	K08810|1|0.0|1907|cel:CELE_F55C7.7|triple functional domain protein [EC:2.7.11.1]!K15048|4|9.18e-95|334|crg:105321818|kalirin [EC:2.7.11.1]	gi|71987150|ref|NP_001021498.1|	0	Uncharacterized protein CELE_F55C7.7 [Caenorhabditis elegans]
novel_mir6	NM_001026330.4	-26.1	0.576242	-26.23	176	unc-73	GO:0030424,GO:0036194,GO:0005737,GO:0030676,GO:0048365,GO:0030838,GO:0035022,GO:0007411,GO:0043652,GO:0040028,GO:0016358,GO:0043547,GO:0018991,GO:1902474,GO:0040039,GO:0040012,GO:0035025,GO:0040018,GO:0009792,GO:0000910,GO:0014057,GO:0040035,GO:0048808,GO:0010171,GO:0008078,GO:0007413,GO:0030163,GO:0009306,GO:0032228,GO:0001764,GO:0045773,	K08810|1|0.0|1254|cel:CELE_F55C7.7|triple functional domain protein [EC:2.7.11.1]!K15048|4|5.82e-96|329|crg:105321818|kalirin [EC:2.7.11.1]	gi|392885276|ref|NP_001021501.2|	0	Uncharacterized protein CELE_F55C7.7 [Caenorhabditis elegans]
novel_mir6	NM_063772.3	-29.6	0.008636	-26.91	174	flp-4	GO:0007218,	-	gi|17531979|ref|NP_496173.1|	4.17204e-61	FMRF-Like Peptide [Caenorhabditis elegans]
novel_mir6	NM_064084.6	-30	0.477814	-25.72	161	din-1	GO:0005634,GO:0003723,GO:0000166,GO:0030421,GO:0000398,GO:0000003,GO:0040027,GO:0006355,GO:0010171,GO:0019915,GO:0040026,GO:0009792,GO:0040018,	-	gi|32563718|ref|NP_496485.2|	0	Daf-12-interacting protein 1 [Caenorhabditis elegans]
novel_mir6	NM_001267377.1	-30	0.417339	-25.72	161	din-1	GO:0005634,GO:0003723,GO:0000166,GO:0030421,GO:0000398,GO:0000003,GO:0040027,GO:0006355,GO:0010171,GO:0019915,GO:0040026,GO:0009792,GO:0040018,	-	gi|392891852|ref|NP_001254306.1|	0	Daf-12-interacting protein 1 [Caenorhabditis elegans]
novel_mir6	NM_067706.4	-29.7	0.069356	-25.61	165	Y41D4B.11	GO:0018991,GO:0040035,GO:0006898,	-	gi|17543298|ref|NP_500107.1|	0	Uncharacterized protein CELE_Y41D4B.11 [Caenorhabditis elegans]
novel_mir6	NM_001026329.3	-26.1	0.567959	-26.23	176	unc-73	GO:0030424,GO:0036194,GO:0005737,GO:0030676,GO:0048365,GO:0030838,GO:0035022,GO:0007411,GO:0043652,GO:0040028,GO:0016358,GO:0043547,GO:0018991,GO:1902474,GO:0040039,GO:0040012,GO:0035025,GO:0040018,GO:0009792,GO:0000910,GO:0014057,GO:0040035,GO:0048808,GO:0010171,GO:0008078,GO:0007413,GO:0030163,GO:0009306,GO:0032228,GO:0001764,GO:0045773,	K08810|1|0.0|1155|cel:CELE_F55C7.7|triple functional domain protein [EC:2.7.11.1]!K15048|4|4.43e-96|328|crg:105321818|kalirin [EC:2.7.11.1]	gi|71987167|ref|NP_001021500.1|	0	Uncharacterized protein CELE_F55C7.7 [Caenorhabditis elegans]
cel-miR-8202-5p	NM_075424.1	-26.4	0.11355	-28.29	173	W04E12.2	GO:0016021,	-	gi|17565050|ref|NP_507825.1|	1.35102e-143	Uncharacterized protein CELE_W04E12.2 [Caenorhabditis elegans]
cel-miR-360-5p	NM_063741.4	-26.9	0.785501	-50.41	313	C05C10.2	GO:0005524,GO:0004386,GO:0008152,	K14326|1|0.0|3239|cel:CELE_C05C10.2|regulator of nonsense transcripts 1 [EC:3.6.4.-]	gi|17531515|ref|NP_496142.1|	0	Uncharacterized ATP-dependent helicase C05C10.2 [Caenorhabditis elegans]
cel-miR-360-5p	NM_076959.5	-26	0.594654	-25.16	164	K07E3.4	GO:0004329,GO:0005524,GO:0009396,	K07E3.4;|1|0.0|1315|cel:CELE_K07E3.4|Uncharacterized protein!K00288|1|0.0|1315|cel:CELE_K07E3.4|methylenetetrahydrofolate dehydrogenase (NADP+) / methenyltetrahydrofolate cyclohydrolase / formyltetrahydrofolate synthetase [EC:1.5.1.5 3.5.4.9 6.3.4.3]	gi|17568737|ref|NP_509361.1|	0	Uncharacterized protein CELE_K07E3.4 [Caenorhabditis elegans]
cel-miR-360-5p	NM_074458.4	-31.3	0.401598	-28.97	159	C06B8.7	GO:0016021,GO:0005044,GO:0006898,	K09624|1|1.06e-09|68.2|bfo:BRAFLDRAFT_155098|neurotrypsin [EC:3.4.21.-]!K00280|2|1.10e-09|66.6|cmk:103172198|lysyl oxidase-like protein 2/3/4 [EC:1.4.3.-]!K13912|5|3.01e-09|68.2|cmy:102947203|deleted in malignant brain tumors 1 protein	gi|25155109|ref|NP_506859.2|	0	Uncharacterized protein CELE_C06B8.7 [Caenorhabditis elegans]
cel-miR-360-5p	NM_063437.4	-27.7	0.787617	-25.27	171	pyr-1	GO:0004088,GO:0046872,GO:0016812,GO:0005524,GO:0004070,GO:0016597,GO:0006541,GO:0006207,	K11540|1|0.0|4579|cel:CELE_D2085.1|carbamoyl-phosphate synthase / aspartate carbamoyltransferase / dihydroorotase [EC:6.3.5.5 2.1.3.2 3.5.2.3]	gi|193204318|ref|NP_495838.2|	0	PYRimidine biosynthesis [Caenorhabditis elegans]
cel-miR-360-5p	NM_059632.5	-28.8	0.134936	-29.26	162	M05B5.4	GO:0008374,GO:0019915,GO:0006629,	K06129|1|0.0|867|cel:CELE_M05B5.4|lysophospholipase III [EC:3.1.1.5]	gi|17508407|ref|NP_492033.1|	0	Uncharacterized protein CELE_M05B5.4 [Caenorhabditis elegans]
cel-miR-360-5p	NM_076553.6	-29.7	0.083336	-26.73	162	T22B7.7	-	K17361|1|2.14e-37|145|cel:CELE_T07D3.9|acyl-coenzyme A thioesterase 9 [EC:3.1.2.-]	gi|17569955|ref|NP_508954.1|	0	Uncharacterized protein CELE_T22B7.7 [Caenorhabditis elegans]
cel-miR-360-5p	NM_058811.4	-27.7	0.197777	-25.18	158	inx-13	GO:0005921,GO:0005886,GO:0016021,GO:0040035,GO:0002119,GO:0006811,GO:0040011,	K03132|1|9.56e-86|280|tsp:Tsp_01015|transcription initiation factor TFIID subunit 7!K03443|2|4.70e-08|60.1|dre:567417|pannexin 1	gi|17509713|ref|NP_491212.1|	0	Innexin [Caenorhabditis elegans]
cel-miR-360-5p	NM_066248.4	-32.1	0.139108	-27.87	161	cls-1	GO:0005874,GO:0005737,GO:0040001,GO:0000003,GO:0051301,GO:0051231,GO:0030953,GO:0009792,GO:0040018,	K16578|1|0.0|2845|cel:CELE_C07H6.3|CLIP-associating protein 1/2	gi|17552110|ref|NP_498649.1|	0	Protein CLASP-1 [Caenorhabditis elegans]
cel-miR-360-5p	NM_001330907.1	-27.7	0.59802	-26.45	169	ajm-1	GO:0043296,GO:0016021,GO:0005913,GO:0044292,GO:0016327,GO:0008092,GO:0045216,GO:0040027,GO:0040011,GO:0009792,GO:0008406,	K00476|1|4.14e-19|99.4|xma:102218642|aspartate beta-hydroxylase [EC:1.14.11.16]	gi|25148106|ref|NP_741868.1|	0	Apical Junction Molecule [Caenorhabditis elegans]
cel-miR-360-5p	NM_001262849.1	-28.7	0.164775	-26.36	155	lfe-2	GO:0008440,GO:0016310,GO:0030728,	K00911|1|0.0|904|cel:CELE_C46H11.4|1D-myo-inositol-triphosphate 3-kinase [EC:2.7.1.127]	gi|392885509|ref|NP_001249778.1|	0	Let-23 Fertility Effector/regulator [Caenorhabditis elegans]
cel-miR-360-5p	NM_001029472.2	-28.5	0.282286	-27.99	162	add-1	GO:0005856,GO:0005737,GO:0014069,GO:0005886,GO:0051015,GO:0051016,GO:0097120,GO:0007616,GO:2000249,GO:0007614,	K18622|1|0.0|1390|cel:CELE_F39C12.2|adducin	gi|71989560|ref|NP_001024643.1|	0	ADDucin [Caenorhabditis elegans]
cel-miR-360-5p	NM_001029471.1	-28.5	0.267836	-27.99	162	add-1	GO:0005856,GO:0005737,GO:0014069,GO:0005886,GO:0051015,GO:0051016,GO:0097120,GO:0007616,GO:2000249,GO:0007614,	K18622|1|0.0|1357|cel:CELE_F39C12.2|adducin	gi|71989555|ref|NP_001024642.1|	0	Adducin-related protein 1 [Caenorhabditis elegans]
cel-miR-360-5p	NM_170941.6	-26.7	0.583714	-25.06	156	apg-1	GO:0030121,GO:0008565,GO:0030276,GO:0016192,GO:0045176,GO:0009306,GO:0002119,GO:0040011,GO:0006886,GO:0009792,	K12391|1|0.0|1720|cel:CELE_Y105E8A.9|AP-1 complex subunit gamma-1	gi|25145450|ref|NP_740937.1|	0	AdaPtin, Gamma chain (clathrin associated complex) [Caenorhabditis elegans]
cel-miR-360-5p	NM_063740.4	-26.9	0.78592	-50.41	313	C05C10.2	GO:0005524,GO:0004386,GO:0008152,	K14326|1|0.0|3250|cel:CELE_C05C10.2|regulator of nonsense transcripts 1 [EC:3.6.4.-]	gi|17531513|ref|NP_496141.1|	0	Uncharacterized protein CELE_C05C10.2 [Caenorhabditis elegans]
cel-miR-360-5p	NM_001025878.5	-28.7	0.159383	-26.36	155	lfe-2	GO:0008440,GO:0016310,GO:0030728,	K00911|1|0.0|903|cel:CELE_C46H11.4|1D-myo-inositol-triphosphate 3-kinase [EC:2.7.1.127]	gi|71981990|ref|NP_001021049.1|	0	Let-23 Fertility Effector/regulator [Caenorhabditis elegans]
cel-miR-360-5p	NM_001029469.2	-28.5	0.287831	-27.99	162	add-1	GO:0005856,GO:0005737,GO:0014069,GO:0005886,GO:0051015,GO:0051016,GO:0097120,GO:0007616,GO:2000249,GO:0007614,	K18622|1|0.0|1394|cel:CELE_F39C12.2|adducin	gi|71989544|ref|NP_001024640.1|	0	Adducin-related protein 1 [Caenorhabditis elegans]
cel-miR-360-5p	NM_001026666.4	-28	0.260746	-25.92	165	gpi-1	GO:0004347,GO:0008340,GO:0006094,GO:0009792,GO:0006096,	K01810|1|0.0|1141|cel:CELE_Y87G2A.8|glucose-6-phosphate isomerase [EC:5.3.1.9]	gi|71996708|ref|NP_001021838.1|	0	Glucose-6-phosphate isomerase [Caenorhabditis elegans]
cel-miR-360-5p	NM_076960.3	-26	0.594654	-25.16	164	K07E3.4	GO:0004329,GO:0005524,GO:0009396,	K07E3.4;|1|0.0|1315|cel:CELE_K07E3.4|Uncharacterized protein!K00288|1|0.0|1315|cel:CELE_K07E3.4|methylenetetrahydrofolate dehydrogenase (NADP+) / methenyltetrahydrofolate cyclohydrolase / formyltetrahydrofolate synthetase [EC:1.5.1.5 3.5.4.9 6.3.4.3]	gi|17568737|ref|NP_509361.1|	0	Uncharacterized protein CELE_K07E3.4 [Caenorhabditis elegans]
cel-miR-360-5p	NM_001025877.5	-28.7	0.131367	-26.36	155	lfe-2	GO:0008440,GO:0016310,GO:0030728,	K00911|1|0.0|759|cel:CELE_C46H11.4|1D-myo-inositol-triphosphate 3-kinase [EC:2.7.1.127]	gi|71981984|ref|NP_001021048.1|	0	Let-23 Fertility Effector/regulator [Caenorhabditis elegans]
cel-miR-360-5p	NM_070853.1	-29.8	0.051574	-25.47	161	K06H6.2	GO:0016021,	-	gi|17562258|ref|NP_503254.1|	0	Uncharacterized protein CELE_K06H6.2 [Caenorhabditis elegans]
cel-miR-360-5p	NM_001265327.1	-29.4	0.023075	-26.08	167	Y71A12B.25	-	-	gi|392887704|ref|NP_001252256.1|	1.10637e-109	Uncharacterized protein CELE_Y71A12B.25 [Caenorhabditis elegans]
cel-miR-360-5p	NM_001129246.2	-29.7	0.091032	-27.46	162	T07A5.7	-	-	gi|392896424|ref|NP_001122718.2|	0	Uncharacterized protein CELE_T07A5.7 [Caenorhabditis elegans]
cel-miR-360-5p	NM_077155.4	-26.3	0.541858	-25.57	167	lgc-4	GO:0030054,GO:0005892,GO:0045211,GO:0015464,GO:0042166,GO:0098655,GO:0007271,GO:0099565,	K05312|1|5.37e-114|356|obi:106881121|nicotinic acetylcholine receptor, invertebrate	gi|392926831|ref|NP_509556.4|	0	Ligand-gated ion channel 4 [Caenorhabditis elegans]
cel-miR-360-5p	NM_072778.6	-29.2	0.240755	-25.98	159	natc-1	GO:0031417,GO:0004596,GO:0008340,GO:1990359,GO:1990169,GO:0040024,GO:0009408,GO:1990170,GO:1901562,GO:0006898,GO:0009792,GO:0006474,	K20823|1|0.0|1672|cel:CELE_T23B12.4|N-alpha-acetyltransferase 35, NatC auxiliary subunit	gi|17564588|ref|NP_505179.1|	0	N-alpha-AcetylTransferase C complex subunit [Caenorhabditis elegans]
cel-miR-360-5p	NM_073503.5	-30.5	0.080946	-26.98	169	zipt-21	GO:0005887,GO:0005385,GO:0006882,GO:0071578,	K14720|1|3.28e-38|149|cel:CELE_Y55F3BL.2|solute carrier family 39 (zinc transporter), member 14	gi|32566718|ref|NP_505904.2|	0	Uncharacterized protein CELE_T11F9.2 [Caenorhabditis elegans]
cel-miR-360-5p	NM_001330905.1	-27.7	0.733034	-26.45	169	ajm-1	GO:0043296,GO:0016021,GO:0005913,GO:0044292,GO:0016327,GO:0008092,GO:0045216,GO:0040027,GO:0040011,GO:0009792,GO:0008406,	K00476|1|8.89e-21|105|xma:102218642|aspartate beta-hydroxylase [EC:1.14.11.16]	gi|25148106|ref|NP_741868.1|	0	Apical Junction Molecule [Caenorhabditis elegans]
cel-miR-360-5p	NM_001269524.1	-29.1	0.119553	-28.64	168	papl-1	GO:0046872,GO:0003993,GO:0016311,GO:0009792,	K01113|1|1.14e-61|209|cel:CELE_Y105C5B.3|alkaline phosphatase D [EC:3.1.3.1]!K05734|3|8.35e-19|93.6|gja:107116363|p21-activated kinase 4 [EC:2.7.11.1]	gi|392921259|ref|NP_001256452.1|	0	Purple acid phosphatase [Caenorhabditis elegans]
cel-miR-360-5p	NM_001029468.2	-28.5	0.266619	-27.99	162	add-1	GO:0005856,GO:0005737,GO:0014069,GO:0005886,GO:0051015,GO:0051016,GO:0097120,GO:0007616,GO:2000249,GO:0007614,	K18622|1|0.0|1423|cel:CELE_F39C12.2|adducin	gi|71989541|ref|NP_001024639.1|	0	Adducin-related protein 1 [Caenorhabditis elegans]
cel-miR-360-5p	NM_076187.4	-31.9	0.05656	-28.77	170	cht-1	GO:0005737,GO:0005576,GO:0004568,GO:0008061,GO:0009792,GO:0006032,GO:0000272,GO:0009620,	K01183|1|0.0|1269|cel:CELE_C04F6.3|chitinase [EC:3.2.1.14]	gi|17551250|ref|NP_508588.1|	0	Probable endochitinase [Caenorhabditis elegans]
cel-miR-360-5p	NM_068874.1	-28.8	0.094261	-26.9	156	C46A5.6	-	-	gi|17539224|ref|NP_501275.1|	0	Uncharacterized protein CELE_C46A5.6 [Caenorhabditis elegans]
cel-miR-360-5p	NM_001026667.5	-28	0.278117	-25.92	165	gpi-1	GO:0004347,GO:0008340,GO:0006094,GO:0009792,GO:0006096,	K01810|1|0.0|1211|cel:CELE_Y87G2A.8|glucose-6-phosphate isomerase [EC:5.3.1.9]	gi|71996708|ref|NP_001021838.1|	0	Glucose-6-phosphate isomerase [Caenorhabditis elegans]
cel-miR-360-5p	NM_001262850.1	-28.7	0.158136	-26.36	155	lfe-2	GO:0008440,GO:0016310,GO:0030728,	K00911|1|0.0|907|cel:CELE_C46H11.4|1D-myo-inositol-triphosphate 3-kinase [EC:2.7.1.127]	gi|392885511|ref|NP_001249779.1|	0	Let-23 Fertility Effector/regulator [Caenorhabditis elegans]
cel-miR-360-5p	NM_071477.6	-25.8	0.36198	-25.02	163	Y73C8B.3	-	-	gi|970936935|ref|NP_503878.2|	0	Uncharacterized protein CELE_Y73C8B.3 [Caenorhabditis elegans]
cel-miR-360-5p	NM_074700.1	-29	0.356039	-45.11	323	gcy-20	-	K01769|1|0.0|2313|cel:CELE_F21H7.9|guanylate cyclase, other [EC:4.6.1.2]!K12323|3|0.0|1358|cel:CELE_W03F11.2|atrial natriuretic peptide receptor A [EC:4.6.1.2]	gi|17561802|ref|NP_507101.1|	0	Receptor-type guanylate cyclase gcy-20 [Caenorhabditis elegans]
cel-miR-360-5p	NM_001330906.1	-27.7	0.672094	-26.45	169	ajm-1	GO:0043296,GO:0016021,GO:0005913,GO:0044292,GO:0016327,GO:0008092,GO:0045216,GO:0040027,GO:0040011,GO:0009792,GO:0008406,	K00476|1|8.54e-20|102|xma:102218642|aspartate beta-hydroxylase [EC:1.14.11.16]	gi|17568589|ref|NP_509537.1|	0	Apical Junction Molecule [Caenorhabditis elegans]
cel-miR-360-5p	NM_170823.1	-28.9	0.079602	-26.63	157	srbc-64	GO:0016021,GO:1990075,GO:0004930,GO:0008355,GO:0040024,GO:0007186,	-	gi|25151191|ref|NP_740807.1|	0	Serpentine Receptor, class BC (class B-like) [Caenorhabditis elegans]
cel-miR-360-5p	NM_071476.1	-31.1	0.045013	-27.17	158	lag-2	GO:0032809,GO:0005887,GO:0031253,GO:0043055,GO:0050954,GO:0007638,GO:0042078,GO:0040028,GO:0040020,GO:0019915,GO:0042127,GO:0006898,GO:0001708,GO:0007154,GO:0008406,	K06051|1|1.61e-16|85.9|bmy:Bm1_56170|delta!K06052|3|3.02e-10|67.8|shr:100931367|jagged	gi|17566232|ref|NP_503877.1|	0	Protein lag-2 [Caenorhabditis elegans]
cel-miR-360-5p	NM_076991.6	-29.9	0.155697	-28.44	162	kqt-2	GO:0008076,GO:0005251,GO:0071805,	K04926|1|7.41e-45|175|cel:CELE_Y54G9A.3|potassium voltage-gated channel KQT-like subfamily member 1!K04930|5|1.17e-39|162|clv:102084970|potassium voltage-gated channel KQT-like subfamily member 5	gi|392926648|ref|NP_509392.3|	0	potassium channel, KvQLT family [Caenorhabditis elegans]
cel-miR-360-5p	NM_001029470.2	-28.5	0.275897	-27.99	162	add-1	GO:0005856,GO:0005737,GO:0014069,GO:0005886,GO:0051015,GO:0051016,GO:0097120,GO:0007616,GO:2000249,GO:0007614,	K18622|1|0.0|1393|cel:CELE_F39C12.2|adducin	gi|71989550|ref|NP_001024641.1|	0	Adducin-related protein 1 [Caenorhabditis elegans]
cel-miR-360-5p	NM_001129557.2	-29.5	0.282453	-28.28	167	ipla-3	GO:0006629,	K16343|1|0.0|2187|cel:CELE_W07A8.2|calcium-independent phospholipase A2 [EC:3.1.1.4]!K01047|2|0.0|1691|cbr:CBG05582|secretory phospholipase A2 [EC:3.1.1.4]	gi|193208905|ref|NP_001123029.1|	0	Intracelllar PhosphoLipase A family [Caenorhabditis elegans]
cel-miR-360-5p	NM_058559.6	-26.1	0.452561	-25.33	155	eif-2gamma	GO:0005622,GO:0003743,GO:0003924,GO:0005525,GO:0001731,GO:0000003,GO:0010171,GO:0002119,GO:0040011,GO:0009792,GO:0040018,	K03242|1|0.0|963|cel:CELE_Y39G10AR.8|translation initiation factor 2 subunit 3	gi|17509919|ref|NP_490960.1|	0	Uncharacterized protein CELE_Y39G10AR.8 [Caenorhabditis elegans]
cel-miR-360-5p	NM_001262847.1	-28.7	0.15439	-26.36	155	lfe-2	GO:0008440,GO:0016310,GO:0030728,	K00911|1|0.0|939|cel:CELE_C46H11.4|1D-myo-inositol-triphosphate 3-kinase [EC:2.7.1.127]	gi|392885506|ref|NP_001249776.1|	0	Let-23 Fertility Effector/regulator [Caenorhabditis elegans]
cel-miR-360-5p	NM_059909.3	-31.9	0.033357	-29.06	160	K02B12.7	GO:0005096,GO:0043547,	K02B12.7;|1|0.0|869|cel:CELE_K02B12.7|Uncharacterized protein!K12492|1|0.0|869|cel:CELE_K02B12.7|ADP-ribosylation factor GTPase-activating protein 1	gi|17508013|ref|NP_492310.1|	0	Uncharacterized protein CELE_K02B12.7 [Caenorhabditis elegans]
cel-miR-360-5p	NM_001330904.1	-27.7	0.740539	-26.45	169	ajm-1	GO:0043296,GO:0016021,GO:0005913,GO:0044292,GO:0016327,GO:0008092,GO:0045216,GO:0040027,GO:0040011,GO:0009792,GO:0008406,	K00476|1|7.99e-21|105|xma:102218642|aspartate beta-hydroxylase [EC:1.14.11.16]	gi|17568591|ref|NP_509536.1|	0	Apical Junction Molecule [Caenorhabditis elegans]
cel-miR-360-5p	NM_001025876.3	-28.7	0.173036	-26.36	155	lfe-2	GO:0008440,GO:0016310,GO:0030728,	K00911|1|0.0|670|cel:CELE_C46H11.4|1D-myo-inositol-triphosphate 3-kinase [EC:2.7.1.127]	gi|71981980|ref|NP_001021047.1|	0	Let-23 Fertility Effector/regulator [Caenorhabditis elegans]
cel-miR-360-5p	NM_068300.2	-27.6	0.175546	-26.15	163	srm-2	GO:0005887,GO:0038022,GO:0050911,GO:0007186,GO:0042048,	K08473|1|0.0|681|cel:CELE_T28H11.3|nematode chemoreceptor	gi|115534375|ref|NP_500701.2|	0	Serpentine Receptor, class M [Caenorhabditis elegans]
cel-miR-360-5p	NM_001276969.1	-29.6	0.038824	-26.63	166	T10H4.13	-	-	gi|453232606|ref|NP_001263898.1|	4.87596e-164	Uncharacterized protein CELE_T10H4.13 [Caenorhabditis elegans]
cel-miR-360-5p	NM_070034.4	-29.4	0.094273	-27.65	154	inx-6	GO:0016021,GO:0005921,GO:0005886,GO:0055077,GO:0006811,GO:0055085,	K03132|1|3.97e-38|150|tsp:Tsp_01015|transcription initiation factor TFIID subunit 7	gi|17541112|ref|NP_502435.1|	0	Innexin-6 [Caenorhabditis elegans]
cel-miR-360-5p	NM_001269731.1	-29.3	0.064547	-26.83	166	M01B2.13	-	-	gi|392922129|ref|NP_001256660.1|	0	Uncharacterized protein CELE_M01B2.13 [Caenorhabditis elegans]
cel-miR-360-5p	NM_001269523.1	-29.1	0.131802	-28.64	168	papl-1	GO:0046872,GO:0003993,GO:0016311,GO:0009792,	K01113|1|2.49e-67|225|cel:CELE_Y105C5B.3|alkaline phosphatase D [EC:3.1.3.1]!K05734|3|7.31e-19|94.0|gja:107116363|p21-activated kinase 4 [EC:2.7.11.1]	gi|392921259|ref|NP_001256452.1|	0	Purple acid phosphatase [Caenorhabditis elegans]
cel-miR-360-5p	NM_067223.6	-27.4	0.603086	-25.14	165	ani-1	-	K18621|1|0.0|2404|cel:CELE_Y49E10.19|actin-binding protein anillin	gi|71994505|ref|NP_499624.2|	0	Anillin-like protein 1 [Caenorhabditis elegans]
cel-miR-360-5p	NM_001322671.1	-27.1	0.450684	-25.79	157	acd-2	GO:0016021,GO:0005272,GO:0035725,	K03440|1|0.0|1459|cel:CELE_C24G7.4|acid-sensing ion channel, other	gi|17505689|ref|NP_491293.1|	0	Uncharacterized protein CELE_C24G7.4 [Caenorhabditis elegans]
cel-miR-360-5p	NM_182340.3	-30.5	0.082421	-26.98	169	zipt-21	GO:0005887,GO:0005385,GO:0006882,GO:0071578,	K14720|1|3.52e-38|149|cel:CELE_Y55F3BL.2|solute carrier family 39 (zinc transporter), member 14	gi|32566720|ref|NP_872140.1|	0	Uncharacterized protein CELE_T11F9.2 [Caenorhabditis elegans]
cel-miR-360-5p	NM_001028907.2	-25.1	0.469622	-26.1	170	R11G10.3	GO:0016021,	-	gi|193208495|ref|NP_001024078.2|	0	Uncharacterized protein CELE_R11G10.3 [Caenorhabditis elegans]
cel-miR-2212-5p	NM_075746.2	-27.4	0.325327	-25.47	163	npr-19	GO:0016021,GO:0004930,GO:0007186,	K04205|1|1.85e-09|64.3|adf:107340525|neuropeptide Y receptor type 2!K04277|2|2.10e-09|64.7|xla:108716878|cannabinoid receptor 1!K04160|4|4.93e-09|62.8|cmk:103186492|5-hydroxytryptamine receptor 4	gi|392925225|ref|NP_508147.2|	0	NeuroPeptide Receptor family [Caenorhabditis elegans]
cel-miR-2212-5p	NM_065983.2	-26	0.738579	-42.3	305	C56G2.5	GO:0005634,GO:0004674,GO:0005524,GO:0018105,GO:0035556,	K06071|1|9.83e-49|189|tru:101069685|protein kinase N [EC:2.7.11.13]!K04456|2|1.36e-46|175|spu:582897|RAC serine/threonine-protein kinase [EC:2.7.11.1]!K18052|3|1.07e-45|179|sasa:106576193|novel protein kinase C theta type [EC:2.7.11.13]!K13304|4|1.22e-45|174|mze:101472799|serum/glucocorticoid-regulated kinase 3 [EC:2.7.11.1]	gi|392895263|ref|NP_498384.2|	0	Non-specific serine/threonine protein kinase [Caenorhabditis elegans]
cel-miR-2212-5p	NM_001277041.1	-30.3	0.414336	-29.49	175	F13D2.1	GO:0005615,GO:0004866,GO:0010951,	K06530|1|3.88e-08|63.9|crg:105327092|CD109 antigen	gi|453232858|ref|NP_001263970.1|	0	Uncharacterized protein CELE_F13D2.1 [Caenorhabditis elegans]
cel-miR-2212-5p	NM_182010.3	-30.7	0.148342	-26.23	165	haf-9	GO:0016021,GO:0005765,GO:0042626,GO:0005524,GO:0015197,GO:0055085,GO:0007041,GO:0035264,GO:0015833,GO:0016246,	K05656|1|0.0|1375|cel:CELE_ZK484.2|ATP-binding cassette, subfamily B (MDR/TAP), member 9	gi|32563727|ref|NP_871810.1|	0	HAlF transporter (PGP related) [Caenorhabditis elegans]
cel-miR-2212-5p	NM_062207.2	-28.9	0.032015	-26.15	161	F19B10.3	-	-	gi|970937016|ref|NP_494608.2|	3.86593e-85	Uncharacterized protein CELE_F19B10.3 [Caenorhabditis elegans]
cel-miR-2212-5p	NM_066993.2	-29.2	0.370854	-26.69	172	vps-50	-	-	gi|71983277|ref|NP_499394.2|	0	VESicle-Associated [Caenorhabditis elegans]
cel-miR-2212-5p	NM_069125.3	-28.9	0.118232	-25.69	169	col-117	GO:0016021,GO:0005581,GO:0042302,GO:0010171,GO:0002119,GO:0040011,GO:0019915,GO:0006898,	K06237|1|4.86e-14|77.8|phu:Phum_PHUM569140|collagen, type IV, alpha	gi|17539484|ref|NP_501527.1|	0	COLlagen [Caenorhabditis elegans]
cel-miR-2212-5p	NM_068580.6	-26	0.455371	-25.81	157	htp-2	GO:0000800,GO:0009792,GO:0045132,	-	gi|71999525|ref|NP_500981.3|	0	Him-Three Paralog [Caenorhabditis elegans]
cel-miR-2212-5p	NM_074292.4	-28.7	0.132519	-26.95	160	T01C3.9	-	-	gi|17563676|ref|NP_506693.1|	0	Uncharacterized protein CELE_T01C3.9 [Caenorhabditis elegans]
cel-miR-2212-5p	NM_077518.4	-29.4	0.623485	-30.66	166	T25C12.3	-	K17341|1|7.83e-10|69.3|lcm:106705997|hemicentin!K06721|2|3.80e-08|62.4|cge:100768594|C-type lectin domain family 10 member A!K10064|3|2.14e-07|60.1|ocu:100347178|asialoglycoprotein receptor 2	gi|193211092|ref|NP_509919.2|	0	Uncharacterized protein CELE_T25C12.3 [Caenorhabditis elegans]
cel-miR-2212-5p	NM_069141.3	-29.5	0.13405	-26.05	168	oma-1	GO:0005813,GO:0043186,GO:0003730,GO:0046872,GO:0005515,GO:0001556,GO:0006915,GO:0009792,	K15308|1|8.81e-36|139|loa:LOAG_08793|tristetraprolin!K18753|2|1.72e-18|84.0|hro:HELRODRAFT_64152|butyrate response factor 1	gi|17538616|ref|NP_501542.1|	0	Uncharacterized protein CELE_C09G9.6 [Caenorhabditis elegans]
cel-miR-2212-5p	NM_001264284.1	-25.1	0.704412	-26.01	160	tba-1	GO:0072686,GO:0030424,GO:0072687,GO:0005874,GO:0030425,GO:0043025,GO:0005737,GO:0003924,GO:0005200,GO:0005525,GO:0006915,GO:0032465,GO:0035046,GO:0007052,GO:0002119,GO:0008152,GO:0040039,GO:0009792,GO:0000132,	K07374|1|0.0|941|cel:CELE_F26E4.8|tubulin alpha	gi|392886819|ref|NP_001251212.1|	0	TuBulin, Alpha [Caenorhabditis elegans]
cel-miR-2212-5p	NR_072904.1	-31.4	0.001257	-29.21	163	C06G1.17	-	-	-	-	-
cel-miR-2212-5p	NM_059353.4	-30.7	0.18364	-26.23	165	haf-9	GO:0016021,GO:0005765,GO:0042626,GO:0005524,GO:0015197,GO:0055085,GO:0007041,GO:0035264,GO:0015833,GO:0016246,	K05656|1|0.0|1679|cel:CELE_ZK484.2|ATP-binding cassette, subfamily B (MDR/TAP), member 9	gi|17511077|ref|NP_491754.1|	0	HAlF transporter (PGP related) [Caenorhabditis elegans]
cel-miR-2212-5p	NM_001277040.1	-30.3	0.409937	-29.49	175	F13D2.1	GO:0005615,GO:0004866,GO:0010951,	K06530|1|3.75e-08|63.9|crg:105327092|CD109 antigen	gi|453232856|ref|NP_001263969.1|	0	Uncharacterized protein CELE_F13D2.1 [Caenorhabditis elegans]
cel-miR-2212-5p	NM_066859.4	-29.6	0.513234	-28.12	164	chc-1	GO:0072686,GO:0030132,GO:0030130,GO:0005938,GO:0016324,GO:0045334,GO:0009898,GO:0005515,GO:0005198,GO:0045176,GO:0008340,GO:0042594,GO:0006915,GO:0000003,GO:0002119,GO:0030866,GO:0006898,GO:0006886,GO:0030163,GO:0009792,	K04646|1|0.0|3505|cel:CELE_T20G5.1|clathrin heavy chain	gi|17555172|ref|NP_499260.1|	0	Probable clathrin heavy chain 1 [Caenorhabditis elegans]
cel-miR-2212-5p	NM_074089.2	-27.3	0.165162	-47.34	312	F58D12.1	-	-	gi|392921706|ref|NP_506490.2|	2.7676e-154	Uncharacterized protein CELE_F58D12.1 [Caenorhabditis elegans]
cel-miR-2212-5p	NM_059696.1	-29	0.417655	-25.38	168	ZK524.4	GO:0005737,GO:0005634,GO:0005524,GO:0004674,GO:0035556,GO:0006468,	K08802|1|0.0|2097|cel:CELE_ZK524.4|SNF related kinase [EC:2.7.11.1]	gi|17511097|ref|NP_492097.1|	0	Uncharacterized protein CELE_ZK524.4 [Caenorhabditis elegans]
cel-miR-2212-5p	NM_001026691.3	-26.8	0.732641	-45.68	305	pmr-1	GO:0005887,GO:0000139,GO:0015410,GO:0046872,GO:0005388,GO:0005524,GO:0010042,GO:0006874,GO:0030334,GO:0051592,GO:0071421,GO:0070588,GO:0008152,GO:0006979,	K01537|1|0.0|2023|cel:CELE_ZK256.1|Ca2+-transporting ATPase [EC:3.6.3.8]	gi|71997275|ref|NP_001021862.1|	0	Calcium-transporting ATPase [Caenorhabditis elegans]
cel-miR-2212-5p	NM_071490.1	-34.3	0.012051	-31.24	169	srj-8	GO:0005887,GO:0038022,GO:0050911,GO:0007186,GO:0042048,	K08473|1|0.0|706|cel:CELE_T28A11.9|nematode chemoreceptor	gi|17564836|ref|NP_503891.1|	0	Serpentine Receptor, class J [Caenorhabditis elegans]
cel-miR-2212-5p	NM_062713.5	-30.4	0.131868	-26.91	167	eif-2D	GO:0003743,GO:0006413,	K15027|1|0.0|1137|cel:CELE_C25H3.4|translation initiation factor 2D	gi|392890110|ref|NP_495114.3|	0	Uncharacterized protein CELE_C25H3.4 [Caenorhabditis elegans]
cel-miR-2212-5p	NM_076346.4	-29.2	0.119629	-26.61	167	col-165	GO:0016021,GO:0005581,GO:0042302,	K10599|1|8.85e-40|154|tsp:Tsp_00442|pre-mRNA-processing factor 19 [EC:2.3.2.27]!K08202|2|3.93e-24|108|tsp:Tsp_05167|MFS transporter, OCT family, solute carrier family 22 (organic cation transporter), member 4/5!K06236|3|2.85e-12|73.2|cmy:102934260|collagen, type I, alpha!K19721|5|2.95e-10|67.0|amj:102567831|collagen, type V/XI/XXIV/XXVII, alpha	gi|17551704|ref|NP_508747.1|	0	COLlagen [Caenorhabditis elegans]
cel-miR-2212-5p	NM_059064.7	-29.9	0.300432	-27.36	171	rga-6	GO:0050832,GO:0007165,	K20631|1|0.0|2018|cel:CELE_C01F4.2|Rho GTPase-activating protein 6	gi|25143973|ref|NP_491465.2|	0	Rho GTPase Activating protein [Caenorhabditis elegans]
cel-miR-2212-5p	NM_058562.2	-29.8	0.190253	-26.46	160	Y39G10AR.15	-	-	gi|392884923|ref|NP_490963.2|	0	Uncharacterized protein CELE_Y39G10AR.15 [Caenorhabditis elegans]
cel-miR-2212-5p	NM_072103.1	-29.1	0.25859	-25.35	162	K09H11.4	-	-	gi|17562452|ref|NP_504504.1|	0	Uncharacterized protein CELE_K09H11.4 [Caenorhabditis elegans]
cel-miR-2212-5p	NM_076150.5	-33.9	0.160309	-31.04	173	F28B4.3	-	K10057|1|2.84e-08|62.0|cge:100771718|C-type lectin domain family 4 member A!K01691|2|4.78e-08|63.2|aag:AaeL_AAEL011386|WNT inhibitory factor 1!K13050|3|5.29e-08|63.9|bfo:BRAFLDRAFT_107715|proprotein convertase subtilisin/kexin type 9 [EC:3.4.21.-]!K10070|5|9.67e-08|60.1|shr:100931680|C-type lectin domain family 1 member B	gi|17567355|ref|NP_508551.1|	0	Uncharacterized protein CELE_F28B4.3 [Caenorhabditis elegans]
cel-miR-2212-5p	NM_001264283.1	-25.1	0.708812	-26.01	160	tba-1	GO:0072686,GO:0030424,GO:0072687,GO:0005874,GO:0030425,GO:0043025,GO:0005737,GO:0003924,GO:0005200,GO:0005525,GO:0006915,GO:0032465,GO:0035046,GO:0007052,GO:0002119,GO:0008152,GO:0040039,GO:0009792,GO:0000132,	K07374|1|0.0|952|cel:CELE_F26E4.8|tubulin alpha	gi|392886819|ref|NP_001251212.1|	0	TuBulin, Alpha [Caenorhabditis elegans]
cel-miR-2212-5p	NM_001026689.3	-26.8	0.702495	-45.68	305	pmr-1	GO:0005887,GO:0000139,GO:0015410,GO:0046872,GO:0005388,GO:0005524,GO:0010042,GO:0006874,GO:0030334,GO:0051592,GO:0071421,GO:0070588,GO:0008152,GO:0006979,	K01537|1|0.0|1865|cel:CELE_ZK256.1|Ca2+-transporting ATPase [EC:3.6.3.8]	gi|71997275|ref|NP_001021862.1|	0	Calcium-transporting ATPase [Caenorhabditis elegans]
cel-miR-2212-5p	NM_075890.4	-29.3	0.192747	-25.41	156	K06A9.2	-	K06A9.2;|1|0.0|1080|cel:CELE_K06A9.2|Uncharacterized protein!K10263|1|0.0|1080|cel:CELE_K06A9.2|F-box and WD-40 domain protein 5	gi|25151037|ref|NP_508291.2|	0	Uncharacterized protein CELE_K06A9.2 [Caenorhabditis elegans]
cel-miR-2212-5p	NM_069126.3	-28.9	0.118232	-25.69	169	col-3	GO:0016021,GO:0005581,GO:0042302,GO:0010171,GO:0002119,GO:0040011,GO:0019915,GO:0006898,	K06237|1|4.86e-14|77.8|phu:Phum_PHUM569140|collagen, type IV, alpha	gi|17539484|ref|NP_501527.1|	0	COLlagen [Caenorhabditis elegans]
cel-miR-2212-5p	NM_064763.1	-28	0.156917	-26.07	151	F40G9.8	GO:0016021,	K05096|1|3.71e-22|100|cbr:CBG17536|FMS-like tyrosine kinase 1 [EC:2.7.10.1]	gi|17553350|ref|NP_497164.1|	0	Uncharacterized protein CELE_F40G9.8 [Caenorhabditis elegans]
cel-miR-2212-5p	NR_071229.1	-27.3	0.049231	-26.11	153	C34H3.6	-	-	-	-	-
cel-miR-55b	NM_076536.3	-26.7	0.438414	-26.24	158	mboa-3	GO:0016021,GO:0016746,GO:0008152,	K13517|1|0.0|995|cel:CELE_C54G7.2|lysophospholipid acyltransferase 1/2 [EC:2.3.1.51 2.3.1.-]	gi|17551176|ref|NP_508937.1|	0	Membrane Bound O-Acyl transferase, MBOAT [Caenorhabditis elegans]
cel-miR-55b	NM_060158.5	-28.5	0.163366	-26.09	170	T05F1.5	-	-	gi|17508883|ref|NP_492559.1|	0	Uncharacterized protein CELE_T05F1.5 [Caenorhabditis elegans]
cel-miR-55b	NM_001276744.1	-28.3	0.562206	-26.64	158	ptp-3	GO:0016021,GO:0005912,GO:0045202,GO:0005886,GO:0005001,GO:0035418,GO:0001764,GO:0097402,GO:0035335,GO:0007369,GO:0007416,GO:0008045,GO:0008544,GO:0000003,GO:0010172,	K05695|1|0.0|2390|cel:CELE_C09D8.1|receptor-type tyrosine-protein phosphatase F [EC:3.1.3.48]	gi|453231840|ref|NP_001263673.1|	0	Protein-tyrosine-phosphatase [Caenorhabditis elegans]
cel-miR-55b	NM_001267341.1	-28.3	0.732507	-26.64	158	ptp-3	GO:0016021,GO:0005912,GO:0045202,GO:0005886,GO:0005001,GO:0035418,GO:0001764,GO:0097402,GO:0035335,GO:0007369,GO:0007416,GO:0008045,GO:0008544,GO:0000003,GO:0010172,	K05695|1|0.0|4039|cel:CELE_C09D8.1|receptor-type tyrosine-protein phosphatase F [EC:3.1.3.48]!K06777|5|0.0|880|mze:101484991|receptor-type tyrosine-protein phosphatase delta [EC:3.1.3.48]	gi|392891633|ref|NP_001254270.1|	0	Protein-tyrosine-phosphatase [Caenorhabditis elegans]
cel-miR-55b	NM_001306766.1	-30.3	0.540215	-29.11	172	hecd-1	GO:0046872,GO:0016874,GO:0004842,GO:0031581,GO:0040027,GO:0016567,GO:0030163,GO:0009792,GO:0016246,	K12231|1|0.0|5401|cel:CELE_C34D4.14|E3 ubiquitin-protein ligase HECTD1 [EC:2.3.2.26]	gi|808356334|ref|NP_001293695.1|	0	HECtD1 ubiquitin ligase homolog [Caenorhabditis elegans]
cel-miR-55b	NM_070663.6	-30.7	0.119943	-28.44	171	atgp-1	GO:0016021,GO:0003824,GO:0005975,	K14210|1|0.0|1268|cel:CELE_F26D10.9|solute carrier family 3 (neutral and basic amino acid transporter), member 1	gi|32565753|ref|NP_503064.2|	0	Amino acid Transporter GlycoProtein subunit [Caenorhabditis elegans]
cel-miR-55b	NM_001306761.1	-30.3	0.539944	-29.11	172	hecd-1	GO:0046872,GO:0016874,GO:0004842,GO:0031581,GO:0040027,GO:0016567,GO:0030163,GO:0009792,GO:0016246,	K12231|1|0.0|5407|cel:CELE_C34D4.14|E3 ubiquitin-protein ligase HECTD1 [EC:2.3.2.26]	gi|808356324|ref|NP_001293690.1|	0	HECtD1 ubiquitin ligase homolog [Caenorhabditis elegans]
cel-miR-55b	NM_068123.4	-29.2	0.094672	-29.02	175	col-33	GO:0016021,GO:0005581,GO:0042302,	K06237|1|1.78e-14|79.3|phu:Phum_PHUM136030|collagen, type IV, alpha	gi|71987869|ref|NP_500524.2|	0	COLlagen [Caenorhabditis elegans]
cel-miR-55b	NM_062088.3	-28.5	0.02997	-27.57	175	C17F4.2	-	-	gi|17531919|ref|NP_494489.1|	4.10904e-80	Uncharacterized protein CELE_C17F4.2 [Caenorhabditis elegans]
cel-miR-55b	NM_001306763.1	-30.3	0.545196	-29.11	172	hecd-1	GO:0046872,GO:0016874,GO:0004842,GO:0031581,GO:0040027,GO:0016567,GO:0030163,GO:0009792,GO:0016246,	K12231|1|0.0|5381|cel:CELE_C34D4.14|E3 ubiquitin-protein ligase HECTD1 [EC:2.3.2.26]	gi|808356328|ref|NP_001293692.1|	0	HECtD1 ubiquitin ligase homolog [Caenorhabditis elegans]
cel-miR-55b	NM_001026835.3	-28.7	0.460116	-25.26	162	shn-1	GO:0005515,GO:0030421,GO:0007622,	K15009|1|0.0|2301|cel:CELE_C33B4.3|SH3 and multiple ankyrin repeat domains protein	gi|71983513|ref|NP_001022006.1|	0	SHaNk (SH3/ankyrin domain scaffold protein) related [Caenorhabditis elegans]
cel-miR-55b	NR_001264.2	-45.6	0	-44.31	200	mir-55	-	-	-	-	-
cel-miR-55b	NM_071588.1	-25.6	0.398208	-26.5	159	srbc-67	GO:0016021,	-	gi|17564650|ref|NP_503989.1|	0	Serpentine Receptor, class BC (class B-like) [Caenorhabditis elegans]
cel-miR-55b	NM_001306539.1	-28.3	0.628557	-26.64	158	ptp-3	GO:0016021,GO:0005912,GO:0045202,GO:0005886,GO:0005001,GO:0035418,GO:0001764,GO:0097402,GO:0035335,GO:0007369,GO:0007416,GO:0008045,GO:0008544,GO:0000003,GO:0010172,	K05695|1|0.0|3000|cel:CELE_C09D8.1|receptor-type tyrosine-protein phosphatase F [EC:3.1.3.48]	gi|808355292|ref|NP_001293468.1|	0	Protein-tyrosine-phosphatase [Caenorhabditis elegans]
cel-miR-55b	NM_001322533.1	-25.6	0.357701	-26.5	159	srbc-67	GO:0016021,	-	gi|17564650|ref|NP_503989.1|	1.78014e-149	Serpentine Receptor, class BC (class B-like) [Caenorhabditis elegans]
cel-miR-55b	NM_001026771.2	-28.3	0.763679	-26.64	158	ptp-3	GO:0016021,GO:0005912,GO:0045202,GO:0005886,GO:0005001,GO:0035418,GO:0001764,GO:0097402,GO:0035335,GO:0007369,GO:0007416,GO:0008045,GO:0008544,GO:0000003,GO:0010172,	K05695|1|0.0|4528|cel:CELE_C09D8.1|receptor-type tyrosine-protein phosphatase F [EC:3.1.3.48]!K06777|4|0.0|907|mze:101484991|receptor-type tyrosine-protein phosphatase delta [EC:3.1.3.48]	gi|71981550|ref|NP_001021942.1|	0	Tyrosine-protein phosphatase Lar-like [Caenorhabditis elegans]
cel-miR-55b	NM_001129110.2	-28.3	0.770562	-26.64	158	ptp-3	GO:0016021,GO:0005912,GO:0045202,GO:0005886,GO:0005001,GO:0035418,GO:0001764,GO:0097402,GO:0035335,GO:0007369,GO:0007416,GO:0008045,GO:0008544,GO:0000003,GO:0010172,	K05695|1|0.0|4638|cel:CELE_C09D8.1|receptor-type tyrosine-protein phosphatase F [EC:3.1.3.48]!K06777|4|0.0|905|mze:101484991|receptor-type tyrosine-protein phosphatase delta [EC:3.1.3.48]	gi|193204071|ref|NP_001122582.1|	0	Protein-tyrosine-phosphatase [Caenorhabditis elegans]
cel-miR-55b	NR_136391.1	-25.6	0.360092	-26.5	159	srbc-67	-	-	-	-	-
cel-miR-55b	NM_001306540.1	-28.3	0.766637	-26.64	158	ptp-3	GO:0016021,GO:0005912,GO:0045202,GO:0005886,GO:0005001,GO:0035418,GO:0001764,GO:0097402,GO:0035335,GO:0007369,GO:0007416,GO:0008045,GO:0008544,GO:0000003,GO:0010172,	K05695|1|0.0|4518|cel:CELE_C09D8.1|receptor-type tyrosine-protein phosphatase F [EC:3.1.3.48]!K06777|4|0.0|897|mze:101484991|receptor-type tyrosine-protein phosphatase delta [EC:3.1.3.48]	gi|808355294|ref|NP_001293469.1|	0	Protein-tyrosine-phosphatase [Caenorhabditis elegans]
cel-miR-55b	NM_001276741.1	-28.3	0.767223	-26.64	158	ptp-3	GO:0016021,GO:0005912,GO:0045202,GO:0005886,GO:0005001,GO:0035418,GO:0001764,GO:0097402,GO:0035335,GO:0007369,GO:0007416,GO:0008045,GO:0008544,GO:0000003,GO:0010172,	K05695|1|0.0|4517|cel:CELE_C09D8.1|receptor-type tyrosine-protein phosphatase F [EC:3.1.3.48]!K06777|4|0.0|902|mze:101484991|receptor-type tyrosine-protein phosphatase delta [EC:3.1.3.48]	gi|453231834|ref|NP_001263670.1|	0	Protein-tyrosine-phosphatase [Caenorhabditis elegans]
cel-miR-55b	NM_001306764.1	-30.3	0.54573	-29.11	172	hecd-1	GO:0046872,GO:0016874,GO:0004842,GO:0031581,GO:0040027,GO:0016567,GO:0030163,GO:0009792,GO:0016246,	K12231|1|0.0|5375|cel:CELE_C34D4.14|E3 ubiquitin-protein ligase HECTD1 [EC:2.3.2.26]	gi|808356330|ref|NP_001293693.1|	0	HECtD1 ubiquitin ligase homolog [Caenorhabditis elegans]
cel-miR-55b	NM_001306759.1	-30.3	0.545463	-29.11	172	hecd-1	GO:0046872,GO:0016874,GO:0004842,GO:0031581,GO:0040027,GO:0016567,GO:0030163,GO:0009792,GO:0016246,	K12231|1|0.0|5380|cel:CELE_C34D4.14|E3 ubiquitin-protein ligase HECTD1 [EC:2.3.2.26]	gi|808356320|ref|NP_001293688.1|	0	HECtD1 ubiquitin ligase homolog [Caenorhabditis elegans]
cel-miR-55b	NM_001306760.1	-30.3	0.540486	-29.11	172	hecd-1	GO:0046872,GO:0016874,GO:0004842,GO:0031581,GO:0040027,GO:0016567,GO:0030163,GO:0009792,GO:0016246,	K12231|1|0.0|5400|cel:CELE_C34D4.14|E3 ubiquitin-protein ligase HECTD1 [EC:2.3.2.26]	gi|808356322|ref|NP_001293689.1|	0	HECtD1 ubiquitin ligase homolog [Caenorhabditis elegans]
cel-miR-55b	NM_001276745.1	-28.3	0.508936	-26.64	158	ptp-3	GO:0016021,GO:0005912,GO:0045202,GO:0005886,GO:0005001,GO:0035418,GO:0001764,GO:0097402,GO:0035335,GO:0007369,GO:0007416,GO:0008045,GO:0008544,GO:0000003,GO:0010172,	K05695|1|0.0|2294|cel:CELE_C09D8.1|receptor-type tyrosine-protein phosphatase F [EC:3.1.3.48]	gi|71981550|ref|NP_001021942.1|	0	Tyrosine-protein phosphatase Lar-like [Caenorhabditis elegans]
cel-miR-55b	NM_001047262.3	-29	0.246559	-25.31	158	C01F1.3	GO:0008460,GO:0002119,GO:0018991,GO:0009225,GO:0040011,	K12450|1|0.0|1318|cel:CELE_C01F1.3|UDP-glucose 4,6-dehydratase [EC:4.2.1.76]!K01710|4|3.40e-85|274|cbr:CBG14085|dTDP-glucose 4,6-dehydratase [EC:4.2.1.46]	gi|115532424|ref|NP_001040727.1|	0	Uncharacterized protein CELE_C01F1.3 [Caenorhabditis elegans]
cel-miR-55b	NM_001276742.1	-28.3	0.773562	-26.64	158	ptp-3	GO:0016021,GO:0005912,GO:0045202,GO:0005886,GO:0005001,GO:0035418,GO:0001764,GO:0097402,GO:0035335,GO:0007369,GO:0007416,GO:0008045,GO:0008544,GO:0000003,GO:0010172,	K05695|1|0.0|4474|cel:CELE_C09D8.1|receptor-type tyrosine-protein phosphatase F [EC:3.1.3.48]!K06777|4|0.0|902|mze:101484991|receptor-type tyrosine-protein phosphatase delta [EC:3.1.3.48]	gi|453231836|ref|NP_001263671.1|	0	Protein-tyrosine-phosphatase [Caenorhabditis elegans]
cel-miR-55b	NM_065798.5	-25.6	0.551299	-26.42	172	F56D2.3	-	-	gi|17553682|ref|NP_498199.1|	0	Uncharacterized protein CELE_F56D2.3 [Caenorhabditis elegans]
cel-miR-55b	NM_001129696.2	-28	0.548452	-25.2	157	odr-1	GO:0016021,GO:0005622,GO:0004383,GO:0004672,GO:0005524,GO:0006468,GO:0035556,GO:0006182,	K01769|1|1.29e-114|385|cel:CELE_T26C12.4|guanylate cyclase, other [EC:4.6.1.2]!K12323|3|1.82e-103|352|sko:100374109|atrial natriuretic peptide receptor A [EC:4.6.1.2]	gi|392927781|ref|NP_001123168.2|	0	Receptor-type guanylate cyclase gcy-10 [Caenorhabditis elegans]
cel-miR-55b	NR_068865.1	-27.9	0.032558	-26.82	160	F31F7.8	-	-	-	-	-
cel-miR-55b	NM_001306762.1	-30.3	0.544928	-29.11	172	hecd-1	GO:0046872,GO:0016874,GO:0004842,GO:0031581,GO:0040027,GO:0016567,GO:0030163,GO:0009792,GO:0016246,	K12231|1|0.0|5385|cel:CELE_C34D4.14|E3 ubiquitin-protein ligase HECTD1 [EC:2.3.2.26]	gi|808356326|ref|NP_001293691.1|	0	HECtD1 ubiquitin ligase homolog [Caenorhabditis elegans]
cel-miR-55b	NM_066041.5	-28.9	0.260018	-25.72	174	C09E7.4	GO:0005634,GO:0000977,GO:0046983,GO:0003700,GO:0006357,	-	gi|17552132|ref|NP_498442.1|	0	Uncharacterized protein CELE_C09E7.4 [Caenorhabditis elegans]
cel-miR-55b	NR_136392.1	-25.6	0.425204	-26.5	159	srbc-67	-	-	-	-	-
cel-miR-55b	NM_182246.3	-29.4	0.142421	-30.14	162	ZK131.11	GO:0006952,	-	gi|32565641|ref|NP_872046.1|	0	Uncharacterized protein CELE_ZK131.11 [Caenorhabditis elegans]
cel-miR-55b	NM_001026397.2	-32.1	0.029986	-25.32	166	K11D2.5	GO:0005739,GO:0003690,GO:0006355,	K11D2.5;|1|0.0|716|cel:CELE_K11D2.5|Uncharacterized protein!K15032|1|0.0|716|cel:CELE_K11D2.5|mTERF domain-containing protein, mitochondrial	gi|392887403|ref|NP_001021568.2|	0	Uncharacterized protein CELE_K11D2.5 [Caenorhabditis elegans]
cel-miR-55b	NM_001026773.3	-28.3	0.552665	-26.64	158	ptp-3	GO:0016021,GO:0005912,GO:0045202,GO:0005886,GO:0005001,GO:0035418,GO:0001764,GO:0097402,GO:0035335,GO:0007369,GO:0007416,GO:0008045,GO:0008544,GO:0000003,GO:0010172,	K05695|1|0.0|2390|cel:CELE_C09D8.1|receptor-type tyrosine-protein phosphatase F [EC:3.1.3.48]	gi|71981566|ref|NP_001021944.1|	0	Protein-tyrosine-phosphatase [Caenorhabditis elegans]
cel-miR-55b	NM_074382.1	-31.4	0.048102	-29.65	170	srw-17	GO:0016021,GO:0008528,GO:0007186,	-	gi|17564234|ref|NP_506783.1|	0	Serpentine Receptor, class W [Caenorhabditis elegans]
cel-miR-55b	NM_061792.1	-26.1	0.332629	-25.72	157	hpo-7	GO:0004725,GO:0035335,	K18026|1|1.67e-12|72.0|tru:101063867|tyrosine-protein phosphatase non-receptor type 2 [EC:3.1.3.48]!K05696|5|4.83e-11|67.8|myd:102764615|tyrosine-protein phosphatase non-receptor type 1 [EC:3.1.3.48]	gi|17532345|ref|NP_494193.1|	0	Uncharacterized protein CELE_C40A11.5 [Caenorhabditis elegans]
cel-miR-55b	NM_067699.3	-35.8	0.008132	-34.52	176	hpo-6	GO:0045121,	-	gi|17543306|ref|NP_500100.1|	0	Uncharacterized protein CELE_Y41D4B.16 [Caenorhabditis elegans]
cel-miR-55b	NR_131444.1	-27.5	0.023686	-25.11	157	F42H10.9	-	-	-	-	-
cel-miR-55b	NM_077042.5	-28.7	0.472003	-25.53	167	H03E18.1	GO:0022404,GO:0042335,GO:0002064,	-	gi|71992424|ref|NP_509443.2|	0	Uncharacterized protein CELE_H03E18.1 [Caenorhabditis elegans]
cel-miR-55b	NM_001267368.1	-28.7	0.469777	-25.26	162	shn-1	GO:0005515,GO:0030421,GO:0007622,	K15009|1|0.0|2288|cel:CELE_C33B4.3|SH3 and multiple ankyrin repeat domains protein	gi|392891765|ref|NP_001254297.1|	0	SHaNk (SH3/ankyrin domain scaffold protein) related [Caenorhabditis elegans]
cel-miR-55b	NM_001306765.1	-30.3	0.540756	-29.11	172	hecd-1	GO:0046872,GO:0016874,GO:0004842,GO:0031581,GO:0040027,GO:0016567,GO:0030163,GO:0009792,GO:0016246,	K12231|1|0.0|5395|cel:CELE_C34D4.14|E3 ubiquitin-protein ligase HECTD1 [EC:2.3.2.26]	gi|808356332|ref|NP_001293694.1|	0	HECtD1 ubiquitin ligase homolog [Caenorhabditis elegans]
cel-miR-55b	NM_077865.3	-28	0.528975	-25.2	157	odr-1	GO:0016021,GO:0005622,GO:0004383,GO:0004672,GO:0005524,GO:0006468,GO:0035556,GO:0006182,	K01769|1|8.71e-112|375|cel:CELE_T26C12.4|guanylate cyclase, other [EC:4.6.1.2]!K12323|3|7.75e-103|349|sko:100374109|atrial natriuretic peptide receptor A [EC:4.6.1.2]	gi|71994363|ref|NP_510266.3|	0	Receptor-type guanylate cyclase gcy-10 [Caenorhabditis elegans]
cel-miR-55b	NM_001276743.1	-28.3	0.770129	-26.64	158	ptp-3	GO:0016021,GO:0005912,GO:0045202,GO:0005886,GO:0005001,GO:0035418,GO:0001764,GO:0097402,GO:0035335,GO:0007369,GO:0007416,GO:0008045,GO:0008544,GO:0000003,GO:0010172,	K05695|1|0.0|4485|cel:CELE_C09D8.1|receptor-type tyrosine-protein phosphatase F [EC:3.1.3.48]!K06777|4|0.0|907|mze:101484991|receptor-type tyrosine-protein phosphatase delta [EC:3.1.3.48]	gi|453231838|ref|NP_001263672.1|	0	Protein-tyrosine-phosphatase [Caenorhabditis elegans]
cel-miR-55b	NM_075686.5	-27.6	0.609963	-25.6	160	M02E1.1	-	-	gi|943463240|ref|NP_508087.3|	0	Uncharacterized protein CELE_M02E1.1 [Caenorhabditis elegans]
cel-miR-55b	NM_001026772.3	-28.3	0.623487	-26.64	158	ptp-3	GO:0016021,GO:0005912,GO:0045202,GO:0005886,GO:0005001,GO:0035418,GO:0001764,GO:0097402,GO:0035335,GO:0007369,GO:0007416,GO:0008045,GO:0008544,GO:0000003,GO:0010172,	K05695|1|0.0|3011|cel:CELE_C09D8.1|receptor-type tyrosine-protein phosphatase F [EC:3.1.3.48]	gi|71981556|ref|NP_001021943.1|	0	Tyrosine-protein phosphatase Lar-like [Caenorhabditis elegans]
novel_mir7	NM_001025951.1	-30.5	0.202076	-27.6	160	swp-1	GO:0003723,GO:0000395,GO:0006355,	-	gi|71980808|ref|NP_001021122.1|	0	splicing factor (Suppressor of White aPricot) related [Caenorhabditis elegans]
novel_mir7	NM_001307537.1	-34.5	0.266467	-50.01	311	eel-1	GO:0005737,GO:0005634,GO:0016874,GO:0004842,GO:0005515,GO:0045167,GO:0010468,GO:0031581,GO:0030178,GO:0042770,GO:0043065,GO:0042787,GO:0002119,GO:0009792,	K10592|1|0.0|8635|cel:CELE_Y67D8C.5|E3 ubiquitin-protein ligase HUWE1 [EC:2.3.2.26]	gi|808357880|ref|NP_001294466.1|	0	Enhancer of EfL-1 mutant phenotype [Caenorhabditis elegans]
novel_mir7	NM_059925.4	-32.2	0.075141	-32.14	158	R05D11.4	GO:0004004,GO:0003676,GO:0005524,GO:0010501,GO:0006364,	K14779|1|0.0|1192|cel:CELE_R05D11.4|ATP-dependent RNA helicase DDX52/ROK1 [EC:3.6.4.13]	gi|17508543|ref|NP_492326.1|	0	Uncharacterized protein CELE_R05D11.4 [Caenorhabditis elegans]
novel_mir7	NM_077209.4	-26.1	0.676041	-27.36	159	F49E2.5	GO:0002119,	-	gi|17567935|ref|NP_509610.1|	0	Uncharacterized protein CELE_F49E2.5 [Caenorhabditis elegans]
novel_mir7	NM_063674.4	-28.9	0.338776	-56.44	320	fzr-1	GO:0005737,GO:0005634,GO:0097027,GO:0010997,GO:0007276,GO:0018991,GO:1904668,GO:0009792,	K03364|1|0.0|1457|cel:CELE_ZK1307.6|cell division cycle 20-like protein 1, cofactor of APC complex	gi|17538129|ref|NP_496075.1|	0	FiZzy Related family [Caenorhabditis elegans]
novel_mir7	NM_001307260.1	-28.4	0.665978	-45.46	305	Y40C5A.3	-	-	gi|808357322|ref|NP_001294189.1|	0	Uncharacterized protein CELE_Y40C5A.3 [Caenorhabditis elegans]
novel_mir7	NM_064040.6	-36.1	0.004396	-32.76	166	rsp-2	GO:0005634,GO:0003723,GO:0000166,GO:0007506,GO:0000398,GO:0007283,GO:0002119,GO:0030154,GO:0040009,	K12893|1|0.0|557|cel:CELE_W02B12.2|splicing factor, arginine/serine-rich 4/5/6	gi|17535713|ref|NP_496441.1|	0	Probable splicing factor, arginine/serine-rich 2 [Caenorhabditis elegans]
novel_mir7	NM_171321.4	-25.3	0.773746	-66.77	461	ZK180.5	-	K19827|1|6.93e-14|80.9|ggo:101146907|microtuble-actin crosslinking factor 1	gi|32566506|ref|NP_741377.2|	0	Uncharacterized protein CELE_ZK180.5 [Caenorhabditis elegans]
novel_mir7	NM_075773.4	-30	0.076721	-26.8	158	mab-7	GO:0016021,GO:0005886,GO:0007275,	-	gi|193211255|ref|NP_508174.2|	0	Protein male abnormal 7 [Caenorhabditis elegans]
novel_mir7	NM_067623.4	-32.5	0.026777	-27.1	163	atg-3	GO:0000153,GO:0005829,GO:0019776,GO:0000045,GO:0000422,GO:0044804,GO:0006950,GO:0008340,GO:0040007,GO:0015031,	K08343|1|0.0|637|cel:CELE_Y55F3AM.4|ubiquitin-like-conjugating enzyme ATG3	gi|17543646|ref|NP_500024.1|	0	Autophagy-related protein 3 [Caenorhabditis elegans]
novel_mir7	NM_001316808.1	-29.8	0.753726	-72.03	459	ketn-1	GO:0031674,GO:0051015,	K12567|1|0.0|6539|cel:CELE_F54E2.3|titin [EC:2.7.11.1]	gi|943463113|ref|NP_001303737.1|	0	KETtiN (Drosophila actin-binding) homolog [Caenorhabditis elegans]
novel_mir7	NM_065266.3	-28.2	0.602824	-79.1	460	R148.3	GO:0016021,	-	gi|17554688|ref|NP_497667.1|	0	Uncharacterized protein CELE_R148.3 [Caenorhabditis elegans]
novel_mir7	NM_067556.1	-25.1	0.743514	-41.96	287	col-102	GO:0016021,GO:0005581,GO:0042302,	K06236|1|1.66e-12|75.5|phi:102104738|collagen, type I, alpha	gi|17538706|ref|NP_499957.1|	0	COLlagen [Caenorhabditis elegans]
novel_mir7	NM_075976.4	-28.6	0.292882	-25.55	151	igcm-4	GO:0016021,	K05093|1|1.45e-26|119|cjo:107316195|fibroblast growth factor receptor 2 [EC:2.7.10.1]	gi|17570553|ref|NP_508377.1|	0	ImmunoGlobulin-like Cell adhesion Molecule family [Caenorhabditis elegans]
novel_mir7	NM_078247.7	-32.1	0.078367	-29.94	158	mua-6	GO:0005737,GO:0030056,GO:0005882,GO:0005198,GO:0009792,GO:0010171,GO:0002119,GO:0018991,GO:0018996,GO:0030163,GO:0040011,GO:0006898,	K18585|1|0.0|1184|cel:CELE_W10G6.3|intermediate filament protein if	gi|17568557|ref|NP_510648.1|	0	Intermediate filament protein ifa-2 [Caenorhabditis elegans]
novel_mir7	NM_001270015.1	-30.5	0.549072	-97.89	501	mlt-11	GO:0004867,GO:0009792,GO:0002119,GO:0010951,GO:0018996,GO:0040011,	K03909|1|1.20e-30|127|acs:103280186|tissue factor pathway inhibitor	gi|392923281|ref|NP_001256944.1|	0	Uncharacterized protein CELE_W01F3.3 [Caenorhabditis elegans]
novel_mir7	NM_001029523.3	-29	0.456451	-27.36	159	F49E2.5	GO:0002119,	-	gi|71991088|ref|NP_001024694.1|	0	Uncharacterized protein CELE_F49E2.5 [Caenorhabditis elegans]
novel_mir7	NM_001027461.3	-30.1	0.279201	-28	151	gip-1	GO:0005815,GO:0016021,GO:0000922,GO:0043015,GO:0009792,GO:0007020,	K16569|1|0.0|1850|cel:CELE_H04J21.3|gamma-tubulin complex component 2!K16570|3|4.23e-10|69.3|bmy:Bm1_25025|gamma-tubulin complex component 3	gi|71987451|ref|NP_001022632.1|	0	Gamma-tubulin Interacting Protein [Caenorhabditis elegans]
novel_mir7	NM_001322739.1	-27.3	0.584929	-26.73	150	brf-1	GO:0000126,GO:0017025,GO:0008270,GO:0006384,GO:0006355,	K15196|1|0.0|1528|cel:CELE_F45E12.2|transcription factor IIIB 90 kDa subunit	gi|17531397|ref|NP_495526.1|	0	BRF (transcription factor) homolog [Caenorhabditis elegans]
novel_mir7	NM_001276806.1	-27.9	0.655315	-50.57	316	pod-1	GO:0051285,GO:0032154,GO:0051015,GO:0009792,GO:0008340,GO:0006915,GO:0048477,	K18619|1|0.0|2118|cel:CELE_Y76A2B.1|coronin-7	gi|453232064|ref|NP_001263735.1|	0	Uncharacterized protein CELE_Y76A2B.1 [Caenorhabditis elegans]
novel_mir7	NR_131382.1	-28.2	0.780732	-29.11	151	let-526	-	-	-	-	-
novel_mir7	NM_001313552.1	-31.9	0.31605	-60.22	317	sea-2	GO:0005737,GO:0005634,GO:0003725,GO:0003727,GO:0009792,GO:0040034,GO:0007549,GO:0010629,GO:0008340,GO:0009408,	-	gi|922582098|ref|NP_001300481.1|	0	Signal Element on Autosome [Caenorhabditis elegans]
novel_mir7	NM_065667.3	-27.9	0.531341	-26.67	161	pcf-11	GO:0016021,GO:0005849,GO:0005737,GO:0003729,GO:0000993,GO:0006379,GO:0006369,GO:0006915,GO:0006378,GO:0000003,GO:0002119,GO:0009792,	K14400|1|0.0|1693|cel:CELE_R144.2|pre-mRNA cleavage complex 2 protein Pcf11	gi|17554666|ref|NP_498068.1|	0	Polyadenylation and cleavage factor homolog 11 [Caenorhabditis elegans]
novel_mir7	NM_001269164.1	-32.8	0.024733	-25.28	150	C37C3.1	GO:0019239,GO:0009451,	-	gi|392919587|ref|NP_001256092.1|	0	Uncharacterized protein CELE_C37C3.1 [Caenorhabditis elegans]
novel_mir7	NM_170906.5	-33.3	0.054741	-29.12	157	cle-1	GO:0030054,GO:0005581,GO:0005604,GO:0005198,GO:0035418,GO:0007411,GO:0001764,GO:0040035,GO:0007271,GO:0007155,GO:0050808,GO:0040039,	K08135|1|3.20e-57|209|tsp:Tsp_05509|collagen, type XV, alpha!K06823|2|9.03e-49|189|mze:101464083|collagen, type XVIII, alpha	gi|25145765|ref|NP_740898.1|	0	CoLlagen with Endostatin domain [Caenorhabditis elegans]
novel_mir7	NM_001313096.1	-29	0.5883	-46.31	297	egl-8	GO:0005622,GO:0030424,GO:0005912,GO:0005886,GO:0045202,GO:0043204,GO:0004871,GO:0004435,GO:0005509,GO:0008340,GO:0043052,GO:0016246,GO:0016042,GO:0007320,GO:0034609,GO:0040017,GO:0035418,GO:0043051,GO:0007212,GO:0046662,GO:0009792,GO:0014057,GO:0006935,GO:0030163,GO:0035556,	K05858|1|0.0|3034|cel:CELE_B0348.4|phosphatidylinositol phospholipase C, beta [EC:3.1.4.11]	gi|922580910|ref|NP_001300025.1|	0	Phosphoinositide phospholipase C [Caenorhabditis elegans]
novel_mir7	NM_001306547.1	-28.2	0.70961	-60.22	317	sea-2	GO:0005737,GO:0005634,GO:0003725,GO:0003727,GO:0009792,GO:0040034,GO:0007549,GO:0010629,GO:0008340,GO:0009408,	-	gi|922582096|ref|NP_001300480.1|	0	Signal Element on Autosome [Caenorhabditis elegans]
novel_mir7	NM_001028923.3	-29.3	0.126994	-51.02	322	grl-7	-	-	gi|72000275|ref|NP_001024094.1|	0	GRound-Like (grd related) [Caenorhabditis elegans]
novel_mir7	NM_070402.5	-26.3	0.790879	-26.98	164	eps-8	GO:0030056,GO:0005903,GO:0045177,GO:0051015,GO:0000003,GO:0040027,GO:0006898,GO:0051017,GO:0040026,GO:0048730,GO:0040011,GO:0045185,GO:0009792,GO:0045109,GO:0048546,GO:0030421,GO:0048598,GO:0051016,	K17277|1|0.0|1772|cel:CELE_Y57G11C.24|epidermal growth factor receptor kinase substrate 8	gi|115534495|ref|NP_502803.3|	0	EPS (human endocytosis) related [Caenorhabditis elegans]
novel_mir7	NM_073988.5	-29.4	0.39703	-25.02	170	T01D3.3	GO:0005576,GO:0030414,GO:0046872,GO:0010466,GO:0006801,GO:0055114,	K04565|1|3.46e-14|74.3|loa:LOAG_11116|superoxide dismutase, Cu-Zn family [EC:1.15.1.1]	gi|193208545|ref|NP_506389.2|	0	Uncharacterized protein CELE_T01D3.3 [Caenorhabditis elegans]
novel_mir7	NM_001268195.1	-26.6	0.705619	-25.94	150	T28D6.5	GO:0016021,GO:0009792,GO:0040007,GO:0040035,GO:0002119,	-	gi|392896721|ref|NP_001255125.1|	0	Uncharacterized protein CELE_T28D6.5 [Caenorhabditis elegans]
novel_mir7	NM_058907.3	-34.7	0.000662	-31.76	161	R12E2.15	-	-	gi|17508639|ref|NP_491308.1|	2.96151e-40	Uncharacterized protein CELE_R12E2.15 [Caenorhabditis elegans]
novel_mir7	NM_001270275.1	-28.7	0.141415	-26.97	150	pqn-18	-	-	gi|392927656|ref|NP_001257203.1|	0	Prion-like-(Q/N-rich)-domain-bearing protein [Caenorhabditis elegans]
novel_mir7	NM_064446.1	-26	0.629195	-25.62	146	ddl-2	GO:0071203,GO:0005769,GO:0043014,GO:0008340,GO:0042994,GO:0034314,GO:2000677,	K18461|1|0.0|991|cel:CELE_Y48E1B.1|WAS protein family homolog 1	gi|17537245|ref|NP_496847.1|	0	Daf-16-Dependent Longevity (WT but not daf-16 lifespan increased) [Caenorhabditis elegans]
novel_mir7	NM_066664.4	-26.5	0.5449	-43.02	312	slc-17.2	GO:0016021,GO:0015293,GO:0009792,GO:0006814,GO:0006820,GO:0055085,	K08193|1|0.0|997|cel:CELE_C38C10.2|MFS transporter, ACS family, solute carrier family 17 (sodium-dependent inorganic phosphate cotransporter), other!K12301|4|9.10e-131|394|sko:100378615|MFS transporter, ACS family, solute carrier family 17 (sodium-dependent inorganic phosphate cotransporter), member 5	gi|17552542|ref|NP_499065.1|	0	Uncharacterized transporter slc-17.2 [Caenorhabditis elegans]
novel_mir7	NM_001313103.1	-29	0.547162	-46.31	297	egl-8	GO:0005622,GO:0030424,GO:0005912,GO:0005886,GO:0045202,GO:0043204,GO:0004871,GO:0004435,GO:0005509,GO:0008340,GO:0043052,GO:0016246,GO:0016042,GO:0007320,GO:0034609,GO:0040017,GO:0035418,GO:0043051,GO:0007212,GO:0046662,GO:0009792,GO:0014057,GO:0006935,GO:0030163,GO:0035556,	K05858|1|0.0|1671|cel:CELE_B0348.4|phosphatidylinositol phospholipase C, beta [EC:3.1.4.11]	gi|922580924|ref|NP_001300032.1|	0	Phosphoinositide phospholipase C [Caenorhabditis elegans]
novel_mir7	NM_001263358.1	-29.3	0.15395	-26.09	162	T23B3.1	-	-	gi|392885982|ref|NP_001250287.1|	0	Uncharacterized protein CELE_T23B3.1 [Caenorhabditis elegans]
novel_mir7	NM_181959.4	-28.1	0.384821	-55.54	319	F23H11.4	GO:0005515,GO:0009792,GO:0007165,	K12490|1|4.79e-07|58.5|bmy:Bm1_45680|Arf-GAP with Rho-GAP domain, ANK repeat and PH domain-containing protein 3	gi|32565375|ref|NP_871688.1|	0	Uncharacterized protein CELE_F23H11.4 [Caenorhabditis elegans]
novel_mir7	NM_001322752.1	-29.7	0.224011	-50.69	320	die-1	GO:0046872,	-	gi|17532737|ref|NP_496175.1|	0	Dorsal Intercalation and Elongation defect [Caenorhabditis elegans]
novel_mir7	NM_001307256.1	-28.4	0.675094	-45.46	305	Y40C5A.3	-	-	gi|808357314|ref|NP_001294185.1|	0	Uncharacterized protein CELE_Y40C5A.3 [Caenorhabditis elegans]
novel_mir7	NM_001313097.1	-29	0.570394	-46.31	297	egl-8	GO:0005622,GO:0030424,GO:0005912,GO:0005886,GO:0045202,GO:0043204,GO:0004871,GO:0004435,GO:0005509,GO:0008340,GO:0043052,GO:0016246,GO:0016042,GO:0007320,GO:0034609,GO:0040017,GO:0035418,GO:0043051,GO:0007212,GO:0046662,GO:0009792,GO:0014057,GO:0006935,GO:0030163,GO:0035556,	K05858|1|0.0|2569|cbr:CBG06373|phosphatidylinositol phospholipase C, beta [EC:3.1.4.11]	gi|922580912|ref|NP_001300026.1|	0	Phosphoinositide phospholipase C [Caenorhabditis elegans]
novel_mir7	NM_067410.3	-28.8	0.207846	-25.27	151	hip-1	GO:0005856,GO:0098793,GO:0055120,GO:0005783,GO:0030017,GO:0005543,GO:0030276,GO:0003779,GO:0030421,GO:0007269,GO:0006897,GO:0007624,GO:0032502,GO:0008104,	K09560|1|0.0|847|cel:CELE_T12D8.8|suppressor of tumorigenicity protein 13	gi|17555058|ref|NP_499811.1|	0	Hsp-70 Interacting Protein homolog [Caenorhabditis elegans]
novel_mir7	NM_001267516.1	-34	0.186939	-72.41	444	unc-52	GO:0005604,GO:0005509,GO:0005198,GO:0016477,GO:0008340,GO:0071688,GO:0016358,GO:0031581,GO:0000003,GO:0018996,GO:0048644,GO:0061199,GO:0008543,GO:0002119,GO:0040017,GO:0006898,GO:0030163,GO:0009792,	K06255|1|0.0|654|cjc:100413695|heparan sulfate proteoglycan 2 (perlecan)	gi|392892563|ref|NP_001254445.1|	0	Uncharacterized protein CELE_ZC101.2 [Caenorhabditis elegans]
novel_mir7	NM_001267512.1	-34	0.192115	-72.41	444	unc-52	GO:0005604,GO:0005509,GO:0005198,GO:0016477,GO:0008340,GO:0071688,GO:0016358,GO:0031581,GO:0000003,GO:0018996,GO:0048644,GO:0061199,GO:0008543,GO:0002119,GO:0040017,GO:0006898,GO:0030163,GO:0009792,	K06255|1|1.31e-167|585|cjc:100413695|heparan sulfate proteoglycan 2 (perlecan)	gi|392892554|ref|NP_001254441.1|	0	Uncharacterized protein CELE_ZC101.2 [Caenorhabditis elegans]
novel_mir7	NM_062231.7	-31.1	0.021194	-27.41	167	C46E10.8	-	K19871|1|1.35e-07|55.5|myb:102255323|sal-like protein	gi|17532433|ref|NP_494632.1|	4.79134e-123	Uncharacterized protein CELE_C46E10.8 [Caenorhabditis elegans]
novel_mir7	NM_001047459.1	-28.6	0.166981	-27.44	155	col-14	GO:0016021,GO:0005576,GO:0005581,GO:0042302,GO:0040035,GO:0040002,	K19720|1|1.42e-12|73.9|amj:102573460|collagen, type III, alpha	gi|115532806|ref|NP_001040923.1|	0	Cuticle collagen 14 [Caenorhabditis elegans]
novel_mir7	NM_171165.3	-34.7	0.032821	-26.19	156	smrc-1	GO:0005634,GO:0036310,GO:0005524,GO:0004386,GO:0008094,GO:0006357,GO:0000003,GO:0000733,	K14440|1|0.0|1429|cel:CELE_C16A3.1|SWI/SNF-related matrix-associated actin-dependent regulator of chromatin subfamily A-like protein 1 [EC:3.6.4.12]	gi|25148960|ref|NP_741192.1|	0	Putative SMARCAL1-like protein [Caenorhabditis elegans]
novel_mir7	NM_001047170.2	-33.9	0.001337	-27.88	161	B0261.6	GO:0008340,GO:0006412,GO:0009408,	-	gi|115532240|ref|NP_001040634.1|	5.61637e-56	Uncharacterized protein CELE_B0261.6 [Caenorhabditis elegans]
novel_mir7	NM_069735.5	-26.2	0.794487	-49.69	308	sart-3	GO:0071001,GO:0005654,GO:0030621,GO:0000166,GO:0006396,GO:0008340,GO:0018991,GO:0002119,GO:0040011,GO:0006898,GO:0009792,	K11294|1|1.48e-14|82.4|fch:102052672|nucleolin	gi|17538232|ref|NP_502136.1|	0	human SART-3/p110 homolog [Caenorhabditis elegans]
novel_mir7	NM_001313091.1	-29	0.554911	-46.31	297	egl-8	GO:0005622,GO:0030424,GO:0005912,GO:0005886,GO:0045202,GO:0043204,GO:0004871,GO:0004435,GO:0005509,GO:0008340,GO:0043052,GO:0016246,GO:0016042,GO:0007320,GO:0034609,GO:0040017,GO:0035418,GO:0043051,GO:0007212,GO:0046662,GO:0009792,GO:0014057,GO:0006935,GO:0030163,GO:0035556,	K05858|1|0.0|1669|cel:CELE_B0348.4|phosphatidylinositol phospholipase C, beta [EC:3.1.4.11]	gi|922580900|ref|NP_001300020.1|	0	Phosphoinositide phospholipase C [Caenorhabditis elegans]
novel_mir7	NM_059957.3	-33.3	0.113413	-29.12	157	cle-1	GO:0030054,GO:0005581,GO:0005604,GO:0005198,GO:0035418,GO:0007411,GO:0001764,GO:0040035,GO:0007271,GO:0007155,GO:0050808,GO:0040039,	K08135|1|3.57e-55|209|tsp:Tsp_05509|collagen, type XV, alpha!K06823|4|7.24e-46|186|mze:101464083|collagen, type XVIII, alpha	gi|71981419|ref|NP_492358.3|	0	CoLlagen with Endostatin domain [Caenorhabditis elegans]
novel_mir7	NM_001306455.1	-30.6	0.368667	-25.79	159	itx-1	GO:0016021,GO:0005912,GO:0016323,	K07380|1|3.55e-22|109|acs:100562824|contactin associated protein-like 2	gi|808354473|ref|NP_001249245.2|	0	InTestinal NeureXin-like [Caenorhabditis elegans]
novel_mir7	NM_001029524.3	-29	0.480294	-27.36	159	F49E2.5	GO:0002119,	-	gi|71991094|ref|NP_001024695.1|	0	Uncharacterized protein CELE_F49E2.5 [Caenorhabditis elegans]
novel_mir7	NM_059161.4	-28.2	0.753123	-29.11	151	let-526	GO:0031932,GO:0090544,GO:0005737,GO:0031931,GO:0016303,GO:0004674,GO:0003677,GO:0005524,GO:0044877,GO:0008340,GO:0036092,GO:0018991,GO:0000492,GO:0040027,GO:0040007,GO:0006898,GO:0010629,GO:0043053,GO:0040011,GO:0006915,GO:0045727,GO:0009792,GO:0006468,GO:0006338,GO:0009408,GO:0007413,GO:0010171,GO:1903935,GO:0045944,GO:0031929,GO:0040035,GO:0048382,GO:0046854,GO:0006281,	K11653|1|0.0|3426|cel:CELE_C01G8.9|AT-rich interactive domain-containing protein 1	gi|453224740|ref|NP_001263448.1|	0	Uncharacterized protein CELE_C01G8.9 [Caenorhabditis elegans]
novel_mir7	NM_001330905.1	-28.9	0.689162	-25.02	155	ajm-1	GO:0043296,GO:0016021,GO:0005913,GO:0044292,GO:0016327,GO:0008092,GO:0045216,GO:0040027,GO:0040011,GO:0009792,GO:0008406,	K00476|1|8.89e-21|105|xma:102218642|aspartate beta-hydroxylase [EC:1.14.11.16]	gi|25148106|ref|NP_741868.1|	0	Apical Junction Molecule [Caenorhabditis elegans]
novel_mir7	NM_068464.3	-28.5	0.339302	-27.21	161	C31H1.1	-	-	gi|808356018|ref|NP_500865.3|	0	Uncharacterized protein CELE_C31H1.1 [Caenorhabditis elegans]
novel_mir7	NM_181958.4	-28.2	0.607923	-79.25	462	R148.3	GO:0016021,	-	gi|32565309|ref|NP_871687.1|	0	Uncharacterized protein CELE_R148.3 [Caenorhabditis elegans]
novel_mir7	NM_077370.4	-32.3	0.152414	-51.05	318	bet-2	-	K11722|1|5.40e-51|201|tup:102470944|bromodomain-containing protein 4!K11724|5|6.30e-49|194|dre:333996|bromodomain testis-specific protein	gi|17568247|ref|NP_509771.1|	0	BET (two bromodomains) family protein [Caenorhabditis elegans]
novel_mir7	NM_058736.3	-28.9	0.191534	-27.74	157	pqn-72	GO:0019915,	-	gi|922581929|ref|NP_001300442.1|	0	Prion-like-(Q/N-rich)-domain-bearing protein [Caenorhabditis elegans]
novel_mir7	NM_071818.3	-30.6	0.014649	-28.44	159	Y47D7A.2	-	-	gi|17565828|ref|NP_504219.1|	6.83509e-80	Uncharacterized protein CELE_Y47D7A.2 [Caenorhabditis elegans]
novel_mir7	NM_060641.3	-29.2	0.580838	-57.89	291	Y53C10A.10	-	-	gi|193203538|ref|NP_493042.2|	0	Uncharacterized protein CELE_Y53C10A.10 [Caenorhabditis elegans]
novel_mir7	NM_001313101.1	-29	0.541175	-46.31	297	egl-8	GO:0005622,GO:0030424,GO:0005912,GO:0005886,GO:0045202,GO:0043204,GO:0004871,GO:0004435,GO:0005509,GO:0008340,GO:0043052,GO:0016246,GO:0016042,GO:0007320,GO:0034609,GO:0040017,GO:0035418,GO:0043051,GO:0007212,GO:0046662,GO:0009792,GO:0014057,GO:0006935,GO:0030163,GO:0035556,	K05858|1|0.0|1625|loa:LOAG_00068|phosphatidylinositol phospholipase C, beta [EC:3.1.4.11]	gi|922580920|ref|NP_001300030.1|	0	Phosphoinositide phospholipase C [Caenorhabditis elegans]
novel_mir7	NM_071817.1	-31.4	0.01002	-27.55	156	Y47D7A.7	-	-	gi|17565838|ref|NP_504218.1|	6.57939e-80	Uncharacterized protein CELE_Y47D7A.7 [Caenorhabditis elegans]
novel_mir7	NM_170904.2	-33.3	0.109313	-29.12	157	cle-1	GO:0030054,GO:0005581,GO:0005604,GO:0005198,GO:0035418,GO:0007411,GO:0001764,GO:0040035,GO:0007271,GO:0007155,GO:0050808,GO:0040039,	K08135|1|2.45e-55|209|tsp:Tsp_05509|collagen, type XV, alpha!K06823|2|5.83e-46|186|mze:101464083|collagen, type XVIII, alpha	gi|71981408|ref|NP_740896.2|	0	CoLlagen with Endostatin domain [Caenorhabditis elegans]
novel_mir7	NM_171132.3	-30.5	0.201495	-27.6	160	swp-1	GO:0003723,GO:0000395,GO:0006355,	-	gi|25151783|ref|NP_741149.1|	0	Protein SWAP [Caenorhabditis elegans]
novel_mir7	NM_001026175.3	-29	0.574626	-46.31	297	egl-8	GO:0005622,GO:0030424,GO:0005912,GO:0005886,GO:0045202,GO:0043204,GO:0004871,GO:0004435,GO:0005509,GO:0008340,GO:0043052,GO:0016246,GO:0016042,GO:0007320,GO:0034609,GO:0040017,GO:0035418,GO:0043051,GO:0007212,GO:0046662,GO:0009792,GO:0014057,GO:0006935,GO:0030163,GO:0035556,	K05858|1|0.0|2608|cbr:CBG06373|phosphatidylinositol phospholipase C, beta [EC:3.1.4.11]	gi|71981791|ref|NP_001021346.1|	0	1-phosphatidylinositol 4,5-bisphosphate phosphodiesterase beta egl-8 [Caenorhabditis elegans]
novel_mir7	NM_001270145.2	-29.2	0.780664	-65.87	465	fln-2	GO:0040011,GO:0018996,	K04437|1|0.0|5692|cel:CELE_C23F12.1|filamin	gi|922581563|ref|NP_509580.6|	0	FiLamiN (actin binding protein) homolog [Caenorhabditis elegans]
novel_mir7	NM_001276821.1	-32.7	0.015468	-28.2	168	pes-1	GO:0005634,GO:0000981,GO:0043565,GO:0006357,GO:0002119,GO:0009792,	K09385|1|2.33e-29|115|loa:LOAG_02180|forkhead box protein G	gi|453232118|ref|NP_001263750.1|	1.74906e-168	Patterned Expression Site [Caenorhabditis elegans]
novel_mir7	NM_066606.3	-28	0.724293	-27.83	152	lin-12	GO:0016021,GO:0016324,GO:0005634,GO:0005509,GO:0004888,GO:0005515,GO:0018991,GO:0050954,GO:0007638,GO:0045168,GO:0040027,GO:0040035,GO:0007219,GO:0040026,GO:0040011,GO:0006898,GO:0001708,GO:0009792,GO:0043054,	K20996|1|3.35e-127|437|acs:103278129|Notch 4	gi|17554212|ref|NP_499007.1|	0	Protein lin-12 [Caenorhabditis elegans]
novel_mir7	NM_059495.4	-28.4	0.313951	-26.27	160	ipgm-1	GO:0005737,GO:0030145,GO:0004619,GO:0006007,GO:0008340,GO:0018991,GO:0044262,GO:0010171,GO:0002119,GO:0040011,GO:0009792,GO:0006096,	K15633|1|0.0|1127|cel:CELE_F57B10.3|2,3-bisphosphoglycerate-independent phosphoglycerate mutase [EC:5.4.2.12]	gi|17507741|ref|NP_491896.1|	0	2,3-bisphosphoglycerate-independent phosphoglycerate mutase [Caenorhabditis elegans]
novel_mir7	NM_001270256.1	-30.9	0.057675	-25.51	155	F57G12.2	-	-	gi|392927528|ref|NP_001257185.1|	0	Uncharacterized protein CELE_F57G12.2 [Caenorhabditis elegans]
novel_mir7	NM_001025818.1	-31.6	0.778841	-25.22	154	unc-89	GO:0031430,GO:0004672,GO:0019902,GO:0017048,GO:0005089,GO:0005524,GO:0035023,GO:0040011,GO:0006468,GO:0010171,GO:0030241,GO:0043547,	K12567|1|0.0|1436|adf:107339449|titin [EC:2.7.11.1]	gi|71980602|ref|NP_001020989.1|	0	Muscle M-line assembly protein unc-89 [Caenorhabditis elegans]
novel_mir7	NM_060403.3	-31.7	0.067512	-46.73	313	B0205.10	GO:0008340,	-	gi|17505296|ref|NP_492804.1|	0	Uncharacterized protein CELE_B0205.10 [Caenorhabditis elegans]
novel_mir7	NM_070914.6	-25.5	0.584344	-26.1	158	srp-1	GO:0005615,GO:0005783,GO:0005634,GO:0000166,GO:0004867,GO:0003723,GO:0008233,GO:0010951,GO:0040026,GO:0040011,GO:0008406,GO:0031554,GO:0009792,GO:0030154,GO:0000398,	K13963|1|5.71e-79|251|cel:CELE_F20D6.4|serpin B	gi|17563482|ref|NP_503315.1|	0	SeRPin [Caenorhabditis elegans]
novel_mir7	NM_060963.6	-33.9	0.029506	-29.23	171	slc-25A46	GO:0016021,GO:0006810,	K03454|1|0.0|1034|cel:CELE_Y40B1B.8|solute carrier family 25, member 46	gi|17509959|ref|NP_493364.1|	0	Uncharacterized protein CELE_Y40B1B.8 [Caenorhabditis elegans]
novel_mir7	NM_060429.3	-31.1	0.2751	-25.83	151	C35E7.5	-	-	gi|17505873|ref|NP_492830.1|	0	Uncharacterized protein CELE_C35E7.5 [Caenorhabditis elegans]
novel_mir7	NM_076947.1	-31.2	0.009982	-25.84	155	F45E1.2	-	-	gi|17567715|ref|NP_509348.1|	6.02121e-79	Uncharacterized protein CELE_F45E1.2 [Caenorhabditis elegans]
novel_mir7	NM_001313093.1	-29	0.531874	-46.31	297	egl-8	GO:0005622,GO:0030424,GO:0005912,GO:0005886,GO:0045202,GO:0043204,GO:0004871,GO:0004435,GO:0005509,GO:0008340,GO:0043052,GO:0016246,GO:0016042,GO:0007320,GO:0034609,GO:0040017,GO:0035418,GO:0043051,GO:0007212,GO:0046662,GO:0009792,GO:0014057,GO:0006935,GO:0030163,GO:0035556,	K05858|1|0.0|1447|cel:CELE_B0348.4|phosphatidylinositol phospholipase C, beta [EC:3.1.4.11]	gi|922580904|ref|NP_001300022.1|	0	Phosphoinositide phospholipase C [Caenorhabditis elegans]
novel_mir7	NM_065551.3	-34.4	0.011785	-32.79	167	T23F11.4	GO:0005634,GO:0044212,GO:0046872,GO:0043565,GO:0003700,GO:0006355,GO:0019915,	-	gi|17555240|ref|NP_497952.1|	0	Uncharacterized protein CELE_T23F11.4 [Caenorhabditis elegans]
novel_mir7	NM_062755.6	-33	0.094303	-29.64	159	tbc-2	GO:0005770,GO:0017137,GO:0005096,GO:0090630,GO:0000003,GO:0031338,GO:0006886,GO:0009792,	K20166|1|0.0|1881|cel:CELE_ZK1248.10|TBC1 domain family member 2B	gi|17538089|ref|NP_495156.1|	0	TBC (Tre-2/Bub2/Cdc16) domain family [Caenorhabditis elegans]
novel_mir7	NM_065618.1	-27.7	0.082827	-27.11	151	C35D10.13	GO:0006915,GO:0009792,GO:0048477,	-	gi|17552506|ref|NP_498019.1|	7.01464e-99	Uncharacterized protein CELE_C35D10.13 [Caenorhabditis elegans]
novel_mir7	NM_001313106.1	-29	0.519937	-46.31	297	egl-8	GO:0005622,GO:0030424,GO:0005912,GO:0005886,GO:0045202,GO:0043204,GO:0004871,GO:0004435,GO:0005509,GO:0008340,GO:0043052,GO:0016246,GO:0016042,GO:0007320,GO:0034609,GO:0040017,GO:0035418,GO:0043051,GO:0007212,GO:0046662,GO:0009792,GO:0014057,GO:0006935,GO:0030163,GO:0035556,	K05858|1|0.0|1413|cel:CELE_B0348.4|phosphatidylinositol phospholipase C, beta [EC:3.1.4.11]	gi|922580930|ref|NP_001300035.1|	0	Phosphoinositide phospholipase C [Caenorhabditis elegans]
novel_mir7	NM_001307538.1	-34.5	0.266522	-50.01	311	eel-1	GO:0005737,GO:0005634,GO:0016874,GO:0004842,GO:0005515,GO:0045167,GO:0010468,GO:0031581,GO:0030178,GO:0042770,GO:0043065,GO:0042787,GO:0002119,GO:0009792,	K10592|1|0.0|8635|cel:CELE_Y67D8C.5|E3 ubiquitin-protein ligase HUWE1 [EC:2.3.2.26]	gi|808357882|ref|NP_001294467.1|	0	Enhancer of EfL-1 mutant phenotype [Caenorhabditis elegans]
novel_mir7	NM_076773.3	-29.9	0.145686	-25.55	155	C16E9.2	-	-	gi|17550490|ref|NP_509174.1|	0	Uncharacterized protein CELE_C16E9.2 [Caenorhabditis elegans]
novel_mir7	NM_001313553.1	-28.2	0.75173	-60.22	317	sea-2	GO:0005737,GO:0005634,GO:0003725,GO:0003727,GO:0009792,GO:0040034,GO:0007549,GO:0010629,GO:0008340,GO:0009408,	-	gi|922582100|ref|NP_001300482.1|	0	Signal Element on Autosome [Caenorhabditis elegans]
novel_mir7	NM_069591.2	-30	0.097329	-27.43	154	T25B9.2	GO:0004721,GO:0006470,	K01090|1|0.0|717|cel:CELE_Y69E1A.4|protein phosphatase [EC:3.1.3.16]!K06269|4|1.07e-90|279|dmo:Dmoj_GI18732|serine/threonine-protein phosphatase PP1 catalytic subunit [EC:3.1.3.16]	gi|392900580|ref|NP_501992.2|	0	Serine/threonine-protein phosphatase [Caenorhabditis elegans]
novel_mir7	NM_001313398.1	-29	0.799499	-65.87	465	fln-2	GO:0040011,GO:0018996,	K04437|1|0.0|5575|cel:CELE_C23F12.1|filamin	gi|922581563|ref|NP_509580.6|	0	FiLamiN (actin binding protein) homolog [Caenorhabditis elegans]
novel_mir7	NM_001026686.3	-34.4	0.224049	-29.44	157	vab-10	GO:0030056,GO:0009925,GO:0005882,GO:0016324,GO:0051015,GO:0040007,GO:0006898,GO:0048730,GO:0007050,GO:0040039,GO:0009792,GO:0002119,GO:0030163,GO:0010171,GO:0071688,GO:0040035,GO:0032940,	K10382|1|0.0|1425|tsp:Tsp_07976|dystonin	gi|71997221|ref|NP_001021857.1|	0	Uncharacterized protein CELE_ZK1151.1 [Caenorhabditis elegans]
novel_mir7	NR_131466.1	-25.6	0.700309	-49.46	320	pqn-75	-	-	-	-	-
novel_mir7	NM_001268226.1	-34.5	0.126036	-31.99	166	Y79H2A.3	GO:0006898,GO:0002119,GO:0040011,	-	gi|392896882|ref|NP_001255155.1|	0	Uncharacterized protein CELE_Y79H2A.3 [Caenorhabditis elegans]
novel_mir7	NM_065305.1	-27.7	0.684423	-59.28	340	golg-4	GO:0005622,GO:0000042,	K20283|1|5.36e-09|66.6|asn:102379065|golgin subfamily A member 4	gi|17553764|ref|NP_497706.1|	0	GOLGi associated coiled-coil protein homolog [Caenorhabditis elegans]
novel_mir7	NM_063867.2	-28.3	0.350328	-32.06	164	mab-10	GO:0005634,GO:0045892,	-	gi|392891519|ref|NP_496268.2|	0	Uncharacterized protein CELE_R166.1 [Caenorhabditis elegans]
novel_mir7	NM_001313087.1	-29	0.571191	-46.31	297	egl-8	GO:0005622,GO:0030424,GO:0005912,GO:0005886,GO:0045202,GO:0043204,GO:0004871,GO:0004435,GO:0005509,GO:0008340,GO:0043052,GO:0016246,GO:0016042,GO:0007320,GO:0034609,GO:0040017,GO:0035418,GO:0043051,GO:0007212,GO:0046662,GO:0009792,GO:0014057,GO:0006935,GO:0030163,GO:0035556,	K05858|1|0.0|2329|cbr:CBG06373|phosphatidylinositol phospholipase C, beta [EC:3.1.4.11]	gi|922580892|ref|NP_001300016.1|	0	Phosphoinositide phospholipase C [Caenorhabditis elegans]
novel_mir7	NM_058394.3	-27	0.598106	-50.78	301	nas-30	GO:0004222,GO:0008270,GO:0000003,GO:0006508,	K08076|1|2.12e-105|338|cel:CELE_K04E7.3|astacin [EC:3.4.24.21]	gi|392884714|ref|NP_490795.3|	0	Zinc metalloproteinase nas-30 [Caenorhabditis elegans]
novel_mir7	NM_069484.1	-26.2	0.283391	-25.4	165	Y43C5A.4	GO:0016021,	-	gi|17543394|ref|NP_501885.1|	3.72134e-154	Uncharacterized protein CELE_Y43C5A.4 [Caenorhabditis elegans]
novel_mir7	NM_171109.2	-25.1	0.646939	-27.52	161	wip-1	GO:0030479,GO:0005884,GO:0051015,GO:0005519,GO:0051666,GO:0043652,GO:0000147,GO:0008340,GO:0008360,GO:0051127,GO:0030334,GO:0031647,GO:0010172,GO:0030048,	K19475|1|7.76e-16|84.0|loa:LOAG_01040|WAS/WASL-interacting protein	gi|71989809|ref|NP_741122.2|	0	Wiskott-Aldrich syndrome protein (WASP)-Interacting Protein and gene assignment [Caenorhabditis elegans]
novel_mir7	NM_064372.6	-26.4	0.5542	-53.49	321	puf-6	GO:0005737,GO:0003730,GO:0017148,GO:0007049,GO:0051301,GO:0008285,GO:0006402,GO:0035188,GO:0048477,	K17943|1|8.30e-39|144|loa:LOAG_04126|pumilio RNA-binding family	gi|17535395|ref|NP_496773.1|	0	Pumilio domain-containing protein 6 [Caenorhabditis elegans]
novel_mir7	NM_064875.7	-32.5	0.024673	-31.02	162	rnp-5	GO:0003676,GO:0000166,GO:0009792,GO:0002119,GO:0042127,GO:0007281,GO:0040020,GO:0040011,	K14325|1|0.0|533|cel:CELE_K02F3.11|RNA-binding protein with serine-rich domain 1	gi|25145017|ref|NP_497276.2|	0	RNP (RRM RNA binding domain) containing [Caenorhabditis elegans]
novel_mir7	NM_170986.3	-28.7	0.163062	-25.31	156	shc-2	-	-	gi|25147891|ref|NP_740984.1|	0	SHC (Src Homology domain C-terminal) adaptor homolog [Caenorhabditis elegans]
novel_mir7	NM_001025939.5	-27.5	0.661787	-31.28	155	casy-1	GO:0016021,GO:0030424,GO:0032809,GO:0005615,GO:0005794,GO:0005158,GO:0005509,GO:0007156,GO:0034613,GO:0008355,GO:0009792,	K16500|1|9.04e-09|65.5|bmor:101741348|protocadherin-15!K05689|2|1.91e-08|63.9|sasa:106562057|cadherin 1, type 1, E-cadherin!K06796|3|2.04e-08|63.9|fpg:101921047|cadherin 3, type 1, P-cadherin!K16507|4|4.73e-08|63.2|sasa:106563875|protocadherin-16/23	gi|71980534|ref|NP_001021110.1|	0	CAlSYntenin/Alcadein homolog [Caenorhabditis elegans]
novel_mir7	NM_001029031.4	-36.8	0.43084	-53.3	300	ttn-1	GO:0031965,GO:0005865,GO:0031430,GO:0030018,GO:0005859,GO:0046872,GO:0008307,GO:0097493,GO:0004674,GO:0051371,GO:0051015,GO:0005524,GO:0006941,GO:0045214,GO:0009792,GO:0006468,GO:0007015,GO:0071688,	K12567|1|0.0|894|tsp:Tsp_05689|titin [EC:2.7.11.1]	gi|72000919|ref|NP_001024202.1|	0	TiTiN family [Caenorhabditis elegans]
novel_mir7	NM_001027854.2	-27.1	0.630792	-105.13	614	grl-25	-	-	gi|71997822|ref|NP_001023025.1|	0	GRound-Like (grd related) [Caenorhabditis elegans]
novel_mir7	NM_064645.4	-34	0.194189	-72.41	444	unc-52	GO:0005604,GO:0005509,GO:0005198,GO:0016477,GO:0008340,GO:0071688,GO:0016358,GO:0031581,GO:0000003,GO:0018996,GO:0048644,GO:0061199,GO:0008543,GO:0002119,GO:0040017,GO:0006898,GO:0030163,GO:0009792,	K06255|1|0.0|674|cjc:100413695|heparan sulfate proteoglycan 2 (perlecan)	gi|17536621|ref|NP_497046.1|	0	Basement membrane proteoglycan [Caenorhabditis elegans]
novel_mir7	NM_075897.2	-29.3	0.230156	-26.65	158	wrt-9	-	-	gi|71981589|ref|NP_508298.2|	0	WaRThog (hedgehog-like family) [Caenorhabditis elegans]
novel_mir7	NM_064646.4	-34	0.085064	-51.21	296	unc-52	GO:0005604,GO:0005509,GO:0005198,GO:0016477,GO:0008340,GO:0071688,GO:0016358,GO:0031581,GO:0000003,GO:0018996,GO:0048644,GO:0061199,GO:0008543,GO:0002119,GO:0040017,GO:0006898,GO:0030163,GO:0009792,	K06255|1|6.21e-121|418|lav:100668646|heparan sulfate proteoglycan 2 (perlecan)	gi|17536623|ref|NP_497047.1|	0	Basement membrane proteoglycan [Caenorhabditis elegans]
novel_mir7	NM_001129259.2	-30.5	0.14485	-117.63	646	Y49E10.29	GO:0016021,	-	gi|193210926|ref|NP_001122731.1|	0	Uncharacterized protein CELE_Y49E10.29 [Caenorhabditis elegans]
novel_mir7	NM_001313423.1	-32.3	0.152414	-51.05	318	bet-2	-	K11722|1|1.53e-51|203|tup:102470944|bromodomain-containing protein 4!K08871|5|2.11e-49|193|pbi:103052955|bromodomain-containing protein 2	gi|25152243|ref|NP_509770.2|	0	BET (two bromodomains) family protein [Caenorhabditis elegans]
novel_mir7	NM_001027844.2	-28.8	0.32249	-25.65	156	lin-9	GO:0070176,GO:0007049,GO:0040027,GO:0040035,GO:0045138,GO:0006355,GO:0008584,GO:0010171,GO:0040011,GO:0009792,	-	gi|71997724|ref|NP_001023015.1|	0	Protein lin-9 [Caenorhabditis elegans]
novel_mir7	NM_075201.4	-28.1	0.225068	-26.22	163	ZK262.2	GO:0005576,GO:0016787,GO:0016042,	-	gi|17566824|ref|NP_507602.1|	0	Uncharacterized protein CELE_ZK262.2 [Caenorhabditis elegans]
novel_mir7	NM_001276805.1	-27.9	0.643475	-50.57	316	pod-1	GO:0051285,GO:0032154,GO:0051015,GO:0009792,GO:0008340,GO:0006915,GO:0048477,	K18619|1|0.0|2169|cel:CELE_Y76A2B.1|coronin-7	gi|453232062|ref|NP_001263734.1|	0	Uncharacterized protein CELE_Y76A2B.1 [Caenorhabditis elegans]
novel_mir7	NM_065906.4	-30.9	0.115808	-27.52	164	gcna-1	GO:0045132,	-	gi|17556881|ref|NP_498307.1|	0	Uncharacterized protein CELE_ZK328.4 [Caenorhabditis elegans]
novel_mir7	NM_059480.3	-29	0.203719	-25.27	153	nuo-2	GO:0005747,GO:0003723,GO:0008137,GO:0008340,GO:0055114,GO:0002119,GO:0006898,GO:0009792,	K03936|1|0.0|920|cel:CELE_T10E9.7|NADH dehydrogenase (ubiquinone) Fe-S protein 3 [EC:1.6.5.3 1.6.99.3]	gi|71990788|ref|NP_491881.2|	0	NADH Ubiquinone Oxidoreductase [Caenorhabditis elegans]
novel_mir7	NM_001276860.1	-31.4	0.049174	-25.74	161	C10C6.3	-	-	gi|453232234|ref|NP_001263789.1|	0	Uncharacterized protein CELE_C10C6.3 [Caenorhabditis elegans]
novel_mir7	NM_062286.3	-30.1	0.060412	-26.04	158	F53C3.6	GO:0016021,	K07819|1|3.80e-06|52.8|cbr:CBG09575|beta-1,3-galactosyltransferase 1 [EC:2.4.1.-]	gi|71990168|ref|NP_494687.2|	0	Uncharacterized protein CELE_F53C3.6 [Caenorhabditis elegans]
novel_mir7	NM_076774.3	-29.9	0.006371	-25.55	155	C16E9.2	-	-	gi|17550492|ref|NP_509175.1|	1.28093e-40	Uncharacterized protein CELE_C16E9.2 [Caenorhabditis elegans]
novel_mir7	NM_078341.1	-26.1	0.796547	-25.74	160	F52G3.3	GO:0003678,GO:0032508,GO:0006281,GO:0000723,	K15255|1|3.05e-19|97.8|api:103311494|ATP-dependent DNA helicase PIF1 [EC:3.6.4.12]	gi|17568025|ref|NP_510742.1|	0	Uncharacterized protein CELE_F52G3.3 [Caenorhabditis elegans]
novel_mir7	NM_077935.6	-28.1	0.684763	-27.12	159	tbc-19	-	K20166|1|0.0|2785|cel:CELE_C31E10.8|TBC1 domain family member 2B	gi|392927864|ref|NP_510336.3|	0	TBC (Tre-2/Bub2/Cdc16) domain family [Caenorhabditis elegans]
novel_mir7	NM_066943.4	-25.1	0.747619	-43.63	301	Y39A1A.9	-	-	gi|71993256|ref|NP_499344.2|	0	Uncharacterized protein CELE_Y39A1A.9 [Caenorhabditis elegans]
novel_mir7	NM_001136297.2	-35.2	0.035605	-27.61	164	dlk-1	GO:0005929,GO:0005737,GO:0030425,GO:0043025,GO:0030424,GO:0030054,GO:0045202,GO:0008022,GO:0046872,GO:0031625,GO:0004709,GO:0005524,GO:0000186,GO:0046777,GO:0045773,GO:0048677,GO:0050807,GO:0002119,GO:1903616,GO:0048689,	K04422|1|0.0|1774|cel:CELE_F33E2.2|mitogen-activated protein kinase kinase kinase 13 [EC:2.7.11.25]!K04423|2|0.0|1429|cbr:CBG08707|mitogen-activated protein kinase kinase kinase 12 [EC:2.7.11.25]	gi|71985415|ref|NP_001021443.1|	0	Mitogen-activated protein kinase kinase kinase dlk-1 [Caenorhabditis elegans]
novel_mir7	NM_073080.4	-25.2	0.349837	-25.9	151	T06E4.9	-	-	gi|453232433|ref|NP_505481.2|	4.56859e-107	Uncharacterized protein CELE_T06E4.9 [Caenorhabditis elegans]
novel_mir7	NM_001026023.2	-25.1	0.767117	-53.5	316	sel-8	GO:0005634,GO:0040035,GO:0006355,GO:0040020,GO:0035188,GO:0002119,GO:0042127,GO:0006898,GO:0009792,GO:0051729,	-	gi|71982666|ref|NP_001021194.1|	0	Protein lag-3 [Caenorhabditis elegans]
novel_mir7	NM_060942.3	-30	0.214271	-25.22	155	pde-1	GO:0046872,GO:0047555,GO:0005516,GO:0004115,GO:0010446,GO:0008340,GO:0010628,GO:0007602,GO:0042542,GO:0010754,GO:0007635,GO:0070482,GO:0090038,GO:0006935,GO:0046069,GO:0030827,GO:2000114,	K13755|1|0.0|1385|cel:CELE_T04D3.3|calcium/calmodulin-dependent 3',5'-cyclic nucleotide phosphodiesterase [EC:3.1.4.17]!K13293|2|0.0|1161|cbr:CBG20362|cAMP-specific phosphodiesterase 4 [EC:3.1.4.53]	gi|17508855|ref|NP_493343.1|	0	Probable 3',5'-cyclic phosphodiesterase pde-1 [Caenorhabditis elegans]
novel_mir7	NM_001029032.3	-36.8	0.430615	-53.3	300	ttn-1	GO:0031965,GO:0005865,GO:0031430,GO:0030018,GO:0005859,GO:0046872,GO:0008307,GO:0097493,GO:0004674,GO:0051371,GO:0051015,GO:0005524,GO:0006941,GO:0045214,GO:0009792,GO:0006468,GO:0007015,GO:0071688,	K12567|1|0.0|899|tsp:Tsp_05689|titin [EC:2.7.11.1]	gi|72000921|ref|NP_001024203.1|	0	TiTiN family [Caenorhabditis elegans]
novel_mir7	NM_001026684.3	-32.8	0.494486	-27.99	168	vab-10	GO:0030056,GO:0009925,GO:0005882,GO:0016324,GO:0051015,GO:0040007,GO:0006898,GO:0048730,GO:0007050,GO:0040039,GO:0009792,GO:0002119,GO:0030163,GO:0010171,GO:0071688,GO:0040035,GO:0032940,	K10382|1|0.0|996|dme:Dmel_CG18076|dystonin	gi|71997207|ref|NP_001021855.1|	0	Uncharacterized protein CELE_ZK1151.1 [Caenorhabditis elegans]
novel_mir7	NM_001027089.5	-27.1	0.777957	-45	310	ifg-1	GO:0016281,GO:0005829,GO:0003743,GO:0006413,GO:0008340,GO:0006915,GO:0009408,GO:0010171,GO:0019915,GO:0002119,GO:0007281,GO:0009792,GO:0008406,GO:0040018,	K03260|1|0.0|2398|cel:CELE_M110.4|translation initiation factor 4G	gi|71992752|ref|NP_001022260.1|	0	Initiation Factor 4G (eIF4G) family [Caenorhabditis elegans]
novel_mir7	NM_066185.4	-30.4	0.092531	-26.83	158	R151.2	-	K00948|1|0.0|759|cbr:CBG16623|ribose-phosphate pyrophosphokinase [EC:2.7.6.1]	gi|453231964|ref|NP_498586.2|	0	Uncharacterized protein CELE_R151.2 [Caenorhabditis elegans]
novel_mir7	NM_064134.5	-32.7	0.027836	-26.3	158	col-84	GO:0005581,GO:0042302,GO:0009792,GO:0000003,GO:0010171,GO:0002119,	K08131|1|6.32e-11|68.6|amj:102570843|collagen, type IX, alpha!K19719|5|7.78e-09|62.4|tru:101071943|collagen, type II, alpha	gi|17535069|ref|NP_496535.1|	0	COLlagen [Caenorhabditis elegans]
novel_mir7	NM_073882.3	-25.9	0.455057	-45.33	303	col-159	GO:0016021,GO:0005581,GO:0042302,	K10599|1|6.39e-31|127|tsp:Tsp_00442|pre-mRNA-processing factor 19 [EC:2.3.2.27]!K08202|2|4.80e-18|89.7|tsp:Tsp_05167|MFS transporter, OCT family, solute carrier family 22 (organic cation transporter), member 4/5!K06236|3|4.99e-14|77.8|ola:100144368|collagen, type I, alpha	gi|17561542|ref|NP_506283.1|	0	COLlagen [Caenorhabditis elegans]
novel_mir7	NM_071167.4	-33.5	0.010177	-29.63	162	clec-207	GO:0030246,GO:0006915,GO:0048477,	K06794|1|2.66e-06|52.8|hgl:101714302|neurocan core protein	gi|17560636|ref|NP_503568.1|	3.17838e-164	C-type LECtin [Caenorhabditis elegans]
novel_mir7	NM_060128.2	-29	0.240289	-27.98	165	set-32	-	K11433|1|1.36e-16|85.5|tru:101063240|histone-lysine N-methyltransferase SETMAR [EC:2.1.1.43]!K11420|2|3.44e-16|87.4|shr:100932927|euchromatic histone-lysine N-methyltransferase [EC:2.1.1.43]!K11419|4|6.21e-16|86.3|dvi:Dvir_GJ24041|histone-lysine N-methyltransferase SUV39H [EC:2.1.1.43]	gi|212640689|ref|NP_492529.2|	0	SET (trithorax/polycomb) domain containing [Caenorhabditis elegans]
novel_mir7	NM_171672.3	-29.8	0.526447	-29.02	178	pqn-65	-	-	gi|25150407|ref|NP_741772.1|	0	Prion-like-(Q/N-rich)-domain-bearing protein [Caenorhabditis elegans]
novel_mir7	NM_001348621.1	-32.8	0.492973	-27.99	168	vab-10	GO:0030056,GO:0009925,GO:0005882,GO:0016324,GO:0051015,GO:0040007,GO:0006898,GO:0048730,GO:0007050,GO:0040039,GO:0009792,GO:0002119,GO:0030163,GO:0010171,GO:0071688,GO:0040035,GO:0032940,	K10382|1|0.0|1005|dme:Dmel_CG18076|dystonin	gi|71997204|ref|NP_001021854.1|	0	Uncharacterized protein CELE_ZK1151.1 [Caenorhabditis elegans]
novel_mir7	NM_001268228.1	-34.5	0.080772	-31.99	166	Y79H2A.3	GO:0006898,GO:0002119,GO:0040011,	-	gi|392896886|ref|NP_001022955.2|	0	Uncharacterized protein CELE_Y79H2A.3 [Caenorhabditis elegans]
novel_mir7	NM_077330.3	-31.1	0.201797	-27.98	164	R07E3.6	-	-	gi|17569309|ref|NP_509731.1|	0	Uncharacterized protein CELE_R07E3.6 [Caenorhabditis elegans]
novel_mir7	NM_001313644.1	-31.9	0.179664	-60.22	317	sea-2	GO:0005737,GO:0005634,GO:0003725,GO:0003727,GO:0009792,GO:0040034,GO:0007549,GO:0010629,GO:0008340,GO:0009408,	-	gi|922582098|ref|NP_001300481.1|	0	Signal Element on Autosome [Caenorhabditis elegans]
novel_mir7	NM_001267514.1	-28.6	0.797658	-72.41	444	unc-52	GO:0005604,GO:0005509,GO:0005198,GO:0016477,GO:0008340,GO:0071688,GO:0016358,GO:0031581,GO:0000003,GO:0018996,GO:0048644,GO:0061199,GO:0008543,GO:0002119,GO:0040017,GO:0006898,GO:0030163,GO:0009792,	K06255|1|0.0|629|cjc:100413695|heparan sulfate proteoglycan 2 (perlecan)	gi|392892558|ref|NP_001254443.1|	0	Uncharacterized protein CELE_ZC101.2 [Caenorhabditis elegans]
novel_mir7	NM_058821.5	-26.1	0.36632	-25.16	154	C32E8.9	GO:0003824,GO:0008152,	K18426|1|0.0|551|cel:CELE_C32E8.9|ethylmalonyl-CoA/methylmalonyl-CoA decarboxylase [EC:4.1.1.94 4.1.1.41]	gi|25141363|ref|NP_491222.2|	0	Uncharacterized protein CELE_C32E8.9 [Caenorhabditis elegans]
novel_mir7	NM_001307001.1	-26.3	0.711195	-26.98	164	eps-8	GO:0030056,GO:0005903,GO:0045177,GO:0051015,GO:0000003,GO:0040027,GO:0006898,GO:0051017,GO:0040026,GO:0048730,GO:0040011,GO:0045185,GO:0009792,GO:0045109,GO:0048546,GO:0030421,GO:0048598,GO:0051016,	K17277|1|0.0|1429|cel:CELE_Y57G11C.24|epidermal growth factor receptor kinase substrate 8	gi|808356800|ref|NP_001293928.1|	0	EPS (human endocytosis) related [Caenorhabditis elegans]
novel_mir7	NM_059342.2	-28.7	0.181906	-30.42	167	C27A12.4	-	-	gi|392885775|ref|NP_491743.2|	0	Uncharacterized protein CELE_C27A12.4 [Caenorhabditis elegans]
novel_mir7	NM_001267515.1	-34	0.186551	-72.41	444	unc-52	GO:0005604,GO:0005509,GO:0005198,GO:0016477,GO:0008340,GO:0071688,GO:0016358,GO:0031581,GO:0000003,GO:0018996,GO:0048644,GO:0061199,GO:0008543,GO:0002119,GO:0040017,GO:0006898,GO:0030163,GO:0009792,	K06255|1|0.0|639|cjc:100413695|heparan sulfate proteoglycan 2 (perlecan)	gi|392892560|ref|NP_001254444.1|	0	Uncharacterized protein CELE_ZC101.2 [Caenorhabditis elegans]
novel_mir7	NM_062981.1	-29.4	0.231825	-28.54	152	F41G3.3	-	-	gi|17533897|ref|NP_495382.1|	0	Uncharacterized protein CELE_F41G3.3 [Caenorhabditis elegans]
novel_mir7	NM_001268364.2	-29.4	0.697919	-45.46	305	Y40C5A.3	-	-	gi|808356094|ref|NP_001255293.2|	0	Uncharacterized protein CELE_Y40C5A.3 [Caenorhabditis elegans]
novel_mir7	NM_066348.4	-36.2	0.00962	-31.48	168	mdt-30	GO:0009792,GO:0010171,GO:0006898,GO:0040011,	-	gi|17553434|ref|NP_498749.1|	0	Prion-like-(Q/N-rich) domain-bearing protein 38 [Caenorhabditis elegans]
novel_mir7	NM_001028350.4	-26.3	0.7842	-26.98	164	eps-8	GO:0030056,GO:0005903,GO:0045177,GO:0051015,GO:0000003,GO:0040027,GO:0006898,GO:0051017,GO:0040026,GO:0048730,GO:0040011,GO:0045185,GO:0009792,GO:0045109,GO:0048546,GO:0030421,GO:0048598,GO:0051016,	K17277|1|0.0|1737|cel:CELE_Y57G11C.24|epidermal growth factor receptor kinase substrate 8	gi|115534495|ref|NP_502803.3|	0	EPS (human endocytosis) related [Caenorhabditis elegans]
novel_mir7	NM_171863.3	-25.1	0.644608	-27.52	161	wip-1	GO:0030479,GO:0005884,GO:0051015,GO:0005519,GO:0051666,GO:0043652,GO:0000147,GO:0008340,GO:0008360,GO:0051127,GO:0030334,GO:0031647,GO:0010172,GO:0030048,	K19475|1|3.80e-16|84.7|loa:LOAG_01040|WAS/WASL-interacting protein	gi|71989801|ref|NP_741123.2|	0	Wiskott-Aldrich syndrome protein (WASP)-Interacting Protein and gene assignment [Caenorhabditis elegans]
novel_mir7	NM_001322632.1	-28.3	0.297899	-51.36	318	abu-13	-	-	gi|32565682|ref|NP_498515.2|	0	Activated in Blocked Unfolded protein response [Caenorhabditis elegans]
novel_mir7	NM_060236.4	-33.6	0.025256	-30.7	164	T23D8.3	GO:0040035,GO:0009792,GO:0002119,GO:0016246,GO:0040007,	K14798|1|0.0|829|cel:CELE_T23D8.3|protein LTV1	gi|17509195|ref|NP_492637.1|	0	Protein LTV1 homolog [Caenorhabditis elegans]
novel_mir7	NM_001029569.2	-33.2	0.075396	-28.1	168	eat-20	GO:0009986,GO:0030424,GO:0016021,GO:0005509,GO:0040035,GO:0030163,	K02599|1|5.71e-17|91.3|crg:105322166|Notch 1!K17495|4|1.35e-15|87.4|tup:102500773|CUB and sushi domain-containing protein	gi|71992678|ref|NP_001024740.1|	0	Abnormal pharyngeal pumping eat-20 [Caenorhabditis elegans]
novel_mir7	NM_181929.4	-26.6	0.72185	-25.94	150	T28D6.5	GO:0016021,GO:0009792,GO:0040007,GO:0040035,GO:0002119,	-	gi|392896717|ref|NP_001255123.1|	0	Uncharacterized protein CELE_T28D6.5 [Caenorhabditis elegans]
novel_mir7	NM_001313402.1	-29	0.762881	-65.87	465	fln-2	GO:0040011,GO:0018996,	K04437|1|0.0|4949|cel:CELE_C23F12.1|filamin	gi|922581563|ref|NP_509580.6|	0	FiLamiN (actin binding protein) homolog [Caenorhabditis elegans]
novel_mir7	NM_001267466.1	-28.4	0.704362	-42.23	297	nep-17	GO:0016021,GO:0045121,GO:0004222,GO:0006508,	K08635|1|1.41e-118|408|sko:102800538|membrane metallo-endopeptidase-like 1!K01415|5|1.04e-82|296|cbr:CBG17774|endothelin-converting enzyme [EC:3.4.24.71]	gi|392892296|ref|NP_001254395.1|	0	NEPrilysin metallopeptidase family [Caenorhabditis elegans]
novel_mir7	NM_001026814.3	-39	0.00236	-36.11	168	hel-1	GO:0005681,GO:0005667,GO:0003723,GO:0004004,GO:0005524,GO:0008340,GO:0010628,GO:0006406,GO:0006974,GO:0006915,GO:0009792,GO:0002119,GO:0010171,GO:0000398,GO:0010501,GO:0040035,	K12812|1|0.0|854|cbr:CBG00694|ATP-dependent RNA helicase UAP56/SUB2 [EC:3.6.4.13]	gi|71982858|ref|NP_001021985.1|	0	Spliceosome RNA helicase DDX39B homolog [Caenorhabditis elegans]
novel_mir7	NM_001313086.1	-29	0.595316	-46.31	297	egl-8	GO:0005622,GO:0030424,GO:0005912,GO:0005886,GO:0045202,GO:0043204,GO:0004871,GO:0004435,GO:0005509,GO:0008340,GO:0043052,GO:0016246,GO:0016042,GO:0007320,GO:0034609,GO:0040017,GO:0035418,GO:0043051,GO:0007212,GO:0046662,GO:0009792,GO:0014057,GO:0006935,GO:0030163,GO:0035556,	K05858|1|0.0|3107|cel:CELE_B0348.4|phosphatidylinositol phospholipase C, beta [EC:3.1.4.11]	gi|922580890|ref|NP_001300015.1|	0	Phosphoinositide phospholipase C [Caenorhabditis elegans]
novel_mir7	NM_001313551.1	-28.2	0.77882	-60.22	317	sea-2	GO:0005737,GO:0005634,GO:0003725,GO:0003727,GO:0009792,GO:0040034,GO:0007549,GO:0010629,GO:0008340,GO:0009408,	-	gi|922582096|ref|NP_001300480.1|	0	Signal Element on Autosome [Caenorhabditis elegans]
novel_mir7	NM_078296.5	-26.8	0.143434	-27.49	148	F22H10.6	-	-	gi|392928248|ref|NP_510697.2|	6.64283e-115	Uncharacterized protein CELE_F22H10.6 [Caenorhabditis elegans]
novel_mir7	NM_001267183.1	-25.5	0.660392	-42.84	299	F13H8.5	-	-	gi|392890265|ref|NP_001254112.1|	0	Uncharacterized protein CELE_F13H8.5 [Caenorhabditis elegans]
novel_mir7	NM_069703.6	-29.4	0.125816	-25.56	163	R07H5.8	GO:0004001,GO:0005515,GO:0006166,GO:0032940,GO:0002119,GO:0006167,GO:0006898,	K00856|1|0.0|707|cel:CELE_R07H5.8|adenosine kinase [EC:2.7.1.20]	gi|17541820|ref|NP_502104.1|	0	Uncharacterized protein CELE_R07H5.8 [Caenorhabditis elegans]
novel_mir7	NM_001025905.3	-31.3	0.110516	-27.74	161	D2030.2	GO:0005759,GO:0004176,GO:0005524,GO:0071688,GO:0006508,GO:0002119,GO:0006898,GO:0030163,	K03544|1|0.0|1209|cel:CELE_D2030.2|ATP-dependent Clp protease ATP-binding subunit ClpX	gi|71982905|ref|NP_001021076.1|	0	Uncharacterized protein CELE_D2030.2 [Caenorhabditis elegans]
novel_mir7	NM_001028401.2	-35.4	0.004757	-32.68	175	Y73B6BL.44	-	-	gi|392899228|ref|NP_001023572.2|	0	Uncharacterized protein CELE_Y73B6BL.44 [Caenorhabditis elegans]
novel_mir7	NM_001313399.1	-29.2	0.724899	-65.87	465	fln-2	GO:0040011,GO:0018996,	K04437|1|0.0|3217|cel:CELE_C23F12.1|filamin	gi|922581622|ref|NP_001300320.1|	0	FiLamiN (actin binding protein) homolog [Caenorhabditis elegans]
novel_mir7	NM_075204.1	-37.2	0.000181	-33.49	173	ZK262.4	-	-	gi|17566828|ref|NP_507605.1|	1.56231e-49	Uncharacterized protein CELE_ZK262.4 [Caenorhabditis elegans]
novel_mir7	NM_065768.1	-29.5	0.067733	-25.73	156	R02F2.5	GO:0005515,	-	gi|17554454|ref|NP_498169.1|	5.10236e-156	Uncharacterized protein CELE_R02F2.5 [Caenorhabditis elegans]
novel_mir7	NM_001268192.1	-26.6	0.723234	-25.94	150	T28D6.5	GO:0016021,GO:0009792,GO:0040007,GO:0040035,GO:0002119,	-	gi|392896711|ref|NP_001255121.1|	0	Uncharacterized protein CELE_T28D6.5 [Caenorhabditis elegans]
novel_mir7	NM_001313102.1	-29	0.537712	-46.31	297	egl-8	GO:0005622,GO:0030424,GO:0005912,GO:0005886,GO:0045202,GO:0043204,GO:0004871,GO:0004435,GO:0005509,GO:0008340,GO:0043052,GO:0016246,GO:0016042,GO:0007320,GO:0034609,GO:0040017,GO:0035418,GO:0043051,GO:0007212,GO:0046662,GO:0009792,GO:0014057,GO:0006935,GO:0030163,GO:0035556,	K05858|1|0.0|1634|loa:LOAG_00068|phosphatidylinositol phospholipase C, beta [EC:3.1.4.11]	gi|922580922|ref|NP_001300031.1|	0	Phosphoinositide phospholipase C [Caenorhabditis elegans]
novel_mir7	NM_171211.3	-27.9	0.322727	-27.35	157	fbxl-1	GO:0035882,GO:0071688,GO:0043053,	K10268|1|0.0|942|cel:CELE_C02F5.7|F-box and leucine-rich repeat protein 2/20	gi|25151694|ref|NP_741249.1|	0	Uncharacterized F-box/LRR-repeat protein C02F5.7 [Caenorhabditis elegans]
novel_mir7	NM_070254.4	-27.2	0.15414	-50.84	321	rpl-18	GO:0022625,GO:0003723,GO:0003735,GO:0006412,GO:0006915,GO:0000003,GO:0018996,GO:0002119,GO:0006898,GO:0009792,	K02883|1|6.74e-135|379|cel:CELE_Y45F10D.12|large subunit ribosomal protein L18e	gi|17542002|ref|NP_502655.1|	5.60814e-134	60S ribosomal protein L18 [Caenorhabditis elegans]
novel_mir7	NM_069640.1	-30	0.10926	-27.43	154	Y69E1A.4	GO:0004721,GO:0006470,	K01090|1|0.0|786|cel:CELE_Y69E1A.4|protein phosphatase [EC:3.1.3.16]!K06269|4|5.30e-91|281|dmo:Dmoj_GI18732|serine/threonine-protein phosphatase PP1 catalytic subunit [EC:3.1.3.16]	gi|17544062|ref|NP_502041.1|	0	Serine/threonine-protein phosphatase [Caenorhabditis elegans]
novel_mir7	NM_001306394.1	-28.2	0.223108	-25.91	153	dot-1.1	GO:0005634,GO:0031151,GO:0051726,GO:0034729,	K11427|1|0.0|743|cel:CELE_Y39G10AR.18|histone-lysine N-methyltransferase, H3 lysine-79 specific [EC:2.1.1.43]	gi|71994293|ref|NP_740808.2|	0	Histone-lysine N-methyltransferase, H3 lysine-79 specific [Caenorhabditis elegans]
novel_mir7	NM_001306396.1	-28.2	0.763567	-29.11	151	let-526	GO:0031932,GO:0090544,GO:0005737,GO:0031931,GO:0016303,GO:0004674,GO:0003677,GO:0005524,GO:0044877,GO:0008340,GO:0036092,GO:0018991,GO:0000492,GO:0040027,GO:0040007,GO:0006898,GO:0010629,GO:0043053,GO:0040011,GO:0006915,GO:0045727,GO:0009792,GO:0006468,GO:0006338,GO:0009408,GO:0007413,GO:0010171,GO:1903935,GO:0045944,GO:0031929,GO:0040035,GO:0048382,GO:0046854,GO:0006281,	K11653|1|0.0|3491|cel:CELE_C01G8.9|AT-rich interactive domain-containing protein 1	gi|808354853|ref|NP_001293325.1|	0	Uncharacterized protein CELE_C01G8.9 [Caenorhabditis elegans]
novel_mir7	NM_071022.5	-29.2	0.160012	-26.59	158	pqn-54	GO:0005515,GO:0006952,GO:0008340,	-	gi|17563034|ref|NP_503423.1|	0	Prion-like-(Q/N-rich)-domain-bearing protein [Caenorhabditis elegans]
novel_mir7	NM_001027447.3	-32.2	0.092776	-29.58	161	ndg-4	GO:0016021,GO:0009792,GO:0010171,	K01183|1|1.22e-19|99.0|api:100169337|chitinase [EC:3.2.1.14]	gi|71987043|ref|NP_001022618.1|	0	Uncharacterized protein CELE_F56F3.2 [Caenorhabditis elegans]
novel_mir7	NM_065715.4	-30.3	0.297481	-28.74	157	sumv-1	GO:0005737,GO:0030424,GO:0005634,GO:0040027,GO:0016246,	-	gi|32565526|ref|NP_498116.2|	0	Protein sumv-1 [Caenorhabditis elegans]
novel_mir7	NM_075517.3	-28.2	0.711278	-28.62	154	Y113G7C.1	GO:0016021,GO:0004725,GO:0009792,GO:0035335,	K18027|1|3.42e-28|120|ggo:101138737|tyrosine-protein phosphatase non-receptor type 3 [EC:3.1.3.48]	gi|17566500|ref|NP_507918.1|	0	Protein-tyrosine-phosphatase [Caenorhabditis elegans]
novel_mir7	NM_001270257.1	-30.9	0.033214	-25.51	155	F57G12.2	-	-	gi|392927530|ref|NP_001257186.1|	3.2036e-158	Uncharacterized protein CELE_F57G12.2 [Caenorhabditis elegans]
novel_mir7	NM_171312.3	-25.6	0.725926	-49.46	320	pqn-75	-	-	gi|25152837|ref|NP_741366.1|	0	Prion-like-(Q/N-rich)-domain-bearing protein [Caenorhabditis elegans]
novel_mir7	NM_001313397.1	-29.2	0.744785	-65.87	465	fln-2	GO:0040011,GO:0018996,	K04437|1|0.0|3512|cel:CELE_C23F12.1|filamin	gi|922581622|ref|NP_001300320.1|	0	FiLamiN (actin binding protein) homolog [Caenorhabditis elegans]
novel_mir7	NM_071606.4	-33.7	0.068637	-29.71	152	T22F3.3	GO:0005737,GO:0008184,GO:0030170,GO:0009792,GO:0005980,	K00688|1|0.0|1837|cel:CELE_T22F3.3|glycogen phosphorylase [EC:2.4.1.1]	gi|17564550|ref|NP_504007.1|	0	Alpha-1,4 glucan phosphorylase [Caenorhabditis elegans]
novel_mir7	NM_001262315.2	-30.6	0.408463	-25.79	159	itx-1	GO:0016021,GO:0005912,GO:0016323,	K07380|1|1.84e-22|111|acs:100562824|contactin associated protein-like 2	gi|808354471|ref|NP_001249244.2|	0	InTestinal NeureXin-like [Caenorhabditis elegans]
novel_mir7	NM_001267519.1	-26.5	0.747972	-49.91	301	glna-1	GO:0005759,GO:0004359,GO:0006537,GO:0006543,	K01425|1|0.0|1736|cel:CELE_C09F9.3|glutaminase [EC:3.5.1.2]	gi|392892575|ref|NP_001254448.1|	0	GLutamiNAse [Caenorhabditis elegans]
novel_mir7	NM_066184.6	-30.4	0.074109	-26.83	158	R151.2	-	K00948|1|0.0|657|cel:CELE_R151.2|ribose-phosphate pyrophosphokinase [EC:2.7.6.1]	gi|453231962|ref|NP_001022728.2|	0	Uncharacterized protein CELE_R151.2 [Caenorhabditis elegans]
novel_mir7	NM_001306546.1	-28.2	0.761291	-60.22	317	sea-2	GO:0005737,GO:0005634,GO:0003725,GO:0003727,GO:0009792,GO:0040034,GO:0007549,GO:0010629,GO:0008340,GO:0009408,	-	gi|922582096|ref|NP_001300480.1|	0	Signal Element on Autosome [Caenorhabditis elegans]
novel_mir7	NM_068297.3	-33.5	0.025937	-31.16	161	ssq-2	GO:0040011,	K13073|1|1.10e-11|72.0|fab:101818342|polymeric immunoglobulin receptor	gi|17542096|ref|NP_500698.1|	0	Sperm-Specific family, class Q [Caenorhabditis elegans]
novel_mir7	NM_001270016.1	-30.5	0.547729	-97.89	501	mlt-11	GO:0004867,GO:0009792,GO:0002119,GO:0010951,GO:0018996,GO:0040011,	K03909|1|5.10e-31|130|cmy:102938937|tissue factor pathway inhibitor	gi|392923283|ref|NP_001256945.1|	0	Uncharacterized protein CELE_W01F3.3 [Caenorhabditis elegans]
novel_mir7	NM_001307539.1	-34.5	0.266633	-50.01	311	eel-1	GO:0005737,GO:0005634,GO:0016874,GO:0004842,GO:0005515,GO:0045167,GO:0010468,GO:0031581,GO:0030178,GO:0042770,GO:0043065,GO:0042787,GO:0002119,GO:0009792,	K10592|1|0.0|8630|cel:CELE_Y67D8C.5|E3 ubiquitin-protein ligase HUWE1 [EC:2.3.2.26]	gi|808357884|ref|NP_001294468.1|	0	Enhancer of EfL-1 mutant phenotype [Caenorhabditis elegans]
novel_mir7	NM_075522.2	-26.7	0.777354	-28.08	164	grd-11	-	K06224|1|4.90e-18|92.8|phu:Phum_PHUM018090|hedgehog!K11989|2|4.34e-16|87.0|xma:102229925|indian hedgehog!K11990|4|7.66e-16|87.4|tng:GSTEN00028082G001|desert hedgehog	gi|193208286|ref|NP_507923.2|	0	GRounDhog (hedgehog-like family) [Caenorhabditis elegans]
novel_mir7	NM_001307252.1	-29.4	0.672732	-45.46	305	Y40C5A.3	-	-	gi|808357306|ref|NP_001294181.1|	0	Uncharacterized protein CELE_Y40C5A.3 [Caenorhabditis elegans]
novel_mir7	NM_001348624.1	-32.8	0.391017	-27.99	168	vab-10	GO:0030056,GO:0009925,GO:0005882,GO:0016324,GO:0051015,GO:0040007,GO:0006898,GO:0048730,GO:0007050,GO:0040039,GO:0009792,GO:0002119,GO:0030163,GO:0010171,GO:0071688,GO:0040035,GO:0032940,	K10382|1|0.0|999|dme:Dmel_CG18076|dystonin	gi|71997204|ref|NP_001021854.1|	0	Uncharacterized protein CELE_ZK1151.1 [Caenorhabditis elegans]
novel_mir7	NM_060412.4	-29.5	0.004369	-26.32	152	B0205.5	-	-	gi|115533740|ref|NP_492813.2|	4.31228e-25	Uncharacterized protein CELE_B0205.5 [Caenorhabditis elegans]
novel_mir7	NM_001270014.1	-30.5	0.570049	-97.89	501	mlt-11	GO:0004867,GO:0009792,GO:0002119,GO:0010951,GO:0018996,GO:0040011,	K03909|1|9.43e-31|132|tgu:100228168|tissue factor pathway inhibitor	gi|392923279|ref|NP_001256943.1|	0	Uncharacterized protein CELE_W01F3.3 [Caenorhabditis elegans]
novel_mir7	NM_066966.6	-29.5	0.168157	-26.31	164	tbb-1	GO:0045298,GO:0005737,GO:0005876,GO:0005525,GO:0003924,GO:0005200,GO:0007017,GO:0035046,GO:0007052,GO:0040039,GO:0048675,GO:0009792,GO:0035047,GO:0002119,GO:0007281,GO:0030728,GO:0008152,GO:0040035,GO:0000212,	K07375|1|0.0|945|cel:CELE_K01G5.7|tubulin beta	gi|17553980|ref|NP_499367.1|	0	TuBulin, Beta [Caenorhabditis elegans]
novel_mir7	NM_063396.4	-35.7	0.016112	-28.77	165	T13H5.8	GO:0016021,GO:0006915,	-	gi|17536265|ref|NP_495797.1|	0	Uncharacterized protein CELE_T13H5.8 [Caenorhabditis elegans]
novel_mir7	NM_001313514.1	-28.9	0.271414	-27.74	157	pqn-72	GO:0019915,	-	gi|922581931|ref|NP_001300443.1|	0	Prion-like-(Q/N-rich)-domain-bearing protein [Caenorhabditis elegans]
novel_mir7	NM_001313094.1	-29	0.528329	-46.31	297	egl-8	GO:0005622,GO:0030424,GO:0005912,GO:0005886,GO:0045202,GO:0043204,GO:0004871,GO:0004435,GO:0005509,GO:0008340,GO:0043052,GO:0016246,GO:0016042,GO:0007320,GO:0034609,GO:0040017,GO:0035418,GO:0043051,GO:0007212,GO:0046662,GO:0009792,GO:0014057,GO:0006935,GO:0030163,GO:0035556,	K05858|1|0.0|1413|cel:CELE_B0348.4|phosphatidylinositol phospholipase C, beta [EC:3.1.4.11]	gi|922580906|ref|NP_001300023.1|	0	Phosphoinositide phospholipase C [Caenorhabditis elegans]
novel_mir7	NM_001313092.1	-29	0.551569	-46.31	297	egl-8	GO:0005622,GO:0030424,GO:0005912,GO:0005886,GO:0045202,GO:0043204,GO:0004871,GO:0004435,GO:0005509,GO:0008340,GO:0043052,GO:0016246,GO:0016042,GO:0007320,GO:0034609,GO:0040017,GO:0035418,GO:0043051,GO:0007212,GO:0046662,GO:0009792,GO:0014057,GO:0006935,GO:0030163,GO:0035556,	K05858|1|0.0|1635|cel:CELE_B0348.4|phosphatidylinositol phospholipase C, beta [EC:3.1.4.11]	gi|922580902|ref|NP_001300021.1|	0	Phosphoinositide phospholipase C [Caenorhabditis elegans]
novel_mir7	NM_001313089.1	-29	0.549138	-46.31	297	egl-8	GO:0005622,GO:0030424,GO:0005912,GO:0005886,GO:0045202,GO:0043204,GO:0004871,GO:0004435,GO:0005509,GO:0008340,GO:0043052,GO:0016246,GO:0016042,GO:0007320,GO:0034609,GO:0040017,GO:0035418,GO:0043051,GO:0007212,GO:0046662,GO:0009792,GO:0014057,GO:0006935,GO:0030163,GO:0035556,	K05858|1|0.0|1610|loa:LOAG_00068|phosphatidylinositol phospholipase C, beta [EC:3.1.4.11]	gi|922580896|ref|NP_001300018.1|	0	Phosphoinositide phospholipase C [Caenorhabditis elegans]
novel_mir7	NM_064419.5	-27	0.592233	-26.82	155	Y48C3A.12	-	-	gi|71998279|ref|NP_496820.3|	0	Uncharacterized protein CELE_Y48C3A.12 [Caenorhabditis elegans]
novel_mir7	NM_001027845.2	-28.8	0.323455	-25.65	156	lin-9	GO:0070176,GO:0007049,GO:0040027,GO:0040035,GO:0045138,GO:0006355,GO:0008584,GO:0010171,GO:0040011,GO:0009792,	-	gi|71997738|ref|NP_001023016.1|	0	Protein lin-9 [Caenorhabditis elegans]
novel_mir7	NM_001313088.1	-29	0.567991	-46.31	297	egl-8	GO:0005622,GO:0030424,GO:0005912,GO:0005886,GO:0045202,GO:0043204,GO:0004871,GO:0004435,GO:0005509,GO:0008340,GO:0043052,GO:0016246,GO:0016042,GO:0007320,GO:0034609,GO:0040017,GO:0035418,GO:0043051,GO:0007212,GO:0046662,GO:0009792,GO:0014057,GO:0006935,GO:0030163,GO:0035556,	K05858|1|0.0|2295|cbr:CBG06373|phosphatidylinositol phospholipase C, beta [EC:3.1.4.11]	gi|922580894|ref|NP_001300017.1|	0	Phosphoinositide phospholipase C [Caenorhabditis elegans]
novel_mir7	NM_065273.3	-28.6	0.542994	-28.66	164	Y53G8AL.1	-	-	gi|115534134|ref|NP_497674.3|	0	Uncharacterized protein CELE_Y53G8AL.1 [Caenorhabditis elegans]
novel_mir7	NM_069157.3	-31	0.305571	-61.67	321	C53B4.4	GO:0005622,GO:0046872,GO:0035556,	-	gi|392899885|ref|NP_501558.2|	0	Uncharacterized protein CELE_C53B4.4 [Caenorhabditis elegans]
novel_mir7	NM_171938.6	-32.1	0.234551	-30.66	159	mrp-1	GO:0005887,GO:0042626,GO:0005524,GO:0055085,GO:0040024,GO:0097501,GO:0016246,	K05665|1|0.0|3081|cel:CELE_F57C12.5|ATP-binding cassette, subfamily C (CFTR/MRP), member 1	gi|25146765|ref|NP_741702.1|	0	Uncharacterized protein CELE_F57C12.5 [Caenorhabditis elegans]
novel_mir7	NM_078418.3	-27.8	0.317428	-59.14	313	F10D7.5	GO:0008270,GO:0009792,GO:0000003,	K01931|1|0.0|863|cel:CELE_F10D7.5|protein neuralized [EC:2.3.2.27]	gi|71987160|ref|NP_510819.3|	0	Uncharacterized protein CELE_F10D7.5 [Caenorhabditis elegans]
novel_mir7	NM_001027569.3	-32.5	0.022862	-28.63	165	T02C1.2	GO:0016020,GO:0046872,	K10143|1|3.49e-08|59.3|cmk:103184806|E3 ubiquitin-protein ligase RFWD2 [EC:2.3.2.27]	gi|115532109|ref|NP_001022740.2|	0	Uncharacterized protein CELE_T02C1.2 [Caenorhabditis elegans]
novel_mir7	NM_073078.3	-29.9	0.150278	-26.13	155	pqn-63	-	-	gi|392920001|ref|NP_505479.3|	0	Prion-like-(Q/N-rich)-domain-bearing protein [Caenorhabditis elegans]
novel_mir7	NM_001027219.5	-25.6	0.648552	-46.03	292	rga-1	GO:0005737,GO:0030695,GO:0007165,GO:0043547,	K18470|1|0.0|910|cel:CELE_W02B12.8|Rho GTPase-activating protein 1	gi|71996800|ref|NP_001022390.1|	0	Rho GTPase Activating protein [Caenorhabditis elegans]
novel_mir7	NM_001306545.1	-28.2	0.759759	-60.22	317	sea-2	GO:0005737,GO:0005634,GO:0003725,GO:0003727,GO:0009792,GO:0040034,GO:0007549,GO:0010629,GO:0008340,GO:0009408,	-	gi|922582102|ref|NP_001300483.1|	0	Signal Element on Autosome [Caenorhabditis elegans]
novel_mir7	NM_068332.5	-31.4	0.082845	-27.85	157	C24D10.1	GO:0005634,GO:0004725,GO:0035335,	K18040|1|1.37e-07|60.1|bfo:BRAFLDRAFT_86740|tyrosine-protein phosphatase non-receptor type 23 [EC:3.1.3.48]!K18033|2|1.88e-07|59.3|fca:101082346|receptor-type tyrosine-protein phosphatase epsilon [EC:3.1.3.48]!K05695|3|2.41e-07|58.9|adf:107328515|receptor-type tyrosine-protein phosphatase F [EC:3.1.3.48]	gi|71983030|ref|NP_500733.2|	0	Uncharacterized protein CELE_C24D10.1 [Caenorhabditis elegans]
novel_mir7	NM_001307541.1	-34.5	0.266633	-50.01	311	eel-1	GO:0005737,GO:0005634,GO:0016874,GO:0004842,GO:0005515,GO:0045167,GO:0010468,GO:0031581,GO:0030178,GO:0042770,GO:0043065,GO:0042787,GO:0002119,GO:0009792,	K10592|1|0.0|8630|cel:CELE_Y67D8C.5|E3 ubiquitin-protein ligase HUWE1 [EC:2.3.2.26]	gi|808357888|ref|NP_001294470.1|	0	Enhancer of EfL-1 mutant phenotype [Caenorhabditis elegans]
novel_mir7	NM_058908.6	-34.7	0.000662	-31.76	161	R12E2.14	-	-	gi|17508637|ref|NP_491309.1|	2.77266e-40	Uncharacterized protein CELE_R12E2.14 [Caenorhabditis elegans]
novel_mir7	NM_062290.3	-26.7	0.256168	-26.04	158	F53C3.3	GO:0016021,	K07819|1|6.58e-07|54.7|cbr:CBG09575|beta-1,3-galactosyltransferase 1 [EC:2.4.1.-]	gi|71990143|ref|NP_494691.2|	1.11739e-177	Uncharacterized protein CELE_F53C3.3 [Caenorhabditis elegans]
novel_mir7	NM_062396.4	-30.8	0.121259	-27.45	161	cyp-23A1	GO:0016021,GO:0020037,GO:0016705,GO:0005506,GO:0008395,GO:0055114,GO:0040011,	K17946|1|0.0|1108|cel:CELE_B0304.3|cytochrome P450 family 23 subfamily A!K17955|5|6.64e-97|307|cel:CELE_F42A9.5|cytochrome P450 family 33	gi|17531287|ref|NP_494797.1|	0	CYtochrome P450 family [Caenorhabditis elegans]
novel_mir7	NM_061019.5	-28.6	0.358294	-28.96	160	W04A8.1	GO:0016591,GO:0008420,GO:0070940,GO:0002119,	K19403|1|5.04e-10|68.2|bmy:Bm1_49645|microcephalin	gi|17509553|ref|NP_493420.1|	0	Uncharacterized protein CELE_W04A8.1 [Caenorhabditis elegans]
novel_mir7	NM_001313392.1	-29	0.738812	-65.87	465	fln-2	GO:0040011,GO:0018996,	K04437|1|0.0|4592|cel:CELE_C23F12.1|filamin	gi|922581563|ref|NP_509580.6|	0	FiLamiN (actin binding protein) homolog [Caenorhabditis elegans]
novel_mir7	NM_001313424.1	-32.3	0.171065	-51.05	318	bet-2	-	K11722|1|1.38e-50|200|tup:102470944|bromodomain-containing protein 4!K11724|5|7.92e-49|194|dre:333996|bromodomain testis-specific protein	gi|922581688|ref|NP_001300353.1|	0	BET (two bromodomains) family protein [Caenorhabditis elegans]
novel_mir7	NM_077572.5	-26.2	0.584809	-25.21	159	rsd-3	-	K12471|1|6.57e-46|174|cmk:103177297|epsin	gi|17550802|ref|NP_509973.1|	0	Uncharacterized protein CELE_C34E11.1 [Caenorhabditis elegans]
novel_mir7	NM_074729.4	-28.3	0.300951	-25.1	158	F57G8.5	GO:0016021,GO:0015299,GO:1902600,GO:0018996,GO:0040011,	-	gi|32566724|ref|NP_507130.2|	0	Uncharacterized protein CELE_F57G8.5 [Caenorhabditis elegans]
novel_mir7	NM_077984.4	-25.5	0.73437	-26.33	158	C11H1.3	GO:0031410,GO:0008270,GO:0004842,GO:0008340,GO:1903361,GO:0040027,GO:0040035,GO:0018996,GO:0010171,GO:0016567,GO:0040011,	K10604|1|1.07e-71|243|lcm:102358123|E3 ubiquitin-protein ligase MGRN1 [EC:2.3.2.27]	gi|17550346|ref|NP_510385.1|	0	Uncharacterized protein CELE_C11H1.3 [Caenorhabditis elegans]
novel_mir7	NM_060321.5	-25.6	0.56189	-25.32	150	tag-353	GO:0016021,	K14027|1|2.60e-15|82.0|tgu:100222173|homocysteine-responsive endoplasmic reticulum-resident ubiquitin-like domain member 1 protein	gi|115533732|ref|NP_492722.2|	0	Uncharacterized protein CELE_F25D7.2 [Caenorhabditis elegans]
novel_mir7	NM_064891.3	-30.1	0.048165	-27.53	146	bra-2	GO:0005885,GO:0005634,GO:0042393,GO:0000977,GO:0003712,GO:0046872,GO:0003682,GO:0000122,GO:0034314,	K20289|1|1.20e-14|77.4|smm:Smp_143570|conserved oligomeric Golgi complex subunit 2	gi|17553122|ref|NP_497292.1|	3.93016e-160	BMP Receptor Associated protein family [Caenorhabditis elegans]
novel_mir7	NM_065156.3	-27	0.116985	-25.86	154	E02H9.7	-	-	gi|193205636|ref|NP_497557.2|	1.78323e-92	Uncharacterized protein CELE_E02H9.7 [Caenorhabditis elegans]
novel_mir7	NM_001028023.1	-30.8	0.146567	-29.66	159	cng-3	GO:0016021,GO:0005216,GO:0034220,	K04949|1|4.50e-55|203|csab:103232751|cyclic nucleotide gated channel alpha 2!K04950|2|5.77e-55|203|chx:102180049|cyclic nucleotide gated channel alpha 3!K04948|3|5.83e-55|202|mgp:100542472|cyclic nucleotide gated channel alpha 1	gi|71988286|ref|NP_001023194.1|	0	Cyclic Nucleotide Gated channel [Caenorhabditis elegans]
novel_mir7	NM_171117.4	-31.3	0.50752	-27.1	163	sax-2	GO:0005938,GO:0030427,GO:0043652,GO:0090527,GO:0000902,GO:0031175,GO:0034607,GO:0009792,	-	gi|71984648|ref|NP_741131.2|	0	Sensory AXon guidance [Caenorhabditis elegans]
novel_mir7	NM_060651.5	-26.5	0.712999	-42.97	312	clp-3	-	K08585|1|0.0|815|cel:CELE_Y77E11A.10|calpain, invertebrate [EC:3.4.22.-]	gi|922581807|ref|NP_493052.3|	0	CaLPain family [Caenorhabditis elegans]
novel_mir7	NM_001029547.5	-32.1	0.233654	-30.66	159	mrp-1	GO:0005887,GO:0042626,GO:0005524,GO:0055085,GO:0040024,GO:0097501,GO:0016246,	K05665|1|0.0|3152|cel:CELE_F57C12.5|ATP-binding cassette, subfamily C (CFTR/MRP), member 1	gi|71992066|ref|NP_001024718.1|	0	Uncharacterized protein CELE_F57C12.5 [Caenorhabditis elegans]
novel_mir7	NM_001306454.1	-30.6	0.373387	-25.79	159	itx-1	GO:0016021,GO:0005912,GO:0016323,	K07380|1|3.72e-22|109|acs:100562824|contactin associated protein-like 2	gi|808354967|ref|NP_001293382.1|	0	InTestinal NeureXin-like [Caenorhabditis elegans]
novel_mir7	NM_060324.2	-33.2	0.122549	-30.7	164	F25D7.5	GO:0016021,	-	gi|193202629|ref|NP_492725.2|	0	Uncharacterized protein CELE_F25D7.5 [Caenorhabditis elegans]
novel_mir7	NM_061816.5	-28.1	0.305682	-25.05	161	F54A3.6	-	-	gi|17534319|ref|NP_494217.1|	0	Uncharacterized protein CELE_F54A3.6 [Caenorhabditis elegans]
novel_mir7	NM_058750.6	-26.1	0.576429	-25.16	157	W05F2.6	GO:0002119,GO:0009792,	-	gi|193203331|ref|NP_491151.2|	0	Uncharacterized protein CELE_W05F2.6 [Caenorhabditis elegans]
novel_mir7	NM_062514.3	-28.7	0.332096	-25.31	156	shc-2	-	-	gi|392889899|ref|NP_494915.2|	0	SHC (Src Homology domain C-terminal) adaptor homolog [Caenorhabditis elegans]
novel_mir7	NM_001047583.4	-26.3	0.737352	-26.98	164	eps-8	GO:0030056,GO:0005903,GO:0045177,GO:0051015,GO:0000003,GO:0040027,GO:0006898,GO:0051017,GO:0040026,GO:0048730,GO:0040011,GO:0045185,GO:0009792,GO:0045109,GO:0048546,GO:0030421,GO:0048598,GO:0051016,	K17277|1|0.0|1493|cel:CELE_Y57G11C.24|epidermal growth factor receptor kinase substrate 8	gi|115533056|ref|NP_001041048.1|	0	EPS (human endocytosis) related [Caenorhabditis elegans]
novel_mir7	NR_133630.1	-39	0.003427	-36.11	168	hel-1	-	-	-	-	-
novel_mir7	NM_064413.7	-29.4	0.326915	-28.1	163	mac-1	GO:0005524,	K14571|1|0.0|1653|cel:CELE_Y48C3A.7|ribosome biogenesis ATPase	gi|17537217|ref|NP_496814.1|	0	Member of AAA family binding CED-4 [Caenorhabditis elegans]
novel_mir7	NM_001268194.1	-26.6	0.731825	-25.94	150	T28D6.5	GO:0016021,GO:0009792,GO:0040007,GO:0040035,GO:0002119,	-	gi|392896717|ref|NP_001255123.1|	0	Uncharacterized protein CELE_T28D6.5 [Caenorhabditis elegans]
novel_mir7	NM_170825.3	-28.2	0.365048	-25.91	153	dot-1.1	GO:0005634,GO:0031151,GO:0051726,GO:0034729,	K11427|1|0.0|1092|cel:CELE_Y39G10AR.18|histone-lysine N-methyltransferase, H3 lysine-79 specific [EC:2.1.1.43]	gi|71994302|ref|NP_740809.2|	0	DOT1 histone methyltransferase family [Caenorhabditis elegans]
novel_mir7	NM_069158.2	-31	0.30516	-61.67	321	C53B4.4	GO:0005622,GO:0046872,GO:0035556,	-	gi|392899887|ref|NP_501559.2|	0	Uncharacterized protein CELE_C53B4.4 [Caenorhabditis elegans]
novel_mir7	NM_061151.3	-32.7	0.054923	-27.63	168	npp-4	GO:0044613,GO:0017056,GO:0005487,GO:0005543,GO:0005515,GO:0006606,GO:0040035,GO:0006405,GO:0006997,GO:0071426,GO:0006898,GO:0009792,GO:0000132,	K14307|1|2.85e-137|411|cbr:CBG19751|nucleoporin p58/p45!K14306|3|1.27e-12|75.9|cel:CELE_F53F10.5|nuclear pore complex protein Nup62	gi|17510275|ref|NP_493552.1|	0	Nuclear Pore complex Protein [Caenorhabditis elegans]
novel_mir7	NM_001307250.1	-28.4	0.65012	-45.46	305	Y40C5A.3	-	-	gi|808357302|ref|NP_001294179.1|	0	Uncharacterized protein CELE_Y40C5A.3 [Caenorhabditis elegans]
novel_mir7	NM_060792.1	-25.9	0.533081	-25.07	146	ntr-1	GO:0016021,GO:0004930,GO:0007186,	K04228|1|3.41e-38|145|phi:102104327|arginine vasopressin receptor 2	gi|17508933|ref|NP_493193.1|	0	NemaTocin Receptor [Caenorhabditis elegans]
novel_mir7	NM_076747.4	-28.2	0.208438	-27.12	157	F41B4.1	GO:0005515,	-	gi|25151818|ref|NP_509148.2|	0	Uncharacterized protein CELE_F41B4.1 [Caenorhabditis elegans]
novel_mir7	NM_062801.4	-27.2	0.628611	-245.75	1470	ZK84.1	-	-	gi|17537803|ref|NP_495202.1|	0	Uncharacterized protein CELE_ZK84.1 [Caenorhabditis elegans]
novel_mir7	NM_075468.4	-29	0.391738	-33.97	169	unc-51	GO:0043025,GO:0030424,GO:0005515,GO:0004674,GO:0005524,GO:0007411,GO:0008340,GO:0012501,GO:0070265,GO:0046777,GO:0009792,GO:0032880,GO:0045138,GO:0030163,GO:0006914,GO:0043277,GO:0040024,GO:0030516,GO:0040014,GO:0016477,	K08269|1|0.0|1771|cel:CELE_Y60A3A.1|serine/threonine-protein kinase ULK/ATG1 [EC:2.7.11.1]	gi|17564910|ref|NP_507869.1|	0	Serine/threonine-protein kinase unc-51 [Caenorhabditis elegans]
novel_mir7	NM_069367.4	-33.5	0.015599	-30.52	161	ssq-1	GO:0040011,	-	gi|17542094|ref|NP_501768.1|	2.0191e-166	Sperm-Specific family, class Q [Caenorhabditis elegans]
novel_mir7	NM_001270170.1	-27.8	0.273969	-26.57	149	cut-5	GO:0016021,GO:0010171,	K04499|1|2.78e-36|145|tsp:Tsp_09265|RuvB-like protein 1 (pontin 52)!K14536|2|5.31e-11|69.7|tsp:Tsp_08007|ribosome assembly protein 1 [EC:3.6.5.-]	gi|392927059|ref|NP_001257099.1|	0	CUTiclin [Caenorhabditis elegans]
novel_mir7	NM_060172.4	-28.2	0.539143	-25.06	151	C04F12.1	GO:0003676,GO:0006952,GO:0016246,	K11593|1|5.39e-65|241|loa:LOAG_01336|eukaryotic translation initiation factor 2C	gi|17505468|ref|NP_492573.1|	0	Uncharacterized protein CELE_C04F12.1 [Caenorhabditis elegans]
novel_mir7	NM_001313090.1	-29	0.545745	-46.31	297	egl-8	GO:0005622,GO:0030424,GO:0005912,GO:0005886,GO:0045202,GO:0043204,GO:0004871,GO:0004435,GO:0005509,GO:0008340,GO:0043052,GO:0016246,GO:0016042,GO:0007320,GO:0034609,GO:0040017,GO:0035418,GO:0043051,GO:0007212,GO:0046662,GO:0009792,GO:0014057,GO:0006935,GO:0030163,GO:0035556,	K05858|1|0.0|1618|loa:LOAG_00068|phosphatidylinositol phospholipase C, beta [EC:3.1.4.11]	gi|922580898|ref|NP_001300019.1|	0	Phosphoinositide phospholipase C [Caenorhabditis elegans]
novel_mir7	NM_072247.4	-30.7	0.185822	-28.48	155	cpt-6	GO:0016746,GO:0008152,GO:0019915,	K08765|1|0.0|564|loa:LOAG_00723|carnitine O-palmitoyltransferase 1, liver isoform [EC:2.3.1.21]	gi|17564952|ref|NP_504648.1|	0	Carnitine Palmitoyl Transferase [Caenorhabditis elegans]
novel_mir7	NM_001026273.5	-35.2	0.039302	-27.61	164	dlk-1	GO:0005929,GO:0005737,GO:0030425,GO:0043025,GO:0030424,GO:0030054,GO:0045202,GO:0008022,GO:0046872,GO:0031625,GO:0004709,GO:0005524,GO:0000186,GO:0046777,GO:0045773,GO:0048677,GO:0050807,GO:0002119,GO:1903616,GO:0048689,	K04422|1|0.0|1932|cel:CELE_F33E2.2|mitogen-activated protein kinase kinase kinase 13 [EC:2.7.11.25]!K04423|2|0.0|1416|cbr:CBG08707|mitogen-activated protein kinase kinase kinase 12 [EC:2.7.11.25]	gi|71985422|ref|NP_001021444.1|	0	Mitogen-activated protein kinase kinase kinase dlk-1 [Caenorhabditis elegans]
novel_mir7	NM_001307255.1	-29.4	0.700123	-45.46	305	Y40C5A.3	-	-	gi|808357312|ref|NP_001294184.1|	0	Uncharacterized protein CELE_Y40C5A.3 [Caenorhabditis elegans]
novel_mir7	NM_181976.3	-34.7	0.007154	-30.33	165	gsto-2	GO:0005737,GO:0004364,GO:0050610,GO:0045174,GO:0098869,GO:0006749,GO:0055114,	K00799|1|0.0|520|cel:CELE_C02D5.3|glutathione S-transferase [EC:2.5.1.18]	gi|392895835|ref|NP_871705.3|	0	Probable glutathione transferase omega-2 [Caenorhabditis elegans]
novel_mir7	NM_060136.1	-29.9	0.093694	-27.23	165	C36F7.5	GO:0016021,	-	gi|17505923|ref|NP_492537.1|	0	Uncharacterized protein CELE_C36F7.5 [Caenorhabditis elegans]
novel_mir7	NM_063764.6	-28.7	0.569858	-40.36	290	lec-2	GO:0005886,GO:0045121,GO:0030246,	K10093|1|1.15e-69|240|tsp:Tsp_07367|galectin-9!K10091|4|1.34e-41|160|cmy:102933362|galectin-4	gi|71990071|ref|NP_496165.3|	0	gaLECtin [Caenorhabditis elegans]
novel_mir7	NM_071823.4	-30.4	0.018623	-55.11	321	Y47D7A.11	-	-	gi|72001239|ref|NP_504224.2|	1.09133e-84	Uncharacterized protein CELE_Y47D7A.11 [Caenorhabditis elegans]
novel_mir7	NM_001306541.1	-30.6	0.069235	-29.39	160	hsp-4	GO:0034663,GO:0005788,GO:0005791,GO:0001085,GO:0005524,GO:0006915,GO:0000003,GO:0019915,GO:0002119,GO:0030968,GO:0009792,	K09490|1|0.0|659|cel:CELE_F43E2.8|heat shock 70kDa protein 5	gi|17534771|ref|NP_495536.1|	0	Heat shock 70 kDa protein D [Caenorhabditis elegans]
novel_mir7	NM_001136347.2	-27.1	0.742607	-45	310	ifg-1	GO:0016281,GO:0005829,GO:0003743,GO:0006413,GO:0008340,GO:0006915,GO:0009408,GO:0010171,GO:0019915,GO:0002119,GO:0007281,GO:0009792,GO:0008406,GO:0040018,	K03260|1|0.0|2144|cel:CELE_M110.4|translation initiation factor 4G	gi|212645481|ref|NP_001129819.1|	0	Initiation Factor 4G (eIF4G) family [Caenorhabditis elegans]
novel_mir7	NM_171903.3	-25.6	0.710551	-49.46	320	pqn-75	-	-	gi|25152832|ref|NP_741365.1|	0	Prion-like-(Q/N-rich)-domain-bearing protein [Caenorhabditis elegans]
novel_mir7	NM_063586.1	-26.8	0.241097	-25.74	150	D2013.6	GO:0005515,GO:0000003,GO:0006898,	-	gi|17532681|ref|NP_495987.1|	8.08804e-173	Uncharacterized protein CELE_D2013.6 [Caenorhabditis elegans]
novel_mir7	NM_001313642.1	-28.2	0.709131	-60.22	317	sea-2	GO:0005737,GO:0005634,GO:0003725,GO:0003727,GO:0009792,GO:0040034,GO:0007549,GO:0010629,GO:0008340,GO:0009408,	-	gi|922582102|ref|NP_001300483.1|	0	Signal Element on Autosome [Caenorhabditis elegans]
novel_mir7	NM_076261.4	-29.1	0.735153	-42.55	294	F35A5.1	GO:0005883,GO:0061564,	-	gi|453232791|ref|NP_508662.4|	0	Uncharacterized protein CELE_F35A5.1 [Caenorhabditis elegans]
novel_mir7	NM_001268502.1	-28	0.663017	-25.46	156	catp-6	GO:0005764,GO:0005774,GO:0005887,GO:0046872,GO:0019829,GO:0005524,GO:0098655,GO:0006457,GO:0006874,GO:0008152,	K14951|1|0.0|2494|cel:CELE_W08D2.5|cation-transporting ATPase 13A3/4/5 [EC:3.6.3.-]	gi|392900202|ref|NP_001255430.1|	0	Probable cation-transporting ATPase W08D2.5 [Caenorhabditis elegans]
novel_mir7	NM_001028772.2	-32.6	0.019513	-58	310	F47B8.13	-	-	gi|392921809|ref|NP_001023943.2|	7.74764e-154	Uncharacterized protein CELE_F47B8.13 [Caenorhabditis elegans]
novel_mir7	NM_001029086.2	-34.8	0.034243	-31.89	169	Y51A2B.6	-	-	gi|193209123|ref|NP_001024257.2|	0	Uncharacterized protein CELE_Y51A2B.6 [Caenorhabditis elegans]
novel_mir7	NM_181996.3	-29	0.109512	-25.27	153	nuo-2	GO:0005747,GO:0003723,GO:0008137,GO:0008340,GO:0055114,GO:0002119,GO:0006898,GO:0009792,	K03936|1|0.0|560|cel:CELE_T10E9.7|NADH dehydrogenase (ubiquinone) Fe-S protein 3 [EC:1.6.5.3 1.6.99.3]	gi|71990788|ref|NP_491881.2|	0	NADH Ubiquinone Oxidoreductase [Caenorhabditis elegans]
novel_mir7	NM_058544.4	-33.4	0.129866	-31.1	161	W03F11.4	-	K02374|1|4.58e-21|106|mze:101487159|tyrosine-protein phosphatase non-receptor type 13	gi|808354461|ref|NP_490945.2|	0	Protein-tyrosine-phosphatase [Caenorhabditis elegans]
novel_mir7	NM_067797.4	-29.3	0.053537	-27.49	162	trap-3	GO:0005622,GO:0016021,GO:0006614,	K13251|1|9.96e-128|360|cel:CELE_Y38F2AR.2|translocon-associated protein subunit gamma	gi|17543180|ref|NP_500198.1|	8.28948e-127	TRanslocon-Associated Protein [Caenorhabditis elegans]
novel_mir7	NM_076735.5	-30.7	0.054209	-59.87	346	mdl-1	GO:0005667,GO:0043565,GO:0046982,GO:0009792,GO:0008340,GO:0045595,	K09114|1|3.09e-19|89.7|bmy:Bm1_31000|MAX dimerization protein	gi|17569047|ref|NP_509136.1|	0	MAD-Like [Caenorhabditis elegans]
novel_mir7	NM_064162.4	-28	0.153294	-51.45	315	tpi-1	GO:0005829,GO:0030016,GO:0004807,GO:0008340,GO:0006098,GO:0006094,GO:0045454,GO:0006096,GO:0019563,GO:0046166,GO:0071688,	K01803|1|0.0|502|cel:CELE_Y17G7B.7|triosephosphate isomerase (TIM) [EC:5.3.1.1]	gi|17536593|ref|NP_496563.1|	0	Triosephosphate isomerase [Caenorhabditis elegans]
novel_mir7	NM_001270012.1	-30.5	0.64423	-97.89	501	mlt-11	GO:0004867,GO:0009792,GO:0002119,GO:0010951,GO:0018996,GO:0040011,	K03909|1|1.24e-32|133|acs:103280186|tissue factor pathway inhibitor	gi|392923275|ref|NP_001256941.1|	0	Uncharacterized protein CELE_W01F3.3 [Caenorhabditis elegans]
novel_mir7	NM_001028351.3	-26.3	0.697055	-26.98	164	eps-8	GO:0030056,GO:0005903,GO:0045177,GO:0051015,GO:0000003,GO:0040027,GO:0006898,GO:0051017,GO:0040026,GO:0048730,GO:0040011,GO:0045185,GO:0009792,GO:0045109,GO:0048546,GO:0030421,GO:0048598,GO:0051016,	K17277|1|0.0|1365|cel:CELE_Y57G11C.24|epidermal growth factor receptor kinase substrate 8	gi|115532134|ref|NP_001023521.2|	0	EPS (human endocytosis) related [Caenorhabditis elegans]
novel_mir7	NM_071422.2	-32.8	0.029132	-29.21	158	K12D9.1	GO:0005737,GO:0008757,GO:0032259,	-	gi|943463028|ref|NP_503823.2|	0	Uncharacterized protein CELE_K12D9.1 [Caenorhabditis elegans]
novel_mir7	NM_001268227.1	-34.5	0.126387	-31.99	166	Y79H2A.3	GO:0006898,GO:0002119,GO:0040011,	-	gi|392896884|ref|NP_001255156.1|	0	Uncharacterized protein CELE_Y79H2A.3 [Caenorhabditis elegans]
novel_mir7	NM_001307000.1	-26.3	0.793943	-26.98	164	eps-8	GO:0030056,GO:0005903,GO:0045177,GO:0051015,GO:0000003,GO:0040027,GO:0006898,GO:0051017,GO:0040026,GO:0048730,GO:0040011,GO:0045185,GO:0009792,GO:0045109,GO:0048546,GO:0030421,GO:0048598,GO:0051016,	K17277|1|0.0|1803|cel:CELE_Y57G11C.24|epidermal growth factor receptor kinase substrate 8	gi|808356802|ref|NP_001293929.1|	0	EPS (human endocytosis) related [Caenorhabditis elegans]
novel_mir7	NM_064653.3	-26.5	0.731811	-49.91	301	glna-1	GO:0005759,GO:0004359,GO:0006537,GO:0006543,	K01425|1|0.0|1632|cel:CELE_C09F9.3|glutaminase [EC:3.5.1.2]	gi|193204073|ref|NP_497054.2|	0	GLutamiNAse [Caenorhabditis elegans]
novel_mir7	NM_001307251.1	-28.4	0.662614	-45.46	305	Y40C5A.3	-	-	gi|808357304|ref|NP_001294180.1|	0	Uncharacterized protein CELE_Y40C5A.3 [Caenorhabditis elegans]
novel_mir7	NM_063774.6	-29.7	0.233221	-50.69	320	die-1	GO:0046872,	-	gi|17532737|ref|NP_496175.1|	0	Dorsal Intercalation and Elongation defect [Caenorhabditis elegans]
novel_mir7	NM_001270171.1	-27.8	0.286198	-26.57	149	cut-5	GO:0016021,GO:0010171,	K04499|1|4.83e-33|136|tsp:Tsp_09265|RuvB-like protein 1 (pontin 52)!K14536|2|4.43e-09|63.9|tsp:Tsp_08007|ribosome assembly protein 1 [EC:3.6.5.-]	gi|392927061|ref|NP_001257100.1|	0	CUTiclin [Caenorhabditis elegans]
novel_mir7	NM_064097.4	-27.1	0.703354	-25.32	151	xpf-1	-	K10848|1|0.0|1922|cel:CELE_C47D12.8|DNA excision repair protein ERCC-4 [EC:3.1.-.-]	gi|17532461|ref|NP_496498.1|	0	(Xeroderma Pigmentosum group F) DNA repair gene homolog [Caenorhabditis elegans]
novel_mir7	NM_001330953.1	-32.6	0.054769	-26.54	162	irld-47	-	-	gi|17535973|ref|NP_495643.1|	0	Insulin/EGF-Receptor L Domain protein [Caenorhabditis elegans]
novel_mir7	NM_001313099.1	-29	0.563682	-46.31	297	egl-8	GO:0005622,GO:0030424,GO:0005912,GO:0005886,GO:0045202,GO:0043204,GO:0004871,GO:0004435,GO:0005509,GO:0008340,GO:0043052,GO:0016246,GO:0016042,GO:0007320,GO:0034609,GO:0040017,GO:0035418,GO:0043051,GO:0007212,GO:0046662,GO:0009792,GO:0014057,GO:0006935,GO:0030163,GO:0035556,	K05858|1|0.0|2258|cbr:CBG06373|phosphatidylinositol phospholipase C, beta [EC:3.1.4.11]	gi|922580916|ref|NP_001300028.1|	0	Phosphoinositide phospholipase C [Caenorhabditis elegans]
novel_mir7	NM_069551.4	-32.5	0.066657	-26.82	149	zim-2	GO:0000794,GO:0048856,	-	gi|17542270|ref|NP_501952.1|	0	Zinc finger In Meiosis [Caenorhabditis elegans]
novel_mir7	NM_001268501.1	-28	0.677803	-25.46	156	catp-6	GO:0005764,GO:0005774,GO:0005887,GO:0046872,GO:0019829,GO:0005524,GO:0098655,GO:0006457,GO:0006874,GO:0008152,	K14951|1|0.0|2597|cel:CELE_W08D2.5|cation-transporting ATPase 13A3/4/5 [EC:3.6.3.-]	gi|392900202|ref|NP_001255430.1|	0	Probable cation-transporting ATPase W08D2.5 [Caenorhabditis elegans]
novel_mir7	NM_076856.4	-31.8	0.027716	-26.87	160	clc-2	GO:0016021,GO:0005923,GO:0005886,GO:0005247,GO:0005198,GO:0090136,GO:0000003,GO:1903959,GO:0006821,GO:0009792,	-	gi|17550016|ref|NP_509257.1|	0	Clc-like protein 2 [Caenorhabditis elegans]
novel_mir7	NM_062245.2	-27.4	0.780607	-30.46	145	T24E12.10	-	-	gi|392889638|ref|NP_494646.2|	0	Uncharacterized protein CELE_T24E12.10 [Caenorhabditis elegans]
novel_mir7	NM_001026687.3	-34.4	0.223987	-29.44	157	vab-10	GO:0030056,GO:0009925,GO:0005882,GO:0016324,GO:0051015,GO:0040007,GO:0006898,GO:0048730,GO:0007050,GO:0040039,GO:0009792,GO:0002119,GO:0030163,GO:0010171,GO:0071688,GO:0040035,GO:0032940,	K10382|1|0.0|1571|tsp:Tsp_07976|dystonin	gi|71997225|ref|NP_001021858.1|	0	Uncharacterized protein CELE_ZK1151.1 [Caenorhabditis elegans]
novel_mir7	NM_076218.4	-25.3	0.433725	-26.81	158	C18B2.3	-	-	gi|17550540|ref|NP_508619.1|	1.78307e-172	Uncharacterized protein CELE_C18B2.3 [Caenorhabditis elegans]
novel_mir7	NM_001313592.1	-28.5	0.509477	-52.6	324	dsh-1	GO:0005829,GO:0005109,GO:0030971,GO:0035556,GO:0060071,GO:0060069,GO:0010171,GO:0002119,GO:0060070,GO:0009792,	K02353|1|0.0|1001|cel:CELE_C34F11.9|segment polarity protein dishevelled	gi|922582178|ref|NP_001300521.1|	0	DiSHevelled related [Caenorhabditis elegans]
novel_mir7	NM_001322626.1	-27.9	0.658615	-46.1	302	utx-1	-	K11447|1|0.0|2409|cel:CELE_D2021.1|histone demethylase [EC:1.14.11.-]	gi|17551312|ref|NP_509450.1|	0	human UTX (Ubiquitously transcribed TPR on X) homolog [Caenorhabditis elegans]
novel_mir7	NM_076785.4	-30.5	0.068133	-28.89	163	cah-5	GO:0016021,GO:0005576,GO:0008270,GO:0004089,GO:0006730,	K01674|1|0.0|646|cel:CELE_R173.1|carbonic anhydrase [EC:4.2.1.1]!K01672|2|1.50e-64|207|bmy:Bm1_34100|carbonic anhydrase [EC:4.2.1.1]	gi|71995280|ref|NP_509186.3|	0	Putative carbonic anhydrase 5 [Caenorhabditis elegans]
novel_mir7	NM_064427.4	-34.6	0.01839	-29.32	164	Y48E1C.1	GO:0071821,	-	gi|17537273|ref|NP_496828.1|	0	Uncharacterized protein CELE_Y48E1C.1 [Caenorhabditis elegans]
novel_mir7	NM_068840.4	-31.6	0.025735	-25.63	155	plp-1	GO:0043186,GO:0005634,GO:0003691,GO:0009792,GO:0007281,GO:0040012,	K13696|1|1.03e-07|56.6|hro:HELRODRAFT_182167|abhydrolase domain-containing protein 1/3	gi|17541718|ref|NP_501241.1|	2.02236e-166	Pur alpha Like Protein [Caenorhabditis elegans]
novel_mir7	NM_001307257.1	-28.4	0.678314	-45.46	305	Y40C5A.3	-	-	gi|808357316|ref|NP_001294186.1|	0	Uncharacterized protein CELE_Y40C5A.3 [Caenorhabditis elegans]
novel_mir7	NM_001038418.3	-33.8	0.007447	-27.97	153	W03F9.11	-	-	gi|922580672|ref|NP_001033507.3|	7.05714e-145	Uncharacterized protein CELE_W03F9.11 [Caenorhabditis elegans]
novel_mir7	NM_076075.4	-34.8	0.008082	-31.93	168	T14G11.1	GO:0016021,	-	gi|115534959|ref|NP_508476.2|	0	Uncharacterized protein CELE_T14G11.1 [Caenorhabditis elegans]
novel_mir7	NM_059834.3	-28.6	0.131357	-43.46	298	T02E1.7	GO:0016021,	K20369|1|3.64e-48|165|cel:CELE_C54H2.5|ER-derived vesicles protein	gi|17508799|ref|NP_492235.1|	0	Uncharacterized protein CELE_T02E1.7 [Caenorhabditis elegans]
novel_mir7	NM_001026682.2	-34.4	0.231043	-29.44	157	vab-10	GO:0030056,GO:0009925,GO:0005882,GO:0016324,GO:0051015,GO:0040007,GO:0006898,GO:0048730,GO:0007050,GO:0040039,GO:0009792,GO:0002119,GO:0030163,GO:0010171,GO:0071688,GO:0040035,GO:0032940,	K10382|1|0.0|1426|tsp:Tsp_07976|dystonin	gi|71997197|ref|NP_001021853.1|	0	Uncharacterized protein CELE_ZK1151.1 [Caenorhabditis elegans]
novel_mir7	NM_067911.1	-29	0.081106	-26.29	156	W08E12.6	-	-	gi|17542838|ref|NP_500312.1|	1.21606e-132	Uncharacterized protein CELE_W08E12.6 [Caenorhabditis elegans]
novel_mir7	NM_171448.5	-27.3	0.379281	-49.86	310	Y47D7A.15	-	-	gi|808358554|ref|NP_741525.3|	0	Uncharacterized protein CELE_Y47D7A.15 [Caenorhabditis elegans]
novel_mir7	NM_001307249.1	-28.4	0.585817	-45.46	305	Y40C5A.3	-	-	gi|808357300|ref|NP_001294178.1|	0	Uncharacterized protein CELE_Y40C5A.3 [Caenorhabditis elegans]
novel_mir7	NM_001267520.1	-26.5	0.753964	-49.91	301	glna-1	GO:0005759,GO:0004359,GO:0006537,GO:0006543,	K01425|1|0.0|1740|cel:CELE_C09F9.3|glutaminase [EC:3.5.1.2]	gi|392892577|ref|NP_001254449.1|	0	GLutamiNAse [Caenorhabditis elegans]
novel_mir7	NM_069971.6	-27.1	0.27951	-43.17	285	col-130	GO:0016021,GO:0005581,GO:0042302,	K06236|1|2.00e-12|72.8|cge:100759814|collagen, type I, alpha	gi|17539720|ref|NP_502372.1|	0	COLlagen [Caenorhabditis elegans]
novel_mir7	NM_001306653.1	-26.5	0.760209	-49.91	301	glna-1	GO:0005759,GO:0004359,GO:0006537,GO:0006543,	K01425|1|0.0|1796|cel:CELE_C09F9.3|glutaminase [EC:3.5.1.2]	gi|808355520|ref|NP_001293582.1|	0	GLutamiNAse [Caenorhabditis elegans]
novel_mir7	NM_001269095.1	-32.2	0.050605	-30.22	161	C17B7.8	GO:0008237,GO:0006508,	-	gi|392918614|ref|NP_001256023.1|	0	Uncharacterized protein CELE_C17B7.8 [Caenorhabditis elegans]
novel_mir7	NM_001276804.1	-27.9	0.640356	-50.57	316	pod-1	GO:0051285,GO:0032154,GO:0051015,GO:0009792,GO:0008340,GO:0006915,GO:0048477,	K18619|1|0.0|2140|cel:CELE_Y76A2B.1|coronin-7	gi|453232060|ref|NP_001263733.1|	0	Uncharacterized protein CELE_Y76A2B.1 [Caenorhabditis elegans]
novel_mir7	NM_067489.4	-34.1	0.011148	-30.85	171	pqbp-1.1	GO:0016604,GO:0006641,GO:0019915,	K12865|1|0.0|583|cel:CELE_T21D12.3|polyglutamine-binding protein 1	gi|25148159|ref|NP_499890.2|	0	PQBP1 (polyglutamine tract-binding neurodegeneration protein) homolog [Caenorhabditis elegans]
novel_mir7	NM_078417.5	-27.8	0.436743	-59.14	313	F10D7.5	GO:0008270,GO:0009792,GO:0000003,	K01931|1|0.0|1273|cel:CELE_F10D7.5|protein neuralized [EC:2.3.2.27]	gi|71987137|ref|NP_510818.3|	0	Uncharacterized protein CELE_F10D7.5 [Caenorhabditis elegans]
novel_mir7	NM_001348625.1	-32.8	0.381309	-27.99	168	vab-10	GO:0030056,GO:0009925,GO:0005882,GO:0016324,GO:0051015,GO:0040007,GO:0006898,GO:0048730,GO:0007050,GO:0040039,GO:0009792,GO:0002119,GO:0030163,GO:0010171,GO:0071688,GO:0040035,GO:0032940,	K10382|1|0.0|988|dme:Dmel_CG18076|dystonin	gi|7510925|pir||T26963	0	hypothetical protein ZK1151.2a - Caenorhabditis elegans
novel_mir7	NM_001026685.1	-34.4	0.229127	-29.44	157	vab-10	GO:0030056,GO:0009925,GO:0005882,GO:0016324,GO:0051015,GO:0040007,GO:0006898,GO:0048730,GO:0007050,GO:0040039,GO:0009792,GO:0002119,GO:0030163,GO:0010171,GO:0071688,GO:0040035,GO:0032940,	K10382|1|0.0|1426|tsp:Tsp_07976|dystonin	gi|71997215|ref|NP_001021856.1|	0	Uncharacterized protein CELE_ZK1151.1 [Caenorhabditis elegans]
novel_mir7	NM_077643.4	-32.5	0.194604	-54.83	317	E01G6.1	GO:0005576,GO:0004867,GO:0008061,GO:0010951,GO:0006030,	K03909|1|8.84e-19|93.6|oas:101120391|tissue factor pathway inhibitor	gi|193209732|ref|NP_510044.2|	0	Uncharacterized protein CELE_E01G6.1 [Caenorhabditis elegans]
novel_mir7	NM_001047355.3	-26.3	0.460273	-25.44	155	cdc-37	GO:0072686,GO:0000793,GO:0005737,GO:0031072,GO:0051087,GO:0019901,GO:0051082,GO:0006457,GO:0040035,GO:0051301,GO:0050821,GO:0010171,GO:0002119,GO:0040011,GO:0006898,GO:0009792,	K09554|1|0.0|754|cel:CELE_W08F4.8|cell division cycle protein 37	gi|115532610|ref|NP_001040820.1|	0	Probable Hsp90 co-chaperone cdc37 [Caenorhabditis elegans]
novel_mir7	NM_001330906.1	-28.9	0.627656	-25.02	155	ajm-1	GO:0043296,GO:0016021,GO:0005913,GO:0044292,GO:0016327,GO:0008092,GO:0045216,GO:0040027,GO:0040011,GO:0009792,GO:0008406,	K00476|1|8.54e-20|102|xma:102218642|aspartate beta-hydroxylase [EC:1.14.11.16]	gi|17568589|ref|NP_509537.1|	0	Apical Junction Molecule [Caenorhabditis elegans]
novel_mir7	NM_001313105.1	-29	0.523554	-46.31	297	egl-8	GO:0005622,GO:0030424,GO:0005912,GO:0005886,GO:0045202,GO:0043204,GO:0004871,GO:0004435,GO:0005509,GO:0008340,GO:0043052,GO:0016246,GO:0016042,GO:0007320,GO:0034609,GO:0040017,GO:0035418,GO:0043051,GO:0007212,GO:0046662,GO:0009792,GO:0014057,GO:0006935,GO:0030163,GO:0035556,	K05858|1|0.0|1448|cel:CELE_B0348.4|phosphatidylinositol phospholipase C, beta [EC:3.1.4.11]	gi|922580928|ref|NP_001300034.1|	0	Phosphoinositide phospholipase C [Caenorhabditis elegans]
novel_mir7	NM_073179.4	-27.9	0.17796	-25.11	154	F57A8.1	-	-	gi|71996258|ref|NP_505580.2|	0	Uncharacterized protein CELE_F57A8.1 [Caenorhabditis elegans]
novel_mir7	NM_073604.5	-28.4	0.251664	-27.1	155	rpt-1	GO:0031597,GO:0008540,GO:0031595,GO:0017025,GO:0036402,GO:0005524,GO:0045899,GO:0008340,GO:0000003,GO:0009792,GO:0002119,GO:1901800,GO:0030433,	K03061|1|0.0|895|cel:CELE_C52E4.4|26S proteasome regulatory subunit T1	gi|17563248|ref|NP_506005.1|	0	26S protease regulatory subunit 7 [Caenorhabditis elegans]
novel_mir7	NM_077369.4	-32.3	0.171065	-51.05	318	bet-2	-	K11722|1|2.59e-51|202|tup:102470944|bromodomain-containing protein 4!K08871|5|1.49e-49|194|pbi:103052955|bromodomain-containing protein 2	gi|25152243|ref|NP_509770.2|	0	BET (two bromodomains) family protein [Caenorhabditis elegans]
novel_mir7	NM_058831.4	-26.2	0.781787	-47.19	290	npp-11	GO:0044613,GO:0017056,GO:0005487,GO:0005543,GO:0005515,GO:0006606,GO:0040035,GO:0006405,GO:0002119,GO:0006997,GO:0071426,GO:0006898,GO:0009792,GO:0000132,	K14306|1|0.0|1498|cel:CELE_F53F10.5|nuclear pore complex protein Nup62!K15293|4|4.53e-18|95.5|sasa:106565090|protein unc-13 A/B/C	gi|17507541|ref|NP_491232.1|	0	Nuclear Pore complex Protein [Caenorhabditis elegans]
novel_mir7	NR_071278.1	-31.5	0.003049	-27.48	165	T07H6.7	-	-	-	-	-
novel_mir7	NM_001025819.1	-31.6	0.766224	-48.62	295	unc-89	GO:0031430,GO:0004672,GO:0019902,GO:0017048,GO:0005089,GO:0005524,GO:0035023,GO:0040011,GO:0006468,GO:0010171,GO:0030241,GO:0043547,	K12567|1|0.0|1273|adf:107339449|titin [EC:2.7.11.1]	gi|71980604|ref|NP_001020990.1|	0	Muscle M-line assembly protein unc-89 [Caenorhabditis elegans]
novel_mir7	NM_001270276.1	-28.7	0.054167	-26.97	150	pqn-18	-	-	gi|392927660|ref|NP_001257205.1|	2.64525e-104	Prion-like-(Q/N-rich)-domain-bearing protein [Caenorhabditis elegans]
novel_mir7	NM_059965.1	-29.5	0.262518	-58.67	323	C36B1.9	GO:0008270,	-	gi|17505905|ref|NP_492366.1|	0	Uncharacterized protein CELE_C36B1.9 [Caenorhabditis elegans]
novel_mir7	NM_001269094.1	-32.2	0.064024	-30.22	161	C17B7.8	GO:0008237,GO:0006508,	-	gi|392918614|ref|NP_001256023.1|	0	Uncharacterized protein CELE_C17B7.8 [Caenorhabditis elegans]
novel_mir7	NM_067057.4	-26.6	0.679818	-25.94	150	T28D6.5	GO:0016021,GO:0009792,GO:0040007,GO:0040035,GO:0002119,	-	gi|392896723|ref|NP_499458.3|	0	Uncharacterized protein CELE_T28D6.5 [Caenorhabditis elegans]
novel_mir7	NM_001313403.1	-29.2	0.676468	-65.87	465	fln-2	GO:0040011,GO:0018996,	K04437|1|0.0|2586|cel:CELE_C23F12.1|filamin	gi|922581622|ref|NP_001300320.1|	0	FiLamiN (actin binding protein) homolog [Caenorhabditis elegans]
novel_mir7	NM_001307262.1	-28.4	0.661571	-45.46	305	Y40C5A.3	-	-	gi|808357326|ref|NP_001294191.1|	0	Uncharacterized protein CELE_Y40C5A.3 [Caenorhabditis elegans]
novel_mir7	NM_001029522.3	-26.4	0.770065	-27.36	159	F49E2.5	GO:0002119,	-	gi|71991080|ref|NP_001024693.1|	0	Uncharacterized protein CELE_F49E2.5 [Caenorhabditis elegans]
novel_mir7	NM_001307506.1	-27.9	0.369012	-50.42	312	ZK180.6	-	-	gi|193207011|ref|NP_500584.2|	0	Uncharacterized protein CELE_ZK180.6 [Caenorhabditis elegans]
novel_mir7	NM_060477.4	-33.2	0.050092	-39.96	177	rsy-1	-	K13170|1|0.0|1181|cel:CELE_Y53H1A.1|splicing factor, arginine/serine-rich 18	gi|212645159|ref|NP_492878.2|	0	Regulator of SYnapse formation [Caenorhabditis elegans]
novel_mir7	NM_001029548.4	-32.1	0.234551	-30.66	159	mrp-1	GO:0005887,GO:0042626,GO:0005524,GO:0055085,GO:0040024,GO:0097501,GO:0016246,	K05665|1|0.0|3147|cel:CELE_F57C12.5|ATP-binding cassette, subfamily C (CFTR/MRP), member 1	gi|922581533|ref|NP_001024719.2|	0	Uncharacterized protein CELE_F57C12.5 [Caenorhabditis elegans]
novel_mir7	NM_001026176.2	-29	0.577768	-46.31	297	egl-8	GO:0005622,GO:0030424,GO:0005912,GO:0005886,GO:0045202,GO:0043204,GO:0004871,GO:0004435,GO:0005509,GO:0008340,GO:0043052,GO:0016246,GO:0016042,GO:0007320,GO:0034609,GO:0040017,GO:0035418,GO:0043051,GO:0007212,GO:0046662,GO:0009792,GO:0014057,GO:0006935,GO:0030163,GO:0035556,	K05858|1|0.0|2641|cbr:CBG06373|phosphatidylinositol phospholipase C, beta [EC:3.1.4.11]	gi|71981793|ref|NP_001021347.1|	0	1-phosphatidylinositol 4,5-bisphosphate phosphodiesterase beta egl-8 [Caenorhabditis elegans]
novel_mir7	NM_001348620.1	-32.8	0.485452	-27.99	168	vab-10	GO:0030056,GO:0009925,GO:0005882,GO:0016324,GO:0051015,GO:0040007,GO:0006898,GO:0048730,GO:0007050,GO:0040039,GO:0009792,GO:0002119,GO:0030163,GO:0010171,GO:0071688,GO:0040035,GO:0032940,	K10382|1|0.0|1006|dme:Dmel_CG18076|dystonin	gi|71997204|ref|NP_001021854.1|	0	Uncharacterized protein CELE_ZK1151.1 [Caenorhabditis elegans]
novel_mir7	NM_171311.3	-25.6	0.715037	-49.46	320	pqn-75	-	-	gi|25152832|ref|NP_741365.1|	0	Prion-like-(Q/N-rich)-domain-bearing protein [Caenorhabditis elegans]
novel_mir7	NM_069035.3	-28.3	0.417589	-34.78	171	T26A8.1	GO:0016021,	-	gi|17542562|ref|NP_501436.1|	0	Uncharacterized protein CELE_T26A8.1 [Caenorhabditis elegans]
novel_mir7	NM_001307543.1	-34.5	0.266799	-50.01	311	eel-1	GO:0005737,GO:0005634,GO:0016874,GO:0004842,GO:0005515,GO:0045167,GO:0010468,GO:0031581,GO:0030178,GO:0042770,GO:0043065,GO:0042787,GO:0002119,GO:0009792,	K10592|1|0.0|8629|cel:CELE_Y67D8C.5|E3 ubiquitin-protein ligase HUWE1 [EC:2.3.2.26]	gi|808357892|ref|NP_001294472.1|	0	Enhancer of EfL-1 mutant phenotype [Caenorhabditis elegans]
novel_mir7	NM_001029675.2	-31.1	0.324827	-25.25	166	R08E3.1	-	K01691|1|8.18e-07|58.5|cqu:CpipJ_CPIJ003761|WNT inhibitory factor 1	gi|71994972|ref|NP_001024846.1|	0	Uncharacterized protein CELE_R08E3.1 [Caenorhabditis elegans]
novel_mir7	NM_078139.4	-30.9	0.136832	-25.55	158	nfki-1	GO:0008134,GO:0006351,GO:0006915,	K14242|1|6.60e-24|112|crg:105327341|NF-kappa-B inhibitor zeta!K14214|2|1.49e-17|90.9|ola:101156194|NF-kappa-B inhibitor delta!K04469|3|1.86e-16|89.0|xtr:448550|nuclear factor of kappa light polypeptide gene enhancer in B-cells 2	gi|17550756|ref|NP_510540.1|	0	Nuclear Factor of Kappa light polypeptide gene enhancer in b(B)-cells n [Caenorhabditis elegans]
novel_mir7	NM_001026272.3	-35.2	0.039696	-27.61	164	dlk-1	GO:0005929,GO:0005737,GO:0030425,GO:0043025,GO:0030424,GO:0030054,GO:0045202,GO:0008022,GO:0046872,GO:0031625,GO:0004709,GO:0005524,GO:0000186,GO:0046777,GO:0045773,GO:0048677,GO:0050807,GO:0002119,GO:1903616,GO:0048689,	K04422|1|0.0|1922|cel:CELE_F33E2.2|mitogen-activated protein kinase kinase kinase 13 [EC:2.7.11.25]!K04423|2|0.0|1432|cbr:CBG08707|mitogen-activated protein kinase kinase kinase 12 [EC:2.7.11.25]	gi|71985415|ref|NP_001021443.1|	0	Mitogen-activated protein kinase kinase kinase dlk-1 [Caenorhabditis elegans]
novel_mir7	NM_075727.4	-31.6	0.024499	-25.76	169	F13C5.5	GO:0016021,	-	gi|17551640|ref|NP_508128.1|	3.73941e-158	Uncharacterized protein CELE_F13C5.5 [Caenorhabditis elegans]
novel_mir7	NM_001307248.1	-28.4	0.64657	-45.46	305	Y40C5A.3	-	-	gi|808357298|ref|NP_001294177.1|	0	Uncharacterized protein CELE_Y40C5A.3 [Caenorhabditis elegans]
novel_mir7	NM_071441.1	-32.3	0.036362	-29.78	162	srt-7	GO:0016021,	-	gi|17558826|ref|NP_503842.1|	0	Serpentine Receptor, class T [Caenorhabditis elegans]
novel_mir7	NM_001026683.2	-32.8	0.493763	-27.99	168	vab-10	GO:0030056,GO:0009925,GO:0005882,GO:0016324,GO:0051015,GO:0040007,GO:0006898,GO:0048730,GO:0007050,GO:0040039,GO:0009792,GO:0002119,GO:0030163,GO:0010171,GO:0071688,GO:0040035,GO:0032940,	K10382|1|0.0|1004|dme:Dmel_CG18076|dystonin	gi|71997204|ref|NP_001021854.1|	0	Uncharacterized protein CELE_ZK1151.1 [Caenorhabditis elegans]
novel_mir7	NM_063108.5	-30.3	0.161944	-27.03	165	F32A5.3	GO:0045121,GO:0004185,GO:0051603,	K13289|1|3.10e-85|295|cel:CELE_Y16B4A.2|cathepsin A (carboxypeptidase C) [EC:3.4.16.5]	gi|17533609|ref|NP_495509.1|	0	Uncharacterized serine carboxypeptidase F32A5.3 [Caenorhabditis elegans]
novel_mir7	NR_144482.1	-34.6	0.089278	-29.32	164	Y48E1C.1	-	-	-	-	-
novel_mir7	NM_001322627.1	-27.9	0.65697	-46.1	302	utx-1	-	K11447|1|0.0|2391|cel:CELE_D2021.1|histone demethylase [EC:1.14.11.-]	gi|17551312|ref|NP_509450.1|	0	human UTX (Ubiquitously transcribed TPR on X) homolog [Caenorhabditis elegans]
novel_mir7	NM_001276519.1	-28.2	0.768598	-29.11	151	let-526	GO:0031932,GO:0090544,GO:0005737,GO:0031931,GO:0016303,GO:0004674,GO:0003677,GO:0005524,GO:0044877,GO:0008340,GO:0036092,GO:0018991,GO:0000492,GO:0040027,GO:0040007,GO:0006898,GO:0010629,GO:0043053,GO:0040011,GO:0006915,GO:0045727,GO:0009792,GO:0006468,GO:0006338,GO:0009408,GO:0007413,GO:0010171,GO:1903935,GO:0045944,GO:0031929,GO:0040035,GO:0048382,GO:0046854,GO:0006281,	K11653|1|0.0|3591|cel:CELE_C01G8.9|AT-rich interactive domain-containing protein 1	gi|453224740|ref|NP_001263448.1|	0	Uncharacterized protein CELE_C01G8.9 [Caenorhabditis elegans]
novel_mir7	NM_001313095.1	-29	0.591324	-46.31	297	egl-8	GO:0005622,GO:0030424,GO:0005912,GO:0005886,GO:0045202,GO:0043204,GO:0004871,GO:0004435,GO:0005509,GO:0008340,GO:0043052,GO:0016246,GO:0016042,GO:0007320,GO:0034609,GO:0040017,GO:0035418,GO:0043051,GO:0007212,GO:0046662,GO:0009792,GO:0014057,GO:0006935,GO:0030163,GO:0035556,	K05858|1|0.0|3067|cel:CELE_B0348.4|phosphatidylinositol phospholipase C, beta [EC:3.1.4.11]	gi|922580908|ref|NP_001300024.1|	0	Phosphoinositide phospholipase C [Caenorhabditis elegans]
novel_mir7	NM_001027448.3	-32.2	0.092442	-29.58	161	ndg-4	GO:0016021,GO:0009792,GO:0010171,	K01183|1|1.88e-19|98.2|api:100169337|chitinase [EC:3.2.1.14]	gi|71987048|ref|NP_001022619.1|	0	Uncharacterized protein CELE_F56F3.2 [Caenorhabditis elegans]
novel_mir7	NM_001270011.1	-30.5	0.516952	-97.89	501	mlt-11	GO:0004867,GO:0009792,GO:0002119,GO:0010951,GO:0018996,GO:0040011,	K03909|1|9.88e-31|127|acs:103280186|tissue factor pathway inhibitor	gi|392923273|ref|NP_001256940.1|	0	Uncharacterized protein CELE_W01F3.3 [Caenorhabditis elegans]
novel_mir7	NM_182317.3	-33.7	0.065132	-29.71	152	T22F3.3	GO:0005737,GO:0008184,GO:0030170,GO:0009792,GO:0005980,	K00688|1|0.0|1762|cel:CELE_T22F3.3|glycogen phosphorylase [EC:2.4.1.1]	gi|17564550|ref|NP_504007.1|	0	Alpha-1,4 glucan phosphorylase [Caenorhabditis elegans]
novel_mir7	NM_066441.6	-28.9	0.38783	-27.87	154	unc-116	GO:0043005,GO:0005829,GO:0005874,GO:0016938,GO:0005635,GO:0045202,GO:0008017,GO:0005524,GO:0008574,GO:0007411,GO:0040038,GO:0051296,GO:0030705,GO:0010940,GO:0048489,GO:0030951,GO:0009792,GO:0008104,GO:0030163,GO:0007413,GO:0010171,GO:0048814,GO:0007018,GO:0035188,	K10396|1|0.0|1683|cel:CELE_R05D3.7|kinesin family member 5	gi|17555418|ref|NP_498842.1|	0	Kinesin heavy chain [Caenorhabditis elegans]
novel_mir7	NM_066780.6	-27.7	0.033494	-26.51	153	ZK632.10	GO:0016021,	-	gi|17556987|ref|NP_499181.1|	1.45667e-50	UPF0057 membrane protein ZK632.10 [Caenorhabditis elegans]
novel_mir7	NM_171906.4	-25.1	0.687285	-66.77	461	ZK180.5	-	-	gi|32566508|ref|NP_741379.2|	0	Uncharacterized protein CELE_ZK180.5 [Caenorhabditis elegans]
novel_mir7	NM_001267197.1	-30.7	0.240123	-27.2	156	glr-4	GO:0045211,GO:0030054,GO:0016021,GO:0005234,GO:0004970,GO:0034220,GO:0035235,	K05313|1|0.0|1981|cel:CELE_C06A8.9|glutamate receptor, ionotropic, invertebrate	gi|392890672|ref|NP_001254126.1|	0	GLutamate Receptor family (AMPA) [Caenorhabditis elegans]
novel_mir7	NM_001129292.2	-31	0.297574	-61.67	321	C53B4.4	GO:0005622,GO:0046872,GO:0035556,	-	gi|392899890|ref|NP_001122764.2|	0	Uncharacterized protein CELE_C53B4.4 [Caenorhabditis elegans]
novel_mir7	NM_068419.4	-26.4	0.5542	-27.44	161	puf-7	GO:0005737,GO:0003730,GO:0017148,GO:0007049,GO:0051301,GO:0008285,GO:0006402,GO:0035188,GO:0048477,	K17943|1|7.96e-39|144|loa:LOAG_04126|pumilio RNA-binding family	gi|17541734|ref|NP_500820.1|	0	Pumilio domain-containing protein 7 [Caenorhabditis elegans]
novel_mir7	NM_001027317.5	-34	0.187017	-72.41	444	unc-52	GO:0005604,GO:0005509,GO:0005198,GO:0016477,GO:0008340,GO:0071688,GO:0016358,GO:0031581,GO:0000003,GO:0018996,GO:0048644,GO:0061199,GO:0008543,GO:0002119,GO:0040017,GO:0006898,GO:0030163,GO:0009792,	K06255|1|2.55e-172|599|lav:100668646|heparan sulfate proteoglycan 2 (perlecan)	gi|71998539|ref|NP_001022488.1|	0	Basement membrane proteoglycan [Caenorhabditis elegans]
novel_mir7	NM_074862.1	-34.4	0.007127	-30.07	161	thn-4	GO:0005576,GO:0006952,	-	gi|17561196|ref|NP_507263.1|	3.07066e-174	THaumatiN family [Caenorhabditis elegans]
novel_mir7	NM_001026152.3	-29.6	0.213431	-25.65	158	egal-1	GO:0003676,GO:0008408,GO:0005515,GO:0090305,GO:0018996,GO:0040011,	K18740|1|0.0|1191|cel:CELE_C10G6.1|exonuclease 3'-5' domain-containing protein 1	gi|71982768|ref|NP_001021323.1|	0	EGALitarian (Drosophila exonuclease-like) homolog [Caenorhabditis elegans]
novel_mir7	NM_078383.4	-28.3	0.592838	-30.84	157	sid-3	GO:0005737,GO:0031234,GO:0005102,GO:0005524,GO:0004715,GO:0016477,GO:0038083,GO:0045087,GO:0007169,GO:0030154,GO:0042127,GO:0016246,	K08886|1|0.0|1656|cel:CELE_B0302.1|activated CDC42 kinase 1 [EC:2.7.10.2 2.7.11.1]	gi|71981511|ref|NP_510784.2|	0	Tyrosine-protein kinase sid-3 [Caenorhabditis elegans]
novel_mir7	NM_064142.5	-27.8	0.129152	-28.1	140	ZK930.7	-	-	gi|922582082|ref|NP_496543.2|	8.64574e-148	Uncharacterized protein CELE_ZK930.7 [Caenorhabditis elegans]
novel_mir7	NM_078382.6	-28.3	0.627183	-30.84	157	sid-3	GO:0005737,GO:0031234,GO:0005102,GO:0005524,GO:0004715,GO:0016477,GO:0038083,GO:0045087,GO:0007169,GO:0030154,GO:0042127,GO:0016246,	K08886|1|0.0|2553|cel:CELE_B0302.1|activated CDC42 kinase 1 [EC:2.7.10.2 2.7.11.1]	gi|71981506|ref|NP_510783.2|	0	Tyrosine-protein kinase sid-3 [Caenorhabditis elegans]
novel_mir7	NM_001025906.3	-31.3	0.083678	-27.74	161	D2030.2	GO:0005759,GO:0004176,GO:0005524,GO:0071688,GO:0006508,GO:0002119,GO:0006898,GO:0030163,	K03544|1|0.0|957|cel:CELE_D2030.2|ATP-dependent Clp protease ATP-binding subunit ClpX	gi|71982908|ref|NP_001021077.1|	0	Uncharacterized protein CELE_D2030.2 [Caenorhabditis elegans]
novel_mir7	NM_075721.7	-32.1	0.234551	-30.66	159	mrp-1	GO:0005887,GO:0042626,GO:0005524,GO:0055085,GO:0040024,GO:0097501,GO:0016246,	K05665|1|0.0|3081|cel:CELE_F57C12.5|ATP-binding cassette, subfamily C (CFTR/MRP), member 1	gi|71992070|ref|NP_508122.2|	0	Uncharacterized protein CELE_F57C12.5 [Caenorhabditis elegans]
novel_mir7	NM_062515.3	-28.7	0.327121	-25.31	156	shc-2	-	-	gi|392889901|ref|NP_494916.2|	0	SHC (Src Homology domain C-terminal) adaptor homolog [Caenorhabditis elegans]
novel_mir7	NM_064647.1	-26.4	0.793263	-43.34	298	ZC101.1	-	-	-	-	-
novel_mir7	NM_058793.1	-25.8	0.59038	-48.33	299	col-50	GO:0016021,GO:0005581,GO:0042302,	K06236|1|2.86e-08|61.6|cmy:102934260|collagen, type I, alpha!K19720|2|1.34e-07|59.3|cge:100753589|collagen, type III, alpha	gi|17509327|ref|NP_491194.1|	0	COLlagen [Caenorhabditis elegans]
novel_mir7	NM_001026688.3	-32.8	0.456973	-27.99	168	vab-10	GO:0030056,GO:0009925,GO:0005882,GO:0016324,GO:0051015,GO:0040007,GO:0006898,GO:0048730,GO:0007050,GO:0040039,GO:0009792,GO:0002119,GO:0030163,GO:0010171,GO:0071688,GO:0040035,GO:0032940,	K10382|1|0.0|947|dme:Dmel_CG18076|dystonin	gi|71997231|ref|NP_001021859.1|	0	Uncharacterized protein CELE_ZK1151.1 [Caenorhabditis elegans]
novel_mir7	NM_061008.3	-29.6	0.431754	-48.52	298	Y6B3B.4	-	-	gi|392887675|ref|NP_493409.3|	0	Uncharacterized protein CELE_Y6B3B.4 [Caenorhabditis elegans]
novel_mir7	NM_001313396.1	-29.2	0.790142	-65.87	465	fln-2	GO:0040011,GO:0018996,	K04437|1|0.0|5870|cel:CELE_C23F12.1|filamin	gi|922581563|ref|NP_509580.6|	0	FiLamiN (actin binding protein) homolog [Caenorhabditis elegans]
novel_mir7	NM_170824.3	-28.2	0.539954	-25.91	153	dot-1.1	GO:0005634,GO:0031151,GO:0051726,GO:0034729,	K11427|1|0.0|1958|cel:CELE_Y39G10AR.18|histone-lysine N-methyltransferase, H3 lysine-79 specific [EC:2.1.1.43]	gi|71994293|ref|NP_740808.2|	0	Histone-lysine N-methyltransferase, H3 lysine-79 specific [Caenorhabditis elegans]
novel_mir7	NM_001029029.3	-30.4	0.668417	-31.22	154	ttn-1	GO:0031965,GO:0005865,GO:0031430,GO:0030018,GO:0005859,GO:0046872,GO:0008307,GO:0097493,GO:0004674,GO:0051371,GO:0051015,GO:0005524,GO:0006941,GO:0045214,GO:0009792,GO:0006468,GO:0007015,GO:0071688,	K12567|1|4.38e-25|121|obi:106879228|titin [EC:2.7.11.1]	gi|72000917|ref|NP_001024201.1|	0	TiTiN family [Caenorhabditis elegans]
novel_mir7	NM_071801.6	-30.5	0.082727	-27.52	150	F32D1.5	GO:1902560,GO:0046872,GO:0003920,GO:0006144,GO:0009792,GO:0002119,GO:0006163,GO:0040007,GO:0055114,	K00364|1|0.0|746|cel:CELE_F32D1.5|GMP reductase [EC:1.7.1.7]	gi|17560440|ref|NP_504202.1|	0	GMP reductase [Caenorhabditis elegans]
novel_mir7	NM_001047582.3	-31.4	0.178152	-26.98	164	eps-8	GO:0030056,GO:0005903,GO:0045177,GO:0051015,GO:0000003,GO:0040027,GO:0006898,GO:0051017,GO:0040026,GO:0048730,GO:0040011,GO:0045185,GO:0009792,GO:0045109,GO:0048546,GO:0030421,GO:0048598,GO:0051016,	K17277|1|0.0|1887|cel:CELE_Y57G11C.24|epidermal growth factor receptor kinase substrate 8	gi|115533054|ref|NP_001041047.1|	0	EPS (human endocytosis) related [Caenorhabditis elegans]
novel_mir7	NM_001267467.1	-28.4	0.673845	-42.23	297	nep-17	GO:0016021,GO:0045121,GO:0004222,GO:0006508,	K08635|1|1.82e-119|409|sko:102800538|membrane metallo-endopeptidase-like 1!K01415|4|3.63e-83|297|cbr:CBG17774|endothelin-converting enzyme [EC:3.4.24.71]	gi|392892296|ref|NP_001254395.1|	0	NEPrilysin metallopeptidase family [Caenorhabditis elegans]
novel_mir7	NM_001136323.2	-28.6	0.291242	-28.96	160	W04A8.1	GO:0016591,GO:0008420,GO:0070940,GO:0002119,	K19403|1|2.50e-10|68.6|bmy:Bm1_49645|microcephalin	gi|17509553|ref|NP_493420.1|	0	Uncharacterized protein CELE_W04A8.1 [Caenorhabditis elegans]
novel_mir7	NM_067006.2	-33.9	0.182457	-29.54	161	dhc-4	GO:0003777,GO:0007018,	K10408|1|9.89e-21|106|sko:100372460|dynein heavy chain, axonemal	gi|392896607|ref|NP_499407.2|	0	Dynein Heavy Chain [Caenorhabditis elegans]
novel_mir7	NM_078122.3	-28.7	0.380995	-26.69	152	T10B10.3	-	-	gi|17569739|ref|NP_510523.1|	0	Uncharacterized protein CELE_T10B10.3 [Caenorhabditis elegans]
novel_mir7	NM_069762.2	-31.4	0.047262	-25.74	161	C10C6.3	-	-	gi|71982745|ref|NP_502163.2|	0	Uncharacterized protein CELE_C10C6.3 [Caenorhabditis elegans]
novel_mir7	NM_001029570.2	-33.2	0.075629	-28.1	168	eat-20	GO:0009986,GO:0030424,GO:0016021,GO:0005509,GO:0040035,GO:0030163,	K02599|1|5.63e-17|91.3|crg:105322166|Notch 1!K17495|4|1.42e-15|87.4|tup:102500773|CUB and sushi domain-containing protein	gi|71992684|ref|NP_001024741.1|	0	Abnormal pharyngeal pumping eat-20 [Caenorhabditis elegans]
novel_mir7	NM_001313643.1	-28.2	0.741587	-60.22	317	sea-2	GO:0005737,GO:0005634,GO:0003725,GO:0003727,GO:0009792,GO:0040034,GO:0007549,GO:0010629,GO:0008340,GO:0009408,	-	gi|922582098|ref|NP_001300481.1|	0	Signal Element on Autosome [Caenorhabditis elegans]
novel_mir7	NM_001047256.3	-34.4	0.230302	-29.44	157	vab-10	GO:0030056,GO:0009925,GO:0005882,GO:0016324,GO:0051015,GO:0040007,GO:0006898,GO:0048730,GO:0007050,GO:0040039,GO:0009792,GO:0002119,GO:0030163,GO:0010171,GO:0071688,GO:0040035,GO:0032940,	K10382|1|0.0|1425|tsp:Tsp_07976|dystonin	gi|115532412|ref|NP_001040721.1|	0	Uncharacterized protein CELE_ZK1151.1 [Caenorhabditis elegans]
novel_mir7	NM_068700.5	-26.8	0.094323	-25.52	146	Y43B11AR.1	-	-	gi|115534388|ref|NP_501101.2|	9.75988e-74	Uncharacterized protein CELE_Y43B11AR.1 [Caenorhabditis elegans]
novel_mir7	NM_001270146.2	-29.2	0.732843	-65.87	465	fln-2	GO:0040011,GO:0018996,	K04437|1|0.0|3338|cel:CELE_C23F12.1|filamin	gi|922581622|ref|NP_001300320.1|	0	FiLamiN (actin binding protein) homolog [Caenorhabditis elegans]
novel_mir7	NM_001268229.1	-34.5	0.097143	-31.99	166	Y79H2A.3	GO:0006898,GO:0002119,GO:0040011,	-	gi|392896890|ref|NP_001255158.1|	0	Uncharacterized protein CELE_Y79H2A.3 [Caenorhabditis elegans]
novel_mir7	NM_001026024.2	-25.1	0.750049	-53.5	316	sel-8	GO:0005634,GO:0040035,GO:0006355,GO:0040020,GO:0035188,GO:0002119,GO:0042127,GO:0006898,GO:0009792,GO:0051729,	-	gi|71982666|ref|NP_001021194.1|	0	Protein lag-3 [Caenorhabditis elegans]
[truncated: 2,248 more rows]
