# Supplementary material for: The whole transcriptome regulation as a function of mitochondrial polymorphisms and aging in Caenorhabditis elegans
Source: Aging (Albany NY). 2020 Feb 4;12(3):2453–70. doi: 10.18632/aging.102754 (PMC7041728; doi:10.18632/aging.102754)
Supplement: Supplementary Table 4 [file aging-12-102754-s010..xlsx]

## Sheet: Sheet1
lncRNA_class	distance	Overlap_class	lncRNA	mRNA	lncRNA_chr	lncRNA_start	lncRNA_end	lncRNA_length	lncRNA_chain	mRNA_chr	mRNA_start	mRNA_end	mRNA_length	mRNA_chain	minimum_free_energy_of_RNAplex	Pearson_correlation	Spearman_correlation	lnNCD6-FPKM_lncRNA	lnN2D0A1-FPKM_lncRNA	lnN2D12-FPKM_lncRNA	lnNCD0A3-FPKM_lncRNA	lnNCD12-FPKM_lncRNA	lnN2D6-FPKM_lncRNA	lnNCD9-FPKM_lncRNA	lnN2D0A2-FPKM_lncRNA	lnNCD0A1-FPKM_lncRNA	lnN2D9-FPKM_lncRNA	lnN2D0A3-FPKM_lncRNA	lnNCD0A2-FPKM_lncRNA	lnNCD6-FPKM_mRNA	lnN2D0A1-FPKM_mRNA	lnN2D12-FPKM_mRNA	lnNCD0A3-FPKM_mRNA	lnNCD12-FPKM_mRNA	lnN2D6-FPKM_mRNA	lnNCD9-FPKM_mRNA	lnN2D0A2-FPKM_mRNA	lnNCD0A1-FPKM_mRNA	lnN2D9-FPKM_mRNA	lnN2D0A3-FPKM_mRNA	lnNCD0A2-FPKM_mRNA
cis_mRNA_dw20k	11212	NA	LTCONS_00000057	NM_001306287.1	NC_003279.8	274707	275141	435	+	NC_003279.8	286352	289074	906	-	*	0.6911	0.6995	0.49	0	0.47	0.07	0.23	0.15	0.39	0.13	0.07	0.16	0	0.15	9.65	4.27	12.55	2.93	5.53	11.95	9.1	1.35	3.6	10.07	3.16	3.97
cis_mRNA_dw20k	11231	NA	LTCONS_00000057	NM_058310.4	NC_003279.8	274707	275141	435	+	NC_003279.8	286371	289074	1011	-	*	0.7445	0.826	0.49	0	0.47	0.07	0.23	0.15	0.39	0.13	0.07	0.16	0	0.15	9.37	2.52	5.64	3.21	6.88	7	8.41	1.19	3.44	7.34	2.55	3.63
cis_mRNA_up10k	4980	NA	LTCONS_00000057	NM_058308.1	NC_003279.8	274707	275141	435	+	NC_003279.8	280120	280445	222	+	*	0.7639	0.6539	0.49	0	0.47	0.07	0.23	0.15	0.39	0.13	0.07	0.16	0	0.15	0.33	0	0.19	0	0	0	0	0	0	0	0	0
cis_mRNA_dw20k	9411	NA	LTCONS_00000058	NM_058310.4	NC_003279.8	276241	276961	721	+	NC_003279.8	286371	289074	1011	-	*	0.6459	0.6165	0.73	0.14	0.28	0.35	0.68	0.16	0.39	0.07	0.22	0.12	0.07	0.23	9.37	2.52	5.64	3.21	6.88	7	8.41	1.19	3.44	7.34	2.55	3.63
cis_mRNA_dw20k	9715	NA	LTCONS_00000083	NM_058331.4	NC_003279.8	433365	443691	10327	+	NC_003279.8	420934	423651	1497	+	*	0.8182	0.7404	0.5	0.26	0.37	0.37	0.66	0.33	0.6	0.19	0.41	0.39	0.21	0.48	0.68	0.37	0.73	0.39	1.12	0.37	0.81	0.47	0.41	0.45	0.31	0.53
cis_mRNA_dw20k	8629	NA	LTCONS_00000086	NM_058333.4	NC_003279.8	471188	474713	1327	+	NC_003279.8	462000	462560	453	+	*	-0.6404	-0.6281	1.03	0.07	1.03	0.21	1.52	0.33	1.91	0.03	0.18	0.33	0.13	0.15	52.4	55.31	51.49	63.19	50.33	56.49	54.48	63.03	59.58	54.1	54.4	59.99
cis_mRNA_dw20k	9979	NA	LTCONS_00000086	NM_001025812.3	NC_003279.8	471188	474713	1327	+	NC_003279.8	444018	461210	3666	+	*	0.6068	0.7439	1.03	0.07	1.03	0.21	1.52	0.33	1.91	0.03	0.18	0.33	0.13	0.15	60.89	22.13	58.78	25.51	50.06	66.87	57.61	22.51	28.1	65.05	24.06	26.03
cis_mRNA_up10k	2991	NA	LTCONS_00000086	NM_058335.3	NC_003279.8	471188	474713	1327	+	NC_003279.8	477703	481898	1338	+	*	0.9101	0.9754	1.03	0.07	1.03	0.21	1.52	0.33	1.91	0.03	0.18	0.33	0.13	0.15	1.03	0.07	0.77	0.17	2.84	0.27	1.87	0.02	0.14	0.24	0.04	0.15
cis_mRNA_up10k	3108	NA	LTCONS_00000107	NM_058350.3	NC_003279.8	547096	547601	506	+	NC_003279.8	550708	556061	2730	+	*	0.6315	0.614	0.26	0.45	0.13	0.33	0.13	0	0.31	0.16	0.4	0.26	0.11	0.42	16.3	24.9	14.01	32	14.72	11.45	15.94	18.76	29.4	13.18	26.42	28.34
cis_mRNA_dw20k	3872	NA	LTCONS_00000126	NM_001306320.1	NC_003279.8	659437	660570	1134	+	NC_003279.8	664441	666806	1176	-	*	-0.7188	-0.7228	0.96	0.04	0.56	0.04	0.73	0.14	0.53	0.08	0.11	0.2	0.06	0.13	0.83	11.52	0.33	9.89	0.09	0.07	0.46	11.19	10.3	0.07	11.81	9.64
cis_mRNA_dw20k	4697	NA	LTCONS_00000126	NM_001306321.1	NC_003279.8	659437	660570	1134	+	NC_003279.8	665266	666806	618	-	*	-0.6488	-0.8899	0.96	0.04	0.56	0.04	0.73	0.14	0.53	0.08	0.11	0.2	0.06	0.13	0	3.43	0	1.86	0	0	0	1.17	1.55	0	3.49	1.26
cis_mRNA_dw20k	5693	NA	LTCONS_00000126	NM_001306316.1	NC_003279.8	659437	660570	1134	+	NC_003279.8	638209	653745	1308	+	*	-0.6285	-0.8792	0.96	0.04	0.56	0.04	0.73	0.14	0.53	0.08	0.11	0.2	0.06	0.13	2.91	10.27	3.85	7.2	3.79	3.43	3.99	4.22	6.36	4.08	10.79	6.69
cis_mRNA_dw20k	7046	NA	LTCONS_00000126	NM_001026562.2	NC_003279.8	659437	660570	1134	+	NC_003279.8	667615	674413	1404	-	*	0.614	0.6386	0.96	0.04	0.56	0.04	0.73	0.14	0.53	0.08	0.11	0.2	0.06	0.13	0.22	0.21	0.16	0.03	0.39	0.11	0.14	0.06	0	0.25	0.08	0.14
cis_mRNA_dw20k	794	NA	LTCONS_00000126	NM_058364.4	NC_003279.8	659437	660570	1134	+	NC_003279.8	654128	658644	1329	+	*	0.7613	0.8406	0.96	0.04	0.56	0.04	0.73	0.14	0.53	0.08	0.11	0.2	0.06	0.13	33.67	15.11	41.04	11.25	35.85	31.21	32.51	16.06	12.27	33.27	14.06	12.45
cis_mRNA_dw20k	2443	NA	LTCONS_00000127	NM_001306320.1	NC_003279.8	661308	661999	692	+	NC_003279.8	664441	666806	1176	-	*	-0.7221	-0.6095	0.98	0.34	0.5	0	1.51	0.33	1.12	0.04	0.19	0.48	0.08	0.28	0.83	11.52	0.33	9.89	0.09	0.07	0.46	11.19	10.3	0.07	11.81	9.64
cis_mRNA_dw20k	2665	NA	LTCONS_00000127	NM_058364.4	NC_003279.8	661308	661999	692	+	NC_003279.8	654128	658644	1329	+	*	0.7167	0.8252	0.98	0.34	0.5	0	1.51	0.33	1.12	0.04	0.19	0.48	0.08	0.28	33.67	15.11	41.04	11.25	35.85	31.21	32.51	16.06	12.27	33.27	14.06	12.45
cis_mRNA_dw20k	5617	NA	LTCONS_00000127	NM_001026562.2	NC_003279.8	661308	661999	692	+	NC_003279.8	667615	674413	1404	-	*	0.7906	0.8266	0.98	0.34	0.5	0	1.51	0.33	1.12	0.04	0.19	0.48	0.08	0.28	0.22	0.21	0.16	0.03	0.39	0.11	0.14	0.06	0	0.25	0.08	0.14
cis_mRNA_dw20k	518	NA	LTCONS_00000146	NM_058376.2	NC_003279.8	760946	761277	332	+	NC_003279.8	758756	760429	456	+	*	0.8209	0.7898	0	0.42	0.12	1.1	0	0	0	0.19	0.65	0	0.11	0.34	0.68	1.77	0	3.45	0	0	0.07	0.86	3.59	0	2.03	3.47
cis_mRNA_up10k	2399	NA	LTCONS_00000146	NM_001026440.4	NC_003279.8	760946	761277	332	+	NC_003279.8	763675	770625	1518	+	*	0.7963	0.8484	0	0.42	0.12	1.1	0	0	0	0.19	0.65	0	0.11	0.34	2.2	28.15	0.99	36.95	0.39	0.59	0.35	5.8	34.32	1.19	30.77	32.25
cis_mRNA_up10k	2399	NA	LTCONS_00000146	NM_001026441.2	NC_003279.8	760946	761277	332	+	NC_003279.8	763675	768812	1368	+	*	0.9468	0.8063	0	0.42	0.12	1.1	0	0	0	0.19	0.65	0	0.11	0.34	0.28	1.28	0	3.71	0.15	0.35	0.53	1.06	1.67	0	0.68	1.86
cis_mRNA_up10k	4022	NA	LTCONS_00000146	NM_058375.4	NC_003279.8	760946	761277	332	+	NC_003279.8	748484	756925	1467	-	*	0.8065	0.8629	0	0.42	0.12	1.1	0	0	0	0.19	0.65	0	0.11	0.34	2.3	21.04	2.26	25.54	2.48	0.72	1.89	4.55	22.41	0.88	20.86	20.39
cis_mRNA_dw20k	241	NA	LTCONS_00000162	MTCONS_00000161	NC_003279.8	872401	873997	1597	+	NC_003279.8	853459	872161	2644	+	*	0.6879	0.8531	0.83	0.2	0.73	0.14	0.98	0.68	1.68	0.13	0.47	0.45	0.38	0.72	48.6	21.01	48.67	19.5	50.16	61.89	52.35	20.53	22.88	44.3	22.65	23.02
cis_mRNA_dw20k	584	NA	LTCONS_00000162	NM_058384.3	NC_003279.8	872401	873997	1597	+	NC_003279.8	853459	871818	2295	+	*	0.6961	0.6165	0.83	0.2	0.73	0.14	0.98	0.68	1.68	0.13	0.47	0.45	0.38	0.72	58.99	36.25	58.39	33.18	64.91	50.93	63.37	35.8	35.03	61.67	35.03	32.38
cis_mRNA_dw20k	14089	NA	LTCONS_00000221	NM_001026608.5	NC_003279.8	1272201	1272826	626	+	NC_003279.8	1254777	1258113	420	+	*	-0.6984	-0.627	0.15	0.72	0.05	0.54	0.43	0.05	0.38	0.2	0.65	0.1	0.56	0.77	16.15	7.28	15.12	9.51	15.82	14.77	17.48	8.16	9.74	16.83	9.65	7.45
cis_mRNA_up10k	4048	NA	LTCONS_00000221	NM_058436.4	NC_003279.8	1272201	1272826	626	+	NC_003279.8	1259489	1268154	1692	-	*	0.8244	0.8371	0.15	0.72	0.05	0.54	0.43	0.05	0.38	0.2	0.65	0.1	0.56	0.77	1.62	5.95	1.4	5.4	3.98	1.54	2.35	1.79	4.2	1.84	6.43	3.58
cis_mRNA_dw20k	5089	NA	LTCONS_00000238	NM_001262053.1	NC_003279.8	1341844	1342777	934	+	NC_003279.8	1335395	1336756	402	+	*	-0.7947	-0.8371	0.65	0.16	0.75	0.15	0.5	0.23	0.83	0.1	0.27	0.37	0.19	0.41	0.09	1.6	0	2.04	0.51	0.56	0.27	1.24	1.2	0.09	1.62	0.57
cis_mRNA_overlap	0	Lnc-AntiOverlap-mRNA	LTCONS_00000238	NM_058442.3	NC_003279.8	1341844	1342777	934	+	NC_003279.8	1341355	1344692	1497	-	-1376.33	-0.6985	-0.6014	0.65	0.16	0.75	0.15	0.5	0.23	0.83	0.1	0.27	0.37	0.19	0.41	63.66	93.92	61.8	93.91	60.5	64.26	66.76	86.06	94.14	62.73	92.06	87.27
cis_mRNA_up10k	5842	NA	LTCONS_00000238	NM_170800.3	NC_003279.8	1341844	1342777	934	+	NC_003279.8	1348618	1358416	1278	+	*	0.6898	0.7902	0.65	0.16	0.75	0.15	0.5	0.23	0.83	0.1	0.27	0.37	0.19	0.41	52.19	27.97	40.21	29.72	43.79	51.27	48.89	27.16	31.8	37.63	31.21	33.87
cis_mRNA_overlap	0	Lnc-AntiOverlap-mRNA	LTCONS_00000260	NM_001306497.1	NC_003279.8	1500664	1501187	524	+	NC_003279.8	1491340	1514409	4137	-	-1048.7	0.6291	0.7167	0.31	0	0.36	0.05	0.84	0	0.42	0.1	0	0.31	0.16	0	28.32	10.89	38.35	11.94	27.69	28.22	28.35	17.19	13.19	27.04	13.82	11.53
cis_mRNA_dw20k	17443	NA	LTCONS_00000288	NM_058478.3	NC_003279.8	1687192	1695802	8611	+	NC_003279.8	1667728	1669750	819	+	*	-0.8047	-0.7063	1.4	0.76	1.52	0.82	1.26	1.24	1.67	0.59	0.89	1.5	1	1.14	2.99	29.29	1.39	26.59	1.06	0.67	1.65	17.65	24.05	0.61	28.84	23.64
cis_mRNA_up10k	2550	NA	LTCONS_00000288	MTCONS_00000291	NC_003279.8	1687192	1695802	8611	+	NC_003279.8	1698351	1701698	1550	+	*	0.8331	0.7902	1.4	0.76	1.52	0.82	1.26	1.24	1.67	0.59	0.89	1.5	1	1.14	37.01	18.21	32.29	20.41	34.14	45.94	43.64	17.12	20.81	32.98	18.07	26.95
cis_mRNA_up10k	6322	NA	LTCONS_00000288	MTCONS_00000295	NC_003279.8	1687192	1695802	8611	+	NC_003279.8	1702123	1707992	1737	+	*	0.7854	0.7972	1.4	0.76	1.52	0.82	1.26	1.24	1.67	0.59	0.89	1.5	1	1.14	30	14.29	23.86	17.07	23.05	31.72	24.27	12.34	16.5	25.42	17.09	17.02
cis_mRNA_dw20k	16674	NA	LTCONS_00000299	NM_058481.5	NC_003279.8	1717460	1718236	777	+	NC_003279.8	1698351	1700787	732	+	*	0.7533	0.648	0.29	0.26	0.11	0.1	0.8	0.25	0.32	0.06	0	0.23	0.13	0	73.06	56.43	75.32	50.26	86.31	59.11	64.86	56.38	56.71	69.38	52.05	40.2
cis_mRNA_dw20k	2066	NA	LTCONS_00000299	NM_001306511.1	NC_003279.8	1717460	1718236	777	+	NC_003279.8	1709587	1715395	822	+	*	0.7561	0.8021	0.29	0.26	0.11	0.1	0.8	0.25	0.32	0.06	0	0.23	0.13	0	16.34	11.11	10.97	11.68	19.9	12.01	21.71	8.36	11.39	12.86	11.81	10.35
cis_mRNA_dw20k	1816	NA	LTCONS_00000324	NM_058500.4	NC_003279.8	1827720	1832113	1214	+	NC_003279.8	1823454	1825905	1470	+	*	0.7615	0.648	0.97	0.5	1.48	0.36	0.87	0.43	0.95	0.27	0.28	0.75	0.32	0.32	4.23	1.2	6.98	0.78	4.91	5.85	4.42	1.91	0.95	6.65	0.82	1.9
cis_mRNA_up10k	2777	NA	LTCONS_00000324	NM_058504.6	NC_003279.8	1827720	1832113	1214	+	NC_003279.8	1834889	1835394	411	+	*	-0.6786	-0.683	0.97	0.5	1.48	0.36	0.87	0.43	0.95	0.27	0.28	0.75	0.32	0.32	1168.46	1856.98	1359.06	2037.16	1348.71	1105.92	1309.58	2009.34	1798.01	1374.66	1905.23	1880.05
cis_mRNA_up10k	4790	NA	LTCONS_00000324	NM_001026652.2	NC_003279.8	1827720	1832113	1214	+	NC_003279.8	1818590	1822931	1002	-	*	-0.7523	-0.6035	0.97	0.5	1.48	0.36	0.87	0.43	0.95	0.27	0.28	0.75	0.32	0.32	0.88	13.45	0.39	11.26	1.06	0.28	0.38	11.36	9.96	0.88	13.41	10.5
cis_mRNA_up10k	5525	NA	LTCONS_00000324	NM_001306519.1	NC_003279.8	1827720	1832113	1214	+	NC_003279.8	1818590	1822196	762	-	*	0.7411	0.7109	0.97	0.5	1.48	0.36	0.87	0.43	0.95	0.27	0.28	0.75	0.32	0.32	0.05	0	1.76	0	0	0.67	0.84	0	0	0.18	0	0
cis_mRNA_up10k	785	NA	LTCONS_00000324	NM_170804.4	NC_003279.8	1827720	1832113	1214	+	NC_003279.8	1832897	1834746	1665	+	*	0.8247	0.7426	0.97	0.5	1.48	0.36	0.87	0.43	0.95	0.27	0.28	0.75	0.32	0.32	219.47	180.86	231.23	178.29	235.23	199.25	214.9	202.64	173.56	215.23	188.97	169.95
cis_mRNA_dw20k	3751	NA	LTCONS_00000362	NM_170818.4	NC_003279.8	2064305	2065379	961	+	NC_003279.8	2069129	2069513	336	-	*	-0.7032	-0.6643	110.06	89.16	119.96	93.84	122.73	106.92	120.03	80.09	93.9	122.55	96.99	83.21	46.08	100.18	60.95	135.52	62.05	40.3	46.19	122.83	92	76.74	96.64	81.87
cis_mRNA_dw20k	4343	NA	LTCONS_00000362	NM_058526.6	NC_003279.8	2064305	2065379	961	+	NC_003279.8	2069721	2070604	438	-	*	-0.8217	-0.6923	110.06	89.16	119.96	93.84	122.73	106.92	120.03	80.09	93.9	122.55	96.99	83.21	3313.75	5411.51	4096.89	5599.32	3598.31	3570.72	3572.03	5759.26	5216.76	4132.58	5457.94	4908.31
cis_mRNA_up10k	364	NA	LTCONS_00000362	NM_058521.4	NC_003279.8	2064305	2065379	961	+	NC_003279.8	2061736	2063942	1209	-	*	0.8874	0.8581	110.06	89.16	119.96	93.84	122.73	106.92	120.03	80.09	93.9	122.55	96.99	83.21	42.89	17.58	56.48	19.09	44.68	55.05	43.99	17.21	19.32	51.17	19.32	17.33
cis_mRNA_up10k	371	NA	LTCONS_00000362	NM_001037898.1	NC_003279.8	2064305	2065379	961	+	NC_003279.8	2065749	2069049	1104	+	*	0.7348	0.8231	110.06	89.16	119.96	93.84	122.73	106.92	120.03	80.09	93.9	122.55	96.99	83.21	1.24	0.09	2.44	0.31	3.89	0.4	3.81	0	0.68	0.33	0.64	0
cis_mRNA_up10k	5975	NA	LTCONS_00000362	NM_058528.4	NC_003279.8	2064305	2065379	961	+	NC_003279.8	2071353	2072298	828	+	*	-0.7157	-0.8112	110.06	89.16	119.96	93.84	122.73	106.92	120.03	80.09	93.9	122.55	96.99	83.21	214.51	275.3	272.72	290.12	236.69	253.68	220.94	294.86	271.23	254.08	274.87	277.91
cis_mRNA_dw20k	3148	NA	LTCONS_00000384	NM_001026574.3	NC_003279.8	2148908	2149424	466	+	NC_003279.8	2128590	2145761	2493	+	*	-0.8044	-0.7135	0.8	0.19	0.35	0.06	0.77	0.35	1.05	0.18	0.13	0.44	0.19	0.13	100.05	111.12	91.25	112.59	88.25	108.36	83.53	111.31	109.62	108.66	121.34	106.42
cis_mRNA_up10k	7081	NA	LTCONS_00000385	NM_001026489.4	NC_003279.8	2152673	2152991	319	+	NC_003279.8	2160071	2209333	4983	+	*	0.6925	0.6867	0.4	0	0.63	0.21	0	0.24	0.38	0	0	0.25	0	0	33.19	9.52	34.38	8.67	27.18	43.92	30.66	10.68	10.16	36.12	7.89	10.77
cis_mRNA_up10k	7081	NA	LTCONS_00000385	NM_001026490.4	NC_003279.8	2152673	2152991	319	+	NC_003279.8	2160071	2209333	4689	+	*	-0.6242	-0.744	0.4	0	0.63	0.21	0	0.24	0.38	0	0	0.25	0	0	1.18	2.87	0.82	2.2	1.45	0.14	0.73	1.4	2.29	0.32	3.74	2.29
cis_mRNA_up10k	7081	NA	LTCONS_00000385	NM_001306400.1	NC_003279.8	2152673	2152991	319	+	NC_003279.8	2160071	2209333	4695	+	*	-0.6881	-0.7427	0.4	0	0.63	0.21	0	0.24	0.38	0	0	0.25	0	0	2.03	3.43	1.75	2.5	2	1	1.53	2.66	3.34	1.78	3.56	3.18
cis_mRNA_dw20k	10026	NA	LTCONS_00000386	NM_001026574.3	NC_003279.8	2155786	2157776	1991	+	NC_003279.8	2128590	2145761	2493	+	*	-0.9341	-0.8392	0.5	0.26	0.59	0.1	0.64	0.19	0.58	0.16	0.18	0.28	0.07	0.15	100.05	111.12	91.25	112.59	88.25	108.36	83.53	111.31	109.62	108.66	121.34	106.42
cis_mRNA_up10k	2296	NA	LTCONS_00000386	NM_058537.4	NC_003279.8	2155786	2157776	1991	+	NC_003279.8	2160071	2209333	4977	+	*	0.9051	0.6713	0.5	0.26	0.59	0.1	0.64	0.19	0.58	0.16	0.18	0.28	0.07	0.15	22.02	8.86	18.29	7.91	19.12	7.81	16.31	5.93	7.38	8.43	8.55	8.73
cis_mRNA_up10k	4579	NA	LTCONS_00000479	NM_058617.2	NC_003279.8	2636675	2638162	1388	+	NC_003279.8	2642740	2643703	762	+	*	0.6511	0.7075	1.15	1.11	1.43	0.7	2.03	1.25	1.44	0.95	0.53	1.25	1.3	0.87	39.4	19.82	50.99	18.44	42.46	45.38	40.54	21.93	19.18	51.31	19.21	18.2
cis_mRNA_up10k	8099	NA	LTCONS_00000479	NM_058612.1	NC_003279.8	2636675	2638162	1388	+	NC_003279.8	2623360	2628577	2730	-	*	0.6339	0.7356	1.15	1.11	1.43	0.7	2.03	1.25	1.44	0.95	0.53	1.25	1.3	0.87	79.29	40.72	96.62	52.41	83.05	95.5	94.06	37.94	50.35	86.79	60.61	58.38
tran	NA	NA	LTCONS_00000479	MTCONS_00031249	NC_003279.8	2636675	2638162	1388	+	NC_003283.11	15593462	15602345	6780	-	-655.09	0.6276	0.6725	1.15	1.11	1.43	0.7	2.03	1.25	1.44	0.95	0.53	1.25	1.3	0.87	1.39	0.43	0.69	0.39	1.6	0.59	1.9	0.44	0.56	0.49	0.74	0.7
cis_mRNA_up10k	5826	NA	LTCONS_00000493	NM_058625.2	NC_003279.8	2688604	2691615	3012	+	NC_003279.8	2697440	2699955	1044	+	*	0.7441	0.6632	0.27	0.12	0.24	0.45	0.85	0.04	0.53	0.29	0.53	0.11	0.19	0.72	0.08	0.11	0.15	0.25	0.78	0.23	0.13	0.23	0.35	0	0.14	0.27
cis_mRNA_up10k	2145	NA	LTCONS_00000502	NM_058629.5	NC_003279.8	2723613	2724522	910	+	NC_003279.8	2718128	2721469	717	-	*	-0.7205	-0.683	0.39	0.43	0.12	0.4	0.15	0.39	0.42	0.37	0.5	0.09	0.55	0.48	51.15	27.67	59.25	32.11	55.52	50.59	55.7	30.71	31.27	52.85	28.74	30.1
cis_mRNA_up10k	2497	NA	LTCONS_00000502	NM_058631.5	NC_003279.8	2723613	2724522	910	+	NC_003279.8	2727018	2727304	234	+	*	-0.688	-0.669	0.39	0.43	0.12	0.4	0.15	0.39	0.42	0.37	0.5	0.09	0.55	0.48	102.8	116.17	133.83	136.8	130.3	132.44	92.32	147.52	109.21	176.15	111.07	92.46
cis_mRNA_dw20k	10644	NA	LTCONS_00000509	NM_001262313.1	NC_003279.8	2786299	2787570	1103	+	NC_003279.8	2798213	2799844	1095	-	*	0.9818	0.9441	2.18	44.18	1.17	31.93	0.63	0.05	1.02	31.74	30.58	0.23	45	35.8	2.53	12.61	2.22	8.34	2.07	0.26	1.57	8.13	8.74	0.14	13.23	8.35
cis_mRNA_dw20k	1201	NA	LTCONS_00000509	NM_058645.4	NC_003279.8	2786299	2787570	1103	+	NC_003279.8	2788770	2790309	1077	-	*	0.9965	0.9597	2.18	44.18	1.17	31.93	0.63	0.05	1.02	31.74	30.58	0.23	45	35.8	0.3	3.76	0.22	2.67	0.1	0.1	0.12	2.98	2.45	0.08	3.51	2.95
cis_mRNA_dw20k	412	NA	LTCONS_00000509	NM_001306456.1	NC_003279.8	2786299	2787570	1103	+	NC_003279.8	2787981	2788418	438	-	*	0.7552	0.7686	2.18	44.18	1.17	31.93	0.63	0.05	1.02	31.74	30.58	0.23	45	35.8	0.08	0.69	0	1.59	0	0	0	0.78	1.83	0	0.76	2.06
cis_mRNA_up10k	2029	NA	LTCONS_00000509	NM_058642.3	NC_003279.8	2786299	2787570	1103	+	NC_003279.8	2780850	2784271	2184	-	*	0.9422	0.8231	2.18	44.18	1.17	31.93	0.63	0.05	1.02	31.74	30.58	0.23	45	35.8	0.1	1.62	0.03	2.21	0.05	0	0.08	1.64	1.95	0	1.79	2.07
cis_mRNA_up10k	4120	NA	LTCONS_00000509	NM_058646.2	NC_003279.8	2786299	2787570	1103	+	NC_003279.8	2791689	2794895	1293	+	*	0.9089	0.7811	2.18	44.18	1.17	31.93	0.63	0.05	1.02	31.74	30.58	0.23	45	35.8	1.11	5.22	0.4	6.51	0.57	0.71	0.44	2.97	4.37	0.4	4.13	5.52
cis_mRNA_up10k	504	NA	LTCONS_00000509	NM_058643.4	NC_003279.8	2786299	2787570	1103	+	NC_003279.8	2784667	2785796	960	-	-495.34	0.9737	0.8601	2.18	44.18	1.17	31.93	0.63	0.05	1.02	31.74	30.58	0.23	45	35.8	4.37	93.67	2.28	87.37	0.83	0.39	1.11	92.86	90.7	0.09	88.57	84.48
tran	NA	NA	LTCONS_00000509	MTCONS_00017155	NC_003279.8	2786299	2787570	1103	+	NC_003281.10	12854082	12855551	1067	-	-527.62	0.9841	0.972	2.18	44.18	1.17	31.93	0.63	0.05	1.02	31.74	30.58	0.23	45	35.8	1.03	26.11	0.8	16.98	0.61	0.17	0.44	23.33	15.88	0.18	30.18	18.58
cis_mRNA_overlap	0	Lnc-AntiCompleteIn-mRNAExon	LTCONS_00000528	MTCONS_00003325	NC_003279.8	2900320	2900533	214	+	NC_003279.8	2881497	2900801	7323	-	-419.2	0.693	0.7239	0	0.46	0	0.21	1	0	0.53	0	0	0	0.23	0	0.22	0.37	0.18	0.3	0.47	0.25	0.53	0.33	0.07	0	0.3	0.37
cis_mRNA_up10k	1520	NA	LTCONS_00000540	NM_001083156.1	NC_003279.8	2984591	2985609	1019	+	NC_003279.8	2981735	2983072	348	-	*	0.638	0.6649	0	0	0.13	0	0.61	0	0.34	0.02	0	0.11	0.02	0.02	37.15	29.32	43.2	32.57	46.49	41.01	39.16	38.2	36.64	44.45	34.91	33.37
cis_mRNA_dw20k	13787	NA	LTCONS_00000541	NM_058684.4	NC_003279.8	2987093	2987678	586	+	NC_003279.8	3001464	3002837	366	-	*	-0.6034	-0.8948	0.05	0	0.31	0	1.45	0.05	0.1	0	0	0	0	0	101.08	143.56	93.16	150.46	86.96	119.82	98.76	155.36	130.37	121.23	149.26	129.86
cis_mRNA_up10k	4022	NA	LTCONS_00000541	NM_001083156.1	NC_003279.8	2987093	2987678	586	+	NC_003279.8	2981735	2983072	348	-	*	0.6009	0.676	0.05	0	0.31	0	1.45	0.05	0.1	0	0	0	0	0	37.15	29.32	43.2	32.57	46.49	41.01	39.16	38.2	36.64	44.45	34.91	33.37
cis_mRNA_dw20k	12592	NA	LTCONS_00000542	NM_058684.4	NC_003279.8	2988223	2988873	651	+	NC_003279.8	3001464	3002837	366	-	*	-0.6657	-0.8318	0.23	0.04	0.09	0	0.82	0.04	0.18	0	0	0.05	0.04	0	101.08	143.56	93.16	150.46	86.96	119.82	98.76	155.36	130.37	121.23	149.26	129.86
cis_mRNA_dw20k	10557	NA	LTCONS_00000543	NM_058684.4	NC_003279.8	2990498	2990908	411	+	NC_003279.8	3001464	3002837	366	-	*	-0.7084	-0.7096	0.44	0	0	0	1	0.08	0.42	0	0	0.26	0	0	101.08	143.56	93.16	150.46	86.96	119.82	98.76	155.36	130.37	121.23	149.26	129.86
cis_mRNA_up10k	7427	NA	LTCONS_00000543	NM_001083156.1	NC_003279.8	2990498	2990908	411	+	NC_003279.8	2981735	2983072	348	-	*	0.6011	0.6394	0.44	0	0	0	1	0.08	0.42	0	0	0.26	0	0	37.15	29.32	43.2	32.57	46.49	41.01	39.16	38.2	36.64	44.45	34.91	33.37
cis_mRNA_up10k	1982	NA	LTCONS_00000557	NM_001026399.7	NC_003279.8	3098187	3099059	873	+	NC_003279.8	3091283	3096206	1521	-	*	-0.7618	-0.7478	0.16	0.17	0.03	0.14	0	0.03	0.06	0.66	0.46	0.03	0.46	0.54	81.13	48.62	105.94	45.24	108.23	79.38	95.25	46.86	46.25	83.84	50.8	47.39
cis_mRNA_up10k	2089	NA	LTCONS_00000571	NM_058717.5	NC_003279.8	3194784	3195224	441	+	NC_003279.8	3176512	3192696	4341	-	*	0.8186	0.7902	0.63	0.07	0.08	0.33	1.14	0	0.45	0.13	0.14	0.55	0.27	0.22	20.26	14.91	17.08	15.14	20.55	15.6	18.51	13.51	15.9	19.33	17.37	16.81
cis_mRNA_overlap	0	Lnc-AntiOverlap-mRNA	LTCONS_00000589	NM_058742.5	NC_003279.8	3327779	3328246	468	+	NC_003279.8	3319853	3330611	1656	-	-511.61	0.786	0.6158	0	0.25	0	0.18	0.56	0	0.07	0.06	0	0	0.13	0	19.83	23.99	20.94	18.32	25.92	16.36	18.9	21.08	18.29	17.31	18.52	15.77
cis_mRNA_dw20k	10667	NA	LTCONS_00000590	NM_171835.4	NC_003279.8	3328422	3329893	1472	+	NC_003279.8	3340559	3349891	2532	-	*	-0.7371	-0.8752	0.03	0.28	0.09	0.32	0.11	0.03	0.1	0.09	0.1	0.02	0.3	0.51	33.9	10.78	31.77	12	29.4	34.38	33.25	13.24	12.68	41.6	10.42	11.37
cis_mRNA_dw20k	12012	NA	LTCONS_00000597	MTCONS_00003412	NC_003279.8	3361757	3362297	415	+	NC_003279.8	3374308	3403139	6845	-	*	-0.7167	-0.7439	11.4	4.59	14.97	8.74	11.89	18.62	10.35	7.74	6.48	13.09	5.99	5.83	0.37	1.53	0	0.44	0	0	0.48	0.84	0.87	0.19	0	0.89
cis_mRNA_dw20k	12012	NA	LTCONS_00000597	MTCONS_00003415	NC_003279.8	3361757	3362297	415	+	NC_003279.8	3374308	3407194	6669	-	*	-0.6568	-0.7106	11.4	4.59	14.97	8.74	11.89	18.62	10.35	7.74	6.48	13.09	5.99	5.83	0	0.35	0	0.63	0	0	0	0.61	1.07	0.15	0.83	0.21
cis_mRNA_dw20k	12803	NA	LTCONS_00000597	NM_001037894.2	NC_003279.8	3361757	3362297	415	+	NC_003279.8	3375099	3402811	5847	-	*	-0.6784	-0.8182	11.4	4.59	14.97	8.74	11.89	18.62	10.35	7.74	6.48	13.09	5.99	5.83	0.97	3.14	0.41	5.18	1.45	0.26	0.67	1.8	1.79	0.69	4.01	2.33
cis_mRNA_dw20k	12803	NA	LTCONS_00000597	NM_001262432.1	NC_003279.8	3361757	3362297	415	+	NC_003279.8	3375099	3386380	2616	-	*	-0.838	-0.8722	11.4	4.59	14.97	8.74	11.89	18.62	10.35	7.74	6.48	13.09	5.99	5.83	2.56	7.94	0	5.1	3.57	0	0.43	1.94	5.03	1.85	7.08	5.7
cis_mRNA_dw20k	14448	NA	LTCONS_00000597	MTCONS_00003424	NC_003279.8	3361757	3362297	415	+	NC_003279.8	3376744	3407194	5107	-	*	-0.8666	-0.9231	11.4	4.59	14.97	8.74	11.89	18.62	10.35	7.74	6.48	13.09	5.99	5.83	2.07	9.09	1.96	5.17	1.29	1.5	2.2	6.86	7.85	1.06	5.75	8.07
cis_mRNA_dw20k	14448	NA	LTCONS_00000597	NM_001262433.1	NC_003279.8	3361757	3362297	415	+	NC_003279.8	3376744	3402811	5247	-	*	-0.6411	-0.6784	11.4	4.59	14.97	8.74	11.89	18.62	10.35	7.74	6.48	13.09	5.99	5.83	0	2.14	0	0.66	0	0	0	0.35	2.67	0	2.91	0
cis_mRNA_dw20k	5472	NA	LTCONS_00000597	NM_058749.4	NC_003279.8	3361757	3362297	415	+	NC_003279.8	3367768	3368550	669	-	*	0.8986	0.8462	11.4	4.59	14.97	8.74	11.89	18.62	10.35	7.74	6.48	13.09	5.99	5.83	479.06	139.19	396.54	160.13	352.22	650.72	400.11	203.55	216.21	581.38	110.42	188.4
cis_mRNA_up10k	6564	NA	LTCONS_00000597	NM_058750.6	NC_003279.8	3361757	3362297	415	+	NC_003279.8	3368860	3371384	1368	+	*	0.8779	0.8322	11.4	4.59	14.97	8.74	11.89	18.62	10.35	7.74	6.48	13.09	5.99	5.83	108.68	67.56	116.35	59.76	95.47	125.56	114.8	69.49	68.31	123.69	61	64.36
cis_mRNA_dw20k	10786	NA	LTCONS_00000599	MTCONS_00003415	NC_003279.8	3362410	3363523	754	+	NC_003279.8	3374308	3407194	6669	-	*	-0.7254	-0.8121	8.02	5.53	8.65	6.41	6.73	10.63	7.89	5.09	5.01	8.77	5.4	5.44	0	0.35	0	0.63	0	0	0	0.61	1.07	0.15	0.83	0.21
cis_mRNA_dw20k	11577	NA	LTCONS_00000599	NM_001037894.2	NC_003279.8	3362410	3363523	754	+	NC_003279.8	3375099	3402811	5847	-	*	-0.6504	-0.7413	8.02	5.53	8.65	6.41	6.73	10.63	7.89	5.09	5.01	8.77	5.4	5.44	0.97	3.14	0.41	5.18	1.45	0.26	0.67	1.8	1.79	0.69	4.01	2.33
cis_mRNA_dw20k	11577	NA	LTCONS_00000599	NM_001262432.1	NC_003279.8	3362410	3363523	754	+	NC_003279.8	3375099	3386380	2616	-	*	-0.7688	-0.6865	8.02	5.53	8.65	6.41	6.73	10.63	7.89	5.09	5.01	8.77	5.4	5.44	2.56	7.94	0	5.1	3.57	0	0.43	1.94	5.03	1.85	7.08	5.7
cis_mRNA_dw20k	13222	NA	LTCONS_00000599	MTCONS_00003424	NC_003279.8	3362410	3363523	754	+	NC_003279.8	3376744	3407194	5107	-	*	-0.8401	-0.8042	8.02	5.53	8.65	6.41	6.73	10.63	7.89	5.09	5.01	8.77	5.4	5.44	2.07	9.09	1.96	5.17	1.29	1.5	2.2	6.86	7.85	1.06	5.75	8.07
cis_mRNA_dw20k	13222	NA	LTCONS_00000599	NM_001262433.1	NC_003279.8	3362410	3363523	754	+	NC_003279.8	3376744	3402811	5247	-	*	-0.6088	-0.7486	8.02	5.53	8.65	6.41	6.73	10.63	7.89	5.09	5.01	8.77	5.4	5.44	0	2.14	0	0.66	0	0	0	0.35	2.67	0	2.91	0
cis_mRNA_dw20k	3024	NA	LTCONS_00000599	NM_058746.4	NC_003279.8	3362410	3363523	754	+	NC_003279.8	3352463	3359387	3684	+	*	-0.6064	-0.6585	8.02	5.53	8.65	6.41	6.73	10.63	7.89	5.09	5.01	8.77	5.4	5.44	0.63	0.75	0.59	0.51	0.83	0.59	0.45	0.94	0.9	0.84	1	0.85
cis_mRNA_dw20k	4246	NA	LTCONS_00000599	NM_058749.4	NC_003279.8	3362410	3363523	754	+	NC_003279.8	3367768	3368550	669	-	*	0.9288	0.7832	8.02	5.53	8.65	6.41	6.73	10.63	7.89	5.09	5.01	8.77	5.4	5.44	479.06	139.19	396.54	160.13	352.22	650.72	400.11	203.55	216.21	581.38	110.42	188.4
cis_mRNA_up10k	5338	NA	LTCONS_00000599	NM_058750.6	NC_003279.8	3362410	3363523	754	+	NC_003279.8	3368860	3371384	1368	+	*	0.9211	0.7832	8.02	5.53	8.65	6.41	6.73	10.63	7.89	5.09	5.01	8.77	5.4	5.44	108.68	67.56	116.35	59.76	95.47	125.56	114.8	69.49	68.31	123.69	61	64.36
tran	NA	NA	LTCONS_00000599	MTCONS_00015587	NC_003279.8	3362410	3363523	754	+	NC_003281.10	4778471	4785331	5252	-	-840.07	0.9281	0.8392	8.02	5.53	8.65	6.41	6.73	10.63	7.89	5.09	5.01	8.77	5.4	5.44	14.69	10.66	13.53	9.2	11.41	17.43	14.59	10.06	10.35	14.71	9.41	10.9
cis_mRNA_dw20k	11584	NA	LTCONS_00000644	NM_182024.5	NC_003279.8	3721676	3722015	340	+	NC_003279.8	3733598	3737450	2091	-	*	0.646	0.7824	0.24	0	0.23	0	0.89	0.11	0.23	0	0	0.35	0	0.11	51.75	31.94	77.95	24.42	65.73	61.2	49.32	40.16	33.93	71.86	25.47	30.1
cis_mRNA_dw20k	12415	NA	LTCONS_00000644	NM_058808.4	NC_003279.8	3721676	3722015	340	+	NC_003279.8	3734429	3740334	2283	-	*	0.6074	0.6878	0.24	0	0.23	0	0.89	0.11	0.23	0	0	0.35	0	0.11	67.21	42.07	64.3	39.93	61.57	63.47	57.56	32.55	38.44	55.31	39.39	38.16
cis_mRNA_overlap	0	Lnc-AntiCompleteIn-mRNAIntron	LTCONS_00000644	MTCONS_00003477	NC_003279.8	3721676	3722015	340	+	NC_003279.8	3713764	3724807	6172	-	*	0.6338	0.8006	0.24	0	0.23	0	0.89	0.11	0.23	0	0	0.35	0	0.11	1.49	0.43	0.98	0.47	1.41	0.63	1.74	0.35	0.46	0.61	0.39	0.72
cis_mRNA_overlap	0	Lnc-AntiOverlap-mRNA	LTCONS_00000644	MTCONS_00003476	NC_003279.8	3721676	3722015	340	+	NC_003279.8	3713764	3721909	4543	-	-484.4	0.8664	0.7461	0.24	0	0.23	0	0.89	0.11	0.23	0	0	0.35	0	0.11	10.03	4.33	9.24	6.33	14.31	7.72	10.05	4.01	4.4	7.44	4.68	3.65
cis_mRNA_up10k	617	NA	LTCONS_00000644	NM_058805.5	NC_003279.8	3721676	3722015	340	+	NC_003279.8	3713764	3721060	3939	-	*	0.8973	0.8043	0.24	0	0.23	0	0.89	0.11	0.23	0	0	0.35	0	0.11	27.05	13.89	24.27	12.32	56.96	13.62	37.23	10.42	14.22	16.68	13.52	13.79
cis_mRNA_up10k	9357	NA	LTCONS_00000644	NM_058807.4	NC_003279.8	3721676	3722015	340	+	NC_003279.8	3731371	3732834	990	+	*	-0.6941	-0.7024	0.24	0	0.23	0	0.89	0.11	0.23	0	0	0.35	0	0.11	1.41	1.17	0.26	1.67	0.31	0.87	1.04	1.1	1.5	0.45	1.84	1.46
cis_mRNA_dw20k	3973	NA	LTCONS_00000657	NM_058813.3	NC_003279.8	3777848	3778411	564	+	NC_003279.8	3769681	3773876	2472	+	*	0.7625	0.7394	0.06	0.15	0.16	0	0.38	0	0.7	0	0.3	0	0.15	0.26	0.63	0.76	0.71	0.83	1.16	0.48	1.03	0.77	1.01	0.54	0.77	0.85
cis_mRNA_dw20k	554	NA	LTCONS_00000657	MTCONS_00000655	NC_003279.8	3777848	3778411	564	+	NC_003279.8	3774715	3777295	1686	+	*	0.6718	0.7532	0.06	0.15	0.16	0	0.38	0	0.7	0	0.3	0	0.15	0.26	0.69	0.14	0.6	0.07	4.22	0.15	2.38	0	0.16	0	0.43	0.15
cis_mRNA_overlap	0	Lnc-AntiOverlap-mRNA	LTCONS_00000657	NM_058815.4	NC_003279.8	3777848	3778411	564	+	NC_003279.8	3778132	3781544	1293	-	*	0.7678	0.7345	0.06	0.15	0.16	0	0.38	0	0.7	0	0.3	0	0.15	0.26	4.22	2.45	4.24	3.03	8.4	1.86	7.35	1.79	3.15	1.95	1.88	2.87
cis_mRNA_dw20k	1336	NA	LTCONS_00000658	NM_170845.4	NC_003279.8	3778630	3779460	831	+	NC_003279.8	3774715	3777295	1386	+	*	0.8876	0.6926	0.24	0	0.17	0	0.2	0.03	0.79	0	0.06	0.07	0.03	0.06	0.47	0.22	0.67	0.28	1.6	0.07	2.21	0.13	0.17	0.24	0	0.21
cis_mRNA_overlap	0	Lnc-AntiOverlap-mRNA	LTCONS_00000658	NM_058815.4	NC_003279.8	3778630	3779460	831	+	NC_003279.8	3778132	3781544	1293	-	-1122.13	0.7341	0.7456	0.24	0	0.17	0	0.2	0.03	0.79	0	0.06	0.07	0.03	0.06	4.22	2.45	4.24	3.03	8.4	1.86	7.35	1.79	3.15	1.95	1.88	2.87
cis_mRNA_dw20k	13741	NA	LTCONS_00000659	MTCONS_00003489	NC_003279.8	3780632	3780888	257	+	NC_003279.8	3794628	3805704	3729	-	*	0.72	0.7068	0	0	0.92	0	0	0.35	0.18	0	0	0	0	0	7.48	5.39	10.8	5.71	6.98	12.12	8.16	6.77	5.52	9.19	5.45	6.09
cis_mRNA_dw20k	10841	NA	LTCONS_00000676	NM_058840.5	NC_003279.8	3864995	3865309	315	+	NC_003279.8	3853853	3854155	246	+	*	-0.7063	-0.7531	0.55	0.23	0.39	0	0.75	0.5	1.41	0.1	0.59	0.65	0.23	0.25	5.06	17.38	5.8	22.9	1.54	4.2	2.41	12.5	17.54	3.37	16.66	18.11
cis_mRNA_dw20k	10857	NA	LTCONS_00000676	NM_001026435.3	NC_003279.8	3864995	3865309	315	+	NC_003279.8	3876165	3876703	447	-	*	0.6295	0.711	0.55	0.23	0.39	0	0.75	0.5	1.41	0.1	0.59	0.65	0.23	0.25	18.88	9.25	17.77	9.55	16.12	25.62	21.83	8.07	9.86	21.58	10.72	14.88
cis_mRNA_dw20k	11585	NA	LTCONS_00000676	MTCONS_00000673	NC_003279.8	3864995	3865309	315	+	NC_003279.8	3847376	3853411	6036	+	*	-0.6064	-0.606	0.55	0.23	0.39	0	0.75	0.5	1.41	0.1	0.59	0.65	0.23	0.25	0.16	3.47	0.09	1.9	0.19	0.03	0.13	2.24	1.99	0.02	3.53	1.84
cis_mRNA_dw20k	6195	NA	LTCONS_00000676	NM_058846.4	NC_003279.8	3864995	3865309	315	+	NC_003279.8	3871503	3873396	927	-	*	-0.6678	-0.662	0.55	0.23	0.39	0	0.75	0.5	1.41	0.1	0.59	0.65	0.23	0.25	1.36	6.5	0.35	7.38	0.36	2.7	0.26	5.05	6.74	1.67	8.63	9.15
cis_mRNA_up10k	2244	NA	LTCONS_00000676	NM_058844.4	NC_003279.8	3864995	3865309	315	+	NC_003279.8	3867552	3868957	1254	+	*	-0.7427	-0.7951	0.55	0.23	0.39	0	0.75	0.5	1.41	0.1	0.59	0.65	0.23	0.25	126.74	157.1	129.48	156	112.04	139.02	115.55	155.46	153.74	149.45	161.03	150.51
cis_mRNA_up10k	3913	NA	LTCONS_00000676	NM_058845.4	NC_003279.8	3864995	3865309	315	+	NC_003279.8	3869221	3870064	696	+	*	0.6978	0.7671	0.55	0.23	0.39	0	0.75	0.5	1.41	0.1	0.59	0.65	0.23	0.25	35.83	19.26	33.54	19.8	34.17	28.2	34.3	18.91	21.02	29.37	22.24	23.16
cis_mRNA_dw20k	5444	NA	LTCONS_00000693	MTCONS_00003554	NC_003279.8	3993551	3993905	355	+	NC_003279.8	3999348	4031746	9441	-	*	0.7597	0.7196	0.45	0	0.53	0.45	0.62	0	0.63	0.09	0.29	0	0.28	0.2	1.69	1.15	1.05	1.47	1.98	0.78	1.86	1.01	1.1	0.71	1.35	1.65
cis_mRNA_up10k	1833	NA	LTCONS_00000693	NM_058882.4	NC_003279.8	3993551	3993905	355	+	NC_003279.8	3995737	3996402	666	+	*	0.7551	0.6349	0.45	0	0.53	0.45	0.62	0	0.63	0.09	0.29	0	0.28	0.2	30.55	4.74	22.89	7.16	51.23	9.08	34.38	3.95	7.12	11.22	4.31	4.95
cis_mRNA_dw20k	19774	NA	LTCONS_00000694	MTCONS_00003561	NC_003279.8	3994170	3994923	754	+	NC_003279.8	4014696	4031746	6109	-	*	0.7723	0.7133	0.76	0.37	0.53	0.26	0.68	0.22	0.71	0.16	0.31	0.75	0.38	0.36	11.03	1.92	8.54	2.26	10.39	7.66	10.91	1.26	2.4	6.18	2.37	2.54
cis_mRNA_dw20k	7671	NA	LTCONS_00000694	NM_001262588.1	NC_003279.8	3994170	3994923	754	+	NC_003279.8	4002593	4031627	6423	-	*	0.7495	0.7552	0.76	0.37	0.53	0.26	0.68	0.22	0.71	0.16	0.31	0.75	0.38	0.36	10.24	4.07	9.36	2.89	15.64	4.26	12.23	2.01	2.91	4.47	3.66	1.36
cis_mRNA_dw20k	7787	NA	LTCONS_00000694	NM_058880.3	NC_003279.8	3994170	3994923	754	+	NC_003279.8	3983205	3986384	2907	+	*	0.7502	0.6643	0.76	0.37	0.53	0.26	0.68	0.22	0.71	0.16	0.31	0.75	0.38	0.36	196.96	143.65	196.05	141.39	246.51	162.21	207.21	143.25	144.91	169.27	142.96	133.78
cis_mRNA_up10k	815	NA	LTCONS_00000694	NM_058882.4	NC_003279.8	3994170	3994923	754	+	NC_003279.8	3995737	3996402	666	+	*	0.738	0.6713	0.76	0.37	0.53	0.26	0.68	0.22	0.71	0.16	0.31	0.75	0.38	0.36	30.55	4.74	22.89	7.16	51.23	9.08	34.38	3.95	7.12	11.22	4.31	4.95
cis_mRNA_up10k	2357	NA	LTCONS_00000697	NM_001262588.1	NC_003279.8	4033983	4034489	507	+	NC_003279.8	4002593	4031627	6423	-	*	0.6884	0.6425	0	0	0	0	0.94	0	0.12	0	0	0.19	0	0	10.24	4.07	9.36	2.89	15.64	4.26	12.23	2.01	2.91	4.47	3.66	1.36
cis_mRNA_dw20k	11317	NA	LTCONS_00000768	MTCONS_00000762	NC_003279.8	4275642	4277464	1485	+	NC_003279.8	4254476	4264326	4821	+	*	-0.7543	-0.8042	0.17	5.65	0.22	2.57	1.48	0.02	1.04	3.66	3.13	0.09	5.44	2.82	10.71	4.96	17.31	3.58	9.8	22.19	7.77	6.44	5.97	20.96	5.18	4.32
cis_mRNA_dw20k	11317	NA	LTCONS_00000768	NM_058939.4	NC_003279.8	4275642	4277464	1485	+	NC_003279.8	4254476	4264326	4815	+	*	-0.748	-0.606	0.17	5.65	0.22	2.57	1.48	0.02	1.04	3.66	3.13	0.09	5.44	2.82	22.44	8.55	23.96	7.73	21.84	14.21	19.29	9.01	7.95	14.65	7.76	7.73
cis_mRNA_dw20k	2630	NA	LTCONS_00000768	NM_058943.5	NC_003279.8	4275642	4277464	1485	+	NC_003279.8	4270735	4273013	1743	+	*	-0.7812	-0.6294	0.17	5.65	0.22	2.57	1.48	0.02	1.04	3.66	3.13	0.09	5.44	2.82	50.5	33.89	54.48	28.97	53.38	50.32	48.64	37.16	29.75	51.06	32.25	27.07
cis_mRNA_dw20k	470	NA	LTCONS_00000768	NM_058946.4	NC_003279.8	4275642	4277464	1485	+	NC_003279.8	4277933	4279576	1278	-	*	0.9694	0.9772	0.17	5.65	0.22	2.57	1.48	0.02	1.04	3.66	3.13	0.09	5.44	2.82	0.12	3.37	0.18	2.01	0.58	0.04	0.24	2.25	2.67	0.04	3.34	2.28
cis_mRNA_dw20k	8469	NA	LTCONS_00000768	NM_058940.5	NC_003279.8	4275642	4277464	1485	+	NC_003279.8	4265109	4267174	1338	+	*	-0.8159	-0.6224	0.17	5.65	0.22	2.57	1.48	0.02	1.04	3.66	3.13	0.09	5.44	2.82	52.09	24.92	73.87	20.78	59.71	58.84	59.89	20.42	21.67	57.43	25.91	23.24
cis_mRNA_dw20k	8469	NA	LTCONS_00000768	NM_181997.1	NC_003279.8	4275642	4277464	1485	+	NC_003279.8	4266568	4267174	552	+	*	-0.7149	-0.6783	0.17	5.65	0.22	2.57	1.48	0.02	1.04	3.66	3.13	0.09	5.44	2.82	49.15	20.76	69.06	21.41	55.97	33.62	40.38	21.37	23.89	47.62	26.16	18.31
cis_mRNA_up10k	5356	NA	LTCONS_00000768	NM_058942.5	NC_003279.8	4275642	4277464	1485	+	NC_003279.8	4268267	4270287	1557	-	*	-0.8979	-0.8951	0.17	5.65	0.22	2.57	1.48	0.02	1.04	3.66	3.13	0.09	5.44	2.82	69.56	29.18	67.63	29.66	64.82	69.69	67.82	32.43	33.13	67.42	28.47	32.57
cis_mRNA_up10k	7676	NA	LTCONS_00000768	NM_058941.3	NC_003279.8	4275642	4277464	1485	+	NC_003279.8	4267330	4267967	543	-	*	0.9105	0.8811	0.17	5.65	0.22	2.57	1.48	0.02	1.04	3.66	3.13	0.09	5.44	2.82	91.58	147.93	95.7	127.83	94.37	91.97	93.05	146.89	127.89	102.64	135.64	117.99
cis_mRNA_up10k	901	NA	LTCONS_00000768	NM_058944.2	NC_003279.8	4275642	4277464	1485	+	NC_003279.8	4273914	4274742	270	-	*	0.7373	0.8846	0.17	5.65	0.22	2.57	1.48	0.02	1.04	3.66	3.13	0.09	5.44	2.82	0	0.59	0.17	0.28	0	0	0	1.6	0.31	0	1.19	0.33
tran	NA	NA	LTCONS_00000768	MTCONS_00025694	NC_003279.8	4275642	4277464	1485	+	NC_003283.11	9482129	9483209	805	+	-369.25	0.834	0.8246	0.17	5.65	0.22	2.57	1.48	0.02	1.04	3.66	3.13	0.09	5.44	2.82	0.28	5.89	0.42	6.59	0.24	0	0.47	7.97	6.59	0	5.73	5.66
tran	NA	NA	LTCONS_00000768	MTCONS_00025695	NC_003279.8	4275642	4277464	1485	+	NC_003283.11	9482136	9483209	755	+	-352.16	0.9269	0.9091	0.17	5.65	0.22	2.57	1.48	0.02	1.04	3.66	3.13	0.09	5.44	2.82	0.69	7.53	0	5.95	0.57	0.07	0.23	5.98	6.07	0.12	6.43	4.61
cis_mRNA_dw20k	10675	NA	LTCONS_00000777	NM_058947.5	NC_003279.8	4312455	4312958	504	+	NC_003279.8	4298626	4301781	864	+	*	0.8758	0.6726	0.13	0.17	0.5	0	0.57	0	0.5	0	0.12	0.13	0.06	0.06	11.89	2.88	13.98	2.58	33.35	4.59	18.95	2.94	3.02	4.2	2.5	2.47
cis_mRNA_dw20k	4490	NA	LTCONS_00000777	MTCONS_00000772	NC_003279.8	4312455	4312958	504	+	NC_003279.8	4298626	4307966	4292	+	*	0.8511	0.6054	0.13	0.17	0.5	0	0.57	0	0.5	0	0.12	0.13	0.06	0.06	1.89	0.53	1.73	0.41	3.06	0.88	3.56	0.54	0.48	0.55	0.32	0.72
cis_mRNA_dw20k	3814	NA	LTCONS_00000802	NM_001262695.1	NC_003279.8	4462484	4463556	338	+	NC_003279.8	4457391	4458671	963	+	*	-0.6448	-0.6434	0.12	1.11	1.14	0.29	0.34	0.22	0.23	1.78	0.31	0.7	1.53	0.11	20.81	4.79	9.04	7.96	22.61	10.31	23.03	4.34	9.3	11.56	5.83	11.2
cis_mRNA_up10k	299	NA	LTCONS_00000802	NM_001306527.1	NC_003279.8	4462484	4463556	338	+	NC_003279.8	4463854	4465756	1083	+	*	0.9286	0.8811	0.12	1.11	1.14	0.29	0.34	0.22	0.23	1.78	0.31	0.7	1.53	0.11	1.13	2.44	1.54	1	1.41	1.45	1.02	2.98	1.26	1.52	2.81	0.76
cis_mRNA_dw20k	12755	NA	LTCONS_00000805	NM_001262695.1	NC_003279.8	4471425	4472290	866	+	NC_003279.8	4457391	4458671	963	+	*	0.8568	0.7174	0.32	0.06	0.22	0.22	0.93	0.28	0.85	0.03	0.06	0.07	0.03	0.03	20.81	4.79	9.04	7.96	22.61	10.31	23.03	4.34	9.3	11.56	5.83	11.2
cis_mRNA_dw20k	16372	NA	LTCONS_00000840	NM_059016.5	NC_003279.8	4664490	4665310	636	+	NC_003279.8	4647424	4648119	600	+	*	-0.8247	-0.7601	0.28	9.01	0.19	3.5	0	0.05	0.14	6.87	3.24	0.19	8.33	3.22	140.56	66.67	139.72	70.68	116.31	159.87	119.36	74.99	72.05	139.07	62.57	67.98
cis_mRNA_dw20k	18866	NA	LTCONS_00000840	NM_059014.2	NC_003279.8	4664490	4665310	636	+	NC_003279.8	4644677	4645625	480	+	*	-0.8715	-0.8581	0.28	9.01	0.19	3.5	0	0.05	0.14	6.87	3.24	0.19	8.33	3.22	14.2	1.81	10.39	3.51	11.79	12.36	15.5	1.61	4.52	11.11	3.3	4.07
cis_mRNA_dw20k	5174	NA	LTCONS_00000840	NM_001262753.1	NC_003279.8	4664490	4665310	636	+	NC_003279.8	4653527	4659317	2247	+	*	-0.7885	-0.7811	0.28	9.01	0.19	3.5	0	0.05	0.14	6.87	3.24	0.19	8.33	3.22	76.61	43.53	110.4	45.37	84.53	76.98	81.09	44.47	44.44	85.56	46.01	44.67
cis_mRNA_dw20k	837	NA	LTCONS_00000840	NM_001025787.2	NC_003279.8	4664490	4665310	636	+	NC_003279.8	4666146	4671714	4080	-	*	-0.7111	-0.6515	0.28	9.01	0.19	3.5	0	0.05	0.14	6.87	3.24	0.19	8.33	3.22	35.75	20.97	44.15	16.75	40.55	29.84	34.13	19.01	16.77	32.81	21.01	17.17
cis_mRNA_up10k	9830	NA	LTCONS_00000840	MTCONS_00000848	NC_003279.8	4664490	4665310	636	+	NC_003279.8	4675139	4683978	4333	+	*	-0.7724	-0.8126	0.28	9.01	0.19	3.5	0	0.05	0.14	6.87	3.24	0.19	8.33	3.22	3.67	1.2	3.79	1.72	1.84	4.22	4.27	1.5	1.81	3.49	1.78	2.07
cis_mRNA_up10k	9830	NA	LTCONS_00000840	MTCONS_00000849	NC_003279.8	4664490	4665310	636	+	NC_003279.8	4675139	4683978	4396	+	*	-0.7506	-0.8878	0.28	9.01	0.19	3.5	0	0.05	0.14	6.87	3.24	0.19	8.33	3.22	0.67	0	1.38	0	1.98	0.47	0.88	0	0.34	1.16	0	0.37
cis_mRNA_up10k	9830	NA	LTCONS_00000840	MTCONS_00000850	NC_003279.8	4664490	4665310	636	+	NC_003279.8	4675139	4683978	5201	+	*	-0.6422	-0.7916	0.28	9.01	0.19	3.5	0	0.05	0.14	6.87	3.24	0.19	8.33	3.22	1.04	0.42	0.67	0.44	1.19	1.07	2.05	0.27	0.51	0.35	0.11	0.68
cis_mRNA_up10k	9830	NA	LTCONS_00000840	NM_001129041.2	NC_003279.8	4664490	4665310	636	+	NC_003279.8	4675139	4678852	1146	+	*	-0.786	-0.676	0.28	9.01	0.19	3.5	0	0.05	0.14	6.87	3.24	0.19	8.33	3.22	37.19	16.23	46.93	16.08	35.82	39.77	29.9	19.39	17.15	46.03	13.77	13.42
cis_mRNA_up10k	6675	NA	LTCONS_00000842	NM_001129040.2	NC_003279.8	4668096	4668465	370	+	NC_003279.8	4675139	4678852	1140	+	*	0.6979	0.7636	0.31	0.26	0.3	0.34	0.49	0.19	0	0.08	0.27	0.61	0.27	0.29	5.49	4.02	6.65	4.34	5.93	3.51	4.2	4.17	4.48	6.5	4.79	4.73
cis_mRNA_dw20k	11648	NA	LTCONS_00000843	MTCONS_00003664	NC_003279.8	4671989	4674750	2762	+	NC_003279.8	4686397	4698582	9061	-	*	0.673	0.6025	0.47	0.4	0.81	0.48	1.12	0.54	1.59	0.28	0.46	0.79	0.52	0.73	28.11	5.48	16.11	7.06	26.36	17.86	27.6	6.28	7.46	16.68	5.48	8.71
cis_mRNA_up10k	390	NA	LTCONS_00000843	MTCONS_00000849	NC_003279.8	4671989	4674750	2762	+	NC_003279.8	4675139	4683978	4396	+	*	0.6614	0.7973	0.47	0.4	0.81	0.48	1.12	0.54	1.59	0.28	0.46	0.79	0.52	0.73	0.67	0	1.38	0	1.98	0.47	0.88	0	0.34	1.16	0	0.37
cis_mRNA_overlap	0	Lnc-AntiOverlap-mRNA	LTCONS_00000865	NM_059039.5	NC_003279.8	4741255	4789589	299	+	NC_003279.8	4738955	4744261	3522	-	*	-0.7211	-0.8652	819.36	815.92	839.02	1193.49	804.21	1027.53	886.15	853.48	998.6	886.4	1022.01	1085.39	31.6	23.38	40.43	18.63	41.83	19.79	25.13	25.35	19.69	24.91	21.69	18.63
cis_mRNA_dw20k	5337	NA	LTCONS_00000868	MTCONS_00003678	NC_003279.8	4764767	4765648	882	+	NC_003279.8	4770984	4773414	1394	-	*	0.8059	0.8542	0.38	0.03	0	0.14	0.72	0	0.22	0	0.17	0.1	0	0.41	16.09	12.09	11.55	12.48	21.81	10.11	19.9	8.35	12.62	9.58	12.38	13.67
cis_mRNA_up10k	2490	NA	LTCONS_00000876	MTCONS_00003678	NC_003279.8	4775903	4776885	983	+	NC_003279.8	4770984	4773414	1394	-	*	0.8343	0.6682	0.19	0	0.03	0.02	0.72	0	0.19	0	0	0	0	0	16.09	12.09	11.55	12.48	21.81	10.11	19.9	8.35	12.62	9.58	12.38	13.67
cis_mRNA_up10k	2880	NA	LTCONS_00000876	MTCONS_00003677	NC_003279.8	4775903	4776885	983	+	NC_003279.8	4768288	4773024	3165	-	*	0.8987	0.6994	0.19	0	0.03	0.02	0.72	0	0.19	0	0	0	0	0	4.19	3.25	4.59	4.43	9.1	4.48	7.16	4.11	4.02	4.07	4.51	4.01
cis_mRNA_up10k	2880	NA	LTCONS_00000876	NM_001262788.1	NC_003279.8	4775903	4776885	983	+	NC_003279.8	4771600	4773024	519	-	*	0.968	0.8636	0.19	0	0.03	0.02	0.72	0	0.19	0	0	0	0	0	2.95	2.2	3.88	3.11	24.47	0	7.28	0.72	2.47	2.79	0.78	2.22
cis_mRNA_dw20k	6722	NA	LTCONS_00000884	NM_059053.4	NC_003279.8	4816146	4816888	743	+	NC_003279.8	4805624	4809425	1182	+	*	-0.8219	-0.7552	1.18	8.45	0.47	9.25	0.69	0.08	0.11	7.34	8.46	0.12	7.29	8.07	76.26	35.92	64.04	55.23	63.81	84.69	75.82	35.4	51.45	84.76	47.45	59.92
cis_mRNA_dw20k	8282	NA	LTCONS_00000884	NM_059056.1	NC_003279.8	4816146	4816888	743	+	NC_003279.8	4825169	4826633	1239	-	*	-0.971	-0.8112	1.18	8.45	0.47	9.25	0.69	0.08	0.11	7.34	8.46	0.12	7.29	8.07	30.21	16.7	33.33	16.14	29.12	30.9	27.84	18.44	18.53	33.65	17.29	17.04
cis_mRNA_overlap	0	Lnc-CompleteIn-mRNAIntron	LTCONS_00000901	MTCONS_00000900	NC_003279.8	4885119	4887128	2010	+	NC_003279.8	4884913	4897619	3829	+	*	0.8043	0.648	0.53	0.43	0.41	0.41	0.6	0.17	0.82	0.22	0.33	0.16	0.35	0.47	4.66	3.56	5.09	3.45	5.75	3.46	6.22	3.13	3.33	3.62	4.43	3.61
cis_mRNA_dw20k	10104	NA	LTCONS_00000925	NM_059093.5	NC_003279.8	4978154	4979597	1444	+	NC_003279.8	4989700	4994579	1971	-	*	0.6403	0.6503	1.05	1.29	1.66	0.92	1.98	0.42	1.45	1.12	1.14	0.52	1.11	1.03	1.69	0.56	0.52	0.23	2.13	0.13	1.16	0.11	0.48	0.28	0.43	0.49
cis_mRNA_dw20k	1024	NA	LTCONS_00000970	NM_059136.1	NC_003279.8	5172324	5172880	557	+	NC_003279.8	5165157	5171301	5277	+	*	0.7348	0.6713	1.25	0.64	0.77	0.53	1.27	1.09	1.04	0.43	0.35	0.69	0.75	0.74	57.84	18.68	55.38	19.8	47.09	51.27	45.1	18.67	21.26	51.5	18.72	23.25
cis_mRNA_dw20k	1121	NA	LTCONS_00000970	NM_059137.3	NC_003279.8	5172324	5172880	557	+	NC_003279.8	5165157	5171204	5175	+	*	0.7345	0.7902	1.25	0.64	0.77	0.53	1.27	1.09	1.04	0.43	0.35	0.69	0.75	0.74	10.99	6.41	9.78	5.4	11.27	9.46	10.51	7.85	6.31	8.99	7.61	3.89
cis_mRNA_dw20k	13858	NA	LTCONS_00000970	NM_059133.2	NC_003279.8	5172324	5172880	557	+	NC_003279.8	5154529	5158467	1008	+	*	0.7762	0.8667	1.25	0.64	0.77	0.53	1.27	1.09	1.04	0.43	0.35	0.69	0.75	0.74	0.4	0.07	0.35	0.19	0.81	0.26	0.79	0.05	0.07	0.17	0.17	0.13
cis_mRNA_overlap	0	Lnc-AntiCompleteIn-mRNAExon	LTCONS_00000970	MTCONS_00003751	NC_003279.8	5172324	5172880	557	+	NC_003279.8	5170088	5175521	4572	-	-1088.1	0.6512	0.6643	1.25	0.64	0.77	0.53	1.27	1.09	1.04	0.43	0.35	0.69	0.75	0.74	49.87	21.45	62.2	21.17	46.35	44.55	43.12	21.02	22.9	47.6	22.45	22.62
cis_mRNA_overlap	0	Lnc-AntiCompleteIn-mRNAExon	LTCONS_00000970	NM_059138.4	NC_003279.8	5172324	5172880	557	+	NC_003279.8	5171494	5175521	3597	-	-1088.1	0.6412	0.6364	1.25	0.64	0.77	0.53	1.27	1.09	1.04	0.43	0.35	0.69	0.75	0.74	148.8	92.85	183.34	85.34	149.73	155.51	132.47	82.65	84.43	161.14	91.54	82.67
cis_mRNA_up10k	3289	NA	LTCONS_00000970	MTCONS_00000972	NC_003279.8	5172324	5172880	557	+	NC_003279.8	5176168	5186333	7048	+	*	0.7359	0.6853	1.25	0.64	0.77	0.53	1.27	1.09	1.04	0.43	0.35	0.69	0.75	0.74	35.19	13.2	35.31	16.53	31.83	37.86	33.51	13.14	16.45	34.39	13.62	17.96
cis_mRNA_up10k	3587	NA	LTCONS_00000970	MTCONS_00000976	NC_003279.8	5172324	5172880	557	+	NC_003279.8	5176466	5186333	6491	+	*	0.7019	0.8462	1.25	0.64	0.77	0.53	1.27	1.09	1.04	0.43	0.35	0.69	0.75	0.74	29.95	7.24	43.33	4.52	28.35	36.7	28.1	5.01	6.05	26.49	8.07	9.86
cis_mRNA_dw20k	10722	NA	LTCONS_00000993	NM_059165.6	NC_003279.8	5305230	5307612	2383	+	NC_003279.8	5318333	5319271	738	-	*	0.9944	0.915	0.03	0.5	0.01	0.39	0.03	0	0.03	0.4	0.37	0	0.53	0.31	0	24.01	0	18	0	0	0	18.76	19.51	0	23.36	16.21
cis_mRNA_overlap	0	Lnc-AntiOverlap-mRNA	LTCONS_00000993	MTCONS_00003784	NC_003279.8	5305230	5307612	2383	+	NC_003279.8	5300981	5313723	6575	-	-3952.79	0.8441	0.8148	0.03	0.5	0.01	0.39	0.03	0	0.03	0.4	0.37	0	0.53	0.31	1.69	5.26	0.39	5.03	1.6	1.07	1.89	2.28	4.63	1.35	3.84	5.04
cis_mRNA_overlap	0	Lnc-AntiOverlap-mRNA	LTCONS_00000993	MTCONS_00003785	NC_003279.8	5305230	5307612	2383	+	NC_003279.8	5300981	5319271	7887	-	-3222.34	-0.9699	-0.8995	0.03	0.5	0.01	0.39	0.03	0	0.03	0.4	0.37	0	0.53	0.31	49.34	15.75	59.74	18.51	55.06	58.75	53.77	18.65	19.94	51.89	16.8	19.45
cis_mRNA_overlap	0	Lnc-AntiOverlap-mRNA	LTCONS_00000993	NM_001276519.1	NC_003279.8	5305230	5307612	2383	+	NC_003279.8	5301768	5313723	5307	-	-3203.78	-0.7888	-0.6032	0.03	0.5	0.01	0.39	0.03	0	0.03	0.4	0.37	0	0.53	0.31	65.44	35.07	65.65	29.87	76.68	37.52	66.33	30.2	33.06	52.41	31.29	28.07
cis_mRNA_overlap	0	Lnc-AntiOverlap-mRNA	LTCONS_00000994	NM_001276519.1	NC_003279.8	5312574	5314193	1620	+	NC_003279.8	5301768	5313723	5307	-	*	0.6153	0.6294	0.56	0.45	0.67	0.35	0.6	0.29	0.63	0.43	0.62	0.38	0.55	0.32	65.44	35.07	65.65	29.87	76.68	37.52	66.33	30.2	33.06	52.41	31.29	28.07
cis_mRNA_up10k	339	NA	LTCONS_00001001	MTCONS_00001003	NC_003279.8	5344504	5345590	1087	+	NC_003279.8	5345928	5349649	2691	+	*	0.6069	0.7183	0.86	0.39	0.58	0.58	0.89	0.75	0.72	0.32	0.58	0.64	0.51	0.83	36.18	14.23	36.03	17.12	28.11	45.06	30.1	11.84	15.83	32.03	14.52	18.34
cis_mRNA_up10k	8779	NA	LTCONS_00001001	NM_182015.1	NC_003279.8	5344504	5345590	1087	+	NC_003279.8	5354368	5356932	1032	+	*	-0.6058	-0.6549	0.86	0.39	0.58	0.58	0.89	0.75	0.72	0.32	0.58	0.64	0.51	0.83	0.8	6.06	2.66	5.99	2.19	0.67	3.47	3.19	2.34	3.54	2.97	2.06
cis_mRNA_dw20k	12314	NA	LTCONS_00001019	NM_059187.5	NC_003279.8	5398848	5400814	1967	+	NC_003279.8	5413127	5415535	1182	-	*	-0.8179	-0.7106	0.09	0.01	0.03	0	0.48	0	0.25	0.03	0	0	0	0	19.25	23.25	13.95	24.46	6.81	22.28	11.01	26.03	25.34	19.4	26.56	30.74
cis_mRNA_dw20k	267	NA	LTCONS_00001019	MTCONS_00003809	NC_003279.8	5398848	5400814	1967	+	NC_003279.8	5401080	5408338	4335	-	*	0.8446	0.7342	0.09	0.01	0.03	0	0.48	0	0.25	0.03	0	0	0	0	0.51	0	0.08	0	2.29	0	0	0.61	0	0	0	0
cis_mRNA_dw20k	1055	NA	LTCONS_00001025	NM_001026248.3	NC_003279.8	5432209	5432935	727	+	NC_003279.8	5430167	5431155	771	+	*	-0.6075	-0.6105	0.36	0.74	0.12	0.69	0.16	0.08	0.19	0	0.36	0.12	0.47	0.34	113.57	34.71	146.86	43.95	116.34	127.02	116.74	39.53	41.57	129.52	35.86	46.23
cis_mRNA_overlap	0	Lnc-AntiCompleteIn-mRNAExon	LTCONS_00001025	NM_059194.4	NC_003279.8	5432209	5432935	727	+	NC_003279.8	5432197	5433051	855	-	-1658.7	0.8262	0.6737	0.36	0.74	0.12	0.69	0.16	0.08	0.19	0	0.36	0.12	0.47	0.34	95.27	1656.48	37.74	1854.72	3	12.06	2.62	185.88	1711.74	22.45	1641.75	1485.48
cis_mRNA_up10k	2404	NA	LTCONS_00001025	NM_001026250.4	NC_003279.8	5432209	5432935	727	+	NC_003279.8	5428777	5429806	687	-	*	0.6824	0.7439	0.36	0.74	0.12	0.69	0.16	0.08	0.19	0	0.36	0.12	0.47	0.34	522.74	702.8	481.65	682.04	527.02	462.87	525.52	648.59	695.29	495.03	685.9	667.51
cis_mRNA_dw20k	18035	NA	LTCONS_00001027	NM_059212.3	NC_003279.8	5485968	5487515	1548	+	NC_003279.8	5505549	5507023	837	-	*	-0.6668	-0.7552	0.62	0.25	0.82	0.31	1.27	0.15	0.8	0.35	0.32	0.21	0.3	0.76	39.2	44.2	43.54	38.41	34.99	44.53	30.54	43.12	39.38	50.69	45.83	37.31
cis_mRNA_up10k	1326	NA	LTCONS_00001027	MTCONS_00003836	NC_003279.8	5485968	5487515	1548	+	NC_003279.8	5472637	5484643	5826	-	*	0.9364	0.831	0.62	0.25	0.82	0.31	1.27	0.15	0.8	0.35	0.32	0.21	0.3	0.76	3.34	1.42	5.13	1.14	6.45	0	5.71	0	0.36	0	0.08	3
cis_mRNA_up10k	1326	NA	LTCONS_00001027	NM_059206.2	NC_003279.8	5485968	5487515	1548	+	NC_003279.8	5479943	5484643	2742	-	*	0.8804	0.7535	0.62	0.25	0.82	0.31	1.27	0.15	0.8	0.35	0.32	0.21	0.3	0.76	0.49	0.31	6.53	1.73	18.44	0	8.07	0	0.19	0	5.63	5.38
cis_mRNA_dw20k	11048	NA	LTCONS_00001046	NM_001318273.1	NC_003279.8	5571203	5572684	1482	+	NC_003279.8	5583731	5593756	1713	-	*	0.6361	0.6923	0.19	0.08	0.26	0.17	0.31	0.24	0.43	0.12	0.1	0.09	0.13	0.03	10.61	3.77	15.92	5.13	11.8	15.21	11.76	5.58	4.4	14.08	6.47	1.28
cis_mRNA_dw20k	11048	NA	LTCONS_00001046	NM_059235.3	NC_003279.8	5571203	5572684	1482	+	NC_003279.8	5583731	5597250	2850	-	*	-0.6425	-0.6084	0.19	0.08	0.26	0.17	0.31	0.24	0.43	0.12	0.1	0.09	0.13	0.03	4.85	14.7	2.09	14.47	4.87	1.44	4.62	13.16	13.17	2.85	14.85	16.54
cis_mRNA_up10k	1127	NA	LTCONS_00001046	MTCONS_00003863	NC_003279.8	5571203	5572684	1482	+	NC_003279.8	5566492	5570077	2048	-	*	-0.6589	-0.662	0.19	0.08	0.26	0.17	0.31	0.24	0.43	0.12	0.1	0.09	0.13	0.03	7.14	28.1	0	25.12	9.48	0	0	18.32	27.41	0	26.34	26.54
cis_mRNA_up10k	1127	NA	LTCONS_00001046	NM_001026404.5	NC_003279.8	5571203	5572684	1482	+	NC_003279.8	5566492	5570077	1635	-	*	-0.6805	-0.6643	0.19	0.08	0.26	0.17	0.31	0.24	0.43	0.12	0.1	0.09	0.13	0.03	1.34	6.77	1.24	10.56	0.49	1.05	0.55	6.69	9.28	0.73	9.01	12.49
cis_mRNA_up10k	1127	NA	LTCONS_00001046	NM_059229.5	NC_003279.8	5571203	5572684	1482	+	NC_003279.8	5568634	5570077	759	-	*	-0.6385	-0.6643	0.19	0.08	0.26	0.17	0.31	0.24	0.43	0.12	0.1	0.09	0.13	0.03	4.26	43.17	5.47	58.07	2.33	8.13	9.36	59.75	45.35	11.47	42.56	45.67
cis_mRNA_dw20k	2541	NA	LTCONS_00001066	NM_059264.4	NC_003279.8	5699228	5699862	635	+	NC_003279.8	5692266	5696688	3654	+	*	0.6639	0.6573	0.29	0.25	0.65	0.08	0.89	0.37	0.18	0	0.3	0.53	0.13	0.35	155.94	106.27	169.81	86.27	153.28	149.27	141.48	112	103.48	159.48	93.59	94.6
cis_mRNA_up10k	7789	NA	LTCONS_00001066	NM_059263.7	NC_003279.8	5699228	5699862	635	+	NC_003279.8	5680366	5691440	4248	-	*	0.6544	0.7483	0.29	0.25	0.65	0.08	0.89	0.37	0.18	0	0.3	0.53	0.13	0.35	103.57	33.24	110.32	35.97	101.84	102.27	96.62	32.87	38.08	100.33	32.83	37.39
cis_mRNA_dw20k	11615	NA	LTCONS_00001114	MTCONS_00001111	NC_003279.8	5978809	5980500	1491	+	NC_003279.8	5964354	5967195	1935	+	*	-0.6923	-0.6829	5.69	4.78	6.66	4.27	5.72	5.76	4.55	5.32	4.35	5.74	4.61	4.22	0	2.38	0	1.38	0.1	0	0	1.29	1.54	0	1.45	1.54
cis_mRNA_dw20k	11927	NA	LTCONS_00001114	MTCONS_00003964	NC_003279.8	5978809	5980500	1491	+	NC_003279.8	5992426	6003637	2566	-	*	-0.8039	-0.7671	5.69	4.78	6.66	4.27	5.72	5.76	4.55	5.32	4.35	5.74	4.61	4.22	1.42	2.61	0.5	2.69	0.89	0.59	1.35	2.83	2.8	1.11	2.32	2.69
cis_mRNA_dw20k	11927	NA	LTCONS_00001114	MTCONS_00003965	NC_003279.8	5978809	5980500	1491	+	NC_003279.8	5992426	6007559	2304	-	*	0.8113	0.7832	5.69	4.78	6.66	4.27	5.72	5.76	4.55	5.32	4.35	5.74	4.61	4.22	12.98	6.08	21.24	4.34	16.11	16.97	15.15	4.8	4.84	15.44	5.37	5.88
cis_mRNA_dw20k	12802	NA	LTCONS_00001114	NM_059333.3	NC_003279.8	5978809	5980500	1491	+	NC_003279.8	5993301	6000774	1179	-	*	0.7935	0.7063	5.69	4.78	6.66	4.27	5.72	5.76	4.55	5.32	4.35	5.74	4.61	4.22	4.54	1.59	9.91	1.33	11.16	4.26	5.43	5.03	1.37	4.85	2.54	0
cis_mRNA_up10k	5490	NA	LTCONS_00001114	NM_001025792.2	NC_003279.8	5978809	5980500	1491	+	NC_003279.8	5967415	5973320	1293	-	*	-0.7242	-0.7483	5.69	4.78	6.66	4.27	5.72	5.76	4.55	5.32	4.35	5.74	4.61	4.22	0.52	1.27	0.96	1.24	0.76	0.87	1.35	1.18	1.17	0.38	1.29	1.7
cis_mRNA_up10k	6001	NA	LTCONS_00001114	MTCONS_00001117	NC_003279.8	5978809	5980500	1491	+	NC_003279.8	5986500	5992628	3624	+	*	0.7534	0.6993	5.69	4.78	6.66	4.27	5.72	5.76	4.55	5.32	4.35	5.74	4.61	4.22	23.89	9.42	28.24	8.1	26.75	20.93	21.7	3.85	9.51	24.69	8.96	7.55
cis_mRNA_up10k	6001	NA	LTCONS_00001114	MTCONS_00001118	NC_003279.8	5978809	5980500	1491	+	NC_003279.8	5986500	5992628	3633	+	*	0.6742	0.6014	5.69	4.78	6.66	4.27	5.72	5.76	4.55	5.32	4.35	5.74	4.61	4.22	23.86	6.13	24.49	7.74	18.42	25.91	24.38	10.43	7.03	18.03	5.81	12.82
cis_mRNA_dw20k	15331	NA	LTCONS_00001136	NM_059363.4	NC_003279.8	6091160	6092966	1807	+	NC_003279.8	6108296	6109647	1122	-	*	-0.7075	-0.7552	0.8	1.33	0.48	1.26	1.02	0.77	1.1	0.78	1.39	0.6	1.06	1.6	19.32	8.5	25.14	6.46	23.3	11.48	16.51	7.53	7.1	22.33	10.08	6.15
cis_mRNA_dw20k	5329	NA	LTCONS_00001136	NM_059353.4	NC_003279.8	6091160	6092966	1807	+	NC_003279.8	6081816	6085832	2448	+	*	0.7827	0.7622	0.8	1.33	0.48	1.26	1.02	0.77	1.1	0.78	1.39	0.6	1.06	1.6	8.43	34.96	2.78	56.89	3.03	5.65	5.24	25.56	48.96	3.79	49.65	58.46
cis_mRNA_up10k	6043	NA	LTCONS_00001136	NM_059359.4	NC_003279.8	6091160	6092966	1807	+	NC_003279.8	6099008	6099672	612	+	*	0.6741	0.6643	0.8	1.33	0.48	1.26	1.02	0.77	1.1	0.78	1.39	0.6	1.06	1.6	13.46	285.42	5.95	275.08	3.78	1.21	3.5	266.99	287.38	0.43	274.52	252.61
cis_mRNA_dw20k	17840	NA	LTCONS_00001144	NM_059368.2	NC_003279.8	6117451	6121377	3927	+	NC_003279.8	6139216	6140444	759	-	*	0.704	0.7785	0.15	0.35	0.15	0.22	0.35	0.17	0.2	0.33	0.32	0.07	0.4	0.36	0	0.03	0	0	0	0	0	0.03	0	0	0.07	0.04
cis_mRNA_up10k	1214	NA	LTCONS_00001144	MTCONS_00001148	NC_003279.8	6117451	6121377	3927	+	NC_003279.8	6122590	6126532	1830	+	*	-0.6752	-0.6947	0.15	0.35	0.15	0.22	0.35	0.17	0.2	0.33	0.32	0.07	0.4	0.36	10.09	6.79	10.56	8.78	7.63	13.93	9.11	9.23	7.72	10.84	7.87	9.77
cis_mRNA_up10k	1774	NA	LTCONS_00001144	NM_059365.4	NC_003279.8	6117451	6121377	3927	+	NC_003279.8	6123150	6126532	1701	+	*	0.7826	0.7579	0.15	0.35	0.15	0.22	0.35	0.17	0.2	0.33	0.32	0.07	0.4	0.36	29.66	44.21	23.98	45.84	29.9	17.69	24.67	39.66	44.2	20.36	48.86	43.5
cis_mRNA_dw20k	7506	NA	LTCONS_00001145	NM_059364.5	NC_003279.8	6121827	6122343	517	+	NC_003279.8	6110139	6114322	2370	+	*	-0.7256	-0.641	0.13	0.38	0.43	0.9	0.61	0.3	0.3	0.73	0.84	0.32	0.88	0.76	105.65	69.62	115.96	67.51	108.42	106.23	98.76	69	68.86	103.71	73.6	68.51
cis_mRNA_up10k	808	NA	LTCONS_00001145	NM_059365.4	NC_003279.8	6121827	6122343	517	+	NC_003279.8	6123150	6126532	1701	+	*	0.7786	0.7741	0.13	0.38	0.43	0.9	0.61	0.3	0.3	0.73	0.84	0.32	0.88	0.76	29.66	44.21	23.98	45.84	29.9	17.69	24.67	39.66	44.2	20.36	48.86	43.5
cis_mRNA_dw20k	19015	NA	LTCONS_00001182	NM_059402.4	NC_003279.8	6223523	6230596	2934	+	NC_003279.8	6249610	6250042	357	-	*	0.6838	0.7273	3.62	2.55	3.3	2.03	6.09	2.34	4.42	2.28	2.51	2.62	2.49	2.63	94.69	16.18	59.38	24.9	80.73	60.61	115.27	14.94	23.2	75.13	21.47	25.66
cis_mRNA_dw20k	3687	NA	LTCONS_00001182	NM_059392.3	NC_003279.8	6223523	6230596	2934	+	NC_003279.8	6215791	6219837	2778	+	*	-0.6231	-0.7145	3.62	2.55	3.3	2.03	6.09	2.34	4.42	2.28	2.51	2.62	2.49	2.63	9.27	12.76	7.15	14.89	7.46	8.55	8.23	16.6	14.51	8.99	10.73	12.76
cis_mRNA_up10k	2182	NA	LTCONS_00001182	NM_059399.1	NC_003279.8	6223523	6230596	2934	+	NC_003279.8	6232777	6234280	966	+	*	0.7328	0.7267	3.62	2.55	3.3	2.03	6.09	2.34	4.42	2.28	2.51	2.62	2.49	2.63	0.31	0.05	0.36	0.07	0.28	0	0.39	0	0.1	0	0.08	0.08
cis_mRNA_up10k	2774	NA	LTCONS_00001182	NM_059394.5	NC_003279.8	6223523	6230596	2934	+	NC_003279.8	6220149	6220750	393	-	*	-0.6272	-0.8252	3.62	2.55	3.3	2.03	6.09	2.34	4.42	2.28	2.51	2.62	2.49	2.63	508.63	920.78	606.44	1028.26	617.95	633.23	584.35	1049.03	915.96	679.68	937.03	848.98
tran	NA	NA	LTCONS_00001182	MTCONS_00031249	NC_003279.8	6223523	6230596	2934	+	NC_003283.11	15593462	15602345	6780	-	-1007.63	0.8623	0.7692	3.62	2.55	3.3	2.03	6.09	2.34	4.42	2.28	2.51	2.62	2.49	2.63	1.39	0.43	0.69	0.39	1.6	0.59	1.9	0.44	0.56	0.49	0.74	0.7
tran	NA	NA	LTCONS_00001182	MTCONS_00031250	NC_003279.8	6223523	6230596	2934	+	NC_003283.11	15593462	15602345	5222	-	-1007.63	0.675	0.7628	3.62	2.55	3.3	2.03	6.09	2.34	4.42	2.28	2.51	2.62	2.49	2.63	0.31	0	0.11	0	0.22	0.05	0.05	0	0	0.03	0	0.02
cis_mRNA_up10k	5264	NA	LTCONS_00001194	NM_059412.4	NC_003279.8	6279004	6279745	742	+	NC_003279.8	6285008	6287600	1017	+	*	0.8029	0.634	0.19	0.24	0.54	0.13	0.66	0.15	0.34	0	0.21	0.04	0	0.07	482.17	168.53	538.16	155.09	699.67	327.26	549.09	170.38	166.15	357.34	157.04	148.57
cis_mRNA_dw20k	16110	NA	LTCONS_00001195	NM_059407.4	NC_003279.8	6280378	6281790	1413	+	NC_003279.8	6260263	6264269	525	+	*	-0.7059	-0.8662	0.29	0.05	0.56	0.03	0.74	0.11	0.75	0	0.08	0.13	0.03	0.03	12.98	39.83	5.01	35	7.23	9.71	9.25	63.96	37.04	8.43	37.16	43.12
cis_mRNA_up10k	3219	NA	LTCONS_00001195	NM_059412.4	NC_003279.8	6280378	6281790	1413	+	NC_003279.8	6285008	6287600	1017	+	*	0.9326	0.8733	0.29	0.05	0.56	0.03	0.74	0.11	0.75	0	0.08	0.13	0.03	0.03	482.17	168.53	538.16	155.09	699.67	327.26	549.09	170.38	166.15	357.34	157.04	148.57
cis_mRNA_up10k	5140	NA	LTCONS_00001195	NM_059411.3	NC_003279.8	6280378	6281790	1413	+	NC_003279.8	6274575	6275239	612	-	*	-0.7106	-0.7113	0.29	0.05	0.56	0.03	0.74	0.11	0.75	0	0.08	0.13	0.03	0.03	4.76	112.74	2.97	95.36	2.1	0.67	1.58	104.34	97.93	0.54	102.7	83.74
cis_mRNA_up10k	6728	NA	LTCONS_00001195	NM_059410.4	NC_003279.8	6280378	6281790	1413	+	NC_003279.8	6272013	6273651	1317	-	*	-0.7171	-0.6972	0.29	0.05	0.56	0.03	0.74	0.11	0.75	0	0.08	0.13	0.03	0.03	3.37	72.78	2.18	80.16	0.6	0.29	0.39	73.24	78.31	0.12	70.93	74.23
cis_mRNA_up10k	1169	NA	LTCONS_00001196	NM_059412.4	NC_003279.8	6283575	6283840	266	+	NC_003279.8	6285008	6287600	1017	+	*	0.77	0.7413	3.96	2.13	3.97	1.72	5.69	1.33	8.65	2.32	1.26	1.04	1.98	0.84	482.17	168.53	538.16	155.09	699.67	327.26	549.09	170.38	166.15	357.34	157.04	148.57
cis_mRNA_dw20k	11933	NA	LTCONS_00001221	MTCONS_00001215	NC_003279.8	6332275	6338098	5824	+	NC_003279.8	6317717	6320343	1814	+	*	-0.634	-0.7916	0.12	0.47	0.1	0.67	0.12	0.08	0.09	0.15	0.59	0.01	0.39	0.86	102.39	71.52	103.7	70.06	83.66	124.25	104.23	73.39	75.61	113.42	71.16	86.47
cis_mRNA_dw20k	15207	NA	LTCONS_00001221	NM_059423.5	NC_003279.8	6332275	6338098	5824	+	NC_003279.8	6315247	6317069	1596	+	*	-0.7692	-0.7776	0.12	0.47	0.1	0.67	0.12	0.08	0.09	0.15	0.59	0.01	0.39	0.86	510.12	213.09	525.3	253.88	421.84	571.8	456.07	238.55	256.58	577.34	211.43	240.2
cis_mRNA_dw20k	18615	NA	LTCONS_00001221	NM_059433.7	NC_003279.8	6332275	6338098	5824	+	NC_003279.8	6356712	6358395	1326	-	*	-0.7729	-0.7566	0.12	0.47	0.1	0.67	0.12	0.08	0.09	0.15	0.59	0.01	0.39	0.86	74.05	19.84	76.96	21.36	58.46	85.47	67.17	21.11	24.51	83.04	20.65	25.51
cis_mRNA_dw20k	19938	NA	LTCONS_00001221	NM_059421.3	NC_003279.8	6332275	6338098	5824	+	NC_003279.8	6311278	6312338	870	+	*	0.9226	0.9527	0.12	0.47	0.1	0.67	0.12	0.08	0.09	0.15	0.59	0.01	0.39	0.86	2.69	32.58	0.95	43.28	0.51	0.47	0.19	7.18	41.62	0.1	32.73	34.11
cis_mRNA_dw20k	2150	NA	LTCONS_00001221	NM_001263250.1	NC_003279.8	6332275	6338098	5824	+	NC_003279.8	6329602	6330126	480	+	*	0.8113	0.8757	0.12	0.47	0.1	0.67	0.12	0.08	0.09	0.15	0.59	0.01	0.39	0.86	7.41	168.11	2.77	195.6	2.69	0.33	2.48	198.57	204.72	0	166.07	190.26
cis_mRNA_dw20k	4323	NA	LTCONS_00001221	NM_059426.4	NC_003279.8	6332275	6338098	5824	+	NC_003279.8	6326875	6327953	534	+	*	0.7349	0.8053	0.12	0.47	0.1	0.67	0.12	0.08	0.09	0.15	0.59	0.01	0.39	0.86	0.42	3.34	0.29	2.95	0.06	0.06	0.12	3.55	2.52	0	5.14	4.12
cis_mRNA_up10k	4111	NA	LTCONS_00001221	MTCONS_00001223	NC_003279.8	6332275	6338098	5824	+	NC_003279.8	6342208	6348476	2337	+	*	-0.6131	-0.697	0.12	0.47	0.1	0.67	0.12	0.08	0.09	0.15	0.59	0.01	0.39	0.86	96.64	57.63	105.08	67.94	96.8	104.99	106.5	48.8	66.63	98.78	63.28	73.49
cis_mRNA_up10k	4340	NA	LTCONS_00001221	NM_001026370.3	NC_003279.8	6332275	6338098	5824	+	NC_003279.8	6342437	6353581	2193	+	*	0.6187	0.8105	0.12	0.47	0.1	0.67	0.12	0.08	0.09	0.15	0.59	0.01	0.39	0.86	0.48	2.15	0.46	2.62	0.99	0.21	0.41	2.62	1.69	0.12	2.41	1.45
cis_mRNA_up10k	4340	NA	LTCONS_00001221	NM_001026372.5	NC_003279.8	6332275	6338098	5824	+	NC_003279.8	6342437	6356458	2829	+	*	-0.7483	-0.683	0.12	0.47	0.1	0.67	0.12	0.08	0.09	0.15	0.59	0.01	0.39	0.86	59.73	28.33	80.58	29.28	73.19	59.19	68.17	24.93	30.7	67.3	33.59	30.09
cis_mRNA_up10k	4340	NA	LTCONS_00001221	NM_001316849.1	NC_003279.8	6332275	6338098	5824	+	NC_003279.8	6342437	6347209	2208	+	*	0.8676	0.7706	0.12	0.47	0.1	0.67	0.12	0.08	0.09	0.15	0.59	0.01	0.39	0.86	7.32	65.36	6.51	73.15	6.33	5.61	8.33	35.73	69.4	11.35	61.47	55.57
cis_mRNA_up10k	4340	NA	LTCONS_00001221	NM_001316851.1	NC_003279.8	6332275	6338098	5824	+	NC_003279.8	6342437	6349773	2151	+	*	0.7989	0.7671	0.12	0.47	0.1	0.67	0.12	0.08	0.09	0.15	0.59	0.01	0.39	0.86	1	4.83	1.14	3.16	1.94	1.11	1.44	2.99	4.67	1.39	4.35	4.11
cis_mRNA_up10k	384	NA	LTCONS_00001222	NM_001026373.4	NC_003279.8	6340098	6342054	1957	+	NC_003279.8	6342437	6346727	2175	+	*	0.6649	0.7273	0.66	1.21	1.32	1.4	0.98	0.69	1.55	0.56	1.2	0.61	0.84	1.23	0.12	0.32	0.18	0.29	0.07	0.22	0.24	0.11	0.16	0	0.17	0.26
cis_mRNA_dw20k	11721	NA	LTCONS_00001285	NM_059491.4	NC_003279.8	6575255	6579593	4339	+	NC_003279.8	6562707	6563535	612	+	*	0.6453	0.6014	0.65	1.01	0.46	0.74	0.6	0.36	0.85	0.64	0.91	0.4	0.9	1.24	31.59	36.6	27.2	33.25	25.86	33.6	29.94	25.56	36.37	31.96	41.12	40.12
cis_mRNA_dw20k	12957	NA	LTCONS_00001285	NM_059490.2	NC_003279.8	6575255	6579593	4339	+	NC_003279.8	6558700	6562299	2463	+	*	-0.6507	-0.6573	0.65	1.01	0.46	0.74	0.6	0.36	0.85	0.64	0.91	0.4	0.9	1.24	24.43	10.84	30.13	8.05	28.54	18.51	20.93	9.29	7.97	21.57	9.68	7.48
cis_mRNA_dw20k	16925	NA	LTCONS_00001285	NM_059489.6	NC_003279.8	6575255	6579593	4339	+	NC_003279.8	6554901	6558331	1704	+	*	-0.7111	-0.7203	0.65	1.01	0.46	0.74	0.6	0.36	0.85	0.64	0.91	0.4	0.9	1.24	49.89	25.34	43.98	31.68	39.51	55.96	42.68	26.82	31.02	53.14	25.42	32.73
cis_mRNA_dw20k	6490	NA	LTCONS_00001285	NM_059494.4	NC_003279.8	6575255	6579593	4339	+	NC_003279.8	6566173	6568766	2076	+	*	-0.7259	-0.7483	0.65	1.01	0.46	0.74	0.6	0.36	0.85	0.64	0.91	0.4	0.9	1.24	52.87	23.21	63.68	21.48	53.47	54.89	49.3	24.06	22.12	54.4	23.79	25.19
cis_mRNA_up10k	5712	NA	LTCONS_00001285	NM_059497.3	NC_003279.8	6575255	6579593	4339	+	NC_003279.8	6585304	6587882	1032	+	*	0.7667	0.7552	0.65	1.01	0.46	0.74	0.6	0.36	0.85	0.64	0.91	0.4	0.9	1.24	0.18	1.02	0.27	0.85	0.33	0.07	0.22	0.53	0.56	0	1.05	0.84
cis_mRNA_up10k	646	NA	LTCONS_00001285	MTCONS_00001287	NC_003279.8	6575255	6579593	4339	+	NC_003279.8	6580238	6587906	3915	+	*	0.7178	0.6853	0.65	1.01	0.46	0.74	0.6	0.36	0.85	0.64	0.91	0.4	0.9	1.24	0.4	3.72	0.83	2.82	1.08	0.5	1.01	3.99	2.94	0.38	2.86	3.58
cis_mRNA_up10k	9406	NA	LTCONS_00001285	NM_059493.6	NC_003279.8	6575255	6579593	4339	+	NC_003279.8	6564868	6565850	843	-	*	-0.7313	-0.7203	0.65	1.01	0.46	0.74	0.6	0.36	0.85	0.64	0.91	0.4	0.9	1.24	235.86	71.68	263.31	94.68	228.07	281.04	245.21	82.19	101.77	271.24	74.28	100.49
cis_mRNA_dw20k	13602	NA	LTCONS_00001307	NM_059523.4	NC_003279.8	6705715	6706020	306	+	NC_003279.8	6719621	6721046	1068	-	*	-0.7605	-0.7427	0	0.12	0	0.79	0	0	0	1.31	0.62	0	0.72	1.44	98.8	43.18	112.77	48.69	94.11	110.37	104.3	45.19	52.17	104.68	46.13	53.6
cis_mRNA_overlap	0	Lnc-AntiCompleteIn-mRNAExon	LTCONS_00001307	NM_059518.3	NC_003279.8	6705715	6706020	306	+	NC_003279.8	6705632	6706358	636	-	-575.6	0.7579	0.7781	0	0.12	0	0.79	0	0	0	1.31	0.62	0	0.72	1.44	0.33	7.73	0	4.89	0.14	0	0.05	8.96	5.71	0	6.43	5.38
cis_mRNA_up10k	9977	NA	LTCONS_00001307	MTCONS_00001311	NC_003279.8	6705715	6706020	306	+	NC_003279.8	6715996	6719186	2483	+	*	-0.6186	-0.8025	0	0.12	0	0.79	0	0	0	1.31	0.62	0	0.72	1.44	34.3	13.08	34.37	12.76	53.8	22.83	54.66	9.77	14.92	21.91	14.02	17.18
tran	NA	NA	LTCONS_00001307	NM_068288.3	NC_003279.8	6705715	6706020	306	+	NC_003282.8	4977276	4977995	633	+	-501.1	0.7384	0.7726	0	0.12	0	0.79	0	0	0	1.31	0.62	0	0.72	1.44	1	24.15	0.23	16.02	0.19	0.05	0.28	30.66	15.79	0.1	17.96	14.34
cis_mRNA_up10k	1282	NA	LTCONS_00001308	NM_059519.4	NC_003279.8	6709910	6711181	1160	+	NC_003279.8	6706812	6708629	1002	-	*	0.946	0.7251	0.41	0.02	0.11	0	0.46	0.09	0.78	0	0	0	0	0.06	1.4	0.77	0.75	0.5	2.52	0.16	4.85	0.26	0.47	0.56	0.25	0.94
cis_mRNA_up10k	4816	NA	LTCONS_00001308	MTCONS_00001311	NC_003279.8	6709910	6711181	1160	+	NC_003279.8	6715996	6719186	2483	+	*	0.9123	0.8629	0.41	0.02	0.11	0	0.46	0.09	0.78	0	0	0	0	0.06	34.3	13.08	34.37	12.76	53.8	22.83	54.66	9.77	14.92	21.91	14.02	17.18
cis_mRNA_dw20k	10067	NA	LTCONS_00001314	NM_059528.6	NC_003279.8	6723425	6724116	573	+	NC_003279.8	6734182	6736152	1650	-	*	0.9169	0.7972	95.8	41.86	109.92	36.11	90.5	113.54	107.7	34.97	43.89	101.49	37.48	44.81	21.93	9	16.72	9.87	17.81	17.53	19.22	8.94	10.85	17.13	10.81	10.88
cis_mRNA_dw20k	18409	NA	LTCONS_00001314	NM_059531.6	NC_003279.8	6723425	6724116	573	+	NC_003279.8	6742524	6745324	1839	-	*	0.9555	0.7203	95.8	41.86	109.92	36.11	90.5	113.54	107.7	34.97	43.89	101.49	37.48	44.81	115.05	28.46	103.38	33.3	109.07	94.83	109.61	29.39	32.66	93	28.44	32.91
cis_mRNA_dw20k	4240	NA	LTCONS_00001314	MTCONS_00001311	NC_003279.8	6723425	6724116	573	+	NC_003279.8	6715996	6719186	2483	+	*	0.7269	0.8462	95.8	41.86	109.92	36.11	90.5	113.54	107.7	34.97	43.89	101.49	37.48	44.81	34.3	13.08	34.37	12.76	53.8	22.83	54.66	9.77	14.92	21.91	14.02	17.18
cis_mRNA_dw20k	4290	NA	LTCONS_00001314	NM_059525.4	NC_003279.8	6723425	6724116	573	+	NC_003279.8	6728405	6729366	408	-	*	-0.9424	-0.7902	95.8	41.86	109.92	36.11	90.5	113.54	107.7	34.97	43.89	101.49	37.48	44.81	202.14	784.58	109.97	936.17	123.19	99.98	146.23	524.1	827.47	132.69	796.98	808.78
cis_mRNA_dw20k	7215	NA	LTCONS_00001314	NM_059527.3	NC_003279.8	6723425	6724116	573	+	NC_003279.8	6731330	6732269	411	-	*	-0.9693	-0.7483	95.8	41.86	109.92	36.11	90.5	113.54	107.7	34.97	43.89	101.49	37.48	44.81	6.98	42.75	3.71	43.42	2.85	4.56	2.86	35.84	39.75	4.25	34.27	35.18
cis_mRNA_up10k	2380	NA	LTCONS_00001314	NM_059523.4	NC_003279.8	6723425	6724116	573	+	NC_003279.8	6719621	6721046	1068	-	*	0.9948	0.9371	95.8	41.86	109.92	36.11	90.5	113.54	107.7	34.97	43.89	101.49	37.48	44.81	98.8	43.18	112.77	48.69	94.11	110.37	104.3	45.19	52.17	104.68	46.13	53.6
tran	4679310	NA	LTCONS_00001314	MTCONS_00003192	NC_003279.8	6723425	6724116	573	+	NC_003279.8	2036946	2044116	4147	-	-248.86	0.6856	0.6853	95.8	41.86	109.92	36.11	90.5	113.54	107.7	34.97	43.89	101.49	37.48	44.81	11.96	2.34	8.76	1.65	20.64	4.87	15.19	1.9	2	6.67	2.06	1.89
tran	NA	NA	LTCONS_00001314	MTCONS_00010042	NC_003279.8	6723425	6724116	573	+	NC_003280.10	5346557	5350546	3243	-	-406.93	0.8801	0.7692	95.8	41.86	109.92	36.11	90.5	113.54	107.7	34.97	43.89	101.49	37.48	44.81	4.2	3.03	4.64	2.68	4.49	3.91	4.59	2.75	2.18	3.88	3.35	2.98
tran	NA	NA	LTCONS_00001314	MTCONS_00010043	NC_003279.8	6723425	6724116	573	+	NC_003280.10	5346557	5350546	3301	-	-406.93	0.6435	0.7483	95.8	41.86	109.92	36.11	90.5	113.54	107.7	34.97	43.89	101.49	37.48	44.81	1.95	1.27	1.75	0.78	0.98	1.72	1.44	0.92	1.24	0.97	0.95	1.16
cis_mRNA_dw20k	8246	NA	LTCONS_00001323	NM_059542.2	NC_003279.8	6779365	6779838	474	+	NC_003279.8	6788083	6788986	735	-	*	0.7701	0.7321	0.14	0	0.55	0.12	0.21	0.27	0.75	0.06	0.19	0.07	0.12	0.33	6.1	3.82	9.41	3.86	7.14	6.47	7.98	3.41	3.2	4.95	5.31	5.14
cis_mRNA_dw20k	10642	NA	LTCONS_00001328	NM_059541.3	NC_003279.8	6797711	6798571	861	+	NC_003279.8	6784908	6787070	1329	+	*	-0.8428	-0.8511	11.04	3.1	9.3	3.62	7.27	15.25	14.51	2.97	4.94	8.78	4.19	6.39	0.7	12.06	0.7	10.45	0.37	0.12	0.58	10.63	9.34	0.23	11.77	10.33
cis_mRNA_dw20k	13832	NA	LTCONS_00001328	NM_001025856.3	NC_003279.8	6797711	6798571	861	+	NC_003279.8	6780821	6783880	1575	+	*	0.8382	0.8252	11.04	3.1	9.3	3.62	7.27	15.25	14.51	2.97	4.94	8.78	4.19	6.39	84.37	37.54	96.48	37.64	75.66	96.42	74.74	40	40.07	85.24	34.15	43.87
cis_mRNA_dw20k	384	NA	LTCONS_00001328	NM_059544.4	NC_003279.8	6797711	6798571	861	+	NC_003279.8	6791025	6797328	3765	+	*	0.8317	0.7692	11.04	3.1	9.3	3.62	7.27	15.25	14.51	2.97	4.94	8.78	4.19	6.39	87.27	43.36	92.52	39.06	85.32	94.52	84.73	51.28	45.34	90.53	37.47	45.18
cis_mRNA_overlap	0	Lnc-AntiOverlap-mRNA	LTCONS_00001328	NM_059545.3	NC_003279.8	6797711	6798571	861	+	NC_003279.8	6798270	6799577	1011	-	*	0.806	0.6993	11.04	3.1	9.3	3.62	7.27	15.25	14.51	2.97	4.94	8.78	4.19	6.39	15.07	9.11	16.02	6.43	16.31	17.57	14.29	9.01	8.63	16.33	7.66	8.89
cis_mRNA_up10k	1854	NA	LTCONS_00001328	MTCONS_00001332	NC_003279.8	6797711	6798571	861	+	NC_003279.8	6800424	6806756	4737	+	*	0.7891	0.7972	11.04	3.1	9.3	3.62	7.27	15.25	14.51	2.97	4.94	8.78	4.19	6.39	5.43	3.23	5.61	3.67	5.64	6.91	4.84	4.05	3.75	4.63	4.53	3.84
cis_mRNA_up10k	7976	NA	LTCONS_00001328	NM_059543.5	NC_003279.8	6797711	6798571	861	+	NC_003279.8	6789162	6789736	324	-	*	-0.8487	-0.9021	11.04	3.1	9.3	3.62	7.27	15.25	14.51	2.97	4.94	8.78	4.19	6.39	165.85	332.33	204.66	359.14	212.95	192.09	224.61	369.46	315.46	234.24	333.33	322.43
cis_mRNA_up10k	8726	NA	LTCONS_00001328	NM_059542.2	NC_003279.8	6797711	6798571	861	+	NC_003279.8	6788083	6788986	735	-	*	0.6956	0.7622	11.04	3.1	9.3	3.62	7.27	15.25	14.51	2.97	4.94	8.78	4.19	6.39	6.1	3.82	9.41	3.86	7.14	6.47	7.98	3.41	3.2	4.95	5.31	5.14
cis_mRNA_dw20k	11079	NA	LTCONS_00001348	NM_059560.3	NC_003279.8	6862227	6872096	2182	+	NC_003279.8	6850424	6851149	636	+	*	-0.9382	-0.7531	0.89	3.87	0.29	3.94	0.42	0.51	0.27	2.6	4.1	0.29	3.97	4	175.64	132.64	188.5	134.11	171.42	175.76	171.11	129.89	134	198	126.88	128.27
cis_mRNA_dw20k	12448	NA	LTCONS_00001348	NM_059559.4	NC_003279.8	6862227	6872096	2182	+	NC_003279.8	6847594	6849780	1818	+	*	-0.9343	-0.8056	0.89	3.87	0.29	3.94	0.42	0.51	0.27	2.6	4.1	0.29	3.97	4	78.34	49.12	96.32	45.72	76.63	85.27	68.35	53.97	47.28	84.14	47.03	44.66
cis_mRNA_dw20k	17136	NA	LTCONS_00001348	NM_059557.6	NC_003279.8	6862227	6872096	2182	+	NC_003279.8	6843623	6845092	969	+	*	-0.6582	-0.7417	0.89	3.87	0.29	3.94	0.42	0.51	0.27	2.6	4.1	0.29	3.97	4	106.09	0.15	45.44	0.07	52.59	11.13	55.83	0.07	0.15	11.58	0.18	0.05
cis_mRNA_dw20k	19128	NA	LTCONS_00001348	NM_059555.1	NC_003279.8	6862227	6872096	2182	+	NC_003279.8	6838354	6843100	2796	+	*	-0.9587	-0.662	0.89	3.87	0.29	3.94	0.42	0.51	0.27	2.6	4.1	0.29	3.97	4	82.73	29.37	83.61	29.7	74.1	89.35	74.01	34.54	35.51	83.92	30.19	33.98
cis_mRNA_dw20k	19128	NA	LTCONS_00001348	NM_059556.3	NC_003279.8	6862227	6872096	2182	+	NC_003279.8	6838354	6843100	2784	+	*	-0.8849	-0.7496	0.89	3.87	0.29	3.94	0.42	0.51	0.27	2.6	4.1	0.29	3.97	4	82.33	47.5	84.12	49.04	94.94	71.62	89.55	38.49	47.09	73.04	49.67	50.68
cis_mRNA_dw20k	4835	NA	LTCONS_00001348	NM_059562.5	NC_003279.8	6862227	6872096	2182	+	NC_003279.8	6854812	6857393	2292	+	*	0.8164	0.6725	0.89	3.87	0.29	3.94	0.42	0.51	0.27	2.6	4.1	0.29	3.97	4	122.68	221.48	150.98	178.62	130.96	119.7	111.7	224.04	179.06	127.63	208.78	173.39
cis_mRNA_dw20k	5645	NA	LTCONS_00001348	NM_001263411.1	NC_003279.8	6862227	6872096	2182	+	NC_003279.8	6877740	6888217	1461	-	*	0.917	0.8722	0.89	3.87	0.29	3.94	0.42	0.51	0.27	2.6	4.1	0.29	3.97	4	4.51	6.56	2.4	6.01	0	1.98	2.17	4.32	8.98	1.21	6.33	7.65
cis_mRNA_dw20k	673	NA	LTCONS_00001348	NM_059564.4	NC_003279.8	6862227	6872096	2182	+	NC_003279.8	6872768	6873684	825	-	*	0.9583	0.718	0.89	3.87	0.29	3.94	0.42	0.51	0.27	2.6	4.1	0.29	3.97	4	2.66	52.09	1.08	45.13	1.16	0.33	0.73	50.92	43	0.11	48.65	46.82
cis_mRNA_dw20k	6881	NA	LTCONS_00001348	NM_001026456.2	NC_003279.8	6862227	6872096	2182	+	NC_003279.8	6878976	6881913	1338	-	*	0.9545	0.7811	0.89	3.87	0.29	3.94	0.42	0.51	0.27	2.6	4.1	0.29	3.97	4	2.48	7.93	2.25	6.82	2.53	2.07	2.04	5.3	5.22	1.21	7.14	6.67
cis_mRNA_dw20k	8164	NA	LTCONS_00001348	NM_059561.4	NC_003279.8	6862227	6872096	2182	+	NC_003279.8	6851381	6854064	1893	+	*	-0.9276	-0.7088	0.89	3.87	0.29	3.94	0.42	0.51	0.27	2.6	4.1	0.29	3.97	4	63.55	28.62	74.32	28.34	75.84	53.78	64.3	26.41	28.65	58.29	29.21	28.62
cis_mRNA_up10k	2199	NA	LTCONS_00001348	MTCONS_00001353	NC_003279.8	6862227	6872096	2182	+	NC_003279.8	6874294	6876950	1651	+	*	0.9612	0.7544	0.89	3.87	0.29	3.94	0.42	0.51	0.27	2.6	4.1	0.29	3.97	4	0.67	11.44	0.69	8.36	0.34	0.14	0.29	8.36	8.14	0.06	12.11	9.56
cis_mRNA_dw20k	11079	NA	LTCONS_00001349	NM_059560.3	NC_003279.8	6862227	6872096	2742	+	NC_003279.8	6850424	6851149	636	+	*	-0.7422	-0.9614	0.14	0.84	0	0.55	0.04	0.13	0.49	0.84	0.5	0	1.19	2.36	175.64	132.64	188.5	134.11	171.42	175.76	171.11	129.89	134	198	126.88	128.27
cis_mRNA_dw20k	12448	NA	LTCONS_00001349	NM_059559.4	NC_003279.8	6862227	6872096	2742	+	NC_003279.8	6847594	6849780	1818	+	*	-0.7358	-0.8807	0.14	0.84	0	0.55	0.04	0.13	0.49	0.84	0.5	0	1.19	2.36	78.34	49.12	96.32	45.72	76.63	85.27	68.35	53.97	47.28	84.14	47.03	44.66
cis_mRNA_dw20k	19128	NA	LTCONS_00001349	NM_059555.1	NC_003279.8	6862227	6872096	2742	+	NC_003279.8	6838354	6843100	2796	+	*	-0.6986	-0.8456	0.14	0.84	0	0.55	0.04	0.13	0.49	0.84	0.5	0	1.19	2.36	82.73	29.37	83.61	29.7	74.1	89.35	74.01	34.54	35.51	83.92	30.19	33.98
cis_mRNA_dw20k	19128	NA	LTCONS_00001349	NM_059556.3	NC_003279.8	6862227	6872096	2742	+	NC_003279.8	6838354	6843100	2784	+	*	-0.6047	-0.6597	0.14	0.84	0	0.55	0.04	0.13	0.49	0.84	0.5	0	1.19	2.36	82.33	47.5	84.12	49.04	94.94	71.62	89.55	38.49	47.09	73.04	49.67	50.68
cis_mRNA_dw20k	5645	NA	LTCONS_00001349	NM_001263411.1	NC_003279.8	6862227	6872096	2742	+	NC_003279.8	6877740	6888217	1461	-	*	0.6552	0.7614	0.14	0.84	0	0.55	0.04	0.13	0.49	0.84	0.5	0	1.19	2.36	4.51	6.56	2.4	6.01	0	1.98	2.17	4.32	8.98	1.21	6.33	7.65
cis_mRNA_dw20k	673	NA	LTCONS_00001349	NM_059564.4	NC_003279.8	6862227	6872096	2742	+	NC_003279.8	6872768	6873684	825	-	*	0.7074	0.8491	0.14	0.84	0	0.55	0.04	0.13	0.49	0.84	0.5	0	1.19	2.36	2.66	52.09	1.08	45.13	1.16	0.33	0.73	50.92	43	0.11	48.65	46.82
cis_mRNA_dw20k	6881	NA	LTCONS_00001349	NM_001026456.2	NC_003279.8	6862227	6872096	2742	+	NC_003279.8	6878976	6881913	1338	-	*	0.7129	0.8105	0.14	0.84	0	0.55	0.04	0.13	0.49	0.84	0.5	0	1.19	2.36	2.48	7.93	2.25	6.82	2.53	2.07	2.04	5.3	5.22	1.21	7.14	6.67
cis_mRNA_dw20k	8164	NA	LTCONS_00001349	NM_059561.4	NC_003279.8	6862227	6872096	2742	+	NC_003279.8	6851381	6854064	1893	+	*	-0.6789	-0.7575	0.14	0.84	0	0.55	0.04	0.13	0.49	0.84	0.5	0	1.19	2.36	63.55	28.62	74.32	28.34	75.84	53.78	64.3	26.41	28.65	58.29	29.21	28.62
cis_mRNA_up10k	2199	NA	LTCONS_00001349	MTCONS_00001353	NC_003279.8	6862227	6872096	2742	+	NC_003279.8	6874294	6876950	1651	+	*	0.7264	0.8489	0.14	0.84	0	0.55	0.04	0.13	0.49	0.84	0.5	0	1.19	2.36	0.67	11.44	0.69	8.36	0.34	0.14	0.29	8.36	8.14	0.06	12.11	9.56
cis_mRNA_dw20k	3793	NA	LTCONS_00001382	NM_001026475.3	NC_003279.8	7063087	7063528	442	+	NC_003279.8	7057208	7059295	1248	+	*	0.8972	0.6117	0.08	0	0	0	1.06	0	0.38	0	0.07	0	0	0	9.7	0	22.97	0	51.3	1.38	32.23	2.78	0.65	1.28	3.48	0
cis_mRNA_up10k	1736	NA	LTCONS_00001382	NM_059599.2	NC_003279.8	7063087	7063528	442	+	NC_003279.8	7065263	7067899	1125	+	*	0.9704	0.6532	0.08	0	0	0	1.06	0	0.38	0	0.07	0	0	0	0.84	0.45	0.69	0.39	3.32	0.19	1.69	0.11	0.27	0.18	0.54	0.6
cis_mRNA_up10k	3259	NA	LTCONS_00001382	MTCONS_00001384	NC_003279.8	7063087	7063528	442	+	NC_003279.8	7066786	7068314	1409	+	*	0.7199	0.674	0.08	0	0	0	1.06	0	0.38	0	0.07	0	0	0	0.25	0.06	0.46	0.14	0.67	0.07	0.86	0.04	0.11	0.15	0	0.03
cis_mRNA_dw20k	10232	NA	LTCONS_00001386	NM_001047186.1	NC_003279.8	7081153	7088776	6715	+	NC_003279.8	7099007	7099404	303	-	*	0.8467	0.6889	0.3	0.15	0.47	0.17	1.11	0.18	0.86	0.09	0.16	0.15	0.18	0.17	9.91	4.45	10.89	6.22	23.11	7.08	11.06	7.05	3.7	10.85	7.61	2.98
cis_mRNA_dw20k	12840	NA	LTCONS_00001386	MTCONS_00001384	NC_003279.8	7081153	7088776	6715	+	NC_003279.8	7066786	7068314	1409	+	*	0.929	0.6292	0.3	0.15	0.47	0.17	1.11	0.18	0.86	0.09	0.16	0.15	0.18	0.17	0.25	0.06	0.46	0.14	0.67	0.07	0.86	0.04	0.11	0.15	0	0.03
cis_mRNA_dw20k	13255	NA	LTCONS_00001386	NM_059599.2	NC_003279.8	7081153	7088776	6715	+	NC_003279.8	7065263	7067899	1125	+	*	0.9513	0.8541	0.3	0.15	0.47	0.17	1.11	0.18	0.86	0.09	0.16	0.15	0.18	0.17	0.84	0.45	0.69	0.39	3.32	0.19	1.69	0.11	0.27	0.18	0.54	0.6
cis_mRNA_dw20k	2686	NA	LTCONS_00001386	NM_001263462.1	NC_003279.8	7081153	7088776	6715	+	NC_003279.8	7091461	7094511	2328	-	*	0.6953	0.6538	0.3	0.15	0.47	0.17	1.11	0.18	0.86	0.09	0.16	0.15	0.18	0.17	34.17	24.99	44.01	19.13	42.59	32.02	33.29	22.78	20.52	32.65	22.94	22.36
cis_mRNA_overlap	0	Lnc-AntiOverlap-mRNA	LTCONS_00001386	MTCONS_00004175	NC_003279.8	7081153	7088776	6715	+	NC_003279.8	7075922	7081500	2792	-	*	0.6283	0.7482	0.3	0.15	0.47	0.17	1.11	0.18	0.86	0.09	0.16	0.15	0.18	0.17	72.17	35.22	65.65	33.75	65.9	72.17	89.33	27.6	42.57	58.93	41.56	52.38
cis_mRNA_overlap	0	Lnc-AntiOverlap-mRNA	LTCONS_00001386	NM_059604.5	NC_003279.8	7081153	7088776	6715	+	NC_003279.8	7080416	7081500	570	-	-387.01	0.8211	0.6503	0.3	0.15	0.47	0.17	1.11	0.18	0.86	0.09	0.16	0.15	0.18	0.17	283.72	223.26	338.59	222.4	403.81	281.23	326.27	212.71	234.05	319.73	215.8	201.99
cis_mRNA_up10k	6713	NA	LTCONS_00001386	MTCONS_00001390	NC_003279.8	7081153	7088776	6715	+	NC_003279.8	7095488	7098987	2637	+	*	0.8225	0.7803	0.3	0.15	0.47	0.17	1.11	0.18	0.86	0.09	0.16	0.15	0.18	0.17	35.54	19.5	49.49	22.64	50.52	35.57	50.59	18.18	20.23	35.66	21.08	23.83
cis_mRNA_dw20k	10232	NA	LTCONS_00001387	NM_001047186.1	NC_003279.8	7086977	7088776	1800	+	NC_003279.8	7099007	7099404	303	-	*	0.8041	0.6268	0.13	0.2	0.59	0.07	0.68	0.24	0.38	0.15	0.15	0.25	0.15	0.17	9.91	4.45	10.89	6.22	23.11	7.08	11.06	7.05	3.7	10.85	7.61	2.98
cis_mRNA_dw20k	2686	NA	LTCONS_00001387	NM_001263462.1	NC_003279.8	7086977	7088776	1800	+	NC_003279.8	7091461	7094511	2328	-	*	0.8694	0.7042	0.13	0.2	0.59	0.07	0.68	0.24	0.38	0.15	0.15	0.25	0.15	0.17	34.17	24.99	44.01	19.13	42.59	32.02	33.29	22.78	20.52	32.65	22.94	22.36
cis_mRNA_up10k	5478	NA	LTCONS_00001387	NM_059604.5	NC_003279.8	7086977	7088776	1800	+	NC_003279.8	7080416	7081500	570	-	*	0.8713	0.7042	0.13	0.2	0.59	0.07	0.68	0.24	0.38	0.15	0.15	0.25	0.15	0.17	283.72	223.26	338.59	222.4	403.81	281.23	326.27	212.71	234.05	319.73	215.8	201.99
cis_mRNA_up10k	6713	NA	LTCONS_00001387	MTCONS_00001390	NC_003279.8	7086977	7088776	1800	+	NC_003279.8	7095488	7098987	2637	+	*	0.839	0.7113	0.13	0.2	0.59	0.07	0.68	0.24	0.38	0.15	0.15	0.25	0.15	0.17	35.54	19.5	49.49	22.64	50.52	35.57	50.59	18.18	20.23	35.66	21.08	23.83
cis_mRNA_up10k	6713	NA	LTCONS_00001387	NM_059608.4	NC_003279.8	7086977	7088776	1800	+	NC_003279.8	7095488	7098080	1821	+	*	0.8094	0.7324	0.13	0.2	0.59	0.07	0.68	0.24	0.38	0.15	0.15	0.25	0.15	0.17	35.69	22	39.03	19.14	47.02	32.65	33.7	20.09	22.46	37.62	21.43	21.11
cis_mRNA_dw20k	1334	NA	LTCONS_00001438	MTCONS_00004246	NC_003279.8	7314157	7317147	2991	+	NC_003279.8	7318480	7321818	1473	-	*	0.6234	0.6561	0.17	0.08	0.14	0.12	0.15	0.07	0.18	0.04	0.11	0.06	0.07	0.17	6	6.03	3.79	5.89	7.35	2.99	8.87	3.51	6.74	2.65	7.74	7.76
cis_mRNA_dw20k	5640	NA	LTCONS_00001438	MTCONS_00001434	NC_003279.8	7314157	7317147	2991	+	NC_003279.8	7304886	7308518	2407	+	*	0.7516	0.6947	0.17	0.08	0.14	0.12	0.15	0.07	0.18	0.04	0.11	0.06	0.07	0.17	18.63	11.43	19.74	13.57	19.45	16.16	19.96	9.48	14.03	14.85	13.87	15.17
cis_mRNA_dw20k	7462	NA	LTCONS_00001438	NM_001025932.3	NC_003279.8	7314157	7317147	2991	+	NC_003279.8	7305142	7306696	1122	+	*	-0.6394	-0.6632	0.17	0.08	0.14	0.12	0.15	0.07	0.18	0.04	0.11	0.06	0.07	0.17	0	1.13	0	0	0	0	0	1.26	0	2	0	0
cis_mRNA_dw20k	2873	NA	LTCONS_00001439	NM_001348614.1	NC_003279.8	7314157	7319458	3875	+	NC_003279.8	7322330	7323590	567	-	*	-0.6647	-0.6409	24.28	10.74	20.73	11.41	17.86	26.73	26.24	8.38	13.7	17.72	12.23	19	0.06	1.12	0.25	1.5	0	0.05	0	0.23	0.47	0	0.93	0.21
cis_mRNA_dw20k	5640	NA	LTCONS_00001439	MTCONS_00001433	NC_003279.8	7314157	7319458	3875	+	NC_003279.8	7304858	7308518	2444	+	*	0.8629	0.7902	24.28	10.74	20.73	11.41	17.86	26.73	26.24	8.38	13.7	17.72	12.23	19	19.75	7.59	19.46	7.78	14.9	27.05	19.25	8.18	7.9	22.55	7.75	11.06
cis_mRNA_dw20k	5640	NA	LTCONS_00001439	MTCONS_00001434	NC_003279.8	7314157	7319458	3875	+	NC_003279.8	7304886	7308518	2407	+	*	0.8154	0.8881	24.28	10.74	20.73	11.41	17.86	26.73	26.24	8.38	13.7	17.72	12.23	19	18.63	11.43	19.74	13.57	19.45	16.16	19.96	9.48	14.03	14.85	13.87	15.17
cis_mRNA_dw20k	5640	NA	LTCONS_00001439	NM_059666.5	NC_003279.8	7314157	7319458	3875	+	NC_003279.8	7307117	7308518	618	+	*	-0.8169	-0.69	24.28	10.74	20.73	11.41	17.86	26.73	26.24	8.38	13.7	17.72	12.23	19	7.6	15.58	6.3	15.66	3.98	0	0	16.63	14.02	4.54	19.45	17.44
cis_mRNA_up10k	634	NA	LTCONS_00001439	NM_059668.3	NC_003279.8	7314157	7319458	3875	+	NC_003279.8	7312911	7313524	441	-	*	0.8629	0.8182	24.28	10.74	20.73	11.41	17.86	26.73	26.24	8.38	13.7	17.72	12.23	19	34.49	14.25	33.95	16.18	24.69	43.26	34.37	14.57	14.66	36.99	11.82	16.93
cis_mRNA_up10k	9471	NA	LTCONS_00001439	MTCONS_00004234	NC_003279.8	7314157	7319458	3875	+	NC_003279.8	7296945	7304687	4789	-	*	0.906	0.8881	24.28	10.74	20.73	11.41	17.86	26.73	26.24	8.38	13.7	17.72	12.23	19	22.35	13.84	22.32	14.5	21.71	26.28	23.37	12.49	14.33	22.89	13.67	16.29
cis_mRNA_dw20k	14762	NA	LTCONS_00001454	NM_059686.3	NC_003279.8	7403477	7403849	373	+	NC_003279.8	7388110	7388716	522	+	*	0.7894	0.8577	0	0.3	0	0.54	0	0	0	1.59	0.33	0	0.53	0.19	0.06	1.24	0.24	1.05	0.24	0	0.3	1.49	0.88	0.06	0.93	1.03
cis_mRNA_dw20k	770	NA	LTCONS_00001454	NM_059689.5	NC_003279.8	7403477	7403849	373	+	NC_003279.8	7401697	7402708	951	+	-871.4	0.7046	0.8547	0	0.3	0	0.54	0	0	0	1.59	0.33	0	0.53	0.19	13.95	561.87	0.36	841.83	0.5	1.36	0.48	888.21	831.92	0.13	593.79	856.47
cis_mRNA_overlap	0	Lnc-AntiCompleteIn-mRNAExon	LTCONS_00001454	NM_059690.1	NC_003279.8	7403477	7403849	373	+	NC_003279.8	7403341	7404352	951	-	-876	0.7621	0.8995	0	0.3	0	0.54	0	0	0	1.59	0.33	0	0.53	0.19	11.87	705.31	2	774.76	0.5	1.06	1.15	968.42	759.11	0.4	728.9	747.05
cis_mRNA_dw20k	14111	NA	LTCONS_00001456	NM_059689.5	NC_003279.8	7416818	7420341	3524	+	NC_003279.8	7401697	7402708	951	+	*	0.7118	0.6807	0.4	0.58	0.23	0.61	0.52	0.17	0.56	0.53	0.57	0.23	0.56	0.65	13.95	561.87	0.36	841.83	0.5	1.36	0.48	888.21	831.92	0.13	593.79	856.47
cis_mRNA_up10k	977	NA	LTCONS_00001457	NM_001026703.2	NC_003279.8	7420519	7421809	1291	+	NC_003279.8	7422785	7453729	5451	+	*	0.6718	0.6375	0.5	0.61	0.24	0.59	0.61	0.34	0.44	0.3	0.65	0.19	0.41	0.79	4.16	5.88	2.13	4.85	7.1	1.75	5.25	3.41	4.98	1.81	7.06	5.08
cis_mRNA_overlap	0	Lnc-AntiOverlap-mRNA	LTCONS_00001473	NM_059700.4	NC_003279.8	7489809	7491164	1272	+	NC_003279.8	7486801	7490167	2154	-	*	-0.6701	-0.6445	0.25	1.45	0.08	0.71	0.02	0.16	0.3	0.69	0.9	0.02	0.98	1.6	10.51	5.46	8.29	5.02	9.7	11.65	9.83	3.29	5.29	15.7	6.49	6.81
cis_mRNA_up10k	3770	NA	LTCONS_00001473	NM_059699.1	NC_003279.8	7489809	7491164	1272	+	NC_003279.8	7484176	7486040	1473	-	*	0.9082	0.8325	0.25	1.45	0.08	0.71	0.02	0.16	0.3	0.69	0.9	0.02	0.98	1.6	0.31	4.28	0.68	2.5	0.88	0.31	0.79	2.99	2.79	0.31	3.27	3.05
cis_mRNA_up10k	4279	NA	LTCONS_00001473	NM_001025837.3	NC_003279.8	7489809	7491164	1272	+	NC_003279.8	7495442	7503233	5652	+	*	-0.8536	-0.711	0.25	1.45	0.08	0.71	0.02	0.16	0.3	0.69	0.9	0.02	0.98	1.6	113.54	36.77	118.56	36.69	106.84	96.37	98.25	34.64	39.74	100.64	36.98	39.42
cis_mRNA_up10k	4482	NA	LTCONS_00001512	MTCONS_00004297	NC_003279.8	7647722	7647981	260	+	NC_003279.8	7640425	7643241	2171	-	*	0.6464	0.6609	0.39	0	0	0	0.87	0	1.26	0	0	0	0	0	48.62	23.7	56.16	25.47	55.09	48.3	57.9	21.86	25.76	42.98	27.68	29.72
tran	NA	NA	LTCONS_00001529	MTCONS_00009374	NC_003279.8	7721974	7723103	948	+	NC_003280.10	2018621	2023951	5147	-	-396.16	0.636	0.7426	13.55	13.35	16.98	11	30.08	8.71	19.99	12.7	11.08	10.5	12.55	10.76	0.88	1.09	0.96	0.48	1.06	0.6	1.14	1	0.55	0.61	0.99	0.6
tran	NA	NA	LTCONS_00001529	MTCONS_00036226	NC_003279.8	7721974	7723103	948	+	NC_003284.9	8409366	8411054	1504	-	-404.69	0.8614	0.6515	13.55	13.35	16.98	11	30.08	8.71	19.99	12.7	11.08	10.5	12.55	10.76	0.62	0.81	0.47	0.59	1.9	0.44	1.31	1.04	0.63	0.26	0.93	0.63
tran	NA	NA	LTCONS_00001529	NM_064731.2	NC_003279.8	7721974	7723103	948	+	NC_003281.10	57702	58682	579	+	-249.37	0.8231	0.7203	13.55	13.35	16.98	11	30.08	8.71	19.99	12.7	11.08	10.5	12.55	10.76	1.24	2.48	2.38	1.28	5.27	0.83	1.93	1.62	1.59	1.15	3.5	1.3
cis_mRNA_dw20k	19944	NA	LTCONS_00001538	NM_001047191.3	NC_003279.8	7746819	7747197	379	+	NC_003279.8	7725029	7726876	1125	+	*	0.6456	0.746	0.1	0	0.67	0	0.47	0	0.95	0	0	0	0.09	0	19.52	4.49	26.34	0	19.79	21.81	22.64	5.05	0	18.67	7.3	0
cis_mRNA_up10k	8301	NA	LTCONS_00001538	MTCONS_00001540	NC_003279.8	7746819	7747197	379	+	NC_003279.8	7755497	7756568	1021	+	*	0.7505	0.811	0.1	0	0.67	0	0.47	0	0.95	0	0	0	0.09	0	6.15	3.34	7.83	4.23	21.96	2.2	15.07	0.88	3.23	2.9	3.94	4.06
cis_mRNA_dw20k	11579	NA	LTCONS_00001539	NM_001083134.3	NC_003279.8	7747284	7755260	7977	+	NC_003279.8	7766838	7772208	2475	-	*	0.6887	0.7958	0.33	0.09	0.47	0.08	0.6	0.12	0.56	0.01	0.07	0.16	0.12	0.12	75.61	34.44	69.37	37.16	61.6	68.09	69.21	27.68	41.38	68.83	41.36	43.53
cis_mRNA_dw20k	18474	NA	LTCONS_00001539	MTCONS_00001531	NC_003279.8	7747284	7755260	7977	+	NC_003279.8	7725029	7728811	2616	+	*	-0.7039	-0.6761	0.33	0.09	0.47	0.08	0.6	0.12	0.56	0.01	0.07	0.16	0.12	0.12	66.18	73.67	69.81	76.3	61.89	65.43	58.86	70.63	73.75	66.31	76.14	81.07
cis_mRNA_dw20k	18474	NA	LTCONS_00001539	NM_059748.4	NC_003279.8	7747284	7755260	7977	+	NC_003279.8	7727267	7728811	1101	+	*	-0.7041	-0.7743	0.33	0.09	0.47	0.08	0.6	0.12	0.56	0.01	0.07	0.16	0.12	0.12	0	23.84	0	24.78	0	0	0	16.17	25.81	0	24.31	16.95
cis_mRNA_up10k	238	NA	LTCONS_00001539	MTCONS_00001540	NC_003279.8	7747284	7755260	7977	+	NC_003279.8	7755497	7756568	1021	+	*	0.9044	0.7465	0.33	0.09	0.47	0.08	0.6	0.12	0.56	0.01	0.07	0.16	0.12	0.12	6.15	3.34	7.83	4.23	21.96	2.2	15.07	0.88	3.23	2.9	3.94	4.06
cis_mRNA_dw20k	8337	NA	LTCONS_00001542	MTCONS_00001540	NC_003279.8	7764904	7766492	1589	+	NC_003279.8	7755497	7756568	1021	+	*	0.9616	0.6956	0.22	0.01	0.11	0	0.75	0	0.33	0	0.01	0.02	0.01	0	6.15	3.34	7.83	4.23	21.96	2.2	15.07	0.88	3.23	2.9	3.94	4.06
cis_mRNA_up10k	6947	NA	LTCONS_00001542	MTCONS_00001548	NC_003279.8	7764904	7766492	1589	+	NC_003279.8	7773438	7777643	3054	+	*	0.9031	0.7995	0.22	0.01	0.11	0	0.75	0	0.33	0	0.01	0.02	0.01	0	32.07	13.25	27.29	17.45	44.64	15.41	35.69	5.53	13.83	17.88	16.4	14.52
cis_mRNA_up10k	6947	NA	LTCONS_00001542	NM_059752.5	NC_003279.8	7764904	7766492	1589	+	NC_003279.8	7773438	7777469	2895	+	*	0.6275	0.7637	0.22	0.01	0.11	0	0.75	0	0.33	0	0.01	0.02	0.01	0	22.41	13.63	27.71	13.91	25.67	15.64	21.85	12.72	14.18	24.03	13	12.96
cis_mRNA_dw20k	13015	NA	LTCONS_00001578	NM_059792.6	NC_003279.8	7931750	7933930	2181	+	NC_003279.8	7946944	7951544	2244	-	*	0.8928	0.8042	0.17	0.39	0.24	0.62	0.12	0.13	0.28	0.44	0.46	0.14	0.38	0.53	10.86	30.39	8.58	32.51	12.78	5.84	12.83	24.68	31.92	5.85	33.21	30.6
cis_mRNA_dw20k	3743	NA	LTCONS_00001578	NM_059787.3	NC_003279.8	7931750	7933930	2181	+	NC_003279.8	7937672	7938482	552	-	*	0.8259	0.8392	0.17	0.39	0.24	0.62	0.12	0.13	0.28	0.44	0.46	0.14	0.38	0.53	0.29	1.25	0.5	1.27	0.28	0.22	0.55	0.67	1.13	0.17	1.67	1.28
cis_mRNA_dw20k	6263	NA	LTCONS_00001578	NM_059789.4	NC_003279.8	7931750	7933930	2181	+	NC_003279.8	7940192	7940697	336	-	*	-0.8835	-0.6993	0.17	0.39	0.24	0.62	0.12	0.13	0.28	0.44	0.46	0.14	0.38	0.53	44.61	10.03	45.83	12.04	40.95	60.57	42.04	12.85	14.58	54.33	11.64	14.39
cis_mRNA_overlap	0	Lnc-AntiOverlap-mRNA	LTCONS_00001578	NM_059785.6	NC_003279.8	7931750	7933930	2181	+	NC_003279.8	7927071	7934543	6012	-	-3582.88	-0.8834	-0.7902	0.17	0.39	0.24	0.62	0.12	0.13	0.28	0.44	0.46	0.14	0.38	0.53	222.1	117.78	245.6	121.03	225.03	211.07	200.25	121.47	123.5	230.51	121.49	119.52
cis_mRNA_up10k	2337	NA	LTCONS_00001578	MTCONS_00001580	NC_003279.8	7931750	7933930	2181	+	NC_003279.8	7936266	7940072	3257	+	*	-0.8285	-0.6853	0.17	0.39	0.24	0.62	0.12	0.13	0.28	0.44	0.46	0.14	0.38	0.53	48.2	14.21	45.62	15.34	41.88	51.8	50.49	12.91	19.91	41.57	16.92	24.39
cis_mRNA_up10k	2337	NA	LTCONS_00001578	NM_059786.4	NC_003279.8	7931750	7933930	2181	+	NC_003279.8	7936266	7937651	1071	+	*	-0.7785	-0.8392	0.17	0.39	0.24	0.62	0.12	0.13	0.28	0.44	0.46	0.14	0.38	0.53	26.28	20.76	45.71	15.77	31	33.17	19.85	19.2	10.35	39.45	16.52	10.51
cis_mRNA_up10k	5414	NA	LTCONS_00001578	NM_059784.5	NC_003279.8	7931750	7933930	2181	+	NC_003279.8	7918647	7926337	4848	-	*	-0.8601	-0.7133	0.17	0.39	0.24	0.62	0.12	0.13	0.28	0.44	0.46	0.14	0.38	0.53	47.49	24.49	51.14	22.89	41.91	46.26	43.42	20.71	25.87	47.41	27.79	29.07
cis_mRNA_up10k	6990	NA	LTCONS_00001578	MTCONS_00001583	NC_003279.8	7931750	7933930	2181	+	NC_003279.8	7940919	7945609	3161	+	*	-0.8521	-0.6853	0.17	0.39	0.24	0.62	0.12	0.13	0.28	0.44	0.46	0.14	0.38	0.53	39.79	15.23	44.86	18.05	44.56	46.93	42.56	15.42	16.87	36.63	15.63	18.7
cis_mRNA_up10k	6990	NA	LTCONS_00001578	NM_059790.2	NC_003279.8	7931750	7933930	2181	+	NC_003279.8	7940919	7941697	600	+	*	-0.871	-0.7832	0.17	0.39	0.24	0.62	0.12	0.13	0.28	0.44	0.46	0.14	0.38	0.53	56.05	17.66	68.85	13.7	50.52	73.62	59.75	19.75	16.45	63.55	13.92	16.03
cis_mRNA_dw20k	14740	NA	LTCONS_00001593	NM_059799.3	NC_003279.8	8011323	8012425	1103	+	NC_003279.8	7995776	7996584	360	+	*	0.756	0.7846	0.22	0.6	0.19	0.3	0.22	0.09	0.33	0.15	0.26	0.13	0.44	0.52	1.2	2.57	0.62	2.2	2.34	0.61	1.55	0.34	2.93	0.84	2.13	3.59
cis_mRNA_dw20k	18528	NA	LTCONS_00001593	MTCONS_00001589	NC_003279.8	8011323	8012425	1103	+	NC_003279.8	7980091	7992796	6776	+	*	-0.7078	-0.8126	0.22	0.6	0.19	0.3	0.22	0.09	0.33	0.15	0.26	0.13	0.44	0.52	15.12	7.29	18.87	8.33	13.65	17.49	14.24	9.42	8.09	18.79	7.7	7.95
cis_mRNA_up10k	2044	NA	LTCONS_00001593	MTCONS_00001595	NC_003279.8	8011323	8012425	1103	+	NC_003279.8	8014468	8022477	4230	+	*	0.725	0.8231	0.22	0.6	0.19	0.3	0.22	0.09	0.33	0.15	0.26	0.13	0.44	0.52	14.85	18.28	16.59	20.09	15.05	14.33	17.49	16.01	21.18	13.83	22.63	24.85
cis_mRNA_up10k	2044	NA	LTCONS_00001593	NM_001047180.2	NC_003279.8	8011323	8012425	1103	+	NC_003279.8	8014468	8019071	2319	+	*	0.6918	0.7601	0.22	0.6	0.19	0.3	0.22	0.09	0.33	0.15	0.26	0.13	0.44	0.52	2.72	5.88	2.19	8.03	2.81	2.62	3.08	3.75	7	2.56	8.98	8.47
cis_mRNA_up10k	5040	NA	LTCONS_00001593	NM_059801.2	NC_003279.8	8011323	8012425	1103	+	NC_003279.8	8005191	8006284	768	-	*	0.6446	0.6445	0.22	0.6	0.19	0.3	0.22	0.09	0.33	0.15	0.26	0.13	0.44	0.52	0.75	14.47	0.81	10.72	0.33	0.11	0.44	13.17	9.21	0	14.53	10.61
cis_mRNA_up10k	5721	NA	LTCONS_00001593	NM_001047181.1	NC_003279.8	8011323	8012425	1103	+	NC_003279.8	8018145	8019071	570	+	*	0.6359	0.676	0.22	0.6	0.19	0.3	0.22	0.09	0.33	0.15	0.26	0.13	0.44	0.52	5.95	18.05	4.2	15.71	4.62	0.95	3.14	13.58	16.62	1.45	18.45	11.31
cis_mRNA_up10k	8145	NA	LTCONS_00001593	NM_059800.3	NC_003279.8	8011323	8012425	1103	+	NC_003279.8	7996806	8003179	2607	-	*	0.8778	0.9474	0.22	0.6	0.19	0.3	0.22	0.09	0.33	0.15	0.26	0.13	0.44	0.52	0.96	3.1	0.76	2.39	1.52	0.27	1.55	0.57	2.68	0.27	3.43	2.95
cis_mRNA_dw20k	1300	NA	LTCONS_00001602	NM_059814.3	NC_003279.8	8044419	8049794	5376	+	NC_003279.8	8040800	8043120	2085	+	*	0.6215	0.627	0.82	0.37	0.5	0.35	0.38	0.44	0.72	0.41	0.37	0.45	0.27	0.46	44.63	18.31	45.68	20.13	32.7	50.9	45.01	16.22	21.99	46.14	20.53	24.16
cis_mRNA_up10k	250	NA	LTCONS_00001602	NM_059816.4	NC_003279.8	8044419	8049794	5376	+	NC_003279.8	8050043	8055141	3561	+	*	0.6369	0.6725	0.82	0.37	0.5	0.35	0.38	0.44	0.72	0.41	0.37	0.45	0.27	0.46	62.66	15.75	64.94	13.03	64	46.45	59.24	12.62	18.91	48.86	18.33	19.99
cis_mRNA_up10k	4668	NA	LTCONS_00001602	MTCONS_00004371	NC_003279.8	8044419	8049794	5376	+	NC_003279.8	8032958	8039752	4577	-	*	0.6715	0.7005	0.82	0.37	0.5	0.35	0.38	0.44	0.72	0.41	0.37	0.45	0.27	0.46	23.87	11.45	23.97	13.85	21.79	25.07	27.01	10.74	13.81	21.71	13.5	15.85
cis_mRNA_dw20k	3223	NA	LTCONS_00001612	MTCONS_00001609	NC_003279.8	8101588	8102764	1177	+	NC_003279.8	8083630	8098366	8850	+	*	-0.6987	-0.7461	0.51	0.24	0.22	0.61	0.29	0.31	0.35	0.55	0.59	0.26	0.78	0.61	9.4	8.53	16.73	7.23	16.55	11.22	10.47	7.61	7.48	11.45	8.56	5.17
cis_mRNA_dw20k	3768	NA	LTCONS_00001618	NM_059828.4	NC_003279.8	8138502	8140781	2280	+	NC_003279.8	8134144	8134735	513	+	*	0.8739	0.8647	0.17	0.02	0.17	0.03	0.52	0.05	0.32	0.02	0	0.07	0.03	0.01	205.98	80.69	166.14	53.08	215.9	55.41	189.88	51.27	52.85	78.51	64.74	45.64
cis_mRNA_overlap	0	Lnc-AntiOverlap-mRNA	LTCONS_00001618	NM_059829.4	NC_003279.8	8138502	8140781	2280	+	NC_003279.8	8139505	8142537	1584	-	*	0.9294	0.7838	0.17	0.02	0.17	0.03	0.52	0.05	0.32	0.02	0	0.07	0.03	0.01	0.51	0.19	0.24	0.16	0.75	0.08	0.71	0.09	0.13	0.22	0.18	0.12
cis_mRNA_up10k	9586	NA	LTCONS_00001618	NM_001026472.3	NC_003279.8	8138502	8140781	2280	+	NC_003279.8	8150366	8151317	555	+	*	-0.6164	-0.7065	0.17	0.02	0.17	0.03	0.52	0.05	0.32	0.02	0	0.07	0.03	0.01	0.97	14.11	0.5	9.1	0.22	0.16	0.55	10.37	11.45	0	17.77	15.69
cis_mRNA_dw20k	594	NA	LTCONS_00001646	NM_059843.4	NC_003279.8	8244099	8244316	218	+	NC_003279.8	8242140	8243506	1023	+	*	0.7351	0.655	0	1.77	0	1.24	0	0	0	0	0.93	0	1.32	0.25	4.4	90.43	3.08	89.89	0.71	0.34	0.93	92.17	85.41	0.3	92.11	83.14
cis_mRNA_overlap	0	Lnc-AntiCompleteIn-mRNAExon	LTCONS_00001646	NM_059844.6	NC_003279.8	8244099	8244316	218	+	NC_003279.8	8243754	8244948	1146	-	-504.1	0.8914	0.889	0	1.77	0	1.24	0	0	0	0	0.93	0	1.32	0.25	24	680.39	6.69	632.64	2.34	5.7	0.73	28.43	602.21	9.37	686.21	589.05
cis_mRNA_up10k	417	NA	LTCONS_00001652	NM_059856.6	NC_003279.8	8294049	8294466	418	+	NC_003279.8	8294882	8296724	1419	+	*	0.6208	0.7055	0	0.07	0.91	0.07	0.41	0.16	0.33	0	0.3	0.42	0	0.24	61.88	25.83	81.24	31.21	84.21	74.72	81.65	25.85	30.89	64.92	25.58	29.65
cis_mRNA_dw20k	18154	NA	LTCONS_00001734	NM_059961.7	NC_003279.8	8751536	8751833	298	+	NC_003279.8	8732337	8733383	528	+	*	0.6152	0.8518	0.15	0	1.69	0	0	0.41	0.14	0	0	0	0	0.41	3.66	2.63	3.79	2.65	1.96	3.62	3.53	1.93	2.01	1.74	1.85	3.17
cis_mRNA_up10k	687	NA	LTCONS_00001742	NM_059975.4	NC_003279.8	8786072	8786323	252	+	NC_003279.8	8780265	8785386	1140	-	*	0.6077	0.6397	0	0	0	0	0.74	0	0.19	0	0	0	0	0	10.24	3	7.61	3.37	11.6	4.87	13.71	1.86	3.87	5.58	3.06	3.54
cis_mRNA_dw20k	16292	NA	LTCONS_00001743	NM_059980.4	NC_003279.8	8789595	8792715	3121	+	NC_003279.8	8809006	8811632	1827	-	*	0.7309	0.7509	0.45	0.58	0.57	0.67	0.5	0.42	0.68	0.24	0.57	0.37	0.54	0.74	0.53	0.59	0.41	1.3	0.75	0.38	0.72	0.37	0.76	0.38	1.02	1.12
cis_mRNA_dw20k	13055	NA	LTCONS_00001751	NM_059992.3	NC_003279.8	8831880	8832968	1089	+	NC_003279.8	8846022	8851095	3303	-	*	0.6798	0.7579	0.42	0.07	0.17	0.15	0.69	0.14	0.36	0.06	0.25	0.21	0.07	0.14	68.73	25.85	80.5	31.84	87.61	73.85	81.43	24.12	32.07	68.8	27.79	34.58
cis_mRNA_dw20k	9585	NA	LTCONS_00001751	NM_059991.3	NC_003279.8	8831880	8832968	1089	+	NC_003279.8	8842552	8845595	975	-	*	0.6116	0.7368	0.42	0.07	0.17	0.15	0.69	0.14	0.36	0.06	0.25	0.21	0.07	0.14	0.36	0.1	0.11	0.05	0.28	0.27	0.6	0.02	0.2	0.09	0.08	0.13
cis_mRNA_up10k	5304	NA	LTCONS_00001751	NM_059987.3	NC_003279.8	8831880	8832968	1089	+	NC_003279.8	8826207	8826577	282	-	*	-0.6096	-0.6035	0.42	0.07	0.17	0.15	0.69	0.14	0.36	0.06	0.25	0.21	0.07	0.14	0.84	26.21	1.4	19.23	1.36	0	0.62	24.59	15.64	0.47	18.16	18.42
cis_mRNA_dw20k	12706	NA	LTCONS_00001753	NM_001026331.2	NC_003279.8	8839488	8841128	1077	+	NC_003279.8	8853833	8861272	921	-	*	0.7629	0.6923	0.19	2.73	0.08	1.95	0.44	0.12	0.45	1.85	2.09	0	2.56	2.39	2	3.07	0.95	2.91	1.96	2.57	1.98	3.61	3.38	2.66	2.99	3.99
cis_mRNA_dw20k	15882	NA	LTCONS_00001753	NM_059986.2	NC_003279.8	8839488	8841128	1077	+	NC_003279.8	8822289	8823607	735	+	*	0.9886	0.9371	0.19	2.73	0.08	1.95	0.44	0.12	0.45	1.85	2.09	0	2.56	2.39	0.39	9.78	0.35	6.25	0.51	0.15	0.19	7.42	7.87	0.12	8.56	7.97
cis_mRNA_dw20k	18510	NA	LTCONS_00001753	NM_182068.4	NC_003279.8	8839488	8841128	1077	+	NC_003279.8	8816981	8820979	1698	+	*	-0.9636	-0.8601	0.19	2.73	0.08	1.95	0.44	0.12	0.45	1.85	2.09	0	2.56	2.39	56.15	27.52	70.17	30.42	57.65	65.03	56.88	27.55	31.45	63.88	28.02	32.99
cis_mRNA_dw20k	4895	NA	LTCONS_00001753	NM_059992.3	NC_003279.8	8839488	8841128	1077	+	NC_003279.8	8846022	8851095	3303	-	*	-0.9287	-0.6783	0.19	2.73	0.08	1.95	0.44	0.12	0.45	1.85	2.09	0	2.56	2.39	68.73	25.85	80.5	31.84	87.61	73.85	81.43	24.12	32.07	68.8	27.79	34.58
cis_mRNA_overlap	0	Lnc-Overlap-mRNA	LTCONS_00001753	NM_059989.1	NC_003279.8	8839488	8841128	1077	+	NC_003279.8	8840634	8841128	447	+	-145.39	0.9083	0.8811	0.19	2.73	0.08	1.95	0.44	0.12	0.45	1.85	2.09	0	2.56	2.39	0.42	3.96	0.43	1.81	1.59	0.02	0.55	3.65	2.46	0.08	3.37	2.23
cis_mRNA_up10k	643	NA	LTCONS_00001753	NM_059990.3	NC_003279.8	8839488	8841128	1077	+	NC_003279.8	8841770	8842309	450	+	*	0.9149	0.9296	0.19	2.73	0.08	1.95	0.44	0.12	0.45	1.85	2.09	0	2.56	2.39	0.31	3.36	0	2.94	0.07	0	0.15	0.69	1.9	0	2.54	2.05
cis_mRNA_up10k	896	NA	LTCONS_00001753	NM_059988.3	NC_003279.8	8839488	8841128	1077	+	NC_003279.8	8828418	8838593	8835	-	*	-0.9673	-0.8601	0.19	2.73	0.08	1.95	0.44	0.12	0.45	1.85	2.09	0	2.56	2.39	142.73	69.3	162.89	74.18	131.79	153.48	133.75	67.36	78.21	158.05	73.9	76.21
cis_mRNA_dw20k	16080	NA	LTCONS_00001779	NM_060017.3	NC_003279.8	9009540	9009857	318	+	NC_003279.8	8989938	8993461	1149	+	*	0.8704	0.728	0.27	0	0.13	0.21	1.24	0	0.38	0.1	0.81	0.13	0.23	0	0.09	0	0	0.02	0.3	0.02	0.11	0	0.08	0	0.11	0.04
cis_mRNA_dw20k	18495	NA	LTCONS_00001791	NM_060034.1	NC_003279.8	9078948	9079456	509	+	NC_003279.8	9058889	9060454	819	+	*	-0.6919	-0.7465	0.45	0.11	0.5	0.11	0.75	0.55	1.24	0.21	0.11	0.26	0	0.12	0.62	6.21	0.61	3.51	0.82	0.3	1.04	4.13	4.47	0.32	6.25	4.76
cis_mRNA_overlap	0	Lnc-AntiOverlap-mRNA	LTCONS_00001791	NM_060039.5	NC_003279.8	9078948	9079456	509	+	NC_003279.8	9077887	9080011	1440	-	-844.1	0.7258	0.824	0.45	0.11	0.5	0.11	0.75	0.55	1.24	0.21	0.11	0.26	0	0.12	66.69	23.47	82.42	21.55	82.05	72.54	65.4	23.38	21.08	68.27	20.72	21.72
cis_mRNA_dw20k	8192	NA	LTCONS_00001793	MTCONS_00004627	NC_003279.8	9092176	9093339	1164	+	NC_003279.8	9101530	9110607	3712	-	*	-0.7123	-0.7193	0.29	0.75	0.25	0.36	0.39	0.36	0.38	0.4	0.75	0.17	0.73	0.62	79.17	50.4	84.39	54.95	77.25	81.32	86.06	47.27	54.46	81.2	53.85	60.46
cis_mRNA_dw20k	8192	NA	LTCONS_00001793	NM_001026507.3	NC_003279.8	9092176	9093339	1164	+	NC_003279.8	9101530	9107539	2262	-	*	-0.7725	-0.7677	0.29	0.75	0.25	0.36	0.39	0.36	0.38	0.4	0.75	0.17	0.73	0.62	19.19	0	21	0	20.06	24.13	14.47	1.69	0	21.93	0	0
cis_mRNA_up10k	2674	NA	LTCONS_00001793	NM_060040.5	NC_003279.8	9092176	9093339	1164	+	NC_003279.8	9096012	9100058	1023	+	*	0.6626	0.6772	0.29	0.75	0.25	0.36	0.39	0.36	0.38	0.4	0.75	0.17	0.73	0.62	9.01	10.53	6.22	7.7	9.47	5.98	10.17	6.96	9.26	6.23	9.14	10.89
cis_mRNA_dw20k	163	NA	LTCONS_00001796	NM_060040.5	NC_003279.8	9100220	9101310	1091	+	NC_003279.8	9096012	9100058	1023	+	*	0.7737	0.8301	1.08	1.2	0.65	1.36	1.77	1.08	1.71	0.79	1.43	0.72	1.09	2.25	9.01	10.53	6.22	7.7	9.47	5.98	10.17	6.96	9.26	6.23	9.14	10.89
cis_mRNA_dw20k	2605	NA	LTCONS_00001906	MTCONS_00001902	NC_003279.8	9730491	9736940	6450	+	NC_003279.8	9721527	9727887	4903	+	*	0.8119	0.8511	0.98	0.74	0.82	0.65	0.77	0.61	0.98	0.41	0.83	0.58	0.62	1.08	2.79	2.43	2.33	2.19	3.24	1.81	3.35	1.72	2.6	1.56	2.4	3
cis_mRNA_dw20k	17222	NA	LTCONS_00001912	NM_060194.5	NC_003279.8	9751191	9753971	2781	+	NC_003279.8	9771192	9772560	1227	-	*	0.6715	0.6923	0.87	0.53	0.81	0.42	0.61	0.89	0.98	0.44	0.56	0.57	0.6	0.69	89.18	47.87	123.86	44.62	98.11	110.82	96.16	46.97	45.82	106.16	46.46	48.11
cis_mRNA_dw20k	5224	NA	LTCONS_00001912	MTCONS_00001907	NC_003279.8	9751191	9753971	2781	+	NC_003279.8	9737787	9745968	3024	+	*	0.6595	0.7762	0.87	0.53	0.81	0.42	0.61	0.89	0.98	0.44	0.56	0.57	0.6	0.69	26.03	16.46	29.72	17.23	35.57	22.36	34.33	11.61	18.18	21.66	17.37	17.59
cis_mRNA_dw20k	5224	NA	LTCONS_00001912	MTCONS_00001908	NC_003279.8	9751191	9753971	2781	+	NC_003279.8	9737787	9745968	3036	+	*	0.8065	0.8601	0.87	0.53	0.81	0.42	0.61	0.89	0.98	0.44	0.56	0.57	0.6	0.69	31.78	5.09	32.62	6.42	24.16	36.77	31.52	6.24	7.73	29.5	6.74	11.14
cis_mRNA_overlap	0	Lnc-Overlap-mRNA	LTCONS_00001912	MTCONS_00001913	NC_003279.8	9751191	9753971	2781	+	NC_003279.8	9752984	9757874	3053	+	*	0.8538	0.9091	0.87	0.53	0.81	0.42	0.61	0.89	0.98	0.44	0.56	0.57	0.6	0.69	58.37	17.96	57.2	19.9	50.86	67.38	67.32	16.52	25.19	55.32	23.09	33.48
cis_mRNA_overlap	0	Lnc-AntiOverlap-mRNA	LTCONS_00001919	MTCONS_00004820	NC_003279.8	9785339	9785727	389	+	NC_003279.8	9780829	9785722	3897	-	-664.01	0.6304	0.6437	0	0	0.73	0	0	0.09	0.27	0	0	0	0	0	16.58	3.97	23.62	3.99	14.14	20.59	14.82	3.97	4.36	16.33	4.85	5.22
cis_mRNA_overlap	0	Lnc-AntiCompleteIn-mRNAExon	LTCONS_00001964	MTCONS_00004861	NC_003279.8	9974068	9974494	427	+	NC_003279.8	9970113	9976286	2442	-	-816.9	0.7806	0.6434	0.17	0.14	0.56	0.41	1.27	0.86	0.71	0	0.22	0.08	0.29	0.23	33.17	17.23	51.18	21.12	63.93	28.08	44.58	18.55	19.27	29.16	20.82	20.58
cis_mRNA_dw20k	2118	NA	LTCONS_00002004	MTCONS_00004905	NC_003279.8	10184227	10185655	1429	+	NC_003279.8	10187772	10192832	4632	-	*	-0.6085	-0.7203	1.28	1.56	1.25	1.37	1.91	0.85	1.52	1.72	1.5	0.8	1.78	1.4	55.16	24.83	63.41	26.62	50.26	69.52	56.41	24.11	28.47	57.74	22.67	29.52
cis_mRNA_dw20k	296	NA	LTCONS_00002004	MTCONS_00002002	NC_003279.8	10184227	10185655	1429	+	NC_003279.8	10179845	10183932	3223	+	*	-0.9261	-0.8881	1.28	1.56	1.25	1.37	1.91	0.85	1.52	1.72	1.5	0.8	1.78	1.4	17.78	16.57	18.84	17.67	14.33	21.52	17.16	15.98	19.47	23.12	16.86	17.87
cis_mRNA_overlap	0	mRNA-AntiCompleteIn-LncExon	LTCONS_00002004	NM_060281.4	NC_003279.8	10184227	10185655	1429	+	NC_003279.8	10184646	10185446	702	-	-1461.67	-0.7166	-0.6573	1.28	1.56	1.25	1.37	1.91	0.85	1.52	1.72	1.5	0.8	1.78	1.4	2146.14	470.75	2589.16	541.93	1716.9	3209.31	1758.92	613.47	610.72	2984.2	478.04	537.55
cis_mRNA_up10k	7588	NA	LTCONS_00002004	NM_060285.1	NC_003279.8	10184227	10185655	1429	+	NC_003279.8	10193242	10193906	570	+	*	-0.8392	-0.7273	1.28	1.56	1.25	1.37	1.91	0.85	1.52	1.72	1.5	0.8	1.78	1.4	92.98	69.63	101.12	66.5	70.42	117.52	83.24	62.55	70.93	103.57	72.86	73.99
cis_mRNA_overlap	0	Lnc-AntiOverlap-mRNA	LTCONS_00002014	NM_060298.4	NC_003279.8	10290960	10292447	498	+	NC_003279.8	10292139	10297846	2727	-	-363.34	0.6265	0.6597	0.73	0.17	0.06	0.06	0.45	0.06	0.19	0	0	0.27	0	0	8.74	3.91	7.13	5.94	7.76	7.78	8.36	4.35	5.61	7.09	4.58	5.82
cis_mRNA_dw20k	1036	NA	LTCONS_00002035	NM_001264427.1	NC_003279.8	10361636	10362955	720	+	NC_003279.8	10356311	10360601	2163	+	*	0.6874	0.6783	0.4	0.25	0.16	0.52	0.24	0	0.28	0.03	0.8	0.04	0.18	0.53	0.42	4.84	0.2	6.1	0.03	0.17	0.38	2.23	6.78	0.15	5.02	6.82
cis_mRNA_dw20k	19738	NA	LTCONS_00002035	MTCONS_00004948	NC_003279.8	10361636	10362955	720	+	NC_003279.8	10382692	10391316	4057	-	*	0.7986	0.8757	0.4	0.25	0.16	0.52	0.24	0	0.28	0.03	0.8	0.04	0.18	0.53	0.63	0.54	0.46	0.77	0.6	0.54	0.79	0.09	0.87	0.44	0.51	0.93
cis_mRNA_dw20k	1263	NA	LTCONS_00002040	NM_001129007.2	NC_003279.8	10379997	10381882	961	+	NC_003279.8	10383144	10384222	501	-	*	-0.6021	-0.8032	36.88	21.33	43.89	26.91	38.13	50.69	38.73	23.24	25.29	47.71	25.44	26.38	0	0.28	0	0.07	0	0	0	0.64	0.03	0	0.44	0
cis_mRNA_dw20k	17276	NA	LTCONS_00002040	NM_060320.6	NC_003279.8	10379997	10381882	961	+	NC_003279.8	10399157	10400177	738	-	*	0.9587	0.9371	36.88	21.33	43.89	26.91	38.13	50.69	38.73	23.24	25.29	47.71	25.44	26.38	154.45	103.16	184.97	116.31	172.29	180.76	165.1	85.94	112.52	182.32	109.1	110.52
cis_mRNA_dw20k	19397	NA	LTCONS_00002040	NM_001026680.4	NC_003279.8	10379997	10381882	961	+	NC_003279.8	10356311	10360601	1722	+	*	-0.8507	-0.7063	36.88	21.33	43.89	26.91	38.13	50.69	38.73	23.24	25.29	47.71	25.44	26.38	0.87	6.35	0.11	9.43	0.44	0.14	0.53	4.77	7.9	0.76	8.52	8.27
cis_mRNA_dw20k	19397	NA	LTCONS_00002040	NM_001026681.3	NC_003279.8	10379997	10381882	961	+	NC_003279.8	10356311	10360601	1575	+	*	-0.8212	-0.6993	36.88	21.33	43.89	26.91	38.13	50.69	38.73	23.24	25.29	47.71	25.44	26.38	2.02	13.27	1.63	21.29	1.04	1.96	1.21	33.92	17.72	1.4	17.14	19.83
cis_mRNA_dw20k	19397	NA	LTCONS_00002040	NM_001264427.1	NC_003279.8	10379997	10381882	961	+	NC_003279.8	10356311	10360601	2163	+	*	-0.8103	-0.7203	36.88	21.33	43.89	26.91	38.13	50.69	38.73	23.24	25.29	47.71	25.44	26.38	0.42	4.84	0.2	6.1	0.03	0.17	0.38	2.23	6.78	0.15	5.02	6.82
cis_mRNA_dw20k	811	NA	LTCONS_00002040	MTCONS_00004949	NC_003279.8	10379997	10381882	961	+	NC_003279.8	10382692	10391316	4975	-	*	-0.8364	-0.655	36.88	21.33	43.89	26.91	38.13	50.69	38.73	23.24	25.29	47.71	25.44	26.38	0.15	0.51	0.02	0.58	0.11	0.2	0.23	0.5	0.55	0.2	0.41	0.6
cis_mRNA_dw20k	811	NA	LTCONS_00002040	MTCONS_00004950	NC_003279.8	10379997	10381882	961	+	NC_003279.8	10382692	10391316	3901	-	*	-0.7834	-0.7832	36.88	21.33	43.89	26.91	38.13	50.69	38.73	23.24	25.29	47.71	25.44	26.38	0.65	0.9	0.46	1.11	0.74	0.61	0.49	1.21	1.02	0.47	1.69	1.15
cis_mRNA_dw20k	911	NA	LTCONS_00002040	NM_001264435.1	NC_003279.8	10379997	10381882	961	+	NC_003279.8	10374814	10379087	2217	+	*	0.9241	0.7902	36.88	21.33	43.89	26.91	38.13	50.69	38.73	23.24	25.29	47.71	25.44	26.38	32.06	21.8	35.92	18.3	28.44	33.9	29.51	21.18	21.59	32.91	20.73	22.77
cis_mRNA_dw20k	3364	NA	LTCONS_00002052	NM_060332.4	NC_003279.8	10456172	10459139	2968	+	NC_003279.8	10452182	10452809	471	+	*	-0.6709	-0.6281	0.65	0.63	0.47	0.35	0.42	0.4	0.52	0.28	0.47	0.18	0.52	0.68	9.5	17.93	10.47	17.15	17.86	34.32	17.62	21.54	21.77	35.23	14.64	15.06
cis_mRNA_dw20k	11449	NA	LTCONS_00002073	NM_060351.4	NC_003279.8	10532061	10534480	1397	+	NC_003279.8	10519361	10520613	783	+	*	0.7642	0.725	0.73	1.17	0.66	2.34	0.53	0.78	0.8	1.11	1.81	0.66	1.99	2.77	159.63	189.98	170.4	224.39	195.48	175.17	184.21	199.52	205.99	186.96	224.52	205.07
cis_mRNA_dw20k	12901	NA	LTCONS_00002073	NM_060350.4	NC_003279.8	10532061	10534480	1397	+	NC_003279.8	10518381	10519161	681	+	*	-0.7479	-0.7356	0.73	1.17	0.66	2.34	0.53	0.78	0.8	1.11	1.81	0.66	1.99	2.77	89.52	40.87	101.45	44.79	85.54	100.69	83.37	45.77	48.25	96.42	43.71	51.79
cis_mRNA_dw20k	18715	NA	LTCONS_00002073	NM_060360.6	NC_003279.8	10532061	10534480	1397	+	NC_003279.8	10553194	10553794	462	-	*	0.6595	0.7601	0.73	1.17	0.66	2.34	0.53	0.78	0.8	1.11	1.81	0.66	1.99	2.77	1082.01	1446.51	798.27	1492.36	793.44	1266.34	929.42	1589.49	1606.71	1161.38	1297.21	1435.51
cis_mRNA_dw20k	18766	NA	LTCONS_00002073	NM_060347.4	NC_003279.8	10532061	10534480	1397	+	NC_003279.8	10509092	10513296	1548	+	*	0.7023	0.6515	0.73	1.17	0.66	2.34	0.53	0.78	0.8	1.11	1.81	0.66	1.99	2.77	0.74	1.59	0.3	1.22	0.82	0.1	0.67	0.53	0.8	0.05	1.9	1.53
cis_mRNA_dw20k	2027	NA	LTCONS_00002073	NM_001047204.2	NC_003279.8	10532061	10534480	1397	+	NC_003279.8	10526610	10530035	528	+	*	0.9423	0.8126	0.73	1.17	0.66	2.34	0.53	0.78	0.8	1.11	1.81	0.66	1.99	2.77	3.6	5.77	2.13	7.8	2.96	2.74	3.53	3.55	8.81	3.69	6.72	10.6
cis_mRNA_dw20k	6576	NA	LTCONS_00002073	NM_060353.2	NC_003279.8	10532061	10534480	1397	+	NC_003279.8	10524459	10525486	627	+	*	0.7888	0.7241	0.73	1.17	0.66	2.34	0.53	0.78	0.8	1.11	1.81	0.66	1.99	2.77	0.19	8.5	0.05	5.68	0.19	0.14	0	5.56	5.69	0.05	7.97	7.6
cis_mRNA_dw20k	8157	NA	LTCONS_00002073	NM_060352.2	NC_003279.8	10532061	10534480	1397	+	NC_003279.8	10522152	10523905	933	+	*	0.7102	0.8263	0.73	1.17	0.66	2.34	0.53	0.78	0.8	1.11	1.81	0.66	1.99	2.77	0.5	11.22	0.26	6.78	0.12	0.26	0.52	7.14	7.6	0.31	12.67	7.59
cis_mRNA_overlap	0	mRNA-CompleteIn-LncExon	LTCONS_00002073	NM_060355.3	NC_003279.8	10532061	10534480	1397	+	NC_003279.8	10532799	10534300	522	+	-232.65	0.7567	0.8161	0.73	1.17	0.66	2.34	0.53	0.78	0.8	1.11	1.81	0.66	1.99	2.77	1.25	1.04	0	2.38	0.2	0.42	0.18	1.7	3.76	0.01	2.26	1.9
cis_mRNA_up10k	8547	NA	LTCONS_00002073	NM_060357.4	NC_003279.8	10532061	10534480	1397	+	NC_003279.8	10543026	10546185	1737	+	*	-0.6841	-0.704	0.73	1.17	0.66	2.34	0.53	0.78	0.8	1.11	1.81	0.66	1.99	2.77	23.93	10.71	23.47	11.95	31.48	18.56	25.44	8.52	12.45	19.3	11.53	12.26
cis_mRNA_dw20k	19287	NA	LTCONS_00002075	MTCONS_00002067	NC_003279.8	10541250	10542376	1127	+	NC_003279.8	10519361	10521964	1562	+	*	0.7795	0.7719	0.26	0.42	0.47	0.21	0.76	0.05	0.46	0.12	0.11	0.07	0.21	0.26	60.75	56.49	63.63	65.74	71.07	52.33	61.68	50.74	56.26	54.87	60.57	59.68
cis_mRNA_up10k	3204	NA	LTCONS_00002075	NM_060356.2	NC_003279.8	10541250	10542376	1127	+	NC_003279.8	10536284	10538047	732	-	*	0.8633	0.6105	0.26	0.42	0.47	0.21	0.76	0.05	0.46	0.12	0.11	0.07	0.21	0.26	13.06	11.3	16.34	12.01	24.17	9.89	18.05	7.83	11.38	13.1	11.06	11
cis_mRNA_up10k	3462	NA	LTCONS_00002092	NM_060371.3	NC_003279.8	10585194	10587352	2159	+	NC_003279.8	10590813	10593840	1506	+	*	-0.625	-0.6686	0.39	0.07	0.26	0.12	0.52	0.08	0.58	0.11	0.03	0.09	0.07	0.08	0	13.06	0	13.05	0	0	0	10.01	10.48	0	16.77	8.92
cis_mRNA_dw20k	10184	NA	LTCONS_00002118	NM_060391.3	NC_003279.8	10681153	10681551	399	+	NC_003279.8	10667959	10670970	957	+	*	0.8274	0.8654	0.09	0	0.26	0	0.61	0	0.26	0	0	0.09	0	0	10.41	1.27	7.68	0.83	12.89	1.43	13.31	0.12	1.35	2.32	1.22	0.8
cis_mRNA_overlap	0	Lnc-AntiOverlap-mRNA	LTCONS_00002118	MTCONS_00005027	NC_003279.8	10681153	10681551	399	+	NC_003279.8	10677063	10683040	3483	-	-753.2	0.6393	0.7793	0.09	0	0.26	0	0.61	0	0.26	0	0	0.09	0	0	50.26	40.08	67.47	43.87	55.92	51.59	51.17	37.24	41.38	51.82	44.53	45.63
cis_mRNA_up10k	5820	NA	LTCONS_00002118	MTCONS_00002120	NC_003279.8	10681153	10681551	399	+	NC_003279.8	10687370	10696966	2087	+	*	0.7175	0.8106	0.09	0	0.26	0	0.61	0	0.26	0	0	0.09	0	0	22.04	8.62	24.19	8.41	25.72	22.97	26.25	8.48	9.03	17.95	7.92	9.57
cis_mRNA_up10k	6782	NA	LTCONS_00002118	NM_001264537.1	NC_003279.8	10681153	10681551	399	+	NC_003279.8	10688332	10690770	285	+	*	0.9088	0.6224	0.09	0	0.26	0	0.61	0	0.26	0	0	0.09	0	0	0.5	0	0.15	0	2.84	0	1.09	0.12	0.29	0	0.29	0
cis_mRNA_dw20k	11029	NA	LTCONS_00002164	NM_060428.1	NC_003279.8	10830137	10831420	1208	+	NC_003279.8	10817360	10819109	1203	+	*	-0.7571	-0.6573	0.13	0.95	0.15	0.69	0.04	0.02	0.26	0.82	0.64	0	0.93	0.8	17.01	6.28	13.85	5.3	18.15	9.55	17.92	3.92	5.32	9.84	6.45	6.5
cis_mRNA_dw20k	1893	NA	LTCONS_00002164	NM_060429.3	NC_003279.8	10830137	10831420	1208	+	NC_003279.8	10823381	10828245	3789	+	*	-0.7631	-0.7972	0.13	0.95	0.15	0.69	0.04	0.02	0.26	0.82	0.64	0	0.93	0.8	45.52	0.07	26.55	0.58	40.19	13.55	32.6	0.25	0.89	11.17	0.26	0.82
cis_mRNA_dw20k	19754	NA	LTCONS_00002164	NM_060424.3	NC_003279.8	10830137	10831420	1208	+	NC_003279.8	10808607	10810384	1152	+	*	-0.8438	-0.6993	0.13	0.95	0.15	0.69	0.04	0.02	0.26	0.82	0.64	0	0.93	0.8	17.58	12.19	19.1	12.21	17	18.07	19.87	12.2	13.44	16.21	13.98	13.33
cis_mRNA_dw20k	3349	NA	LTCONS_00002164	NM_182085.1	NC_003279.8	10830137	10831420	1208	+	NC_003279.8	10823381	10826789	2865	+	*	-0.695	-0.7063	0.13	0.95	0.15	0.69	0.04	0.02	0.26	0.82	0.64	0	0.93	0.8	14.45	0.21	4.94	0.14	6.66	3.91	7.02	0.71	0.34	3.01	0.07	0.3
cis_mRNA_up10k	5567	NA	LTCONS_00002164	NM_060431.1	NC_003279.8	10830137	10831420	1208	+	NC_003279.8	10836986	10838877	1479	+	*	-0.8664	-0.8371	0.13	0.95	0.15	0.69	0.04	0.02	0.26	0.82	0.64	0	0.93	0.8	2.18	0.05	0.97	0.09	1.84	1.26	1.66	0.06	0.13	1.08	0.05	0.21
cis_mRNA_dw20k	14298	NA	LTCONS_00002198	NM_001264633.1	NC_003279.8	11058996	11062075	1660	+	NC_003279.8	11076372	11084053	2805	-	*	0.7641	0.8561	0.64	0.6	1.35	0.2	1.21	0.53	0.68	0.55	0.08	0.76	0.55	0.08	36.76	17.26	38.02	14.11	34.13	4.59	25.7	15.43	14.94	26.99	13.2	9.2
cis_mRNA_dw20k	5625	NA	LTCONS_00002198	MTCONS_00005091	NC_003279.8	11058996	11062075	1660	+	NC_003279.8	11067699	11134559	16468	-	*	0.7203	0.7944	0.64	0.6	1.35	0.2	1.21	0.53	0.68	0.55	0.08	0.76	0.55	0.08	7.8	2.81	8.08	2.81	8.07	4.66	9.4	1.64	2.62	5.4	2.72	2
cis_mRNA_dw20k	6599	NA	LTCONS_00002198	NM_060460.4	NC_003279.8	11058996	11062075	1660	+	NC_003279.8	11039062	11052398	2460	+	*	0.8708	0.8561	0.64	0.6	1.35	0.2	1.21	0.53	0.68	0.55	0.08	0.76	0.55	0.08	21.14	17.52	24.22	15.92	23.59	19.09	22.52	17.15	15.74	20.17	19.37	18.17
cis_mRNA_dw20k	1559	NA	LTCONS_00002215	NM_001264652.1	NC_003279.8	11216155	11218139	1985	+	NC_003279.8	11213762	11214597	375	+	*	0.8714	0.8211	0.9	0.03	0.21	0.01	0.4	0.29	0.47	0.01	0.07	0.15	0.03	0.02	9.81	0.52	5.63	0.83	9.61	1.97	5.38	0.24	0.53	3.12	0.35	0.56
cis_mRNA_dw20k	4855	NA	LTCONS_00002215	NM_060476.4	NC_003279.8	11216155	11218139	1985	+	NC_003279.8	11206986	11211301	1443	+	*	0.814	0.8175	0.9	0.03	0.21	0.01	0.4	0.29	0.47	0.01	0.07	0.15	0.03	0.02	42.4	9.89	38.18	8.03	47.27	19.14	35.58	12.71	8.49	19.24	9.95	7.8
cis_mRNA_overlap	0	Lnc-AntiOverlap-mRNA	LTCONS_00002215	NM_060477.4	NC_003279.8	11216155	11218139	1985	+	NC_003279.8	11216373	11221975	1770	-	*	0.7072	0.7333	0.9	0.03	0.21	0.01	0.4	0.29	0.47	0.01	0.07	0.15	0.03	0.02	31.22	21.06	29.27	21.94	27.18	31.55	31.38	20.79	22.5	32.46	19.87	20.73
cis_mRNA_dw20k	5276	NA	LTCONS_00002223	NM_060485.2	NC_003279.8	11236843	11238561	1719	+	NC_003279.8	11243836	11245003	627	-	*	-0.7059	-0.8733	52.48	1.6	71.16	1.77	165.91	22.84	123.76	0.88	2	26.48	1.71	1.53	0.24	5.67	0.09	3.98	0	0.14	0	4.21	3.78	0	5.74	5.03
cis_mRNA_dw20k	14249	NA	LTCONS_00002224	NM_060490.1	NC_003279.8	11241150	11242302	1153	+	NC_003279.8	11256550	11259225	990	-	*	-0.6106	-0.7151	0.23	0.02	0.14	0.02	1.06	0.2	0.92	0.02	0.04	0.65	0.04	0	0.03	0.54	0.11	0.48	0.03	0.08	0.05	0.07	0.75	0	0.75	0.69
cis_mRNA_dw20k	1535	NA	LTCONS_00002224	NM_060485.2	NC_003279.8	11241150	11242302	1153	+	NC_003279.8	11243836	11245003	627	-	*	-0.6986	-0.8561	0.23	0.02	0.14	0.02	1.06	0.2	0.92	0.02	0.04	0.65	0.04	0	0.24	5.67	0.09	3.98	0	0.14	0	4.21	3.78	0	5.74	5.03
cis_mRNA_dw20k	453	NA	LTCONS_00002224	NM_060484.3	NC_003279.8	11241150	11242302	1153	+	NC_003279.8	11242754	11243520	687	-	-922.38	-0.6014	-0.7279	0.23	0.02	0.14	0.02	1.06	0.2	0.92	0.02	0.04	0.65	0.04	0	0.3	0.34	0	0.85	0	0	0	0.22	0.97	0	0.38	0.56
cis_mRNA_up10k	2107	NA	LTCONS_00002225	NM_060484.3	NC_003279.8	11245626	11247502	1604	+	NC_003279.8	11242754	11243520	687	-	*	0.7888	0.7831	19.35	25.17	14.29	77.04	20.57	19.27	17.74	35.01	46.03	27.54	30.78	28.53	0.3	0.34	0	0.85	0	0	0	0.22	0.97	0	0.38	0.56
cis_mRNA_up10k	5849	NA	LTCONS_00002225	NM_060489.2	NC_003279.8	11245626	11247502	1604	+	NC_003279.8	11253350	11255883	879	+	*	0.6206	0.648	19.35	25.17	14.29	77.04	20.57	19.27	17.74	35.01	46.03	27.54	30.78	28.53	1.26	17.74	0.58	16.67	0.37	0.2	0.2	18.29	15.89	0	16.25	14.64
cis_mRNA_dw20k	3014	NA	LTCONS_00002259	NM_060522.3	NC_003279.8	11443455	11445020	1566	+	NC_003279.8	11439311	11440442	816	+	*	0.6571	0.6388	0.13	0.61	0.52	0.04	0.1	0.32	0.27	1.05	0.06	0.27	0.61	0.12	0	1.88	1.17	0	0	0	0.03	0.97	0	0	0	0
cis_mRNA_dw20k	17641	NA	LTCONS_00002265	NM_060529.1	NC_003279.8	11489224	11489833	610	+	NC_003279.8	11469462	11471584	906	+	*	0.678	0.7755	0	0.61	0	1.16	0	0	0.15	0.13	0.63	0.05	0.62	0.28	0.29	12.97	0.23	5.47	0.03	0.1	0.03	0.49	4.96	0.27	15.03	4.64
cis_mRNA_overlap	0	Lnc-AntiOverlap-mRNA	LTCONS_00002265	NM_060535.1	NC_003279.8	11489224	11489833	610	+	NC_003279.8	11489230	11490560	906	-	-1463.8	0.8967	0.8435	0	0.61	0	1.16	0	0	0.15	0.13	0.63	0.05	0.62	0.28	12.42	178.2	3.82	205.79	0.55	2.2	2.3	38.19	207.37	1.39	173.19	158.32
cis_mRNA_up10k	2815	NA	LTCONS_00002265	NM_060533.4	NC_003279.8	11489224	11489833	610	+	NC_003279.8	11484839	11486410	723	-	*	0.7332	0.6757	0	0.61	0	1.16	0	0	0.15	0.13	0.63	0.05	0.62	0.28	0.44	9.81	0.16	9.3	0	0.04	0.08	11.05	8.68	0.04	8.99	7.2
cis_mRNA_up10k	830	NA	LTCONS_00002265	NM_060534.6	NC_003279.8	11489224	11489833	610	+	NC_003279.8	11486953	11488395	708	-	*	0.7401	0.6549	0	0.61	0	1.16	0	0	0.15	0.13	0.63	0.05	0.62	0.28	4.5	105.61	2.39	90.11	1.14	0.32	1.25	100.32	83.52	0.21	98.94	82.49
tran	NA	NA	LTCONS_00002265	NM_182305.3	NC_003279.8	11489224	11489833	610	+	NC_003282.8	1548734	1549674	885	+	-851.92	0.862	0.7902	0	0.61	0	1.16	0	0	0.15	0.13	0.63	0.05	0.62	0.28	18.41	319.42	6.34	254.44	1.74	2.24	4.02	39.75	257.58	4.17	279.33	204.35
cis_mRNA_dw20k	13989	NA	LTCONS_00002276	NM_060549.3	NC_003279.8	11584791	11585178	388	+	NC_003279.8	11565241	11570803	2472	+	*	-0.6899	-0.6316	1.35	0	1.29	1.03	1.82	0.54	0.92	0.08	0.08	0.38	0	0.18	0.73	5.92	0.49	4.06	0.63	0.38	0.34	4.24	4.08	0.27	5.87	4.03
cis_mRNA_overlap	0	Lnc-AntiOverlap-mRNA	LTCONS_00002276	NM_060554.4	NC_003279.8	11584791	11585178	388	+	NC_003279.8	11582759	11586047	1986	-	-448.8	-0.6973	-0.6702	1.35	0	1.29	1.03	1.82	0.54	0.92	0.08	0.08	0.38	0	0.18	0.31	4.72	0.47	2.89	0.25	0.14	0.42	3.15	2.43	0.2	4.49	3.4
cis_mRNA_up10k	1074	NA	LTCONS_00002276	NM_060555.4	NC_003279.8	11584791	11585178	388	+	NC_003279.8	11586251	11587294	420	+	*	-0.6957	-0.7324	1.35	0	1.29	1.03	1.82	0.54	0.92	0.08	0.08	0.38	0	0.18	0.02	6.95	0	5.46	0.42	0.08	0	5.06	5.06	0.59	7.19	4.34
cis_mRNA_up10k	7125	NA	LTCONS_00002276	NM_001313478.1	NC_003279.8	11584791	11585178	388	+	NC_003279.8	11592302	11601323	1395	+	*	-0.7311	-0.7241	1.35	0	1.29	1.03	1.82	0.54	0.92	0.08	0.08	0.38	0	0.18	0.9	1.92	0.02	0.01	0	0.83	0.98	1.91	1.43	0	1.84	2.75
cis_mRNA_up10k	7125	NA	LTCONS_00002276	NM_060557.4	NC_003279.8	11584791	11585178	388	+	NC_003279.8	11592302	11601323	1545	+	*	0.8587	0.8278	1.35	0	1.29	1.03	1.82	0.54	0.92	0.08	0.08	0.38	0	0.18	6.17	0	3.08	2	5.38	0.89	5.17	0.02	1.27	1.43	1.08	0
cis_mRNA_dw20k	15525	NA	LTCONS_00002278	NM_060549.3	NC_003279.8	11586327	11587328	727	+	NC_003279.8	11565241	11570803	2472	+	*	0.9779	0.9474	0.23	1.39	0.04	0.98	0.15	0	0.04	1.1	1.32	0	1.34	1.22	0.73	5.92	0.49	4.06	0.63	0.38	0.34	4.24	4.08	0.27	5.87	4.03
cis_mRNA_dw20k	17284	NA	LTCONS_00002278	NM_060558.2	NC_003279.8	11586327	11587328	727	+	NC_003279.8	11604611	11611301	1893	-	*	-0.9566	-0.8035	0.23	1.39	0.04	0.98	0.15	0	0.04	1.1	1.32	0	1.34	1.22	75.71	25.59	67.79	27.36	61.82	86.19	72.16	21.69	30.1	74.52	25.45	29.58
cis_mRNA_overlap	0	Lnc-Overlap-mRNA	LTCONS_00002278	NM_060555.4	NC_003279.8	11586327	11587328	727	+	NC_003279.8	11586251	11587294	420	+	-240.43	0.9666	0.7852	0.23	1.39	0.04	0.98	0.15	0	0.04	1.1	1.32	0	1.34	1.22	0.02	6.95	0	5.46	0.42	0.08	0	5.06	5.06	0.59	7.19	4.34
cis_mRNA_up10k	281	NA	LTCONS_00002278	NM_060554.4	NC_003279.8	11586327	11587328	727	+	NC_003279.8	11582759	11586047	1986	-	*	0.9535	0.8983	0.23	1.39	0.04	0.98	0.15	0	0.04	1.1	1.32	0	1.34	1.22	0.31	4.72	0.47	2.89	0.25	0.14	0.42	3.15	2.43	0.2	4.49	3.4
cis_mRNA_up10k	4342	NA	LTCONS_00002278	NM_060553.2	NC_003279.8	11586327	11587328	727	+	NC_003279.8	11579934	11581986	891	-	*	-0.7357	-0.7311	0.23	1.39	0.04	0.98	0.15	0	0.04	1.1	1.32	0	1.34	1.22	0.71	0.25	5.19	0.05	3.51	1.55	2.13	0.38	0.28	1.91	0.28	0.09
cis_mRNA_up10k	4975	NA	LTCONS_00002278	NM_001313478.1	NC_003279.8	11586327	11587328	727	+	NC_003279.8	11592302	11601323	1395	+	*	0.7224	0.7364	0.23	1.39	0.04	0.98	0.15	0	0.04	1.1	1.32	0	1.34	1.22	0.9	1.92	0.02	0.01	0	0.83	0.98	1.91	1.43	0	1.84	2.75
tran	498198	NA	LTCONS_00002290	MTCONS_00005303	NC_003279.8	11649515	11649883	369	+	NC_003279.8	12148080	12149811	1398	-	-180.37	0.7329	0.6573	0.92	0.79	0.5	2.04	0.71	0.58	0.59	0.33	1.46	0.3	1.07	2.11	0.88	0.66	0.73	1.65	0.89	0.51	1.25	1.12	1.42	0.56	0.91	1.32
tran	NA	NA	LTCONS_00002290	MTCONS_00008687	NC_003279.8	11649515	11649883	369	+	NC_003280.10	13852700	13855229	896	+	-168.63	0.7956	0.7273	0.92	0.79	0.5	2.04	0.71	0.58	0.59	0.33	1.46	0.3	1.07	2.11	7.36	5.36	1.97	18.71	5.12	3.5	6.32	8.99	9.9	3.31	6.25	10.72
cis_mRNA_dw20k	3239	NA	LTCONS_00002297	MTCONS_00005201	NC_003279.8	11684619	11685448	830	+	NC_003279.8	11688686	11690821	1247	-	*	0.7669	0.7642	0.24	0	0.33	0	0.44	0	0.26	0	0	0.04	0	0	5.11	2.29	5.15	2.69	9.7	5.47	7.86	0.72	2.49	6.98	2.24	1.46
cis_mRNA_dw20k	3239	NA	LTCONS_00002297	MTCONS_00005202	NC_003279.8	11684619	11685448	830	+	NC_003279.8	11688686	11690821	1143	-	*	0.6632	0.7408	0.24	0	0.33	0	0.44	0	0.26	0	0	0.04	0	0	1.01	0.64	1.63	0.43	1.25	0.42	1.12	1.05	0.44	1.24	0.73	1.15
cis_mRNA_dw20k	705	NA	LTCONS_00002297	MTCONS_00005200	NC_003279.8	11684619	11685448	830	+	NC_003279.8	11686152	11690821	3089	-	*	0.8394	0.7304	0.24	0	0.33	0	0.44	0	0.26	0	0	0.04	0	0	0.84	0.61	0.85	0.65	1.54	0.57	1.26	0.67	0.72	0.66	0.85	0.46
cis_mRNA_up10k	2256	NA	LTCONS_00002297	NM_060574.4	NC_003279.8	11684619	11685448	830	+	NC_003279.8	11681033	11682364	783	-	*	0.9467	0.8968	0.24	0	0.33	0	0.44	0	0.26	0	0	0.04	0	0	5.49	2.96	9.06	1.58	9.62	3.83	6.93	3.19	1.98	5	2.43	2.24
cis_mRNA_dw20k	9291	NA	LTCONS_00002302	NM_060590.1	NC_003279.8	11728826	11729436	611	+	NC_003279.8	11738726	11740762	1038	-	*	0.6706	0.6516	1.45	1.27	0.59	0.73	1.08	0.63	1.65	0.55	0.63	0.25	1.11	1.3	0.08	0	0	0	0	0	0.09	0	0	0	0	0
cis_mRNA_dw20k	316	NA	LTCONS_00002304	NM_001348620.1	NC_003279.8	11746419	11747447	638	+	NC_003279.8	11747762	11792066	14460	-	*	0.7213	0.7719	0.11	0.23	0.31	0.11	0.24	0.11	0.46	0.02	0	0.12	0.06	0	34.6	0	42.45	0	55.63	22.39	46.63	0	0	25.97	0	0
cis_mRNA_dw20k	17391	NA	LTCONS_00002305	NM_001026686.3	NC_003279.8	11746648	11747447	434	+	NC_003279.8	11764837	11792066	9972	-	*	-0.7891	-0.662	0.98	0.21	0.55	0.12	1.47	0.57	1.18	0.64	0	1.09	0.41	0.25	0.03	23.97	0	50.75	0.51	0	2.03	33.54	52.18	0	20.83	45.36
cis_mRNA_dw20k	17391	NA	LTCONS_00002305	NM_001026687.3	NC_003279.8	11746648	11747447	434	+	NC_003279.8	11764837	11792066	9969	-	*	-0.7428	-0.6923	0.98	0.21	0.55	0.12	1.47	0.57	1.18	0.64	0	1.09	0.41	0.25	1.74	6.53	0.83	8.37	2.63	0.01	1.54	6.29	10.55	0.77	5.96	9.01
cis_mRNA_dw20k	17391	NA	LTCONS_00002305	NM_001047256.3	NC_003279.8	11746648	11747447	434	+	NC_003279.8	11764837	11792066	10275	-	*	-0.7295	-0.6783	0.98	0.21	0.55	0.12	1.47	0.57	1.18	0.64	0	1.09	0.41	0.25	30.4	72.28	16.42	72.74	28.31	14.27	22.34	64.78	73.46	13.5	75.46	63.42
cis_mRNA_dw20k	316	NA	LTCONS_00002305	NM_001348620.1	NC_003279.8	11746648	11747447	434	+	NC_003279.8	11747762	11792066	14460	-	*	0.8461	0.8099	0.98	0.21	0.55	0.12	1.47	0.57	1.18	0.64	0	1.09	0.41	0.25	34.6	0	42.45	0	55.63	22.39	46.63	0	0	25.97	0	0
cis_mRNA_dw20k	316	NA	LTCONS_00002305	NM_001348622.1	NC_003279.8	11746648	11747447	434	+	NC_003279.8	11747762	11783939	14841	-	*	-0.7969	-0.7321	0.98	0.21	0.55	0.12	1.47	0.57	1.18	0.64	0	1.09	0.41	0.25	14.02	50.9	0	49.41	0.05	1.06	0	38.08	49.67	2.25	53.77	42.19
cis_mRNA_up10k	2698	NA	LTCONS_00002305	NM_060591.1	NC_003279.8	11746648	11747447	434	+	NC_003279.8	11741615	11743951	1728	-	*	-0.6437	-0.6014	0.98	0.21	0.55	0.12	1.47	0.57	1.18	0.64	0	1.09	0.41	0.25	0.47	4.28	0.26	1.95	0.5	0.07	0.46	2.05	2.35	0.17	4.09	2.07
cis_mRNA_up10k	8950	NA	LTCONS_00002305	NM_060589.1	NC_003279.8	11746648	11747447	434	+	NC_003279.8	11736637	11737699	816	-	*	0.6905	0.6597	0.98	0.21	0.55	0.12	1.47	0.57	1.18	0.64	0	1.09	0.41	0.25	0.93	0	0.61	0.03	0.76	0.4	0.3	0	0	0.25	0.03	0
cis_mRNA_dw20k	10516	NA	LTCONS_00002313	NM_001136317.2	NC_003279.8	11833974	11835257	1284	+	NC_003279.8	11820688	11823459	1341	+	*	-0.6304	-0.7004	0.06	0.45	0.02	0.49	0	0	0.02	0.21	0.19	0	0.54	0.29	0.25	0	0.15	0	0.1	0.08	0.21	0	0	0.02	0	0
cis_mRNA_dw20k	14742	NA	LTCONS_00002313	NM_001264802.1	NC_003279.8	11833974	11835257	1284	+	NC_003279.8	11815915	11819233	1350	+	*	-0.8332	-0.7972	0.06	0.45	0.02	0.49	0	0	0.02	0.21	0.19	0	0.54	0.29	14.69	0.94	10.18	1.6	8.97	14.9	12.54	1.1	1.7	11.28	1.09	2.27
cis_mRNA_dw20k	14742	NA	LTCONS_00002313	NM_001264803.1	NC_003279.8	11833974	11835257	1284	+	NC_003279.8	11816280	11819233	1362	+	*	-0.6278	-0.7192	0.06	0.45	0.02	0.49	0	0	0.02	0.21	0.19	0	0.54	0.29	1.17	0	0.86	0	0.29	0.66	0.46	0	0	0.13	0	0
cis_mRNA_dw20k	16697	NA	LTCONS_00002313	NM_001026601.3	NC_003279.8	11833974	11835257	1284	+	NC_003279.8	11851953	11868099	3213	-	*	-0.8602	-0.7725	0.06	0.45	0.02	0.49	0	0	0.02	0.21	0.19	0	0.54	0.29	31.17	12.97	34.83	13.97	30.09	26.81	30.39	13.65	14.84	32.13	13.38	13.74
cis_mRNA_dw20k	16697	NA	LTCONS_00002313	NM_001026602.3	NC_003279.8	11833974	11835257	1284	+	NC_003279.8	11851953	11868099	3138	-	*	-0.7288	-0.7866	0.06	0.45	0.02	0.49	0	0	0.02	0.21	0.19	0	0.54	0.29	2.59	0.18	1.28	0.81	1.12	1.57	1.04	1.07	0.52	1.67	0	0.36
cis_mRNA_dw20k	16697	NA	LTCONS_00002313	NM_170927.4	NC_003279.8	11833974	11835257	1284	+	NC_003279.8	11851953	11868099	3336	-	*	-0.8632	-0.8304	0.06	0.45	0.02	0.49	0	0	0.02	0.21	0.19	0	0.54	0.29	19.08	4.11	23.75	4.37	22.05	24.02	23.38	3.44	4.45	26.02	4.11	3.98
cis_mRNA_up10k	1334	NA	LTCONS_00002313	NM_060606.4	NC_003279.8	11833974	11835257	1284	+	NC_003279.8	11836590	11849160	1215	+	*	0.8858	0.8431	0.06	0.45	0.02	0.49	0	0	0.02	0.21	0.19	0	0.54	0.29	2.35	5.94	2.6	8.41	3.33	2.13	2.89	4.49	6.96	1.79	8.08	8.09
cis_mRNA_up10k	5242	NA	LTCONS_00002319	MTCONS_00002324	NC_003279.8	11896701	11900309	2284	+	NC_003279.8	11905550	11907680	1828	+	*	-0.7216	-0.697	2.63	4.14	4.01	1.73	2.48	3.3	1.9	5.18	2.41	3.14	4.46	2.13	2.81	0.2	0.09	0.92	1.93	0.94	2.15	0.12	1.9	0.39	0.12	1.17
cis_mRNA_overlap	0	mRNA-CompleteIn-LncExon	LTCONS_00002327	NM_060628.5	NC_003279.8	11930292	11931765	1012	+	NC_003279.8	11930807	11931635	255	+	-133.94	0.8341	0.7343	26.94	81.14	15.91	100.52	24.2	20.28	27.22	60.66	84.43	14.17	85.48	87.03	0.28	5.51	0.27	3.21	0.53	0.82	0.55	3.81	3.46	0	2.97	2.11
cis_mRNA_up10k	6385	NA	LTCONS_00002327	MTCONS_00005262	NC_003279.8	11930292	11931765	1012	+	NC_003279.8	11913125	11923908	2770	-	*	-0.8906	-0.6853	26.94	81.14	15.91	100.52	24.2	20.28	27.22	60.66	84.43	14.17	85.48	87.03	40.51	14.86	52.61	24.03	48.57	50.47	45.66	15.65	21.76	42.16	18.19	24
cis_mRNA_up10k	786	NA	LTCONS_00002327	NM_001264832.1	NC_003279.8	11930292	11931765	1012	+	NC_003279.8	11925275	11929507	1407	-	*	-0.9382	-0.7273	26.94	81.14	15.91	100.52	24.2	20.28	27.22	60.66	84.43	14.17	85.48	87.03	68.23	29.9	70.94	31.47	67.63	81.29	73.41	31.34	36.97	68.26	29.43	35.38
cis_mRNA_up10k	4949	NA	LTCONS_00002329	NM_001264832.1	NC_003279.8	11934455	11946246	11792	+	NC_003279.8	11925275	11929507	1407	-	*	0.6162	0.6573	0.89	0.48	1.03	0.38	1.75	0.49	1.91	0.27	0.36	0.5	0.43	0.42	68.23	29.9	70.94	31.47	67.63	81.29	73.41	31.34	36.97	68.26	29.43	35.38
cis_mRNA_up10k	770	NA	LTCONS_00002329	NM_060629.5	NC_003279.8	11934455	11946246	11792	+	NC_003279.8	11947015	11952832	1299	+	*	0.9316	0.8601	0.89	0.48	1.03	0.38	1.75	0.49	1.91	0.27	0.36	0.5	0.43	0.42	11.54	3.29	17.66	4.28	56.4	5.21	35.33	2.7	4.37	6.4	3.41	3.4
cis_mRNA_dw20k	2270	NA	LTCONS_00002346	MTCONS_00005279	NC_003279.8	12043294	12045616	2323	+	NC_003279.8	12047885	12064887	4532	-	*	0.8049	0.6865	12.36	2.84	8.57	3	22.72	6.03	25.56	1.92	4.83	3.92	3.84	7.25	5.98	4.67	6.54	3.94	7.69	6.48	7.25	3.94	4.34	4.31	5.1	3.56
cis_mRNA_dw20k	2270	NA	LTCONS_00002346	MTCONS_00005280	NC_003279.8	12043294	12045616	2323	+	NC_003279.8	12047885	12064887	4544	-	*	0.6541	0.6224	12.36	2.84	8.57	3	22.72	6.03	25.56	1.92	4.83	3.92	3.84	7.25	23.24	13.25	26.8	12.8	27.8	25.18	24.47	15.82	11.79	21.97	13.16	13.18
cis_mRNA_dw20k	309	NA	LTCONS_00002346	NM_060645.4	NC_003279.8	12043294	12045616	2323	+	NC_003279.8	12041158	12042986	480	+	*	0.9337	0.9091	12.36	2.84	8.57	3	22.72	6.03	25.56	1.92	4.83	3.92	3.84	7.25	66.09	26.92	58.32	30.93	175.18	34.49	122.09	27.58	35.42	37.95	27.68	34.41
cis_mRNA_overlap	0	Lnc-AntiOverlap-mRNA	LTCONS_00002346	NM_001026349.1	NC_003279.8	12043294	12045616	2323	+	NC_003279.8	12045236	12046593	663	-	*	0.7697	0.8301	12.36	2.84	8.57	3	22.72	6.03	25.56	1.92	4.83	3.92	3.84	7.25	9.79	2.44	5.72	2.71	8.33	6.52	9.78	2.44	4.21	7.6	2.41	3.47
cis_mRNA_up10k	9592	NA	LTCONS_00002346	NM_060643.3	NC_003279.8	12043294	12045616	2323	+	NC_003279.8	12032369	12033703	777	-	*	-0.6201	-0.6154	12.36	2.84	8.57	3	22.72	6.03	25.56	1.92	4.83	3.92	3.84	7.25	1.71	29.63	0.39	21.92	0.32	0.3	0.59	27.64	20.74	0.17	28.22	21.16
cis_mRNA_dw20k	15510	NA	LTCONS_00002348	NM_001026345.1	NC_003279.8	12049391	12050536	1146	+	NC_003279.8	12066045	12068660	567	-	*	0.7534	0.949	1.02	0.08	0.34	0.04	0.42	0.25	0.52	0.1	0.11	0.17	0.08	0.17	11.45	4.57	8.4	4.28	11.45	8.34	15.82	5.93	4.85	8.36	4.51	5.08
cis_mRNA_dw20k	9657	NA	LTCONS_00002348	MTCONS_00005281	NC_003279.8	12049391	12050536	1146	+	NC_003279.8	12060192	12064887	2489	-	*	0.6477	0.7018	1.02	0.08	0.34	0.04	0.42	0.25	0.52	0.1	0.11	0.17	0.08	0.17	31.73	14.15	20.74	19.58	17.84	29.58	28.68	11.27	19.66	24.28	17.3	26.01
cis_mRNA_overlap	0	Lnc-AntiOverlap-mRNA	LTCONS_00002348	MTCONS_00005280	NC_003279.8	12049391	12050536	1146	+	NC_003279.8	12047885	12064887	4544	-	-1005.95	0.6179	0.7684	1.02	0.08	0.34	0.04	0.42	0.25	0.52	0.1	0.11	0.17	0.08	0.17	23.24	13.25	26.8	12.8	27.8	25.18	24.47	15.82	11.79	21.97	13.16	13.18
cis_mRNA_up10k	2799	NA	LTCONS_00002348	NM_001026349.1	NC_003279.8	12049391	12050536	1146	+	NC_003279.8	12045236	12046593	663	-	*	0.8175	0.9051	1.02	0.08	0.34	0.04	0.42	0.25	0.52	0.1	0.11	0.17	0.08	0.17	9.79	2.44	5.72	2.71	8.33	6.52	9.78	2.44	4.21	7.6	2.41	3.47
cis_mRNA_dw20k	11275	NA	LTCONS_00002350	MTCONS_00005296	NC_003279.8	12095201	12095638	438	+	NC_003279.8	12106912	12112477	3615	-	*	0.6555	0.6823	0.16	0	0	0	0.54	0	0.15	0	0	0	0.28	0	2.21	1.16	1.04	1.65	3.63	0.58	4.21	0.78	1.49	0.67	1.91	2.62
cis_mRNA_dw20k	6020	NA	LTCONS_00002351	NM_060659.1	NC_003279.8	12106925	12108045	1121	+	NC_003279.8	12114064	12116290	1383	-	*	0.7258	0.6917	0.12	0.06	0.19	0	0.95	0	0.49	0	0	0.02	0	0	0.34	0.02	3.92	0.1	3.15	0.15	1.86	0.07	0.05	0.43	0.09	0.05
cis_mRNA_up10k	8987	NA	LTCONS_00002351	NM_060655.3	NC_003279.8	12106925	12108045	1121	+	NC_003279.8	12095804	12097939	996	-	*	0.8513	0.7539	0.12	0.06	0.19	0	0.95	0	0.49	0	0	0.02	0	0	42.77	7.14	53.63	18.25	76.36	18.14	82.09	5.29	17.59	27.81	7.57	17.02
cis_mRNA_up10k	949	NA	LTCONS_00002351	NM_060656.3	NC_003279.8	12106925	12108045	1121	+	NC_003279.8	12098716	12105977	4740	-	*	0.967	0.795	0.12	0.06	0.19	0	0.95	0	0.49	0	0	0.02	0	0	15.75	2.09	29.44	2.28	61.61	3.95	37.02	1.73	2.13	7.45	2.19	1.89
cis_mRNA_dw20k	10858	NA	LTCONS_00002416	NM_060754.3	NC_003279.8	12428828	12429139	312	+	NC_003279.8	12439996	12441253	933	-	*	0.6517	0.7476	0.14	0	0.26	0	0.26	0	1.17	0	0	0.13	0	0	0.03	0	0	0	0.03	0	0.03	0	0	0	0	0
cis_mRNA_dw20k	10936	NA	LTCONS_00002453	NM_060783.5	NC_003279.8	12546607	12549477	2871	+	NC_003279.8	12560412	12560672	261	-	*	0.8434	0.718	0.49	0.34	0.46	0.1	0.77	0.27	0.68	0.05	0.16	0.35	0.34	0.12	48.1	6.93	78.55	10.83	93.69	40.03	78.14	21.31	7.03	46.58	6.3	5.92
cis_mRNA_dw20k	11664	NA	LTCONS_00002453	NM_060784.4	NC_003279.8	12546607	12549477	2871	+	NC_003279.8	12561140	12561548	339	-	*	0.6367	0.655	0.49	0.34	0.46	0.1	0.77	0.27	0.68	0.05	0.16	0.35	0.34	0.12	22.51	5.15	12.4	6.08	10.63	10.21	26.9	8.86	4.37	11.57	3.76	4.95
cis_mRNA_dw20k	12483	NA	LTCONS_00002453	NM_001264996.1	NC_003279.8	12546607	12549477	2871	+	NC_003279.8	12532888	12534125	723	+	*	-0.7438	-0.7706	0.49	0.34	0.46	0.1	0.77	0.27	0.68	0.05	0.16	0.35	0.34	0.12	7.67	22.8	2.49	19.71	3.28	5.5	3.01	23.2	18.4	3.19	16.22	16.56
cis_mRNA_dw20k	19055	NA	LTCONS_00002453	NM_001264989.1	NC_003279.8	12546607	12549477	2871	+	NC_003279.8	12523211	12527553	1341	+	*	-0.6533	-0.6175	0.49	0.34	0.46	0.1	0.77	0.27	0.68	0.05	0.16	0.35	0.34	0.12	0.48	6.4	0.5	4.32	0	0.19	0	3.38	5.23	0.33	4.68	4.94
cis_mRNA_dw20k	9889	NA	LTCONS_00002453	NM_060782.4	NC_003279.8	12546607	12549477	2871	+	NC_003279.8	12559365	12559658	294	-	*	0.7011	0.7356	0.49	0.34	0.46	0.1	0.77	0.27	0.68	0.05	0.16	0.35	0.34	0.12	443.38	97.16	433.75	98.31	364.91	273.92	455.18	264.22	99.38	348.86	112.62	97.44
cis_mRNA_up10k	2078	NA	LTCONS_00002453	NM_060779.4	NC_003279.8	12546607	12549477	2871	+	NC_003279.8	12551554	12552152	549	+	*	0.858	0.8652	0.49	0.34	0.46	0.1	0.77	0.27	0.68	0.05	0.16	0.35	0.34	0.12	17.29	20.55	20.51	11.34	50.06	13.03	36.33	12.68	11.25	33.4	17.16	11.04
cis_mRNA_dw20k	15856	NA	LTCONS_00002458	NM_001136296.1	NC_003279.8	12560904	12562253	1350	+	NC_003279.8	12578108	12579205	1008	-	*	0.7859	0.7721	0.25	0	0.61	0	0.7	0.15	0.28	0	0.02	0.14	0	0.02	0.7	0.14	1.75	0.12	0.65	0.32	1.21	0.12	0.07	0.28	0.12	0.03
cis_mRNA_dw20k	6721	NA	LTCONS_00002458	NM_001026274.3	NC_003279.8	12560904	12562253	1350	+	NC_003279.8	12568973	12572796	1734	-	*	0.7406	0.6046	0.25	0	0.61	0	0.7	0.15	0.28	0	0.02	0.14	0	0.02	0	0	0.6	0	3.49	1.09	0	0	0	0	0	0.07
cis_mRNA_up10k	1247	NA	LTCONS_00002458	NM_060782.4	NC_003279.8	12560904	12562253	1350	+	NC_003279.8	12559365	12559658	294	-	*	0.7299	0.8023	0.25	0	0.61	0	0.7	0.15	0.28	0	0.02	0.14	0	0.02	443.38	97.16	433.75	98.31	364.91	273.92	455.18	264.22	99.38	348.86	112.62	97.44
cis_mRNA_up10k	233	NA	LTCONS_00002458	NM_060783.5	NC_003279.8	12560904	12562253	1350	+	NC_003279.8	12560412	12560672	261	-	*	0.9229	0.8451	0.25	0	0.61	0	0.7	0.15	0.28	0	0.02	0.14	0	0.02	48.1	6.93	78.55	10.83	93.69	40.03	78.14	21.31	7.03	46.58	6.3	5.92
tran	9997908	NA	LTCONS_00002458	NM_058599.3	NC_003279.8	12560904	12562253	1350	+	NC_003279.8	2562668	2562997	330	+	-522.22	-0.6889	-0.7085	0.25	0	0.61	0	0.7	0.15	0.28	0	0.02	0.14	0	0.02	1.01	13.48	0.48	27.59	0.12	0	0.12	29.51	25.67	0	14.84	20
tran	NA	NA	LTCONS_00002458	NM_068296.5	NC_003279.8	12560904	12562253	1350	+	NC_003282.8	4994371	4994700	330	-	-530.32	-0.7358	-0.6953	0.25	0	0.61	0	0.7	0.15	0.28	0	0.02	0.14	0	0.02	11.16	238.45	4.64	233.34	2.39	1.1	1.84	296.64	238.64	0.06	206.16	231.55
tran	NA	NA	LTCONS_00002458	NM_068298.5	NC_003279.8	12560904	12562253	1350	+	NC_003282.8	4999485	4999814	330	-	-530.32	-0.7358	-0.6953	0.25	0	0.61	0	0.7	0.15	0.28	0	0.02	0.14	0	0.02	11.16	238.45	4.64	233.34	2.39	1.1	1.84	296.64	238.64	0.06	206.16	231.55
tran	NA	NA	LTCONS_00002458	NM_069366.4	NC_003279.8	12560904	12562253	1350	+	NC_003282.8	9850702	9851031	330	-	-570.62	-0.7357	-0.7096	0.25	0	0.61	0	0.7	0.15	0.28	0	0.02	0.14	0	0.02	13.95	196.68	5.94	240.49	5.02	3.36	2.37	269.6	248	2.66	208.44	233.79
cis_mRNA_dw20k	1304	NA	LTCONS_00002462	NM_001136296.1	NC_003279.8	12575211	12576805	1595	+	NC_003279.8	12578108	12579205	1008	-	*	0.6353	0.8909	0.06	0.03	0.25	0.01	0.58	0.03	0.41	0.03	0.01	0.03	0.01	0.01	0.7	0.14	1.75	0.12	0.65	0.32	1.21	0.12	0.07	0.28	0.12	0.03
cis_mRNA_dw20k	14382	NA	LTCONS_00002462	NM_060790.4	NC_003279.8	12575211	12576805	1595	+	NC_003279.8	12591186	12592348	876	-	*	0.7282	0.6889	0.06	0.03	0.25	0.01	0.58	0.03	0.41	0.03	0.01	0.03	0.01	0.01	23.49	2.95	11.71	3.72	21.63	6.54	17.32	2.34	3.57	4.68	2.99	3.26
cis_mRNA_dw20k	3093	NA	LTCONS_00002462	NM_060787.2	NC_003279.8	12575211	12576805	1595	+	NC_003279.8	12579897	12580957	840	-	*	0.8555	0.8733	0.06	0.03	0.25	0.01	0.58	0.03	0.41	0.03	0.01	0.03	0.01	0.01	0.13	0	0.16	0	0.43	0	0.78	0	0	0.03	0	0
cis_mRNA_dw20k	9407	NA	LTCONS_00002462	NM_060785.1	NC_003279.8	12575211	12576805	1595	+	NC_003279.8	12564522	12565805	390	+	*	-0.6219	-0.8339	0.06	0.03	0.25	0.01	0.58	0.03	0.41	0.03	0.01	0.03	0.01	0.01	1.02	1.1	1.59	3.86	1.14	2.44	0.62	1.96	2.94	3.1	3.84	3.25
cis_mRNA_dw20k	10202	NA	LTCONS_00002463	NM_060790.4	NC_003279.8	12578031	12580985	2955	+	NC_003279.8	12591186	12592348	876	-	*	0.7751	0.8422	0.14	0	0.05	0	0.66	0	0.31	0	0	0.03	0	0	23.49	2.95	11.71	3.72	21.63	6.54	17.32	2.34	3.57	4.68	2.99	3.26
cis_mRNA_overlap	0	mRNA-AntiCompleteIn-LncExon	LTCONS_00002463	NM_060787.2	NC_003279.8	12578031	12580985	2955	+	NC_003279.8	12579897	12580957	840	-	-1567.23	0.7575	0.9826	0.14	0	0.05	0	0.66	0	0.31	0	0	0.03	0	0	0.13	0	0.16	0	0.43	0	0.78	0	0	0.03	0	0
cis_mRNA_up10k	5236	NA	LTCONS_00002463	NM_001026273.5	NC_003279.8	12578031	12580985	2955	+	NC_003279.8	12566129	12572796	2766	-	*	0.9646	0.6718	0.14	0	0.05	0	0.66	0	0.31	0	0	0.03	0	0	8.7	5.54	7.25	5.91	19.08	3.67	14.36	6.68	5.78	4.97	7.45	5.91
cis_mRNA_up10k	6396	NA	LTCONS_00002463	NM_060789.2	NC_003279.8	12578031	12580985	2955	+	NC_003279.8	12587380	12591091	2667	+	*	0.9625	0.8425	0.14	0	0.05	0	0.66	0	0.31	0	0	0.03	0	0	0.07	0	0.03	0.04	0.17	0	0.1	0	0.01	0.01	0	0
cis_mRNA_up10k	513	NA	LTCONS_00002506	NM_060839.2	NC_003279.8	12809808	12813892	4085	+	NC_003279.8	12807588	12809296	639	-	*	0.7036	0.7914	0.83	0.65	0.58	0.77	0.64	0.58	0.86	0.68	0.95	0.46	0.75	1.07	0.05	0	0.05	0.73	0	0	0.14	0	0.3	0	0.04	1.05
tran	NA	NA	LTCONS_00002592	MTCONS_00009374	NC_003279.8	13224324	13225796	1292	+	NC_003280.10	2018621	2023951	5147	-	-554.67	0.795	0.9018	3.41	5.51	5.28	2.28	7.95	3.03	5.18	3.77	2.28	2.84	3.58	2.41	0.88	1.09	0.96	0.48	1.06	0.6	1.14	1	0.55	0.61	0.99	0.6
tran	NA	NA	LTCONS_00002592	NM_064731.2	NC_003279.8	13224324	13225796	1292	+	NC_003281.10	57702	58682	579	+	-264.21	0.8117	0.7215	3.41	5.51	5.28	2.28	7.95	3.03	5.18	3.77	2.28	2.84	3.58	2.41	1.24	2.48	2.38	1.28	5.27	0.83	1.93	1.62	1.59	1.15	3.5	1.3
cis_mRNA_dw20k	3181	NA	LTCONS_00002612	NM_001026407.5	NC_003279.8	13300047	13300695	649	+	NC_003279.8	13292626	13296867	2205	+	*	0.7351	0.7619	0.18	0	0	0	0.86	0	0.13	0	0	0	0	0	41.78	25.62	36.55	23.35	45.64	29.02	38.24	24.81	24.05	31.75	30.5	27
cis_mRNA_up10k	5936	NA	LTCONS_00002632	MTCONS_00002635	NC_003279.8	13374523	13374920	398	+	NC_003279.8	13380855	13384386	1392	+	*	0.7924	0.7039	0.19	0	0	0	0.79	0	0.44	0	0	0.27	0.08	0	0.27	0.18	1.39	0.1	2.38	0.19	0.99	0.1	0.19	0.32	0.19	0.1
cis_mRNA_up10k	9585	NA	LTCONS_00002632	MTCONS_00002636	NC_003279.8	13374523	13374920	398	+	NC_003279.8	13384504	13393929	5008	+	*	0.6451	0.6394	0.19	0	0	0	0.79	0	0.44	0	0	0.27	0.08	0	12.25	8.58	14.41	8.15	15.1	12.01	13.01	7.47	9.31	10.72	10.41	10.37
cis_mRNA_dw20k	12875	NA	LTCONS_00002648	NM_001265230.1	NC_003279.8	13425117	13426380	1264	+	NC_003279.8	13411900	13412243	294	+	*	0.8576	0.7067	0.43	0.09	0.74	0.15	1	0.18	0.63	0.18	0.15	0.15	0.23	0.39	0.47	0	0.72	0.36	2.96	0.28	1.3	0.12	0	0.73	0.26	0.42
cis_mRNA_dw20k	155	NA	LTCONS_00002648	NM_060962.3	NC_003279.8	13425117	13426380	1264	+	NC_003279.8	13426534	13428464	372	-	*	0.8654	0.769	0.43	0.09	0.74	0.15	1	0.18	0.63	0.18	0.15	0.15	0.23	0.39	121.82	72.14	142.28	75.03	164.37	113.9	144.99	80.07	70.3	103.64	73.52	74.72
cis_mRNA_overlap	0	Lnc-AntiOverlap-mRNA	LTCONS_00002648	NM_060961.3	NC_003279.8	13425117	13426380	1264	+	NC_003279.8	13424031	13425122	1032	-	*	0.8972	0.6714	0.43	0.09	0.74	0.15	1	0.18	0.63	0.18	0.15	0.15	0.23	0.39	9.23	0.12	10.7	0	12	2.33	7.25	0.05	0	1.64	0	0.02
tran	NA	NA	LTCONS_00002648	MTCONS_00009070	NC_003279.8	13425117	13426380	1264	+	NC_003280.10	530897	537184	1970	-	-519.33	0.8534	0.829	0.43	0.09	0.74	0.15	1	0.18	0.63	0.18	0.15	0.15	0.23	0.39	1.39	0.2	2.24	0.33	2.5	1.14	3.05	0.27	0.13	1.07	0.51	0.55
cis_mRNA_dw20k	4253	NA	LTCONS_00002655	NM_001026662.3	NC_003279.8	13486874	13487515	642	+	NC_003279.8	13491767	13493298	573	-	*	0.719	0.6515	0.61	0.25	0.18	0.16	0.78	0.09	0.27	0.04	0.34	0.29	0.25	0.22	9.27	5.51	9.4	5.11	14.12	4.3	11.81	5.12	5.22	5.76	6.38	4.96
cis_mRNA_dw20k	18814	NA	LTCONS_00002657	NM_001026663.3	NC_003279.8	13492587	13493640	1054	+	NC_003279.8	13512453	13514287	357	-	*	-0.6197	-0.6865	0.08	0.63	0.18	0.43	0.46	0.2	0.1	0.22	0.3	0.08	0.58	0.79	33.38	18.04	41.79	21.06	45.52	54.26	38.63	21.42	20.9	47.02	13.87	19.5
cis_mRNA_up10k	2610	NA	LTCONS_00002657	MTCONS_00005505	NC_003279.8	13492587	13493640	1054	+	NC_003279.8	13477401	13489978	1329	-	*	-0.7106	-0.8301	0.08	0.63	0.18	0.43	0.46	0.2	0.1	0.22	0.3	0.08	0.58	0.79	50.39	21.42	53.19	21.98	46.98	48.47	44.36	22.82	21.87	50.36	21.97	19.38
cis_mRNA_up10k	9406	NA	LTCONS_00002657	NM_060971.1	NC_003279.8	13492587	13493640	1054	+	NC_003279.8	13503045	13506971	705	+	*	0.706	0.7531	0.08	0.63	0.18	0.43	0.46	0.2	0.1	0.22	0.3	0.08	0.58	0.79	1.91	3.69	1.43	4.74	2.18	2.01	1.78	2.62	4.69	1.11	4.28	3.99
cis_mRNA_dw20k	14362	NA	LTCONS_00002680	NM_061002.1	NC_003279.8	13709775	13710310	432	+	NC_003279.8	13724671	13731990	1083	-	*	0.8065	0.7519	0	0.83	0	0.5	0	0	0	0.1	0.46	0.04	0.5	0.66	0.89	2.13	0.98	1.83	0.92	0.41	0.97	1.32	2.59	0.26	2.63	1.69
cis_mRNA_overlap	0	Lnc-Overlap-mRNA	LTCONS_00002680	MTCONS_00002679	NC_003279.8	13709775	13710310	432	+	NC_003279.8	13709697	13719547	6714	+	-193.23	0.8831	0.8351	0	0.83	0	0.5	0	0	0	0.1	0.46	0.04	0.5	0.66	0.14	1.12	0.1	0.44	0.13	0.02	0.19	0.55	0.44	0.03	0.79	0.6
cis_mRNA_up10k	6822	NA	LTCONS_00002680	NM_060999.3	NC_003279.8	13709775	13710310	432	+	NC_003279.8	13692929	13702954	5733	-	*	0.7642	0.7955	0	0.83	0	0.5	0	0	0	0.1	0.46	0.04	0.5	0.66	0.3	1	0.45	0.84	0.69	0.15	0.39	0.83	0.82	0.18	0.92	0.72
cis_mRNA_dw20k	1260	NA	LTCONS_00002692	MTCONS_00005550	NC_003279.8	13794988	13796132	1053	+	NC_003279.8	13797391	13812112	3750	-	*	0.8312	0.7133	2.24	1.07	1.77	0.88	2.59	1.95	2.25	0.87	0.84	1.63	1.3	0.79	17.24	6.87	12.87	7.01	13.13	15.45	17.63	4.62	7.93	13.37	6.71	10.63
cis_mRNA_dw20k	2745	NA	LTCONS_00002692	MTCONS_00002690	NC_003279.8	13794988	13796132	1053	+	NC_003279.8	13773071	13792244	4082	+	*	0.849	0.6154	2.24	1.07	1.77	0.88	2.59	1.95	2.25	0.87	0.84	1.63	1.3	0.79	24.22	14.89	26.08	16.02	24.83	27.29	25.54	13.29	15.39	26.85	15.31	16.16
cis_mRNA_dw20k	6378	NA	LTCONS_00002692	NM_001026499.2	NC_003279.8	13794988	13796132	1053	+	NC_003279.8	13802509	13806790	603	-	*	0.7551	0.6713	2.24	1.07	1.77	0.88	2.59	1.95	2.25	0.87	0.84	1.63	1.3	0.79	20.78	9.48	22.96	12.59	16.84	26.39	20.59	11.77	9.66	21.11	11.37	10.11
tran	NA	NA	LTCONS_00002708	MTCONS_00017889	NC_003279.8	13934606	13935233	628	+	NC_003282.8	3313560	3317375	2469	+	-250.1	0.6258	0.7131	0.38	0	0.03	0	0.39	0.23	0.74	0.04	0.1	0	0	0.18	8.35	2.45	4.51	2.45	6.06	5.09	5.27	2.54	1.96	4.69	1.82	2.5
tran	NA	NA	LTCONS_00002708	MTCONS_00030935	NC_003279.8	13934606	13935233	628	+	NC_003283.11	14197778	14204781	6247	-	-247.15	0.8655	0.7297	0.38	0	0.03	0	0.39	0.23	0.74	0.04	0.1	0	0	0.18	9.7	1.69	3.84	2.62	8.19	5.12	9.26	1.24	2.73	4.42	1.56	2.93
cis_mRNA_dw20k	19003	NA	LTCONS_00002725	NM_061034.6	NC_003279.8	13972147	13973820	1674	+	NC_003279.8	13952178	13953145	741	+	*	0.7587	0.6713	0.35	0.73	0.57	0.58	0.4	0.38	0.44	0.89	0.52	0.37	0.65	0.48	1416.06	2559.36	1304.01	2278.33	1251.12	1396.66	1397.46	2461.86	2358.61	1433.85	2214.61	2188.8
cis_mRNA_up10k	2977	NA	LTCONS_00002725	MTCONS_00002726	NC_003279.8	13972147	13973820	1674	+	NC_003279.8	13976796	13980226	3375	+	*	0.7036	0.8042	0.35	0.73	0.57	0.58	0.4	0.38	0.44	0.89	0.52	0.37	0.65	0.48	0.66	1.53	0.67	0.79	0.69	0.63	0.4	0.96	0.83	0.51	1.24	0.82
cis_mRNA_up10k	4628	NA	LTCONS_00002725	NM_061038.3	NC_003279.8	13972147	13973820	1674	+	NC_003279.8	13978447	13980047	861	+	*	-0.6602	-0.7047	0.35	0.73	0.57	0.58	0.4	0.38	0.44	0.89	0.52	0.37	0.65	0.48	8.38	0	2.79	0.04	2.54	4.31	3.98	0	0	2.41	0.16	0
cis_mRNA_dw20k	15097	NA	LTCONS_00002744	NM_061045.2	NC_003279.8	14058574	14059138	565	+	NC_003279.8	14041627	14043478	1023	+	*	0.9177	0.6284	0.44	0	0.38	0	1.03	0.05	0.16	0	0	0.06	0	0	0.13	0	0	0	0.32	0	0.1	0	0	0	0.02	0
cis_mRNA_dw20k	19142	NA	LTCONS_00002744	NM_061054.6	NC_003279.8	14058574	14059138	565	+	NC_003279.8	14078279	14082347	2133	-	*	0.8073	0.907	0.44	0	0.38	0	1.03	0.05	0.16	0	0	0.06	0	0	21.37	2	18.2	2.69	34.96	11.35	32.31	2.07	2.77	10.59	2.34	2.76
cis_mRNA_dw20k	3752	NA	LTCONS_00002744	NM_061052.3	NC_003279.8	14058574	14059138	565	+	NC_003279.8	14062889	14068765	2169	-	*	0.8423	0.9144	0.44	0	0.38	0	1.03	0.05	0.16	0	0	0.06	0	0	12.99	5.2	10.08	6.46	16.1	8.26	13.73	4.19	6.69	8.32	6.27	5.39
cis_mRNA_up10k	1681	NA	LTCONS_00002744	NM_061049.1	NC_003279.8	14058574	14059138	565	+	NC_003279.8	14054593	14056894	861	-	*	0.8955	0.716	0.44	0	0.38	0	1.03	0.05	0.16	0	0	0.06	0	0	0.06	0	0.22	0	0.94	0	0.29	0.03	0	0.07	0	0.15
cis_mRNA_up10k	283	NA	LTCONS_00002744	MTCONS_00002746	NC_003279.8	14058574	14059138	565	+	NC_003279.8	14059420	14078068	723	+	*	0.8895	0.7239	0.44	0	0.38	0	1.03	0.05	0.16	0	0	0.06	0	0	0	0	0.39	0	2.51	0	0.37	0	0	0.4	0	0
cis_mRNA_up10k	283	NA	LTCONS_00002744	NM_061050.2	NC_003279.8	14058574	14059138	565	+	NC_003279.8	14059420	14060817	387	+	*	0.8476	0.9478	0.44	0	0.38	0	1.03	0.05	0.16	0	0	0.06	0	0	13.31	0.08	9.08	0.08	12.07	2.08	7.87	0	0.08	2.97	0.08	0
cis_mRNA_up10k	8292	NA	LTCONS_00002744	MTCONS_00005581	NC_003279.8	14058574	14059138	565	+	NC_003279.8	14045959	14050283	2671	-	*	-0.7016	-0.892	0.44	0	0.38	0	1.03	0.05	0.16	0	0	0.06	0	0	4.78	13.79	2.75	13.56	2.77	6.26	3.88	12.4	12.54	7.31	16.97	14.21
cis_mRNA_up10k	8292	NA	LTCONS_00002744	NM_061047.5	NC_003279.8	14058574	14059138	565	+	NC_003279.8	14048538	14050283	1107	-	*	-0.6213	-0.8771	0.44	0	0.38	0	1.03	0.05	0.16	0	0	0.06	0	0	14.25	97.53	6.1	65.31	3.5	10.2	6.19	86.78	68.69	22.36	99.46	66.18
cis_mRNA_overlap	0	Lnc-AntiOverlap-mRNA	LTCONS_00002807	MTCONS_00005666	NC_003279.8	14570055	14570637	583	+	NC_003279.8	14567368	14604719	5436	-	-721.92	0.6748	0.6478	0.48	0.05	0.21	0.14	0.63	0	0.62	0	0	0.16	0	0.15	18.96	10.63	19.2	8.27	13.96	14	18.44	9.09	10.07	12.84	9.41	12.01
cis_mRNA_dw20k	4535	NA	LTCONS_00002809	NM_001026531.3	NC_003279.8	14629541	14630092	552	+	NC_003279.8	14634626	14642561	2061	-	*	0.6845	0.7723	0.17	0	0.73	0.1	0.17	0.17	0.22	0.05	0.1	0.17	0	0	52.79	25.25	62.09	26.14	46.98	61.52	53.57	25.9	25.24	58.82	26.96	27.11
cis_mRNA_up10k	4108	NA	LTCONS_00002809	NM_001313524.1	NC_003279.8	14629541	14630092	552	+	NC_003279.8	14621514	14625434	771	-	*	-0.6246	-0.8728	0.17	0	0.73	0.1	0.17	0.17	0.22	0.05	0.1	0.17	0	0	21.35	93.44	15.87	79.97	21.03	17.38	14.72	104.2	80.96	22.44	93.02	71.28
cis_mRNA_up10k	4656	NA	LTCONS_00002809	NM_001313526.1	NC_003279.8	14629541	14630092	552	+	NC_003279.8	14621514	14624886	582	-	*	-0.6012	-0.8297	0.17	0	0.73	0.1	0.17	0.17	0.22	0.05	0.1	0.17	0	0	59.88	684.6	18.06	542.08	40.12	35.56	30.85	789.51	559.74	31.38	531.16	450.18
cis_mRNA_dw20k	13062	NA	LTCONS_00002825	NM_061159.4	NC_003279.8	14708179	14708860	682	+	NC_003279.8	14721921	14724731	1311	-	*	0.693	0.6926	0.91	0.15	0.34	0.11	0.81	0.34	0.34	0.04	0.16	0.04	0.35	0.16	2.4	1.01	2.34	1.65	5.81	1.04	3.77	0.82	1.36	1.4	1.78	1.38
cis_mRNA_dw20k	18019	NA	LTCONS_00002825	NM_061161.1	NC_003279.8	14708179	14708860	682	+	NC_003279.8	14726878	14730719	2175	-	*	0.7939	0.6655	0.91	0.15	0.34	0.11	0.81	0.34	0.34	0.04	0.16	0.04	0.35	0.16	2.62	0.12	2.14	0.2	3.02	0.43	2.62	0.11	0.3	0.69	0.22	0.28
cis_mRNA_dw20k	7832	NA	LTCONS_00002825	MTCONS_00002821	NC_003279.8	14708179	14708860	682	+	NC_003279.8	14675813	14700348	2206	+	*	0.7979	0.6962	0.91	0.15	0.34	0.11	0.81	0.34	0.34	0.04	0.16	0.04	0.35	0.16	2.27	0.33	1.68	0.52	2.11	1.75	1.93	0.28	0.34	1	0.49	0.68
cis_mRNA_up10k	1142	NA	LTCONS_00002836	NM_061163.1	NC_003279.8	14732646	14734095	1193	+	NC_003279.8	14735236	14736945	1299	+	*	0.7528	0.6696	0.51	0.11	1	0.11	2.88	0.26	0.78	0.37	0.19	0.26	0.28	0.09	3.5	2.97	3.92	2.08	4.93	3.83	4.12	2.49	2.7	3.92	2.9	2.72
cis_mRNA_up10k	1928	NA	LTCONS_00002836	NM_061161.1	NC_003279.8	14732646	14734095	1193	+	NC_003279.8	14726878	14730719	2175	-	*	0.7495	0.6714	0.51	0.11	1	0.11	2.88	0.26	0.78	0.37	0.19	0.26	0.28	0.09	2.62	0.12	2.14	0.2	3.02	0.43	2.62	0.11	0.3	0.69	0.22	0.28
cis_mRNA_up10k	7916	NA	LTCONS_00002836	NM_061159.4	NC_003279.8	14732646	14734095	1193	+	NC_003279.8	14721921	14724731	1311	-	*	0.9164	0.6526	0.51	0.11	1	0.11	2.88	0.26	0.78	0.37	0.19	0.26	0.28	0.09	2.4	1.01	2.34	1.65	5.81	1.04	3.77	0.82	1.36	1.4	1.78	1.38
cis_mRNA_up10k	661	NA	LTCONS_00002853	NM_061181.5	NC_003279.8	14806541	14806820	280	+	NC_003279.8	14807480	14815330	2139	+	*	0.8404	0.6976	0	0	0.16	0	0.61	0	0.32	0	0	0	0	0	12.64	8.83	14.58	6.99	20.69	8.56	12.17	6.83	8.16	11.07	8.52	4.51
cis_mRNA_up10k	661	NA	LTCONS_00002853	NM_061182.4	NC_003279.8	14806541	14806820	280	+	NC_003279.8	14807480	14812446	795	+	*	0.6362	0.7343	0	0	0.16	0	0.61	0	0.32	0	0	0	0	0	9.04	3.87	13.94	7.53	12.9	8.59	11.75	5.71	5.91	11.56	3.59	4.03
cis_mRNA_up10k	259	NA	LTCONS_00002864	NM_001026266.2	NC_003279.8	14845429	14846220	792	+	NC_003279.8	14846478	14849860	2295	+	*	0.7293	0.6445	0.29	0.22	0.81	0.12	0.57	0.14	1.3	0.09	0.29	0.15	0.36	0.27	1.39	1.12	0.84	0.67	1.73	0.58	2.02	0.56	0.44	0.24	0.91	0.61
cis_mRNA_dw20k	14076	NA	LTCONS_00002870	NM_061191.3	NC_003279.8	14857080	14857465	386	+	NC_003279.8	14839932	14843005	1590	+	*	-0.6687	-0.7161	0.2	0.66	0.09	0.72	0.28	0	0.09	0.31	0.42	0	0.25	0.09	62.97	29.1	69.82	31.02	50.34	64.83	51.12	27.44	30.45	64.34	29.75	30.66
cis_mRNA_dw20k	18932	NA	LTCONS_00002870	NM_001026695.1	NC_003279.8	14857080	14857465	386	+	NC_003279.8	14876396	14900213	13626	-	*	0.6393	0.709	0.2	0.66	0.09	0.72	0.28	0	0.09	0.31	0.42	0	0.25	0.09	42.68	58.65	33.87	62.42	64.82	17.6	52.01	37.49	67.6	20.75	56.46	60.09
cis_mRNA_dw20k	18932	NA	LTCONS_00002870	NM_061200.4	NC_003279.8	14857080	14857465	386	+	NC_003279.8	14876396	14897362	13947	-	*	0.7031	0.7655	0.2	0.66	0.09	0.72	0.28	0	0.09	0.31	0.42	0	0.25	0.09	25.26	40.96	23.89	47.11	32.87	12.85	27.35	51.45	47.22	16.33	41.17	42.82
cis_mRNA_dw20k	7221	NA	LTCONS_00002870	NM_001026265.2	NC_003279.8	14857080	14857465	386	+	NC_003279.8	14846478	14849860	2637	+	*	0.7569	0.7866	0.2	0.66	0.09	0.72	0.28	0	0.09	0.31	0.42	0	0.25	0.09	24.75	44.62	20.04	38.45	37.73	12.63	32.77	30.05	37.52	14.15	40.37	32.53
cis_mRNA_dw20k	7221	NA	LTCONS_00002870	NM_001265527.1	NC_003279.8	14857080	14857465	386	+	NC_003279.8	14846478	14849860	2460	+	*	0.7658	0.829	0.2	0.66	0.09	0.72	0.28	0	0.09	0.31	0.42	0	0.25	0.09	2.25	4.25	0.55	3.19	4.18	1.1	1.35	3.32	3.39	0.9	2.4	2.62
cis_mRNA_dw20k	5802	NA	LTCONS_00002900	NM_001026711.2	NC_003279.8	14974271	14974878	608	+	NC_003279.8	14967313	14968470	375	+	*	0.7354	0.641	0.25	0.31	0.2	0.47	0.74	0.19	0.39	0.25	0.23	0.15	0.45	0.09	26.48	21.46	28.7	26.04	43.21	15.48	40.09	24.13	22.91	19.85	24.44	21.57
cis_mRNA_up10k	547	NA	LTCONS_00002900	NM_061210.5	NC_003279.8	14974271	14974878	608	+	NC_003279.8	14975424	14980461	1632	+	*	0.635	0.7636	0.25	0.31	0.2	0.47	0.74	0.19	0.39	0.25	0.23	0.15	0.45	0.09	2.39	4.41	2.54	4.22	4.58	0.91	3.8	2.92	3.82	0.87	5.24	3.62
cis_mRNA_dw20k	11547	NA	LTCONS_00002903	NM_061215.3	NC_003279.8	14991510	14994154	2645	+	NC_003279.8	15005700	15013874	6435	-	*	-0.9601	-0.8601	1.48	9.53	2.03	10.95	2.97	2.02	2.54	12.29	9.15	3.79	9.39	9.29	100.23	41.27	104.52	42.83	86.52	98.27	84.54	41.33	46.9	101.62	44.02	43.85
cis_mRNA_dw20k	3853	NA	LTCONS_00002903	NM_061211.2	NC_003279.8	14991510	14994154	2645	+	NC_003279.8	14984178	14987658	723	+	*	-0.732	-0.8516	1.48	9.53	2.03	10.95	2.97	2.02	2.54	12.29	9.15	3.79	9.39	9.29	0.16	0	0.16	0	0.12	0.08	0.04	0	0.11	0.04	0	0
cis_mRNA_up10k	620	NA	LTCONS_00002903	NM_061212.4	NC_003279.8	14991510	14994154	2645	+	NC_003279.8	14994773	15001585	4506	+	*	-0.709	-0.6713	1.48	9.53	2.03	10.95	2.97	2.02	2.54	12.29	9.15	3.79	9.39	9.29	13.5	7.33	9.98	7.13	17.24	7.46	14.92	2.8	6.33	8.32	9.72	6.44
tran	NA	NA	LTCONS_00002903	NM_001083195.1	NC_003279.8	14991510	14994154	2645	+	NC_003282.8	5165511	5165726	216	-	-118.62	0.984	0.7846	1.48	9.53	2.03	10.95	2.97	2.02	2.54	12.29	9.15	3.79	9.39	9.29	2.82	38.96	1.37	45.72	0.85	0	0.91	60.77	38.34	0	41.95	43.19
tran	NA	NA	LTCONS_00002903	NM_062470.3	NC_003279.8	14991510	14994154	2645	+	NC_003280.10	4842608	4842823	216	+	-121.27	0.9873	0.7972	1.48	9.53	2.03	10.95	2.97	2.02	2.54	12.29	9.15	3.79	9.39	9.29	5.8	98.07	1.62	118	1.73	0.24	1.82	145.2	101.53	0.51	94.89	94.95
tran	NA	NA	LTCONS_00002903	NM_062474.4	NC_003279.8	14991510	14994154	2645	+	NC_003280.10	4860145	4860360	216	-	-119.87	0.984	0.6993	1.48	9.53	2.03	10.95	2.97	2.02	2.54	12.29	9.15	3.79	9.39	9.29	7.47	115.51	4.32	157.6	0.49	0.97	0.26	157.5	120.8	0.25	118.88	125.01
tran	NA	NA	LTCONS_00002903	NM_068329.3	NC_003279.8	14991510	14994154	2645	+	NC_003282.8	5162826	5163041	216	-	-117.12	0.9863	0.7692	1.48	9.53	2.03	10.95	2.97	2.02	2.54	12.29	9.15	3.79	9.39	9.29	2.88	97.28	1.64	101.61	0.56	0.49	0.45	129.43	93.1	0.38	86.42	82.44
cis_mRNA_dw20k	3339	NA	LTCONS_00002915	NM_001026264.5	NC_003279.8	15048957	15050456	1500	+	NC_003279.8	15053794	15058764	1665	-	*	0.7936	0.6737	0.26	0.09	0.22	0	0.54	0.03	0.3	0.02	0.05	0.05	0.09	0.05	3.12	2	2.33	2.64	3.79	1.56	3.78	1.74	2.37	1.78	2.83	2.53
cis_mRNA_up10k	9218	NA	LTCONS_00002923	NM_061225.6	NC_003279.8	15061637	15070357	1093	+	NC_003279.8	15051146	15052420	957	-	*	0.6888	0.6242	299.77	441.38	528.84	161.72	685.71	347.46	465.5	537.56	155.99	335.16	241.95	174.1	0	0	0	0	4.43	0.02	0	4	0	0	0	0
cis_mRNA_dw20k	10479	NA	LTCONS_00002924	NM_061226.1	NC_003279.8	15064096	15072274	1648	+	NC_003279.8	15053025	15053618	543	+	*	-0.8106	-0.7133	6093.8	14708.2	7401.79	11235.2	7591.62	6486.66	6239.78	21724.4	12705.3	7196.54	11836.9	14780.7	155.39	50.82	196.92	60.43	139.22	183.49	136.6	51.15	64	172.71	50.26	61.53
cis_mRNA_overlap	0	Lnc-AntiOverlap-mRNA	LTCONS_00002930	NM_058259.4	NC_003279.8	12113	15599	3487	-	NC_003279.8	11641	16585	372	+	-531.65	-0.6179	-0.6993	0.88	0.48	0.52	0.34	0.64	0.49	0.9	0.35	0.46	0.27	0.43	0.53	122.55	152.49	105.26	136.63	89.89	151.78	109.08	129.22	140.79	172.54	148.36	127.4
cis_mRNA_overlap	0	Lnc-Overlap-mRNA	LTCONS_00002931	MTCONS_00002928	NC_003279.8	15839	17041	1203	-	NC_003279.8	4221	32482	6857	-	-453.67	0.714	0.6993	0.89	0.28	0.4	0.27	0.34	0.3	0.85	0.18	0.33	0.12	0.39	0.57	7.16	4.41	6.8	5.54	5.22	5.94	6.91	4.56	5.81	5.61	5.44	8.14
cis_mRNA_up10k	1164	NA	LTCONS_00002937	NM_058263.4	NC_003279.8	33645	39424	5780	-	NC_003279.8	28280	32482	1425	-	*	0.7253	0.7321	0.54	0.52	0.32	0.55	0.56	0.29	0.56	0.63	0.68	0.19	0.46	0.9	4.31	8.11	0.58	10.71	2.19	3.16	4.38	9.48	11.73	2.12	8.08	10.83
cis_mRNA_overlap	0	Lnc-AntiOverlap-mRNA	LTCONS_00002951	NM_182061.4	NC_003279.8	171132	172486	1355	-	NC_003279.8	171340	175932	1686	+	*	0.9156	0.7689	0.15	0.02	0.21	0	0.83	0	0.24	0	0	0.04	0	0	24.65	17.59	26.28	16.15	75.06	8.46	56.19	8.71	15.76	9.12	19.54	15.8
cis_mRNA_overlap	0	Lnc-Overlap-mRNA	LTCONS_00002963	MTCONS_00002962	NC_003279.8	250694	251626	819	-	NC_003279.8	248062	251653	1863	-	-387.26	0.8206	0.8441	1.87	3.11	2.92	2.18	1.68	2.23	1.1	2.82	1.68	2.6	2.66	1.92	1.39	3.27	2.59	1.75	1.38	1.83	1.42	3.31	1.78	1.82	3.37	1.66
tran	32646	NA	LTCONS_00002963	MTCONS_00002954	NC_003279.8	250694	251626	819	-	NC_003279.8	211903	218049	3410	-	-423.79	0.7716	0.711	1.87	3.11	2.92	2.18	1.68	2.23	1.1	2.82	1.68	2.6	2.66	1.92	3.41	3.57	3.84	2.15	2.09	2.87	2.18	3.09	2.37	3.43	3.3	2.07
cis_mRNA_dw20k	5840	NA	LTCONS_00002965	NM_058305.3	NC_003279.8	259968	266512	6545	-	NC_003279.8	252119	254129	1278	+	*	-0.8072	-0.8842	0.33	0.3	0.2	0.49	0.22	0.16	0.27	0.2	0.48	0.27	0.51	0.6	14.29	15.04	24.66	10.95	15.14	21.81	15.97	17.34	10.61	22.59	12.7	10.5
cis_mRNA_up10k	814	NA	LTCONS_00002965	NM_058307.5	NC_003279.8	259968	266512	6545	-	NC_003279.8	254709	259155	1644	-	*	0.8189	0.7333	0.33	0.3	0.2	0.49	0.22	0.16	0.27	0.2	0.48	0.27	0.51	0.6	7.91	23.54	4.83	26.31	5.08	7.72	6.7	13.14	25.41	8.84	25.85	22.84
cis_mRNA_dw20k	16194	NA	LTCONS_00002979	NM_001129070.1	NC_003279.8	326751	327348	598	-	NC_003279.8	343541	348364	1695	-	*	0.6653	0.6456	1.08	0.22	0.5	0.31	1.16	0.94	1.64	0.26	0.18	0.26	0.18	0.19	5.83	1.62	6.04	3.35	4.02	5.87	7.17	1.09	3.73	6.41	1.31	1.66
cis_mRNA_overlap	0	Lnc-AntiOverlap-mRNA	LTCONS_00002979	MTCONS_00000068	NC_003279.8	326751	327348	598	-	NC_003279.8	323736	337720	5617	+	-688.87	0.7418	0.7298	1.08	0.22	0.5	0.31	1.16	0.94	1.64	0.26	0.18	0.26	0.18	0.19	5.15	3.24	5.21	3.93	5.13	4.83	5.34	3.53	3.94	4.85	3.63	4.46
cis_mRNA_up10k	3400	NA	LTCONS_00002979	NM_058315.5	NC_003279.8	326751	327348	598	-	NC_003279.8	318825	323352	2817	-	*	0.6467	0.6281	1.08	0.22	0.5	0.31	1.16	0.94	1.64	0.26	0.18	0.26	0.18	0.19	154.57	88.24	165.69	83.94	153.08	174.55	154.17	93.76	91.56	173.91	81.22	82.15
cis_mRNA_up10k	5266	NA	LTCONS_00002979	NM_058318.3	NC_003279.8	326751	327348	598	-	NC_003279.8	332613	337720	1167	+	*	0.7886	0.7158	1.08	0.22	0.5	0.31	1.16	0.94	1.64	0.26	0.18	0.26	0.18	0.19	27.33	19.27	28.49	17.56	28.47	28.17	29.77	17.3	18.28	27.03	17.68	17.75
cis_mRNA_dw20k	12767	NA	LTCONS_00002981	MTCONS_00000067	NC_003279.8	335027	336444	1418	-	NC_003279.8	321145	322261	1117	+	*	0.7718	0.6925	0.62	0.21	0.54	0.22	0.81	0.63	0.48	0.39	0.2	0.29	0.37	0.56	0.29	0.06	0.07	0.04	0.48	0.12	0.21	0.04	0.09	0.07	0.09	0.13
cis_mRNA_up10k	966	NA	LTCONS_00003016	NM_001261937.1	NC_003279.8	526190	530023	3834	-	NC_003279.8	530988	531885	282	+	*	0.7046	0.7332	0.21	0.02	0.18	0.03	0.88	0.02	0.8	0	0.05	0.04	0.02	0.02	16.51	8.92	7.62	3.64	11.95	0.9	15.56	0.37	4.12	1.25	5.91	2.72
cis_mRNA_dw20k	689	NA	LTCONS_00003029	NM_058360.4	NC_003279.8	629548	630406	239	-	NC_003279.8	631094	636334	1200	-	*	0.6679	0.6224	0.7	0.17	2.37	0.2	0.61	1.69	1.12	0.33	0.86	1.26	1.3	0.21	181.09	163.54	185.7	132.72	164.32	186.27	176.99	154.28	142.84	186.32	151.54	124.54
cis_mRNA_dw20k	13453	NA	LTCONS_00003062	NM_001306305.1	NC_003279.8	848120	849291	1172	-	NC_003279.8	812707	834668	3762	+	*	0.6386	0.6385	0.18	0.32	0.02	0.44	0.14	0.09	0.24	0.18	0.58	0	0.33	0.36	3.35	8.93	0	6.12	5.57	0	4.12	5.65	4.27	0	6.7	4.95
cis_mRNA_dw20k	13453	NA	LTCONS_00003062	NM_001306307.1	NC_003279.8	848120	849291	1172	-	NC_003279.8	823160	834668	3414	+	*	0.7439	0.725	0.18	0.32	0.02	0.44	0.14	0.09	0.24	0.18	0.58	0	0.33	0.36	4.74	8.39	5.97	5.04	3.63	3.97	5.42	4.55	9.42	2.56	6.36	6.12
cis_mRNA_dw20k	6465	NA	LTCONS_00003062	NM_058381.4	NC_003279.8	848120	849291	1172	-	NC_003279.8	838102	841656	2193	+	*	0.8014	0.7706	0.18	0.32	0.02	0.44	0.14	0.09	0.24	0.18	0.58	0	0.33	0.36	2.65	17.99	1.46	13.03	0.66	0.99	1.09	0.73	15.04	0.62	17.2	10.45
cis_mRNA_up10k	1376	NA	LTCONS_00003062	NM_058382.4	NC_003279.8	848120	849291	1172	-	NC_003279.8	841836	846745	1605	-	*	0.7536	0.8301	0.18	0.32	0.02	0.44	0.14	0.09	0.24	0.18	0.58	0	0.33	0.36	4.14	6.11	2.25	5.21	4.06	1.94	4.13	3.57	4.6	2.45	5.25	4.19
cis_mRNA_up10k	1376	NA	LTCONS_00003062	NM_182008.4	NC_003279.8	848120	849291	1172	-	NC_003279.8	842447	846745	1611	-	*	0.8178	0.8697	0.18	0.32	0.02	0.44	0.14	0.09	0.24	0.18	0.58	0	0.33	0.36	0.04	0	0	0.24	0	0	0.08	0.04	0.16	0	0.11	0.12
cis_mRNA_up10k	4169	NA	LTCONS_00003062	NM_058384.3	NC_003279.8	848120	849291	1172	-	NC_003279.8	853459	871818	2295	+	*	-0.734	-0.7333	0.18	0.32	0.02	0.44	0.14	0.09	0.24	0.18	0.58	0	0.33	0.36	58.99	36.25	58.39	33.18	64.91	50.93	63.37	35.8	35.03	61.67	35.03	32.38
cis_mRNA_dw20k	14757	NA	LTCONS_00003063	NM_001306305.1	NC_003279.8	849424	851824	2401	-	NC_003279.8	812707	834668	3762	+	*	0.6542	0.6254	0.21	0.52	0.2	0.43	0.14	0.07	0.21	0.17	0.43	0.13	0.3	0.5	3.35	8.93	0	6.12	5.57	0	4.12	5.65	4.27	0	6.7	4.95
cis_mRNA_dw20k	14757	NA	LTCONS_00003063	NM_001306307.1	NC_003279.8	849424	851824	2401	-	NC_003279.8	823160	834668	3414	+	*	0.7603	0.8421	0.21	0.52	0.2	0.43	0.14	0.07	0.21	0.17	0.43	0.13	0.3	0.5	4.74	8.39	5.97	5.04	3.63	3.97	5.42	4.55	9.42	2.56	6.36	6.12
cis_mRNA_dw20k	7769	NA	LTCONS_00003063	NM_058381.4	NC_003279.8	849424	851824	2401	-	NC_003279.8	838102	841656	2193	+	*	0.86	0.8807	0.21	0.52	0.2	0.43	0.14	0.07	0.21	0.17	0.43	0.13	0.3	0.5	2.65	17.99	1.46	13.03	0.66	0.99	1.09	0.73	15.04	0.62	17.2	10.45
cis_mRNA_up10k	1636	NA	LTCONS_00003063	NM_058384.3	NC_003279.8	849424	851824	2401	-	NC_003279.8	853459	871818	2295	+	*	-0.737	-0.638	0.21	0.52	0.2	0.43	0.14	0.07	0.21	0.17	0.43	0.13	0.3	0.5	58.99	36.25	58.39	33.18	64.91	50.93	63.37	35.8	35.03	61.67	35.03	32.38
cis_mRNA_up10k	2680	NA	LTCONS_00003063	NM_058382.4	NC_003279.8	849424	851824	2401	-	NC_003279.8	841836	846745	1605	-	*	0.7675	0.8842	0.21	0.52	0.2	0.43	0.14	0.07	0.21	0.17	0.43	0.13	0.3	0.5	4.14	6.11	2.25	5.21	4.06	1.94	4.13	3.57	4.6	2.45	5.25	4.19
cis_mRNA_dw20k	12524	NA	LTCONS_00003090	MTCONS_00003096	NC_003279.8	1037238	1038401	1164	-	NC_003279.8	1050924	1066984	2661	-	*	0.7354	0.6538	0.18	0.04	0.09	0.02	0.32	0	0.33	0	0.06	0.1	0.04	0.06	46.09	21.42	46	25.9	57.04	51.87	57.03	18.37	24.96	42.58	24.01	29.59
cis_mRNA_dw20k	15962	NA	LTCONS_00003090	NM_058415.5	NC_003279.8	1037238	1038401	1164	-	NC_003279.8	1054362	1066869	1293	-	*	0.6421	0.6468	0.18	0.04	0.09	0.02	0.32	0	0.33	0	0.06	0.1	0.04	0.06	45.62	33.47	47.97	28.7	46.32	42.2	48.37	30.48	29.67	44.4	30.19	21.29
cis_mRNA_dw20k	18082	NA	LTCONS_00003090	NM_001026570.3	NC_003279.8	1037238	1038401	1164	-	NC_003279.8	1018843	1019157	315	+	*	-0.7562	-0.7874	0.18	0.04	0.09	0.02	0.32	0	0.33	0	0.06	0.1	0.04	0.06	14.31	40.13	4.75	54.84	4.53	28.97	8.72	57.75	46.41	17.55	48	44.39
cis_mRNA_overlap	0	Lnc-AntiOverlap-mRNA	LTCONS_00003090	NM_001306327.1	NC_003279.8	1037238	1038401	1164	-	NC_003279.8	1034473	1040763	2343	+	*	0.7253	0.6021	0.18	0.04	0.09	0.02	0.32	0	0.33	0	0.06	0.1	0.04	0.06	5.91	2.74	9.17	3.95	9.06	4.81	7.68	3.58	4.15	4.17	4.81	3.12
cis_mRNA_dw20k	10219	NA	LTCONS_00003091	MTCONS_00003096	NC_003279.8	1038502	1040706	2205	-	NC_003279.8	1050924	1066984	2661	-	*	0.8189	0.9053	0.18	0.05	0.16	0.1	0.39	0.18	0.5	0.03	0.12	0.17	0.05	0.22	46.09	21.42	46	25.9	57.04	51.87	57.03	18.37	24.96	42.58	24.01	29.59
cis_mRNA_dw20k	19346	NA	LTCONS_00003091	NM_001026570.3	NC_003279.8	1038502	1040706	2205	-	NC_003279.8	1018843	1019157	315	+	*	-0.7051	-0.7333	0.18	0.05	0.16	0.1	0.39	0.18	0.5	0.03	0.12	0.17	0.05	0.22	14.31	40.13	4.75	54.84	4.53	28.97	8.72	57.75	46.41	17.55	48	44.39
cis_mRNA_up10k	779	NA	LTCONS_00003091	MTCONS_00000190	NC_003279.8	1038502	1040706	2205	-	NC_003279.8	1041484	1050638	2979	+	*	0.6719	0.8421	0.18	0.05	0.16	0.1	0.39	0.18	0.5	0.03	0.12	0.17	0.05	0.22	10.36	6.21	8.58	7.05	9.06	12.5	13	5.79	8.17	11.89	7.43	8.25
cis_mRNA_up10k	8898	NA	LTCONS_00003091	NM_058411.5	NC_003279.8	1038502	1040706	2205	-	NC_003279.8	1049603	1050638	318	+	*	-0.6711	-0.7018	0.18	0.05	0.16	0.1	0.39	0.18	0.5	0.03	0.12	0.17	0.05	0.22	64.94	115.73	58.73	96.51	67.58	66.2	65.1	108.47	97.9	85.5	92.95	87.44
cis_mRNA_dw20k	13135	NA	LTCONS_00003098	NM_058414.4	NC_003279.8	1078052	1082548	4497	-	NC_003279.8	1062447	1064918	981	+	*	0.8226	0.8371	0.78	1.71	0.69	1.2	0.57	0.7	0.52	1.21	1.08	0.56	0.92	1.49	0.61	1.75	0.14	1.48	0.72	0.65	0.43	1.59	1.19	0.43	1.41	1.09
cis_mRNA_dw20k	3710	NA	LTCONS_00003098	NM_058416.5	NC_003279.8	1078052	1082548	4497	-	NC_003279.8	1068987	1074343	1137	+	*	0.8282	0.7483	0.78	1.71	0.69	1.2	0.57	0.7	0.52	1.21	1.08	0.56	0.92	1.49	23.76	65.82	17.44	55.85	26.38	12.04	23.37	50.37	55.68	13.56	62.5	51.62
cis_mRNA_dw20k	7521	NA	LTCONS_00003098	NM_058419.4	NC_003279.8	1078052	1082548	4497	-	NC_003279.8	1090068	1095793	1176	-	*	0.7698	0.6503	0.78	1.71	0.69	1.2	0.57	0.7	0.52	1.21	1.08	0.56	0.92	1.49	4.55	11.21	4.03	12.55	4.27	3.62	4.85	7.63	11.37	3.81	13.35	12.26
cis_mRNA_overlap	0	Lnc-AntiCompleteIn-mRNAIntron	LTCONS_00003098	MTCONS_00000197	NC_003279.8	1078052	1082548	4497	-	NC_003279.8	1077207	1088604	984	+	*	-0.6167	-0.6503	0.78	1.71	0.69	1.2	0.57	0.7	0.52	1.21	1.08	0.56	0.92	1.49	0.81	0.19	0.93	0.32	1.45	0.55	1.08	0.37	0.58	0.65	0.09	0.72
cis_mRNA_up10k	2083	NA	LTCONS_00003098	NM_058418.3	NC_003279.8	1078052	1082548	4497	-	NC_003279.8	1084630	1088451	537	+	*	-0.7159	-0.7496	0.78	1.71	0.69	1.2	0.57	0.7	0.52	1.21	1.08	0.56	0.92	1.49	0.92	0.48	1.39	0.64	2.35	0.61	1.85	0.74	0.41	1.6	0.55	0.61
cis_mRNA_up10k	6003	NA	LTCONS_00003098	NM_001262029.1	NC_003279.8	1078052	1082548	4497	-	NC_003279.8	1088550	1089694	393	+	*	0.8451	0.8842	0.78	1.71	0.69	1.2	0.57	0.7	0.52	1.21	1.08	0.56	0.92	1.49	0.66	3.53	0.18	1.08	0.27	0.18	0.09	2.86	3.06	0.09	2.11	2
cis_mRNA_up10k	168	NA	LTCONS_00003100	NM_058419.4	NC_003279.8	1095960	1098504	2545	-	NC_003279.8	1090068	1095793	1176	-	*	0.8117	0.7832	0.09	0.57	0.16	0.81	0.24	0.2	0.32	0.22	0.85	0.17	0.35	0.89	4.55	11.21	4.03	12.55	4.27	3.62	4.85	7.63	11.37	3.81	13.35	12.26
cis_mRNA_dw20k	1250	NA	LTCONS_00003110	NM_058434.4	NC_003279.8	1215045	1217263	234	-	NC_003279.8	1218512	1218976	237	-	-128.71	0.8951	0.9155	0.49	6.18	0.44	8.48	0	0.42	0	0.68	11.26	0	12.9	6.86	54.58	2067.66	49.6	1550.71	1.24	13.28	1.51	444.52	1413.46	12.11	1782.48	1158.35
cis_mRNA_dw20k	4041	NA	LTCONS_00003110	NM_058429.5	NC_003279.8	1215045	1217263	234	-	NC_003279.8	1193198	1211005	2055	+	*	-0.7554	-0.8662	0.49	6.18	0.44	8.48	0	0.42	0	0.68	11.26	0	12.9	6.86	92.73	84.2	95.01	80.04	99.99	87.18	99.46	83.48	79.11	90.92	82.99	79.76
cis_mRNA_overlap	0	Lnc-AntiCompleteIn-mRNAIntron	LTCONS_00003110	NM_058433.3	NC_003279.8	1215045	1217263	234	-	NC_003279.8	1211495	1254499	3060	+	*	-0.6818	-0.669	0.49	6.18	0.44	8.48	0	0.42	0	0.68	11.26	0	12.9	6.86	42.06	28.86	48.6	28.88	47.22	41.22	45.18	24.71	28.89	42.73	31.17	27.05
cis_mRNA_overlap	0	mRNA-CompleteIn-LncExon	LTCONS_00003110	NM_001262043.1	NC_003279.8	1215045	1217263	234	-	NC_003279.8	1215045	1217263	171	-	*	0.8653	0.8836	0.49	6.18	0.44	8.48	0	0.42	0	0.68	11.26	0	12.9	6.86	0	15.41	0.85	20.51	0	0	0	3.73	9.7	0	16.38	14.45
cis_mRNA_overlap	0	Lnc-AntiOverlap-mRNA	LTCONS_00003163	NM_058497.6	NC_003279.8	1809367	1810120	754	-	NC_003279.8	1808119	1811669	975	+	-817.78	0.8016	0.7215	0.11	0.03	0.26	0.33	0.87	0.07	0.3	0.29	0.14	0	0.03	0.21	25.46	25.24	25.71	29.92	42.26	16.3	32.34	25.61	27.79	24.92	29.58	25.99
cis_mRNA_overlap	0	Lnc-AntiOverlap-mRNA	LTCONS_00003177	NM_001129082.2	NC_003279.8	1917565	1919365	696	-	NC_003279.8	1895235	1922952	3339	+	-1031.99	-0.8685	-0.7395	0.34	1.11	0	1.42	0	0.04	0.25	0.9	1.03	0	1.32	0.94	30.03	13.14	27.15	13.29	20.35	32.85	25.61	12.86	15	31.47	14.37	15.41
cis_mRNA_up10k	3660	NA	LTCONS_00003177	NM_170807.5	NC_003279.8	1917565	1919365	696	-	NC_003279.8	1911846	1913906	570	-	*	0.8451	0.8733	0.34	1.11	0	1.42	0	0.04	0.25	0.9	1.03	0	1.32	0.94	71.45	156.29	20.11	179.26	16.2	119.21	29.04	113.24	178.45	102.46	197.04	164.24
cis_mRNA_up10k	4889	NA	LTCONS_00003177	MTCONS_00000343	NC_003279.8	1917565	1919365	696	-	NC_003279.8	1924253	1932243	1756	+	*	-0.9421	-0.7042	0.34	1.11	0	1.42	0	0.04	0.25	0.9	1.03	0	1.32	0.94	28.06	6.06	28.03	6.61	26.5	31.25	26.18	4.93	8.39	25.19	6.49	9.9
cis_mRNA_up10k	5009	NA	LTCONS_00003177	NM_170809.6	NC_003279.8	1917565	1919365	696	-	NC_003279.8	1924373	1932032	1476	+	*	-0.8141	-0.9085	0.34	1.11	0	1.42	0	0.04	0.25	0.9	1.03	0	1.32	0.94	5.46	3.68	9.6	3.5	8.32	7.52	12.95	4.27	3.75	8.04	2.99	4.48
cis_mRNA_overlap	0	Lnc-AntiOverlap-mRNA	LTCONS_00003178	NM_001129082.2	NC_003279.8	1919008	1919365	358	-	NC_003279.8	1895235	1922952	3339	+	-280.78	-0.7033	-0.8023	0	0.28	0.1	0.89	0.1	0.1	0.1	0.6	1.24	0	0.47	0.3	30.03	13.14	27.15	13.29	20.35	32.85	25.61	12.86	15	31.47	14.37	15.41
cis_mRNA_up10k	4889	NA	LTCONS_00003178	MTCONS_00000343	NC_003279.8	1919008	1919365	358	-	NC_003279.8	1924253	1932243	1756	+	*	-0.7357	-0.7238	0	0.28	0.1	0.89	0.1	0.1	0.1	0.6	1.24	0	0.47	0.3	28.06	6.06	28.03	6.61	26.5	31.25	26.18	4.93	8.39	25.19	6.49	9.9
cis_mRNA_up10k	5009	NA	LTCONS_00003178	NM_170809.6	NC_003279.8	1919008	1919365	358	-	NC_003279.8	1924373	1932032	1476	+	*	-0.6105	-0.7167	0	0.28	0.1	0.89	0.1	0.1	0.1	0.6	1.24	0	0.47	0.3	5.46	3.68	9.6	3.5	8.32	7.52	12.95	4.27	3.75	8.04	2.99	4.48
cis_mRNA_up10k	5103	NA	LTCONS_00003178	NM_170807.5	NC_003279.8	1919008	1919365	358	-	NC_003279.8	1911846	1913906	570	-	*	0.6559	0.7274	0	0.28	0.1	0.89	0.1	0.1	0.1	0.6	1.24	0	0.47	0.3	71.45	156.29	20.11	179.26	16.2	119.21	29.04	113.24	178.45	102.46	197.04	164.24
cis_mRNA_up10k	6717	NA	LTCONS_00003197	NM_058529.3	NC_003279.8	2064335	2065973	1639	-	NC_003279.8	2072689	2076100	1029	+	*	-0.7957	-0.814	0.59	0.25	0.23	0.3	0.25	0.21	0.32	0.47	0.38	0.18	0.51	0.51	105.78	118.53	125.74	125.3	118.93	121.7	111.61	119.67	114.2	129.13	113.35	103.03
cis_mRNA_overlap	0	Lnc-AntiOverlap-mRNA	LTCONS_00003214	NM_058546.5	NC_003279.8	2252309	2252706	398	-	NC_003279.8	2250160	2254799	1641	+	-714.8	-0.6041	-0.8155	0.09	0	0.18	0	0.96	0	0.44	0	0	0	0	0	6.7	11.55	3.71	16.58	4.77	8.91	6.61	13.69	15.3	8.69	13.58	16.87
cis_mRNA_up10k	2796	NA	LTCONS_00003219	NM_058550.3	NC_003279.8	2275936	2277052	1117	-	NC_003279.8	2279847	2280800	483	+	*	0.6136	0.9205	0.36	0.04	0.12	0.06	0.31	0.12	0.68	0.1	0.11	0.12	0.02	0.11	14	0.06	5.02	0.12	8.35	5.01	5.79	0.23	0.18	4.92	0	0.06
cis_mRNA_dw20k	1863	NA	LTCONS_00003221	MTCONS_00003223	NC_003279.8	2291566	2295552	3987	-	NC_003279.8	2297414	2306786	4119	-	*	-0.7026	-0.6294	1.9	1.95	1.77	2.01	1.45	1.59	1.71	1.74	2.13	1.36	2.36	2.37	87.2	37.89	92.3	37.41	78.22	111.68	83.37	43.21	40.41	86.83	36.77	45.03
cis_mRNA_dw20k	9165	NA	LTCONS_00003221	NM_058555.8	NC_003279.8	2291566	2295552	3987	-	NC_003279.8	2304716	2306786	1869	-	*	-0.7876	-0.7622	1.9	1.95	1.77	2.01	1.45	1.59	1.71	1.74	2.13	1.36	2.36	2.37	70.64	24.01	72.71	29.65	65.71	62.61	62.86	35.13	34.36	75.27	22.08	24.64
cis_mRNA_dw20k	12873	NA	LTCONS_00003228	NM_058552.4	NC_003279.8	2309473	2310126	654	-	NC_003279.8	2293217	2296601	2367	+	*	0.8255	0.6823	0.23	0.04	0.13	0.04	0.32	0	0.09	0.08	0	0	0	0.09	66.06	36.07	45.24	33.43	74.77	20.24	68.33	27.66	32.93	28.23	33.83	29.31
cis_mRNA_up10k	6414	NA	LTCONS_00003235	MTCONS_00000424	NC_003279.8	2335310	2335768	459	-	NC_003279.8	2342181	2350518	3011	+	*	0.6099	0.7043	0.15	0	0	0	1.07	0	0.21	0	0	0	0	0	2.35	0	1.31	0	1.99	0.75	0.97	0	0	0.62	0.03	0
cis_mRNA_dw20k	4733	NA	LTCONS_00003240	NM_058573.4	NC_003279.8	2415673	2416230	558	-	NC_003279.8	2420962	2421697	618	-	*	0.7657	0.6609	0.17	0	0	0	0.55	0	0.22	0	0	0	0	0	144.49	94.57	184.88	97.24	222.62	141.85	173.01	86.37	97.41	136.08	96.55	94.49
cis_mRNA_dw20k	5822	NA	LTCONS_00003240	NM_001262222.1	NC_003279.8	2415673	2416230	558	-	NC_003279.8	2402235	2409852	1887	+	*	0.6138	0.615	0.17	0	0	0	0.55	0	0.22	0	0	0	0	0	18.95	16.84	23.32	14.01	28.96	24.66	32.31	13.62	12.61	24.87	15.02	14.52
cis_mRNA_up10k	5860	NA	LTCONS_00003264	NM_170830.4	NC_003279.8	2600309	2600924	616	-	NC_003279.8	2606783	2613150	1929	+	*	0.7467	0.6976	0.2	0	0	0	0.58	0	0.05	0	0	0	0	0	17.75	3.58	17.93	4.59	30.95	8.63	25.42	2.18	4.49	9.87	3.71	3.54
cis_mRNA_dw20k	17681	NA	LTCONS_00003268	NM_058610.5	NC_003279.8	2639414	2642442	1435	-	NC_003279.8	2620659	2621734	924	+	*	0.7557	0.6154	5.88	3.59	5.2	1.88	7.77	4.91	5.63	2.22	2.99	4.79	3.48	2.81	158.03	95.71	182.41	97.71	168.83	194.06	163.74	118.2	98.68	185.66	94.63	93.58
cis_mRNA_dw20k	2868	NA	LTCONS_00003268	NM_058618.3	NC_003279.8	2639414	2642442	1435	-	NC_003279.8	2645309	2648038	1035	-	*	-0.7361	-0.6084	5.88	3.59	5.2	1.88	7.77	4.91	5.63	2.22	2.99	4.79	3.48	2.81	3.25	17.68	3.48	12.77	4.75	2.35	3.7	15.67	11.39	2.58	17.87	11.79
cis_mRNA_up10k	299	NA	LTCONS_00003268	NM_058617.2	NC_003279.8	2639414	2642442	1435	-	NC_003279.8	2642740	2643703	762	+	*	0.7763	0.6993	5.88	3.59	5.2	1.88	7.77	4.91	5.63	2.22	2.99	4.79	3.48	2.81	39.4	19.82	50.99	18.44	42.46	45.38	40.54	21.93	19.18	51.31	19.21	18.2
cis_mRNA_dw20k	11173	NA	LTCONS_00003287	NM_001026640.3	NC_003279.8	2744320	2750142	5823	-	NC_003279.8	2761314	2776082	1635	-	*	0.692	0.7817	0.61	0.1	0.35	0.08	0.24	0.15	0.63	0.04	0.08	0.17	0.08	0.12	38.24	24.45	41.03	21.32	35.83	36.66	38.7	26.76	21.41	31.25	35.3	24.13
cis_mRNA_dw20k	11177	NA	LTCONS_00003287	NM_170837.3	NC_003279.8	2744320	2750142	5823	-	NC_003279.8	2761318	2776082	4428	-	*	0.7688	0.838	0.61	0.1	0.35	0.08	0.24	0.15	0.63	0.04	0.08	0.17	0.08	0.12	11.12	5.28	12.53	6.16	12.61	6.62	11.07	4.24	6.59	6.94	3.16	5.87
cis_mRNA_up10k	1825	NA	LTCONS_00003287	NM_058634.4	NC_003279.8	2744320	2750142	5823	-	NC_003279.8	2735546	2742496	1629	-	*	0.8464	0.8451	0.61	0.1	0.35	0.08	0.24	0.15	0.63	0.04	0.08	0.17	0.08	0.12	6.29	1.6	5.39	1.59	6.81	1.75	6.15	1.45	1.72	2.76	1.63	1.55
cis_mRNA_dw20k	19691	NA	LTCONS_00003311	MTCONS_00003318	NC_003279.8	2842150	2849605	7456	-	NC_003279.8	2869295	2875289	2192	-	*	-0.6886	-0.7404	0.34	0.4	0.23	0.37	0.25	0.12	0.37	0.25	0.44	0.11	0.33	0.42	13.3	7.69	17.16	9.51	12.8	15.84	13.84	9.2	7.91	13.96	8.36	9.15
cis_mRNA_dw20k	12854	NA	LTCONS_00003333	NM_001129080.2	NC_003279.8	2927601	2928116	516	-	NC_003279.8	2940969	2941579	255	-	*	-0.6708	-0.7382	0.38	0.22	0.37	0.74	0.12	0.06	0.12	0.37	0.34	0.06	0.5	0.53	0	0	0	0	0	0.36	0.19	0	0	0.37	0	0
cis_mRNA_up10k	1725	NA	LTCONS_00003333	NM_058676.4	NC_003279.8	2927601	2928116	516	-	NC_003279.8	2929840	2931255	414	+	*	-0.618	-0.6397	0.38	0.22	0.37	0.74	0.12	0.06	0.12	0.37	0.34	0.06	0.5	0.53	30.08	25.52	37.96	19.84	36.73	26.51	38.07	24.52	21.55	31.01	22.24	18.95
cis_mRNA_up10k	2086	NA	LTCONS_00003353	NM_171834.3	NC_003279.8	3086922	3088078	1157	-	NC_003279.8	3072239	3084837	1935	-	*	0.8549	0.8536	1.44	1.71	1.11	1.68	1.61	0.81	1.28	1.26	1.5	1.22	1.21	1.44	0.83	1.79	0.48	1.68	1.61	0.35	1.22	0.76	1.72	0.76	1.03	0.76
cis_mRNA_dw20k	7684	NA	LTCONS_00003366	NM_001026622.1	NC_003279.8	3150344	3152081	1349	-	NC_003279.8	3159764	3162135	1983	-	*	-0.62	-0.6573	4.77	8.66	6.79	4.06	3.57	7.8	3.97	8.56	3.93	6.74	7.78	4.4	23.42	26.95	24.05	27.45	43.8	13.3	34.33	15.1	28.57	16.53	31.86	29.58
cis_mRNA_dw20k	17075	NA	LTCONS_00003397	NM_058737.4	NC_003279.8	3310201	3313227	3027	-	NC_003279.8	3287479	3293127	2472	+	*	0.8556	0.7811	0.2	0.56	0.08	0.27	0.15	0.11	0.08	0.36	0.21	0.12	0.31	0.38	0.82	9.68	0.69	6.33	0.46	0.39	0.58	7.25	6.36	0.56	9.96	5.88
cis_mRNA_dw20k	4829	NA	LTCONS_00003397	MTCONS_00003400	NC_003279.8	3310201	3313227	3027	-	NC_003279.8	3318055	3331198	3844	-	*	-0.8413	-0.9123	0.2	0.56	0.08	0.27	0.15	0.11	0.08	0.36	0.21	0.12	0.31	0.38	1.86	0.83	2.43	1.39	2.31	2	3.07	0.8	1.02	2.4	0.8	0.86
cis_mRNA_dw20k	4829	NA	LTCONS_00003397	MTCONS_00003401	NC_003279.8	3310201	3313227	3027	-	NC_003279.8	3318055	3337278	3361	-	*	-0.8204	-0.8406	0.2	0.56	0.08	0.27	0.15	0.11	0.08	0.36	0.21	0.12	0.31	0.38	13.51	7.59	14.44	9.72	18.09	14.6	17.49	8.94	10.06	13.67	8.28	10.34
cis_mRNA_dw20k	9712	NA	LTCONS_00003397	NM_058739.1	NC_003279.8	3310201	3313227	3027	-	NC_003279.8	3299606	3300490	387	+	*	0.8299	0.8632	0.2	0.56	0.08	0.27	0.15	0.11	0.08	0.36	0.21	0.12	0.31	0.38	0.68	4.6	0.28	4.12	0.64	0	0.37	4.15	3.72	0	4.4	2.93
cis_mRNA_up10k	2737	NA	LTCONS_00003397	NM_058740.4	NC_003279.8	3310201	3313227	3027	-	NC_003279.8	3302197	3307465	1890	-	*	0.7845	0.8231	0.2	0.56	0.08	0.27	0.15	0.11	0.08	0.36	0.21	0.12	0.31	0.38	2.54	6.75	1.88	4.42	3.7	1.51	3.3	4.59	5.72	2.66	6.54	4.52
cis_mRNA_dw20k	13544	NA	LTCONS_00003398	NM_058739.1	NC_003279.8	3314033	3315476	1444	-	NC_003279.8	3299606	3300490	387	+	*	0.7631	0.6614	0.14	0.35	0.16	0.44	0.02	0.16	0.18	0.39	0.31	0.17	0.65	0.67	0.68	4.6	0.28	4.12	0.64	0	0.37	4.15	3.72	0	4.4	2.93
cis_mRNA_dw20k	2580	NA	LTCONS_00003398	MTCONS_00003400	NC_003279.8	3314033	3315476	1444	-	NC_003279.8	3318055	3331198	3844	-	*	-0.7739	-0.6912	0.14	0.35	0.16	0.44	0.02	0.16	0.18	0.39	0.31	0.17	0.65	0.67	1.86	0.83	2.43	1.39	2.31	2	3.07	0.8	1.02	2.4	0.8	0.86
cis_mRNA_dw20k	2580	NA	LTCONS_00003398	MTCONS_00003401	NC_003279.8	3314033	3315476	1444	-	NC_003279.8	3318055	3337278	3361	-	*	-0.7836	-0.7321	0.14	0.35	0.16	0.44	0.02	0.16	0.18	0.39	0.31	0.17	0.65	0.67	13.51	7.59	14.44	9.72	18.09	14.6	17.49	8.94	10.06	13.67	8.28	10.34
cis_mRNA_up10k	5715	NA	LTCONS_00003398	MTCONS_00003395	NC_003279.8	3314033	3315476	1444	-	NC_003279.8	3301228	3308319	3509	-	*	0.7728	0.7811	0.14	0.35	0.16	0.44	0.02	0.16	0.18	0.39	0.31	0.17	0.65	0.67	2.2	3.4	1.71	5.24	3.17	1.7	3.12	3.18	4.2	1.48	4.75	4.87
cis_mRNA_up10k	6569	NA	LTCONS_00003398	NM_058740.4	NC_003279.8	3314033	3315476	1444	-	NC_003279.8	3302197	3307465	1890	-	*	0.6567	0.697	0.14	0.35	0.16	0.44	0.02	0.16	0.18	0.39	0.31	0.17	0.65	0.67	2.54	6.75	1.88	4.42	3.7	1.51	3.3	4.59	5.72	2.66	6.54	4.52
cis_mRNA_overlap	0	Lnc-CompleteIn-mRNAIntron	LTCONS_00003403	MTCONS_00003401	NC_003279.8	3333931	3334870	940	-	NC_003279.8	3318055	3337278	3361	-	*	0.8239	0.7193	0.29	0.13	0.37	0.08	0.64	0.31	0.77	0.13	0.24	0.12	0.24	0.14	13.51	7.59	14.44	9.72	18.09	14.6	17.49	8.94	10.06	13.67	8.28	10.34
cis_mRNA_up10k	3498	NA	LTCONS_00003403	NM_058744.1	NC_003279.8	3333931	3334870	940	-	NC_003279.8	3338367	3340025	465	+	*	0.9211	0.7719	0.29	0.13	0.37	0.08	0.64	0.31	0.77	0.13	0.24	0.12	0.24	0.14	7.99	1.51	9.17	2.08	12.03	3.75	14.24	1.38	2.98	4.16	2.36	4.26
cis_mRNA_dw20k	10243	NA	LTCONS_00003408	NM_058744.1	NC_003279.8	3350267	3350550	284	-	NC_003279.8	3338367	3340025	465	+	*	-0.7348	-0.7465	0.83	15.86	0.46	21.44	0	0.3	0	17.68	13.9	0	18.07	17.6	7.99	1.51	9.17	2.08	12.03	3.75	14.24	1.38	2.98	4.16	2.36	4.26
cis_mRNA_dw20k	17219	NA	LTCONS_00003408	NM_058749.4	NC_003279.8	3350267	3350550	284	-	NC_003279.8	3367768	3368550	669	-	*	-0.8796	-0.8028	0.83	15.86	0.46	21.44	0	0.3	0	17.68	13.9	0	18.07	17.6	479.06	139.19	396.54	160.13	352.22	650.72	400.11	203.55	216.21	581.38	110.42	188.4
cis_mRNA_up10k	377	NA	LTCONS_00003408	MTCONS_00003405	NC_003279.8	3350267	3350550	284	-	NC_003279.8	3339541	3349891	3556	-	*	-0.9638	-0.7254	0.83	15.86	0.46	21.44	0	0.3	0	17.68	13.9	0	18.07	17.6	25.42	9.85	26.99	10.43	24.52	30.85	25.77	10.19	11.5	24.74	10.13	12.27
cis_mRNA_up10k	377	NA	LTCONS_00003408	NM_171835.4	NC_003279.8	3350267	3350550	284	-	NC_003279.8	3340559	3349891	2532	-	*	-0.9558	-0.7747	0.83	15.86	0.46	21.44	0	0.3	0	17.68	13.9	0	18.07	17.6	33.9	10.78	31.77	12	29.4	34.38	33.25	13.24	12.68	41.6	10.42	11.37
cis_mRNA_overlap	0	Lnc-AntiOverlap-mRNA	LTCONS_00003426	NM_001026366.1	NC_003279.8	3411168	3412410	486	-	NC_003279.8	3408033	3415070	1107	+	-433.67	0.6867	0.6643	1.58	0.3	1.06	0.17	1.52	0.59	1.65	0.11	0.24	0.41	0.18	0.51	45.68	21.82	51.45	18.54	46.3	58.04	49.56	21.85	21.64	49.34	20.52	20.62
cis_mRNA_up10k	3975	NA	LTCONS_00003426	MTCONS_00003415	NC_003279.8	3411168	3412410	486	-	NC_003279.8	3374308	3407194	6669	-	*	-0.7385	-0.8846	1.58	0.3	1.06	0.17	1.52	0.59	1.65	0.11	0.24	0.41	0.18	0.51	0	0.35	0	0.63	0	0	0	0.61	1.07	0.15	0.83	0.21
cis_mRNA_up10k	7270	NA	LTCONS_00003426	NM_001026364.4	NC_003279.8	3411168	3412410	486	-	NC_003279.8	3419679	3424008	609	+	*	-0.6568	-0.6573	1.58	0.3	1.06	0.17	1.52	0.59	1.65	0.11	0.24	0.41	0.18	0.51	14.33	32.96	10.77	27.61	12.07	7.49	13.07	54.09	29.07	11.3	32.09	28.56
cis_mRNA_up10k	7270	NA	LTCONS_00003426	NM_001026365.3	NC_003279.8	3411168	3412410	486	-	NC_003279.8	3419679	3424008	462	+	*	-0.637	-0.6713	1.58	0.3	1.06	0.17	1.52	0.59	1.65	0.11	0.24	0.41	0.18	0.51	0.78	4.05	0.33	2.91	1.4	0.32	0.74	7.24	2.89	0.46	3.87	3.44
cis_mRNA_dw20k	16719	NA	LTCONS_00003430	NM_058763.6	NC_003279.8	3445339	3445657	319	-	NC_003279.8	3462375	3466288	1407	-	*	0.8157	0.7474	0.13	0	1.01	0	0.86	0.12	0.75	0.31	0	0.51	0.22	0	40.68	18.58	66.62	18.46	55.6	50.19	49.86	19.47	18.6	52.51	18.4	19.21
cis_mRNA_overlap	0	Lnc-AntiCompleteIn-mRNAExon	LTCONS_00003430	NM_058760.2	NC_003279.8	3445339	3445657	319	-	NC_003279.8	3439108	3448983	1926	+	-634.7	0.6309	0.6193	0.13	0	1.01	0	0.86	0.12	0.75	0.31	0	0.51	0.22	0	44.48	21.22	50.09	22.33	37.54	44.27	39	25.09	26.44	45.21	21.38	24.5
cis_mRNA_dw20k	15560	NA	LTCONS_00003431	NM_001026590.5	NC_003279.8	3457158	3457516	359	-	NC_003279.8	3473075	3476291	837	-	*	-0.732	-0.8281	0.22	0.18	0.62	0.18	0.41	0.2	0.72	0.26	0.1	0.64	0	0.1	15.61	496.78	15.47	474.49	2.37	4.71	0.66	92.15	441.57	5.04	513.86	457.41
cis_mRNA_dw20k	4860	NA	LTCONS_00003431	NM_058763.6	NC_003279.8	3457158	3457516	359	-	NC_003279.8	3462375	3466288	1407	-	*	0.7941	0.807	0.22	0.18	0.62	0.18	0.41	0.2	0.72	0.26	0.1	0.64	0	0.1	40.68	18.58	66.62	18.46	55.6	50.19	49.86	19.47	18.6	52.51	18.4	19.21
cis_mRNA_dw20k	8176	NA	LTCONS_00003431	NM_058760.2	NC_003279.8	3457158	3457516	359	-	NC_003279.8	3439108	3448983	1926	+	*	0.7005	0.7158	0.22	0.18	0.62	0.18	0.41	0.2	0.72	0.26	0.1	0.64	0	0.1	44.48	21.22	50.09	22.33	37.54	44.27	39	25.09	26.44	45.21	21.38	24.5
cis_mRNA_dw20k	4959	NA	LTCONS_00003435	NM_058769.3	NC_003279.8	3482659	3482903	245	-	NC_003279.8	3487861	3499706	5211	-	*	0.7652	0.6576	0	0	0	0.17	0.78	0.19	0.4	0	0	0	0	0	0.93	0.09	0.55	0.16	1.38	0.19	0.94	0.11	0.11	0.15	0.16	0.12
cis_mRNA_up10k	4469	NA	LTCONS_00003535	MTCONS_00003533	NC_003279.8	3958410	3959032	623	-	NC_003279.8	3932561	3953942	17468	-	*	0.9335	0.6587	0.97	0.04	0.38	0	0.72	0.09	0.38	0.04	0	0	0	0	1.69	0.52	1.14	0.83	1.63	0.72	1.34	0.4	0.76	0.7	0.66	0.51
cis_mRNA_up10k	1942	NA	LTCONS_00003564	NM_001322671.1	NC_003279.8	4091173	4092238	1066	-	NC_003279.8	4094179	4098110	2082	+	*	0.6627	0.6713	0.13	0.34	0.02	0.55	0.33	0.27	0.1	0.22	0.41	0.74	0.39	0.66	1.71	1.61	0.62	3.99	1.28	1.32	1.41	2.97	3.26	2.42	1.65	3.44
cis_mRNA_dw20k	5726	NA	LTCONS_00003565	MTCONS_00003568	NC_003279.8	4128730	4129195	466	-	NC_003279.8	4134920	4138945	2670	-	*	0.8467	0.7381	0.22	0.25	0.14	0.3	1.05	0.07	0.35	0.3	0	0.07	0.06	0	3.71	2.76	2.81	2.28	5.81	2.17	5.06	2.83	2.03	2.24	2.42	2.33
cis_mRNA_overlap	0	Lnc-AntiOverlap-mRNA	LTCONS_00003594	MTCONS_00000772	NC_003279.8	4295742	4298719	2576	-	NC_003279.8	4298626	4307966	4292	+	*	0.9455	0.683	0.3	0.05	0.26	0.09	0.61	0.11	0.47	0.03	0.09	0.08	0.14	0.1	1.89	0.53	1.73	0.41	3.06	0.88	3.56	0.54	0.48	0.55	0.32	0.72
cis_mRNA_overlap	0	Lnc-AntiOverlap-mRNA	LTCONS_00003594	NM_058947.5	NC_003279.8	4295742	4298719	2576	-	NC_003279.8	4298626	4301781	864	+	*	0.9693	0.634	0.3	0.05	0.26	0.09	0.61	0.11	0.47	0.03	0.09	0.08	0.14	0.1	11.89	2.88	13.98	2.58	33.35	4.59	18.95	2.94	3.02	4.2	2.5	2.47
cis_mRNA_overlap	0	Lnc-Overlap-mRNA	LTCONS_00003610	MTCONS_00003608	NC_003279.8	4449998	4450316	272	-	NC_003279.8	4448728	4457281	4892	-	-129.73	0.802	0.7541	0.38	0	0.9	0.3	0.18	1.01	0	0.14	0	0.18	0.16	0	1.87	1.17	4.15	0.19	0.46	2.76	0	0.34	0	2.63	0.96	0
cis_mRNA_overlap	0	Lnc-Overlap-mRNA	LTCONS_00003610	MTCONS_00003609	NC_003279.8	4449998	4450316	272	-	NC_003279.8	4448728	4462704	7433	-	-137.04	-0.662	-0.6953	0.38	0	0.9	0.3	0.18	1.01	0	0.14	0	0.18	0.16	0	0.34	0.78	0.06	1.01	0.42	0.09	1.22	0.52	1.38	0	1.4	1.1
cis_mRNA_up10k	7076	NA	LTCONS_00003610	NM_001262696.1	NC_003279.8	4449998	4450316	272	-	NC_003279.8	4457391	4469193	993	+	*	0.9311	0.6524	0.38	0	0.9	0.3	0.18	1.01	0	0.14	0	0.18	0.16	0	0	0	0.77	0	0	0.76	0	0	0	0	0	0
cis_mRNA_dw20k	213	NA	LTCONS_00003626	NM_058985.3	NC_003279.8	4552913	4553221	309	-	NC_003279.8	4550478	4552701	1353	+	*	0.6614	0.7686	0.43	0.59	0	0.34	0	0	0	1.18	0.36	0	2.12	0.26	0.4	1.3	0.19	1.29	0.27	0.11	0.15	0.9	1.1	0.1	1.63	1.49
cis_mRNA_up10k	930	NA	LTCONS_00003626	NM_058987.3	NC_003279.8	4552913	4553221	309	-	NC_003279.8	4554150	4555200	822	+	*	0.6593	0.8919	0.43	0.59	0	0.34	0	0	0	1.18	0.36	0	2.12	0.26	0.79	10.94	0.24	8.93	0.31	0	0.13	11.42	8.43	0.07	9.5	8.07
cis_mRNA_dw20k	11213	NA	LTCONS_00003648	NM_059017.6	NC_003279.8	4635815	4637228	800	-	NC_003279.8	4648440	4650702	1290	-	*	-0.8539	-0.6713	14.07	50.62	14.41	64.05	16.07	15.7	15.69	40.62	57.67	12.9	56.01	56.8	48.95	25.56	50.38	29.08	45.49	51.91	52.21	23.46	31.27	47.62	29.38	38.84
cis_mRNA_dw20k	14959	NA	LTCONS_00003648	NM_001047161.1	NC_003279.8	4635815	4637228	800	-	NC_003279.8	4652186	4652906	423	-	*	0.8889	0.8182	14.07	50.62	14.41	64.05	16.07	15.7	15.69	40.62	57.67	12.9	56.01	56.8	16.56	19.88	9.38	33.18	16.15	14.78	11.43	14.74	28.84	11.58	27.78	34.7
cis_mRNA_dw20k	4180	NA	LTCONS_00003648	NM_059013.3	NC_003279.8	4635815	4637228	800	-	NC_003279.8	4641407	4644055	978	-	*	-0.9508	-0.6993	14.07	50.62	14.41	64.05	16.07	15.7	15.69	40.62	57.67	12.9	56.01	56.8	115.02	38.72	124.82	43.57	105.06	122.59	111.03	39.97	46.29	114.25	40.61	44.95
cis_mRNA_dw20k	8510	NA	LTCONS_00003648	NM_059015.4	NC_003279.8	4635815	4637228	800	-	NC_003279.8	4645737	4646957	1038	-	*	0.8929	0.6713	14.07	50.62	14.41	64.05	16.07	15.7	15.69	40.62	57.67	12.9	56.01	56.8	1544.59	3016.29	1537.83	2705.46	1560.83	1764.14	1774.69	3054.92	2895.77	1826.99	2637.54	2577.63
cis_mRNA_overlap	0	Lnc-CompleteIn-mRNAExon	LTCONS_00003648	MTCONS_00003649	NC_003279.8	4635815	4637228	800	-	NC_003279.8	4635815	4640872	2714	-	-329.88	0.9667	0.7273	14.07	50.62	14.41	64.05	16.07	15.7	15.69	40.62	57.67	12.9	56.01	56.8	3.51	13.16	2.13	15.83	1.49	2.41	2.81	9.19	14.73	3.1	16.58	20.13
cis_mRNA_overlap	0	Lnc-Overlap-mRNA	LTCONS_00003648	MTCONS_00003650	NC_003279.8	4635815	4637228	800	-	NC_003279.8	4635815	4640872	1809	-	-329.88	-0.9496	-0.8322	14.07	50.62	14.41	64.05	16.07	15.7	15.69	40.62	57.67	12.9	56.01	56.8	84.4	63.68	86.3	66.03	83.76	87.26	85.24	68.97	63.98	92.44	68.84	69.49
cis_mRNA_overlap	0	mRNA-CompleteIn-LncExon	LTCONS_00003648	NM_059011.5	NC_003279.8	4635815	4637228	800	-	NC_003279.8	4635815	4636341	261	-	-142.03	0.8509	0.7129	14.07	50.62	14.41	64.05	16.07	15.7	15.69	40.62	57.67	12.9	56.01	56.8	0	171.06	0	122.24	0	0	0	161.95	90.17	0	137.14	80.41
cis_mRNA_up10k	2469	NA	LTCONS_00003648	MTCONS_00003643	NC_003279.8	4635815	4637228	800	-	NC_003279.8	4610268	4633347	12591	-	*	-0.9306	-0.7063	14.07	50.62	14.41	64.05	16.07	15.7	15.69	40.62	57.67	12.9	56.01	56.8	33.67	20.62	36.99	19.36	34.15	34.04	34.41	18.2	19.67	30.11	20.95	20.11
cis_mRNA_up10k	2469	NA	LTCONS_00003648	MTCONS_00003644	NC_003279.8	4635815	4637228	800	-	NC_003279.8	4610268	4633347	12663	-	*	-0.8319	-0.7972	14.07	50.62	14.41	64.05	16.07	15.7	15.69	40.62	57.67	12.9	56.01	56.8	27.79	11.52	28.24	12.94	17.5	27.03	27.88	10.25	14.8	28.45	15.75	16.86
cis_mRNA_up10k	7450	NA	LTCONS_00003648	NM_059014.2	NC_003279.8	4635815	4637228	800	-	NC_003279.8	4644677	4645625	480	+	*	-0.8898	-0.6294	14.07	50.62	14.41	64.05	16.07	15.7	15.69	40.62	57.67	12.9	56.01	56.8	14.2	1.81	10.39	3.51	11.79	12.36	15.5	1.61	4.52	11.11	3.3	4.07
cis_mRNA_dw20k	1485	NA	LTCONS_00003658	NM_001025786.2	NC_003279.8	4660801	4663690	2685	-	NC_003279.8	4655370	4659317	2115	+	*	0.8972	0.6014	1.18	0.41	0.68	0.33	1.68	0.51	1.59	0.31	0.19	0.65	0.26	0.22	54.76	34.99	48.98	30.69	87.34	26.08	58.21	28.94	31.4	29.25	33.37	29.84
cis_mRNA_dw20k	1485	NA	LTCONS_00003658	NM_001262753.1	NC_003279.8	4660801	4663690	2685	-	NC_003279.8	4653527	4659317	2247	+	*	0.634	0.7343	1.18	0.41	0.68	0.33	1.68	0.51	1.59	0.31	0.19	0.65	0.26	0.22	76.61	43.53	110.4	45.37	84.53	76.98	81.09	44.47	44.44	85.56	46.01	44.67
cis_mRNA_dw20k	15177	NA	LTCONS_00003658	NM_059014.2	NC_003279.8	4660801	4663690	2685	-	NC_003279.8	4644677	4645625	480	+	*	0.8003	0.7063	1.18	0.41	0.68	0.33	1.68	0.51	1.59	0.31	0.19	0.65	0.26	0.22	14.2	1.81	10.39	3.51	11.79	12.36	15.5	1.61	4.52	11.11	3.3	4.07
cis_mRNA_dw20k	2457	NA	LTCONS_00003658	NM_001025787.2	NC_003279.8	4660801	4663690	2685	-	NC_003279.8	4666146	4671714	4080	-	*	0.7627	0.8531	1.18	0.41	0.68	0.33	1.68	0.51	1.59	0.31	0.19	0.65	0.26	0.22	35.75	20.97	44.15	16.75	40.55	29.84	34.13	19.01	16.77	32.81	21.01	17.17
cis_mRNA_dw20k	12216	NA	LTCONS_00003661	MTCONS_00003664	NC_003279.8	4673287	4674182	896	-	NC_003279.8	4686397	4698582	9061	-	*	0.781	0.7119	0.25	0	0.09	0	0.77	0	0.51	0.05	0	0.42	0	0.03	28.11	5.48	16.11	7.06	26.36	17.86	27.6	6.28	7.46	16.68	5.48	8.71
cis_mRNA_up10k	1574	NA	LTCONS_00003661	NM_001025787.2	NC_003279.8	4673287	4674182	896	-	NC_003279.8	4666146	4671714	4080	-	*	0.6635	0.7179	0.25	0	0.09	0	0.77	0	0.51	0.05	0	0.42	0	0.03	35.75	20.97	44.15	16.75	40.55	29.84	34.13	19.01	16.77	32.81	21.01	17.17
cis_mRNA_up10k	958	NA	LTCONS_00003661	MTCONS_00000849	NC_003279.8	4673287	4674182	896	-	NC_003279.8	4675139	4683978	4396	+	*	0.8198	0.7972	0.25	0	0.09	0	0.77	0	0.51	0.05	0	0.42	0	0.03	0.67	0	1.38	0	1.98	0.47	0.88	0	0.34	1.16	0	0.37
cis_mRNA_dw20k	14802	NA	LTCONS_00003665	MTCONS_00000849	NC_003279.8	4698779	4703257	4479	-	NC_003279.8	4675139	4683978	4396	+	*	0.6824	0.8379	0.85	0.22	0.58	0.16	0.8	0.24	1.01	0.15	0.24	0.3	0.13	0.21	0.67	0	1.38	0	1.98	0.47	0.88	0	0.34	1.16	0	0.37
cis_mRNA_dw20k	14802	NA	LTCONS_00003665	MTCONS_00000850	NC_003279.8	4698779	4703257	4479	-	NC_003279.8	4675139	4683978	5201	+	*	0.8401	0.7636	0.85	0.22	0.58	0.16	0.8	0.24	1.01	0.15	0.24	0.3	0.13	0.21	1.04	0.42	0.67	0.44	1.19	1.07	2.05	0.27	0.51	0.35	0.11	0.68
cis_mRNA_dw20k	6100	NA	LTCONS_00003665	NM_059028.3	NC_003279.8	4698779	4703257	4479	-	NC_003279.8	4709356	4710421	918	-	*	-0.7284	-0.6865	0.85	0.22	0.58	0.16	0.8	0.24	1.01	0.15	0.24	0.3	0.13	0.21	6.56	137.22	3.08	120.99	0.84	0.5	1.23	130.82	117.93	0.12	122.06	112.26
cis_mRNA_up10k	198	NA	LTCONS_00003665	MTCONS_00003664	NC_003279.8	4698779	4703257	4479	-	NC_003279.8	4686397	4698582	9061	-	*	0.919	0.8842	0.85	0.22	0.58	0.16	0.8	0.24	1.01	0.15	0.24	0.3	0.13	0.21	28.11	5.48	16.11	7.06	26.36	17.86	27.6	6.28	7.46	16.68	5.48	8.71
cis_mRNA_up10k	346	NA	LTCONS_00003665	NM_059025.4	NC_003279.8	4698779	4703257	4479	-	NC_003279.8	4686397	4698434	8904	-	*	0.9554	0.62	0.85	0.22	0.58	0.16	0.8	0.24	1.01	0.15	0.24	0.3	0.13	0.21	30.06	12.4	24.49	12.19	32.71	9.89	30.87	9.31	12.04	11.77	14.59	10.84
cis_mRNA_up10k	3508	NA	LTCONS_00003665	NM_059027.3	NC_003279.8	4698779	4703257	4479	-	NC_003279.8	4706764	4708762	894	+	*	0.9192	0.8336	0.85	0.22	0.58	0.16	0.8	0.24	1.01	0.15	0.24	0.3	0.13	0.21	0.74	0	0.73	0.27	1.48	0.15	1.73	0.08	0.28	0.29	0.06	0.41
cis_mRNA_up10k	8152	NA	LTCONS_00003665	MTCONS_00000856	NC_003279.8	4698779	4703257	4479	-	NC_003279.8	4711408	4713567	1482	+	*	-0.6789	-0.7035	0.85	0.22	0.58	0.16	0.8	0.24	1.01	0.15	0.24	0.3	0.13	0.21	0.48	5.58	0.26	3.46	0.24	0	0.07	3.53	3.47	0	6.02	3.62
cis_mRNA_dw20k	6191	NA	LTCONS_00003684	NM_059053.4	NC_003279.8	4815615	4816154	540	-	NC_003279.8	4805624	4809425	1182	+	*	-0.7495	-0.7972	6.51	11.35	5.34	8.73	7.18	5.67	7.42	8	9.23	6.45	11.63	8.55	76.26	35.92	64.04	55.23	63.81	84.69	75.82	35.4	51.45	84.76	47.45	59.92
cis_mRNA_dw20k	656	NA	LTCONS_00003684	MTCONS_00000883	NC_003279.8	4815615	4816154	540	-	NC_003279.8	4814138	4814960	823	+	*	0.7371	0.8105	6.51	11.35	5.34	8.73	7.18	5.67	7.42	8	9.23	6.45	11.63	8.55	0.28	0.35	0.05	0.48	0.35	0	0.31	0.17	0.39	0	0.51	0.15
cis_mRNA_dw20k	9016	NA	LTCONS_00003684	NM_059056.1	NC_003279.8	4815615	4816154	540	-	NC_003279.8	4825169	4826633	1239	-	*	-0.8494	-0.8671	6.51	11.35	5.34	8.73	7.18	5.67	7.42	8	9.23	6.45	11.63	8.55	30.21	16.7	33.33	16.14	29.12	30.9	27.84	18.44	18.53	33.65	17.29	17.04
tran	NA	NA	LTCONS_00003684	MTCONS_00037546	NC_003279.8	4815615	4816154	540	-	NC_003284.9	17687702	17693175	3910	-	-1074.2	0.6491	0.8252	6.51	11.35	5.34	8.73	7.18	5.67	7.42	8	9.23	6.45	11.63	8.55	1.21	1.43	0.51	2.77	0.88	0.29	0.84	1.42	2.26	0.32	1.88	2.49
cis_mRNA_dw20k	7045	NA	LTCONS_00003685	NM_059053.4	NC_003279.8	4816469	4817313	845	-	NC_003279.8	4805624	4809425	1182	+	*	-0.9129	-0.9021	0.62	1.56	0.84	1.14	0.56	0.23	0.55	1.77	1.78	0.48	1.51	0.75	76.26	35.92	64.04	55.23	63.81	84.69	75.82	35.4	51.45	84.76	47.45	59.92
cis_mRNA_dw20k	7857	NA	LTCONS_00003685	NM_059056.1	NC_003279.8	4816469	4817313	845	-	NC_003279.8	4825169	4826633	1239	-	*	-0.7714	-0.6224	0.62	1.56	0.84	1.14	0.56	0.23	0.55	1.77	1.78	0.48	1.51	0.75	30.21	16.7	33.33	16.14	29.12	30.9	27.84	18.44	18.53	33.65	17.29	17.04
cis_mRNA_up10k	9767	NA	LTCONS_00003685	NM_059057.4	NC_003279.8	4816469	4817313	845	-	NC_003279.8	4827079	4829676	2220	+	*	-0.7962	-0.7063	0.62	1.56	0.84	1.14	0.56	0.23	0.55	1.77	1.78	0.48	1.51	0.75	89.66	47.54	107.07	47.9	79.09	101.62	83.56	51.34	47.55	102.07	45.09	50.58
cis_mRNA_dw20k	17064	NA	LTCONS_00003694	MTCONS_00000900	NC_003279.8	4914682	4917930	3249	-	NC_003279.8	4884913	4897619	3829	+	*	0.8414	0.704	1.41	1.17	1.52	0.85	1.65	1.07	1.86	0.96	0.99	0.87	0.87	1.38	4.66	3.56	5.09	3.45	5.75	3.46	6.22	3.13	3.33	3.62	4.43	3.61
cis_mRNA_up10k	467	NA	LTCONS_00003694	NM_001026230.1	NC_003279.8	4914682	4917930	3249	-	NC_003279.8	4918396	4920365	507	+	*	0.6171	0.627	1.41	1.17	1.52	0.85	1.65	1.07	1.86	0.96	0.99	0.87	0.87	1.38	9.7	4.19	11.26	3.98	10.45	10.61	11.25	4.16	3.39	9.74	3.23	3.95
cis_mRNA_up10k	9190	NA	LTCONS_00003697	NM_001306370.1	NC_003279.8	4932068	4932469	402	-	NC_003279.8	4941658	4948941	4626	+	*	0.914	0.6062	0	0.08	0.7	0	0	0.09	0	0.22	0	0	0	0	0	0	1.07	0.4	0	0	0	0.41	0	0	0	0
cis_mRNA_dw20k	6604	NA	LTCONS_00003703	NM_059088.4	NC_003279.8	4957857	4958291	386	-	NC_003279.8	4964894	4967070	1851	-	*	0.8879	0.8741	31.03	14.02	30.15	13.59	21.29	36.64	34.74	13.35	16.99	27.86	12.25	22.4	122.89	82.49	133.42	84.97	103.66	140.57	113.37	77.11	84.84	135.78	84.69	84.98
cis_mRNA_dw20k	8917	NA	LTCONS_00003703	NM_001306368.1	NC_003279.8	4957857	4958291	386	-	NC_003279.8	4934118	4948941	5190	+	*	0.8203	0.8322	31.03	14.02	30.15	13.59	21.29	36.64	34.74	13.35	16.99	27.86	12.25	22.4	11.04	2.88	17.67	1.65	8.32	12.07	8.67	2.84	3.6	9.17	2.17	2.72
cis_mRNA_dw20k	8917	NA	LTCONS_00003703	NM_001306372.1	NC_003279.8	4957857	4958291	386	-	NC_003279.8	4941658	4948941	4620	+	*	-0.8035	-0.6923	31.03	14.02	30.15	13.59	21.29	36.64	34.74	13.35	16.99	27.86	12.25	22.4	1.45	3.64	0.01	2.41	0.96	0.83	1.11	2.33	2.86	1.05	3.4	2.68
cis_mRNA_dw20k	8917	NA	LTCONS_00003703	NM_001306374.1	NC_003279.8	4957857	4958291	386	-	NC_003279.8	4934118	4948941	5184	+	*	0.7329	0.7133	31.03	14.02	30.15	13.59	21.29	36.64	34.74	13.35	16.99	27.86	12.25	22.4	23.77	8.82	26.91	7.45	19.41	15.66	19.52	4.83	8.68	11.87	9.42	7.65
cis_mRNA_dw20k	9717	NA	LTCONS_00003703	NM_059089.1	NC_003279.8	4957857	4958291	386	-	NC_003279.8	4968007	4970245	1467	-	*	-0.888	-0.8462	31.03	14.02	30.15	13.59	21.29	36.64	34.74	13.35	16.99	27.86	12.25	22.4	0.31	4.41	0.1	3.6	0.14	0.07	0.21	3.17	3.14	0.13	4.53	2.84
cis_mRNA_overlap	0	mRNA-CompleteIn-LncExon	LTCONS_00003703	NM_001026492.3	NC_003279.8	4957857	4958291	386	-	NC_003279.8	4957857	4958154	204	-	-82.16	0.663	0.6993	31.03	14.02	30.15	13.59	21.29	36.64	34.74	13.35	16.99	27.86	12.25	22.4	34.94	28.84	32.21	21.79	39.78	40.45	29.17	27.88	18.56	33.4	22.14	26.03
cis_mRNA_up10k	198	NA	LTCONS_00003703	NM_001047193.4	NC_003279.8	4957857	4958291	386	-	NC_003279.8	4951810	4957660	3789	-	*	0.8023	0.6014	31.03	14.02	30.15	13.59	21.29	36.64	34.74	13.35	16.99	27.86	12.25	22.4	121.11	67.98	136.65	61.64	114.54	111.06	104.41	71.07	67.19	120.24	67.23	66.38
cis_mRNA_up10k	4162	NA	LTCONS_00003703	NM_059087.1	NC_003279.8	4957857	4958291	386	-	NC_003279.8	4962452	4964238	1548	+	*	0.8514	0.7063	31.03	14.02	30.15	13.59	21.29	36.64	34.74	13.35	16.99	27.86	12.25	22.4	55.52	38.73	56.09	32.58	52.69	51.96	54.04	34.87	34.49	53.48	35.49	34.9
cis_mRNA_up10k	6389	NA	LTCONS_00003703	NM_001026252.4	NC_003279.8	4957857	4958291	386	-	NC_003279.8	4950804	4951469	504	-	*	0.8097	0.8252	31.03	14.02	30.15	13.59	21.29	36.64	34.74	13.35	16.99	27.86	12.25	22.4	26.34	19.21	26.18	24.04	25.1	25.92	27.45	16.73	22.06	23.56	20.76	23.45
cis_mRNA_up10k	7453	NA	LTCONS_00003703	NM_059083.3	NC_003279.8	4957857	4958291	386	-	NC_003279.8	4949489	4950405	468	-	*	-0.7511	-0.7692	31.03	14.02	30.15	13.59	21.29	36.64	34.74	13.35	16.99	27.86	12.25	22.4	31.06	41.36	29.37	41.52	25.52	33.32	25.31	41.68	36.69	32.56	38.27	36.68
cis_mRNA_up10k	1338	NA	LTCONS_00003728	NM_059112.3	NC_003279.8	5070165	5070874	710	-	NC_003279.8	5058620	5068828	4041	-	*	0.6445	0.6279	0.04	0.22	0.04	0.46	0.49	0.04	0.32	0.07	0.07	0.08	0.3	0.23	9.69	13.56	7.85	13.66	12.77	3.96	9.29	7.32	12.32	4.34	12.46	13.68
cis_mRNA_up10k	580	NA	LTCONS_00003746	MTCONS_00003743	NC_003279.8	5127766	5131344	3579	-	NC_003279.8	5124192	5127187	2248	-	*	-0.7059	-0.7123	0.31	0.5	0.37	0.44	0.43	0.13	0.44	0.3	0.42	0.12	0.5	0.61	26.49	10.1	30.12	10.95	23.12	30.77	22.2	12.17	13.44	29.94	9.29	13.23
cis_mRNA_dw20k	1157	NA	LTCONS_00003766	MTCONS_00000985	NC_003279.8	5262406	5263037	632	-	NC_003279.8	5245781	5261250	7171	+	*	0.636	0.6749	0.38	0	0.19	0.04	0.8	0.05	0.51	0	0.17	0.1	0	0.04	12.41	5.33	12.6	6.25	12.08	11.76	10.53	5.07	5.07	8.87	6.28	6.17
cis_mRNA_dw20k	11734	NA	LTCONS_00003766	MTCONS_00003772	NC_003279.8	5262406	5263037	632	-	NC_003279.8	5274770	5291694	6753	-	*	0.6463	0.8148	0.38	0	0.19	0.04	0.8	0.05	0.51	0	0.17	0.1	0	0.04	29.44	12.18	30.12	13.08	30.13	30.46	31.55	9.67	13.85	27.89	13.6	14.58
cis_mRNA_up10k	5510	NA	LTCONS_00003766	NM_001047169.1	NC_003279.8	5262406	5263037	632	-	NC_003279.8	5255554	5256897	462	-	*	-0.6168	-0.6679	0.38	0	0.19	0.04	0.8	0.05	0.51	0	0.17	0.1	0	0.04	2.52	59.59	1.99	63.24	0.71	0.07	0.71	70.51	58.33	0.37	58.34	52.1
cis_mRNA_up10k	2798	NA	LTCONS_00003778	NM_059158.6	NC_003279.8	5294305	5296090	1786	-	NC_003279.8	5284598	5291508	1692	-	*	0.676	0.7636	0.72	0.82	0.43	0.53	0.23	0.4	0.39	0.38	0.49	0.4	0.76	0.46	96.57	112.09	109.64	104.63	84.01	82.61	79.18	92.43	107.84	87.39	109.39	99.03
cis_mRNA_dw20k	13071	NA	LTCONS_00003805	MTCONS_00001014	NC_003279.8	5385708	5387707	2000	-	NC_003279.8	5368445	5372638	3055	+	*	-0.6512	-0.676	0.3	0.49	0.32	0.64	0.61	0.25	0.39	0.52	0.62	0.33	0.39	0.92	28.67	8.27	36.56	12.07	28.3	34.95	21.67	29.28	11.66	38.68	22.64	14.64
cis_mRNA_dw20k	13374	NA	LTCONS_00003805	MTCONS_00003810	NC_003279.8	5385708	5387707	2000	-	NC_003279.8	5401080	5420692	9135	-	*	0.7181	0.7601	0.3	0.49	0.32	0.64	0.61	0.25	0.39	0.52	0.62	0.33	0.39	0.92	3.41	4.12	2.96	4.84	3.46	2.63	3.6	3	4.26	2.07	4.78	5.31
cis_mRNA_overlap	0	Lnc-Overlap-mRNA	LTCONS_00003805	NM_059182.1	NC_003279.8	5385708	5387707	2000	-	NC_003279.8	5384639	5385737	390	-	*	0.806	0.681	0.3	0.49	0.32	0.64	0.61	0.25	0.39	0.52	0.62	0.33	0.39	0.92	0	0	0	0.08	0	0	0	0	0.17	0	0.08	0.35
cis_mRNA_up10k	1240	NA	LTCONS_00003805	NM_170865.3	NC_003279.8	5385708	5387707	2000	-	NC_003279.8	5373409	5384469	1398	-	*	0.7532	0.8406	0.3	0.49	0.32	0.64	0.61	0.25	0.39	0.52	0.62	0.33	0.39	0.92	28.22	35.94	25.18	44.47	34.64	23.69	30.31	32.68	39.52	33.76	40.01	41.37
cis_mRNA_dw20k	10263	NA	LTCONS_00003806	MTCONS_00003811	NC_003279.8	5387913	5390818	2906	-	NC_003279.8	5401080	5420692	9144	-	*	-0.6585	-0.6947	0.3	0.34	0.43	0.6	0.35	0.17	0.41	0.67	0.45	0.41	0.45	0.57	13.65	5.19	15.05	4.73	12.91	15.38	14.82	4.35	5.85	13.36	4.78	7
cis_mRNA_dw20k	14247	NA	LTCONS_00003834	MTCONS_00003842	NC_003279.8	5469914	5470584	671	-	NC_003279.8	5484830	5486588	941	-	*	0.6007	0.6154	0.18	0.5	0.39	0.46	0.26	0.09	0.13	0.56	0.28	0.14	0.24	0.29	1406.89	2044.05	1582.38	2326.41	1460.74	1382.56	1550.07	2075.96	2144.31	1573.81	2291.23	2171.76
cis_mRNA_dw20k	16875	NA	LTCONS_00003834	NM_001262981.1	NC_003279.8	5469914	5470584	671	-	NC_003279.8	5487458	5488158	225	-	*	0.6132	0.6035	0.18	0.5	0.39	0.46	0.26	0.09	0.13	0.56	0.28	0.14	0.24	0.29	0.26	8.33	0.71	6.79	0	0.68	0.72	8.97	10.64	0	7.88	7.88
cis_mRNA_dw20k	2054	NA	LTCONS_00003834	MTCONS_00003837	NC_003279.8	5469914	5470584	671	-	NC_003279.8	5472637	5484643	5832	-	*	-0.7697	-0.7762	0.18	0.5	0.39	0.46	0.26	0.09	0.13	0.56	0.28	0.14	0.24	0.29	12.63	2.89	9.64	3.5	7.71	15.66	7.31	3.53	4.96	13.57	5.78	6.75
cis_mRNA_dw20k	10363	NA	LTCONS_00003960	MTCONS_00001111	NC_003279.8	5977557	5979052	1496	-	NC_003279.8	5964354	5967195	1935	+	*	0.7124	0.6647	0.56	0.7	0.26	0.74	0.29	0.35	0.61	0.5	0.58	0.14	0.6	0.82	0	2.38	0	1.38	0.1	0	0	1.29	1.54	0	1.45	1.54
cis_mRNA_dw20k	10363	NA	LTCONS_00003960	MTCONS_00001112	NC_003279.8	5977557	5979052	1496	-	NC_003279.8	5964383	5967195	2328	+	*	0.6332	0.7345	0.56	0.7	0.26	0.74	0.29	0.35	0.61	0.5	0.58	0.14	0.6	0.82	0.07	1.12	0	0.49	0	0	0.14	0.87	0.49	0	1.06	0.57
cis_mRNA_dw20k	13375	NA	LTCONS_00003960	MTCONS_00003964	NC_003279.8	5977557	5979052	1496	-	NC_003279.8	5992426	6003637	2566	-	*	0.7749	0.62	0.56	0.7	0.26	0.74	0.29	0.35	0.61	0.5	0.58	0.14	0.6	0.82	1.42	2.61	0.5	2.69	0.89	0.59	1.35	2.83	2.8	1.11	2.32	2.69
cis_mRNA_dw20k	13375	NA	LTCONS_00003960	MTCONS_00003965	NC_003279.8	5977557	5979052	1496	-	NC_003279.8	5992426	6007559	2304	-	*	-0.7592	-0.6434	0.56	0.7	0.26	0.74	0.29	0.35	0.61	0.5	0.58	0.14	0.6	0.82	12.98	6.08	21.24	4.34	16.11	16.97	15.15	4.8	4.84	15.44	5.37	5.88
cis_mRNA_dw20k	14250	NA	LTCONS_00003960	NM_059333.3	NC_003279.8	5977557	5979052	1496	-	NC_003279.8	5993301	6000774	1179	-	*	-0.7507	-0.7343	0.56	0.7	0.26	0.74	0.29	0.35	0.61	0.5	0.58	0.14	0.6	0.82	4.54	1.59	9.91	1.33	11.16	4.26	5.43	5.03	1.37	4.85	2.54	0
cis_mRNA_up10k	4238	NA	LTCONS_00003960	NM_001025792.2	NC_003279.8	5977557	5979052	1496	-	NC_003279.8	5967415	5973320	1293	-	*	0.79	0.8322	0.56	0.7	0.26	0.74	0.29	0.35	0.61	0.5	0.58	0.14	0.6	0.82	0.52	1.27	0.96	1.24	0.76	0.87	1.35	1.18	1.17	0.38	1.29	1.7
cis_mRNA_up10k	7449	NA	LTCONS_00003960	MTCONS_00001117	NC_003279.8	5977557	5979052	1496	-	NC_003279.8	5986500	5992628	3624	+	*	-0.7343	-0.6993	0.56	0.7	0.26	0.74	0.29	0.35	0.61	0.5	0.58	0.14	0.6	0.82	23.89	9.42	28.24	8.1	26.75	20.93	21.7	3.85	9.51	24.69	8.96	7.55
cis_mRNA_up10k	7449	NA	LTCONS_00003960	NM_059330.4	NC_003279.8	5977557	5979052	1496	-	NC_003279.8	5986500	5990342	2352	+	*	-0.7715	-0.6014	0.56	0.7	0.26	0.74	0.29	0.35	0.61	0.5	0.58	0.14	0.6	0.82	1.8	3.96	8.28	3.19	6.57	3.86	3.37	0.32	5.01	12.14	4.73	0.47
cis_mRNA_dw20k	2228	NA	LTCONS_00003996	NM_059368.2	NC_003279.8	6135445	6136989	1493	-	NC_003279.8	6139216	6140444	759	-	*	0.6442	0.7111	0.02	0.26	0.03	0.32	0	0	0.02	0.39	0.14	0	0.28	0.77	0	0.03	0	0	0	0	0	0.03	0	0	0.07	0.04
cis_mRNA_dw20k	8914	NA	LTCONS_00003996	NM_059365.4	NC_003279.8	6135445	6136989	1493	-	NC_003279.8	6123150	6126532	1701	+	*	0.7035	0.7302	0.02	0.26	0.03	0.32	0	0	0.02	0.39	0.14	0	0.28	0.77	29.66	44.21	23.98	45.84	29.9	17.69	24.67	39.66	44.2	20.36	48.86	43.5
cis_mRNA_up10k	1497	NA	LTCONS_00003996	MTCONS_00001155	NC_003279.8	6135445	6136989	1493	-	NC_003279.8	6138485	6139377	841	+	*	0.6594	0.8265	0.02	0.26	0.03	0.32	0	0	0.02	0.39	0.14	0	0.28	0.77	0.07	2.86	0.07	1.66	0	0.07	0	1.9	1.63	0	2.95	1.68
cis_mRNA_up10k	4364	NA	LTCONS_00003996	MTCONS_00001156	NC_003279.8	6135445	6136989	1493	-	NC_003279.8	6141352	6144319	2150	+	*	0.7662	0.79	0.02	0.26	0.03	0.32	0	0	0.02	0.39	0.14	0	0.28	0.77	0.17	3.38	0	2.73	0	0	0.1	2.73	2.86	0.06	4.98	3.72
cis_mRNA_up10k	8521	NA	LTCONS_00003996	NM_059371.4	NC_003279.8	6135445	6136989	1493	-	NC_003279.8	6145509	6146477	459	+	*	0.8375	0.8349	0.02	0.26	0.03	0.32	0	0	0.02	0.39	0.14	0	0.28	0.77	0.15	1.15	0	1.18	0.07	0	0	0.67	0.33	0	0.91	1.17
cis_mRNA_up10k	9688	NA	LTCONS_00003996	NM_001129015.2	NC_003279.8	6135445	6136989	1493	-	NC_003279.8	6146676	6147068	345	+	*	0.8003	0.8708	0.02	0.26	0.03	0.32	0	0	0.02	0.39	0.14	0	0.28	0.77	0.23	5.2	0.11	3.48	0	0	0	3.09	3.04	0	4.45	4.59
cis_mRNA_up10k	8095	NA	LTCONS_00004033	NM_059443.4	NC_003279.8	6395461	6396499	1039	-	NC_003279.8	6404593	6405608	609	+	*	0.6843	0.7461	0.31	0.21	0.41	0.23	0.03	0.13	0.53	0.14	0.21	0.19	0.4	0.32	6.08	3.12	2.84	4.09	2.41	1.07	8.28	0.93	6.85	1.13	7.86	8.78
cis_mRNA_dw20k	2863	NA	LTCONS_00004041	MTCONS_00004043	NC_003279.8	6450028	6451120	1093	-	NC_003279.8	6453982	6458472	2448	-	*	0.6861	0.6133	0.32	0	0.17	0.02	0.88	0	0.5	0.02	0.18	0	0	0.27	32.32	17.45	35.85	19.34	37.49	30.38	37.51	16.13	18.62	26.66	17.57	22.84
cis_mRNA_dw20k	16710	NA	LTCONS_00004045	NM_059466.4	NC_003279.8	6459217	6460660	1444	-	NC_003279.8	6477369	6487085	1680	-	*	0.7288	0.7902	0.37	0.41	0.71	0.27	1.03	0.63	0.84	0.39	0.47	0.32	0.46	0.45	0.26	0.03	0.27	0	0.83	0.26	0.51	0.13	0.37	0	0.71	0
cis_mRNA_up10k	746	NA	LTCONS_00004045	NM_059456.4	NC_003279.8	6459217	6460660	1444	-	NC_003279.8	6457365	6458472	606	-	*	0.795	0.6084	0.37	0.41	0.71	0.27	1.03	0.63	0.84	0.39	0.47	0.32	0.46	0.45	33.05	23.76	40.93	17.37	50.4	44.35	39.43	28.08	22.28	32.94	19.22	21.07
cis_mRNA_dw20k	9188	NA	LTCONS_00004047	MTCONS_00004050	NC_003279.8	6466300	6467604	1305	-	NC_003279.8	6476791	6488918	2857	-	*	-0.7615	-0.7294	0.38	0.57	0.57	0.62	0.14	0.63	0.35	0.51	0.69	0.69	0.71	0.6	0.13	0.24	0.23	0	0.41	0	0.13	0	0	0	0	0
cis_mRNA_dw20k	9188	NA	LTCONS_00004047	NM_059463.5	NC_003279.8	6466300	6467604	1305	-	NC_003279.8	6476791	6488918	2829	-	*	-0.9084	-0.7579	0.38	0.57	0.57	0.62	0.14	0.63	0.35	0.51	0.69	0.69	0.71	0.6	2.66	1.67	2.4	1.72	5.19	0.89	4.54	1.23	0.83	1.09	1.49	1.38
cis_mRNA_dw20k	8542	NA	LTCONS_00004048	NM_059464.4	NC_003279.8	6468039	6468574	536	-	NC_003279.8	6477115	6488918	2625	-	*	0.6191	0.7926	0.42	0.31	0	0.51	0.17	0.17	0.63	0.3	0.43	0.24	0.32	0.55	0.29	0	0	0.08	0	0	0.34	0	0.82	0.02	0	0.75
cis_mRNA_dw20k	18963	NA	LTCONS_00004099	NM_059527.3	NC_003279.8	6710408	6712368	1961	-	NC_003279.8	6731330	6732269	411	-	*	-0.6104	-0.8986	0.3	0	0.16	0	0.9	0.03	0.56	0	0	0.05	0.01	0.05	6.98	42.75	3.71	43.42	2.85	4.56	2.86	35.84	39.75	4.25	34.27	35.18
cis_mRNA_up10k	1780	NA	LTCONS_00004099	NM_059519.4	NC_003279.8	6710408	6712368	1961	-	NC_003279.8	6706812	6708629	1002	-	*	0.786	0.7025	0.3	0	0.16	0	0.9	0.03	0.56	0	0	0.05	0.01	0.05	1.4	0.77	0.75	0.5	2.52	0.16	4.85	0.26	0.47	0.56	0.25	0.94
cis_mRNA_up10k	3629	NA	LTCONS_00004099	MTCONS_00001311	NC_003279.8	6710408	6712368	1961	-	NC_003279.8	6715996	6719186	2483	+	*	0.9263	0.9271	0.3	0	0.16	0	0.9	0.03	0.56	0	0	0.05	0.01	0.05	34.3	13.08	34.37	12.76	53.8	22.83	54.66	9.77	14.92	21.91	14.02	17.18
cis_mRNA_dw20k	15503	NA	LTCONS_00004105	NM_170889.4	NC_003279.8	6736880	6738261	1382	-	NC_003279.8	6753763	6756346	1089	-	*	0.8321	0.6197	0.26	0.05	0.19	0.1	0.3	0.02	0.63	0.02	0.07	0.04	0	0.02	4.11	1.17	2.56	1.63	3.87	2.92	5.15	1.82	1.31	3.17	1.27	1.53
cis_mRNA_dw20k	17695	NA	LTCONS_00004105	MTCONS_00001311	NC_003279.8	6736880	6738261	1382	-	NC_003279.8	6715996	6719186	2483	+	*	0.8809	0.6409	0.26	0.05	0.19	0.1	0.3	0.02	0.63	0.02	0.07	0.04	0	0.02	34.3	13.08	34.37	12.76	53.8	22.83	54.66	9.77	14.92	21.91	14.02	17.18
cis_mRNA_dw20k	19978	NA	LTCONS_00004105	NM_059535.3	NC_003279.8	6736880	6738261	1382	-	NC_003279.8	6758238	6760167	861	-	*	0.6531	0.6549	0.26	0.05	0.19	0.1	0.3	0.02	0.63	0.02	0.07	0.04	0	0.02	9.97	5.36	5.82	6.48	6.53	5.66	8.14	4.6	5.94	5.62	5.92	6.24
cis_mRNA_dw20k	4264	NA	LTCONS_00004105	NM_059531.6	NC_003279.8	6736880	6738261	1382	-	NC_003279.8	6742524	6745324	1839	-	*	0.6454	0.7606	0.26	0.05	0.19	0.1	0.3	0.02	0.63	0.02	0.07	0.04	0	0.02	115.05	28.46	103.38	33.3	109.07	94.83	109.61	29.39	32.66	93	28.44	32.91
cis_mRNA_up10k	3028	NA	LTCONS_00004105	NM_059530.4	NC_003279.8	6736880	6738261	1382	-	NC_003279.8	6741288	6741764	426	+	*	0.6504	0.6831	0.26	0.05	0.19	0.1	0.3	0.02	0.63	0.02	0.07	0.04	0	0.02	45.55	41.92	63.72	49.42	97.34	41.05	69.6	40.04	44.68	50.38	47.05	42.24
cis_mRNA_dw20k	10017	NA	LTCONS_00004127	NM_059558.1	NC_003279.8	6834470	6835868	1399	-	NC_003279.8	6845884	6846952	1026	-	*	0.7487	0.7391	0.22	0.46	0.44	0.56	0.11	0.16	0.44	0.57	0.51	0.04	0.52	0.67	0.68	8.04	0.57	6.61	1.93	0.08	0.52	6.22	6.09	0.33	7.41	6.62
cis_mRNA_dw20k	69	NA	LTCONS_00004127	NM_059552.3	NC_003279.8	6834470	6835868	1399	-	NC_003279.8	6814530	6834402	3663	+	*	-0.6827	-0.7496	0.22	0.46	0.44	0.56	0.11	0.16	0.44	0.57	0.51	0.04	0.52	0.67	67.95	37	76.13	35	73.89	55.99	69.96	33.06	36.02	63.45	41.71	36.98
cis_mRNA_up10k	2487	NA	LTCONS_00004127	NM_059555.1	NC_003279.8	6834470	6835868	1399	-	NC_003279.8	6838354	6843100	2796	+	*	-0.7994	-0.7671	0.22	0.46	0.44	0.56	0.11	0.16	0.44	0.57	0.51	0.04	0.52	0.67	82.73	29.37	83.61	29.7	74.1	89.35	74.01	34.54	35.51	83.92	30.19	33.98
cis_mRNA_up10k	2487	NA	LTCONS_00004127	NM_059556.3	NC_003279.8	6834470	6835868	1399	-	NC_003279.8	6838354	6843100	2784	+	*	-0.6798	-0.683	0.22	0.46	0.44	0.56	0.11	0.16	0.44	0.57	0.51	0.04	0.52	0.67	82.33	47.5	84.12	49.04	94.94	71.62	89.55	38.49	47.09	73.04	49.67	50.68
cis_mRNA_up10k	618	NA	LTCONS_00004127	NM_059554.6	NC_003279.8	6834470	6835868	1399	-	NC_003279.8	6836485	6837934	1314	+	*	0.7278	0.697	0.22	0.46	0.44	0.56	0.11	0.16	0.44	0.57	0.51	0.04	0.52	0.67	693.64	2960.6	501.01	2391.45	530.9	523.47	560.55	1802.67	2432.99	499.17	2819.92	2255.47
cis_mRNA_dw20k	12654	NA	LTCONS_00004129	NM_059552.3	NC_003279.8	6847055	6847292	238	-	NC_003279.8	6814530	6834402	3663	+	*	-0.7108	-0.7133	1.65	4.11	2.98	14.17	3.07	0.81	2.35	7.12	12.26	1.05	3.36	12.45	67.95	37	76.13	35	73.89	55.99	69.96	33.06	36.02	63.45	41.71	36.98
cis_mRNA_dw20k	3956	NA	LTCONS_00004129	NM_059555.1	NC_003279.8	6847055	6847292	238	-	NC_003279.8	6838354	6843100	2796	+	*	-0.734	-0.8252	1.65	4.11	2.98	14.17	3.07	0.81	2.35	7.12	12.26	1.05	3.36	12.45	82.73	29.37	83.61	29.7	74.1	89.35	74.01	34.54	35.51	83.92	30.19	33.98
cis_mRNA_dw20k	3956	NA	LTCONS_00004129	NM_059556.3	NC_003279.8	6847055	6847292	238	-	NC_003279.8	6838354	6843100	2784	+	*	-0.6438	-0.6224	1.65	4.11	2.98	14.17	3.07	0.81	2.35	7.12	12.26	1.05	3.36	12.45	82.33	47.5	84.12	49.04	94.94	71.62	89.55	38.49	47.09	73.04	49.67	50.68
cis_mRNA_dw20k	9122	NA	LTCONS_00004129	NM_059554.6	NC_003279.8	6847055	6847292	238	-	NC_003279.8	6836485	6837934	1314	+	*	0.6381	0.7133	1.65	4.11	2.98	14.17	3.07	0.81	2.35	7.12	12.26	1.05	3.36	12.45	693.64	2960.6	501.01	2391.45	530.9	523.47	560.55	1802.67	2432.99	499.17	2819.92	2255.47
cis_mRNA_up10k	104	NA	LTCONS_00004129	NM_059558.1	NC_003279.8	6847055	6847292	238	-	NC_003279.8	6845884	6846952	1026	-	*	0.6747	0.7972	1.65	4.11	2.98	14.17	3.07	0.81	2.35	7.12	12.26	1.05	3.36	12.45	0.68	8.04	0.57	6.61	1.93	0.08	0.52	6.22	6.09	0.33	7.41	6.62
cis_mRNA_up10k	303	NA	LTCONS_00004129	NM_059559.4	NC_003279.8	6847055	6847292	238	-	NC_003279.8	6847594	6849780	1818	+	*	-0.7363	-0.8601	1.65	4.11	2.98	14.17	3.07	0.81	2.35	7.12	12.26	1.05	3.36	12.45	78.34	49.12	96.32	45.72	76.63	85.27	68.35	53.97	47.28	84.14	47.03	44.66
cis_mRNA_up10k	3133	NA	LTCONS_00004129	NM_059560.3	NC_003279.8	6847055	6847292	238	-	NC_003279.8	6850424	6851149	636	+	*	-0.704	-0.7343	1.65	4.11	2.98	14.17	3.07	0.81	2.35	7.12	12.26	1.05	3.36	12.45	175.64	132.64	188.5	134.11	171.42	175.76	171.11	129.89	134	198	126.88	128.27
cis_mRNA_up10k	4090	NA	LTCONS_00004129	NM_059561.4	NC_003279.8	6847055	6847292	238	-	NC_003279.8	6851381	6854064	1893	+	*	-0.6776	-0.69	1.65	4.11	2.98	14.17	3.07	0.81	2.35	7.12	12.26	1.05	3.36	12.45	63.55	28.62	74.32	28.34	75.84	53.78	64.3	26.41	28.65	58.29	29.21	28.62
cis_mRNA_dw20k	11676	NA	LTCONS_00004172	MTCONS_00001377	NC_003279.8	7059909	7061239	817	-	NC_003279.8	7043167	7048234	2686	+	*	0.6672	0.7343	0.31	3.97	0.44	1.35	0.41	0.03	0.81	2.47	1.75	0.04	2.62	1.39	1.62	2.23	0.71	1.95	1.12	0.46	1.67	1.42	2.38	0.27	1.78	2.28
cis_mRNA_dw20k	1293	NA	LTCONS_00004172	NM_001026476.3	NC_003279.8	7059909	7061239	817	-	NC_003279.8	7057208	7058617	1158	+	*	-0.7808	-0.7063	0.31	3.97	0.44	1.35	0.41	0.03	0.81	2.47	1.75	0.04	2.62	1.39	179.85	104.54	177.38	92.62	192.97	167.79	171.85	90.81	104.36	196.24	100.26	91.05
cis_mRNA_dw20k	14684	NA	LTCONS_00004172	MTCONS_00004175	NC_003279.8	7059909	7061239	817	-	NC_003279.8	7075922	7081500	2792	-	*	-0.7422	-0.7426	0.31	3.97	0.44	1.35	0.41	0.03	0.81	2.47	1.75	0.04	2.62	1.39	72.17	35.22	65.65	33.75	65.9	72.17	89.33	27.6	42.57	58.93	41.56	52.38
cis_mRNA_dw20k	14705	NA	LTCONS_00004172	NM_059603.6	NC_003279.8	7059909	7061239	817	-	NC_003279.8	7075943	7079438	1257	-	*	0.9524	0.9387	0.31	3.97	0.44	1.35	0.41	0.03	0.81	2.47	1.75	0.04	2.62	1.39	0.07	0.99	0.05	0.48	0.31	0	0.27	0.54	0.48	0.02	0.74	0.56
cis_mRNA_dw20k	19178	NA	LTCONS_00004172	NM_059604.5	NC_003279.8	7059909	7061239	817	-	NC_003279.8	7080416	7081500	570	-	*	-0.6791	-0.6434	0.31	3.97	0.44	1.35	0.41	0.03	0.81	2.47	1.75	0.04	2.62	1.39	283.72	223.26	338.59	222.4	403.81	281.23	326.27	212.71	234.05	319.73	215.8	201.99
cis_mRNA_dw20k	615	NA	LTCONS_00004172	NM_001129054.2	NC_003279.8	7059909	7061239	817	-	NC_003279.8	7057208	7059295	1257	+	*	-0.8127	-0.8951	0.31	3.97	0.44	1.35	0.41	0.03	0.81	2.47	1.75	0.04	2.62	1.39	37.53	13.66	31.25	14.31	23.57	37.02	26.48	17.43	13.68	37.29	11.58	16.69
cis_mRNA_dw20k	6998	NA	LTCONS_00004172	NM_059600.4	NC_003279.8	7059909	7061239	817	-	NC_003279.8	7068236	7069175	519	-	*	0.8389	0.7832	0.31	3.97	0.44	1.35	0.41	0.03	0.81	2.47	1.75	0.04	2.62	1.39	141.21	243.45	150.02	237.82	127.27	147.76	124.63	234.63	222.73	149.84	253.93	216.39
cis_mRNA_up10k	3161	NA	LTCONS_00004172	MTCONS_00004170	NC_003279.8	7059909	7061239	817	-	NC_003279.8	7053773	7056749	1125	-	*	-0.7087	-0.6154	0.31	3.97	0.44	1.35	0.41	0.03	0.81	2.47	1.75	0.04	2.62	1.39	16.99	8.73	26.9	7.77	23.98	17.33	21.8	8.35	8.52	18.35	9.64	9.04
cis_mRNA_up10k	8204	NA	LTCONS_00004172	NM_059601.6	NC_003279.8	7059909	7061239	817	-	NC_003279.8	7069442	7070586	936	+	*	-0.8384	-0.9021	0.31	3.97	0.44	1.35	0.41	0.03	0.81	2.47	1.75	0.04	2.62	1.39	77.37	31.72	89.02	34.62	69.19	92.85	77.11	35.49	33.76	84.91	29.04	36.45
cis_mRNA_dw20k	21	NA	LTCONS_00004182	MTCONS_00001390	NC_003279.8	7099007	7100433	1130	-	NC_003279.8	7095488	7098987	2637	+	*	0.8521	0.8406	4.62	2.83	3.95	1.29	4.62	3.94	4.74	1.57	2.24	3.02	2.2	2.98	35.54	19.5	49.49	22.64	50.52	35.57	50.59	18.18	20.23	35.66	21.08	23.83
cis_mRNA_dw20k	928	NA	LTCONS_00004182	NM_059608.4	NC_003279.8	7099007	7100433	1130	-	NC_003279.8	7095488	7098080	1821	+	*	0.827	0.8301	4.62	2.83	3.95	1.29	4.62	3.94	4.74	1.57	2.24	3.02	2.2	2.98	35.69	22	39.03	19.14	47.02	32.65	33.7	20.09	22.46	37.62	21.43	21.11
cis_mRNA_up10k	4497	NA	LTCONS_00004182	NM_001263462.1	NC_003279.8	7099007	7100433	1130	-	NC_003279.8	7091461	7094511	2328	-	*	0.8271	0.8511	4.62	2.83	3.95	1.29	4.62	3.94	4.74	1.57	2.24	3.02	2.2	2.98	34.17	24.99	44.01	19.13	42.59	32.02	33.29	22.78	20.52	32.65	22.94	22.36
cis_mRNA_up10k	4887	NA	LTCONS_00004182	NM_059612.1	NC_003279.8	7099007	7100433	1130	-	NC_003279.8	7105319	7106725	909	+	*	-0.7158	-0.8056	4.62	2.83	3.95	1.29	4.62	3.94	4.74	1.57	2.24	3.02	2.2	2.98	19.22	621.08	14.69	626.9	1.88	3.35	1.07	153.26	655.33	2.05	613.96	540.46
tran	NA	NA	LTCONS_00004182	MTCONS_00015581	NC_003279.8	7099007	7100433	1130	-	NC_003281.10	4752009	4754046	1580	-	-405.63	0.72	0.7566	4.62	2.83	3.95	1.29	4.62	3.94	4.74	1.57	2.24	3.02	2.2	2.98	100.57	89.23	142.19	96.51	149.7	111.89	152.6	81.88	85.47	126.53	88.16	77.06
cis_mRNA_dw20k	18667	NA	LTCONS_00004198	NM_059629.1	NC_003279.8	7157488	7159287	1800	-	NC_003279.8	7177953	7179430	1338	-	*	0.7436	0.7093	0.64	0.66	0.99	0.58	0.62	0.58	0.81	0.4	0.62	0.68	0.51	0.71	0	0	0.25	0	0	0	0.36	0	0	0.09	0	0
cis_mRNA_up10k	769	NA	LTCONS_00004198	NM_001322686.1	NC_003279.8	7157488	7159287	1800	-	NC_003279.8	7152911	7156720	3171	-	*	0.6172	0.6316	0.64	0.66	0.99	0.58	0.62	0.58	0.81	0.4	0.62	0.68	0.51	0.71	62.86	20.31	75.78	18.76	66.59	58.71	64.3	16.52	24.03	60.11	20.54	22.29
cis_mRNA_dw20k	16976	NA	LTCONS_00004213	NM_001037880.2	NC_003279.8	7237927	7238686	760	-	NC_003279.8	7214967	7220952	1320	+	*	0.6196	0.7923	0.11	0.03	0.07	0.1	0.07	0.11	0.11	0.49	0	0	0.07	0.04	3.19	0.04	3.09	1.67	2.71	2.78	3.84	4.05	2.09	1.08	1.58	1.06
cis_mRNA_dw20k	1045	NA	LTCONS_00004225	NM_001026227.2	NC_003279.8	7278710	7279609	512	-	NC_003279.8	7280653	7282871	1737	-	*	-0.8998	-0.9021	1.27	17.98	0.25	11.18	0.99	0.06	0.67	13.02	12.51	0.13	20.16	12.68	17.51	9.69	13.99	11.64	15.9	20.59	19.01	10.6	10.23	18.59	9.41	12.82
cis_mRNA_dw20k	1045	NA	LTCONS_00004225	NM_001026228.1	NC_003279.8	7278710	7279609	512	-	NC_003279.8	7280653	7282871	1713	-	*	-0.9286	-0.7902	1.27	17.98	0.25	11.18	0.99	0.06	0.67	13.02	12.51	0.13	20.16	12.68	28.87	4.62	29.16	5	22.45	26.82	24.62	3.34	7.89	26.3	7.1	6.86
cis_mRNA_dw20k	17337	NA	LTCONS_00004225	MTCONS_00004234	NC_003279.8	7278710	7279609	512	-	NC_003279.8	7296945	7304687	4789	-	*	-0.9315	-0.9091	1.27	17.98	0.25	11.18	0.99	0.06	0.67	13.02	12.51	0.13	20.16	12.68	22.35	13.84	22.32	14.5	21.71	26.28	23.37	12.49	14.33	22.89	13.67	16.29
cis_mRNA_dw20k	193	NA	LTCONS_00004225	NM_059655.4	NC_003279.8	7278710	7279609	512	-	NC_003279.8	7279801	7280311	393	-	*	-0.8164	-0.9021	1.27	17.98	0.25	11.18	0.99	0.06	0.67	13.02	12.51	0.13	20.16	12.68	69.78	61.09	64.62	67.83	75.33	84.43	79.45	55.16	63.83	82.04	55.49	64.14
cis_mRNA_dw20k	3522	NA	LTCONS_00004225	NM_059657.4	NC_003279.8	7278710	7279609	512	-	NC_003279.8	7283130	7283740	381	-	*	-0.9148	-0.8392	1.27	17.98	0.25	11.18	0.99	0.06	0.67	13.02	12.51	0.13	20.16	12.68	174.57	130.55	208.19	142.91	194.7	169.65	175.61	135.01	135.19	190.45	127.16	151.21
cis_mRNA_dw20k	13759	NA	LTCONS_00004247	MTCONS_00001433	NC_003279.8	7322276	7323590	626	-	NC_003279.8	7304858	7308518	2444	+	*	-0.8372	-0.8462	0.48	1.77	0.54	1.71	0.57	0.09	0.33	0.82	2.16	0.4	2.37	2.25	19.75	7.59	19.46	7.78	14.9	27.05	19.25	8.18	7.9	22.55	7.75	11.06
cis_mRNA_dw20k	13759	NA	LTCONS_00004247	NM_059666.5	NC_003279.8	7322276	7323590	626	-	NC_003279.8	7307117	7308518	618	+	*	0.8774	0.8792	0.48	1.77	0.54	1.71	0.57	0.09	0.33	0.82	2.16	0.4	2.37	2.25	7.6	15.58	6.3	15.66	3.98	0	0	16.63	14.02	4.54	19.45	17.44
cis_mRNA_dw20k	4228	NA	LTCONS_00004247	NM_059670.4	NC_003279.8	7322276	7323590	626	-	NC_003279.8	7317648	7318049	333	+	*	-0.6658	-0.7622	0.48	1.77	0.54	1.71	0.57	0.09	0.33	0.82	2.16	0.4	2.37	2.25	236.07	212.12	196.28	232.18	227.08	259	243.01	225.61	214.58	258.88	207.84	198.03
cis_mRNA_overlap	0	mRNA-CompleteIn-LncExon	LTCONS_00004247	NM_001348614.1	NC_003279.8	7322276	7323590	626	-	NC_003279.8	7322330	7323590	567	-	-224.08	0.6676	0.6972	0.48	1.77	0.54	1.71	0.57	0.09	0.33	0.82	2.16	0.4	2.37	2.25	0.06	1.12	0.25	1.5	0	0.05	0	0.23	0.47	0	0.93	0.21
cis_mRNA_up10k	8270	NA	LTCONS_00004247	NM_001128979.2	NC_003279.8	7322276	7323590	626	-	NC_003279.8	7313675	7314007	276	-	*	0.9408	0.8182	0.48	1.77	0.54	1.71	0.57	0.09	0.33	0.82	2.16	0.4	2.37	2.25	1.21	5.57	0.56	6.52	1.42	0.76	2.45	4.53	7.02	1.34	6.39	7.46
cis_mRNA_up10k	8753	NA	LTCONS_00004247	NM_059668.3	NC_003279.8	7322276	7323590	626	-	NC_003279.8	7312911	7313524	441	-	*	-0.8668	-0.8741	0.48	1.77	0.54	1.71	0.57	0.09	0.33	0.82	2.16	0.4	2.37	2.25	34.49	14.25	33.95	16.18	24.69	43.26	34.37	14.57	14.66	36.99	11.82	16.93
cis_mRNA_dw20k	13165	NA	LTCONS_00004263	NM_059686.3	NC_003279.8	7401880	7402703	824	-	NC_003279.8	7388110	7388716	522	+	*	0.7724	0.7258	0.27	0.32	0.13	0.43	0	0.03	0	0.63	0.47	0.07	0.28	0.86	0.06	1.24	0.24	1.05	0.24	0	0.3	1.49	0.88	0.06	0.93	1.03
cis_mRNA_dw20k	639	NA	LTCONS_00004263	NM_059690.1	NC_003279.8	7401880	7402703	824	-	NC_003279.8	7403341	7404352	951	-	-1804.5	0.825	0.8897	0.27	0.32	0.13	0.43	0	0.03	0	0.63	0.47	0.07	0.28	0.86	11.87	705.31	2	774.76	0.5	1.06	1.15	968.42	759.11	0.4	728.9	747.05
cis_mRNA_overlap	0	Lnc-AntiOverlap-mRNA	LTCONS_00004263	NM_059689.5	NC_003279.8	7401880	7402703	824	-	NC_003279.8	7401697	7402708	951	+	-1811.3	0.876	0.8722	0.27	0.32	0.13	0.43	0	0.03	0	0.63	0.47	0.07	0.28	0.86	13.95	561.87	0.36	841.83	0.5	1.36	0.48	888.21	831.92	0.13	593.79	856.47
tran	NA	NA	LTCONS_00004263	MTCONS_00030736	NC_003279.8	7401880	7402703	824	-	NC_003283.11	13316202	13317997	941	-	-860.85	0.6642	0.8266	0.27	0.32	0.13	0.43	0	0.03	0	0.63	0.47	0.07	0.28	0.86	22.87	91.59	3.27	156.13	0.24	0.27	0.93	35.76	138.79	0	100.12	102.95
tran	NA	NA	LTCONS_00004263	NM_063909.7	NC_003279.8	7401880	7402703	824	-	NC_003280.10	10707222	10708222	954	+	-1219.56	0.7669	0.9212	0.27	0.32	0.13	0.43	0	0.03	0	0.63	0.47	0.07	0.28	0.86	262.68	975.2	74.46	1248.17	3.41	81.56	47.51	3041.78	1210.89	88.43	1021.37	1145.1
tran	NA	NA	LTCONS_00004263	NM_073899.6	NC_003279.8	7401880	7402703	824	-	NC_003283.11	13317075	13317997	876	-	-852.69	0.6665	0.7811	0.27	0.32	0.13	0.43	0	0.03	0	0.63	0.47	0.07	0.28	0.86	51.65	2370.12	51.08	2489.4	1.68	14.17	14.85	878.93	2480.24	4.49	2379.6	2129.6
tran	NA	NA	LTCONS_00004263	NM_073933.3	NC_003279.8	7401880	7402703	824	-	NC_003283.11	13441967	13443371	876	+	-845.19	0.6286	0.7881	0.27	0.32	0.13	0.43	0	0.03	0	0.63	0.47	0.07	0.28	0.86	41.35	1339.37	35.26	1411.81	1.95	9.47	9.72	364.2	1346.71	2.63	1295.11	1118.51
cis_mRNA_dw20k	16326	NA	LTCONS_00004271	NM_059702.5	NC_003279.8	7475731	7476463	733	-	NC_003279.8	7492788	7494209	786	-	*	0.7017	0.7063	1.82	0.91	2.06	0.89	1.49	0.69	2.46	0.14	1.04	0.86	1.6	1.4	5.32	1.5	4.71	1.35	4.32	3.95	5.48	1.22	1.94	3.78	1.99	2.4
cis_mRNA_up10k	1539	NA	LTCONS_00004271	NM_059697.4	NC_003279.8	7475731	7476463	733	-	NC_003279.8	7473054	7474193	858	-	*	0.7164	0.7902	1.82	0.91	2.06	0.89	1.49	0.69	2.46	0.14	1.04	0.86	1.6	1.4	26.88	14.63	26.99	13.87	48.84	10.77	43.23	8.19	14.33	10.57	13.56	13.01
cis_mRNA_dw20k	340	NA	LTCONS_00004277	NM_001025840.4	NC_003279.8	7512873	7513808	457	-	NC_003279.8	7514147	7515069	654	-	*	0.6771	0.676	0.15	0.84	0.58	0.69	0	0	0.07	0.24	0.85	0.3	1.7	0.74	4.76	13.55	3.18	16.61	1.89	5.84	4.4	9.51	15.4	3.98	14.3	20.73
cis_mRNA_dw20k	6228	NA	LTCONS_00004277	NM_059705.1	NC_003279.8	7512873	7513808	457	-	NC_003279.8	7505972	7506646	411	+	*	0.7939	0.7807	0.15	0.84	0.58	0.69	0	0	0.07	0.24	0.85	0.3	1.7	0.74	0.44	6.31	0.34	5.37	0.17	0	0.08	4.59	4.41	0	6.91	5.75
cis_mRNA_dw20k	9641	NA	LTCONS_00004277	NM_001025838.2	NC_003279.8	7512873	7513808	457	-	NC_003279.8	7501380	7503233	1542	+	*	-0.7008	-0.7706	0.15	0.84	0.58	0.69	0	0	0.07	0.24	0.85	0.3	1.7	0.74	24.34	12.28	11.17	7.42	17.29	23.24	21.63	13.04	9.19	11.14	9.4	8.89
cis_mRNA_dw20k	12781	NA	LTCONS_00004280	NM_001025837.3	NC_003279.8	7516013	7518789	2777	-	NC_003279.8	7495442	7503233	5652	+	*	0.6083	0.7951	0.38	0.17	0.5	0.27	1.1	0.19	0.68	0.13	0.26	0.3	0.17	0.25	113.54	36.77	118.56	36.69	106.84	96.37	98.25	34.64	39.74	100.64	36.98	39.42
cis_mRNA_dw20k	18705	NA	LTCONS_00004280	NM_059710.5	NC_003279.8	7516013	7518789	2777	-	NC_003279.8	7537493	7542011	2166	-	*	0.8835	0.676	0.38	0.17	0.5	0.27	1.1	0.19	0.68	0.13	0.26	0.3	0.17	0.25	32.73	17.61	23.71	13.76	41.5	10.93	33.58	11.79	13.14	13.36	17.24	15.3
cis_mRNA_dw20k	18705	NA	LTCONS_00004280	NM_182031.4	NC_003279.8	7516013	7518789	2777	-	NC_003279.8	7537493	7542011	2175	-	*	0.6911	0.718	0.38	0.17	0.5	0.27	1.1	0.19	0.68	0.13	0.26	0.3	0.17	0.25	54.83	20.66	59.21	18.1	57.55	47.04	57.37	24.36	21.74	46.44	21.29	25.68
cis_mRNA_up10k	3422	NA	LTCONS_00004280	NM_059707.5	NC_003279.8	7516013	7518789	2777	-	NC_003279.8	7522210	7525855	1065	+	*	0.8488	0.7356	0.38	0.17	0.5	0.27	1.1	0.19	0.68	0.13	0.26	0.3	0.17	0.25	107.25	77.07	119.74	70.63	128.79	83.63	101.38	74.18	77.1	90.26	74.04	72.02
cis_mRNA_up10k	2939	NA	LTCONS_00004283	NM_059710.5	NC_003279.8	7544949	7545890	942	-	NC_003279.8	7537493	7542011	2166	-	*	0.6446	0.7273	1.48	1.39	0.66	0.89	1.63	0.63	1	0.81	0.58	0.61	1.21	1.25	32.73	17.61	23.71	13.76	41.5	10.93	33.58	11.79	13.14	13.36	17.24	15.3
cis_mRNA_up10k	4983	NA	LTCONS_00004284	NM_059710.5	NC_003279.8	7546993	7551371	4379	-	NC_003279.8	7537493	7542011	2166	-	*	0.8857	0.9021	0.9	0.56	0.53	0.33	0.74	0.38	0.78	0.26	0.42	0.45	0.47	0.51	32.73	17.61	23.71	13.76	41.5	10.93	33.58	11.79	13.14	13.36	17.24	15.3
cis_mRNA_up10k	8474	NA	LTCONS_00004284	NM_059713.7	NC_003279.8	7546993	7551371	4379	-	NC_003279.8	7559844	7562164	1542	+	*	0.6499	0.6993	0.9	0.56	0.53	0.33	0.74	0.38	0.78	0.26	0.42	0.45	0.47	0.51	99.43	62.19	115.48	61.69	138.07	97.38	122.35	62.02	63.9	94.46	67.67	67.85
cis_mRNA_dw20k	11486	NA	LTCONS_00004287	MTCONS_00001486	NC_003279.8	7570941	7572012	1072	-	NC_003279.8	7553859	7559456	4960	+	*	0.6552	0.7413	1.7	0.2	2.52	0.77	3.59	0.86	3.21	0.61	0.59	2.93	0.16	0.56	81.66	29.25	103.84	38.41	77.69	121.49	79.91	37.97	38.42	109.3	32.51	38.4
cis_mRNA_dw20k	13503	NA	LTCONS_00004287	NM_059720.5	NC_003279.8	7570941	7572012	1072	-	NC_003279.8	7585514	7588361	2475	-	*	0.7971	0.6783	1.7	0.2	2.52	0.77	3.59	0.86	3.21	0.61	0.59	2.93	0.16	0.56	291.88	202.82	338.45	177.53	310.02	326.61	305.98	199.93	184.91	327.27	187.64	185.74
cis_mRNA_dw20k	3223	NA	LTCONS_00004287	MTCONS_00001489	NC_003279.8	7570941	7572012	1072	-	NC_003279.8	7559844	7567719	6467	+	*	0.8091	0.7902	1.7	0.2	2.52	0.77	3.59	0.86	3.21	0.61	0.59	2.93	0.16	0.56	28.51	16.64	35.01	18.83	31.78	29.98	31.28	15.18	17.26	26.3	18.24	20.44
cis_mRNA_dw20k	8778	NA	LTCONS_00004287	NM_059713.7	NC_003279.8	7570941	7572012	1072	-	NC_003279.8	7559844	7562164	1542	+	*	0.9075	0.7483	1.7	0.2	2.52	0.77	3.59	0.86	3.21	0.61	0.59	2.93	0.16	0.56	99.43	62.19	115.48	61.69	138.07	97.38	122.35	62.02	63.9	94.46	67.67	67.85
cis_mRNA_dw20k	9054	NA	LTCONS_00004287	NM_059718.4	NC_003279.8	7570941	7572012	1072	-	NC_003279.8	7581065	7581623	372	-	*	-0.7623	-0.6364	1.7	0.2	2.52	0.77	3.59	0.86	3.21	0.61	0.59	2.93	0.16	0.56	79.86	186.82	80.04	185.99	82.84	74.19	80.47	184.62	166.57	106.46	176.1	146.1
cis_mRNA_up10k	2268	NA	LTCONS_00004287	NM_001025905.3	NC_003279.8	7570941	7572012	1072	-	NC_003279.8	7574279	7578338	1761	+	*	0.7403	0.7343	1.7	0.2	2.52	0.77	3.59	0.86	3.21	0.61	0.59	2.93	0.16	0.56	96.59	39.54	91.8	45.88	82.74	107.56	96.01	34.56	44.91	112.09	39.69	44.72
cis_mRNA_up10k	623	NA	LTCONS_00004287	NM_059715.5	NC_003279.8	7570941	7572012	1072	-	NC_003279.8	7568093	7570319	1623	-	*	0.7887	0.6713	1.7	0.2	2.52	0.77	3.59	0.86	3.21	0.61	0.59	2.93	0.16	0.56	72.82	33.16	85.4	36.36	69.5	73.35	70.72	30.33	36.21	71.95	35.65	39.4
cis_mRNA_dw20k	11162	NA	LTCONS_00004288	NM_059713.7	NC_003279.8	7573325	7574135	811	-	NC_003279.8	7559844	7562164	1542	+	*	0.7937	0.6772	0.17	0	0.14	0.15	0.83	0.14	0.51	0	0.06	0.04	0.13	0.07	99.43	62.19	115.48	61.69	138.07	97.38	122.35	62.02	63.9	94.46	67.67	67.85
cis_mRNA_up10k	7987	NA	LTCONS_00004288	NM_059719.3	NC_003279.8	7573325	7574135	811	-	NC_003279.8	7582121	7583026	489	+	*	-0.6157	-0.6456	0.17	0	0.14	0.15	0.83	0.14	0.51	0	0.06	0.04	0.13	0.07	31.93	38.87	28.22	30.45	26.33	43.86	28.76	37.21	31.02	40.28	37.77	34.84
cis_mRNA_dw20k	12635	NA	LTCONS_00004306	NM_059735.3	NC_003279.8	7659824	7662150	2327	-	NC_003279.8	7674784	7676120	894	-	*	-0.7542	-0.7895	1.36	2.63	1.17	1.8	0.97	1.25	1.36	1.17	1.84	1.02	3.17	2.87	39.87	22.75	47.29	20.15	41.35	45.73	38.44	25.38	21.95	46.08	20.69	22.17
cis_mRNA_up10k	5580	NA	LTCONS_00004306	NM_059733.2	NC_003279.8	7659824	7662150	2327	-	NC_003279.8	7667729	7669797	996	+	*	0.6667	0.6995	1.36	2.63	1.17	1.8	0.97	1.25	1.36	1.17	1.84	1.02	3.17	2.87	0.49	23.8	0.32	7.77	0.08	0.08	0.27	19.07	8.46	0.17	20.16	7.31
cis_mRNA_dw20k	2821	NA	LTCONS_00004318	NM_059745.5	NC_003279.8	7707274	7712452	5179	-	NC_003279.8	7702434	7704454	999	+	*	-0.6797	-0.6375	1.26	0.4	0.69	0.3	0.8	0.37	0.93	0.38	0.3	0.24	0.23	0.39	203.61	378.35	210.03	344.48	149.74	220.37	176.5	301.14	353.94	224.12	376.08	347.65
cis_mRNA_dw20k	8238	NA	LTCONS_00004318	NM_001026466.2	NC_003279.8	7707274	7712452	5179	-	NC_003279.8	7698301	7699037	606	+	*	-0.6477	-0.6467	1.26	0.4	0.69	0.3	0.8	0.37	0.93	0.38	0.3	0.24	0.23	0.39	0.1	0.49	0.15	0.69	0	0.15	0.1	0.6	0.64	0.15	0.67	0.8
cis_mRNA_up10k	219	NA	LTCONS_00004318	MTCONS_00004317	NC_003279.8	7707274	7712452	5179	-	NC_003279.8	7705212	7707056	1113	-	*	0.7009	0.7145	1.26	0.4	0.69	0.3	0.8	0.37	0.93	0.38	0.3	0.24	0.23	0.39	79.21	28.52	74.45	25.24	69.76	73.07	75.53	28	30.06	65.02	26.34	32.19
cis_mRNA_dw20k	13569	NA	LTCONS_00004319	NM_001026466.2	NC_003279.8	7712605	7715230	2626	-	NC_003279.8	7698301	7699037	606	+	*	-0.6735	-0.7009	0.49	0.13	0.29	0.08	0.61	0.13	0.44	0.19	0.16	0.04	0.08	0.1	0.1	0.49	0.15	0.69	0	0.15	0.1	0.6	0.64	0.15	0.67	0.8
cis_mRNA_dw20k	8152	NA	LTCONS_00004319	NM_059745.5	NC_003279.8	7712605	7715230	2626	-	NC_003279.8	7702434	7704454	999	+	*	-0.7361	-0.6807	0.49	0.13	0.29	0.08	0.61	0.13	0.44	0.19	0.16	0.04	0.08	0.1	203.61	378.35	210.03	344.48	149.74	220.37	176.5	301.14	353.94	224.12	376.08	347.65
cis_mRNA_up10k	5550	NA	LTCONS_00004319	MTCONS_00004317	NC_003279.8	7712605	7715230	2626	-	NC_003279.8	7705212	7707056	1113	-	*	0.637	0.6316	0.49	0.13	0.29	0.08	0.61	0.13	0.44	0.19	0.16	0.04	0.08	0.1	79.21	28.52	74.45	25.24	69.76	73.07	75.53	28	30.06	65.02	26.34	32.19
cis_mRNA_up10k	9800	NA	LTCONS_00004319	MTCONS_00001531	NC_003279.8	7712605	7715230	2626	-	NC_003279.8	7725029	7728811	2616	+	*	-0.689	-0.6316	0.49	0.13	0.29	0.08	0.61	0.13	0.44	0.19	0.16	0.04	0.08	0.1	66.18	73.67	69.81	76.3	61.89	65.43	58.86	70.63	73.75	66.31	76.14	81.07
cis_mRNA_up10k	8894	NA	LTCONS_00004321	MTCONS_00001540	NC_003279.8	7746237	7746604	368	-	NC_003279.8	7755497	7756568	1021	+	*	0.7941	0.7527	0	0	0.6	0	0.69	0	0.2	0	0	0	0	0	6.15	3.34	7.83	4.23	21.96	2.2	15.07	0.88	3.23	2.9	3.94	4.06
cis_mRNA_dw20k	304	NA	LTCONS_00004322	MTCONS_00001540	NC_003279.8	7756871	7764602	7732	-	NC_003279.8	7755497	7756568	1021	+	*	0.9798	0.7032	0.21	0.02	0.41	0.03	1.2	0.05	0.98	0.02	0.03	0.07	0.02	0.05	6.15	3.34	7.83	4.23	21.96	2.2	15.07	0.88	3.23	2.9	3.94	4.06
cis_mRNA_up10k	8837	NA	LTCONS_00004322	MTCONS_00001548	NC_003279.8	7756871	7764602	7732	-	NC_003279.8	7773438	7777643	3054	+	*	0.897	0.8728	0.21	0.02	0.41	0.03	1.2	0.05	0.98	0.02	0.03	0.07	0.02	0.05	32.07	13.25	27.29	17.45	44.64	15.41	35.69	5.53	13.83	17.88	16.4	14.52
cis_mRNA_up10k	8837	NA	LTCONS_00004322	NM_059752.5	NC_003279.8	7756871	7764602	7732	-	NC_003279.8	7773438	7777469	2895	+	*	0.6631	0.834	0.21	0.02	0.41	0.03	1.2	0.05	0.98	0.02	0.03	0.07	0.02	0.05	22.41	13.63	27.71	13.91	25.67	15.64	21.85	12.72	14.18	24.03	13	12.96
cis_mRNA_dw20k	2955	NA	LTCONS_00004326	NM_059756.2	NC_003279.8	7781178	7783723	1808	-	NC_003279.8	7786677	7793539	1272	-	*	-0.8115	-0.7215	1.36	0.18	1.12	0.28	0.84	0.85	0.81	0.31	0.32	1.05	0.23	0.13	0.76	2.83	1.34	3.28	1.35	0.54	0.54	1.52	2.97	0.8	3.3	2.35
cis_mRNA_dw20k	3536	NA	LTCONS_00004326	MTCONS_00001548	NC_003279.8	7781178	7783723	1808	-	NC_003279.8	7773438	7777643	3054	+	*	0.6259	0.6084	1.36	0.18	1.12	0.28	0.84	0.85	0.81	0.31	0.32	1.05	0.23	0.13	32.07	13.25	27.29	17.45	44.64	15.41	35.69	5.53	13.83	17.88	16.4	14.52
cis_mRNA_dw20k	3536	NA	LTCONS_00004326	MTCONS_00001549	NC_003279.8	7781178	7783723	1808	-	NC_003279.8	7773438	7777643	3060	+	*	0.8205	0.7902	1.36	0.18	1.12	0.28	0.84	0.85	0.81	0.31	0.32	1.05	0.23	0.13	31.07	16.91	31.32	14.96	29.5	33.27	28.94	27	18.69	28.04	18.99	22.38
cis_mRNA_dw20k	3710	NA	LTCONS_00004326	NM_059752.5	NC_003279.8	7781178	7783723	1808	-	NC_003279.8	7773438	7777469	2895	+	*	0.8619	0.8392	1.36	0.18	1.12	0.28	0.84	0.85	0.81	0.31	0.32	1.05	0.23	0.13	22.41	13.63	27.71	13.91	25.67	15.64	21.85	12.72	14.18	24.03	13	12.96
cis_mRNA_up10k	8971	NA	LTCONS_00004326	NM_001083134.3	NC_003279.8	7781178	7783723	1808	-	NC_003279.8	7766838	7772208	2475	-	*	0.9275	0.8042	1.36	0.18	1.12	0.28	0.84	0.85	0.81	0.31	0.32	1.05	0.23	0.13	75.61	34.44	69.37	37.16	61.6	68.09	69.21	27.68	41.38	68.83	41.36	43.53
tran	NA	NA	LTCONS_00004326	MTCONS_00030824	NC_003279.8	7781178	7783723	1808	-	NC_003283.11	13646884	13660470	9864	-	-823.42	0.8261	0.7343	1.36	0.18	1.12	0.28	0.84	0.85	0.81	0.31	0.32	1.05	0.23	0.13	5.47	0.18	2.04	1.47	3.14	2.23	3.03	0	0.75	1.53	0.38	0.77
tran	NA	NA	LTCONS_00004326	MTCONS_00030825	NC_003279.8	7781178	7783723	1808	-	NC_003283.11	13646884	13660470	9751	-	-823.42	-0.7463	-0.7552	1.36	0.18	1.12	0.28	0.84	0.85	0.81	0.31	0.32	1.05	0.23	0.13	2.02	6.69	6.15	5.27	4.46	4.95	4.54	4.98	6.48	4.65	6.79	8.66
cis_mRNA_dw20k	7713	NA	LTCONS_00004343	NM_001026416.3	NC_003279.8	7879595	7880359	765	-	NC_003279.8	7866401	7871883	1965	+	*	0.7941	0.7973	0.11	0.5	0	0.23	0	0	0.07	0	0.51	0.04	0.78	0.66	449.58	590.01	310.11	643.05	302.79	427.65	374.12	523.72	615.01	437.33	639	613.38
cis_mRNA_up10k	4080	NA	LTCONS_00004343	NM_059776.6	NC_003279.8	7879595	7880359	765	-	NC_003279.8	7872265	7875516	1995	-	*	0.8647	0.7724	0.11	0.5	0	0.23	0	0	0.07	0	0.51	0.04	0.78	0.66	4.28	41.68	2.34	61.18	0.99	0.94	1.02	10.98	61.66	0.71	54.04	62.78
cis_mRNA_up10k	9199	NA	LTCONS_00004343	NM_001263694.1	NC_003279.8	7879595	7880359	765	-	NC_003279.8	7889557	7894716	2139	+	*	0.9103	0.8329	0.11	0.5	0	0.23	0	0	0.07	0	0.51	0.04	0.78	0.66	5.11	12.75	1.86	13.96	4.05	3.3	4	5.83	14.57	2.43	15	16.71
cis_mRNA_dw20k	3699	NA	LTCONS_00004344	MTCONS_00004348	NC_003279.8	7893791	7895345	1555	-	NC_003279.8	7899043	7904916	1306	-	*	0.6735	0.6308	0.48	0.35	0.17	0.28	0.47	0.21	0.62	0.29	0.38	0.12	0.39	0.68	0.28	0	0	0.35	0.38	0.1	0.22	0	0.17	0	0	0.44
cis_mRNA_dw20k	8217	NA	LTCONS_00004344	NM_059777.1	NC_003279.8	7893791	7895345	1555	-	NC_003279.8	7884352	7885575	426	+	*	0.6615	0.7133	0.48	0.35	0.17	0.28	0.47	0.21	0.62	0.29	0.38	0.12	0.39	0.68	4.6	3.64	2.72	6.7	5.73	2.04	4.78	3.43	4.18	1.98	3.68	5.76
cis_mRNA_up10k	6637	NA	LTCONS_00004345	NM_059781.6	NC_003279.8	7893791	7895364	875	-	NC_003279.8	7902000	7903188	540	+	*	-0.7101	-0.6121	0.3	0	0.26	0	0.39	0.07	0.45	0	0	0	0	0.05	2.9	58.7	1.21	49.09	0.63	0.11	0.74	55.01	48.85	0.12	55.84	41.66
cis_mRNA_dw20k	11079	NA	LTCONS_00004384	NM_001025822.2	NC_003279.8	8120020	8124957	4938	-	NC_003279.8	8103606	8108942	3936	+	*	-0.6626	-0.7832	0.53	0.87	0.38	0.64	0.49	0.22	0.48	0.37	0.68	0.27	0.9	1.66	31.03	7.93	27.28	8.95	26.19	27.78	26.42	10.01	11.01	31.29	8.89	7.19
cis_mRNA_dw20k	5025	NA	LTCONS_00004386	NM_059829.4	NC_003279.8	8132592	8134481	1890	-	NC_003279.8	8139505	8142537	1584	-	*	0.9592	0.6842	0.25	0.04	0.09	0.03	0.41	0.07	0.47	0	0.11	0.1	0.04	0.09	0.51	0.19	0.24	0.16	0.75	0.08	0.71	0.09	0.13	0.22	0.18	0.12
cis_mRNA_overlap	0	Lnc-AntiOverlap-mRNA	LTCONS_00004386	NM_059828.4	NC_003279.8	8132592	8134481	1890	-	NC_003279.8	8134144	8134735	513	+	-673.6	0.8291	0.6105	0.25	0.04	0.09	0.03	0.41	0.07	0.47	0	0.11	0.1	0.04	0.09	205.98	80.69	166.14	53.08	215.9	55.41	189.88	51.27	52.85	78.51	64.74	45.64
cis_mRNA_dw20k	14758	NA	LTCONS_00004405	MTCONS_00004409	NC_003279.8	8272637	8274141	1505	-	NC_003279.8	8288898	8293640	3350	-	*	0.7579	0.778	0.19	0	0.1	0	0.43	0	0.57	0	0	0	0	0	98.15	56.93	102.42	63.17	118.23	102.33	115.87	57.15	61.71	91.17	65.14	64.43
cis_mRNA_dw20k	1743	NA	LTCONS_00004405	MTCONS_00004408	NC_003279.8	8272637	8274141	1505	-	NC_003279.8	8275883	8293640	5396	-	*	0.6017	0.6157	0.19	0	0.1	0	0.43	0	0.57	0	0	0	0	0	26.66	15.87	26.91	16.53	23.77	27.58	29.33	14.38	16.31	24.21	16.67	18.64
cis_mRNA_overlap	0	Lnc-AntiOverlap-mRNA	LTCONS_00004405	NM_001263792.1	NC_003279.8	8272637	8274141	1505	-	NC_003279.8	8270481	8275512	1878	+	*	0.9716	0.8321	0.19	0	0.1	0	0.43	0	0.57	0	0	0	0	0	2.88	0.71	3.93	0.74	8.33	0.36	8.81	0.18	1.18	0.4	0.88	1.24
cis_mRNA_up10k	16	NA	LTCONS_00004405	NM_001263793.1	NC_003279.8	8272637	8274141	1505	-	NC_003279.8	8274156	8275512	519	+	*	0.7277	0.8252	0.19	0	0.1	0	0.43	0	0.57	0	0	0	0	0	2.02	0.39	4.39	0.88	17.11	0.4	4.88	0	0.95	0.21	0.42	0
cis_mRNA_up10k	7926	NA	LTCONS_00004405	NM_059852.5	NC_003279.8	8272637	8274141	1505	-	NC_003279.8	8282066	8284298	1812	+	*	0.991	0.8419	0.19	0	0.1	0	0.43	0	0.57	0	0	0	0	0	3.59	0.35	3.01	0.36	8.79	0.64	9.55	0.23	0.33	0.66	0.36	0.47
cis_mRNA_dw20k	13895	NA	LTCONS_00004436	NM_001025914.4	NC_003279.8	8393799	8394267	469	-	NC_003279.8	8408161	8410803	684	-	*	0.8514	0.7196	0.29	0	0.42	0.3	0.83	0.21	0.49	0	0.13	0.29	0	0.07	113.66	40.78	145.68	40.81	159.55	110.89	139.3	44.64	41.7	103.69	41.93	39.97
cis_mRNA_dw20k	13895	NA	LTCONS_00004436	NM_059880.5	NC_003279.8	8393799	8394267	469	-	NC_003279.8	8408161	8409731	591	-	*	0.8697	0.7302	0.29	0	0.42	0.3	0.83	0.21	0.49	0	0.13	0.29	0	0.07	8.83	0.8	5.95	0.5	12.18	4.53	10.15	0.57	0.63	3.37	0	1.49
cis_mRNA_dw20k	16265	NA	LTCONS_00004436	NM_059871.2	NC_003279.8	8393799	8394267	469	-	NC_003279.8	8375490	8377535	1026	+	*	0.6898	0.7613	0.29	0	0.42	0.3	0.83	0.21	0.49	0	0.13	0.29	0	0.07	0.12	0	0.16	0	0.13	0.1	0.23	0	0.02	0.03	0	0.07
cis_mRNA_up10k	1203	NA	LTCONS_00004436	NM_001129046.2	NC_003279.8	8393799	8394267	469	-	NC_003279.8	8378305	8392597	825	-	*	0.7126	0.7619	0.29	0	0.42	0.3	0.83	0.21	0.49	0	0.13	0.29	0	0.07	42.42	26.14	42.49	35.53	42.08	44.03	46.55	19.54	31.61	39.92	26.87	37.87
cis_mRNA_up10k	4740	NA	LTCONS_00004436	NM_001129047.2	NC_003279.8	8393799	8394267	469	-	NC_003279.8	8399006	8400169	429	+	*	0.8023	0.6949	0.29	0	0.42	0.3	0.83	0.21	0.49	0	0.13	0.29	0	0.07	4.01	4.54	8.43	4.78	8.53	6.08	6.98	4.21	3.66	6.57	4.47	5.02
cis_mRNA_up10k	483	NA	LTCONS_00004436	MTCONS_00001666	NC_003279.8	8393799	8394267	469	-	NC_003279.8	8394749	8403934	5206	+	*	0.6375	0.6596	0.29	0	0.42	0.3	0.83	0.21	0.49	0	0.13	0.29	0	0.07	15.46	6.8	18.02	8.69	15.35	19.7	17.86	6.53	9.05	16.09	8.16	11.23
cis_mRNA_dw20k	16438	NA	LTCONS_00004457	NM_001128964.2	NC_003279.8	8453393	8453900	508	-	NC_003279.8	8470337	8471852	840	-	*	0.7429	0.8016	0.06	0.11	0	0.27	0.06	0	0	0.11	0.46	0	0.57	0.36	0.07	2.1	0.23	1.66	0.67	0.07	0.42	1.27	1.12	0	2.71	1.15
cis_mRNA_dw20k	17717	NA	LTCONS_00004457	NM_059889.4	NC_003279.8	8453393	8453900	508	-	NC_003279.8	8434556	8435677	666	+	*	-0.6493	-0.768	0.06	0.11	0	0.27	0.06	0	0	0.11	0.46	0	0.57	0.36	131.22	114.03	161.74	102.13	127.62	125.5	130.06	104.32	107.39	149.15	112.44	104.68
cis_mRNA_dw20k	18657	NA	LTCONS_00004457	NM_001128965.1	NC_003279.8	8453393	8453900	508	-	NC_003279.8	8472556	8473481	573	-	*	0.8734	0.8926	0.06	0.11	0	0.27	0.06	0	0	0.11	0.46	0	0.57	0.36	0.22	1.57	0	1.3	0.05	0.05	0.11	0.96	1.17	0	2.71	1.72
cis_mRNA_dw20k	9424	NA	LTCONS_00004457	MTCONS_00004459	NC_003279.8	8453393	8453900	508	-	NC_003279.8	8463323	8469309	2135	-	*	0.6996	0.7909	0.06	0.11	0	0.27	0.06	0	0	0.11	0.46	0	0.57	0.36	0.12	0.72	0.01	0.15	0.2	0	0.19	0.23	0.58	0.01	0.6	0.4
cis_mRNA_dw20k	9457	NA	LTCONS_00004457	NM_059896.2	NC_003279.8	8453393	8453900	508	-	NC_003279.8	8463356	8469309	2259	-	*	0.6447	0.8616	0.06	0.11	0	0.27	0.06	0	0	0.11	0.46	0	0.57	0.36	0	0.09	0	0.32	0	0	0	0.1	0.15	0	0.1	0.2
cis_mRNA_up10k	2400	NA	LTCONS_00004457	NM_001263848.1	NC_003279.8	8453393	8453900	508	-	NC_003279.8	8445753	8450994	2454	-	*	0.8389	0.8895	0.06	0.11	0	0.27	0.06	0	0	0.11	0.46	0	0.57	0.36	3.7	37.43	1.93	48.78	1.67	1.15	1.3	7.12	44.28	1.33	40.46	37.06
cis_mRNA_up10k	4537	NA	LTCONS_00004457	NM_001263849.1	NC_003279.8	8453393	8453900	508	-	NC_003279.8	8445753	8448857	1875	-	*	0.8208	0.8788	0.06	0.11	0	0.27	0.06	0	0	0.11	0.46	0	0.57	0.36	3.33	20.94	0.66	32.17	2.05	1.58	2.07	3.31	26.74	1.39	23.24	32.34
cis_mRNA_up10k	6329	NA	LTCONS_00004457	NM_059895.4	NC_003279.8	8453393	8453900	508	-	NC_003279.8	8460228	8462795	984	+	*	0.7209	0.8609	0.06	0.11	0	0.27	0.06	0	0	0.11	0.46	0	0.57	0.36	5.08	11.19	4.1	10.6	8.05	2.52	7.31	8.02	8.7	2.04	12.01	10.39
cis_mRNA_up10k	8463	NA	LTCONS_00004457	NM_059893.1	NC_003279.8	8453393	8453900	508	-	NC_003279.8	8442726	8444931	1680	-	*	0.7369	0.768	0.06	0.11	0	0.27	0.06	0	0	0.11	0.46	0	0.57	0.36	0.41	7.67	0.28	4.82	0.11	0.18	0.36	5.23	6.1	0.13	6.07	6.15
cis_mRNA_dw20k	10250	NA	LTCONS_00004458	NM_001136288.1	NC_003279.8	8463323	8463859	329	-	NC_003279.8	8474108	8474732	510	-	*	0.9548	0.7372	0.25	12.31	0	10.1	0.12	0.12	0.12	14.51	7.94	0	12.1	12.69	0.71	31.49	0.87	27.45	0	0.12	0.25	24.8	27.35	0.13	36.37	29.05
cis_mRNA_dw20k	18720	NA	LTCONS_00004458	MTCONS_00004466	NC_003279.8	8463323	8463859	329	-	NC_003279.8	8482578	8484375	664	-	*	-0.8449	-0.8206	0.25	12.31	0	10.1	0.12	0.12	0.12	14.51	7.94	0	12.1	12.69	0.49	0.16	0.35	0.08	0.23	0.48	0.65	0	0.16	0.63	0.16	0.13
cis_mRNA_dw20k	529	NA	LTCONS_00004458	NM_059895.4	NC_003279.8	8463323	8463859	329	-	NC_003279.8	8460228	8462795	984	+	*	0.796	0.7337	0.25	12.31	0	10.1	0.12	0.12	0.12	14.51	7.94	0	12.1	12.69	5.08	11.19	4.1	10.6	8.05	2.52	7.31	8.02	8.7	2.04	12.01	10.39
cis_mRNA_dw20k	6479	NA	LTCONS_00004458	NM_001128964.2	NC_003279.8	8463323	8463859	329	-	NC_003279.8	8470337	8471852	840	-	*	0.8427	0.7951	0.25	12.31	0	10.1	0.12	0.12	0.12	14.51	7.94	0	12.1	12.69	0.07	2.1	0.23	1.66	0.67	0.07	0.42	1.27	1.12	0	2.71	1.15
cis_mRNA_dw20k	8698	NA	LTCONS_00004458	NM_001128965.1	NC_003279.8	8463323	8463859	329	-	NC_003279.8	8472556	8473481	573	-	*	0.8669	0.8673	0.25	12.31	0	10.1	0.12	0.12	0.12	14.51	7.94	0	12.1	12.69	0.22	1.57	0	1.3	0.05	0.05	0.11	0.96	1.17	0	2.71	1.72
cis_mRNA_overlap	0	Lnc-Overlap-mRNA	LTCONS_00004458	MTCONS_00004459	NC_003279.8	8463323	8463859	329	-	NC_003279.8	8463323	8469309	2135	-	-123.39	0.7025	0.7385	0.25	12.31	0	10.1	0.12	0.12	0.12	14.51	7.94	0	12.1	12.69	0.12	0.72	0.01	0.15	0.2	0	0.19	0.23	0.58	0.01	0.6	0.4
cis_mRNA_overlap	0	Lnc-Overlap-mRNA	LTCONS_00004458	NM_059896.2	NC_003279.8	8463323	8463859	329	-	NC_003279.8	8463356	8469309	2259	-	-123.92	0.7285	0.7697	0.25	12.31	0	10.1	0.12	0.12	0.12	14.51	7.94	0	12.1	12.69	0	0.09	0	0.32	0	0	0	0.1	0.15	0	0.1	0.2
cis_mRNA_dw20k	13138	NA	LTCONS_00004545	MTCONS_00004547	NC_003279.8	8785851	8788611	2761	-	NC_003279.8	8801748	8808173	4206	-	*	0.8363	0.8	0.65	0.11	0.37	0.04	0.61	0.24	0.71	0.08	0.11	0.31	0.06	0.08	55.49	23.58	63.11	23.54	56.98	53.56	55.41	20.83	22.51	52.01	22.65	26.91
cis_mRNA_dw20k	14671	NA	LTCONS_00004545	MTCONS_00001738	NC_003279.8	8785851	8788611	2761	-	NC_003279.8	8760045	8771181	9250	+	*	0.8536	0.8351	0.65	0.11	0.37	0.04	0.61	0.24	0.71	0.08	0.11	0.31	0.06	0.08	29.94	14.65	25.49	16.63	25.69	27.57	31.23	12.96	18.06	23.68	16.11	22.26
cis_mRNA_dw20k	16522	NA	LTCONS_00004545	NM_059979.5	NC_003279.8	8785851	8788611	2761	-	NC_003279.8	8805132	8807975	1977	-	*	0.8676	0.8278	0.65	0.11	0.37	0.04	0.61	0.24	0.71	0.08	0.11	0.31	0.06	0.08	19.34	10.66	15.68	10.68	22.15	11.87	16.01	11.47	11.87	10.79	10.59	10.1
cis_mRNA_up10k	4488	NA	LTCONS_00004545	NM_059976.5	NC_003279.8	8785851	8788611	2761	-	NC_003279.8	8793098	8796810	2769	+	*	0.8633	0.8246	0.65	0.11	0.37	0.04	0.61	0.24	0.71	0.08	0.11	0.31	0.06	0.08	119.57	31.92	126.33	35.41	125.55	111.51	119.76	33.82	39.92	112.09	32.18	39.66
cis_mRNA_up10k	466	NA	LTCONS_00004545	NM_059975.4	NC_003279.8	8785851	8788611	2761	-	NC_003279.8	8780265	8785386	1140	-	*	0.9759	0.8842	0.65	0.11	0.37	0.04	0.61	0.24	0.71	0.08	0.11	0.31	0.06	0.08	10.24	3	7.61	3.37	11.6	4.87	13.71	1.86	3.87	5.58	3.06	3.54
cis_mRNA_dw20k	15000	NA	LTCONS_00004618	NM_060043.4	NC_003279.8	9085423	9086176	568	-	NC_003279.8	9101175	9107539	2343	-	*	-0.681	-0.7203	1.82	1.87	1.83	1.88	1.19	1.8	1.55	2.4	1.58	1.9	2.69	2.2	17.7	6.13	23.36	3.65	31.84	10.34	24.18	4.06	4.99	11.84	4.96	4.68
cis_mRNA_dw20k	2490	NA	LTCONS_00004620	NM_060043.4	NC_003279.8	9098049	9098686	638	-	NC_003279.8	9101175	9107539	2343	-	*	0.7711	0.7741	0.24	0	0.05	0	0.37	0.05	0.6	0	0	0	0	0.04	17.7	6.13	23.36	3.65	31.84	10.34	24.18	4.06	4.99	11.84	4.96	4.68
cis_mRNA_dw20k	9753	NA	LTCONS_00004620	NM_060044.4	NC_003279.8	9098049	9098686	638	-	NC_003279.8	9108438	9110607	600	-	*	-0.6065	-0.7629	0.24	0	0.05	0	0.37	0.05	0.6	0	0	0	0	0.04	69.22	141.47	68.46	166.44	73.14	64.89	65.08	146.01	152.51	85.99	156.33	147.64
cis_mRNA_dw20k	5476	NA	LTCONS_00004721	MTCONS_00001841	NC_003279.8	9446240	9447966	1727	-	NC_003279.8	9431204	9440765	4277	+	*	0.6876	0.6095	0.48	0.34	0.57	0.26	0.46	0.14	0.52	0.18	0.31	0.15	0.19	0.34	25.77	20.94	27.97	22.02	34.66	23.61	30.11	19.21	21.73	23.48	23.25	24
cis_mRNA_dw20k	16645	NA	LTCONS_00004781	NM_060162.3	NC_003279.8	9630604	9631043	440	-	NC_003279.8	9647687	9649186	918	-	*	0.6615	0.7652	0.16	0	0	0.73	0.15	0	0.3	0.64	0.07	0	0.34	0.81	1.59	1.44	1.16	2.57	1.2	0.67	1.97	1.48	2.84	0.62	1.98	3.25
cis_mRNA_dw20k	5999	NA	LTCONS_00004781	MTCONS_00001882	NC_003279.8	9630604	9631043	440	-	NC_003279.8	9620233	9624606	3839	+	*	-0.6144	-0.6015	0.16	0	0	0.73	0.15	0	0.3	0.64	0.07	0	0.34	0.81	27.22	11.56	32.44	10.41	25.9	33.94	31.57	10.6	14.78	29.65	12.31	12.79
cis_mRNA_dw20k	8837	NA	LTCONS_00004802	NM_060182.5	NC_003279.8	9703667	9704146	480	-	NC_003279.8	9712982	9715221	1074	-	*	0.6933	0.6726	0.07	0.3	0.27	0.12	0.54	0.2	0.2	0	0.12	0.07	0.06	0.06	36.31	25.18	76.54	20.38	69.22	30.02	44.5	23.74	24.5	38.99	19.39	12.45
cis_mRNA_dw20k	11388	NA	LTCONS_00004826	NM_170913.1	NC_003279.8	9790711	9790926	216	-	NC_003279.8	9774280	9779324	2034	+	*	0.6959	0.716	0	0	1.29	0	0.74	0	0	0	0	0.25	0	0	4.74	2.82	5.51	3.11	4.89	3.86	3.97	1.52	3.09	4.04	3.41	3.19
cis_mRNA_dw20k	10212	NA	LTCONS_00004832	NM_001047198.4	NC_003279.8	9823023	9823814	665	-	NC_003279.8	9808904	9812812	1791	+	*	0.6855	0.7986	0.54	5.88	0.44	4.54	0.61	0.13	0.52	3.56	4.23	0.32	5.88	3.49	1.53	1.56	1.08	2.38	1.91	0.87	1.34	1.81	1.97	0.93	2.05	2.29
cis_mRNA_dw20k	6014	NA	LTCONS_00004832	NM_060205.1	NC_003279.8	9823023	9823814	665	-	NC_003279.8	9829827	9830262	372	-	*	0.9871	0.8471	0.54	5.88	0.44	4.54	0.61	0.13	0.52	3.56	4.23	0.32	5.88	3.49	0.21	9.25	0.2	8.31	0.19	0.38	0.2	6.43	8.27	0	9.07	6.43
cis_mRNA_up10k	7657	NA	LTCONS_00004832	NM_001026277.1	NC_003279.8	9823023	9823814	665	-	NC_003279.8	9813096	9815367	1107	-	*	0.7863	0.7368	0.54	5.88	0.44	4.54	0.61	0.13	0.52	3.56	4.23	0.32	5.88	3.49	0.46	0.66	0	0.62	0.03	0.01	0	0.35	1.07	0.18	0.92	1.15
cis_mRNA_up10k	8831	NA	LTCONS_00004832	NM_001026278.5	NC_003279.8	9823023	9823814	665	-	NC_003279.8	9813096	9814193	579	-	*	0.7834	0.6947	0.54	5.88	0.44	4.54	0.61	0.13	0.52	3.56	4.23	0.32	5.88	3.49	0.18	5.27	0.45	3.39	0.32	1.5	0.45	8.24	3.87	1.59	4.84	3.17
cis_mRNA_dw20k	14446	NA	LTCONS_00004842	NM_060215.1	NC_003279.8	9902599	9903577	979	-	NC_003279.8	9886200	9888154	1083	+	*	0.876	0.7285	1.94	0.02	0.55	0.1	0.53	0.93	1.93	0.07	0.03	0.55	0.05	0.18	2.66	0.79	1.22	1.09	2.13	1.77	3.8	0.56	1.35	1.08	1.03	1.69
cis_mRNA_dw20k	17730	NA	LTCONS_00004842	NM_060222.1	NC_003279.8	9902599	9903577	979	-	NC_003279.8	9921306	9921832	447	-	*	-0.7378	-0.7426	1.94	0.02	0.55	0.1	0.53	0.93	1.93	0.07	0.03	0.55	0.05	0.18	0.7	23.36	0.45	19.37	0.15	0.22	0.37	25.15	20.95	0.08	22.12	19.82
cis_mRNA_dw20k	820	NA	LTCONS_00004842	NM_001264316.1	NC_003279.8	9902599	9903577	979	-	NC_003279.8	9904396	9910527	1620	-	*	0.8439	0.704	1.94	0.02	0.55	0.1	0.53	0.93	1.93	0.07	0.03	0.55	0.05	0.18	22.92	1.36	11.55	0.85	15.46	11.96	13.18	0.92	1.32	11.06	0.66	0.59
cis_mRNA_up10k	1753	NA	LTCONS_00004842	MTCONS_00004840	NC_003279.8	9902599	9903577	979	-	NC_003279.8	9893698	9900847	3357	-	*	0.6643	0.7531	1.94	0.02	0.55	0.1	0.53	0.93	1.93	0.07	0.03	0.55	0.05	0.18	6.24	1.73	7.38	2.09	6.69	8.56	6.44	1.64	2.14	6.87	2.04	2.96
cis_mRNA_dw20k	5439	NA	LTCONS_00004876	MTCONS_00004877	NC_003279.8	10043784	10044476	693	-	NC_003279.8	10049914	10062192	4077	-	*	0.608	0.6935	0.21	0.11	0.08	0.26	0.25	0	0.17	0.11	0.46	0.09	0.27	0.12	1.91	2.13	1.76	1.78	2.64	0.83	2.81	1.5	2.72	1.31	2.95	2.94
cis_mRNA_dw20k	16862	NA	LTCONS_00004887	MTCONS_00001982	NC_003279.8	10102380	10105800	3421	-	NC_003279.8	10080162	10085519	3159	+	*	-0.6445	-0.6154	0.44	0.68	0.56	0.53	0.37	0.38	0.59	0.46	0.6	0.31	0.57	0.71	53.58	26.04	53.38	25.36	45.72	56.95	45.59	26.58	26.39	55.37	25.27	28.9
cis_mRNA_dw20k	12572	NA	LTCONS_00004900	NM_060284.3	NC_003279.8	10178533	10178928	396	-	NC_003279.8	10191499	10192832	1083	-	*	0.6876	0.7332	0.75	0	0.36	0	1.33	0.18	0.53	0.15	0	0.37	0	0.17	26.86	10.89	33.31	12.64	32.8	24.97	34.93	11.94	13.33	33.66	11.86	5.31
cis_mRNA_dw20k	15232	NA	LTCONS_00004900	NM_001264398.1	NC_003279.8	10178533	10178928	396	-	NC_003279.8	10194159	10196990	1362	-	*	0.8543	0.8827	0.75	0	0.36	0	1.33	0.18	0.53	0.15	0	0.37	0	0.17	21.84	8.05	17.43	9.21	23.87	17.24	22.6	6.96	8.84	15.93	8.96	10.16
cis_mRNA_dw20k	18575	NA	LTCONS_00004900	NM_001026221.4	NC_003279.8	10178533	10178928	396	-	NC_003279.8	10159006	10159959	531	+	*	-0.6304	-0.7036	0.75	0	0.36	0	1.33	0.18	0.53	0.15	0	0.37	0	0.17	0.79	10.98	0.35	7.99	0.71	0	0.35	9.66	4.69	0	10.08	7.23
cis_mRNA_up10k	5967	NA	LTCONS_00004900	NM_060276.3	NC_003279.8	10178533	10178928	396	-	NC_003279.8	10169874	10172567	1365	-	*	0.8142	0.7937	0.75	0	0.36	0	1.33	0.18	0.53	0.15	0	0.37	0	0.17	116.89	72.99	116.65	66.07	135.94	114.11	121.1	71.11	71.26	113.5	71.66	65.35
cis_mRNA_up10k	6951	NA	LTCONS_00004900	NM_001128952.2	NC_003279.8	10178533	10178928	396	-	NC_003279.8	10185878	10187472	1203	+	*	0.8129	0.8791	0.75	0	0.36	0	1.33	0.18	0.53	0.15	0	0.37	0	0.17	9.34	3.4	9.07	2.94	10.02	7.4	10	4.21	3.75	7.05	4.22	3.48
cis_mRNA_up10k	2377	NA	LTCONS_00004917	NM_060293.3	NC_003279.8	10233520	10236067	2548	-	NC_003279.8	10228220	10231144	1224	-	*	0.6516	0.704	0.82	0.68	1.01	0.79	0.99	0.59	0.94	0.67	0.68	0.39	0.78	0.88	16.73	18.52	24.39	14.69	22.06	16.52	20.42	13.09	13.3	16.14	15.6	17.08
cis_mRNA_overlap	0	Lnc-AntiCompleteIn-mRNAExon	LTCONS_00004996	NM_060357.4	NC_003279.8	10543612	10543847	236	-	NC_003279.8	10543026	10546185	1737	+	-447.7	0.7244	0.6504	0	0	0	0	0.62	0	0.43	0	0	0	0	0	23.93	10.71	23.47	11.95	31.48	18.56	25.44	8.52	12.45	19.3	11.53	12.26
cis_mRNA_up10k	5566	NA	LTCONS_00004996	NM_060356.2	NC_003279.8	10543612	10543847	236	-	NC_003279.8	10536284	10538047	732	-	*	0.878	0.6504	0	0	0	0	0.62	0	0.43	0	0	0	0	0	13.06	11.3	16.34	12.01	24.17	9.89	18.05	7.83	11.38	13.1	11.06	11
cis_mRNA_dw20k	12210	NA	LTCONS_00004998	NM_060362.1	NC_003279.8	10571998	10572398	401	-	NC_003279.8	10558367	10559789	1107	+	*	-0.6011	-0.7332	0.09	0.7	0.18	0.08	0	0	0	0.22	0.4	0	0.16	0.25	5.11	3.32	8.35	3.68	8.78	6.12	9.72	2.93	3.89	8.32	3.99	3
cis_mRNA_dw20k	14368	NA	LTCONS_00004998	MTCONS_00002080	NC_003279.8	10571998	10572398	401	-	NC_003279.8	10554052	10557631	2009	+	*	-0.6858	-0.7439	0.09	0.7	0.18	0.08	0	0	0	0.22	0.4	0	0.16	0.25	3.94	1.53	5.02	6.18	7.08	5.27	6.17	5.47	4.9	8.18	4.02	0.72
cis_mRNA_dw20k	19074	NA	LTCONS_00004998	NM_060359.3	NC_003279.8	10571998	10572398	401	-	NC_003279.8	10551979	10552925	591	+	*	-0.6728	-0.7238	0.09	0.7	0.18	0.08	0	0	0	0.22	0.4	0	0.16	0.25	133.71	57.99	164.47	76.87	143.15	160.25	143.71	65.42	71.08	163.57	65.88	65.42
cis_mRNA_dw20k	9293	NA	LTCONS_00004998	NM_001083144.1	NC_003279.8	10571998	10572398	401	-	NC_003279.8	10581690	10582608	330	-	*	0.6397	0.7047	0.09	0.7	0.18	0.08	0	0	0	0.22	0.4	0	0.16	0.25	3.28	6.95	0.95	7.28	1.28	0.58	1.16	4.73	9.73	0.72	7.72	8.15
cis_mRNA_dw20k	12204	NA	LTCONS_00005003	MTCONS_00005011	NC_003279.8	10621252	10622420	985	-	NC_003279.8	10634623	10638956	3462	-	*	-0.7062	-0.711	0.17	0.51	0.14	1.24	0.03	0.03	0.11	0.58	1.21	0.06	0.53	0.93	4.51	2.87	5.7	3.18	4.8	5.19	5.23	2.6	3.13	4.39	3.59	4.16
cis_mRNA_dw20k	12204	NA	LTCONS_00005003	NM_001264513.2	NC_003279.8	10621252	10622420	985	-	NC_003279.8	10634623	10635405	675	-	*	-0.7395	-0.8021	0.17	0.51	0.14	1.24	0.03	0.03	0.11	0.58	1.21	0.06	0.53	0.93	2.63	1.4	2.25	0.48	2	2.16	1.86	0.44	0.39	4.7	1.13	1.11
cis_mRNA_dw20k	12204	NA	LTCONS_00005003	NM_001264514.1	NC_003279.8	10621252	10622420	985	-	NC_003279.8	10634623	10636006	1098	-	*	-0.8093	-0.7895	0.17	0.51	0.14	1.24	0.03	0.03	0.11	0.58	1.21	0.06	0.53	0.93	7.93	1.11	4.04	1.18	5.98	7.98	5.84	1.74	1.36	5.74	1.72	1.74
cis_mRNA_dw20k	14380	NA	LTCONS_00005003	NM_060382.5	NC_003279.8	10621252	10622420	985	-	NC_003279.8	10636799	10638956	1572	-	*	-0.7348	-0.7531	0.17	0.51	0.14	1.24	0.03	0.03	0.11	0.58	1.21	0.06	0.53	0.93	64.67	53.54	80.15	53.37	67.75	64.55	66.93	51.09	53.75	64.11	56.31	53.78
cis_mRNA_dw20k	14905	NA	LTCONS_00005003	NM_001306532.1	NC_003279.8	10621252	10622420	985	-	NC_003279.8	10598710	10606348	2256	+	*	-0.8253	-0.7215	0.17	0.51	0.14	1.24	0.03	0.03	0.11	0.58	1.21	0.06	0.53	0.93	35.6	17.64	33.03	16.07	28.38	34.54	30.95	17.16	18.02	33.83	16.62	18.85
cis_mRNA_dw20k	16968	NA	LTCONS_00005003	NM_001264516.1	NC_003279.8	10621252	10622420	985	-	NC_003279.8	10639387	10640227	561	-	*	-0.7277	-0.7088	0.17	0.51	0.14	1.24	0.03	0.03	0.11	0.58	1.21	0.06	0.53	0.93	2.09	0.45	2.28	0.25	1.22	1.69	2.28	0.6	0.11	0.77	0.21	0.7
cis_mRNA_dw20k	16968	NA	LTCONS_00005003	NM_001264518.1	NC_003279.8	10621252	10622420	985	-	NC_003279.8	10639387	10640227	585	-	*	-0.6459	-0.6585	0.17	0.51	0.14	1.24	0.03	0.03	0.11	0.58	1.21	0.06	0.53	0.93	29.9	13.58	42.92	14.04	22.59	38.97	24.48	17.69	22.22	37.63	13.64	16.72
cis_mRNA_dw20k	16968	NA	LTCONS_00005003	NM_170919.4	NC_003279.8	10621252	10622420	985	-	NC_003279.8	10639387	10640227	582	-	*	-0.799	-0.7811	0.17	0.51	0.14	1.24	0.03	0.03	0.11	0.58	1.21	0.06	0.53	0.93	73.78	55.84	71.22	50.8	65.88	85.39	70.55	50.08	48.77	78.13	44.57	52.97
cis_mRNA_dw20k	17072	NA	LTCONS_00005003	NM_171844.4	NC_003279.8	10621252	10622420	985	-	NC_003279.8	10639491	10640227	558	-	*	-0.8187	-0.8511	0.17	0.51	0.14	1.24	0.03	0.03	0.11	0.58	1.21	0.06	0.53	0.93	9.87	3.85	7.21	2.54	13.32	9.23	12.6	1.44	2.66	8.99	3.48	2.31
cis_mRNA_dw20k	18389	NA	LTCONS_00005003	NM_060384.6	NC_003279.8	10621252	10622420	985	-	NC_003279.8	10640808	10642275	1299	-	*	-0.8456	-0.7671	0.17	0.51	0.14	1.24	0.03	0.03	0.11	0.58	1.21	0.06	0.53	0.93	164.45	142.64	163.87	134.26	150.46	162.72	155.22	137.81	138.54	159.36	143.46	141.52
cis_mRNA_dw20k	9327	NA	LTCONS_00005003	MTCONS_00005007	NC_003279.8	10621252	10622420	985	-	NC_003279.8	10631746	10634069	1697	-	*	-0.8253	-0.669	0.17	0.51	0.14	1.24	0.03	0.03	0.11	0.58	1.21	0.06	0.53	0.93	69.6	23.97	81.82	26.1	68.1	85.58	75.22	24.6	28.04	74.75	24.26	29.47
cis_mRNA_dw20k	9327	NA	LTCONS_00005003	NM_060380.3	NC_003279.8	10621252	10622420	985	-	NC_003279.8	10631746	10633147	909	-	*	-0.6279	-0.6562	0.17	0.51	0.14	1.24	0.03	0.03	0.11	0.58	1.21	0.06	0.53	0.93	4.03	0	5.22	0	7.32	0	1.31	0	0	4.52	0	0
cis_mRNA_up10k	2976	NA	LTCONS_00005003	MTCONS_00002107	NC_003279.8	10621252	10622420	985	-	NC_003279.8	10625395	10631557	3041	+	*	-0.7154	-0.7531	0.17	0.51	0.14	1.24	0.03	0.03	0.11	0.58	1.21	0.06	0.53	0.93	27.63	14.84	38.04	17.52	48.53	27.92	36.77	14.23	15.99	26.55	17.76	17.97
cis_mRNA_up10k	2976	NA	LTCONS_00005003	NM_060378.4	NC_003279.8	10621252	10622420	985	-	NC_003279.8	10625395	10628223	1635	+	*	-0.6815	-0.8441	0.17	0.51	0.14	1.24	0.03	0.03	0.11	0.58	1.21	0.06	0.53	0.93	108.49	69.58	152.06	64.73	198.03	86.48	155.5	65.13	63.19	96.63	71.8	63.34
cis_mRNA_up10k	759	NA	LTCONS_00005003	MTCONS_00002104	NC_003279.8	10621252	10622420	985	-	NC_003279.8	10623178	10625274	1611	+	*	-0.8125	-0.6842	0.17	0.51	0.14	1.24	0.03	0.03	0.11	0.58	1.21	0.06	0.53	0.93	42.89	22.34	42.79	24.46	42.48	47.27	47.16	20.46	23.67	41.42	23.67	25.5
cis_mRNA_up10k	759	NA	LTCONS_00005003	NM_060376.4	NC_003279.8	10621252	10622420	985	-	NC_003279.8	10623178	10624065	738	+	*	-0.7506	-0.7636	0.17	0.51	0.14	1.24	0.03	0.03	0.11	0.58	1.21	0.06	0.53	0.93	16.35	6.06	16.1	5.6	9.46	17.45	11.67	7.67	7.75	18.73	7.2	1.37
cis_mRNA_dw20k	5883	NA	LTCONS_00005004	MTCONS_00005007	NC_003279.8	10625396	10625864	469	-	NC_003279.8	10631746	10634069	1697	-	*	0.6653	0.6154	0.22	0.06	0.84	0.42	1.04	0.41	0.55	0.3	0.26	0.72	0.19	0.13	69.6	23.97	81.82	26.1	68.1	85.58	75.22	24.6	28.04	74.75	24.26	29.47
cis_mRNA_dw20k	5883	NA	LTCONS_00005004	NM_060380.3	NC_003279.8	10625396	10625864	469	-	NC_003279.8	10631746	10633147	909	-	*	0.8201	0.733	0.22	0.06	0.84	0.42	1.04	0.41	0.55	0.3	0.26	0.72	0.19	0.13	4.03	0	5.22	0	7.32	0	1.31	0	0	4.52	0	0
cis_mRNA_dw20k	8760	NA	LTCONS_00005004	MTCONS_00005011	NC_003279.8	10625396	10625864	469	-	NC_003279.8	10634623	10638956	3462	-	*	0.6199	0.6014	0.22	0.06	0.84	0.42	1.04	0.41	0.55	0.3	0.26	0.72	0.19	0.13	4.51	2.87	5.7	3.18	4.8	5.19	5.23	2.6	3.13	4.39	3.59	4.16
cis_mRNA_overlap	0	Lnc-AntiOverlap-mRNA	LTCONS_00005004	MTCONS_00002107	NC_003279.8	10625396	10625864	469	-	NC_003279.8	10625395	10631557	3041	+	-826.37	0.8576	0.6643	0.22	0.06	0.84	0.42	1.04	0.41	0.55	0.3	0.26	0.72	0.19	0.13	27.63	14.84	38.04	17.52	48.53	27.92	36.77	14.23	15.99	26.55	17.76	17.97
cis_mRNA_overlap	0	Lnc-AntiOverlap-mRNA	LTCONS_00005004	NM_060378.4	NC_003279.8	10625396	10625864	469	-	NC_003279.8	10625395	10628223	1635	+	-826.37	0.83	0.6364	0.22	0.06	0.84	0.42	1.04	0.41	0.55	0.3	0.26	0.72	0.19	0.13	108.49	69.58	152.06	64.73	198.03	86.48	155.5	65.13	63.19	96.63	71.8	63.34
cis_mRNA_up10k	57	NA	LTCONS_00005039	NM_001047166.1	NC_003279.8	10723592	10726862	3221	-	NC_003279.8	10726918	10727329	228	+	*	0.9811	0.9275	0.35	0	0.35	0.01	1.33	0.04	1.47	0	0.04	0.12	0.01	0.01	4.11	0.2	7.18	1.14	19.78	1.98	16.97	0	0.63	2.97	1.21	1.58
cis_mRNA_up10k	7178	NA	LTCONS_00005039	MTCONS_00002132	NC_003279.8	10723592	10726862	3221	-	NC_003279.8	10734039	10739774	2830	+	*	0.7256	0.8248	0.35	0	0.35	0.01	1.33	0.04	1.47	0	0.04	0.12	0.01	0.01	52.75	39.85	59.15	39.52	57.21	57.71	64.59	34.71	39.82	48.71	42.92	45.39
cis_mRNA_dw20k	1742	NA	LTCONS_00005050	MTCONS_00002149	NC_003279.8	10778410	10779730	1321	-	NC_003279.8	10771508	10776669	2731	+	*	0.6619	0.683	1.33	1.04	0.98	0.09	0.89	0.79	1.01	0.21	0.23	0.45	0.81	0.48	7.08	2.22	5.18	1.81	6.53	3.94	5.38	0.01	1.99	3.98	0.01	1.82
cis_mRNA_dw20k	13928	NA	LTCONS_00005087	MTCONS_00005091	NC_003279.8	11052417	11053772	1356	-	NC_003279.8	11067699	11134559	16468	-	*	-0.7338	-0.8263	0.21	0.38	0.19	0.32	0.23	0.34	0.32	0.39	0.59	0.28	0.51	0.43	7.8	2.81	8.08	2.81	8.07	4.66	9.4	1.64	2.62	5.4	2.72	2
cis_mRNA_dw20k	20	NA	LTCONS_00005087	NM_060460.4	NC_003279.8	11052417	11053772	1356	-	NC_003279.8	11039062	11052398	2460	+	*	-0.7123	-0.7426	0.21	0.38	0.19	0.32	0.23	0.34	0.32	0.39	0.59	0.28	0.51	0.43	21.14	17.52	24.22	15.92	23.59	19.09	22.52	17.15	15.74	20.17	19.37	18.17
cis_mRNA_dw20k	1298	NA	LTCONS_00005088	MTCONS_00005091	NC_003279.8	11054383	11066402	12020	-	NC_003279.8	11067699	11134559	16468	-	*	-0.7184	-0.7246	0.46	0.68	0.21	0.44	0.3	0.34	0.33	0.66	0.44	0.24	0.7	0.55	7.8	2.81	8.08	2.81	8.07	4.66	9.4	1.64	2.62	5.4	2.72	2
cis_mRNA_dw20k	1298	NA	LTCONS_00005088	NM_001313463.1	NC_003279.8	11054383	11066402	12020	-	NC_003279.8	11067699	11069996	1026	-	*	0.7773	0.7264	0.46	0.68	0.21	0.44	0.3	0.34	0.33	0.66	0.44	0.24	0.7	0.55	0	0.75	0	0	0	0	0	1.27	0	0	0.74	0
cis_mRNA_dw20k	9971	NA	LTCONS_00005088	NM_001026478.3	NC_003279.8	11054383	11066402	12020	-	NC_003279.8	11076372	11094259	3810	-	*	-0.8373	-0.8056	0.46	0.68	0.21	0.44	0.3	0.34	0.33	0.66	0.44	0.24	0.7	0.55	117.44	35.76	129.54	43.03	110.51	135.69	123.23	31.41	46.04	119.46	41.7	45.31
cis_mRNA_overlap	0	mRNA-AntiCompleteIn-LncIntron	LTCONS_00005118	NM_060494.1	NC_003279.8	11249145	11303315	265	-	NC_003279.8	11271708	11272346	195	+	*	0.6234	0.648	450.94	349.58	181.35	1515.69	680.72	296.75	595.19	729.77	768.31	491.09	647.76	874.19	1.44	29.42	0.96	37.67	0.61	0	0.32	37.1	26.23	0	30.33	33.27
cis_mRNA_up10k	5626	NA	LTCONS_00005118	NM_060484.3	NC_003279.8	11249145	11303315	265	-	NC_003279.8	11242754	11243520	687	-	*	0.6892	0.6526	450.94	349.58	181.35	1515.69	680.72	296.75	595.19	729.77	768.31	491.09	647.76	874.19	0.3	0.34	0	0.85	0	0	0	0.22	0.97	0	0.38	0.56
cis_mRNA_up10k	8673	NA	LTCONS_00005118	NM_060482.1	NC_003279.8	11249145	11303315	265	-	NC_003279.8	11239716	11240473	657	-	*	0.8343	0.7018	450.94	349.58	181.35	1515.69	680.72	296.75	595.19	729.77	768.31	491.09	647.76	874.19	0.77	0	0	4.89	0.18	0	0	0	1.96	0	0	3.77
cis_mRNA_dw20k	11468	NA	LTCONS_00005192	NM_060559.4	NC_003279.8	11627606	11628343	738	-	NC_003279.8	11611706	11616139	909	+	*	-0.7461	-0.7902	0.56	0.31	0.05	1.12	0.23	0.04	0.42	0.44	1.1	0.12	0.21	1.24	35.35	34.09	45.11	27.95	30.54	45.61	32.67	37.02	30.36	44.28	32.77	28.77
tran	519738	NA	LTCONS_00005192	MTCONS_00005303	NC_003279.8	11627606	11628343	738	-	NC_003279.8	12148080	12149811	1398	-	-316.04	0.8682	0.8252	0.56	0.31	0.05	1.12	0.23	0.04	0.42	0.44	1.1	0.12	0.21	1.24	0.88	0.66	0.73	1.65	0.89	0.51	1.25	1.12	1.42	0.56	0.91	1.32
tran	NA	NA	LTCONS_00005192	MTCONS_00008687	NC_003279.8	11627606	11628343	738	-	NC_003280.10	13852700	13855229	896	+	-286.83	0.8481	0.9441	0.56	0.31	0.05	1.12	0.23	0.04	0.42	0.44	1.1	0.12	0.21	1.24	7.36	5.36	1.97	18.71	5.12	3.5	6.32	8.99	9.9	3.31	6.25	10.72
cis_mRNA_dw20k	18417	NA	LTCONS_00005220	NM_001026686.3	NC_003279.8	11745430	11746421	992	-	NC_003279.8	11764837	11792066	9972	-	*	0.6623	0.8521	0.55	0.63	0.41	0.99	0.58	0.35	0.78	1.12	0.8	0.26	0.75	0.59	0.03	23.97	0	50.75	0.51	0	2.03	33.54	52.18	0	20.83	45.36
cis_mRNA_dw20k	18417	NA	LTCONS_00005220	NM_001026687.3	NC_003279.8	11745430	11746421	992	-	NC_003279.8	11764837	11792066	9969	-	*	0.645	0.7203	0.55	0.63	0.41	0.99	0.58	0.35	0.78	1.12	0.8	0.26	0.75	0.59	1.74	6.53	0.83	8.37	2.63	0.01	1.54	6.29	10.55	0.77	5.96	9.01
cis_mRNA_dw20k	18417	NA	LTCONS_00005220	NM_001047256.3	NC_003279.8	11745430	11746421	992	-	NC_003279.8	11764837	11792066	10275	-	*	0.7102	0.7622	0.55	0.63	0.41	0.99	0.58	0.35	0.78	1.12	0.8	0.26	0.75	0.59	30.4	72.28	16.42	72.74	28.31	14.27	22.34	64.78	73.46	13.5	75.46	63.42
cis_mRNA_overlap	0	Lnc-AntiOverlap-mRNA	LTCONS_00005220	NM_060592.2	NC_003279.8	11745430	11746421	992	-	NC_003279.8	11744172	11747414	954	+	*	0.6219	0.6224	0.55	0.63	0.41	0.99	0.58	0.35	0.78	1.12	0.8	0.26	0.75	0.59	0.68	9.47	0.32	7.33	0.51	0.4	0.36	8.2	6.91	0.3	10.39	7.9
cis_mRNA_dw20k	15926	NA	LTCONS_00005250	NM_060613.4	NC_003279.8	11868837	11875788	6952	-	NC_003279.8	11891713	11893720	1023	-	*	0.6962	0.6294	1	0.6	0.85	0.55	0.86	0.61	1.12	0.37	0.71	0.78	0.63	0.66	33.09	19.07	32.85	20.9	34.56	38.23	37.95	21.13	22.39	33.36	19.28	23.83
cis_mRNA_up10k	2019	NA	LTCONS_00005250	NM_001047239.3	NC_003279.8	11868837	11875788	6952	-	NC_003279.8	11877806	11887147	2367	+	*	0.8578	0.7902	1	0.6	0.85	0.55	0.86	0.61	1.12	0.37	0.71	0.78	0.63	0.66	22.24	8.22	17.85	10.1	25.65	16.45	22.96	4.32	9.11	15.3	9.94	9.34
cis_mRNA_up10k	739	NA	LTCONS_00005250	NM_001026601.3	NC_003279.8	11868837	11875788	6952	-	NC_003279.8	11851953	11868099	3213	-	*	0.7473	0.7483	1	0.6	0.85	0.55	0.86	0.61	1.12	0.37	0.71	0.78	0.63	0.66	31.17	12.97	34.83	13.97	30.09	26.81	30.39	13.65	14.84	32.13	13.38	13.74
cis_mRNA_dw20k	8710	NA	LTCONS_00005319	NM_060688.2	NC_003279.8	12250517	12250909	393	-	NC_003279.8	12239160	12241808	2019	+	*	0.6599	0.6441	5.69	1.85	1.35	4.65	6.34	2.3	6.38	2.6	2.72	3.24	2.6	3.12	0.04	0.01	0.02	0.08	0.04	0	0.04	0	0.02	0	0	0.02
cis_mRNA_dw20k	9004	NA	LTCONS_00005319	NM_060693.1	NC_003279.8	12250517	12250909	393	-	NC_003279.8	12259912	12262848	2022	-	*	0.6756	0.6835	5.69	1.85	1.35	4.65	6.34	2.3	6.38	2.6	2.72	3.24	2.6	3.12	0.03	0	0.01	0.04	0.04	0	0.04	0.02	0.05	0.01	0	0.01
cis_mRNA_up10k	8496	NA	LTCONS_00005346	NM_060745.2	NC_003279.8	12415441	12417088	1648	-	NC_003279.8	12405525	12406946	969	-	*	0.9525	0.841	0.25	0	0	0	0.47	0.03	0.44	0	0	0.02	0	0	0.11	0	0.08	0	0.59	0.08	0.47	0	0	0	0	0
cis_mRNA_dw20k	18037	NA	LTCONS_00005358	NM_060762.3	NC_003279.8	12479931	12481537	1607	-	NC_003279.8	12461656	12461895	240	+	*	0.6354	0.6763	1.84	0.59	1.82	0.91	1.61	1.15	1.42	0.66	0.81	0.73	0.38	0.68	111.69	0.55	57.43	0.17	57.5	114.04	111.21	0	0	105.43	0	0
cis_mRNA_up10k	1344	NA	LTCONS_00005358	NM_060765.1	NC_003279.8	12479931	12481537	1607	-	NC_003279.8	12476685	12478588	1266	-	*	0.8639	0.8182	1.84	0.59	1.82	0.91	1.61	1.15	1.42	0.66	0.81	0.73	0.38	0.68	5.17	1.4	3.4	1.5	4.35	2.86	3.83	1.62	2.1	3.14	1.79	1.82
cis_mRNA_up10k	4007	NA	LTCONS_00005358	NM_001129052.1	NC_003279.8	12479931	12481537	1607	-	NC_003279.8	12474642	12475925	480	-	*	0.7607	0.7439	1.84	0.59	1.82	0.91	1.61	1.15	1.42	0.66	0.81	0.73	0.38	0.68	0.63	0	1.15	0.06	0.07	0.27	0.6	0.17	0	0.28	0	0
cis_mRNA_up10k	5505	NA	LTCONS_00005358	NM_001047224.3	NC_003279.8	12479931	12481537	1607	-	NC_003279.8	12487041	12490795	1365	+	*	-0.6678	-0.662	1.84	0.59	1.82	0.91	1.61	1.15	1.42	0.66	0.81	0.73	0.38	0.68	26	28.89	24.41	28.33	21.54	28.33	23.07	26.59	26.99	26.54	29.2	25.37
cis_mRNA_up10k	6613	NA	LTCONS_00005358	NM_060764.3	NC_003279.8	12479931	12481537	1607	-	NC_003279.8	12470803	12473319	1386	-	*	-0.7898	-0.838	1.84	0.59	1.82	0.91	1.61	1.15	1.42	0.66	0.81	0.73	0.38	0.68	0.07	1.64	0	1.04	0.16	0	0	1.29	0.59	0.08	1.53	1.28
cis_mRNA_dw20k	10317	NA	LTCONS_00005373	NM_001128963.2	NC_003279.8	12574473	12575745	1273	-	NC_003279.8	12562969	12564157	300	+	*	-0.6643	-0.7875	0.74	0.26	0.83	0.58	1.05	0.67	1.69	0.31	0.21	0.34	0.6	0.46	0	1.37	0	0.87	0	0	0	1.07	0.71	1.84	0	1.27
cis_mRNA_dw20k	15442	NA	LTCONS_00005373	NM_060790.4	NC_003279.8	12574473	12575745	1273	-	NC_003279.8	12591186	12592348	876	-	*	0.7154	0.7902	0.74	0.26	0.83	0.58	1.05	0.67	1.69	0.31	0.21	0.34	0.6	0.46	23.49	2.95	11.71	3.72	21.63	6.54	17.32	2.34	3.57	4.68	2.99	3.26
cis_mRNA_dw20k	2364	NA	LTCONS_00005373	NM_001136296.1	NC_003279.8	12574473	12575745	1273	-	NC_003279.8	12578108	12579205	1008	-	*	0.6959	0.7676	0.74	0.26	0.83	0.58	1.05	0.67	1.69	0.31	0.21	0.34	0.6	0.46	0.7	0.14	1.75	0.12	0.65	0.32	1.21	0.12	0.07	0.28	0.12	0.03
cis_mRNA_dw20k	4153	NA	LTCONS_00005373	NM_060787.2	NC_003279.8	12574473	12575745	1273	-	NC_003279.8	12579897	12580957	840	-	*	0.9298	0.772	0.74	0.26	0.83	0.58	1.05	0.67	1.69	0.31	0.21	0.34	0.6	0.46	0.13	0	0.16	0	0.43	0	0.78	0	0	0.03	0	0
cis_mRNA_up10k	1678	NA	LTCONS_00005373	NM_001026273.5	NC_003279.8	12574473	12575745	1273	-	NC_003279.8	12566129	12572796	2766	-	*	0.7364	0.683	0.74	0.26	0.83	0.58	1.05	0.67	1.69	0.31	0.21	0.34	0.6	0.46	8.7	5.54	7.25	5.91	19.08	3.67	14.36	6.68	5.78	4.97	7.45	5.91
cis_mRNA_up10k	7815	NA	LTCONS_00005376	NM_060787.2	NC_003279.8	12588771	12589248	478	-	NC_003279.8	12579897	12580957	840	-	*	0.7756	0.6157	0	0	0.54	0	0.47	0	0.47	0.06	0	0	0.06	0	0.13	0	0.16	0	0.43	0	0.78	0	0	0.03	0	0
cis_mRNA_dw20k	12018	NA	LTCONS_00005378	NM_060788.3	NC_003279.8	12595316	12596375	1060	-	NC_003279.8	12582241	12583299	564	+	*	0.6819	0.6391	0.33	0.36	0.2	1.2	0.18	0.07	0.32	1.2	1.09	0.16	0.12	1.09	0.44	0.73	0.7	1.61	0.62	0.05	0.7	0.44	1.26	0.21	0.54	0.93
cis_mRNA_dw20k	9346	NA	LTCONS_00005378	MTCONS_00002465	NC_003279.8	12595316	12596375	1060	-	NC_003279.8	12582241	12585971	2042	+	*	0.8777	0.8561	0.33	0.36	0.2	1.2	0.18	0.07	0.32	1.2	1.09	0.16	0.12	1.09	0.36	0.28	0.26	0.49	0.29	0.1	0.16	0.42	0.5	0.12	0.24	0.47
cis_mRNA_dw20k	5405	NA	LTCONS_00005379	NM_060789.2	NC_003279.8	12596495	12597493	904	-	NC_003279.8	12587380	12591091	2667	+	*	0.6567	0.615	1.95	0.08	0.45	0	1.07	0.54	0.96	0	0.25	0.38	0.17	0.03	0.07	0	0.03	0.04	0.17	0	0.1	0	0.01	0.01	0	0
cis_mRNA_up10k	4148	NA	LTCONS_00005379	NM_060790.4	NC_003279.8	12596495	12597493	904	-	NC_003279.8	12591186	12592348	876	-	*	0.9326	0.8862	1.95	0.08	0.45	0	1.07	0.54	0.96	0	0.25	0.38	0.17	0.03	23.49	2.95	11.71	3.72	21.63	6.54	17.32	2.34	3.57	4.68	2.99	3.26
cis_mRNA_dw20k	18046	NA	LTCONS_00005387	NM_060805.2	NC_003279.8	12641574	12644893	2570	-	NC_003279.8	12662938	12663723	732	-	*	0.6637	0.8188	1.04	0.33	1.73	0.49	3.34	0.97	2.31	0.36	0.45	1.18	0.43	0.33	1.27	0	0.78	0	0.71	0.62	0.96	0	0	0.73	0	0
cis_mRNA_dw20k	18491	NA	LTCONS_00005387	NM_060792.1	NC_003279.8	12641574	12644893	2570	-	NC_003279.8	12621171	12623084	1140	+	*	0.7451	0.6485	1.04	0.33	1.73	0.49	3.34	0.97	2.31	0.36	0.45	1.18	0.43	0.33	0.72	0.21	0.48	0.23	0.61	0.21	0.66	0.16	0.23	0.19	0.15	0.2
cis_mRNA_up10k	7498	NA	LTCONS_00005387	NM_001026355.3	NC_003279.8	12641574	12644893	2570	-	NC_003279.8	12652390	12654354	1617	+	*	-0.8138	-0.8932	1.04	0.33	1.73	0.49	3.34	0.97	2.31	0.36	0.45	1.18	0.43	0.33	555.78	1320.34	497.53	1097.74	422.61	577.73	416.59	1295.73	1195.3	560.9	1114.45	1063.71
cis_mRNA_dw20k	17214	NA	LTCONS_00005400	NM_060827.6	NC_003279.8	12746889	12747725	837	-	NC_003279.8	12728255	12729676	558	+	*	-0.6111	-0.9144	0.1	0	0.07	0	0.67	0.03	0.23	0	0	0.17	0	0	52.24	81.93	49.39	68.87	48.35	59.85	48.87	88.86	74.51	51.02	72.25	71.1
cis_mRNA_dw20k	5921	NA	LTCONS_00005400	NM_060830.5	NC_003279.8	12746889	12747725	837	-	NC_003279.8	12738103	12740969	1470	+	*	0.8499	0.8995	0.1	0	0.07	0	0.67	0.03	0.23	0	0	0.17	0	0	25.54	19.51	22.4	15.73	32.27	23.11	27.07	14.35	17.47	22.68	18.51	17.43
cis_mRNA_dw20k	1057	NA	LTCONS_00005402	NM_060836.5	NC_003279.8	12783214	12786191	2629	-	NC_003279.8	12773661	12782158	2244	+	*	-0.9516	-0.812	0.13	0.96	0.09	0.78	0.09	0.02	0.18	0.6	0.77	0.02	0.96	0.88	41.88	15.14	53.33	12.45	39.77	48.42	39.08	15.22	14.26	45.28	15.27	13.61
cis_mRNA_dw20k	2020	NA	LTCONS_00005402	NM_182000.3	NC_003279.8	12783214	12786191	2629	-	NC_003279.8	12788210	12806546	4905	-	*	-0.9255	-0.7065	0.13	0.96	0.09	0.78	0.09	0.02	0.18	0.6	0.77	0.02	0.96	0.88	38.99	27.96	41.18	21.64	43.42	38.26	39.47	27.97	25.49	38.42	26.45	24.27
cis_mRNA_overlap	0	Lnc-AntiCompleteIn-mRNAExon	LTCONS_00005413	NM_060851.4	NC_003279.8	12882324	12882619	296	-	NC_003279.8	12878652	12902342	7254	+	-596.8	0.6289	0.7457	0	0	0.29	0	1.11	0	0.29	0	0	0	0	0	55.26	39.2	66.83	38.45	64.78	53.71	58.45	35.19	40.92	55.82	39.55	38.36
cis_mRNA_dw20k	536	NA	LTCONS_00005430	NM_001026496.2	NC_003279.8	13054967	13055616	650	-	NC_003279.8	13056151	13062101	1545	-	*	0.7193	0.8112	1.15	1.37	1.49	1.63	2.5	0.98	3.09	0.51	1.54	0.76	1.4	2.19	6.47	7.09	5.72	6.78	14.6	3.06	8.85	5.26	7.6	3.5	8.45	7.48
cis_mRNA_dw20k	3750	NA	LTCONS_00005436	NM_060884.3	NC_003279.8	13072759	13072963	205	-	NC_003279.8	13066967	13069010	1614	+	*	0.7573	0.6516	0	0	0	0.93	0	0	0	0	0	0	0	0.28	0.6	0.03	0.28	1.11	0.46	0.05	0.31	0.07	0.66	0.05	0.09	0.72
cis_mRNA_dw20k	8486	NA	LTCONS_00005436	NM_060888.1	NC_003279.8	13072759	13072963	205	-	NC_003279.8	13081448	13082166	573	-	*	0.742	0.7133	0	0	0	0.93	0	0	0	0	0	0	0	0.28	0	0.19	0	0.88	0	0	0.05	0	0.49	0	0	1.06
cis_mRNA_up10k	467	NA	LTCONS_00005449	NM_060899.3	NC_003279.8	13132878	13133204	327	-	NC_003279.8	13130943	13132412	915	-	*	0.8829	0.6484	0	0.32	1.09	0.1	0.35	0.24	0.24	0	0	0	0	0	0.75	0.03	17.46	0	10.93	2.27	7.46	0.03	0	2.29	0	0
cis_mRNA_up10k	6229	NA	LTCONS_00005449	NM_001306450.1	NC_003279.8	13132878	13133204	327	-	NC_003279.8	13124176	13126650	981	-	*	0.8221	0.6228	0	0.32	1.09	0.1	0.35	0.24	0.24	0	0	0	0	0	0.5	0	8.45	0	4.53	2.36	6.52	0	0	1.03	0	0
cis_mRNA_up10k	9998	NA	LTCONS_00005449	NM_001347281.1	NC_003279.8	13132878	13133204	327	-	NC_003279.8	13143201	13144588	1065	+	*	0.9298	0.6152	0	0.32	1.09	0.1	0.35	0.24	0.24	0	0	0	0	0	0.05	0	0.45	0	0.15	0.05	0.15	0	0	0	0.02	0
cis_mRNA_dw20k	15049	NA	LTCONS_00005455	MTCONS_00002578	NC_003279.8	13161648	13162716	1069	-	NC_003279.8	13144862	13146600	1396	+	*	-0.6432	-0.8252	0.68	0.27	0.35	0.11	0.58	0.22	0.64	0.09	0.05	0.29	0.16	0.14	0.28	0.4	0.09	0.98	0.15	0.33	0.16	0.41	1.07	0.27	0.9	1.65
cis_mRNA_dw20k	7962	NA	LTCONS_00005455	NM_060903.1	NC_003279.8	13161648	13162716	1069	-	NC_003279.8	13152596	13153687	999	+	*	0.6236	0.7042	0.68	0.27	0.35	0.11	0.58	0.22	0.64	0.09	0.05	0.29	0.16	0.14	0.14	0.02	0.16	0.07	0.52	0.16	0.13	0	0	0.03	0.02	0.03
cis_mRNA_up10k	149	NA	LTCONS_00005455	NM_001265156.1	NC_003279.8	13161648	13162716	1069	-	NC_003279.8	13155400	13161500	3324	-	*	0.6884	0.6713	0.68	0.27	0.35	0.11	0.58	0.22	0.64	0.09	0.05	0.29	0.16	0.14	33.53	14.47	35.66	15.03	29.87	39.48	36.54	12.2	15.77	32.07	15.89	18.2
cis_mRNA_dw20k	7413	NA	LTCONS_00005487	MTCONS_00002624	NC_003279.8	13367388	13369482	2095	-	NC_003279.8	13347020	13359976	2916	+	*	-0.6122	-0.6434	1.02	0.86	0.46	0.84	1.41	0.57	0.83	0.5	0.88	0.43	1.21	1.18	5.22	2.87	6.24	3.27	3.67	7.11	4.89	3.84	3.15	6.21	2.63	3.82
cis_mRNA_dw20k	9657	NA	LTCONS_00005488	MTCONS_00002627	NC_003279.8	13369632	13373676	4045	-	NC_003279.8	13347065	13359976	2856	+	*	0.6843	0.7005	0.95	0.94	1.09	1.02	1.3	0.41	1.4	0.48	1.1	0.54	1.21	1.23	2.24	1.18	1.66	1.18	4.37	0.96	3.55	0.88	0.4	0.41	2.35	1.76
cis_mRNA_dw20k	4039	NA	LTCONS_00005496	NM_060961.3	NC_003279.8	13419398	13419993	596	-	NC_003279.8	13424031	13425122	1032	-	*	0.8568	0.8212	0.21	0	0.1	0	0.46	0	0.15	0	0	0	0	0	9.23	0.12	10.7	0	12	2.33	7.25	0.05	0	1.64	0	0.02
cis_mRNA_dw20k	6542	NA	LTCONS_00005496	NM_060962.3	NC_003279.8	13419398	13419993	596	-	NC_003279.8	13426534	13428464	372	-	*	0.8104	0.8155	0.21	0	0.1	0	0.46	0	0.15	0	0	0	0	0	121.82	72.14	142.28	75.03	164.37	113.9	144.99	80.07	70.3	103.64	73.52	74.72
cis_mRNA_dw20k	7156	NA	LTCONS_00005496	NM_001265230.1	NC_003279.8	13419398	13419993	596	-	NC_003279.8	13411900	13412243	294	+	*	0.9037	0.7252	0.21	0	0.1	0	0.46	0	0.15	0	0	0	0	0	0.47	0	0.72	0.36	2.96	0.28	1.3	0.12	0	0.73	0.26	0.42
cis_mRNA_up10k	5914	NA	LTCONS_00005496	MTCONS_00005489	NC_003279.8	13419398	13419993	596	-	NC_003279.8	13408368	13413485	4250	-	*	0.8246	0.6284	0.21	0	0.1	0	0.46	0	0.15	0	0	0	0	0	0.15	0	0	0.05	0.26	0	0.13	0	0	0	0.14	0.07
cis_mRNA_up10k	5914	NA	LTCONS_00005496	MTCONS_00005490	NC_003279.8	13419398	13419993	596	-	NC_003279.8	13408368	13413485	4739	-	*	0.601	0.7223	0.21	0	0.1	0	0.46	0	0.15	0	0	0	0	0	0.27	0.08	0.61	0.21	0.53	0.32	0.71	0.08	0	0.26	0	0.18
cis_mRNA_up10k	5914	NA	LTCONS_00005496	MTCONS_00005491	NC_003279.8	13419398	13419993	596	-	NC_003279.8	13408368	13413485	4480	-	*	0.6801	0.7232	0.21	0	0.1	0	0.46	0	0.15	0	0	0	0	0	0.43	0.1	0.1	0	0.29	0.13	0.24	0.07	0.24	0	0	0.08
cis_mRNA_up10k	6520	NA	LTCONS_00005496	NM_060959.1	NC_003279.8	13419398	13419993	596	-	NC_003279.8	13411797	13412879	990	-	*	0.7789	0.6293	0.21	0	0.1	0	0.46	0	0.15	0	0	0	0	0	3.37	1.24	1.53	2.05	3.59	1.14	3.85	1.45	2.14	1.6	1.6	1.85
cis_mRNA_up10k	2484	NA	LTCONS_00005508	NM_001026662.3	NC_003279.8	13495781	13503221	7441	-	NC_003279.8	13491767	13493298	573	-	*	0.8068	0.6084	0.65	0.32	0.47	0.31	0.58	0.28	0.62	0.18	0.37	0.2	0.29	0.42	9.27	5.51	9.4	5.11	14.12	4.3	11.81	5.12	5.22	5.76	6.38	4.96
cis_mRNA_up10k	603	NA	LTCONS_00005516	NM_001026660.3	NC_003279.8	13563153	13563967	815	-	NC_003279.8	13564569	13566312	630	+	*	0.6309	0.7175	0.31	0.4	0.27	0.3	0.03	0.1	0.27	0.42	0.35	0	0.72	0.32	0.38	2.65	0.38	3.71	0.24	0.14	0.37	1.42	3.37	0.1	3.21	3.66
cis_mRNA_up10k	8413	NA	LTCONS_00005516	NM_060978.3	NC_003279.8	13563153	13563967	815	-	NC_003279.8	13572379	13575510	1470	+	*	-0.7189	-0.9177	0.31	0.4	0.27	0.3	0.03	0.1	0.27	0.42	0.35	0	0.72	0.32	68.78	15.36	92.69	17.06	84.71	84.56	79.92	15.93	16.2	84.91	15.24	18.43
cis_mRNA_dw20k	19149	NA	LTCONS_00005532	NM_060999.3	NC_003279.8	13672849	13673781	933	-	NC_003279.8	13692929	13702954	5733	-	*	0.6059	0.8456	0.03	0.21	0.03	0.05	0.18	0	0.09	0.2	0.11	0	0.72	0.19	0.3	1	0.45	0.84	0.69	0.15	0.39	0.83	0.82	0.18	0.92	0.72
cis_mRNA_up10k	487	NA	LTCONS_00005570	MTCONS_00002724	NC_003279.8	13953158	13966673	12222	-	NC_003279.8	13967159	13972077	2032	+	*	0.6719	0.8236	0.66	0.57	0.53	0.45	1.08	0.57	0.82	0.61	0.47	0.31	0.44	0.53	0.23	0.16	0.17	0.06	0.21	0.25	0.21	0.11	0.08	0.06	0.05	0.08
cis_mRNA_dw20k	19307	NA	LTCONS_00005571	MTCONS_00002707	NC_003279.8	13953733	13966673	12941	-	NC_003279.8	13930025	13934427	2762	+	*	0.9538	0.6349	0.47	0.06	0.16	0.03	0.36	0	0.64	0.06	0.03	0.07	0.1	0.06	1.52	0.51	0.85	0.52	1.38	0.53	1.73	0.39	0.72	0.79	0.49	0.45
cis_mRNA_up10k	2106	NA	LTCONS_00005571	NM_061033.3	NC_003279.8	13953733	13966673	12941	-	NC_003279.8	13943350	13951628	1653	-	*	0.6126	0.6138	0.47	0.06	0.16	0.03	0.36	0	0.64	0.06	0.03	0.07	0.1	0.06	29.1	21.85	31.69	19.83	30.38	28.06	29.09	22.84	21.35	26.43	21.09	22.22
tran	NA	NA	LTCONS_00005572	NM_001028330.4	NC_003279.8	13972509	13973777	1049	-	NC_003282.8	2901193	2901629	387	+	-217.52	0.8825	0.8811	11.44	10.41	6.48	5.87	11.12	6.84	8.26	3.86	7.07	6.32	8.52	5.77	39.19	37.32	33.81	21.38	41.83	29.34	35.09	13.02	22.13	30.88	34.37	22.58
cis_mRNA_dw20k	11843	NA	LTCONS_00005584	NM_061052.3	NC_003279.8	14050384	14051047	398	-	NC_003279.8	14062889	14068765	2169	-	*	-0.824	-0.7483	5.39	30.96	1.59	37.18	1.84	8.08	4.23	27.21	32.61	10.09	35.83	33.45	12.99	5.2	10.08	6.46	16.1	8.26	13.73	4.19	6.69	8.32	6.27	5.39
cis_mRNA_up10k	102	NA	LTCONS_00005584	MTCONS_00005581	NC_003279.8	14050384	14051047	398	-	NC_003279.8	14045959	14050283	2671	-	*	0.9787	0.9441	5.39	30.96	1.59	37.18	1.84	8.08	4.23	27.21	32.61	10.09	35.83	33.45	4.78	13.79	2.75	13.56	2.77	6.26	3.88	12.4	12.54	7.31	16.97	14.21
cis_mRNA_up10k	102	NA	LTCONS_00005584	NM_061047.5	NC_003279.8	14050384	14051047	398	-	NC_003279.8	14048538	14050283	1107	-	*	0.9316	0.8182	5.39	30.96	1.59	37.18	1.84	8.08	4.23	27.21	32.61	10.09	35.83	33.45	14.25	97.53	6.1	65.31	3.5	10.2	6.19	86.78	68.69	22.36	99.46	66.18
cis_mRNA_up10k	8374	NA	LTCONS_00005584	NM_061050.2	NC_003279.8	14050384	14051047	398	-	NC_003279.8	14059420	14060817	387	+	*	-0.8453	-0.7952	5.39	30.96	1.59	37.18	1.84	8.08	4.23	27.21	32.61	10.09	35.83	33.45	13.31	0.08	9.08	0.08	12.07	2.08	7.87	0	0.08	2.97	0.08	0
cis_mRNA_dw20k	15903	NA	LTCONS_00005624	MTCONS_00002777	NC_003279.8	14319134	14319404	271	-	NC_003279.8	14301399	14303232	759	+	*	0.8248	0.6516	0	0	0.17	0	1.3	0	0	0	0	0	0	0	2.07	0.43	2.92	0.21	5.36	1.47	1.47	0.25	0	2.24	0.07	0.15
cis_mRNA_overlap	0	Lnc-AntiOverlap-mRNA	LTCONS_00005633	MTCONS_00002788	NC_003279.8	14395300	14395682	383	-	NC_003279.8	14390383	14400166	2840	+	-443.37	0.7049	0.6628	0.1	0	0.66	0	0.56	0	0.19	0	0	0	0.08	0	1.24	0.56	1.19	0.26	2.78	0.78	2	0.53	0.48	0.62	0.4	0.8
cis_mRNA_overlap	0	Lnc-AntiOverlap-mRNA	LTCONS_00005633	NM_001026521.2	NC_003279.8	14395300	14395682	383	-	NC_003279.8	14390383	14399631	2523	+	-443.37	-0.6892	-0.6608	0.1	0	0.66	0	0.56	0	0.19	0	0	0	0.08	0	0.73	2.01	0	2.24	0	0.41	0	2.53	2.24	1.16	2.46	2.03
cis_mRNA_overlap	0	Lnc-AntiOverlap-mRNA	LTCONS_00005634	MTCONS_00002788	NC_003279.8	14397631	14398133	503	-	NC_003279.8	14390383	14400166	2840	+	-745.77	0.8849	0.7502	0.46	0.11	0.06	0	1.33	0	0.31	0	0	0.07	0	0	1.24	0.56	1.19	0.26	2.78	0.78	2	0.53	0.48	0.62	0.4	0.8
cis_mRNA_overlap	0	Lnc-AntiOverlap-mRNA	LTCONS_00005635	MTCONS_00002788	NC_003279.8	14398301	14398690	390	-	NC_003279.8	14390383	14400166	2840	+	-794.12	0.9463	0.8751	0.19	0	0.18	0	0.99	0.09	0.36	0	0	0.09	0	0	1.24	0.56	1.19	0.26	2.78	0.78	2	0.53	0.48	0.62	0.4	0.8
cis_mRNA_overlap	0	Lnc-AntiOverlap-mRNA	LTCONS_00005635	NM_001026520.2	NC_003279.8	14398301	14398690	390	-	NC_003279.8	14390383	14400166	2721	+	-794.12	-0.6288	-0.8751	0.19	0	0.18	0	0.99	0.09	0.36	0	0	0.09	0	0	2.32	9.08	2.34	8.84	0.83	1.89	1.74	5.8	7.41	2.25	10.7	7.68
cis_mRNA_overlap	0	Lnc-AntiOverlap-mRNA	LTCONS_00005635	NM_001026521.2	NC_003279.8	14398301	14398690	390	-	NC_003279.8	14390383	14399631	2523	+	-794.12	-0.6828	-0.8942	0.19	0	0.18	0	0.99	0.09	0.36	0	0	0.09	0	0	0.73	2.01	0	2.24	0	0.41	0	2.53	2.24	1.16	2.46	2.03
cis_mRNA_up10k	1141	NA	LTCONS_00005656	NM_170954.2	NC_003279.8	14519855	14521046	1192	-	NC_003279.8	14512663	14518715	873	-	*	0.6806	0.6224	0.84	0.53	1.43	0.51	0.71	0.83	1.22	0.21	0.48	0.42	0.69	0.68	57.49	33.61	58.61	29.38	60.86	52.72	59.52	31.6	29.81	47.88	28.33	31.32
cis_mRNA_dw20k	15283	NA	LTCONS_00005702	NM_001265479.1	NC_003279.8	14730034	14732457	2380	-	NC_003279.8	14711185	14714752	1869	+	*	0.9156	0.8322	1.56	0.5	1.37	0.18	2.18	1.16	2.26	0.49	0.53	1.13	0.57	0.51	25.17	9.81	23.59	9.19	25.89	23.3	25.55	9.67	9.64	21.82	9.13	9.47
cis_mRNA_dw20k	16082	NA	LTCONS_00005702	NM_061167.2	NC_003279.8	14730034	14732457	2380	-	NC_003279.8	14748538	14753138	1563	-	*	0.9029	0.8578	1.56	0.5	1.37	0.18	2.18	1.16	2.26	0.49	0.53	1.13	0.57	0.51	0.44	0	0.16	0	0.35	0.11	0.43	0.01	0	0.03	0	0.02
cis_mRNA_overlap	0	Lnc-Overlap-mRNA	LTCONS_00005702	NM_061161.1	NC_003279.8	14730034	14732457	2380	-	NC_003279.8	14726878	14730719	2175	-	*	0.922	0.9387	1.56	0.5	1.37	0.18	2.18	1.16	2.26	0.49	0.53	1.13	0.57	0.51	2.62	0.12	2.14	0.2	3.02	0.43	2.62	0.11	0.3	0.69	0.22	0.28
cis_mRNA_up10k	2780	NA	LTCONS_00005702	NM_061163.1	NC_003279.8	14730034	14732457	2380	-	NC_003279.8	14735236	14736945	1299	+	*	0.9147	0.8897	1.56	0.5	1.37	0.18	2.18	1.16	2.26	0.49	0.53	1.13	0.57	0.51	3.5	2.97	3.92	2.08	4.93	3.83	4.12	2.49	2.7	3.92	2.9	2.72
cis_mRNA_up10k	5247	NA	LTCONS_00005702	NM_061164.3	NC_003279.8	14730034	14732457	2380	-	NC_003279.8	14737703	14738622	870	+	*	0.7539	0.6224	1.56	0.5	1.37	0.18	2.18	1.16	2.26	0.49	0.53	1.13	0.57	0.51	98.96	48.48	106.8	52.5	97.09	116.37	93.56	52.98	54.93	108.13	49.23	50.5
cis_mRNA_up10k	5304	NA	LTCONS_00005702	NM_061159.4	NC_003279.8	14730034	14732457	2380	-	NC_003279.8	14721921	14724731	1311	-	*	0.8162	0.7483	1.56	0.5	1.37	0.18	2.18	1.16	2.26	0.49	0.53	1.13	0.57	0.51	2.4	1.01	2.34	1.65	5.81	1.04	3.77	0.82	1.36	1.4	1.78	1.38
cis_mRNA_up10k	6426	NA	LTCONS_00005702	NM_001265496.1	NC_003279.8	14730034	14732457	2380	-	NC_003279.8	14738882	14742522	2115	+	*	0.8	0.6364	1.56	0.5	1.37	0.18	2.18	1.16	2.26	0.49	0.53	1.13	0.57	0.51	96.28	37.65	97.1	43.76	86.69	102.6	95.52	39.18	46.97	100.86	38.84	42.83
cis_mRNA_up10k	8696	NA	LTCONS_00005702	NM_061158.5	NC_003279.8	14730034	14732457	2380	-	NC_003279.8	14720721	14721339	570	-	*	-0.6874	-0.6783	1.56	0.5	1.37	0.18	2.18	1.16	2.26	0.49	0.53	1.13	0.57	0.51	98.74	149.5	104	131.41	110.22	86.97	95.72	127.87	130.85	90.93	141.88	118.48
cis_mRNA_up10k	9573	NA	LTCONS_00005702	NM_061157.4	NC_003279.8	14730034	14732457	2380	-	NC_003279.8	14719356	14720462	855	-	*	-0.7784	-0.7483	1.56	0.5	1.37	0.18	2.18	1.16	2.26	0.49	0.53	1.13	0.57	0.51	218.15	268.93	215.56	235.9	197.55	220.94	200.46	247.43	231.95	214.99	245.98	215.42
cis_mRNA_dw20k	8406	NA	LTCONS_00005727	MTCONS_00002895	NC_003279.8	14959972	14960729	758	-	NC_003279.8	14946155	14951567	1752	+	*	0.7234	0.6918	0.3	0.13	0.07	0.03	0.49	0	0.18	0.07	0.07	0	0.07	0.04	4.45	5.36	4.02	4.37	9.1	1.08	5.77	4.51	6.26	3.81	5.41	5.11
cis_mRNA_up10k	6585	NA	LTCONS_00005727	NM_001026711.2	NC_003279.8	14959972	14960729	758	-	NC_003279.8	14967313	14968470	375	+	*	0.7749	0.7096	0.3	0.13	0.07	0.03	0.49	0	0.18	0.07	0.07	0	0.07	0.04	26.48	21.46	28.7	26.04	43.21	15.48	40.09	24.13	22.91	19.85	24.44	21.57
cis_mRNA_up10k	9406	NA	LTCONS_00005745	NM_001026264.5	NC_003279.8	15068169	15072268	1007	-	NC_003279.8	15053794	15058764	1665	-	*	0.7146	0.6889	0.28	0	0.39	0.34	4.01	0.04	1.33	0	0	0	0.06	0	3.12	2	2.33	2.64	3.79	1.56	3.78	1.74	2.37	1.78	2.83	2.53
cis_mRNA_dw20k	19860	NA	LTCONS_00005759	MTCONS_00008960	NC_003280.10	50435	51671	1237	+	NC_003280.10	71530	79496	2930	-	*	0.8747	0.8975	1.08	0.85	1.14	1.01	0.83	0.75	1.08	0.88	0.99	0.69	1.35	1.21	0.55	0.13	0.4	0.34	0	0.28	0.61	0	0.34	0	0.76	0.85
cis_mRNA_dw20k	18976	NA	LTCONS_00005767	NM_001306572.1	NC_003280.10	66346	69306	2961	+	NC_003280.10	45045	47371	1299	+	*	0.6469	0.7018	0.35	0.09	0.35	0.12	0.68	0.24	0.7	0.08	0.08	0.17	0.2	0.3	59.59	41.56	69.85	41.37	61.86	60.31	60.01	41.83	42.86	60.67	46.99	45.83
cis_mRNA_dw20k	2205	NA	LTCONS_00005767	NM_061250.5	NC_003280.10	66346	69306	2961	+	NC_003280.10	61315	64142	1050	+	*	-0.7006	-0.7053	0.35	0.09	0.35	0.12	0.68	0.24	0.7	0.08	0.08	0.17	0.2	0.3	7.34	9.66	4.79	13.7	4.83	6.33	4.48	14.65	11.72	9.82	11.7	15.54
cis_mRNA_dw20k	2205	NA	LTCONS_00005767	NM_182217.4	NC_003280.10	66346	69306	2961	+	NC_003280.10	62972	64142	891	+	*	-0.685	-0.7509	0.35	0.09	0.35	0.12	0.68	0.24	0.7	0.08	0.08	0.17	0.2	0.3	7.82	20.49	4.51	18.13	4.5	8.07	6.43	28.26	23.93	6.39	19.07	21.98
cis_mRNA_dw20k	6358	NA	LTCONS_00005767	NM_001129119.2	NC_003280.10	66346	69306	2961	+	NC_003280.10	57672	59989	1182	+	*	0.752	0.8456	0.35	0.09	0.35	0.12	0.68	0.24	0.7	0.08	0.08	0.17	0.2	0.3	48.9	23.14	59.73	26.53	59.1	47.06	53.61	22.8	23.52	47.7	25.35	25.05
cis_mRNA_up10k	376	NA	LTCONS_00005767	NM_001313583.1	NC_003280.10	66346	69306	2961	+	NC_003280.10	69681	70956	951	+	*	0.6369	0.7333	0.35	0.09	0.35	0.12	0.68	0.24	0.7	0.08	0.08	0.17	0.2	0.3	5.15	1.55	4.75	1.31	3.94	5.13	5.58	0.92	3.1	3.42	2.1	1.35
cis_mRNA_up10k	376	NA	LTCONS_00005767	NM_061251.3	NC_003280.10	66346	69306	2961	+	NC_003280.10	69681	70956	954	+	*	0.8247	0.8211	0.35	0.09	0.35	0.12	0.68	0.24	0.7	0.08	0.08	0.17	0.2	0.3	19.1	6.65	15.8	8.52	21.8	17.13	22.5	6.04	7.74	17.46	6.35	9.99
cis_mRNA_dw20k	16677	NA	LTCONS_00005772	NM_061250.5	NC_003280.10	80818	82207	1390	+	NC_003280.10	61315	64142	1050	+	*	-0.6804	-0.6643	0.52	0.17	0.65	0.15	0.86	0.26	1.11	0.51	0.19	0.39	0.36	0.21	7.34	9.66	4.79	13.7	4.83	6.33	4.48	14.65	11.72	9.82	11.7	15.54
cis_mRNA_dw20k	9863	NA	LTCONS_00005772	NM_001313583.1	NC_003280.10	80818	82207	1390	+	NC_003280.10	69681	70956	951	+	*	0.6003	0.6364	0.52	0.17	0.65	0.15	0.86	0.26	1.11	0.51	0.19	0.39	0.36	0.21	5.15	1.55	4.75	1.31	3.94	5.13	5.58	0.92	3.1	3.42	2.1	1.35
cis_mRNA_dw20k	9863	NA	LTCONS_00005772	NM_061251.3	NC_003280.10	80818	82207	1390	+	NC_003280.10	69681	70956	954	+	*	0.7286	0.6154	0.52	0.17	0.65	0.15	0.86	0.26	1.11	0.51	0.19	0.39	0.36	0.21	19.1	6.65	15.8	8.52	21.8	17.13	22.5	6.04	7.74	17.46	6.35	9.99
cis_mRNA_up10k	1359	NA	LTCONS_00005772	MTCONS_00008959	NC_003280.10	80818	82207	1390	+	NC_003280.10	71530	79460	2906	-	*	-0.6387	-0.6713	0.52	0.17	0.65	0.15	0.86	0.26	1.11	0.51	0.19	0.39	0.36	0.21	0.61	3.6	0.58	2.76	0.77	0.55	0.3	0.06	1.84	0.63	2.86	2.05
cis_mRNA_up10k	3524	NA	LTCONS_00005772	NM_001026809.3	NC_003280.10	80818	82207	1390	+	NC_003280.10	71939	77295	1299	-	*	-0.6559	-0.7798	0.52	0.17	0.65	0.15	0.86	0.26	1.11	0.51	0.19	0.39	0.36	0.21	0	2.03	0	1.42	0	0	0	0	1.18	0	1.46	1.02
cis_mRNA_dw20k	16917	NA	LTCONS_00005792	NM_061268.2	NC_003280.10	156915	162268	5354	+	NC_003280.10	135466	139999	3885	+	*	0.6584	0.6452	0.97	0.71	0.73	0.71	0.71	0.48	0.89	0.51	0.67	0.55	0.5	0.82	0.14	0	0.04	0.11	0.21	0.03	0.22	0.01	0.01	0.01	0.01	0.07
cis_mRNA_dw20k	11529	NA	LTCONS_00005813	NM_061272.5	NC_003280.10	181207	181916	710	+	NC_003280.10	163142	169679	1755	+	*	0.705	0.6503	0.37	0.43	0.57	0.39	0.2	0.16	0.24	0.46	0.33	0.08	0.92	0.31	8.77	16.83	6.75	14	8.74	4.56	10.12	12.19	13.26	4.92	19.46	11.81
cis_mRNA_up10k	2157	NA	LTCONS_00005813	NM_061275.6	NC_003280.10	181207	181916	710	+	NC_003280.10	177244	179051	480	-	*	0.6748	0.7552	0.37	0.43	0.57	0.39	0.2	0.16	0.24	0.46	0.33	0.08	0.92	0.31	13.22	46.14	14.71	31.93	11.38	10.7	11.4	29.59	26.5	12.93	47.05	31.57
cis_mRNA_dw20k	2554	NA	LTCONS_00005819	MTCONS_00008996	NC_003280.10	220336	220566	231	+	NC_003280.10	223119	273994	15967	-	*	0.6021	0.7527	0	0	0.9	0	0	0.21	0.23	0	0	0	0	0	18.44	8.83	22.82	8.92	19.28	21.46	20.18	8.01	9.73	17.87	8.88	10.12
cis_mRNA_dw20k	4594	NA	LTCONS_00005825	NM_001267080.1	NC_003280.10	265559	266064	373	+	NC_003280.10	258481	260966	1560	+	*	0.7677	0.7846	0.41	1.91	0.88	2.76	2.32	0.96	3.21	1.22	1.79	1.2	1.84	2.64	0	0.83	0.12	0.9	1.22	0	0.74	0.44	0.72	0.38	1.27	1.01
cis_mRNA_dw20k	12815	NA	LTCONS_00005853	NM_001313564.1	NC_003280.10	394855	396523	1624	+	NC_003280.10	380723	382041	810	+	*	0.6317	0.6293	0.89	0.31	1.26	0.31	0.78	0.59	0.79	0.6	0.26	0.64	0.43	0.38	0.29	0.09	0.48	0	0.8	0	0.12	0.03	0	0	0.13	0.04
cis_mRNA_dw20k	14495	NA	LTCONS_00005853	NM_001267081.1	NC_003280.10	394855	396523	1624	+	NC_003280.10	378651	380361	975	+	*	0.7202	0.7736	0.89	0.31	1.26	0.31	0.78	0.59	0.79	0.6	0.26	0.64	0.43	0.38	0.33	0.07	0.36	0	0.2	0	0.58	0.12	0	0	0.1	0
cis_mRNA_dw20k	169	NA	LTCONS_00005853	NM_061323.2	NC_003280.10	394855	396523	1624	+	NC_003280.10	396691	398683	1050	-	*	-0.6976	-0.6807	0.89	0.31	1.26	0.31	0.78	0.59	0.79	0.6	0.26	0.64	0.43	0.38	0.74	1.39	0	2.44	0.74	0.21	1.27	1.73	1.9	0.31	2.42	1.11
cis_mRNA_dw20k	19021	NA	LTCONS_00005853	NM_061318.3	NC_003280.10	394855	396523	1624	+	NC_003280.10	375250	375835	483	+	*	0.7581	0.7668	0.89	0.31	1.26	0.31	0.78	0.59	0.79	0.6	0.26	0.64	0.43	0.38	0.35	0	0.4	0.12	0.13	0.13	0.2	0	0	0.28	0.18	0.19
cis_mRNA_dw20k	7035	NA	LTCONS_00005853	NM_061321.5	NC_003280.10	394855	396523	1624	+	NC_003280.10	386239	387821	864	+	*	0.829	0.7706	0.89	0.31	1.26	0.31	0.78	0.59	0.79	0.6	0.26	0.64	0.43	0.38	76.17	43.28	87.57	46.05	77.41	84.19	71.58	50.67	44.86	80.41	45.95	43.53
cis_mRNA_dw20k	9705	NA	LTCONS_00005853	NM_001267082.1	NC_003280.10	394855	396523	1624	+	NC_003280.10	406227	410919	1785	-	*	0.7322	0.697	0.89	0.31	1.26	0.31	0.78	0.59	0.79	0.6	0.26	0.64	0.43	0.38	21.1	10.82	22.02	10.8	24.94	21.54	21.23	12.21	15.64	22.54	11.16	11.53
cis_mRNA_up10k	6160	NA	LTCONS_00005853	NM_061324.6	NC_003280.10	394855	396523	1624	+	NC_003280.10	402682	404120	1248	+	*	-0.7155	-0.641	0.89	0.31	1.26	0.31	0.78	0.59	0.79	0.6	0.26	0.64	0.43	0.38	5.72	15.22	1.67	22.73	2.96	3.1	6.99	26.64	21.45	5.15	21.63	31.79
cis_mRNA_up10k	9502	NA	LTCONS_00005853	NM_061320.2	NC_003280.10	394855	396523	1624	+	NC_003280.10	382366	385354	1659	-	*	-0.7771	-0.6445	0.89	0.31	1.26	0.31	0.78	0.59	0.79	0.6	0.26	0.64	0.43	0.38	2.47	7.66	1.75	8.3	1.64	1.73	1.94	7.9	8.63	1.76	9.54	8.71
cis_mRNA_up10k	7782	NA	LTCONS_00005859	NM_001313589.1	NC_003280.10	417013	418109	1097	+	NC_003280.10	406227	409232	1002	-	*	0.7558	0.7496	0.68	0.22	0.19	0.24	0.32	0.43	0.48	0.19	0.11	0.1	0.35	0.23	11.81	3.54	4.09	5.91	3.73	9.01	7.71	2.12	1.65	0	2.23	10.02
cis_mRNA_dw20k	18941	NA	LTCONS_00005862	NM_170970.5	NC_003280.10	435469	436063	595	+	NC_003280.10	411232	416529	1905	+	*	0.8142	0.8234	0.67	0.09	1.52	0	0.91	0.05	0.6	0	0.09	0.11	0.09	0.05	65.83	63.38	76.14	57.35	85.44	53.06	75.9	58.95	55.51	58.97	64.32	57.89
cis_mRNA_dw20k	3291	NA	LTCONS_00005862	MTCONS_00005861	NC_003280.10	435469	436063	595	+	NC_003280.10	429471	432179	1999	+	*	0.6924	0.7367	0.67	0.09	1.52	0	0.91	0.05	0.6	0	0.09	0.11	0.09	0.05	0.97	0.02	0.58	0.01	0.3	0.14	0.75	0.01	0.01	0.25	0	0.06
cis_mRNA_up10k	5480	NA	LTCONS_00005862	NM_061335.4	NC_003280.10	435469	436063	595	+	NC_003280.10	441542	443674	1119	+	*	0.7886	0.6991	0.67	0.09	1.52	0	0.91	0.05	0.6	0	0.09	0.11	0.09	0.05	4.48	0	3.04	0.08	4.61	1.05	3.97	0	0.02	1.02	0.04	0.09
cis_mRNA_dw20k	19662	NA	LTCONS_00005863	MTCONS_00009048	NC_003280.10	436389	439115	1914	+	NC_003280.10	458776	470470	4107	-	*	0.7704	0.7614	1.45	0.58	1.6	0.36	1.11	0.49	1.23	0.36	0.11	0.58	0.3	0.43	9.54	3.61	9.86	4.77	8.54	9.37	9.41	4	4.76	8.8	3.87	5.29
cis_mRNA_dw20k	19861	NA	LTCONS_00005863	NM_170970.5	NC_003280.10	436389	439115	1914	+	NC_003280.10	411232	416529	1905	+	*	0.757	0.7123	1.45	0.58	1.6	0.36	1.11	0.49	1.23	0.36	0.11	0.58	0.3	0.43	65.83	63.38	76.14	57.35	85.44	53.06	75.9	58.95	55.51	58.97	64.32	57.89
cis_mRNA_dw20k	4211	NA	LTCONS_00005863	MTCONS_00005861	NC_003280.10	436389	439115	1914	+	NC_003280.10	429471	432179	1999	+	*	0.898	0.9293	1.45	0.58	1.6	0.36	1.11	0.49	1.23	0.36	0.11	0.58	0.3	0.43	0.97	0.02	0.58	0.01	0.3	0.14	0.75	0.01	0.01	0.25	0	0.06
cis_mRNA_up10k	2428	NA	LTCONS_00005863	NM_061335.4	NC_003280.10	436389	439115	1914	+	NC_003280.10	441542	443674	1119	+	*	0.8972	0.7417	1.45	0.58	1.6	0.36	1.11	0.49	1.23	0.36	0.11	0.58	0.3	0.43	4.48	0	3.04	0.08	4.61	1.05	3.97	0	0.02	1.02	0.04	0.09
cis_mRNA_up10k	5267	NA	LTCONS_00005863	MTCONS_00009042	NC_003280.10	436389	439115	1914	+	NC_003280.10	427436	431123	3317	-	*	0.8758	0.7982	1.45	0.58	1.6	0.36	1.11	0.49	1.23	0.36	0.11	0.58	0.3	0.43	1.4	0	0.79	0.01	1.24	0.36	1.42	0.05	0	0.3	0	0.01
cis_mRNA_dw20k	17106	NA	LTCONS_00005865	NM_001267083.1	NC_003280.10	436867	439115	946	+	NC_003280.10	456220	457871	537	-	*	0.7412	0.6713	1.14	0.2	0.54	0.67	2.68	1.11	1.94	0.6	0.63	1.03	0.18	0.08	23.67	10.24	30.8	18.38	33.62	26.83	24.83	13.94	15.68	26.61	14.3	15.35
cis_mRNA_up10k	2428	NA	LTCONS_00005865	NM_061335.4	NC_003280.10	436867	439115	946	+	NC_003280.10	441542	443674	1119	+	*	0.7816	0.7005	1.14	0.2	0.54	0.67	2.68	1.11	1.94	0.6	0.63	1.03	0.18	0.08	4.48	0	3.04	0.08	4.61	1.05	3.97	0	0.02	1.02	0.04	0.09
cis_mRNA_up10k	5745	NA	LTCONS_00005865	MTCONS_00009042	NC_003280.10	436867	439115	946	+	NC_003280.10	427436	431123	3317	-	*	0.7794	0.7549	1.14	0.2	0.54	0.67	2.68	1.11	1.94	0.6	0.63	1.03	0.18	0.08	1.4	0	0.79	0.01	1.24	0.36	1.42	0.05	0	0.3	0	0.01
tran	25949	NA	LTCONS_00005865	NM_001267082.1	NC_003280.10	436867	439115	946	+	NC_003280.10	406227	410919	1785	-	-429.87	0.7647	0.6154	1.14	0.2	0.54	0.67	2.68	1.11	1.94	0.6	0.63	1.03	0.18	0.08	21.1	10.82	22.02	10.8	24.94	21.54	21.23	12.21	15.64	22.54	11.16	11.53
tran	27456	NA	LTCONS_00005865	NM_001313588.1	NC_003280.10	436867	439115	946	+	NC_003280.10	406227	409412	1134	-	-381.56	0.628	0.6713	1.14	0.2	0.54	0.67	2.68	1.11	1.94	0.6	0.63	1.03	0.18	0.08	5.57	2.43	6.65	4.8	15.21	2.84	5.95	5.13	4.86	18.09	2.31	0
cis_mRNA_dw20k	15695	NA	LTCONS_00005868	NM_061335.4	NC_003280.10	459368	461668	2301	+	NC_003280.10	441542	443674	1119	+	*	0.9859	0.8988	0.47	0	0.29	0	0.59	0.06	0.41	0	0.02	0.06	0	0	4.48	0	3.04	0.08	4.61	1.05	3.97	0	0.02	1.02	0.04	0.09
cis_mRNA_dw20k	346	NA	LTCONS_00005868	NM_001316872.1	NC_003280.10	459368	461668	2301	+	NC_003280.10	462013	466536	990	-	*	0.6839	0.7059	0.47	0	0.29	0	0.59	0.06	0.41	0	0.02	0.06	0	0	18.5	8.59	19.46	6.71	18.66	20	19.46	9.24	8.66	20.25	6.83	6.88
cis_mRNA_dw20k	5928	NA	LTCONS_00005868	MTCONS_00009051	NC_003280.10	459368	461668	2301	+	NC_003280.10	467595	475935	4239	-	*	-0.751	-0.8572	0.47	0	0.29	0	0.59	0.06	0.41	0	0.02	0.06	0	0	26.32	37.83	26.72	40.09	22	27.3	24.58	35.27	38.29	22.81	41.22	40.49
cis_mRNA_dw20k	6843	NA	LTCONS_00005868	NM_061340.5	NC_003280.10	459368	461668	2301	+	NC_003280.10	468510	470470	330	-	*	-0.6741	-0.7446	0.47	0	0.29	0	0.59	0.06	0.41	0	0.02	0.06	0	0	4.46	28.19	0	26.53	12.11	12.74	6.01	39.19	24.86	18.14	25.74	10.51
cis_mRNA_overlap	0	Lnc-AntiOverlap-mRNA	LTCONS_00005868	MTCONS_00009048	NC_003280.10	459368	461668	2301	+	NC_003280.10	458776	470470	4107	-	-2915.68	0.7129	0.7882	0.47	0	0.29	0	0.59	0.06	0.41	0	0.02	0.06	0	0	9.54	3.61	9.86	4.77	8.54	9.37	9.41	4	4.76	8.8	3.87	5.29
cis_mRNA_up10k	1498	NA	LTCONS_00005868	NM_001267083.1	NC_003280.10	459368	461668	2301	+	NC_003280.10	456220	457871	537	-	*	0.7373	0.8246	0.47	0	0.29	0	0.59	0.06	0.41	0	0.02	0.06	0	0	23.67	10.24	30.8	18.38	33.62	26.83	24.83	13.94	15.68	26.61	14.3	15.35
cis_mRNA_dw20k	1113	NA	LTCONS_00005869	NM_061340.5	NC_003280.10	467143	467398	256	+	NC_003280.10	468510	470470	330	-	*	-0.6016	-0.6504	0.2	0	0.37	0	0	0	0	0	0	0	0	0	4.46	28.19	0	26.53	12.11	12.74	6.01	39.19	24.86	18.14	25.74	10.51
cis_mRNA_up10k	292	NA	LTCONS_00005870	MTCONS_00009051	NC_003280.10	476226	477795	991	+	NC_003280.10	467595	475935	4239	-	*	-0.8869	-0.6434	6.37	3.28	6.75	2.07	6.51	7.08	7.57	2.34	2	5.91	3.43	3.54	26.32	37.83	26.72	40.09	22	27.3	24.58	35.27	38.29	22.81	41.22	40.49
cis_mRNA_up10k	292	NA	LTCONS_00005870	NM_061341.5	NC_003280.10	476226	477795	991	+	NC_003280.10	471470	475935	1995	-	*	-0.7139	-0.6643	6.37	3.28	6.75	2.07	6.51	7.08	7.57	2.34	2	5.91	3.43	3.54	48.26	78.88	62.68	69.45	66.94	41.53	57.2	87.29	64.23	50.32	78.9	67.95
cis_mRNA_up10k	5757	NA	LTCONS_00005870	MTCONS_00009048	NC_003280.10	476226	477795	991	+	NC_003280.10	458776	470470	4107	-	*	0.9384	0.7832	6.37	3.28	6.75	2.07	6.51	7.08	7.57	2.34	2	5.91	3.43	3.54	9.54	3.61	9.86	4.77	8.54	9.37	9.41	4	4.76	8.8	3.87	5.29
cis_mRNA_up10k	5757	NA	LTCONS_00005870	NM_061340.5	NC_003280.10	476226	477795	991	+	NC_003280.10	468510	470470	330	-	*	-0.8128	-0.7552	6.37	3.28	6.75	2.07	6.51	7.08	7.57	2.34	2	5.91	3.43	3.54	4.46	28.19	0	26.53	12.11	12.74	6.01	39.19	24.86	18.14	25.74	10.51
cis_mRNA_up10k	7075	NA	LTCONS_00005870	NM_061345.7	NC_003280.10	476226	477795	991	+	NC_003280.10	484869	490279	1968	+	*	0.9481	0.7413	6.37	3.28	6.75	2.07	6.51	7.08	7.57	2.34	2	5.91	3.43	3.54	58.59	34.59	59.92	32.32	59.19	54.45	59	34.22	33.46	52.62	32.01	30.96
cis_mRNA_up10k	9691	NA	LTCONS_00005870	NM_001316872.1	NC_003280.10	476226	477795	991	+	NC_003280.10	462013	466536	990	-	*	0.9369	0.7285	6.37	3.28	6.75	2.07	6.51	7.08	7.57	2.34	2	5.91	3.43	3.54	18.5	8.59	19.46	6.71	18.66	20	19.46	9.24	8.66	20.25	6.83	6.88
cis_mRNA_dw20k	1350	NA	LTCONS_00005897	NM_061373.4	NC_003280.10	629859	632467	1929	+	NC_003280.10	627514	628510	876	+	*	0.9027	0.9308	0.98	0	0.54	0	0.8	0.35	1.3	0	0	0.16	0	0	16.96	0.2	7.98	0	14.28	6.32	10.43	0	0.03	4.02	0	0
cis_mRNA_dw20k	8599	NA	LTCONS_00005897	NM_061377.4	NC_003280.10	629859	632467	1929	+	NC_003280.10	641065	650351	1299	-	*	0.6148	0.8025	0.98	0	0.54	0	0.8	0.35	1.3	0	0	0.16	0	0	28.94	15.36	23.35	13.99	18.98	21.41	21.97	10.93	15.92	28.44	13.59	15.75
tran	186186	NA	LTCONS_00005897	NM_061335.4	NC_003280.10	629859	632467	1929	+	NC_003280.10	441542	443674	1119	+	-393.27	0.9416	0.9085	0.98	0	0.54	0	0.8	0.35	1.3	0	0	0.16	0	0	4.48	0	3.04	0.08	4.61	1.05	3.97	0	0.02	1.02	0.04	0.09
tran	198737	NA	LTCONS_00005897	MTCONS_00009042	NC_003280.10	629859	632467	1929	+	NC_003280.10	427436	431123	3317	-	-622.09	0.9802	0.9451	0.98	0	0.54	0	0.8	0.35	1.3	0	0	0.16	0	0	1.4	0	0.79	0.01	1.24	0.36	1.42	0.05	0	0.3	0	0.01
tran	205675	NA	LTCONS_00005897	MTCONS_00009040	NC_003280.10	629859	632467	1929	+	NC_003280.10	423561	424185	517	-	-197.81	0.6657	0.894	0.98	0	0.54	0	0.8	0.35	1.3	0	0	0.16	0	0	0.25	0	0.79	0	1.89	0.24	0.85	0.05	0	0.38	0	0
cis_mRNA_dw20k	5445	NA	LTCONS_00005923	NM_061399.4	NC_003280.10	734135	734570	385	+	NC_003280.10	740014	740847	501	-	*	0.8622	0.8593	0	0.58	0	0.16	0	0	0	0	0.43	0	1	0.18	0.26	2.84	0.06	0.5	0.44	0.06	0.32	0.87	1.4	0	2.19	1.22
cis_mRNA_dw20k	6668	NA	LTCONS_00005923	MTCONS_00009109	NC_003280.10	734135	734570	385	+	NC_003280.10	741237	745066	2484	-	*	0.7335	0.8571	0	0.58	0	0.16	0	0	0	0	0.43	0	1	0.18	0	2.01	0	1.49	0.05	0	0	1.22	1.36	0	1.56	1.11
cis_mRNA_dw20k	18030	NA	LTCONS_00005926	MTCONS_00009123	NC_003280.10	786365	786911	547	+	NC_003280.10	804940	806742	1538	-	*	0.8287	0.6763	0	0.5	0.06	0.54	0	0.11	0.11	0.1	0.31	0	0.62	0.65	0.02	0.74	0	0.35	0.05	0	0	0.35	0.56	0	1.05	0.47
cis_mRNA_dw20k	3828	NA	LTCONS_00005926	MTCONS_00009118	NC_003280.10	786365	786911	547	+	NC_003280.10	790738	791933	882	-	*	0.8726	0.79	0	0.5	0.06	0.54	0	0.11	0.11	0.1	0.31	0	0.62	0.65	0	0.61	0.09	1.18	0.16	0	0.12	0.65	1.13	0	1.14	1.14
cis_mRNA_dw20k	9658	NA	LTCONS_00005926	NM_061404.3	NC_003280.10	786365	786911	547	+	NC_003280.10	775367	776708	567	+	*	0.7702	0.7584	0	0.5	0.06	0.54	0	0.11	0.11	0.1	0.31	0	0.62	0.65	0.28	1.3	0.05	1.79	0.76	0.37	0.43	1.25	1.68	0.17	1.37	1.28
cis_mRNA_dw20k	9768	NA	LTCONS_00005926	MTCONS_00009122	NC_003280.10	786365	786911	547	+	NC_003280.10	796678	798384	1363	-	*	0.8319	0.6898	0	0.5	0.06	0.54	0	0.11	0.11	0.1	0.31	0	0.62	0.65	0.04	0.7	0	0.49	0.02	0	0.02	0.3	0.85	0	0.61	0.61
cis_mRNA_up10k	3365	NA	LTCONS_00005926	NM_061406.1	NC_003280.10	786365	786911	547	+	NC_003280.10	781884	783001	930	-	*	0.8833	0.776	0	0.5	0.06	0.54	0	0.11	0.11	0.1	0.31	0	0.62	0.65	0.21	4.9	0.12	4.32	0.06	0.03	0.2	3.64	4.08	0.09	4.95	4.53
cis_mRNA_dw20k	111	NA	LTCONS_00005936	MTCONS_00005935	NC_003280.10	829714	830318	562	+	NC_003280.10	827898	829604	896	+	*	0.8397	0.8277	0.28	0.24	0	0.52	0.05	0	0.11	0.37	0.4	0	0.69	0.47	0.09	0.63	0	0.49	0.03	0	0.03	0.43	0.36	0	0.62	0.38
cis_mRNA_dw20k	14971	NA	LTCONS_00005936	NM_061430.1	NC_003280.10	829714	830318	562	+	NC_003280.10	845288	845686	354	-	*	0.9403	0.9566	0.28	0.24	0	0.52	0.05	0	0.11	0.37	0.4	0	0.69	0.47	0.45	2.07	0	3.71	0	0	0	2.89	3.59	0	4.27	3.17
cis_mRNA_dw20k	16654	NA	LTCONS_00005936	NM_061431.3	NC_003280.10	829714	830318	562	+	NC_003280.10	846971	848600	1230	-	*	0.8886	0.8592	0.28	0.24	0	0.52	0.05	0	0.11	0.37	0.4	0	0.69	0.47	26.44	73.75	17.59	97.94	16.48	20.01	18.09	81.23	92.96	20.7	89.43	96.5
cis_mRNA_dw20k	17828	NA	LTCONS_00005936	NM_061416.2	NC_003280.10	829714	830318	562	+	NC_003280.10	808757	811887	2397	+	*	0.8344	0.838	0.28	0.24	0	0.52	0.05	0	0.11	0.37	0.4	0	0.69	0.47	0.25	3.11	0.1	1.74	0.2	0.03	0.07	1.38	2.11	0.01	3.99	2.54
cis_mRNA_dw20k	2215	NA	LTCONS_00005936	NM_061423.2	NC_003280.10	829714	830318	562	+	NC_003280.10	825862	827500	927	+	*	0.8429	0.8572	0.28	0.24	0	0.52	0.05	0	0.11	0.37	0.4	0	0.69	0.47	0.27	4.58	0.03	3.51	0.06	0.09	0.09	2.24	3.37	0	4.73	4.52
cis_mRNA_up10k	6885	NA	LTCONS_00005936	NM_061421.1	NC_003280.10	829714	830318	562	+	NC_003280.10	822516	822830	315	-	*	0.8097	0.8184	0.28	0.24	0	0.52	0.05	0	0.11	0.37	0.4	0	0.69	0.47	0.83	11	0.39	16.17	0.25	0	0.13	16.92	17.46	0	11.46	14.32
cis_mRNA_up10k	9196	NA	LTCONS_00005936	NM_061419.1	NC_003280.10	829714	830318	562	+	NC_003280.10	818657	820519	1398	-	*	0.7889	0.6645	0.28	0.24	0	0.52	0.05	0	0.11	0.37	0.4	0	0.69	0.47	0	3.73	0.24	2.05	0	0	0	2.27	3.23	0	3.51	3.48
cis_mRNA_dw20k	19265	NA	LTCONS_00005939	MTCONS_00005935	NC_003280.10	848868	849216	258	+	NC_003280.10	827898	829604	896	+	*	0.7855	0.7832	0.4	0.48	0	0.61	0	0	0	0	0.33	0	0.8	0.53	0.09	0.63	0	0.49	0.03	0	0.03	0.43	0.36	0	0.62	0.38
cis_mRNA_dw20k	3784	NA	LTCONS_00005939	NM_061429.1	NC_003280.10	848868	849216	258	+	NC_003280.10	844274	845085	678	+	*	0.8238	0.7777	0.4	0.48	0	0.61	0	0	0	0	0.33	0	0.8	0.53	0.26	3.26	0.04	3.16	0.22	0.04	0.17	1.34	3.62	0	3.48	3.82
cis_mRNA_up10k	269	NA	LTCONS_00005939	NM_061431.3	NC_003280.10	848868	849216	258	+	NC_003280.10	846971	848600	1230	-	*	0.7404	0.7801	0.4	0.48	0	0.61	0	0	0	0	0.33	0	0.8	0.53	26.44	73.75	17.59	97.94	16.48	20.01	18.09	81.23	92.96	20.7	89.43	96.5
cis_mRNA_up10k	3183	NA	LTCONS_00005939	NM_061430.1	NC_003280.10	848868	849216	258	+	NC_003280.10	845288	845686	354	-	*	0.7736	0.8476	0.4	0.48	0	0.61	0	0	0	0	0.33	0	0.8	0.53	0.45	2.07	0	3.71	0	0	0	2.89	3.59	0	4.27	3.17
cis_mRNA_dw20k	16760	NA	LTCONS_00005942	NM_061429.1	NC_003280.10	861844	862406	504	+	NC_003280.10	844274	845085	678	+	*	0.9134	0.9051	0.33	7.21	0.38	16.47	0.06	0	0.06	7.91	16.79	0	8.69	18.32	0.26	3.26	0.04	3.16	0.22	0.04	0.17	1.34	3.62	0	3.48	3.82
cis_mRNA_up10k	5635	NA	LTCONS_00005942	NM_061433.1	NC_003280.10	861844	862406	504	+	NC_003280.10	851656	856210	4098	-	*	0.8664	0.8183	0.33	7.21	0.38	16.47	0.06	0	0.06	7.91	16.79	0	8.69	18.32	0	0	0	0.11	0	0	0	0	0.06	0	0.01	0.08
cis_mRNA_up10k	6426	NA	LTCONS_00005942	NM_061435.5	NC_003280.10	861844	862406	504	+	NC_003280.10	868831	871599	1527	+	*	-0.7309	-0.6702	0.33	7.21	0.38	16.47	0.06	0	0.06	7.91	16.79	0	8.69	18.32	24.71	0.15	20.25	0.07	25.05	6.34	21.76	0.13	0.14	6.06	0.12	0.19
cis_mRNA_dw20k	13280	NA	LTCONS_00005950	NM_001318297.1	NC_003280.10	893261	894256	944	+	NC_003280.10	907535	909631	1236	-	*	0.6007	0.7459	0.56	0.1	0.75	0.26	0.36	0.67	0.71	0.36	0.34	0.54	0.05	0.38	1.12	0	0.78	0	1.11	0.19	1.77	0	0	0.2	0	0
cis_mRNA_dw20k	14786	NA	LTCONS_00005950	NM_182192.3	NC_003280.10	893261	894256	944	+	NC_003280.10	873212	878476	2733	+	*	0.6082	0.6935	0.56	0.1	0.75	0.26	0.36	0.67	0.71	0.36	0.34	0.54	0.05	0.38	41.71	15.78	29.62	18.26	42.8	25.06	36.94	16.48	18.59	24.74	13.15	16.34
cis_mRNA_dw20k	9278	NA	LTCONS_00005950	MTCONS_00005945	NC_003280.10	893261	894256	944	+	NC_003280.10	873212	883984	6586	+	*	0.6065	0.6351	0.56	0.1	0.75	0.26	0.36	0.67	0.71	0.36	0.34	0.54	0.05	0.38	3.43	1.48	2.23	1.74	3.05	2.52	3.18	1.45	1.91	1.7	1.51	1.74
cis_mRNA_up10k	9931	NA	LTCONS_00005950	MTCONS_00005952	NC_003280.10	893261	894256	944	+	NC_003280.10	904186	906454	1733	+	*	0.8122	0.8862	0.56	0.1	0.75	0.26	0.36	0.67	0.71	0.36	0.34	0.54	0.05	0.38	2.66	0.89	1.83	0.75	1.76	2.07	2.65	1.31	1.03	1.77	0.92	1.08
tran	1620492	NA	LTCONS_00005950	MTCONS_00009490	NC_003280.10	893261	894256	944	+	NC_003280.10	2514747	2516770	1682	-	-382.18	0.6337	0.725	0.56	0.1	0.75	0.26	0.36	0.67	0.71	0.36	0.34	0.54	0.05	0.38	5.51	4.15	5.6	1.98	3.82	5.44	4.59	3.96	2.83	4.62	3.81	2.65
cis_mRNA_dw20k	11333	NA	LTCONS_00005959	NM_061449.5	NC_003280.10	928740	930878	306	+	NC_003280.10	916080	917408	1224	+	*	-0.8572	-0.6168	0.58	16.23	0.13	10.67	0.26	0	0.27	12.65	11.72	0	13.54	13.86	2.83	0.04	1.7	0	2.9	1.08	2.34	0.02	0	1.12	0	0
cis_mRNA_dw20k	13567	NA	LTCONS_00005959	NM_061448.3	NC_003280.10	928740	930878	306	+	NC_003280.10	913685	915174	1146	+	*	-0.9505	-0.7881	0.58	16.23	0.13	10.67	0.26	0	0.27	12.65	11.72	0	13.54	13.86	6.23	0.62	4.61	1.18	3.91	4.75	4.68	0.89	1.04	4.19	0.99	1.08
cis_mRNA_dw20k	15683	NA	LTCONS_00005959	NM_061459.3	NC_003280.10	928740	930878	306	+	NC_003280.10	946560	948181	1233	-	*	-0.8813	-0.8196	0.58	16.23	0.13	10.67	0.26	0	0.27	12.65	11.72	0	13.54	13.86	23.39	3.45	14.18	4.44	12.77	25.15	14.26	5.89	5.17	22.12	3.61	5.28
cis_mRNA_dw20k	3593	NA	LTCONS_00005959	NM_061451.1	NC_003280.10	928740	930878	306	+	NC_003280.10	923888	925148	1167	+	*	-0.7734	-0.697	0.58	16.23	0.13	10.67	0.26	0	0.27	12.65	11.72	0	13.54	13.86	6.69	0.18	2.29	0.32	2.69	2.54	2.45	0.16	0.17	2.28	0.04	0.28
cis_mRNA_dw20k	9324	NA	LTCONS_00005959	NM_001129156.1	NC_003280.10	928740	930878	306	+	NC_003280.10	917624	919417	1251	+	*	-0.7797	-0.7155	0.58	16.23	0.13	10.67	0.26	0	0.27	12.65	11.72	0	13.54	13.86	0.38	0	0.21	0	0.4	0.08	0.23	0	0.02	0.11	0	0
cis_mRNA_up10k	1337	NA	LTCONS_00005959	MTCONS_00009149	NC_003280.10	928740	930878	306	+	NC_003280.10	926491	927404	738	-	*	0.9732	0.9282	0.58	16.23	0.13	10.67	0.26	0	0.27	12.65	11.72	0	13.54	13.86	0.9	13.33	0.62	11.62	1.71	0.15	1.34	8.93	12.29	0.08	14.54	14.69
cis_mRNA_up10k	2145	NA	LTCONS_00005959	MTCONS_00005961	NC_003280.10	928740	930878	306	+	NC_003280.10	933022	936926	2127	+	*	0.9918	0.8717	0.58	16.23	0.13	10.67	0.26	0	0.27	12.65	11.72	0	13.54	13.86	0.44	7.36	0	6.07	0	0	0	6	5.92	0	6.33	5.82
cis_mRNA_up10k	307	NA	LTCONS_00005959	NM_061454.4	NC_003280.10	928740	930878	306	+	NC_003280.10	931184	932294	909	+	*	-0.6406	-0.7023	0.58	16.23	0.13	10.67	0.26	0	0.27	12.65	11.72	0	13.54	13.86	1.03	0	0.36	0	0.7	0.06	1.22	0	0.03	0.06	0	0
cis_mRNA_dw20k	15702	NA	LTCONS_00006003	NM_061497.3	NC_003280.10	1063897	1067330	3434	+	NC_003280.10	1046505	1048196	993	+	*	0.8567	0.7041	0.47	0.28	0.6	0.15	0.82	0.27	1.07	0.16	0.17	0.18	0.09	0.27	0.28	0	0.05	0	0.51	0.11	0.4	0.07	0	0	0	0.05
cis_mRNA_dw20k	335	NA	LTCONS_00006003	MTCONS_00006000	NC_003280.10	1063897	1067330	3434	+	NC_003280.10	1055024	1063563	1710	+	*	0.8596	0.7796	0.47	0.28	0.6	0.15	0.82	0.27	1.07	0.16	0.17	0.18	0.09	0.27	1.24	0	0.63	0	1.06	0.28	1.19	0	0	0.29	0	0
cis_mRNA_dw20k	335	NA	LTCONS_00006003	MTCONS_00006001	NC_003280.10	1063897	1067330	3434	+	NC_003280.10	1055024	1063563	6370	+	*	0.8895	0.704	0.47	0.28	0.6	0.15	0.82	0.27	1.07	0.16	0.17	0.18	0.09	0.27	3.27	0.47	2.63	0.86	2.88	0.37	3.5	0.46	0.67	0.57	0.39	0.88
cis_mRNA_dw20k	8402	NA	LTCONS_00006003	NM_061499.2	NC_003280.10	1063897	1067330	3434	+	NC_003280.10	1055024	1055496	366	+	*	0.9361	0.8437	0.47	0.28	0.6	0.15	0.82	0.27	1.07	0.16	0.17	0.18	0.09	0.27	0.83	0	3.54	0	2.52	0.45	4.67	0	0	0	0	0
cis_mRNA_up10k	3150	NA	LTCONS_00006003	NM_061501.3	NC_003280.10	1063897	1067330	3434	+	NC_003280.10	1059713	1060748	894	-	*	0.6031	0.607	0.47	0.28	0.6	0.15	0.82	0.27	1.07	0.16	0.17	0.18	0.09	0.27	5.13	0	3.3	0.08	3.43	2.91	2.48	0.13	0	2.06	0.03	0.06
tran	3338126	NA	LTCONS_00006003	MTCONS_00006712	NC_003280.10	1063897	1067330	3434	+	NC_003280.10	4405455	4417079	5795	+	-1365.91	0.7849	0.7632	0.47	0.28	0.6	0.15	0.82	0.27	1.07	0.16	0.17	0.18	0.09	0.27	1.68	0.18	0.7	0.27	1.34	0.58	1.29	0.17	0.3	0.37	0.22	0.37
cis_mRNA_dw20k	7036	NA	LTCONS_00006040	NM_001267099.1	NC_003280.10	1294699	1295627	597	+	NC_003280.10	1302662	1306119	885	-	*	-0.8055	-0.7909	0.21	0.32	0	1.01	0.3	0.05	0.2	0.3	0.79	0	0.41	1.01	35.32	31.54	35.48	26.78	38.62	33.99	35.35	30.32	30.1	34.88	29.9	27.1
cis_mRNA_up10k	459	NA	LTCONS_00006040	NM_061541.4	NC_003280.10	1294699	1295627	597	+	NC_003280.10	1296085	1296746	534	+	*	-0.6968	-0.7522	0.21	0.32	0	1.01	0.3	0.05	0.2	0.3	0.79	0	0.41	1.01	5.17	0.21	3.32	0.31	3.09	3.8	2.84	0.15	0.05	3.27	0	0.06
cis_mRNA_up10k	9186	NA	LTCONS_00006040	NM_061537.4	NC_003280.10	1294699	1295627	597	+	NC_003280.10	1282009	1285514	2652	-	*	0.7293	0.8225	0.21	0.32	0	1.01	0.3	0.05	0.2	0.3	0.79	0	0.41	1.01	1.06	22.07	0.69	19.43	0.36	0.13	0.37	18.55	19.39	0.1	23.15	22.3
cis_mRNA_dw20k	13533	NA	LTCONS_00006067	NM_061575.2	NC_003280.10	1447010	1449813	2268	+	NC_003280.10	1463345	1466544	1035	-	*	-0.816	-0.7832	0.67	0.13	1.15	0.11	0.84	0.62	0.52	0.22	0.09	0.63	0.16	0.2	2.83	146.44	3.99	115.01	0.39	0.87	0.26	25.76	116.17	0.57	112.45	89.2
cis_mRNA_dw20k	7408	NA	LTCONS_00006067	NM_061572.5	NC_003280.10	1447010	1449813	2268	+	NC_003280.10	1438510	1439603	426	+	*	0.8137	0.7622	0.67	0.13	1.15	0.11	0.84	0.62	0.52	0.22	0.09	0.63	0.16	0.2	18.22	4.35	27.38	9.49	26.64	34.36	23.25	8.23	7.19	35.29	5.34	8.27
cis_mRNA_dw20k	936	NA	LTCONS_00006067	NM_061574.1	NC_003280.10	1447010	1449813	2268	+	NC_003280.10	1445225	1446075	741	+	*	-0.6783	-0.6525	0.67	0.13	1.15	0.11	0.84	0.62	0.52	0.22	0.09	0.63	0.16	0.2	0	0.17	0.04	0.34	0.04	0	0.04	0.37	0.25	0	0.39	0.73
cis_mRNA_up10k	265	NA	LTCONS_00006067	NM_001306600.1	NC_003280.10	1447010	1449813	2268	+	NC_003280.10	1440066	1446746	1098	-	*	0.7442	0.6105	0.67	0.13	1.15	0.11	0.84	0.62	0.52	0.22	0.09	0.63	0.16	0.2	0.16	0.09	0.6	0.26	0.83	0.26	0.35	0.02	0.09	0.46	0.33	0.05
tran	5989580	NA	LTCONS_00006067	MTCONS_00010519	NC_003280.10	1447010	1449813	2268	+	NC_003280.10	7439392	7446551	7160	-	-2802.13	-0.6848	-0.704	0.67	0.13	1.15	0.11	0.84	0.62	0.52	0.22	0.09	0.63	0.16	0.2	0.09	0.27	0.05	0.68	0.05	0.02	0.07	0.03	0.65	0.04	0.23	0.53
tran	NA	NA	LTCONS_00006067	NM_001029077.2	NC_003280.10	1447010	1449813	2268	+	NC_003283.11	1692561	1693248	267	-	-133.02	0.8353	0.8616	0.67	0.13	1.15	0.11	0.84	0.62	0.52	0.22	0.09	0.63	0.16	0.2	1.92	0	1.62	0.15	1.67	1.55	1.81	0.82	0	1.14	0.76	0.33
cis_mRNA_dw20k	10477	NA	LTCONS_00006090	MTCONS_00009276	NC_003280.10	1592019	1596139	4121	+	NC_003280.10	1606615	1607589	927	-	*	-0.6709	-0.7179	0.22	0.85	0.33	0.67	0.26	0.2	0.31	0.36	0.57	0.21	0.63	0.88	0.56	0	0.76	0	0.77	0.38	1.04	0	0.05	0.28	0	0
cis_mRNA_dw20k	13178	NA	LTCONS_00006090	NM_061609.1	NC_003280.10	1592019	1596139	4121	+	NC_003280.10	1609316	1610715	1158	-	*	-0.7282	-0.6364	0.22	0.85	0.33	0.67	0.26	0.2	0.31	0.36	0.57	0.21	0.63	0.88	2.01	0	2.24	0.14	2.64	1.19	2.42	0.02	0.08	1.17	0.04	0.11
cis_mRNA_dw20k	16696	NA	LTCONS_00006090	NM_061611.5	NC_003280.10	1592019	1596139	4121	+	NC_003280.10	1612834	1614002	1002	-	*	-0.6474	-0.7368	0.22	0.85	0.33	0.67	0.26	0.2	0.31	0.36	0.57	0.21	0.63	0.88	0.84	0.05	0.43	0.07	1.36	0.58	0.9	0.02	0.05	0.17	0	0
cis_mRNA_dw20k	4691	NA	LTCONS_00006090	NM_001267104.1	NC_003280.10	1592019	1596139	4121	+	NC_003280.10	1586605	1587329	240	+	*	0.7285	0.6382	0.22	0.85	0.33	0.67	0.26	0.2	0.31	0.36	0.57	0.21	0.63	0.88	0.23	0.37	0	0.17	0	0	0	0.16	0.38	0	0	0.82
cis_mRNA_dw20k	8529	NA	LTCONS_00006090	NM_061606.3	NC_003280.10	1592019	1596139	4121	+	NC_003280.10	1604667	1606143	834	-	*	-0.7415	-0.7293	0.22	0.85	0.33	0.67	0.26	0.2	0.31	0.36	0.57	0.21	0.63	0.88	0.27	0	0.17	0	0.17	0.16	0.33	0	0	0.14	0	0
cis_mRNA_up10k	1891	NA	LTCONS_00006090	NM_061603.2	NC_003280.10	1592019	1596139	4121	+	NC_003280.10	1598029	1599472	927	+	*	0.8156	0.8231	0.22	0.85	0.33	0.67	0.26	0.2	0.31	0.36	0.57	0.21	0.63	0.88	0.33	1.6	0.21	2.47	0.18	0.06	0.32	0.49	2.91	0.06	2.2	1.94
cis_mRNA_up10k	7780	NA	LTCONS_00006090	NM_061601.2	NC_003280.10	1592019	1596139	4121	+	NC_003280.10	1582876	1584240	1266	-	*	0.9439	0.8713	0.22	0.85	0.33	0.67	0.26	0.2	0.31	0.36	0.57	0.21	0.63	0.88	0.04	1.16	0.04	0.75	0.08	0	0	0.25	1.04	0	0.94	1.03
cis_mRNA_dw20k	10425	NA	LTCONS_00006091	MTCONS_00009277	NC_003280.10	1596817	1597376	560	+	NC_003280.10	1607800	1609088	1185	-	*	-0.763	-0.669	0.37	1.16	0.28	0.55	0.06	0	0.24	1.44	0.49	0.24	1.2	0.95	1.16	0.24	1.32	1.14	0.67	1.31	1.6	0.45	0.96	1.07	0.18	0.92
cis_mRNA_dw20k	11941	NA	LTCONS_00006091	NM_061609.1	NC_003280.10	1596817	1597376	560	+	NC_003280.10	1609316	1610715	1158	-	*	-0.7594	-0.8406	0.37	1.16	0.28	0.55	0.06	0	0.24	1.44	0.49	0.24	1.2	0.95	2.01	0	2.24	0.14	2.64	1.19	2.42	0.02	0.08	1.17	0.04	0.11
cis_mRNA_dw20k	15459	NA	LTCONS_00006091	NM_061611.5	NC_003280.10	1596817	1597376	560	+	NC_003280.10	1612834	1614002	1002	-	*	-0.6961	-0.8471	0.37	1.16	0.28	0.55	0.06	0	0.24	1.44	0.49	0.24	1.2	0.95	0.84	0.05	0.43	0.07	1.36	0.58	0.9	0.02	0.05	0.17	0	0
cis_mRNA_dw20k	17418	NA	LTCONS_00006091	NM_061612.1	NC_003280.10	1596817	1597376	560	+	NC_003280.10	1614793	1616463	1296	-	*	-0.6249	-0.7215	0.37	1.16	0.28	0.55	0.06	0	0.24	1.44	0.49	0.24	1.2	0.95	0.48	0	2.36	0.02	1.85	0.47	1.68	0.02	0	0.65	0	0
cis_mRNA_dw20k	7292	NA	LTCONS_00006091	NM_061606.3	NC_003280.10	1596817	1597376	560	+	NC_003280.10	1604667	1606143	834	-	*	-0.7092	-0.753	0.37	1.16	0.28	0.55	0.06	0	0.24	1.44	0.49	0.24	1.2	0.95	0.27	0	0.17	0	0.17	0.16	0.33	0	0	0.14	0	0
cis_mRNA_dw20k	9240	NA	LTCONS_00006091	MTCONS_00009276	NC_003280.10	1596817	1597376	560	+	NC_003280.10	1606615	1607589	927	-	*	-0.7106	-0.8317	0.37	1.16	0.28	0.55	0.06	0	0.24	1.44	0.49	0.24	1.2	0.95	0.56	0	0.76	0	0.77	0.38	1.04	0	0.05	0.28	0	0
tran	NA	NA	LTCONS_00006091	MTCONS_00015645	NC_003280.10	1596817	1597376	560	+	NC_003281.10	4957585	4963039	4062	-	-259.86	-0.7022	-0.613	0.37	1.16	0.28	0.55	0.06	0	0.24	1.44	0.49	0.24	1.2	0.95	4.08	3.64	7.73	4.33	8.21	7.09	6.98	1.74	3.27	3.19	3.77	4.92
tran	NA	NA	LTCONS_00006091	MTCONS_00015646	NC_003280.10	1596817	1597376	560	+	NC_003281.10	4957585	4963039	3329	-	-259.86	-0.8562	-0.8231	0.37	1.16	0.28	0.55	0.06	0	0.24	1.44	0.49	0.24	1.2	0.95	33.11	12.76	34.32	15.35	30.15	39.14	30.33	12.52	16.39	30.32	15.39	18.08
tran	NA	NA	LTCONS_00006091	MTCONS_00027163	NC_003280.10	1596817	1597376	560	+	NC_003283.11	16036455	16038626	1948	+	-228.9	-0.677	-0.7391	0.37	1.16	0.28	0.55	0.06	0	0.24	1.44	0.49	0.24	1.2	0.95	3.21	0.84	2.74	1.08	1.19	4.65	2.37	1.15	1.45	3.66	0.79	1.5
cis_mRNA_dw20k	12524	NA	LTCONS_00006111	NM_001322712.1	NC_003280.10	1697554	1698041	396	+	NC_003280.10	1684048	1685031	531	+	*	0.6327	0.8476	0.47	0	0.09	0	1.15	0.18	0.53	0	0	0	0	0	0.68	0	0.13	0.05	0.39	0.06	1.14	0	0	0.06	0	0.06
cis_mRNA_dw20k	12696	NA	LTCONS_00006111	NM_061639.1	NC_003280.10	1697554	1698041	396	+	NC_003280.10	1684048	1684859	762	+	*	0.9468	0.8984	0.47	0	0.09	0	1.15	0.18	0.53	0	0	0	0	0	0.41	0.03	0.32	0	0.72	0.18	0.46	0.03	0	0.04	0.03	0.04
cis_mRNA_dw20k	14031	NA	LTCONS_00006111	NM_061638.1	NC_003280.10	1697554	1698041	396	+	NC_003280.10	1682539	1683524	936	+	*	0.9211	0.8968	0.47	0	0.09	0	1.15	0.18	0.53	0	0	0	0	0	2.17	0.08	0.96	0.03	2.76	0.63	2.41	0.13	0.08	0.49	0.13	0.08
cis_mRNA_dw20k	15421	NA	LTCONS_00006111	NM_001322711.1	NC_003280.10	1697554	1698041	396	+	NC_003280.10	1679381	1682134	1515	+	*	0.6419	0.8418	0.47	0	0.09	0	1.15	0.18	0.53	0	0	0	0	0	0.25	0	0.03	0.01	0.1	0.05	0.18	0.01	0	0.04	0	0.02
cis_mRNA_dw20k	4380	NA	LTCONS_00006111	NM_061647.1	NC_003280.10	1697554	1698041	396	+	NC_003280.10	1702420	1703463	984	-	*	0.8767	0.9323	0.47	0	0.09	0	1.15	0.18	0.53	0	0	0	0	0	0.41	0	0.11	0	0.39	0.16	0.24	0	0	0.09	0	0
cis_mRNA_up10k	4650	NA	LTCONS_00006111	NM_061643.2	NC_003280.10	1697554	1698041	396	+	NC_003280.10	1691557	1692905	1248	-	*	0.6243	0.8418	0.47	0	0.09	0	1.15	0.18	0.53	0	0	0	0	0	2.83	0.09	0.96	0.02	1.31	0.89	0.89	0.02	0.04	0.46	0	0.02
cis_mRNA_up10k	6478	NA	LTCONS_00006111	NM_061642.4	NC_003280.10	1697554	1698041	396	+	NC_003280.10	1689739	1691077	1236	-	*	0.6908	0.87	0.47	0	0.09	0	1.15	0.18	0.53	0	0	0	0	0	1.74	0	0.65	0.02	0.9	0.46	0.96	0	0.02	0.29	0	0.02
cis_mRNA_up10k	8383	NA	LTCONS_00006111	NM_061641.1	NC_003280.10	1697554	1698041	396	+	NC_003280.10	1688235	1689172	888	-	*	0.657	0.8574	0.47	0	0.09	0	1.15	0.18	0.53	0	0	0	0	0	0.81	0	0.8	0	0.59	0.18	0.7	0	0	0.13	0	0
cis_mRNA_up10k	8975	NA	LTCONS_00006111	NM_001047315.2	NC_003280.10	1697554	1698041	396	+	NC_003280.10	1707015	1707532	474	+	*	0.6847	0.9023	0.47	0	0.09	0	1.15	0.18	0.53	0	0	0	0	0	0.43	0	0	0	0.21	0.2	0.2	0	0	0	0	0
cis_mRNA_up10k	9765	NA	LTCONS_00006111	NM_061640.2	NC_003280.10	1697554	1698041	396	+	NC_003280.10	1686834	1687790	909	-	*	0.8302	0.8811	0.47	0	0.09	0	1.15	0.18	0.53	0	0	0	0	0	3.49	0.03	1.95	0	3.12	0.71	2.32	0	0.06	0.54	0	0
cis_mRNA_up10k	1172	NA	LTCONS_00006129	MTCONS_00006131	NC_003280.10	1755789	1756162	374	+	NC_003280.10	1757333	1766555	7987	+	*	0.7852	0.6667	0	0	0	0	1.15	0.1	0.58	0	0	0	0	0	0.97	0	0.67	0.02	1.57	0.1	1.97	0.02	0.01	0.06	0.01	0.02
cis_mRNA_up10k	1172	NA	LTCONS_00006129	NM_061669.3	NC_003280.10	1755789	1756162	374	+	NC_003280.10	1757333	1757761	429	+	*	0.9239	0.6988	0	0	0	0	1.15	0.1	0.58	0	0	0	0	0	0.94	0	0	0	2.33	0	1.66	0	0	0	0	0
cis_mRNA_dw20k	11596	NA	LTCONS_00006151	NM_061674.5	NC_003280.10	1786441	1786997	557	+	NC_003280.10	1771654	1774846	2466	+	*	-0.6322	-0.8153	0.17	0	0.33	0	0.66	0.05	0.66	0	0	0.06	0	0	3.65	7.93	3.67	8.2	3.14	3.06	3.43	6.19	8.79	3.87	10.09	10.65
cis_mRNA_dw20k	18715	NA	LTCONS_00006151	NM_001322717.1	NC_003280.10	1786441	1786997	557	+	NC_003280.10	1805711	1806025	315	-	*	0.7985	0.7363	0.17	0	0.33	0	0.66	0.05	0.66	0	0	0.06	0	0	0.14	0	0	0	0.13	0	0.38	0	0	0	0	0
cis_mRNA_dw20k	19887	NA	LTCONS_00006151	MTCONS_00006131	NC_003280.10	1786441	1786997	557	+	NC_003280.10	1757333	1766555	7987	+	*	0.9618	0.9281	0.17	0	0.33	0	0.66	0.05	0.66	0	0	0.06	0	0	0.97	0	0.67	0.02	1.57	0.1	1.97	0.02	0.01	0.06	0.01	0.02
cis_mRNA_dw20k	287	NA	LTCONS_00006151	NM_061677.6	NC_003280.10	1786441	1786997	557	+	NC_003280.10	1787283	1788105	762	-	*	0.7703	0.8984	0.17	0	0.33	0	0.66	0.05	0.66	0	0	0.06	0	0	12.23	0	5.55	0.03	10.95	5.05	8.85	0	0	3.77	0	0.04
cis_mRNA_dw20k	7258	NA	LTCONS_00006151	MTCONS_00006148	NC_003280.10	1786441	1786997	557	+	NC_003280.10	1775547	1779184	3173	+	*	-0.7265	-0.8901	0.17	0	0.33	0	0.66	0.05	0.66	0	0	0.06	0	0	1.65	3.65	1.95	3.52	1.18	1.92	1.08	2.34	3.95	1.7	4.38	3.37
cis_mRNA_up10k	177	NA	LTCONS_00006151	NM_182227.5	NC_003280.10	1786441	1786997	557	+	NC_003280.10	1785330	1786265	867	-	*	0.9269	0.9365	0.17	0	0.33	0	0.66	0.05	0.66	0	0	0.06	0	0	20.9	0	16.1	0.03	27.6	3.42	24.6	0.03	0.06	2.67	0.03	0.03
cis_mRNA_up10k	2000	NA	LTCONS_00006151	NM_001026766.3	NC_003280.10	1786441	1786997	557	+	NC_003280.10	1783540	1784442	840	-	*	0.9376	0.9382	0.17	0	0.33	0	0.66	0.05	0.66	0	0	0.06	0	0	1.43	0	1.05	0.03	2.16	0.13	1.76	0	0.03	0.1	0	0
cis_mRNA_up10k	2185	NA	LTCONS_00006151	NM_061678.1	NC_003280.10	1786441	1786997	557	+	NC_003280.10	1789181	1790189	957	+	*	0.8119	0.9621	0.17	0	0.33	0	0.66	0.05	0.66	0	0	0.06	0	0	1.11	0	0.56	0	1.14	0.31	0.78	0	0	0.21	0	0
cis_mRNA_up10k	4135	NA	LTCONS_00006151	NM_001047270.2	NC_003280.10	1786441	1786997	557	+	NC_003280.10	1778901	1782307	2502	-	*	-0.6587	-0.8564	0.17	0	0.33	0	0.66	0.05	0.66	0	0	0.06	0	0	1.13	6.06	1.05	6.67	0.64	1.71	1.15	4.13	5.93	0.84	7.93	7.36
cis_mRNA_dw20k	12369	NA	LTCONS_00006152	NM_061674.5	NC_003280.10	1787214	1788089	876	+	NC_003280.10	1771654	1774846	2466	+	*	-0.6298	-0.6324	0.48	0	0.25	0	0.6	0	0.47	0	0	0	0	0	3.65	7.93	3.67	8.2	3.14	3.06	3.43	6.19	8.79	3.87	10.09	10.65
cis_mRNA_dw20k	17623	NA	LTCONS_00006152	NM_001322717.1	NC_003280.10	1787214	1788089	876	+	NC_003280.10	1805711	1806025	315	-	*	0.763	0.8628	0.48	0	0.25	0	0.6	0	0.47	0	0	0	0	0	0.14	0	0	0	0.13	0	0.38	0	0	0	0	0
cis_mRNA_dw20k	19319	NA	LTCONS_00006152	NM_061680.4	NC_003280.10	1787214	1788089	876	+	NC_003280.10	1807407	1808294	834	-	*	0.8334	0.8281	0.48	0	0.25	0	0.6	0	0.47	0	0	0	0	0	0.17	0.15	0.17	0.09	1.17	0.1	0.92	0	0	0.03	0.06	0.03
cis_mRNA_dw20k	8031	NA	LTCONS_00006152	MTCONS_00006148	NC_003280.10	1787214	1788089	876	+	NC_003280.10	1775547	1779184	3173	+	*	-0.7125	-0.7406	0.48	0	0.25	0	0.6	0	0.47	0	0	0	0	0	1.65	3.65	1.95	3.52	1.18	1.92	1.08	2.34	3.95	1.7	4.38	3.37
cis_mRNA_overlap	0	Lnc-AntiOverlap-mRNA	LTCONS_00006152	NM_061677.6	NC_003280.10	1787214	1788089	876	+	NC_003280.10	1787283	1788105	762	-	-1432.86	0.9183	0.847	0.48	0	0.25	0	0.6	0	0.47	0	0	0	0	0	12.23	0	5.55	0.03	10.95	5.05	8.85	0	0	3.77	0	0.04
cis_mRNA_up10k	1093	NA	LTCONS_00006152	NM_061678.1	NC_003280.10	1787214	1788089	876	+	NC_003280.10	1789181	1790189	957	+	*	0.9634	0.8971	0.48	0	0.25	0	0.6	0	0.47	0	0	0	0	0	1.11	0	0.56	0	1.14	0.31	0.78	0	0	0.21	0	0
cis_mRNA_up10k	2773	NA	LTCONS_00006152	NM_001026766.3	NC_003280.10	1787214	1788089	876	+	NC_003280.10	1783540	1784442	840	-	*	0.9915	0.8486	0.48	0	0.25	0	0.6	0	0.47	0	0	0	0	0	1.43	0	1.05	0.03	2.16	0.13	1.76	0	0.03	0.1	0	0
cis_mRNA_up10k	4908	NA	LTCONS_00006152	NM_001047270.2	NC_003280.10	1787214	1788089	876	+	NC_003280.10	1778901	1782307	2502	-	*	-0.6639	-0.6782	0.48	0	0.25	0	0.6	0	0.47	0	0	0	0	0	1.13	6.06	1.05	6.67	0.64	1.71	1.15	4.13	5.93	0.84	7.93	7.36
cis_mRNA_up10k	950	NA	LTCONS_00006152	NM_182227.5	NC_003280.10	1787214	1788089	876	+	NC_003280.10	1785330	1786265	867	-	*	0.986	0.847	0.48	0	0.25	0	0.6	0	0.47	0	0	0	0	0	20.9	0	16.1	0.03	27.6	3.42	24.6	0.03	0.06	2.67	0.03	0.03
tran	60338	NA	LTCONS_00006152	NM_001322715.1	NC_003280.10	1787214	1788089	876	+	NC_003280.10	1726141	1726877	675	+	-654.11	0.7924	0.7994	0.48	0	0.25	0	0.6	0	0.47	0	0	0	0	0	0.53	0	0.43	0	1.08	0.51	0.26	0	0	0.14	0	0
cis_mRNA_up10k	6267	NA	LTCONS_00006176	NM_061716.1	NC_003280.10	1895578	1896015	396	+	NC_003280.10	1902281	1904446	1323	+	*	-0.6062	-0.6306	0.19	0.32	0.27	0.61	0	1.14	0.44	0.45	0.74	0.82	0.32	0.69	0.02	0.04	0.04	0.02	0.12	0.02	0.02	0.02	0	0	0	0
cis_mRNA_up10k	9100	NA	LTCONS_00006176	NM_061709.1	NC_003280.10	1895578	1896015	396	+	NC_003280.10	1885439	1886479	825	-	*	-0.6444	-0.7395	0.19	0.32	0.27	0.61	0	1.14	0.44	0.45	0.74	0.82	0.32	0.69	0.07	0	0.1	0	0.07	0	0.03	0	0	0	0	0
cis_mRNA_dw20k	8251	NA	LTCONS_00006192	NM_061742.1	NC_003280.10	1961429	1970995	1796	+	NC_003280.10	1979245	1984118	4401	-	*	0.9472	0.8321	6.35	1.22	4.57	1.03	18.58	0.61	13.75	2.07	1.3	0.97	1.24	0.88	0.09	0	0.12	0	0.58	0	0.21	0	0	0	0	0
cis_mRNA_overlap	0	Lnc-AntiOverlap-mRNA	LTCONS_00006192	NM_061740.1	NC_003280.10	1961429	1970995	1796	+	NC_003280.10	1963063	1967936	4401	-	*	0.9472	0.8321	6.35	1.22	4.57	1.03	18.58	0.61	13.75	2.07	1.3	0.97	1.24	0.88	0.09	0	0.12	0	0.58	0	0.21	0	0	0	0	0
cis_mRNA_dw20k	9010	NA	LTCONS_00006204	NM_061748.1	NC_003280.10	2017259	2018836	1416	+	NC_003280.10	2003377	2008250	4461	+	*	0.8622	0.617	5.72	5.55	8.08	3.95	12.75	4.53	10.3	5.95	4.83	5.55	5.55	4.1	0.31	0	0.37	0.02	2.71	0.09	0.56	0.02	0.06	0.11	0.02	0.03
cis_mRNA_overlap	0	Lnc-AntiOverlap-mRNA	LTCONS_00006204	MTCONS_00009374	NC_003280.10	2017259	2018836	1416	+	NC_003280.10	2018621	2023951	5147	-	*	0.6834	0.8078	5.72	5.55	8.08	3.95	12.75	4.53	10.3	5.95	4.83	5.55	5.55	4.1	0.88	1.09	0.96	0.48	1.06	0.6	1.14	1	0.55	0.61	0.99	0.6
cis_mRNA_up10k	819	NA	LTCONS_00006204	NM_061752.2	NC_003280.10	2017259	2018836	1416	+	NC_003280.10	2019654	2022441	2115	+	*	0.8477	0.7199	5.72	5.55	8.08	3.95	12.75	4.53	10.3	5.95	4.83	5.55	5.55	4.1	0.09	0.07	0.33	0.05	0.33	0.14	0.21	0.07	0.04	0.09	0.11	0.04
cis_mRNA_dw20k	10593	NA	LTCONS_00006229	NM_061808.3	NC_003280.10	2173680	2176624	2945	+	NC_003280.10	2187216	2189457	666	-	*	-0.8294	-0.7203	0.23	0.45	0.16	0.54	0.28	0.13	0.24	0.35	0.6	0.07	0.62	0.66	18.85	10.11	16.15	10.85	16.43	23.91	20.4	9.61	10.74	19.97	9.67	11.77
cis_mRNA_dw20k	16259	NA	LTCONS_00006229	MTCONS_00009432	NC_003280.10	2173680	2176624	2945	+	NC_003280.10	2192882	2204112	1944	-	*	-0.8832	-0.8336	0.23	0.45	0.16	0.54	0.28	0.13	0.24	0.35	0.6	0.07	0.62	0.66	30.34	17.73	27.96	15.83	23.82	27.94	23.74	15.83	15.95	27.01	16.63	15.55
cis_mRNA_dw20k	18630	NA	LTCONS_00006229	NM_061800.3	NC_003280.10	2173680	2176624	2945	+	NC_003280.10	2154012	2155051	822	+	*	0.9736	0.9441	0.23	0.45	0.16	0.54	0.28	0.13	0.24	0.35	0.6	0.07	0.62	0.66	0.93	1.98	0.85	2.2	0.87	0.39	0.78	1.87	3	0.28	2.52	2.9
cis_mRNA_dw20k	5895	NA	LTCONS_00006229	NM_061807.5	NC_003280.10	2173680	2176624	2945	+	NC_003280.10	2182518	2186421	1551	-	*	-0.7405	-0.9161	0.23	0.45	0.16	0.54	0.28	0.13	0.24	0.35	0.6	0.07	0.62	0.66	4.05	1.16	12.22	0.41	3.51	30.52	4.55	1.49	0.38	33.31	1.45	0.46
cis_mRNA_dw20k	866	NA	LTCONS_00006229	MTCONS_00006226	NC_003280.10	2173680	2176624	2945	+	NC_003280.10	2153670	2172815	3688	+	*	0.8712	0.9136	0.23	0.45	0.16	0.54	0.28	0.13	0.24	0.35	0.6	0.07	0.62	0.66	0	0.06	0	0.1	0.08	0.01	0.03	0.07	0.09	0	0.09	0.19
cis_mRNA_dw20k	866	NA	LTCONS_00006229	MTCONS_00006227	NC_003280.10	2173680	2176624	2945	+	NC_003280.10	2153670	2172815	18857	+	*	0.9623	0.965	0.23	0.45	0.16	0.54	0.28	0.13	0.24	0.35	0.6	0.07	0.62	0.66	0.56	0.83	0.29	1.41	0.63	0.26	0.68	1.08	1.65	0.11	1.32	1.84
cis_mRNA_overlap	0	mRNA-AntiCompleteIn-LncExon	LTCONS_00006229	MTCONS_00009427	NC_003280.10	2173680	2176624	2945	+	NC_003280.10	2174613	2175475	501	-	-876.99	0.8338	0.8462	0.23	0.45	0.16	0.54	0.28	0.13	0.24	0.35	0.6	0.07	0.62	0.66	0.79	23.12	0.32	14.22	0.25	0.13	0.7	11.93	12.32	0.07	20.41	13.98
cis_mRNA_up10k	4170	NA	LTCONS_00006229	NM_001267120.1	NC_003280.10	2173680	2176624	2945	+	NC_003280.10	2169062	2169511	357	-	*	0.6027	0.6869	0.23	0.45	0.16	0.54	0.28	0.13	0.24	0.35	0.6	0.07	0.62	0.66	0.33	2.32	0	0.89	0	0.1	0	0.95	0.67	0	1.5	0.51
cis_mRNA_up10k	7220	NA	LTCONS_00006229	NM_061802.4	NC_003280.10	2173680	2176624	2945	+	NC_003280.10	2165490	2166461	471	-	*	0.8441	0.8406	0.23	0.45	0.16	0.54	0.28	0.13	0.24	0.35	0.6	0.07	0.62	0.66	0.93	17.75	0.62	11.78	1.11	0.2	0.62	14.23	12.4	0.36	18.44	12.27
cis_mRNA_up10k	9849	NA	LTCONS_00006229	NM_001026839.2	NC_003280.10	2173680	2176624	2945	+	NC_003280.10	2163341	2163832	492	-	*	0.6259	0.7622	0.23	0.45	0.16	0.54	0.28	0.13	0.24	0.35	0.6	0.07	0.62	0.66	0.14	1.51	0	0.57	0.2	0.09	0.32	0.77	0.6	0.27	0.83	0.62
cis_mRNA_dw20k	1460	NA	LTCONS_00006241	NM_001027073.1	NC_003280.10	2282039	2282273	235	+	NC_003280.10	2280139	2280580	393	+	*	0.9157	0.8956	0.24	0.19	0	0	0.84	0	0.88	0	0	0	0	0	0.09	0	0	0	0.36	0	0.18	0	0	0	0	0
cis_mRNA_dw20k	8645	NA	LTCONS_00006241	NM_061826.1	NC_003280.10	2282039	2282273	235	+	NC_003280.10	2290917	2292127	900	-	*	-0.7657	-0.8296	0.24	0.19	0	0	0.84	0	0.88	0	0	0	0	0	0	4.41	10.89	5.32	0	5.14	0	5.25	5.37	5.5	5.29	5.68
cis_mRNA_up10k	7525	NA	LTCONS_00006241	NM_001306560.1	NC_003280.10	2282039	2282273	235	+	NC_003280.10	2289797	2290243	393	+	*	0.9428	0.6449	0.24	0.19	0	0	0.84	0	0.88	0	0	0	0	0	31.95	0.88	27.71	0.31	138.87	2.57	96.61	0.23	0.91	5.65	0.73	1.13
cis_mRNA_dw20k	12242	NA	LTCONS_00006243	NM_061833.1	NC_003280.10	2297747	2299249	1503	+	NC_003280.10	2311490	2312847	879	-	*	0.643	0.6577	0.34	0.03	0.29	0.03	1.33	0.05	0.96	0	0.02	0	0.02	0	0.03	0	0.75	0	0.5	0.03	0.34	0	0	0.1	0	0
cis_mRNA_dw20k	17168	NA	LTCONS_00006243	NM_001027073.1	NC_003280.10	2297747	2299249	1503	+	NC_003280.10	2280139	2280580	393	+	*	0.969	0.77	0.34	0.03	0.29	0.03	1.33	0.05	0.96	0	0.02	0	0.02	0	0.09	0	0	0	0.36	0	0.18	0	0	0	0	0
cis_mRNA_dw20k	694	NA	LTCONS_00006243	NM_061829.3	NC_003280.10	2297747	2299249	1503	+	NC_003280.10	2299942	2300818	624	-	*	0.6523	0.6926	0.34	0.03	0.29	0.03	1.33	0.05	0.96	0	0.02	0	0.02	0	14.86	0.51	8.7	0.71	10.27	6.84	9.94	0.58	0.87	5.34	0.26	0.9
cis_mRNA_dw20k	7505	NA	LTCONS_00006243	NM_001306560.1	NC_003280.10	2297747	2299249	1503	+	NC_003280.10	2289797	2290243	393	+	*	0.9984	0.7068	0.34	0.03	0.29	0.03	1.33	0.05	0.96	0	0.02	0	0.02	0	31.95	0.88	27.71	0.31	138.87	2.57	96.61	0.23	0.91	5.65	0.73	1.13
cis_mRNA_up10k	1645	NA	LTCONS_00006243	NM_061827.1	NC_003280.10	2297747	2299249	1503	+	NC_003280.10	2294693	2296103	1218	-	*	0.7505	0.7237	0.34	0.03	0.29	0.03	1.33	0.05	0.96	0	0.02	0	0.02	0	3.64	0	1.8	0.06	2.95	1.42	2.63	0.02	0.06	0.81	0	0.06
cis_mRNA_up10k	5521	NA	LTCONS_00006243	MTCONS_00009442	NC_003280.10	2297747	2299249	1503	+	NC_003280.10	2271760	2292227	18848	-	*	0.9912	0.6714	0.34	0.03	0.29	0.03	1.33	0.05	0.96	0	0.02	0	0.02	0	7.25	3.64	7.37	3.68	19.9	3.03	17.16	3.21	4.21	2.67	4.45	4.48
cis_mRNA_up10k	5621	NA	LTCONS_00006243	NM_061826.1	NC_003280.10	2297747	2299249	1503	+	NC_003280.10	2290917	2292127	900	-	*	-0.6393	-0.6335	0.34	0.03	0.29	0.03	1.33	0.05	0.96	0	0.02	0	0.02	0	0	4.41	10.89	5.32	0	5.14	0	5.25	5.37	5.5	5.29	5.68
cis_mRNA_up10k	9216	NA	LTCONS_00006243	NM_170977.4	NC_003280.10	2297747	2299249	1503	+	NC_003280.10	2287333	2288532	1152	-	*	0.9978	0.7068	0.34	0.03	0.29	0.03	1.33	0.05	0.96	0	0.02	0	0.02	0	19.56	2.72	20.16	3.43	70.77	3.19	51.02	1.97	2.37	5.41	3.11	3.23
cis_mRNA_dw20k	3725	NA	LTCONS_00006291	NM_061900.3	NC_003280.10	2593363	2594274	912	+	NC_003280.10	2587504	2589639	984	+	*	0.9824	0.8783	4.65	0.6	2.83	1.06	13.81	0.51	9.75	0.36	1	1.23	0.26	1.02	0.88	0.02	0.96	0.02	5.56	0.14	2.95	0	0	0.23	0	0.03
cis_mRNA_overlap	0	Lnc-AntiOverlap-mRNA	LTCONS_00006291	NM_061901.3	NC_003280.10	2593363	2594274	912	+	NC_003280.10	2594052	2598560	4083	-	*	0.968	0.8713	4.65	0.6	2.83	1.06	13.81	0.51	9.75	0.36	1	1.23	0.26	1.02	0.2	0	0.15	0.07	0.84	0.02	0.36	0	0	0.06	0.04	0.04
cis_mRNA_up10k	6280	NA	LTCONS_00006291	NM_061902.1	NC_003280.10	2593363	2594274	912	+	NC_003280.10	2600553	2601779	888	+	*	0.9875	0.9592	4.65	0.6	2.83	1.06	13.81	0.51	9.75	0.36	1	1.23	0.26	1.02	0.19	0	0.18	0.05	0.97	0	0.73	0	0.06	0.16	0	0.06
cis_mRNA_up10k	7771	NA	LTCONS_00006291	NM_061899.1	NC_003280.10	2593363	2594274	912	+	NC_003280.10	2583782	2585593	954	-	*	0.8433	0.8254	4.65	0.6	2.83	1.06	13.81	0.51	9.75	0.36	1	1.23	0.26	1.02	0.29	0	0.65	0.05	0.86	0.08	1.18	0	0	0.45	0.05	0.11
tran	1737045	NA	LTCONS_00006291	MTCONS_00009139	NC_003280.10	2593363	2594274	912	+	NC_003280.10	851428	856319	4527	-	-859.98	0.9598	0.8302	4.65	0.6	2.83	1.06	13.81	0.51	9.75	0.36	1	1.23	0.26	1.02	0.12	0	0.12	0	0.98	0.02	0.4	0	0	0.05	0	0
cis_mRNA_dw20k	11807	NA	LTCONS_00006331	MTCONS_00006326	NC_003280.10	2775283	2777511	728	+	NC_003280.10	2758735	2763477	2542	+	*	0.6889	0.8861	0.8	0	1.45	0	0.43	0.04	0.82	0	0	0.21	0	0	1.31	0.05	0.52	0.02	0.38	0.4	0.64	0.1	0.06	0.35	0.04	0.05
cis_mRNA_dw20k	13428	NA	LTCONS_00006331	NM_061952.2	NC_003280.10	2775283	2777511	728	+	NC_003280.10	2758625	2761856	924	+	*	0.8145	0.9203	0.8	0	1.45	0	0.43	0.04	0.82	0	0	0.21	0	0	0.09	0	0.55	0	0.16	0.23	0.61	0	0	0.14	0	0
cis_mRNA_up10k	280	NA	LTCONS_00006331	NM_061959.3	NC_003280.10	2775283	2777511	728	+	NC_003280.10	2773996	2775004	954	-	*	0.8199	0.8758	0.8	0	1.45	0	0.43	0.04	0.82	0	0	0.21	0	0	1.34	0.03	0.85	0.03	0.89	0.31	0.87	0.07	0.05	0.33	0.03	0.08
cis_mRNA_up10k	3044	NA	LTCONS_00006331	NM_061957.4	NC_003280.10	2775283	2777511	728	+	NC_003280.10	2771174	2772240	1023	-	*	0.7416	0.9156	0.8	0	1.45	0	0.43	0.04	0.82	0	0	0.21	0	0	1.77	0	0.84	0	0.77	0.67	1.22	0.14	0	0.17	0.07	0
cis_mRNA_up10k	4160	NA	LTCONS_00006331	NM_061963.6	NC_003280.10	2775283	2777511	728	+	NC_003280.10	2781670	2783033	654	+	*	-0.6638	-0.8472	0.8	0	1.45	0	0.43	0.04	0.82	0	0	0.21	0	0	1.33	6.46	0.58	6.02	0.36	0.93	0.84	8.97	6.3	0.94	8.46	5.32
cis_mRNA_up10k	4396	NA	LTCONS_00006331	NM_061956.1	NC_003280.10	2775283	2777511	728	+	NC_003280.10	2769794	2770888	999	-	*	0.6098	0.8397	0.8	0	1.45	0	0.43	0.04	0.82	0	0	0.21	0	0	1.25	0	0.43	0.05	0.82	0.45	0.48	0	0	0.25	0	0.03
cis_mRNA_up10k	6167	NA	LTCONS_00006331	NM_061955.1	NC_003280.10	2775283	2777511	728	+	NC_003280.10	2767270	2769117	1011	-	*	-0.6095	-0.795	0.8	0	1.45	0	0.43	0.04	0.82	0	0	0.21	0	0	5.88	6.44	3.15	9.5	4.56	3.2	4.93	8.45	9.83	3.94	9.14	9.31
cis_mRNA_up10k	636	NA	LTCONS_00006331	NM_001306599.1	NC_003280.10	2775283	2777511	728	+	NC_003280.10	2778146	2779282	780	+	-348.75	0.8687	0.9741	0.8	0	1.45	0	0.43	0.04	0.82	0	0	0.21	0	0	0.58	0	0.43	0	0.15	0.04	0.21	0	0	0.04	0	0
cis_mRNA_dw20k	10267	NA	LTCONS_00006377	MTCONS_00006374	NC_003280.10	3027927	3028766	840	+	NC_003280.10	3014816	3017661	1380	+	*	0.6245	0.718	0.13	0.38	0.23	0.55	0.07	0.16	0.23	0.17	0.27	0.1	0.18	0.41	0.31	1.1	0.35	1.54	0.19	0	0.63	1.71	1.61	0.3	1.53	2.15
cis_mRNA_dw20k	12218	NA	LTCONS_00006377	NM_062029.2	NC_003280.10	3027927	3028766	840	+	NC_003280.10	3040983	3043406	1884	-	*	0.6898	0.6174	0.13	0.38	0.23	0.55	0.07	0.16	0.23	0.17	0.27	0.1	0.18	0.41	0	1.12	0	1.04	0.38	0	0	0.19	0.4	0	0.72	0.42
cis_mRNA_up10k	4019	NA	LTCONS_00006377	NM_062027.4	NC_003280.10	3027927	3028766	840	+	NC_003280.10	3032784	3035908	1758	+	*	0.7208	0.662	0.13	0.38	0.23	0.55	0.07	0.16	0.23	0.17	0.27	0.1	0.18	0.41	7.41	18.44	8.79	26.32	9.47	8.39	8.64	13.51	23.95	14.68	21.76	25.02
cis_mRNA_dw20k	19912	NA	LTCONS_00006440	MTCONS_00006434	NC_003280.10	3340576	3344389	1096	+	NC_003280.10	3318196	3320665	1656	+	*	-0.6394	-0.6014	1.19	0.78	1.21	0.41	1.57	1.05	1.39	0.83	0.44	1.4	0.98	0.39	1.25	2.62	2.12	6.88	1.9	3.1	2.65	4.01	4.78	5.64	3.33	5.68
cis_mRNA_dw20k	2432	NA	LTCONS_00006440	MTCONS_00009671	NC_003280.10	3340576	3344389	1096	+	NC_003280.10	3346820	3350202	2253	-	*	0.8018	0.8112	1.19	0.78	1.21	0.41	1.57	1.05	1.39	0.83	0.44	1.4	0.98	0.39	5.55	5.24	5.4	3.11	5.84	6.53	6.16	3.39	3.42	7.86	5.07	4.23
cis_mRNA_dw20k	2432	NA	LTCONS_00006440	NM_001026912.1	NC_003280.10	3340576	3344389	1096	+	NC_003280.10	3346820	3347515	543	-	*	0.8157	0.8112	1.19	0.78	1.21	0.41	1.57	1.05	1.39	0.83	0.44	1.4	0.98	0.39	1.8	0.56	2.62	2.03	4.44	2.7	3.59	1.27	0.51	4.56	3.19	1.04
cis_mRNA_dw20k	8771	NA	LTCONS_00006440	NM_062107.3	NC_003280.10	3340576	3344389	1096	+	NC_003280.10	3329786	3331806	1317	+	*	0.8596	0.838	1.19	0.78	1.21	0.41	1.57	1.05	1.39	0.83	0.44	1.4	0.98	0.39	0.22	0.02	0.18	0	0.38	0.17	0.33	0.03	0.02	0.19	0.02	0.06
cis_mRNA_dw20k	901	NA	LTCONS_00006440	NM_062111.4	NC_003280.10	3340576	3344389	1096	+	NC_003280.10	3345289	3346371	945	-	*	0.7804	0.7133	1.19	0.78	1.21	0.41	1.57	1.05	1.39	0.83	0.44	1.4	0.98	0.39	50.38	21.98	72.65	23.04	53.9	66.55	63.92	23.06	23.97	67.5	23.1	26.8
cis_mRNA_overlap	0	Lnc-AntiOverlap-mRNA	LTCONS_00006440	NM_001129133.2	NC_003280.10	3340576	3344389	1096	+	NC_003280.10	3343786	3344934	930	-	-996.77	0.7634	0.7483	1.19	0.78	1.21	0.41	1.57	1.05	1.39	0.83	0.44	1.4	0.98	0.39	40.24	19.29	51.47	16.26	39.11	55.6	39.21	15.89	18.27	50.82	19.79	15.76
cis_mRNA_overlap	0	Lnc-AntiOverlap-mRNA	LTCONS_00006440	NM_062110.2	NC_003280.10	3340576	3344389	1096	+	NC_003280.10	3341379	3342071	588	-	*	0.7499	0.7622	1.19	0.78	1.21	0.41	1.57	1.05	1.39	0.83	0.44	1.4	0.98	0.39	13.22	4.68	20.59	3.06	11.75	18.6	15.34	3.1	4.29	17.24	4.91	4.2
cis_mRNA_overlap	0	mRNA-AntiCompleteIn-LncIntron	LTCONS_00006440	NM_001026913.1	NC_003280.10	3340576	3344389	1096	+	NC_003280.10	3342393	3343537	900	-	*	0.765	0.6364	1.19	0.78	1.21	0.41	1.57	1.05	1.39	0.83	0.44	1.4	0.98	0.39	27.36	7.26	31.53	7.74	23.11	31.44	28	7.3	8.67	28.54	7.85	10.18
cis_mRNA_up10k	1921	NA	LTCONS_00006440	NM_062108.2	NC_003280.10	3340576	3344389	1096	+	NC_003280.10	3338002	3338656	462	-	*	-0.773	-0.6823	1.19	0.78	1.21	0.41	1.57	1.05	1.39	0.83	0.44	1.4	0.98	0.39	0.44	0	0	0.8	0	0	0	0	0.91	0	0	1.09
cis_mRNA_up10k	3461	NA	LTCONS_00006440	NM_001267144.1	NC_003280.10	3340576	3344389	1096	+	NC_003280.10	3335691	3337116	1011	-	*	-0.6961	-0.6014	1.19	0.78	1.21	0.41	1.57	1.05	1.39	0.83	0.44	1.4	0.98	0.39	1.2	1.38	0.74	2.59	1.13	0.94	1.08	0.75	1.85	1.01	2.12	2.03
cis_mRNA_up10k	5871	NA	LTCONS_00006440	NM_001026914.2	NC_003280.10	3340576	3344389	1096	+	NC_003280.10	3350259	3358910	945	+	*	0.7944	0.7622	1.19	0.78	1.21	0.41	1.57	1.05	1.39	0.83	0.44	1.4	0.98	0.39	34.93	13.12	46.22	13.08	35.94	47.14	37.17	14.04	11.74	45.01	12.75	12.01
cis_mRNA_dw20k	7487	NA	LTCONS_00006481	NM_062159.2	NC_003280.10	3499977	3500800	824	+	NC_003280.10	3491179	3492491	540	+	*	-0.6243	-0.7158	0.2	0.91	0.37	0.98	0.17	0.13	0.1	0.09	0.59	0.18	0.49	0.41	0.65	0.05	0.23	0	0.17	0.23	0.4	0.15	0	0.24	0.1	0.11
cis_mRNA_dw20k	9901	NA	LTCONS_00006481	NM_062158.4	NC_003280.10	3499977	3500800	824	+	NC_003280.10	3482513	3490077	1644	+	*	-0.6525	-0.6014	0.2	0.91	0.37	0.98	0.17	0.13	0.1	0.09	0.59	0.18	0.49	0.41	62.01	26.57	63.18	27.6	54.77	69.59	56.21	29.63	29.28	61.44	26.31	26.62
cis_mRNA_overlap	0	Lnc-AntiOverlap-mRNA	LTCONS_00006481	NM_062161.4	NC_003280.10	3499977	3500800	824	+	NC_003280.10	3500147	3502444	1116	-	-1539.5	0.8566	0.8042	0.2	0.91	0.37	0.98	0.17	0.13	0.1	0.09	0.59	0.18	0.49	0.41	36.35	897.96	20.06	922.02	3.31	8.1	2.9	105.94	931.5	7.66	859.79	778.85
cis_mRNA_up10k	4220	NA	LTCONS_00006481	MTCONS_00006484	NC_003280.10	3499977	3500800	824	+	NC_003280.10	3505019	3509449	1014	+	*	-0.657	-0.6364	0.2	0.91	0.37	0.98	0.17	0.13	0.1	0.09	0.59	0.18	0.49	0.41	43.26	20.69	47.64	21.09	33.77	55.95	41.01	26.72	22.56	49.93	22.8	20.63
cis_mRNA_up10k	1217	NA	LTCONS_00006522	NM_062201.4	NC_003280.10	3639544	3640284	460	+	NC_003280.10	3641500	3643879	1209	+	*	0.9212	0.8414	0.22	0	0.14	0	1.5	0	0.14	0	0	0.07	0	0	0.13	0	0.11	0.06	0.44	0.02	0.21	0	0	0.02	0	0.02
cis_mRNA_dw20k	2004	NA	LTCONS_00006535	NM_001026980.3	NC_003280.10	3685310	3685843	416	+	NC_003280.10	3687846	3688691	744	-	*	0.8824	0.7502	1.91	1.4	7.87	3.14	8.8	1.95	7.01	1.53	2.81	4.01	1.64	2.94	0.58	0	4.46	0	8.5	0.41	1.97	0	0	1.24	0	0
cis_mRNA_dw20k	865	NA	LTCONS_00006535	NM_062213.3	NC_003280.10	3685310	3685843	416	+	NC_003280.10	3683190	3684446	807	+	*	0.6801	0.6795	1.91	1.4	7.87	3.14	8.8	1.95	7.01	1.53	2.81	4.01	1.64	2.94	25.41	3.38	18.79	5.07	28.58	16.2	25.24	4.99	3.75	17.5	3.38	3.93
cis_mRNA_dw20k	10593	NA	LTCONS_00006568	NM_062260.4	NC_003280.10	3809052	3809630	579	+	NC_003280.10	3820222	3821281	795	-	*	0.9751	0.9021	8.17	0.37	8.49	0.5	8.83	12.2	8.22	0.54	0.82	11.8	0.48	1	24.27	4.98	20.12	8.45	20.11	31.84	22.7	10.89	9.06	30.82	5.54	8.54
cis_mRNA_up10k	5734	NA	LTCONS_00006568	NM_062254.1	NC_003280.10	3809052	3809630	579	+	NC_003280.10	3802977	3803319	297	-	*	-0.7795	-0.7831	8.17	0.37	8.49	0.5	8.83	12.2	8.22	0.54	0.82	11.8	0.48	1	0.15	0.38	0	0.83	0	0	0	0.46	0.52	0	0.13	0.28
cis_mRNA_up10k	883	NA	LTCONS_00006568	NM_062256.4	NC_003280.10	3809052	3809630	579	+	NC_003280.10	3807312	3808170	708	-	*	0.9661	0.9161	8.17	0.37	8.49	0.5	8.83	12.2	8.22	0.54	0.82	11.8	0.48	1	52.6	20.2	53.51	22.68	39.59	68.13	49.73	27.98	25.47	62.83	19.63	23.33
cis_mRNA_dw20k	15694	NA	LTCONS_00006580	NM_062291.1	NC_003280.10	3889029	3889462	387	+	NC_003280.10	3905155	3906620	1278	-	*	0.6609	0.7728	1.17	0.08	0.28	0.08	1.37	0.09	1.66	0	0.08	0.95	0.08	0	0.65	0	0.3	0	0.12	0.42	0.48	0	0	0.41	0	0.02
cis_mRNA_dw20k	6931	NA	LTCONS_00006580	NM_062281.1	NC_003280.10	3889029	3889462	387	+	NC_003280.10	3880245	3882099	1092	+	*	0.9111	0.9516	1.17	0.08	0.28	0.08	1.37	0.09	1.66	0	0.08	0.95	0.08	0	0.05	0	0.02	0	0.05	0.02	0.12	0	0	0.03	0	0
cis_mRNA_up10k	5380	NA	LTCONS_00006580	MTCONS_00006583	NC_003280.10	3889029	3889462	387	+	NC_003280.10	3894841	3896649	1228	+	*	0.85	0.8818	1.17	0.08	0.28	0.08	1.37	0.09	1.66	0	0.08	0.95	0.08	0	0.49	0.13	0.44	0	1.4	0.07	1.2	0.02	0.04	0.07	0.04	0
cis_mRNA_up10k	8700	NA	LTCONS_00006580	NM_062286.3	NC_003280.10	3889029	3889462	387	+	NC_003280.10	3898161	3899566	753	+	*	0.6946	0.8558	1.17	0.08	0.28	0.08	1.37	0.09	1.66	0	0.08	0.95	0.08	0	1.87	0.36	1.86	0.17	9.14	0.35	3.17	0.14	0.07	0.43	0.45	0.11
cis_mRNA_dw20k	181	NA	LTCONS_00006596	MTCONS_00006594	NC_003280.10	3936264	3937537	1173	+	NC_003280.10	3934487	3936084	924	+	*	-0.6625	-0.6643	1.35	3.48	0.76	2.18	0.48	1.38	0.79	2.39	2.67	0.77	4.66	2.6	34.43	17.76	27.74	15.13	24.41	42.84	32.14	18.06	21.7	29.43	14.76	23.43
cis_mRNA_dw20k	376	NA	LTCONS_00006596	NM_062297.4	NC_003280.10	3936264	3937537	1173	+	NC_003280.10	3934487	3935889	753	+	*	-0.8453	-0.7552	1.35	3.48	0.76	2.18	0.48	1.38	0.79	2.39	2.67	0.77	4.66	2.6	51.83	16.62	70.26	13.9	67.69	57.31	58.42	16.51	16.78	62.32	18.28	14.36
cis_mRNA_overlap	0	Lnc-Overlap-mRNA	LTCONS_00006596	MTCONS_00006597	NC_003280.10	3936264	3937537	1173	+	NC_003280.10	3936264	3971544	6008	+	-615.18	0.8441	0.8601	1.35	3.48	0.76	2.18	0.48	1.38	0.79	2.39	2.67	0.77	4.66	2.6	1.33	4.04	0.94	2.79	1.32	1.76	1.31	2.94	2.03	1.93	3.37	2.12
cis_mRNA_up10k	2550	NA	LTCONS_00006596	MTCONS_00009782	NC_003280.10	3936264	3937537	1173	+	NC_003280.10	3919738	3933715	3526	-	*	-0.7346	-0.6853	1.35	3.48	0.76	2.18	0.48	1.38	0.79	2.39	2.67	0.77	4.66	2.6	7.4	4	5.24	3.5	6.28	7.87	9.26	3.44	4.92	5.88	2.64	4.42
cis_mRNA_up10k	2550	NA	LTCONS_00006596	MTCONS_00009787	NC_003280.10	3936264	3937537	1173	+	NC_003280.10	3921719	3933715	3222	-	*	-0.8352	-0.7762	1.35	3.48	0.76	2.18	0.48	1.38	0.79	2.39	2.67	0.77	4.66	2.6	19.44	10.69	22.85	10.74	19.31	24.28	19.98	12.08	11.49	22.43	10.2	12.16
cis_mRNA_up10k	2550	NA	LTCONS_00006596	NM_062296.5	NC_003280.10	3936264	3937537	1173	+	NC_003280.10	3932323	3933715	1245	-	*	-0.7491	-0.7203	1.35	3.48	0.76	2.18	0.48	1.38	0.79	2.39	2.67	0.77	4.66	2.6	80.14	51.09	81.96	45.36	68.91	80.13	67.27	65.97	49.07	82.68	49.45	46.2
cis_mRNA_up10k	8357	NA	LTCONS_00006596	NM_182226.3	NC_003280.10	3936264	3937537	1173	+	NC_003280.10	3921997	3927908	1023	-	*	-0.6049	-0.6935	1.35	3.48	0.76	2.18	0.48	1.38	0.79	2.39	2.67	0.77	4.66	2.6	23.1	15.43	20.62	22.7	29.55	18.63	27.01	17.52	18.63	23.7	21.23	17.16
cis_mRNA_dw20k	2431	NA	LTCONS_00006601	MTCONS_00006594	NC_003280.10	3938514	3939615	1102	+	NC_003280.10	3934487	3936084	924	+	*	-0.7424	-0.7483	0.94	2.84	0.41	1.83	0.49	0.76	0.88	2.08	2.27	1.06	2.86	2.02	34.43	17.76	27.74	15.13	24.41	42.84	32.14	18.06	21.7	29.43	14.76	23.43
cis_mRNA_dw20k	2626	NA	LTCONS_00006601	NM_062297.4	NC_003280.10	3938514	3939615	1102	+	NC_003280.10	3934487	3935889	753	+	*	-0.9197	-0.7133	0.94	2.84	0.41	1.83	0.49	0.76	0.88	2.08	2.27	1.06	2.86	2.02	51.83	16.62	70.26	13.9	67.69	57.31	58.42	16.51	16.78	62.32	18.28	14.36
cis_mRNA_overlap	0	Lnc-CompleteIn-mRNAIntron	LTCONS_00006601	MTCONS_00006597	NC_003280.10	3938514	3939615	1102	+	NC_003280.10	3936264	3971544	6008	+	*	0.9001	0.9091	0.94	2.84	0.41	1.83	0.49	0.76	0.88	2.08	2.27	1.06	2.86	2.02	1.33	4.04	0.94	2.79	1.32	1.76	1.31	2.94	2.03	1.93	3.37	2.12
cis_mRNA_up10k	4800	NA	LTCONS_00006601	MTCONS_00009782	NC_003280.10	3938514	3939615	1102	+	NC_003280.10	3919738	3933715	3526	-	*	-0.746	-0.7552	0.94	2.84	0.41	1.83	0.49	0.76	0.88	2.08	2.27	1.06	2.86	2.02	7.4	4	5.24	3.5	6.28	7.87	9.26	3.44	4.92	5.88	2.64	4.42
cis_mRNA_up10k	4800	NA	LTCONS_00006601	MTCONS_00009787	NC_003280.10	3938514	3939615	1102	+	NC_003280.10	3921719	3933715	3222	-	*	-0.9105	-0.8531	0.94	2.84	0.41	1.83	0.49	0.76	0.88	2.08	2.27	1.06	2.86	2.02	19.44	10.69	22.85	10.74	19.31	24.28	19.98	12.08	11.49	22.43	10.2	12.16
cis_mRNA_up10k	4800	NA	LTCONS_00006601	NM_062296.5	NC_003280.10	3938514	3939615	1102	+	NC_003280.10	3932323	3933715	1245	-	*	-0.8102	-0.6503	0.94	2.84	0.41	1.83	0.49	0.76	0.88	2.08	2.27	1.06	2.86	2.02	80.14	51.09	81.96	45.36	68.91	80.13	67.27	65.97	49.07	82.68	49.45	46.2
cis_mRNA_dw20k	12297	NA	LTCONS_00006602	MTCONS_00006594	NC_003280.10	3948380	3949708	1329	+	NC_003280.10	3934487	3936084	924	+	*	-0.7174	-0.718	0.58	1.06	0.47	0.88	0.32	0.46	0.56	1.02	1	0.47	1.5	1.17	34.43	17.76	27.74	15.13	24.41	42.84	32.14	18.06	21.7	29.43	14.76	23.43
cis_mRNA_dw20k	12492	NA	LTCONS_00006602	NM_062297.4	NC_003280.10	3948380	3949708	1329	+	NC_003280.10	3934487	3935889	753	+	*	-0.895	-0.7566	0.58	1.06	0.47	0.88	0.32	0.46	0.56	1.02	1	0.47	1.5	1.17	51.83	16.62	70.26	13.9	67.69	57.31	58.42	16.51	16.78	62.32	18.28	14.36
cis_mRNA_overlap	0	Lnc-CompleteIn-mRNAIntron	LTCONS_00006602	MTCONS_00006597	NC_003280.10	3948380	3949708	1329	+	NC_003280.10	3936264	3971544	6008	+	*	0.7711	0.7951	0.58	1.06	0.47	0.88	0.32	0.46	0.56	1.02	1	0.47	1.5	1.17	1.33	4.04	0.94	2.79	1.32	1.76	1.31	2.94	2.03	1.93	3.37	2.12
cis_mRNA_dw20k	2827	NA	LTCONS_00006627	NM_001027077.5	NC_003280.10	3990948	3993808	2632	+	NC_003280.10	3987538	3988122	342	+	-163.62	0.6463	0.7132	0.13	0.81	0.01	0.8	0.06	0.17	0.19	0.2	0.86	0.08	0.75	1.7	0	0	0	0.1	0	0	0	0.09	0.1	0	0	0.11
cis_mRNA_dw20k	4482	NA	LTCONS_00006627	NM_062303.4	NC_003280.10	3990948	3993808	2632	+	NC_003280.10	3982654	3986467	714	+	*	0.7545	0.8827	0.13	0.81	0.01	0.8	0.06	0.17	0.19	0.2	0.86	0.08	0.75	1.7	0.08	0.43	0.04	0.21	0	0.12	0.24	0.45	0.41	0.04	0.33	0.5
cis_mRNA_up10k	1452	NA	LTCONS_00006627	NM_001027239.3	NC_003280.10	3990948	3993808	2632	+	NC_003280.10	3988700	3989497	306	-	*	0.6338	0.7257	0.13	0.81	0.01	0.8	0.06	0.17	0.19	0.2	0.86	0.08	0.75	1.7	0	0.12	0	0	0	0	0	0	0.12	0	0.48	0.26
cis_mRNA_dw20k	14412	NA	LTCONS_00006631	NM_062307.1	NC_003280.10	4001632	4002416	785	+	NC_003280.10	4016827	4018701	1170	-	*	-0.6997	-0.8278	0.54	0.06	0.43	0.03	0.43	0.14	0.78	0.09	0.1	0.11	0.1	0.07	0.05	0.46	0.09	0.28	0.07	0.13	0.02	0.12	0.29	0.09	0.37	0.25
cis_mRNA_up10k	3039	NA	LTCONS_00006642	NM_062318.3	NC_003280.10	4066739	4066971	233	+	NC_003280.10	4070009	4072687	1257	+	*	0.6699	0.795	0	0.39	0	0.18	0	0.21	0	0.69	0	0	0	0	0.31	0.45	0	0.92	0	0.17	0	0.63	0	0	0	0.15
cis_mRNA_overlap	0	Lnc-Overlap-mRNA	LTCONS_00006657	NM_062326.4	NC_003280.10	4147544	4149644	1422	+	NC_003280.10	4146344	4149395	1326	+	-426.16	0.9824	0.8811	0.88	8.68	0.13	7.3	0.25	0.3	0.47	0.43	6.94	0.19	7.21	6.28	0.98	16.39	0.46	10.39	0.56	0.22	0.43	0.95	9.27	0.41	12.67	9.24
cis_mRNA_up10k	755	NA	LTCONS_00006659	NM_062332.4	NC_003280.10	4174241	4174626	386	+	NC_003280.10	4171811	4173487	975	-	*	0.8536	0.6609	0.1	0	0.19	0	0.64	0	0	0	0	0	0	0	8	0.62	8.75	1.13	35.35	1.07	20.27	0.51	1.04	2.04	0.81	0.86
cis_mRNA_up10k	3907	NA	LTCONS_00006660	NM_062332.4	NC_003280.10	4177393	4178596	1204	+	NC_003280.10	4171811	4173487	975	-	*	0.9558	0.7356	0.13	0.08	0.24	0.19	0.68	0.15	0.37	0.12	0.1	0.11	0.1	0.2	8	0.62	8.75	1.13	35.35	1.07	20.27	0.51	1.04	2.04	0.81	0.86
cis_mRNA_up10k	8081	NA	LTCONS_00006660	NM_182185.4	NC_003280.10	4177393	4178596	1204	+	NC_003280.10	4186676	4192119	1455	+	*	0.8034	0.8207	0.13	0.08	0.24	0.19	0.68	0.15	0.37	0.12	0.1	0.11	0.1	0.2	0.41	0	0.27	0.69	0.86	0.14	0.77	0	0.09	0.09	0.16	0.2
cis_mRNA_dw20k	11273	NA	LTCONS_00006662	NM_062338.3	NC_003280.10	4182217	4183758	1194	+	NC_003280.10	4195030	4204147	5367	-	*	-0.7222	-0.6832	1.02	0	0.58	0.02	1.15	0.73	1.18	0	0.04	0.28	0	0.02	1.21	2.95	1.75	4.85	1.07	0.71	0.71	1.75	5	0.78	3.4	5.29
cis_mRNA_dw20k	5112	NA	LTCONS_00006662	MTCONS_00009811	NC_003280.10	4182217	4183758	1194	+	NC_003280.10	4188869	4204147	9290	-	*	-0.6588	-0.6561	1.02	0	0.58	0.02	1.15	0.73	1.18	0	0.04	0.28	0	0.02	0.31	0.4	0.13	1.21	0.15	0.34	0.46	0.84	0.61	0.37	0.68	0.81
cis_mRNA_overlap	0	Lnc-Overlap-mRNA	LTCONS_00006662	NM_062334.2	NC_003280.10	4182217	4183758	1194	+	NC_003280.10	4180287	4183489	1275	+	-415.95	0.832	0.7267	1.02	0	0.58	0.02	1.15	0.73	1.18	0	0.04	0.28	0	0.02	3.22	1.06	2.76	1.49	2.98	3.23	3.47	1.59	1.37	3.48	1.78	1.61
cis_mRNA_up10k	2919	NA	LTCONS_00006662	NM_062336.4	NC_003280.10	4182217	4183758	1194	+	NC_003280.10	4186676	4208266	3276	+	*	-0.8426	-0.8536	1.02	0	0.58	0.02	1.15	0.73	1.18	0	0.04	0.28	0	0.02	8.13	27.08	2.75	25.84	5.38	6	6.17	27.88	25.51	6.39	26.9	21.96
cis_mRNA_up10k	2919	NA	LTCONS_00006662	NM_182185.4	NC_003280.10	4182217	4183758	1194	+	NC_003280.10	4186676	4192119	1455	+	*	0.6628	0.6797	1.02	0	0.58	0.02	1.15	0.73	1.18	0	0.04	0.28	0	0.02	0.41	0	0.27	0.69	0.86	0.14	0.77	0	0.09	0.09	0.16	0.2
cis_mRNA_up10k	8731	NA	LTCONS_00006662	NM_062332.4	NC_003280.10	4182217	4183758	1194	+	NC_003280.10	4171811	4173487	975	-	*	0.792	0.9066	1.02	0	0.58	0.02	1.15	0.73	1.18	0	0.04	0.28	0	0.02	8	0.62	8.75	1.13	35.35	1.07	20.27	0.51	1.04	2.04	0.81	0.86
cis_mRNA_dw20k	3987	NA	LTCONS_00006670	NM_062336.4	NC_003280.10	4212252	4213448	844	+	NC_003280.10	4186676	4208266	3276	+	*	-0.9436	-0.8231	0.7	0.03	1.07	0.12	0.96	0.52	0.69	0	0.07	1.01	0.06	0	8.13	27.08	2.75	25.84	5.38	6	6.17	27.88	25.51	6.39	26.9	21.96
cis_mRNA_overlap	0	Lnc-Overlap-mRNA	LTCONS_00006670	NM_001267157.1	NC_003280.10	4212252	4213448	844	+	NC_003280.10	4211425	4213335	846	+	-318.78	0.6592	0.8063	0.7	0.03	1.07	0.12	0.96	0.52	0.69	0	0.07	1.01	0.06	0	1.98	0	0.76	0	2.08	0.62	1.84	0	0.14	0.16	0	0
cis_mRNA_up10k	2171	NA	LTCONS_00006670	NM_062340.4	NC_003280.10	4212252	4213448	844	+	NC_003280.10	4215618	4218179	1413	+	*	-0.8423	-0.7706	0.7	0.03	1.07	0.12	0.96	0.52	0.69	0	0.07	1.01	0.06	0	2.91	3.85	1.79	6	2.25	2.12	1.76	3.92	6.3	1.55	4.98	6.72
cis_mRNA_up10k	5932	NA	LTCONS_00006670	NM_001306573.1	NC_003280.10	4212252	4213448	844	+	NC_003280.10	4219379	4221769	1374	+	*	-0.8424	-0.718	0.7	0.03	1.07	0.12	0.96	0.52	0.69	0	0.07	1.01	0.06	0	0.49	3.83	0.43	5.16	0.17	0.41	0.33	2.23	5.65	0.38	4.94	7.02
cis_mRNA_up10k	8106	NA	LTCONS_00006670	MTCONS_00009811	NC_003280.10	4212252	4213448	844	+	NC_003280.10	4188869	4204147	9290	-	*	-0.7562	-0.7811	0.7	0.03	1.07	0.12	0.96	0.52	0.69	0	0.07	1.01	0.06	0	0.31	0.4	0.13	1.21	0.15	0.34	0.46	0.84	0.61	0.37	0.68	0.81
cis_mRNA_up10k	8106	NA	LTCONS_00006670	NM_062338.3	NC_003280.10	4212252	4213448	844	+	NC_003280.10	4195030	4204147	5367	-	*	-0.7346	-0.6028	0.7	0.03	1.07	0.12	0.96	0.52	0.69	0	0.07	1.01	0.06	0	1.21	2.95	1.75	4.85	1.07	0.71	0.71	1.75	5	0.78	3.4	5.29
cis_mRNA_dw20k	19862	NA	LTCONS_00006741	NM_001047328.3	NC_003280.10	4570993	4571600	608	+	NC_003280.10	4591461	4598852	2340	-	*	-0.6716	-0.6713	0.45	0.18	0.54	0.09	0.59	0.1	0.73	0.25	0.27	0.31	0.22	0.23	2.68	6.72	2.24	9.6	0.91	2.61	1.86	7.86	8.55	1.66	7.39	9.35
cis_mRNA_dw20k	8525	NA	LTCONS_00006741	NM_001129152.3	NC_003280.10	4570993	4571600	608	+	NC_003280.10	4560407	4562469	1149	+	*	0.9216	0.6993	0.45	0.18	0.54	0.09	0.59	0.1	0.73	0.25	0.27	0.31	0.22	0.23	3.73	0.1	6.88	0.22	5.66	1.61	8.13	0.04	0.13	1.84	0.44	0.11
cis_mRNA_up10k	490	NA	LTCONS_00006741	NM_062406.3	NC_003280.10	4570993	4571600	608	+	NC_003280.10	4572089	4590512	3354	+	*	0.6795	0.7203	0.45	0.18	0.54	0.09	0.59	0.1	0.73	0.25	0.27	0.31	0.22	0.23	132.26	35.13	156.48	36.98	126.32	124.63	135.54	32.14	40.01	124.76	36.22	36.82
cis_mRNA_dw20k	12397	NA	LTCONS_00006795	NM_062464.6	NC_003280.10	4838193	4838605	413	+	NC_003280.10	4825414	4825797	384	+	*	0.9481	0.8601	0.26	7.09	0.25	4.4	0.17	0	0.08	5.62	3.3	0.09	6.72	6.52	44.47	813.64	23.41	826.08	10.16	4.95	4.19	836.87	798.86	1.25	815.12	875.79
cis_mRNA_dw20k	2521	NA	LTCONS_00006795	NM_062468.7	NC_003280.10	4838193	4838605	413	+	NC_003280.10	4835080	4835673	501	+	*	0.9471	0.8462	0.26	7.09	0.25	4.4	0.17	0	0.08	5.62	3.3	0.09	6.72	6.52	5.59	162.56	4.01	162.9	2.22	0.56	2.15	173.67	162.87	0.4	186.35	156.51
cis_mRNA_dw20k	2827	NA	LTCONS_00006795	NM_001027182.2	NC_003280.10	4838193	4838605	413	+	NC_003280.10	4841431	4842211	603	-	*	0.9609	0.9072	0.26	7.09	0.25	4.4	0.17	0	0.08	5.62	3.3	0.09	6.72	6.52	1.22	19.07	1.23	11.93	1.77	0.15	0.64	15.85	11.93	0.05	16.58	10.96
cis_mRNA_dw20k	5677	NA	LTCONS_00006795	MTCONS_00006792	NC_003280.10	4838193	4838605	413	+	NC_003280.10	4828318	4832517	2930	+	*	-0.9216	-0.7552	0.26	7.09	0.25	4.4	0.17	0	0.08	5.62	3.3	0.09	6.72	6.52	16.72	4.62	16.58	4.32	13.04	18.2	15.61	4.21	5.39	15.78	4.78	6.21
cis_mRNA_up10k	3412	NA	LTCONS_00006795	NM_001267161.1	NC_003280.10	4838193	4838605	413	+	NC_003280.10	4834189	4834782	549	-	*	0.9665	0.8951	0.26	7.09	0.25	4.4	0.17	0	0.08	5.62	3.3	0.09	6.72	6.52	3.18	94.4	2.48	74.91	0	0.55	0.66	98.84	76.69	0.35	108.34	78.52
cis_mRNA_up10k	4004	NA	LTCONS_00006795	NM_062470.3	NC_003280.10	4838193	4838605	413	+	NC_003280.10	4842608	4842823	216	+	*	0.8976	0.7552	0.26	7.09	0.25	4.4	0.17	0	0.08	5.62	3.3	0.09	6.72	6.52	5.8	98.07	1.62	118	1.73	0.24	1.82	145.2	101.53	0.51	94.89	94.95
cis_mRNA_up10k	556	NA	LTCONS_00006795	NM_062469.4	NC_003280.10	4838193	4838605	413	+	NC_003280.10	4836367	4837638	1179	-	*	0.9654	0.951	0.26	7.09	0.25	4.4	0.17	0	0.08	5.62	3.3	0.09	6.72	6.52	1.99	28.93	0.93	22.76	0.56	0.11	0.42	24.04	21.8	0.16	27.94	20.95
tran	23734	NA	LTCONS_00006795	NM_001322727.1	NC_003280.10	4838193	4838605	413	+	NC_003280.10	4862338	4863406	972	-	-189.85	0.9606	0.9371	0.26	7.09	0.25	4.4	0.17	0	0.08	5.62	3.3	0.09	6.72	6.52	1.9	57.38	0.83	35.07	0.53	0.27	0.36	41.06	30.5	0.23	57.18	30.09
cis_mRNA_up10k	2926	NA	LTCONS_00006797	NM_001267164.1	NC_003280.10	4846828	4847287	460	+	NC_003280.10	4850212	4851274	336	+	*	0.777	0.6784	0.07	0	0	0.06	0.79	0	0.36	0	0	0.15	0	0	2.47	0.69	0.58	0.39	3.24	1.46	3.69	0.17	0.53	1.06	0.31	0.56
cis_mRNA_up10k	1500	NA	LTCONS_00006798	NM_001267164.1	NC_003280.10	4847401	4848713	1313	+	NC_003280.10	4850212	4851274	336	+	*	0.6416	0.7302	0.14	0	0.35	0.02	0.72	0.04	0.23	0	0.04	0.1	0	0.09	2.47	0.69	0.58	0.39	3.24	1.46	3.69	0.17	0.53	1.06	0.31	0.56
cis_mRNA_up10k	9221	NA	LTCONS_00006798	NM_062473.4	NC_003280.10	4847401	4848713	1313	+	NC_003280.10	4857933	4858847	672	+	*	0.8672	0.7161	0.14	0	0.35	0.02	0.72	0.04	0.23	0	0.04	0.1	0	0.09	22.75	15.94	17.26	11.27	66.21	12.63	43.38	12.6	13.24	23.18	11.26	6.92
cis_mRNA_dw20k	11141	NA	LTCONS_00006807	MTCONS_00006802	NC_003280.10	4869987	4870366	380	+	NC_003280.10	4852057	4858847	2898	+	*	-0.6754	-0.9457	1.5	6.33	0.48	6.1	0.28	0.28	0.19	24.07	5.13	0.39	5.63	5.49	47.2	26.54	47.43	31.45	49.44	51.17	53.04	28.13	31.93	49.93	27.17	31.99
cis_mRNA_dw20k	4247	NA	LTCONS_00006807	NM_001026905.1	NC_003280.10	4869987	4870366	380	+	NC_003280.10	4863713	4865741	603	+	*	0.6736	0.9175	1.5	6.33	0.48	6.1	0.28	0.28	0.19	24.07	5.13	0.39	5.63	5.49	0.61	10.41	0.06	7.4	0.22	0	0	8.89	7.61	0.21	8.76	7.06
cis_mRNA_dw20k	8386	NA	LTCONS_00006807	NM_062475.1	NC_003280.10	4869987	4870366	380	+	NC_003280.10	4861075	4861602	387	+	*	0.6314	0.8404	1.5	6.33	0.48	6.1	0.28	0.28	0.19	24.07	5.13	0.39	5.63	5.49	1.26	27.03	0.46	19.32	1.46	0.09	0.64	19.69	16.67	0.09	21.41	13.87
cis_mRNA_overlap	0	Lnc-AntiCompleteIn-mRNAExon	LTCONS_00006807	NM_062478.6	NC_003280.10	4869987	4870366	380	+	NC_003280.10	4869777	4870771	867	-	-901.9	0.9372	0.8757	1.5	6.33	0.48	6.1	0.28	0.28	0.19	24.07	5.13	0.39	5.63	5.49	271.33	1368.62	85.84	1636.04	2.53	49.55	39.93	3396.85	1696.82	102.4	1287.23	1485.28
cis_mRNA_up10k	6582	NA	LTCONS_00006807	NM_001322727.1	NC_003280.10	4869987	4870366	380	+	NC_003280.10	4862338	4863406	972	-	*	0.6044	0.9037	1.5	6.33	0.48	6.1	0.28	0.28	0.19	24.07	5.13	0.39	5.63	5.49	1.9	57.38	0.83	35.07	0.53	0.27	0.36	41.06	30.5	0.23	57.18	30.09
cis_mRNA_up10k	9628	NA	LTCONS_00006807	NM_062474.4	NC_003280.10	4869987	4870366	380	+	NC_003280.10	4860145	4860360	216	-	*	0.73	0.8511	1.5	6.33	0.48	6.1	0.28	0.28	0.19	24.07	5.13	0.39	5.63	5.49	7.47	115.51	4.32	157.6	0.49	0.97	0.26	157.5	120.8	0.25	118.88	125.01
tran	NA	NA	LTCONS_00006807	NM_077468.5	NC_003280.10	4869987	4870366	380	+	NC_003284.9	11199476	11200376	852	+	-508.17	0.9376	0.8792	1.5	6.33	0.48	6.1	0.28	0.28	0.19	24.07	5.13	0.39	5.63	5.49	146.7	1692.39	109.69	427.91	2.41	207.68	14.77	3912.94	432.61	205.6	1634.94	388.31
tran	NA	NA	LTCONS_00006807	NM_077469.6	NC_003280.10	4869987	4870366	380	+	NC_003284.9	11201539	11202442	852	+	-506	0.9608	0.9247	1.5	6.33	0.48	6.1	0.28	0.28	0.19	24.07	5.13	0.39	5.63	5.49	74.99	301.91	28.64	254.02	2.21	47.99	12.59	667.19	243.95	31.39	313.24	239.24
cis_mRNA_dw20k	17230	NA	LTCONS_00006809	NM_062487.7	NC_003280.10	4874220	4875082	813	+	NC_003280.10	4892311	4892694	384	-	*	0.7277	0.6281	0.14	1.14	0.38	2.45	0.14	0.54	0.27	0.54	1.86	0.32	1.41	3.34	12.01	345.88	10.38	305.98	3.51	1.83	3.54	371.99	343.95	0.38	342.67	354.23
cis_mRNA_up10k	1095	NA	LTCONS_00006809	NM_062479.5	NC_003280.10	4874220	4875082	813	+	NC_003280.10	4872217	4873126	858	-	*	0.8077	0.7579	0.14	1.14	0.38	2.45	0.14	0.54	0.27	0.54	1.86	0.32	1.41	3.34	116.3	2494.18	46.54	2453.92	2.92	14.93	2.61	261.97	2319.11	27.72	2223.49	1964.58
cis_mRNA_up10k	4835	NA	LTCONS_00006809	NM_062481.7	NC_003280.10	4874220	4875082	813	+	NC_003280.10	4879916	4880985	621	+	*	0.8309	0.8877	0.14	1.14	0.38	2.45	0.14	0.54	0.27	0.54	1.86	0.32	1.41	3.34	4.5	25.22	3.87	24.8	3.8	8.31	7.88	21.67	24.97	8.04	29.65	31.27
cis_mRNA_up10k	6798	NA	LTCONS_00006809	NM_062477.5	NC_003280.10	4874220	4875082	813	+	NC_003280.10	4866543	4867423	834	-	*	0.7836	0.7263	0.14	1.14	0.38	2.45	0.14	0.54	0.27	0.54	1.86	0.32	1.41	3.34	30.27	376.09	3.75	340.38	0.6	2.99	0.99	20.02	328.81	14.7	285.92	262.95
cis_mRNA_up10k	7038	NA	LTCONS_00006809	NM_062482.4	NC_003280.10	4874220	4875082	813	+	NC_003280.10	4882119	4883291	621	+	*	-0.7605	-0.8316	0.14	1.14	0.38	2.45	0.14	0.54	0.27	0.54	1.86	0.32	1.41	3.34	275.97	183.05	226.92	174.12	291.55	310.2	281.53	193.09	179.9	317.63	183.33	165.35
cis_mRNA_dw20k	16045	NA	LTCONS_00006821	NM_062501.1	NC_003280.10	4916754	4917893	1140	+	NC_003280.10	4933937	4935016	642	-	*	-0.9073	-0.8592	0.02	0.93	0	0.74	0.33	0	0.18	0.61	0.77	0	0.53	0.59	3.84	0.82	5.78	2.58	4.8	5.66	4.5	1.79	1.85	5.27	1.46	2.35
cis_mRNA_dw20k	17567	NA	LTCONS_00006821	NM_062490.1	NC_003280.10	4916754	4917893	1140	+	NC_003280.10	4898616	4899188	573	+	*	0.8067	0.6596	0.02	0.93	0	0.74	0.33	0	0.18	0.61	0.77	0	0.53	0.59	0.44	3.86	0.28	4.89	0.16	0.37	0.37	4.52	3.02	0.22	6.3	3.92
cis_mRNA_dw20k	5337	NA	LTCONS_00006821	NM_170983.4	NC_003280.10	4916754	4917893	1140	+	NC_003280.10	4905059	4911418	1767	+	*	-0.9017	-0.7888	0.02	0.93	0	0.74	0.33	0	0.18	0.61	0.77	0	0.53	0.59	49.45	24.28	52.02	24.03	49.63	46.36	49.3	24.85	30.4	50.43	25.16	24.24
cis_mRNA_up10k	193	NA	LTCONS_00006821	NM_062497.6	NC_003280.10	4916754	4917893	1140	+	NC_003280.10	4916179	4916562	384	-	*	0.9048	0.8099	0.02	0.93	0	0.74	0.33	0	0.18	0.61	0.77	0	0.53	0.59	26.91	503.39	13.43	512	5.73	3.39	2.7	620.79	513.85	2.87	489.44	488.37
cis_mRNA_up10k	2540	NA	LTCONS_00006821	NM_062495.2	NC_003280.10	4916754	4917893	1140	+	NC_003280.10	4911868	4914215	1578	-	*	-0.9179	-0.8592	0.02	0.93	0	0.74	0.33	0	0.18	0.61	0.77	0	0.53	0.59	14.61	9.46	18.12	7.99	12.51	16.64	14.16	8.38	8.63	14.97	8.55	10.38
cis_mRNA_dw20k	10734	NA	LTCONS_00006829	MTCONS_00009955	NC_003280.10	4943151	4943940	790	+	NC_003280.10	4954673	4959817	3369	-	*	-0.7727	-0.6831	0.29	0.76	0	1.44	0	0	0.18	0.25	1.4	0.04	0.75	1.18	34.73	18.52	39.05	20.28	32.58	36.04	33.77	19.38	21.11	34.72	20.78	22.18
cis_mRNA_dw20k	10734	NA	LTCONS_00006829	MTCONS_00009956	NC_003280.10	4943151	4943940	790	+	NC_003280.10	4954673	4959817	3915	-	*	-0.8192	-0.7888	0.29	0.76	0	1.44	0	0	0.18	0.25	1.4	0.04	0.75	1.18	33.69	24.14	30.53	20.15	26.73	33.92	28.45	24.48	21.39	33.53	20.87	21.42
cis_mRNA_dw20k	10973	NA	LTCONS_00006829	MTCONS_00006823	NC_003280.10	4943151	4943940	790	+	NC_003280.10	4930834	4932179	1251	+	*	0.698	0.6831	0.29	0.76	0	1.44	0	0	0.18	0.25	1.4	0.04	0.75	1.18	0.38	9.93	0.1	5.63	0.21	0.08	0.06	6.09	6.14	0.02	9.4	5.69
cis_mRNA_dw20k	4322	NA	LTCONS_00006829	NM_062509.5	NC_003280.10	4943151	4943940	790	+	NC_003280.10	4948261	4949462	882	-	*	-0.7128	-0.6338	0.29	0.76	0	1.44	0	0	0.18	0.25	1.4	0.04	0.75	1.18	64.39	9.76	56.9	17.91	41.57	81.05	53.44	12.3	19.07	71.04	10.71	18.53
cis_mRNA_dw20k	4594	NA	LTCONS_00006829	MTCONS_00006826	NC_003280.10	4943151	4943940	790	+	NC_003280.10	4935563	4938558	2523	+	*	0.7743	0.8028	0.29	0.76	0	1.44	0	0	0.18	0.25	1.4	0.04	0.75	1.18	0.87	7.58	0.49	5.68	0.09	0.79	1.17	4.6	4.47	0.46	7.46	8.82
cis_mRNA_dw20k	4594	NA	LTCONS_00006829	NM_062503.3	NC_003280.10	4943151	4943940	790	+	NC_003280.10	4938056	4938558	456	+	*	0.628	0.6056	0.29	0.76	0	1.44	0	0	0.18	0.25	1.4	0.04	0.75	1.18	1.19	9.3	0.92	8.93	1.43	0.02	0.77	14.71	8.8	0	12.41	8.81
cis_mRNA_dw20k	5223	NA	LTCONS_00006829	NM_062502.3	NC_003280.10	4943151	4943940	790	+	NC_003280.10	4935563	4937929	1941	+	*	-0.8146	-0.7183	0.29	0.76	0	1.44	0	0	0.18	0.25	1.4	0.04	0.75	1.18	28.02	5.58	27.91	6.55	24.94	28.4	24.41	6.97	7.37	29.16	5.98	4.58
cis_mRNA_dw20k	9742	NA	LTCONS_00006829	NM_062500.8	NC_003280.10	4943151	4943940	790	+	NC_003280.10	4933027	4933410	384	+	*	0.7837	0.7113	0.29	0.76	0	1.44	0	0	0.18	0.25	1.4	0.04	0.75	1.18	25.53	489.21	12.17	477.15	3.61	1.83	2.14	572.09	494.1	0.48	446.63	498.05
cis_mRNA_overlap	0	Lnc-AntiOverlap-mRNA	LTCONS_00006829	MTCONS_00009950	NC_003280.10	4943151	4943940	790	+	NC_003280.10	4942173	4945789	2661	-	-1137.29	-0.7867	-0.6761	0.29	0.76	0	1.44	0	0	0.18	0.25	1.4	0.04	0.75	1.18	44.41	24.42	53.16	26.41	47.22	50.74	41.19	23.68	26.19	48.44	23.77	25.06
cis_mRNA_up10k	2004	NA	LTCONS_00006829	NM_001027353.4	NC_003280.10	4943151	4943940	790	+	NC_003280.10	4938892	4941148	819	-	*	-0.624	-0.6761	0.29	0.76	0	1.44	0	0	0.18	0.25	1.4	0.04	0.75	1.18	55.99	39.94	53.28	34.15	47.42	59.64	58.97	21.75	34.95	56.36	36.37	36.44
cis_mRNA_up10k	2088	NA	LTCONS_00006829	NM_170985.2	NC_003280.10	4943151	4943940	790	+	NC_003280.10	4946027	4947951	1458	+	*	-0.7697	-0.6972	0.29	0.76	0	1.44	0	0	0.18	0.25	1.4	0.04	0.75	1.18	74.12	36.9	88.44	36.25	67.65	87.53	71.63	33.76	40.13	77.73	36.56	41.99
cis_mRNA_up10k	5972	NA	LTCONS_00006829	MTCONS_00006837	NC_003280.10	4943151	4943940	790	+	NC_003280.10	4949911	4954516	3779	+	*	-0.6634	-0.6902	0.29	0.76	0	1.44	0	0	0.18	0.25	1.4	0.04	0.75	1.18	23.99	14.5	25.22	13.79	20.3	27.9	23.53	12.64	17.2	25.34	16.75	18.34
cis_mRNA_up10k	5972	NA	LTCONS_00006829	NM_001306590.1	NC_003280.10	4943151	4943940	790	+	NC_003280.10	4949911	4952924	2334	+	*	-0.6275	-0.6984	0.29	0.76	0	1.44	0	0	0.18	0.25	1.4	0.04	0.75	1.18	15.43	9.11	9.71	9.57	12.66	11.83	11.02	9.67	8.56	11.83	9.98	6.04
cis_mRNA_up10k	5972	NA	LTCONS_00006829	NM_001306591.1	NC_003280.10	4943151	4943940	790	+	NC_003280.10	4949911	4952924	2286	+	*	-0.8324	-0.831	0.29	0.76	0	1.44	0	0	0.18	0.25	1.4	0.04	0.75	1.18	17.61	7.01	28.61	1.37	17.13	16.26	6.93	13.67	2.71	22.91	3.84	3.56
cis_mRNA_up10k	8136	NA	LTCONS_00006829	NM_062501.1	NC_003280.10	4943151	4943940	790	+	NC_003280.10	4933937	4935016	642	-	*	-0.7258	-0.7395	0.29	0.76	0	1.44	0	0	0.18	0.25	1.4	0.04	0.75	1.18	3.84	0.82	5.78	2.58	4.8	5.66	4.5	1.79	1.85	5.27	1.46	2.35
cis_mRNA_dw20k	1291	NA	LTCONS_00006842	NM_062515.3	NC_003280.10	4990017	4990822	751	+	NC_003280.10	4972856	4988727	1887	+	*	0.9064	0.6197	0.46	0	0.79	0	1.41	0.15	1.05	0.1	0.03	0.12	0.17	0	17.29	4.69	12.86	4.26	22.32	5.64	17.58	1	5.66	1.96	1.79	3.57
cis_mRNA_dw20k	1880	NA	LTCONS_00006842	NM_170986.3	NC_003280.10	4990017	4990822	751	+	NC_003280.10	4985073	4988138	996	+	*	0.9123	0.7937	0.46	0	0.79	0	1.41	0.15	1.05	0.1	0.03	0.12	0.17	0	12.14	0.82	9.39	0	18.79	4.31	9.26	1.34	1.41	3.93	0.51	1.34
cis_mRNA_up10k	3399	NA	LTCONS_00006842	NM_062518.5	NC_003280.10	4990017	4990822	751	+	NC_003280.10	4994220	4995476	627	+	*	0.7207	0.7254	0.46	0	0.79	0	1.41	0.15	1.05	0.1	0.03	0.12	0.17	0	126.14	61.71	125.11	66.39	124.97	117.37	122.98	61.23	64.97	115.66	66.24	67.56
cis_mRNA_up10k	5617	NA	LTCONS_00006842	NM_001047321.1	NC_003280.10	4990017	4990822	751	+	NC_003280.10	4996438	4997985	756	+	*	0.945	0.8521	0.46	0	0.79	0	1.41	0.15	1.05	0.1	0.03	0.12	0.17	0	21.39	16.94	21.89	15.97	27.16	15.68	29.22	17.01	16.29	16.96	17.83	13.95
cis_mRNA_up10k	8703	NA	LTCONS_00006842	NM_062520.3	NC_003280.10	4990017	4990822	751	+	NC_003280.10	4999524	5003641	3861	+	*	0.7154	0.8451	0.46	0	0.79	0	1.41	0.15	1.05	0.1	0.03	0.12	0.17	0	97.36	36.96	115.98	34.54	101.77	86.04	87.12	42.55	38.4	93.58	37.49	36.38
cis_mRNA_dw20k	12360	NA	LTCONS_00006854	NM_062527.4	NC_003280.10	5017807	5021936	4130	+	NC_003280.10	5034295	5036426	1362	-	*	0.7514	0.6052	0.62	0.33	0.55	0.23	0.54	0.16	0.64	0.21	0.25	0.23	0.23	0.32	11.59	0	9.88	0	17.8	6.71	11.87	0	0	7.42	0	0
cis_mRNA_dw20k	19823	NA	LTCONS_00006854	NM_001047321.1	NC_003280.10	5017807	5021936	4130	+	NC_003280.10	4996438	4997985	756	+	*	0.8449	0.6338	0.62	0.33	0.55	0.23	0.54	0.16	0.64	0.21	0.25	0.23	0.23	0.32	21.39	16.94	21.89	15.97	27.16	15.68	29.22	17.01	16.29	16.96	17.83	13.95
cis_mRNA_up10k	979	NA	LTCONS_00006854	NM_001306584.1	NC_003280.10	5017807	5021936	4130	+	NC_003280.10	5022914	5029592	4497	+	*	0.8779	0.7443	0.62	0.33	0.55	0.23	0.54	0.16	0.64	0.21	0.25	0.23	0.23	0.32	21.23	12.45	16.08	12.99	20.5	13.59	20.5	10.85	13.99	13.71	15.13	13.79
cis_mRNA_dw20k	11230	NA	LTCONS_00006861	NM_062535.3	NC_003280.10	5056340	5057506	1167	+	NC_003280.10	5068735	5069608	567	-	*	0.6007	0.669	1.31	1.19	0.29	2.26	0.57	0.36	0.91	1.43	1.76	0.31	1.32	3.2	0.66	12.9	0.16	8.35	0	0.12	0	3.88	10.67	0	13.9	8.7
cis_mRNA_dw20k	1429	NA	LTCONS_00006861	NM_062533.3	NC_003280.10	5056340	5057506	1167	+	NC_003280.10	5058934	5060712	1224	-	*	0.6947	0.6224	1.31	1.19	0.29	2.26	0.57	0.36	0.91	1.43	1.76	0.31	1.32	3.2	0.71	2.79	0.87	3.15	1.08	0.44	0.89	0.53	2.33	0.52	3.35	2.97
cis_mRNA_dw20k	163	NA	LTCONS_00006861	NM_062531.5	NC_003280.10	5056340	5057506	1167	+	NC_003280.10	5055622	5056178	393	+	*	0.7095	0.7063	1.31	1.19	0.29	2.26	0.57	0.36	0.91	1.43	1.76	0.31	1.32	3.2	1917.8	2729.27	2044.44	3187.6	1929.55	2062.88	2171.12	3024.43	2841.22	2251.93	2926.36	2861.08
cis_mRNA_up10k	1186	NA	LTCONS_00006861	NM_062530.7	NC_003280.10	5056340	5057506	1167	+	NC_003280.10	5054261	5055155	735	-	*	-0.7399	-0.7203	1.31	1.19	0.29	2.26	0.57	0.36	0.91	1.43	1.76	0.31	1.32	3.2	240.72	110.2	263.2	117.74	204.29	273.33	202.01	130.16	129.25	257.92	110.71	121.18
cis_mRNA_up10k	4632	NA	LTCONS_00006861	NM_062534.4	NC_003280.10	5056340	5057506	1167	+	NC_003280.10	5062137	5066970	3231	+	*	-0.7227	-0.7692	1.31	1.19	0.29	2.26	0.57	0.36	0.91	1.43	1.76	0.31	1.32	3.2	92.06	46.09	102.11	40.01	101.95	84.9	94.22	43.95	43.7	82.78	47.81	46.71
cis_mRNA_dw20k	13543	NA	LTCONS_00006863	NM_062534.4	NC_003280.10	5080512	5083220	2709	+	NC_003280.10	5062137	5066970	3231	+	*	0.7608	0.8169	0.19	0.01	0.16	0.04	0.5	0.07	0.38	0.02	0.01	0.06	0.03	0.01	92.06	46.09	102.11	40.01	101.95	84.9	94.22	43.95	43.7	82.78	47.81	46.71
cis_mRNA_overlap	0	Lnc-AntiOverlap-mRNA	LTCONS_00006863	MTCONS_00009983	NC_003280.10	5080512	5083220	2709	+	NC_003280.10	5078429	5091636	9161	-	-3964.49	0.6656	0.7254	0.19	0.01	0.16	0.04	0.5	0.07	0.38	0.02	0.01	0.06	0.03	0.01	25.14	11.27	24.25	11.8	24.38	27.43	29.15	10.9	13.04	24.7	12.13	14.37
cis_mRNA_overlap	0	Lnc-AntiOverlap-mRNA	LTCONS_00006863	NM_062536.6	NC_003280.10	5080512	5083220	2709	+	NC_003280.10	5078429	5081157	2280	-	*	0.7662	0.8521	0.19	0.01	0.16	0.04	0.5	0.07	0.38	0.02	0.01	0.06	0.03	0.01	54.07	14.48	62.69	15.17	70.69	52.19	52.5	16.94	15.7	50.49	13.95	14.95
cis_mRNA_overlap	0	Lnc-AntiOverlap-mRNA	LTCONS_00006863	NM_062537.5	NC_003280.10	5080512	5083220	2709	+	NC_003280.10	5081708	5083433	1257	-	*	0.6015	0.8451	0.19	0.01	0.16	0.04	0.5	0.07	0.38	0.02	0.01	0.06	0.03	0.01	14.46	11.26	15.4	12.19	16.6	12.79	14.49	12.2	11.15	17.55	11.53	7.24
cis_mRNA_dw20k	18148	NA	LTCONS_00006901	NM_182160.3	NC_003280.10	5322686	5324711	2026	+	NC_003280.10	5342858	5344852	240	-	*	0.6376	0.6923	1.54	0.61	2.12	0.93	3.09	1.03	3.28	0.67	1.2	0.81	0.82	1.46	1.16	0.37	0.63	1.38	1.21	0.6	1.47	0.49	0.38	0.21	0.73	1.02
cis_mRNA_up10k	6779	NA	LTCONS_00006901	NM_062596.4	NC_003280.10	5322686	5324711	2026	+	NC_003280.10	5331489	5340247	1974	+	*	0.9388	0.8112	1.54	0.61	2.12	0.93	3.09	1.03	3.28	0.67	1.2	0.81	0.82	1.46	37.65	16.11	39.1	18.01	96.45	11.73	74.43	9.08	21.09	19.54	18.94	18.3
cis_mRNA_dw20k	18334	NA	LTCONS_00006902	MTCONS_00010042	NC_003280.10	5325009	5328224	3216	+	NC_003280.10	5346557	5350546	3243	-	*	0.6341	0.6014	1.17	0.72	1.29	0.63	2.45	0.7	2.64	0.49	0.93	0.58	0.76	1.19	4.2	3.03	4.64	2.68	4.49	3.91	4.59	2.75	2.18	3.88	3.35	2.98
cis_mRNA_dw20k	19873	NA	LTCONS_00006902	NM_062599.1	NC_003280.10	5325009	5328224	3216	+	NC_003280.10	5348096	5350546	1758	-	*	0.769	0.6364	1.17	0.72	1.29	0.63	2.45	0.7	2.64	0.49	0.93	0.58	0.76	1.19	5.81	3.03	4.48	4.02	6.32	3.21	5.25	2.55	4	4.06	3.64	3.5
cis_mRNA_up10k	3266	NA	LTCONS_00006902	NM_062596.4	NC_003280.10	5325009	5328224	3216	+	NC_003280.10	5331489	5340247	1974	+	*	0.9486	0.8112	1.17	0.72	1.29	0.63	2.45	0.7	2.64	0.49	0.93	0.58	0.76	1.19	37.65	16.11	39.1	18.01	96.45	11.73	74.43	9.08	21.09	19.54	18.94	18.3
cis_mRNA_up10k	8084	NA	LTCONS_00006902	NM_062597.1	NC_003280.10	5325009	5328224	3216	+	NC_003280.10	5336307	5340247	1821	+	*	0.8107	0.6853	1.17	0.72	1.29	0.63	2.45	0.7	2.64	0.49	0.93	0.58	0.76	1.19	4.56	2.35	2.13	1.02	4.85	0.58	5.97	2.54	1.5	0.63	1.91	4.61
cis_mRNA_up10k	2503	NA	LTCONS_00006903	NM_062596.4	NC_003280.10	5328446	5328987	542	+	NC_003280.10	5331489	5340247	1974	+	*	0.8935	0.6014	0.77	0.97	1.26	0.85	3.15	1.13	2.1	0.1	1.05	1.07	1.4	0.82	37.65	16.11	39.1	18.01	96.45	11.73	74.43	9.08	21.09	19.54	18.94	18.3
cis_mRNA_dw20k	15243	NA	LTCONS_00006904	MTCONS_00010042	NC_003280.10	5330958	5331315	358	+	NC_003280.10	5346557	5350546	3243	-	*	0.7007	0.7483	1.43	0.93	3.65	0.62	6.37	1.12	4.16	0.95	0.86	0.32	1.4	0.6	4.2	3.03	4.64	2.68	4.49	3.91	4.59	2.75	2.18	3.88	3.35	2.98
cis_mRNA_dw20k	1777	NA	LTCONS_00006908	NM_062596.4	NC_003280.10	5342023	5343098	1076	+	NC_003280.10	5331489	5340247	1974	+	*	0.9078	0.779	0.17	0.02	0.17	0.15	1.1	0.07	0.63	0.11	0.11	0.42	0.14	0	37.65	16.11	39.1	18.01	96.45	11.73	74.43	9.08	21.09	19.54	18.94	18.3
cis_mRNA_dw20k	4999	NA	LTCONS_00006908	NM_062599.1	NC_003280.10	5342023	5343098	1076	+	NC_003280.10	5348096	5350546	1758	-	*	0.7507	0.8737	0.17	0.02	0.17	0.15	1.1	0.07	0.63	0.11	0.11	0.42	0.14	0	5.81	3.03	4.48	4.02	6.32	3.21	5.25	2.55	4	4.06	3.64	3.5
cis_mRNA_up10k	9012	NA	LTCONS_00006908	NM_062601.3	NC_003280.10	5342023	5343098	1076	+	NC_003280.10	5352109	5353217	936	+	*	0.7188	0.7439	0.17	0.02	0.17	0.15	1.1	0.07	0.63	0.11	0.11	0.42	0.14	0	63.33	39.01	78.88	34.05	83.43	58.14	71.86	37.55	37.16	66.53	39.16	34.84
cis_mRNA_dw20k	16185	NA	LTCONS_00006918	MTCONS_00006913	NC_003280.10	5372421	5373080	660	+	NC_003280.10	5352109	5356237	3747	+	*	0.6895	0.69	0.54	0.24	0.62	0.35	0.58	0.7	1.01	0.5	0.37	0.19	0.4	0.38	9.79	3.46	10.37	4.13	10.37	11.99	11.91	3.05	4.08	8.76	3.96	5.05
cis_mRNA_dw20k	14227	NA	LTCONS_00006926	NM_062608.5	NC_003280.10	5389247	5389842	596	+	NC_003280.10	5374004	5375021	912	+	*	-0.6789	-0.6701	0	0	0	0	0.66	0.05	0.1	0	0	0	0	0	52.46	80.44	64.29	78.43	39.22	62.92	48.21	77.52	75.74	60.41	82.18	73.01
cis_mRNA_dw20k	15008	NA	LTCONS_00006940	NM_062642.1	NC_003280.10	5460871	5465603	4733	+	NC_003280.10	5480610	5482036	438	-	*	0.7926	0.7413	0.66	0.44	0.76	0.38	0.9	0.55	1.06	0.24	0.46	0.58	0.28	0.65	0.72	0.21	0.69	0.46	1.3	0.53	1.53	0.65	0.28	0.87	0.62	0.88
cis_mRNA_dw20k	2267	NA	LTCONS_00006940	MTCONS_00006938	NC_003280.10	5460871	5465603	4733	+	NC_003280.10	5453847	5458605	3643	+	*	0.6304	0.6993	0.66	0.44	0.76	0.38	0.9	0.55	1.06	0.24	0.46	0.58	0.28	0.65	42.66	18.89	43.79	20.79	34.18	51.97	40.82	20.8	22.9	39.72	20.26	27.63
cis_mRNA_up10k	872	NA	LTCONS_00006940	NM_001027038.2	NC_003280.10	5460871	5465603	4733	+	NC_003280.10	5466474	5473385	4335	+	*	0.8193	0.6783	0.66	0.44	0.76	0.38	0.9	0.55	1.06	0.24	0.46	0.58	0.28	0.65	5.51	1.23	3.29	2.74	7.11	1.26	9.21	0.85	2.1	1.1	2.28	1.88
cis_mRNA_up10k	872	NA	LTCONS_00006940	NM_001136345.2	NC_003280.10	5460871	5465603	4733	+	NC_003280.10	5466474	5473385	4224	+	*	0.8664	0.8392	0.66	0.44	0.76	0.38	0.9	0.55	1.06	0.24	0.46	0.58	0.28	0.65	16.83	6.47	20.89	5.69	33.62	7.37	25.15	3.75	7.43	6.39	9.58	14.93
cis_mRNA_up10k	8806	NA	LTCONS_00006940	NM_001027036.2	NC_003280.10	5460871	5465603	4733	+	NC_003280.10	5474408	5475290	444	+	*	-0.7544	-0.7832	0.66	0.44	0.76	0.38	0.9	0.55	1.06	0.24	0.46	0.58	0.28	0.65	9.6	56.04	22.96	42.95	17.41	12.96	15.49	58.22	41.18	18.35	49.07	37.89
cis_mRNA_up10k	6160	NA	LTCONS_00006968	NM_062664.2	NC_003280.10	5546368	5547580	1213	+	NC_003280.10	5539300	5540209	807	-	*	0.854	0.6721	0.13	0	0.11	0	0.79	0	0.51	0	0	0.05	0	0.06	0.09	0	0.02	0	0.17	0.03	0.27	0	0	0.02	0.03	0
cis_mRNA_up10k	9182	NA	LTCONS_00006968	NM_062670.1	NC_003280.10	5546368	5547580	1213	+	NC_003280.10	5556761	5557088	276	+	*	0.8803	0.6457	0.13	0	0.11	0	0.79	0	0.51	0	0	0.05	0	0.06	3.33	1.57	0.97	0.94	6.12	0.62	3.88	0.64	2.07	1.13	2.71	1.73
cis_mRNA_dw20k	11686	NA	LTCONS_00006979	NM_062670.1	NC_003280.10	5568773	5569915	1143	+	NC_003280.10	5556761	5557088	276	+	*	0.8694	0.6364	3.36	2	2.32	1.8	5.58	0.89	5.08	1.51	1.7	1.17	1.14	1.85	3.33	1.57	0.97	0.94	6.12	0.62	3.88	0.64	2.07	1.13	2.71	1.73
cis_mRNA_dw20k	19679	NA	LTCONS_00006979	NM_062684.5	NC_003280.10	5568773	5569915	1143	+	NC_003280.10	5589593	5593373	2082	-	*	0.9481	0.7324	3.36	2	2.32	1.8	5.58	0.89	5.08	1.51	1.7	1.17	1.14	1.85	11.26	2.5	6.53	1.4	18.02	1.42	13.41	0	2.17	3.15	0	0
cis_mRNA_dw20k	1051	NA	LTCONS_00006993	NM_062687.5	NC_003280.10	5599369	5600305	937	+	NC_003280.10	5596571	5598319	1443	+	*	-0.6803	-0.6014	0.41	0.7	0.17	1.05	0.18	0.09	0.34	0.38	0.99	0.06	0.13	0.96	66.02	27.64	76.78	29.91	58.47	74.29	60.65	29.37	31.61	68.76	30.35	33.46
cis_mRNA_dw20k	11827	NA	LTCONS_00006993	NM_062682.5	NC_003280.10	5599369	5600305	937	+	NC_003280.10	5586179	5587543	861	+	*	0.6713	0.6014	0.41	0.7	0.17	1.05	0.18	0.09	0.34	0.38	0.99	0.06	0.13	0.96	161.34	281.62	37.01	367.03	26.31	231.99	74.42	254.3	356.91	188.52	318.4	354.21
cis_mRNA_dw20k	14677	NA	LTCONS_00006993	NM_062681.4	NC_003280.10	5599369	5600305	937	+	NC_003280.10	5583136	5584693	996	+	*	0.8351	0.7596	0.41	0.7	0.17	1.05	0.18	0.09	0.34	0.38	0.99	0.06	0.13	0.96	0	0	0	0.1	0	0	0	0	0.05	0	0	0.05
cis_mRNA_dw20k	19645	NA	LTCONS_00006993	NM_062679.3	NC_003280.10	5599369	5600305	937	+	NC_003280.10	5578362	5579725	696	+	*	0.7011	0.6014	0.41	0.7	0.17	1.05	0.18	0.09	0.34	0.38	0.99	0.06	0.13	0.96	3.71	58.07	1.78	53.49	0.25	1.02	0.86	15.7	53.7	0.13	57.54	43.14
cis_mRNA_dw20k	19129	NA	LTCONS_00006994	NM_062682.5	NC_003280.10	5606671	5606955	285	+	NC_003280.10	5586179	5587543	861	+	*	-0.7289	-0.8071	0.33	0	0.15	0	0.89	0	0.31	0	0	0	0	0	161.34	281.62	37.01	367.03	26.31	231.99	74.42	254.3	356.91	188.52	318.4	354.21
cis_mRNA_dw20k	11127	NA	LTCONS_00007003	NM_062705.7	NC_003280.10	5646351	5646730	380	+	NC_003280.10	5657856	5659767	1203	-	*	0.7095	0.6224	0.5	0.25	0.57	0.08	0.56	0.37	0.66	0.55	0.17	0.97	0	0.27	66.83	23.56	75.15	25.34	65.72	80.87	70.52	24.38	27.08	74.46	25.3	28.94
cis_mRNA_dw20k	13154	NA	LTCONS_00007003	MTCONS_00006998	NC_003280.10	5646351	5646730	380	+	NC_003280.10	5622897	5633198	9815	+	*	0.6159	0.6573	0.5	0.25	0.57	0.08	0.56	0.37	0.66	0.55	0.17	0.97	0	0.27	2.85	0.53	3.31	1.47	2.68	3.69	3.38	0.56	0.87	3.7	1.66	1.92
cis_mRNA_dw20k	13154	NA	LTCONS_00007003	NM_062695.4	NC_003280.10	5646351	5646730	380	+	NC_003280.10	5631359	5633198	1590	+	*	0.7086	0.7762	0.5	0.25	0.57	0.08	0.56	0.37	0.66	0.55	0.17	0.97	0	0.27	58.27	23.13	61.84	27.28	39.19	69.62	53.85	30.31	28.4	65.22	21.7	29.55
cis_mRNA_dw20k	4710	NA	LTCONS_00007003	NM_062703.3	NC_003280.10	5646351	5646730	380	+	NC_003280.10	5651439	5652421	936	-	*	-0.8024	-0.8476	0.5	0.25	0.57	0.08	0.56	0.37	0.66	0.55	0.17	0.97	0	0.27	4.39	156.63	3.3	99.35	0.09	1.38	0.09	1.4	103.73	0.73	129.33	81.12
cis_mRNA_dw20k	477	NA	LTCONS_00007003	MTCONS_00010120	NC_003280.10	5646351	5646730	380	+	NC_003280.10	5647206	5649441	1463	-	*	0.6636	0.6923	0.5	0.25	0.57	0.08	0.56	0.37	0.66	0.55	0.17	0.97	0	0.27	22.4	11.86	28.58	6.7	23.25	21.91	15.9	11.25	8.39	22.3	11.68	8.49
cis_mRNA_dw20k	477	NA	LTCONS_00007003	MTCONS_00010121	NC_003280.10	5646351	5646730	380	+	NC_003280.10	5647206	5649441	1852	-	*	0.6387	0.6224	0.5	0.25	0.57	0.08	0.56	0.37	0.66	0.55	0.17	0.97	0	0.27	22.35	8.19	18.86	10.89	16.49	25.62	24.66	8.04	10.91	21.7	7.06	13.19
cis_mRNA_dw20k	6400	NA	LTCONS_00007003	MTCONS_00007001	NC_003280.10	5646351	5646730	380	+	NC_003280.10	5638361	5639952	1310	+	*	-0.6346	-0.6713	0.5	0.25	0.57	0.08	0.56	0.37	0.66	0.55	0.17	0.97	0	0.27	0.16	3.58	0.07	1.92	0.12	0.02	0.05	3.27	2.05	0	3.05	1.99
cis_mRNA_overlap	0	Lnc-AntiCompleteIn-mRNAExon	LTCONS_00007003	NM_062699.4	NC_003280.10	5646351	5646730	380	+	NC_003280.10	5640436	5647037	4866	-	-722.9	0.7333	0.7902	0.5	0.25	0.57	0.08	0.56	0.37	0.66	0.55	0.17	0.97	0	0.27	36.05	17.94	39.58	14.89	33.02	36	30.96	17.76	17.1	36.61	16.58	16.95
cis_mRNA_up10k	7786	NA	LTCONS_00007003	NM_062704.3	NC_003280.10	5646351	5646730	380	+	NC_003280.10	5654515	5657212	2436	+	*	0.7125	0.6224	0.5	0.25	0.57	0.08	0.56	0.37	0.66	0.55	0.17	0.97	0	0.27	77.51	30.42	69.93	32.13	72.14	76.93	71.19	32.61	33.82	72.12	28.9	33.38
cis_mRNA_dw20k	13418	NA	LTCONS_00007038	NM_062737.6	NC_003280.10	5758048	5758774	317	+	NC_003280.10	5772191	5774168	843	-	*	-0.6284	-0.7796	2.86	57.94	1.27	60.73	0.75	0.49	1.14	61.83	60.33	0	71.6	60.28	0.76	0.03	0.13	0.12	0.3	0.16	0.29	0	0.03	0.14	0	0.03
cis_mRNA_dw20k	1386	NA	LTCONS_00007038	MTCONS_00007034	NC_003280.10	5758048	5758774	317	+	NC_003280.10	5750200	5756663	1765	+	*	0.9019	0.7902	2.86	57.94	1.27	60.73	0.75	0.49	1.14	61.83	60.33	0	71.6	60.28	0.49	1.98	0.18	4.15	0.58	0.36	0.38	2.23	3.32	0.19	2.39	3.59
cis_mRNA_dw20k	1386	NA	LTCONS_00007038	MTCONS_00007035	NC_003280.10	5758048	5758774	317	+	NC_003280.10	5750200	5756663	1765	+	*	0.9019	0.7902	2.86	57.94	1.27	60.73	0.75	0.49	1.14	61.83	60.33	0	71.6	60.28	0.49	1.98	0.18	4.15	0.58	0.36	0.38	2.23	3.32	0.19	2.39	3.59
cis_mRNA_dw20k	4071	NA	LTCONS_00007038	NM_062732.5	NC_003280.10	5758048	5758774	317	+	NC_003280.10	5750200	5753978	1632	+	*	0.9948	0.9091	2.86	57.94	1.27	60.73	0.75	0.49	1.14	61.83	60.33	0	71.6	60.28	20.52	154.38	22.31	153.02	10.2	7.82	9.03	145.91	140.12	7.12	159.25	139.4
cis_mRNA_dw20k	4071	NA	LTCONS_00007038	NM_062733.4	NC_003280.10	5758048	5758774	317	+	NC_003280.10	5750200	5753978	1581	+	*	0.9887	0.8811	2.86	57.94	1.27	60.73	0.75	0.49	1.14	61.83	60.33	0	71.6	60.28	12.11	108.82	8.01	138.27	5.02	4.49	4.56	117.47	130.95	4.16	125.21	134.75
cis_mRNA_up10k	6869	NA	LTCONS_00007038	NM_062735.4	NC_003280.10	5758048	5758774	317	+	NC_003280.10	5765642	5771691	1770	+	*	0.9866	0.8042	2.86	57.94	1.27	60.73	0.75	0.49	1.14	61.83	60.33	0	71.6	60.28	53.32	228.5	25.6	254.25	29.77	28.11	35.4	224.15	249.68	26.84	224.87	216.58
cis_mRNA_dw20k	4998	NA	LTCONS_00007039	MTCONS_00007034	NC_003280.10	5761660	5764817	3158	+	NC_003280.10	5750200	5756663	1765	+	*	0.7825	0.8441	0.24	0.3	0.07	0.52	0.23	0.11	0.45	0.2	0.56	0.18	0.52	0.76	0.49	1.98	0.18	4.15	0.58	0.36	0.38	2.23	3.32	0.19	2.39	3.59
cis_mRNA_dw20k	4998	NA	LTCONS_00007039	MTCONS_00007035	NC_003280.10	5761660	5764817	3158	+	NC_003280.10	5750200	5756663	1765	+	*	0.7825	0.8441	0.24	0.3	0.07	0.52	0.23	0.11	0.45	0.2	0.56	0.18	0.52	0.76	0.49	1.98	0.18	4.15	0.58	0.36	0.38	2.23	3.32	0.19	2.39	3.59
cis_mRNA_dw20k	7683	NA	LTCONS_00007039	NM_062733.4	NC_003280.10	5761660	5764817	3158	+	NC_003280.10	5750200	5753978	1581	+	*	0.7005	0.7531	0.24	0.3	0.07	0.52	0.23	0.11	0.45	0.2	0.56	0.18	0.52	0.76	12.11	108.82	8.01	138.27	5.02	4.49	4.56	117.47	130.95	4.16	125.21	134.75
cis_mRNA_up10k	4145	NA	LTCONS_00007039	NM_062736.3	NC_003280.10	5761660	5764817	3158	+	NC_003280.10	5768961	5771691	1677	+	*	0.7214	0.7356	0.24	0.3	0.07	0.52	0.23	0.11	0.45	0.2	0.56	0.18	0.52	0.76	17.91	41.77	7.62	44.73	9.42	12.18	6.33	36.49	43.86	12.21	43.59	50.88
cis_mRNA_up10k	826	NA	LTCONS_00007039	NM_062735.4	NC_003280.10	5761660	5764817	3158	+	NC_003280.10	5765642	5771691	1770	+	*	0.6567	0.7601	0.24	0.3	0.07	0.52	0.23	0.11	0.45	0.2	0.56	0.18	0.52	0.76	53.32	228.5	25.6	254.25	29.77	28.11	35.4	224.15	249.68	26.84	224.87	216.58
cis_mRNA_dw20k	11098	NA	LTCONS_00007040	NM_062732.5	NC_003280.10	5765075	5765350	276	+	NC_003280.10	5750200	5753978	1632	+	*	0.6787	0.6479	0.35	0.43	0.32	0.13	0	0	0.16	1.03	0.59	0	0.57	1.1	20.52	154.38	22.31	153.02	10.2	7.82	9.03	145.91	140.12	7.12	159.25	139.4
cis_mRNA_dw20k	11098	NA	LTCONS_00007040	NM_062733.4	NC_003280.10	5765075	5765350	276	+	NC_003280.10	5750200	5753978	1581	+	*	0.6905	0.6972	0.35	0.43	0.32	0.13	0	0	0.16	1.03	0.59	0	0.57	1.1	12.11	108.82	8.01	138.27	5.02	4.49	4.56	117.47	130.95	4.16	125.21	134.75
cis_mRNA_dw20k	8528	NA	LTCONS_00007040	NM_062731.5	NC_003280.10	5765075	5765350	276	+	NC_003280.10	5754480	5756548	483	+	*	0.6968	0.7549	0.35	0.43	0.32	0.13	0	0	0.16	1.03	0.59	0	0.57	1.1	0.1	0.22	0.59	0.16	0	0.18	0.08	0.28	0.2	0	0.32	0.91
cis_mRNA_up10k	3612	NA	LTCONS_00007040	NM_062736.3	NC_003280.10	5765075	5765350	276	+	NC_003280.10	5768961	5771691	1677	+	*	0.6891	0.6056	0.35	0.43	0.32	0.13	0	0	0.16	1.03	0.59	0	0.57	1.1	17.91	41.77	7.62	44.73	9.42	12.18	6.33	36.49	43.86	12.21	43.59	50.88
cis_mRNA_dw20k	13406	NA	LTCONS_00007066	MTCONS_00007061	NC_003280.10	5865126	5866989	1440	+	NC_003280.10	5844875	5851721	4860	+	*	0.9145	0.9282	1.16	2.11	1.05	4.15	1.41	1.2	1.6	1.89	3.37	0.75	2.91	3.88	0.33	1.02	0.18	1.38	0.79	0.3	0.81	0.57	1.43	0.29	0.81	1.65
cis_mRNA_dw20k	14912	NA	LTCONS_00007066	NM_062765.5	NC_003280.10	5865126	5866989	1440	+	NC_003280.10	5847746	5850215	1521	+	*	0.9332	0.8616	1.16	2.11	1.05	4.15	1.41	1.2	1.6	1.89	3.37	0.75	2.91	3.88	2.65	7.94	1.38	9.62	2.65	1.89	1.51	4.83	10.79	1.65	9.77	11.47
cis_mRNA_dw20k	190	NA	LTCONS_00007066	NM_062769.3	NC_003280.10	5865126	5866989	1440	+	NC_003280.10	5864195	5864937	336	+	*	0.9264	0.9091	1.16	2.11	1.05	4.15	1.41	1.2	1.6	1.89	3.37	0.75	2.91	3.88	8.48	9.31	6.81	20.76	2.72	7.99	9.1	10.58	19.96	3.99	16.18	29.11
cis_mRNA_dw20k	685	NA	LTCONS_00007066	MTCONS_00010181	NC_003280.10	5865126	5866989	1440	+	NC_003280.10	5867673	5873746	2970	-	*	-0.8193	-0.7762	1.16	2.11	1.05	4.15	1.41	1.2	1.6	1.89	3.37	0.75	2.91	3.88	61.8	21.32	74.49	21.16	53.09	73.67	54.12	19.67	24.27	70.16	21.09	22.36
cis_mRNA_up10k	6746	NA	LTCONS_00007066	NM_062768.4	NC_003280.10	5865126	5866989	1440	+	NC_003280.10	5857270	5858381	663	-	*	0.9231	0.8951	1.16	2.11	1.05	4.15	1.41	1.2	1.6	1.89	3.37	0.75	2.91	3.88	0.9	1.7	0.66	2.01	0.4	0.43	1	1.26	2.06	0.23	2.05	2.26
cis_mRNA_dw20k	19606	NA	LTCONS_00007090	NM_001129146.2	NC_003280.10	5927036	5927603	568	+	NC_003280.10	5906592	5907431	615	+	*	-0.7372	-0.7951	0.22	0.29	0.16	0.89	0.27	0.05	0.16	0.09	0.39	0	0.73	0.51	7.52	3.13	9.03	1.66	6.99	8.93	9.81	4.06	1.04	8.14	2.38	2.72
cis_mRNA_dw20k	2175	NA	LTCONS_00007090	MTCONS_00007084	NC_003280.10	5927036	5927603	568	+	NC_003280.10	5912604	5924862	8434	+	*	-0.6293	-0.697	0.22	0.29	0.16	0.89	0.27	0.05	0.16	0.09	0.39	0	0.73	0.51	5.42	0.73	4.62	0.51	3.27	7.12	4.13	0.92	1.08	3.98	0.7	2.65
cis_mRNA_dw20k	2579	NA	LTCONS_00007090	NM_062784.4	NC_003280.10	5927036	5927603	568	+	NC_003280.10	5921972	5924458	1833	+	*	-0.644	-0.641	0.22	0.29	0.16	0.89	0.27	0.05	0.16	0.09	0.39	0	0.73	0.51	49.13	18.06	54.03	12.06	62.14	41.46	44.07	21.86	12.46	46.81	15.08	6.33
cis_mRNA_dw20k	5229	NA	LTCONS_00007091	MTCONS_00007080	NC_003280.10	5930090	5932196	2107	+	NC_003280.10	5906592	5924862	12608	+	*	-0.7078	-0.6853	0.74	1.46	0.85	1.5	0.83	0.51	0.48	1.39	1.93	0.41	1.07	2.41	38.72	13.89	37.68	17.51	29.25	44.21	40.81	12.9	19.54	36.38	16.61	23.68
cis_mRNA_dw20k	5229	NA	LTCONS_00007091	MTCONS_00007084	NC_003280.10	5930090	5932196	2107	+	NC_003280.10	5912604	5924862	8434	+	*	-0.6387	-0.6713	0.74	1.46	0.85	1.5	0.83	0.51	0.48	1.39	1.93	0.41	1.07	2.41	5.42	0.73	4.62	0.51	3.27	7.12	4.13	0.92	1.08	3.98	0.7	2.65
cis_mRNA_dw20k	5633	NA	LTCONS_00007091	NM_062784.4	NC_003280.10	5930090	5932196	2107	+	NC_003280.10	5921972	5924458	1833	+	*	-0.8154	-0.7622	0.74	1.46	0.85	1.5	0.83	0.51	0.48	1.39	1.93	0.41	1.07	2.41	49.13	18.06	54.03	12.06	62.14	41.46	44.07	21.86	12.46	46.81	15.08	6.33
cis_mRNA_dw20k	316	NA	LTCONS_00007118	NM_062815.6	NC_003280.10	6077566	6078235	327	+	NC_003280.10	6078550	6080720	1845	-	*	-0.6404	-0.6434	1.11	6.04	1.45	3.85	0.85	1.76	0.25	2.95	2.04	1.47	6.35	3.81	51.78	38.03	59.31	36.85	47.59	64.3	49.25	34.89	37.43	59.55	36.45	36.88
cis_mRNA_dw20k	19805	NA	LTCONS_00007135	NM_001038244.2	NC_003280.10	6176653	6177220	568	+	NC_003280.10	6136096	6156849	2673	+	*	0.6913	0.7986	0.22	0.86	0.11	0.23	0.27	0.05	0.32	0.28	0.3	0.06	0.59	0.67	0.74	2.51	0.64	2.26	0.93	0.49	1.17	2.15	2.51	0.27	2.89	1.71
cis_mRNA_dw20k	19805	NA	LTCONS_00007135	NM_062827.4	NC_003280.10	6176653	6177220	568	+	NC_003280.10	6147186	6156849	2880	+	*	0.7589	0.7902	0.22	0.86	0.11	0.23	0.27	0.05	0.32	0.28	0.3	0.06	0.59	0.67	2.17	4.18	2.18	4.23	3.1	1.07	3.27	3.67	3.75	1.72	4.88	4.05
cis_mRNA_dw20k	3783	NA	LTCONS_00007135	NM_062830.1	NC_003280.10	6176653	6177220	568	+	NC_003280.10	6171542	6172871	435	+	*	0.6219	0.6294	0.22	0.86	0.11	0.23	0.27	0.05	0.32	0.28	0.3	0.06	0.59	0.67	0.57	1.66	0.93	1.74	0.62	0.08	0.85	0.26	2.28	0.48	1.61	2.01
cis_mRNA_dw20k	5282	NA	LTCONS_00007139	NM_062836.1	NC_003280.10	6189084	6190573	1490	+	NC_003280.10	6195854	6196935	909	-	*	0.6098	0.7902	0.26	0.05	0.19	0	0.94	0.07	0.49	0.02	0.05	0.05	0	0.08	18.22	9.42	17.53	9.11	21.14	21.25	20.91	8.83	10.79	20.45	8.66	11.92
cis_mRNA_overlap	0	Lnc-AntiOverlap-mRNA	LTCONS_00007139	NM_001267178.1	NC_003280.10	6189084	6190573	1490	+	NC_003280.10	6189712	6191374	987	-	*	0.9585	0.8463	0.26	0.05	0.19	0	0.94	0.07	0.49	0.02	0.05	0.05	0	0.08	4.09	0.56	4.22	0.8	8.63	0.97	5.69	0.36	0.55	0.8	0.62	0.88
cis_mRNA_dw20k	14846	NA	LTCONS_00007165	NM_001026911.2	NC_003280.10	6299490	6301454	1387	+	NC_003280.10	6283386	6284645	789	+	*	0.6533	0.7413	0.22	4.54	0.09	2.51	0.17	0.04	0.4	3.73	3.04	0	4.24	2.54	2.16	2.45	1.4	2.41	1.22	0.81	1.65	1.15	2.19	0.78	2.73	1.99
cis_mRNA_dw20k	16634	NA	LTCONS_00007165	MTCONS_00010260	NC_003280.10	6299490	6301454	1387	+	NC_003280.10	6318087	6323079	4108	-	*	-0.6774	-0.6643	0.22	4.54	0.09	2.51	0.17	0.04	0.4	3.73	3.04	0	4.24	2.54	18.94	17.12	23.4	14.77	16.59	21.75	17.3	12.66	14.36	21.18	16.99	14.96
cis_mRNA_dw20k	16730	NA	LTCONS_00007165	NM_062868.4	NC_003280.10	6299490	6301454	1387	+	NC_003280.10	6318183	6321075	2580	-	*	-0.966	-0.951	0.22	4.54	0.09	2.51	0.17	0.04	0.4	3.73	3.04	0	4.24	2.54	62.26	12.49	64.19	18.13	56.21	66.45	55.09	16.12	20.46	63.23	14.73	21.09
cis_mRNA_dw20k	19839	NA	LTCONS_00007165	MTCONS_00007158	NC_003280.10	6299490	6301454	1387	+	NC_003280.10	6270372	6279652	6975	+	*	-0.9002	-0.669	0.22	4.54	0.09	2.51	0.17	0.04	0.4	3.73	3.04	0	4.24	2.54	18.1	11.8	19.57	10.84	17.1	17.61	17.42	10.75	10.85	17.1	12.26	11.5
cis_mRNA_dw20k	19839	NA	LTCONS_00007165	NM_182120.4	NC_003280.10	6299490	6301454	1387	+	NC_003280.10	6277286	6279652	1899	+	*	0.667	0.704	0.22	4.54	0.09	2.51	0.17	0.04	0.4	3.73	3.04	0	4.24	2.54	5.26	4.7	1.07	4.05	1.11	3.62	2.94	4.07	4.07	2.26	6.18	5.08
cis_mRNA_dw20k	6961	NA	LTCONS_00007165	NM_062867.1	NC_003280.10	6299490	6301454	1387	+	NC_003280.10	6308414	6309282	597	-	*	0.8707	0.8392	0.22	4.54	0.09	2.51	0.17	0.04	0.4	3.73	3.04	0	4.24	2.54	0.93	2.66	0.91	2.07	1.31	0.55	1.3	2.91	1.57	1	1.88	2.25
cis_mRNA_up10k	2102	NA	LTCONS_00007165	NM_062866.5	NC_003280.10	6299490	6301454	1387	+	NC_003280.10	6303555	6306209	1152	+	*	0.8245	0.7413	0.22	4.54	0.09	2.51	0.17	0.04	0.4	3.73	3.04	0	4.24	2.54	21.48	51.89	10.14	68.63	19.77	8	19.44	41.67	66.87	10.26	62.29	72.8
cis_mRNA_up10k	5126	NA	LTCONS_00007165	MTCONS_00010254	NC_003280.10	6299490	6301454	1387	+	NC_003280.10	6290652	6294365	2207	-	*	0.9663	0.965	0.22	4.54	0.09	2.51	0.17	0.04	0.4	3.73	3.04	0	4.24	2.54	0.52	1.94	0.31	1.1	0.47	0.16	0.5	1.57	1	0.05	2.08	1.15
cis_mRNA_up10k	6967	NA	LTCONS_00007165	NM_062861.2	NC_003280.10	6299490	6301454	1387	+	NC_003280.10	6290652	6292524	1092	-	*	0.9482	0.7439	0.22	4.54	0.09	2.51	0.17	0.04	0.4	3.73	3.04	0	4.24	2.54	0	4.58	0.05	3.29	0	0	0	3.03	2.86	0.13	3.71	4.09
cis_mRNA_dw20k	4909	NA	LTCONS_00007173	MTCONS_00010273	NC_003280.10	6346881	6347668	788	+	NC_003280.10	6352576	6359001	4530	-	*	0.7647	0.7754	0.47	0.03	0.36	0.09	0.93	0.49	0.56	0.09	0.23	0.07	0.26	0.07	17.2	5.54	16.72	6	17.45	18.96	19.25	4.54	7.02	13.49	6.46	8.42
cis_mRNA_dw20k	5095	NA	LTCONS_00007173	NM_062878.3	NC_003280.10	6346881	6347668	788	+	NC_003280.10	6352762	6355911	2313	-	*	0.7306	0.6491	0.47	0.03	0.36	0.09	0.93	0.49	0.56	0.09	0.23	0.07	0.26	0.07	53.18	18.66	58.92	20.28	62.79	54.39	59.31	18.85	20.95	54.69	17.74	20.53
cis_mRNA_overlap	0	Lnc-AntiOverlap-mRNA	LTCONS_00007173	MTCONS_00010270	NC_003280.10	6346881	6347668	788	+	NC_003280.10	6343230	6347686	2227	-	-1392.85	0.8742	0.6456	0.47	0.03	0.36	0.09	0.93	0.49	0.56	0.09	0.23	0.07	0.26	0.07	115.93	65.36	127.55	69.57	190.19	87.82	146.49	60.96	66.61	97.78	63.54	69.65
cis_mRNA_overlap	0	Lnc-AntiOverlap-mRNA	LTCONS_00007173	NM_062876.5	NC_003280.10	6346881	6347668	788	+	NC_003280.10	6347263	6347686	372	-	-703.15	0.8169	0.6211	0.47	0.03	0.36	0.09	0.93	0.49	0.56	0.09	0.23	0.07	0.26	0.07	66.08	43.94	82.43	36.65	127.87	45.3	67.65	47.23	35.36	58	42.92	18.87
cis_mRNA_dw20k	2442	NA	LTCONS_00007182	NM_062884.5	NC_003280.10	6376353	6377322	970	+	NC_003280.10	6371313	6373912	1998	+	*	0.7473	0.6502	0.14	0.02	0.08	0.05	0.62	0.08	0.36	0.05	0.13	0	0.08	0.13	46.47	34.08	64.78	30.65	72.48	42.1	67.76	28.5	34.33	44.67	34.09	35.27
cis_mRNA_dw20k	3558	NA	LTCONS_00007183	NM_062884.5	NC_003280.10	6377469	6378116	648	+	NC_003280.10	6371313	6373912	1998	+	*	0.7239	0.8415	0.19	0.04	0.05	0	0.96	0.09	0.27	0	0.08	0.09	0	0	46.47	34.08	64.78	30.65	72.48	42.1	67.76	28.5	34.33	44.67	34.09	35.27
cis_mRNA_dw20k	17995	NA	LTCONS_00007211	NM_001027206.1	NC_003280.10	6506744	6509929	2847	+	NC_003280.10	6487444	6488750	1026	+	*	0.9397	0.9037	0.82	2.76	0.34	1.62	0.11	0.36	0.35	1.39	2.46	0.3	2.89	1.76	0.95	2.9	0.25	2.32	0.25	0.22	0.59	2.62	2.97	0	5.08	2.02
cis_mRNA_dw20k	19030	NA	LTCONS_00007211	NM_062919.3	NC_003280.10	6506744	6509929	2847	+	NC_003280.10	6528958	6531566	1788	-	*	0.8822	0.819	0.82	2.76	0.34	1.62	0.11	0.36	0.35	1.39	2.46	0.3	2.89	1.76	0.21	0.43	0.13	0.29	0.2	0.06	0.21	0.2	0.47	0.06	0.5	0.51
cis_mRNA_dw20k	2169	NA	LTCONS_00007211	NM_062914.1	NC_003280.10	6506744	6509929	2847	+	NC_003280.10	6503168	6504576	594	+	*	0.8168	0.8219	0.82	2.76	0.34	1.62	0.11	0.36	0.35	1.39	2.46	0.3	2.89	1.76	0.05	0.45	0	0.4	0.05	0	0.1	0.35	0.23	0	0.51	0.63
cis_mRNA_dw20k	7483	NA	LTCONS_00007211	NM_001026872.2	NC_003280.10	6506744	6509929	2847	+	NC_003280.10	6517411	6519661	1824	-	*	-0.8702	-0.6713	0.82	2.76	0.34	1.62	0.11	0.36	0.35	1.39	2.46	0.3	2.89	1.76	62.07	20	64.22	20.92	55.01	67.95	55.98	19.97	24.34	65.85	22.02	23.07
cis_mRNA_overlap	0	Lnc-AntiOverlap-mRNA	LTCONS_00007211	MTCONS_00010306	NC_003280.10	6506744	6509929	2847	+	NC_003280.10	6507697	6514016	4290	-	-3354.44	0.9114	0.8441	0.82	2.76	0.34	1.62	0.11	0.36	0.35	1.39	2.46	0.3	2.89	1.76	0.35	0.9	0.07	0.36	0.35	0.1	0.17	0.27	0.68	0.09	0.83	0.41
cis_mRNA_overlap	0	Lnc-AntiOverlap-mRNA	LTCONS_00007211	NM_062915.4	NC_003280.10	6506744	6509929	2847	+	NC_003280.10	6509707	6513983	2667	-	*	0.6303	0.7396	0.82	2.76	0.34	1.62	0.11	0.36	0.35	1.39	2.46	0.3	2.89	1.76	0.02	0.31	0	0.49	0	0	0.05	0	0.37	0	0.28	0.82
cis_mRNA_up10k	5227	NA	LTCONS_00007211	NM_062913.2	NC_003280.10	6506744	6509929	2847	+	NC_003280.10	6500644	6501518	693	-	*	-0.8393	-0.7483	0.82	2.76	0.34	1.62	0.11	0.36	0.35	1.39	2.46	0.3	2.89	1.76	40.56	4.89	36.35	7.18	30.7	57.82	34.15	7.42	8.12	47.4	5.93	7.79
cis_mRNA_up10k	6484	NA	LTCONS_00007211	NM_001267188.1	NC_003280.10	6506744	6509929	2847	+	NC_003280.10	6499119	6500261	576	-	*	0.6872	0.6854	0.82	2.76	0.34	1.62	0.11	0.36	0.35	1.39	2.46	0.3	2.89	1.76	0.05	0.19	0.05	0.28	0.11	0.21	0.21	0.18	0.24	0.11	0.38	0.25
cis_mRNA_up10k	6648	NA	LTCONS_00007211	NM_001026873.2	NC_003280.10	6506744	6509929	2847	+	NC_003280.10	6516576	6516857	282	+	*	0.8687	0.8919	0.82	2.76	0.34	1.62	0.11	0.36	0.35	1.39	2.46	0.3	2.89	1.76	0.67	0.96	0	0.39	0	0	0	0.62	0.71	0	1.24	0.15
cis_mRNA_dw20k	19030	NA	LTCONS_00007212	NM_062919.3	NC_003280.10	6506744	6509929	1747	+	NC_003280.10	6528958	6531566	1788	-	*	0.6124	0.7233	0	0.13	0	0.05	0.02	0.01	0.04	0.02	0.02	0	0.06	0.04	0.21	0.43	0.13	0.29	0.2	0.06	0.21	0.2	0.47	0.06	0.5	0.51
cis_mRNA_dw20k	2169	NA	LTCONS_00007212	NM_062914.1	NC_003280.10	6506744	6509929	1747	+	NC_003280.10	6503168	6504576	594	+	*	0.6619	0.8531	0	0.13	0	0.05	0.02	0.01	0.04	0.02	0.02	0	0.06	0.04	0.05	0.45	0	0.4	0.05	0	0.1	0.35	0.23	0	0.51	0.63
cis_mRNA_dw20k	7483	NA	LTCONS_00007212	NM_001026872.2	NC_003280.10	6506744	6509929	1747	+	NC_003280.10	6517411	6519661	1824	-	*	-0.6398	-0.7568	0	0.13	0	0.05	0.02	0.01	0.04	0.02	0.02	0	0.06	0.04	62.07	20	64.22	20.92	55.01	67.95	55.98	19.97	24.34	65.85	22.02	23.07
cis_mRNA_overlap	0	Lnc-AntiOverlap-mRNA	LTCONS_00007212	MTCONS_00010306	NC_003280.10	6506744	6509929	1747	+	NC_003280.10	6507697	6514016	4290	-	-3198.57	0.7539	0.7723	0	0.13	0	0.05	0.02	0.01	0.04	0.02	0.02	0	0.06	0.04	0.35	0.9	0.07	0.36	0.35	0.1	0.17	0.27	0.68	0.09	0.83	0.41
cis_mRNA_up10k	5227	NA	LTCONS_00007212	NM_062913.2	NC_003280.10	6506744	6509929	1747	+	NC_003280.10	6500644	6501518	693	-	*	-0.626	-0.8704	0	0.13	0	0.05	0.02	0.01	0.04	0.02	0.02	0	0.06	0.04	40.56	4.89	36.35	7.18	30.7	57.82	34.15	7.42	8.12	47.4	5.93	7.79
cis_mRNA_dw20k	12960	NA	LTCONS_00007213	MTCONS_00007208	NC_003280.10	6506762	6509929	3168	+	NC_003280.10	6490169	6493803	2569	+	*	-0.7463	-0.6643	1.03	6.37	1.18	3.83	1.36	0.84	1.56	3.99	3.86	0.95	6.86	4.95	207.59	178.8	201.66	160.1	204.48	228.46	223.05	162.17	168.16	192.89	173.9	166.22
cis_mRNA_dw20k	18013	NA	LTCONS_00007213	NM_001027206.1	NC_003280.10	6506762	6509929	3168	+	NC_003280.10	6487444	6488750	1026	+	*	0.9257	0.8792	1.03	6.37	1.18	3.83	1.36	0.84	1.56	3.99	3.86	0.95	6.86	4.95	0.95	2.9	0.25	2.32	0.25	0.22	0.59	2.62	2.97	0	5.08	2.02
cis_mRNA_dw20k	19030	NA	LTCONS_00007213	NM_062919.3	NC_003280.10	6506762	6509929	3168	+	NC_003280.10	6528958	6531566	1788	-	*	0.8666	0.8295	1.03	6.37	1.18	3.83	1.36	0.84	1.56	3.99	3.86	0.95	6.86	4.95	0.21	0.43	0.13	0.29	0.2	0.06	0.21	0.2	0.47	0.06	0.5	0.51
cis_mRNA_dw20k	2187	NA	LTCONS_00007213	NM_062914.1	NC_003280.10	6506762	6509929	3168	+	NC_003280.10	6503168	6504576	594	+	*	0.9227	0.9313	1.03	6.37	1.18	3.83	1.36	0.84	1.56	3.99	3.86	0.95	6.86	4.95	0.05	0.45	0	0.4	0.05	0	0.1	0.35	0.23	0	0.51	0.63
cis_mRNA_dw20k	7483	NA	LTCONS_00007213	NM_001026872.2	NC_003280.10	6506762	6509929	3168	+	NC_003280.10	6517411	6519661	1824	-	*	-0.9101	-0.8741	1.03	6.37	1.18	3.83	1.36	0.84	1.56	3.99	3.86	0.95	6.86	4.95	62.07	20	64.22	20.92	55.01	67.95	55.98	19.97	24.34	65.85	22.02	23.07
cis_mRNA_overlap	0	Lnc-AntiOverlap-mRNA	LTCONS_00007213	MTCONS_00010306	NC_003280.10	6506762	6509929	3168	+	NC_003280.10	6507697	6514016	4290	-	-3354.44	0.8548	0.8056	1.03	6.37	1.18	3.83	1.36	0.84	1.56	3.99	3.86	0.95	6.86	4.95	0.35	0.9	0.07	0.36	0.35	0.1	0.17	0.27	0.68	0.09	0.83	0.41
cis_mRNA_overlap	0	Lnc-AntiOverlap-mRNA	LTCONS_00007213	NM_062915.4	NC_003280.10	6506762	6509929	3168	+	NC_003280.10	6509707	6513983	2667	-	*	0.6535	0.6381	1.03	6.37	1.18	3.83	1.36	0.84	1.56	3.99	3.86	0.95	6.86	4.95	0.02	0.31	0	0.49	0	0	0.05	0	0.37	0	0.28	0.82
cis_mRNA_up10k	5245	NA	LTCONS_00007213	NM_062913.2	NC_003280.10	6506762	6509929	3168	+	NC_003280.10	6500644	6501518	693	-	*	-0.8884	-0.9371	1.03	6.37	1.18	3.83	1.36	0.84	1.56	3.99	3.86	0.95	6.86	4.95	40.56	4.89	36.35	7.18	30.7	57.82	34.15	7.42	8.12	47.4	5.93	7.79
cis_mRNA_up10k	6648	NA	LTCONS_00007213	NM_001026873.2	NC_003280.10	6506762	6509929	3168	+	NC_003280.10	6516576	6516857	282	+	*	0.7789	0.7251	1.03	6.37	1.18	3.83	1.36	0.84	1.56	3.99	3.86	0.95	6.86	4.95	0.67	0.96	0	0.39	0	0	0	0.62	0.71	0	1.24	0.15
cis_mRNA_up10k	8206	NA	LTCONS_00007213	NM_001027097.6	NC_003280.10	6506762	6509929	3168	+	NC_003280.10	6493863	6498557	1014	-	*	0.6181	0.662	1.03	6.37	1.18	3.83	1.36	0.84	1.56	3.99	3.86	0.95	6.86	4.95	3.38	3.82	0.35	4.29	2.88	1.59	4.84	2.87	3.82	1.15	4.53	4.86
cis_mRNA_dw20k	18927	NA	LTCONS_00007214	NM_001027206.1	NC_003280.10	6507676	6509929	1834	+	NC_003280.10	6487444	6488750	1026	+	*	0.8951	0.7982	0.28	2.27	0.28	1.18	0.08	0.38	0.29	1.12	0.84	0.2	2.34	1.33	0.95	2.9	0.25	2.32	0.25	0.22	0.59	2.62	2.97	0	5.08	2.02
cis_mRNA_dw20k	19030	NA	LTCONS_00007214	NM_062919.3	NC_003280.10	6507676	6509929	1834	+	NC_003280.10	6528958	6531566	1788	-	*	0.7711	0.7342	0.28	2.27	0.28	1.18	0.08	0.38	0.29	1.12	0.84	0.2	2.34	1.33	0.21	0.43	0.13	0.29	0.2	0.06	0.21	0.2	0.47	0.06	0.5	0.51
cis_mRNA_dw20k	3101	NA	LTCONS_00007214	NM_062914.1	NC_003280.10	6507676	6509929	1834	+	NC_003280.10	6503168	6504576	594	+	*	0.8672	0.864	0.28	2.27	0.28	1.18	0.08	0.38	0.29	1.12	0.84	0.2	2.34	1.33	0.05	0.45	0	0.4	0.05	0	0.1	0.35	0.23	0	0.51	0.63
cis_mRNA_dw20k	7483	NA	LTCONS_00007214	NM_001026872.2	NC_003280.10	6507676	6509929	1834	+	NC_003280.10	6517411	6519661	1824	-	*	-0.8254	-0.718	0.28	2.27	0.28	1.18	0.08	0.38	0.29	1.12	0.84	0.2	2.34	1.33	62.07	20	64.22	20.92	55.01	67.95	55.98	19.97	24.34	65.85	22.02	23.07
cis_mRNA_overlap	0	Lnc-AntiOverlap-mRNA	LTCONS_00007214	MTCONS_00010306	NC_003280.10	6507676	6509929	1834	+	NC_003280.10	6507697	6514016	4290	-	-3475.7	0.8306	0.7281	0.28	2.27	0.28	1.18	0.08	0.38	0.29	1.12	0.84	0.2	2.34	1.33	0.35	0.9	0.07	0.36	0.35	0.1	0.17	0.27	0.68	0.09	0.83	0.41
cis_mRNA_up10k	6159	NA	LTCONS_00007214	NM_062913.2	NC_003280.10	6507676	6509929	1834	+	NC_003280.10	6500644	6501518	693	-	*	-0.7841	-0.7951	0.28	2.27	0.28	1.18	0.08	0.38	0.29	1.12	0.84	0.2	2.34	1.33	40.56	4.89	36.35	7.18	30.7	57.82	34.15	7.42	8.12	47.4	5.93	7.79
cis_mRNA_up10k	6648	NA	LTCONS_00007214	NM_001026873.2	NC_003280.10	6507676	6509929	1834	+	NC_003280.10	6516576	6516857	282	+	*	0.8015	0.7191	0.28	2.27	0.28	1.18	0.08	0.38	0.29	1.12	0.84	0.2	2.34	1.33	0.67	0.96	0	0.39	0	0	0	0.62	0.71	0	1.24	0.15
cis_mRNA_up10k	7416	NA	LTCONS_00007214	NM_001267188.1	NC_003280.10	6507676	6509929	1834	+	NC_003280.10	6499119	6500261	576	-	*	0.7045	0.7641	0.28	2.27	0.28	1.18	0.08	0.38	0.29	1.12	0.84	0.2	2.34	1.33	0.05	0.19	0.05	0.28	0.11	0.21	0.21	0.18	0.24	0.11	0.38	0.25
cis_mRNA_dw20k	16365	NA	LTCONS_00007216	NM_062914.1	NC_003280.10	6520940	6523479	2540	+	NC_003280.10	6503168	6504576	594	+	*	0.8253	0.8319	0.12	0.29	0.11	0.35	0.09	0.1	0.11	0.2	0.29	0.04	0.36	0.23	0.05	0.45	0	0.4	0.05	0	0.1	0.35	0.23	0	0.51	0.63
cis_mRNA_dw20k	4084	NA	LTCONS_00007216	NM_001026873.2	NC_003280.10	6520940	6523479	2540	+	NC_003280.10	6516576	6516857	282	+	*	0.7558	0.8477	0.12	0.29	0.11	0.35	0.09	0.1	0.11	0.2	0.29	0.04	0.36	0.23	0.67	0.96	0	0.39	0	0	0	0.62	0.71	0	1.24	0.15
cis_mRNA_dw20k	5480	NA	LTCONS_00007216	NM_062919.3	NC_003280.10	6520940	6523479	2540	+	NC_003280.10	6528958	6531566	1788	-	*	0.8186	0.8307	0.12	0.29	0.11	0.35	0.09	0.1	0.11	0.2	0.29	0.04	0.36	0.23	0.21	0.43	0.13	0.29	0.2	0.06	0.21	0.2	0.47	0.06	0.5	0.51
cis_mRNA_up10k	1280	NA	LTCONS_00007216	NM_001026872.2	NC_003280.10	6520940	6523479	2540	+	NC_003280.10	6517411	6519661	1824	-	*	-0.8969	-0.7509	0.12	0.29	0.11	0.35	0.09	0.1	0.11	0.2	0.29	0.04	0.36	0.23	62.07	20	64.22	20.92	55.01	67.95	55.98	19.97	24.34	65.85	22.02	23.07
cis_mRNA_up10k	6925	NA	LTCONS_00007216	MTCONS_00010306	NC_003280.10	6520940	6523479	2540	+	NC_003280.10	6507697	6514016	4290	-	*	0.7868	0.8049	0.12	0.29	0.11	0.35	0.09	0.1	0.11	0.2	0.29	0.04	0.36	0.23	0.35	0.9	0.07	0.36	0.35	0.1	0.17	0.27	0.68	0.09	0.83	0.41
cis_mRNA_up10k	6958	NA	LTCONS_00007216	NM_062915.4	NC_003280.10	6520940	6523479	2540	+	NC_003280.10	6509707	6513983	2667	-	*	0.6817	0.775	0.12	0.29	0.11	0.35	0.09	0.1	0.11	0.2	0.29	0.04	0.36	0.23	0.02	0.31	0	0.49	0	0	0.05	0	0.37	0	0.28	0.82
cis_mRNA_dw20k	1468	NA	LTCONS_00007229	MTCONS_00007227	NC_003280.10	6592548	6593337	790	+	NC_003280.10	6588740	6591081	1032	+	*	0.7977	0.7198	0.07	0	0	0	0.68	0	0.25	0	0	0.04	0	0	244.52	142.89	280.95	151.5	373	220.69	306.91	123.67	152.35	219.58	152.55	156.26
cis_mRNA_dw20k	15832	NA	LTCONS_00007307	NM_001026717.4	NC_003280.10	6884585	6887183	2548	+	NC_003280.10	6903014	6907757	1455	-	*	0.8404	0.8741	0.25	0.3	0.11	0.61	0.09	0.17	0.22	0.14	0.42	0.13	0.29	0.59	4.37	4.99	3.18	6.17	3.77	3.85	4.64	4.67	6.71	3.79	7.13	8.67
cis_mRNA_dw20k	7135	NA	LTCONS_00007307	NM_063009.5	NC_003280.10	6884585	6887183	2548	+	NC_003280.10	6894317	6897531	2688	-	*	0.8411	0.8462	0.25	0.3	0.11	0.61	0.09	0.17	0.22	0.14	0.42	0.13	0.29	0.59	11.7	9.77	7.79	12.19	8.01	10.73	9.76	7.76	12.85	8.52	12.7	17.25
cis_mRNA_overlap	0	Lnc-AntiOverlap-mRNA	LTCONS_00007307	NM_063007.4	NC_003280.10	6884585	6887183	2548	+	NC_003280.10	6884117	6887706	1986	-	-3118.44	0.8651	0.8881	0.25	0.3	0.11	0.61	0.09	0.17	0.22	0.14	0.42	0.13	0.29	0.59	9.14	12.35	5.87	15.49	5.62	6.94	8.37	9.52	15.56	6.24	17.57	19.37
cis_mRNA_up10k	4419	NA	LTCONS_00007307	NM_063005.3	NC_003280.10	6884585	6887183	2548	+	NC_003280.10	6879361	6880167	567	-	*	0.7808	0.8182	0.25	0.3	0.11	0.61	0.09	0.17	0.22	0.14	0.42	0.13	0.29	0.59	6.47	11.08	3.34	11.25	3.19	4.89	4.76	7.5	14.89	5.05	14.94	14.57
cis_mRNA_up10k	849	NA	LTCONS_00007307	NM_063006.5	NC_003280.10	6884585	6887183	2548	+	NC_003280.10	6880775	6883737	1998	-	-1745.43	0.9003	0.9301	0.25	0.3	0.11	0.61	0.09	0.17	0.22	0.14	0.42	0.13	0.29	0.59	5.88	11.81	1.53	17.9	2.77	5.14	4.46	10.2	17.5	4.04	14.71	21.48
cis_mRNA_dw20k	18656	NA	LTCONS_00007308	MTCONS_00010390	NC_003280.10	6893978	6898355	4378	+	NC_003280.10	6917010	6919223	1476	-	*	0.7777	0.6993	1.16	1.42	1.06	1.2	0.63	1.18	0.78	1.05	1.3	0.75	1.55	1.84	1.01	13.54	0.24	8.28	0.38	0.04	0.5	9.86	8.88	0.13	14.07	12.31
cis_mRNA_dw20k	4660	NA	LTCONS_00007308	NM_001026717.4	NC_003280.10	6893978	6898355	4378	+	NC_003280.10	6903014	6907757	1455	-	*	0.806	0.8182	1.16	1.42	1.06	1.2	0.63	1.18	0.78	1.05	1.3	0.75	1.55	1.84	4.37	4.99	3.18	6.17	3.77	3.85	4.64	4.67	6.71	3.79	7.13	8.67
cis_mRNA_overlap	0	mRNA-AntiCompleteIn-LncExon	LTCONS_00007308	NM_063009.5	NC_003280.10	6893978	6898355	4378	+	NC_003280.10	6894317	6897531	2688	-	-4954.48	0.8137	0.8042	1.16	1.42	1.06	1.2	0.63	1.18	0.78	1.05	1.3	0.75	1.55	1.84	11.7	9.77	7.79	12.19	8.01	10.73	9.76	7.76	12.85	8.52	12.7	17.25
cis_mRNA_up10k	397	NA	LTCONS_00007308	NM_063010.4	NC_003280.10	6893978	6898355	4378	+	NC_003280.10	6898751	6901594	1794	+	*	-0.699	-0.6434	1.16	1.42	1.06	1.2	0.63	1.18	0.78	1.05	1.3	0.75	1.55	1.84	31.72	24.99	39.03	25.19	37.21	30.77	33.72	22.99	24.37	31.47	23.65	23.57
cis_mRNA_up10k	6273	NA	LTCONS_00007308	NM_063007.4	NC_003280.10	6893978	6898355	4378	+	NC_003280.10	6884117	6887706	1986	-	*	0.8494	0.8671	1.16	1.42	1.06	1.2	0.63	1.18	0.78	1.05	1.3	0.75	1.55	1.84	9.14	12.35	5.87	15.49	5.62	6.94	8.37	9.52	15.56	6.24	17.57	19.37
cis_mRNA_up10k	4537	NA	LTCONS_00007315	NM_001026935.4	NC_003280.10	6924298	6924777	480	+	NC_003280.10	6929313	6946946	2124	+	*	0.7387	0.754	0.07	0.6	0.27	0.06	0.2	0.2	0.34	0.29	0.25	0.42	0.37	0.45	0	1.73	0	0	0	0	0	0	0	0.41	0	0.33
cis_mRNA_up10k	3659	NA	LTCONS_00007316	MTCONS_00007327	NC_003280.10	6925212	6925655	444	+	NC_003280.10	6929313	6947895	2810	+	*	-0.6027	-0.7018	0.24	0.74	0.45	0.2	0.23	0.15	0.67	0.51	0.21	0.16	0.34	0.72	0.07	0	0	0.05	0.19	0.15	0	0	0	0.06	0	0
cis_mRNA_dw20k	19873	NA	LTCONS_00007340	MTCONS_00007331	NC_003280.10	6974601	6977319	2674	+	NC_003280.10	6949468	6954729	4235	+	*	0.9309	0.7812	0.61	0.31	0.36	0.18	1.13	0.21	0.87	0.2	0.26	0.2	0.24	0.33	0.08	0	0	0	0.15	0	0.11	0	0.06	0	0	0.04
cis_mRNA_dw20k	19873	NA	LTCONS_00007340	MTCONS_00007336	NC_003280.10	6974601	6977319	2674	+	NC_003280.10	6951479	6954729	2227	+	*	0.8737	0.7601	0.61	0.31	0.36	0.18	1.13	0.21	0.87	0.2	0.26	0.2	0.24	0.33	6.19	6.02	7.22	3.71	12.15	7.48	13.26	3.51	5.96	5.08	3.63	5.69
cis_mRNA_dw20k	19667	NA	LTCONS_00007375	NM_063055.4	NC_003280.10	7096730	7097241	512	+	NC_003280.10	7075627	7077064	1173	+	*	-0.6709	-0.7123	0.45	0.17	0.74	0.11	0.86	0.12	0.43	0	0.28	0.19	0.11	0.12	38.03	64.67	34.66	74.07	27.22	35.32	30.63	58.16	67.32	35.89	70.67	68.86
cis_mRNA_overlap	0	Lnc-CompleteIn-mRNAIntron	LTCONS_00007375	NM_063061.2	NC_003280.10	7096730	7097241	512	+	NC_003280.10	7094277	7099284	1476	+	*	0.8177	0.7825	0.45	0.17	0.74	0.11	0.86	0.12	0.43	0	0.28	0.19	0.11	0.12	2.46	0.23	1.59	0.14	2.42	0.58	2.27	0.18	0.19	0.91	0.33	0.28
cis_mRNA_up10k	8329	NA	LTCONS_00007375	NM_063067.3	NC_003280.10	7096730	7097241	512	+	NC_003280.10	7105569	7106257	375	+	*	-0.712	-0.6667	0.45	0.17	0.74	0.11	0.86	0.12	0.43	0	0.28	0.19	0.11	0.12	1007.19	1300.84	848.73	1603.93	809.49	982.51	1084.3	1355.44	1585.54	1046.81	1387.44	1522.99
cis_mRNA_dw20k	13022	NA	LTCONS_00007376	MTCONS_00007370	NC_003280.10	7097345	7097868	524	+	NC_003280.10	7083009	7084324	1129	+	*	-0.6193	-0.627	0.68	0	0.72	0.21	0.9	0.24	0.42	0.05	0.11	0.12	0.05	0.46	11.53	20.62	11.99	9.11	6.08	11.97	8.75	17	9.28	10.96	17.05	8.11
cis_mRNA_dw20k	4244	NA	LTCONS_00007376	NM_171018.4	NC_003280.10	7097345	7097868	524	+	NC_003280.10	7089674	7093102	1032	+	*	0.6051	0.6561	0.68	0	0.72	0.21	0.9	0.24	0.42	0.05	0.11	0.12	0.05	0.46	0.96	0.07	0.49	0.09	0.6	0.46	1.28	0.07	0.1	0.16	0.12	0.07
cis_mRNA_overlap	0	Lnc-CompleteIn-mRNAIntron	LTCONS_00007376	NM_063061.2	NC_003280.10	7097345	7097868	524	+	NC_003280.10	7094277	7099284	1476	+	*	0.8178	0.7005	0.68	0	0.72	0.21	0.9	0.24	0.42	0.05	0.11	0.12	0.05	0.46	2.46	0.23	1.59	0.14	2.42	0.58	2.27	0.18	0.19	0.91	0.33	0.28
cis_mRNA_dw20k	15722	NA	LTCONS_00007377	NM_063073.5	NC_003280.10	7102654	7104968	2270	+	NC_003280.10	7120689	7121548	720	-	*	-0.7384	-0.6853	0.32	2.67	0.14	3.27	0.15	0.08	0.12	0.51	3.65	0.02	3.13	4.12	11.34	5.49	12.36	4.92	11.27	6.42	10.68	6.87	6.12	7.53	5.67	5.09
cis_mRNA_dw20k	3371	NA	LTCONS_00007377	NM_063061.2	NC_003280.10	7102654	7104968	2270	+	NC_003280.10	7094277	7099284	1476	+	*	-0.675	-0.6224	0.32	2.67	0.14	3.27	0.15	0.08	0.12	0.51	3.65	0.02	3.13	4.12	2.46	0.23	1.59	0.14	2.42	0.58	2.27	0.18	0.19	0.91	0.33	0.28
cis_mRNA_dw20k	8827	NA	LTCONS_00007377	NM_063071.1	NC_003280.10	7102654	7104968	2270	+	NC_003280.10	7113794	7115874	1314	-	*	0.9231	0.8322	0.32	2.67	0.14	3.27	0.15	0.08	0.12	0.51	3.65	0.02	3.13	4.12	0.14	0.62	0.18	1.02	0.36	0.12	0.47	0.26	0.98	0.04	1.21	1
cis_mRNA_dw20k	9553	NA	LTCONS_00007377	NM_171018.4	NC_003280.10	7102654	7104968	2270	+	NC_003280.10	7089674	7093102	1032	+	*	-0.6169	-0.6549	0.32	2.67	0.14	3.27	0.15	0.08	0.12	0.51	3.65	0.02	3.13	4.12	0.96	0.07	0.49	0.09	0.6	0.46	1.28	0.07	0.1	0.16	0.12	0.07
cis_mRNA_overlap	0	Lnc-AntiOverlap-mRNA	LTCONS_00007377	NM_001346630.1	NC_003280.10	7102654	7104968	2270	+	NC_003280.10	7101533	7105001	2937	-	-3880.05	-0.8911	-0.9021	0.32	2.67	0.14	3.27	0.15	0.08	0.12	0.51	3.65	0.02	3.13	4.12	47.88	20.91	53.86	17.62	46.39	49.69	47.52	24.54	20.68	52.13	21.37	19.63
cis_mRNA_up10k	602	NA	LTCONS_00007377	NM_063067.3	NC_003280.10	7102654	7104968	2270	+	NC_003280.10	7105569	7106257	375	+	*	0.8801	0.7902	0.32	2.67	0.14	3.27	0.15	0.08	0.12	0.51	3.65	0.02	3.13	4.12	1007.19	1300.84	848.73	1603.93	809.49	982.51	1084.3	1355.44	1585.54	1046.81	1387.44	1522.99
cis_mRNA_up10k	7025	NA	LTCONS_00007377	NM_063069.3	NC_003280.10	7102654	7104968	2270	+	NC_003280.10	7111992	7112845	663	+	*	-0.8245	-0.7483	0.32	2.67	0.14	3.27	0.15	0.08	0.12	0.51	3.65	0.02	3.13	4.12	122.87	98	147.26	89.31	151.64	121.34	131.16	103.9	89.71	118.86	90.05	97
cis_mRNA_up10k	8117	NA	LTCONS_00007377	NM_063070.1	NC_003280.10	7102654	7104968	2270	+	NC_003280.10	7113084	7113592	462	+	*	-0.7845	-0.7063	0.32	2.67	0.14	3.27	0.15	0.08	0.12	0.51	3.65	0.02	3.13	4.12	29.44	21.66	35.04	22.33	29.31	27.89	25.84	27.14	21.03	27.98	24.34	23.94
cis_mRNA_dw20k	249	NA	LTCONS_00007409	MTCONS_00010479	NC_003280.10	7238612	7249978	9148	+	NC_003280.10	7250226	7253292	1959	-	*	-0.8021	-0.7266	0.14	0.6	0.08	0.69	0.06	0.14	0.14	0.59	0.99	0.05	0.56	1.34	32.88	20.5	38.18	24.45	34.85	36.69	36.69	20.21	22.73	32.97	23.34	23.25
cis_mRNA_dw20k	2778	NA	LTCONS_00007409	NM_063108.5	NC_003280.10	7238612	7249978	9148	+	NC_003280.10	7232854	7235835	1725	+	*	0.935	0.9155	0.14	0.6	0.08	0.69	0.06	0.14	0.14	0.59	0.99	0.05	0.56	1.34	9.29	42.15	2.8	68.82	1.62	13.55	4.09	38.54	62.83	7.17	57.95	75.96
cis_mRNA_overlap	0	Lnc-Overlap-mRNA	LTCONS_00007409	NM_063110.4	NC_003280.10	7238612	7249978	9148	+	NC_003280.10	7245918	7249978	3003	+	-1116.03	0.9441	0.9366	0.14	0.6	0.08	0.69	0.06	0.14	0.14	0.59	0.99	0.05	0.56	1.34	0.44	10.13	0.71	11.18	0.21	0.49	0.33	9.59	11.07	0.26	7.86	13.68
cis_mRNA_overlap	0	mRNA-CompleteIn-LncExon	LTCONS_00007409	NM_063111.4	NC_003280.10	7238612	7249978	9148	+	NC_003280.10	7245918	7249978	2580	+	-1035.59	0.88	0.7958	0.14	0.6	0.08	0.69	0.06	0.14	0.14	0.59	0.99	0.05	0.56	1.34	5.61	30.05	1.91	42.03	2.03	6.4	2.98	49.07	42.65	6.5	40.31	45.89
cis_mRNA_up10k	1839	NA	LTCONS_00007409	MTCONS_00007414	NC_003280.10	7238612	7249978	9148	+	NC_003280.10	7251816	7255746	2719	+	*	-0.7419	-0.662	0.14	0.6	0.08	0.69	0.06	0.14	0.14	0.59	0.99	0.05	0.56	1.34	15.01	6.98	19.61	6.34	13.95	18.24	15.25	6.15	6.37	12.62	7.02	8.81
cis_mRNA_up10k	2585	NA	LTCONS_00007409	NM_001026962.2	NC_003280.10	7238612	7249978	9148	+	NC_003280.10	7252562	7255516	1791	+	*	-0.8567	-0.9155	0.14	0.6	0.08	0.69	0.06	0.14	0.14	0.59	0.99	0.05	0.56	1.34	52.19	24.45	64.32	22.77	62.34	48.23	51.34	23.57	23.68	55.4	25.31	23.25
cis_mRNA_up10k	281	NA	LTCONS_00007409	NM_063109.5	NC_003280.10	7238612	7249978	9148	+	NC_003280.10	7235928	7238332	915	-	*	0.7018	0.7183	0.14	0.6	0.08	0.69	0.06	0.14	0.14	0.59	0.99	0.05	0.56	1.34	21.96	26.46	11.27	40	12.19	36.6	23.11	36.4	36.97	32.48	30.99	43.16
cis_mRNA_up10k	7045	NA	LTCONS_00007409	MTCONS_00007418	NC_003280.10	7238612	7249978	9148	+	NC_003280.10	7257022	7258846	1158	+	*	0.9215	0.9014	0.14	0.6	0.08	0.69	0.06	0.14	0.14	0.59	0.99	0.05	0.56	1.34	12.96	23.97	11.8	31.67	14.14	9.07	17.11	21.06	31.56	7.9	31.33	37.38
cis_mRNA_up10k	7045	NA	LTCONS_00007409	NM_063115.2	NC_003280.10	7238612	7249978	9148	+	NC_003280.10	7257022	7258112	774	+	*	0.6022	0.6052	0.14	0.6	0.08	0.69	0.06	0.14	0.14	0.59	0.99	0.05	0.56	1.34	0.1	0.39	0	0	0	0	0.31	0	0.35	0	0.16	0.36
cis_mRNA_dw20k	102	NA	LTCONS_00007429	NM_001267194.1	NC_003280.10	7313357	7314171	815	+	NC_003280.10	7310375	7313256	831	+	*	0.6547	0.7622	2.77	1.41	2.42	1.06	2.1	3.21	4.67	0.84	1.73	2.44	1.66	3.04	34.48	24.5	35.65	22.69	40.44	36.66	37.25	21.56	22.93	36.11	23.43	24.61
cis_mRNA_dw20k	4930	NA	LTCONS_00007429	NM_001322739.1	NC_003280.10	7313357	7314171	815	+	NC_003280.10	7305871	7308428	2241	+	*	0.6053	0.7343	2.77	1.41	2.42	1.06	2.1	3.21	4.67	0.84	1.73	2.44	1.66	3.04	37.7	19.17	38.32	14.88	29.99	46.24	32.69	17.44	16.16	43.9	16.46	20.05
cis_mRNA_dw20k	7828	NA	LTCONS_00007429	NM_063124.5	NC_003280.10	7313357	7314171	815	+	NC_003280.10	7302111	7305530	2523	+	*	0.6693	0.7762	2.77	1.41	2.42	1.06	2.1	3.21	4.67	0.84	1.73	2.44	1.66	3.04	54.89	24.88	64.87	23.24	52.96	52.68	56.33	22.22	26.32	51.96	28.13	28.44
cis_mRNA_up10k	3256	NA	LTCONS_00007429	NM_063127.4	NC_003280.10	7313357	7314171	815	+	NC_003280.10	7309356	7310102	594	-	*	0.6213	0.6853	2.77	1.41	2.42	1.06	2.1	3.21	4.67	0.84	1.73	2.44	1.66	3.04	34.85	22.8	45.19	22.77	44.31	34.91	41.44	20.23	24.11	30.55	26.8	25.18
cis_mRNA_dw20k	17339	NA	LTCONS_00007449	NM_063153.4	NC_003280.10	7391490	7393851	2362	+	NC_003280.10	7411189	7411904	276	-	*	0.627	0.7053	1.02	1.56	0.87	1.09	1.55	0.7	1.73	0.82	1.08	0.41	1.54	1.28	0.35	1.42	0.16	0.67	1.26	0.31	0.49	0.51	1.18	0.16	0.71	1.26
cis_mRNA_dw20k	16295	NA	LTCONS_00007462	NM_001026877.2	NC_003280.10	7470892	7471948	1057	+	NC_003280.10	7488242	7489661	1059	-	*	0.7301	0.6935	0.18	0.66	0.33	0.2	0.28	0.37	0.25	0.31	0.37	0.03	0.51	0.48	0.69	7.7	0.59	3.98	0.28	0.37	0	5.61	4.44	0.23	7.24	5.25
cis_mRNA_dw20k	6004	NA	LTCONS_00007470	MTCONS_00007466	NC_003280.10	7503282	7504338	1057	+	NC_003280.10	7494185	7497279	1648	+	*	0.6809	0.6783	5.17	1.69	1.46	9.84	5.84	1.2	6.58	1.38	7.95	0.88	2.08	9.75	3.83	3.01	2.67	3.74	4.15	1.67	4.12	2.26	3.92	1.52	4.35	3.87
cis_mRNA_dw20k	7188	NA	LTCONS_00007470	MTCONS_00007467	NC_003280.10	7503282	7504338	1057	+	NC_003280.10	7494448	7496095	926	+	*	0.741	0.8741	5.17	1.69	1.46	9.84	5.84	1.2	6.58	1.38	7.95	0.88	2.08	9.75	6.05	7.17	6.9	10.07	7.42	3.92	12.14	4.16	9.84	5.54	9.77	11.27
[truncated: 5,480 more rows]
