# Supplementary material for: The whole transcriptome regulation as a function of mitochondrial polymorphisms and aging in Caenorhabditis elegans
Source: Aging (Albany NY). 2020 Feb 4;12(3):2453–70. doi: 10.18632/aging.102754 (PMC7041728; doi:10.18632/aging.102754)
Supplement: Supplementary Table 5 [file aging-12-102754-s004..xlsx]

## Sheet: Top 1 ceRNA-miRNA-RNA-network
from	to
NM_061886.1	cel-miR-39-3p
NM_061886.1	cel-miR-36-3p
NM_061886.1	cel-miR-5548-5p
NM_061886.1	cel-miR-37-3p
NM_061886.1	cel-miR-42-3p
NM_061886.1	cel-miR-2211-5p
NM_061886.1	cel-miR-2221
NM_061886.1	cel-miR-35-3p
NM_061886.1	cel-miR-38-3p
NM_061886.1	cel-miR-41-3p
NM_061886.1	novel_mir30
NM_061886.1	novel_mir78
cel-miR-36-3p	LTCONS_00003309
cel-miR-37-3p	LTCONS_00003309
cel-miR-42-3p	LTCONS_00003309
cel-miR-2221	LTCONS_00003309
cel-miR-35-3p	LTCONS_00003309
cel-miR-38-3p	LTCONS_00003309
cel-miR-39-3p	NM_062083.3
cel-miR-39-3p	NM_066811.6
cel-miR-39-3p	NM_067266.3
cel-miR-39-3p	NM_001307629.1
cel-miR-39-3p	NM_001270021.1
cel-miR-39-3p	NM_076064.4
cel-miR-39-3p	MTCONS_00005990
cel-miR-39-3p	MTCONS_00011709
cel-miR-39-3p	MTCONS_00020905
cel-miR-39-3p	MTCONS_00017605
cel-miR-36-3p	NM_062083.3
cel-miR-36-3p	NM_066811.6
cel-miR-36-3p	NM_001307629.1
cel-miR-36-3p	NM_077479.2
cel-miR-36-3p	MTCONS_00005990
cel-miR-36-3p	MTCONS_00011709
cel-miR-36-3p	MTCONS_00020905
cel-miR-36-3p	MTCONS_00017605
cel-miR-5548-5p	NM_001307629.1
cel-miR-37-3p	NM_062083.3
cel-miR-37-3p	NM_066811.6
cel-miR-37-3p	NM_067266.3
cel-miR-37-3p	NM_001307629.1
cel-miR-37-3p	NM_001270021.1
cel-miR-37-3p	NM_076064.4
cel-miR-37-3p	NM_077479.2
cel-miR-37-3p	MTCONS_00005990
cel-miR-37-3p	MTCONS_00011709
cel-miR-37-3p	MTCONS_00020905
cel-miR-37-3p	MTCONS_00017605
cel-miR-42-3p	NM_062083.3
cel-miR-42-3p	NM_066811.6
cel-miR-42-3p	NM_001307629.1
cel-miR-42-3p	NM_001270021.1
cel-miR-42-3p	NM_076064.4
cel-miR-42-3p	NM_077479.2
cel-miR-42-3p	MTCONS_00005990
cel-miR-42-3p	MTCONS_00020905
cel-miR-2211-5p	NM_001307629.1
cel-miR-2221	MTCONS_00011709
cel-miR-35-3p	NM_062083.3
cel-miR-35-3p	NM_066811.6
cel-miR-35-3p	NM_067266.3
cel-miR-35-3p	NM_001307629.1
cel-miR-35-3p	NM_001270021.1
cel-miR-35-3p	NM_076064.4
cel-miR-35-3p	NM_077479.2
cel-miR-35-3p	MTCONS_00005990
cel-miR-35-3p	MTCONS_00020905
cel-miR-35-3p	MTCONS_00017605
cel-miR-38-3p	NM_066811.6
cel-miR-38-3p	NM_067266.3
cel-miR-38-3p	NM_001307629.1
cel-miR-38-3p	NM_001270021.1
cel-miR-38-3p	NM_076064.4
cel-miR-38-3p	MTCONS_00005990
cel-miR-38-3p	MTCONS_00011709
cel-miR-38-3p	MTCONS_00020905
cel-miR-38-3p	MTCONS_00017605
cel-miR-41-3p	NM_062083.3
cel-miR-41-3p	NM_066811.6
cel-miR-41-3p	NM_001307629.1
cel-miR-41-3p	NM_001270021.1
cel-miR-41-3p	MTCONS_00011709
cel-miR-41-3p	MTCONS_00020905
cel-miR-41-3p	MTCONS_00017605
novel_mir30	MTCONS_00011709
novel_mir78	MTCONS_00011709

## Sheet: Top 2 ceRNA-miRNA-RNA-network
from	to
NM_062070.2	cel-miR-39-3p
NM_062070.2	cel-miR-40-3p
NM_062070.2	cel-miR-36-3p
NM_062070.2	cel-miR-37-3p
NM_062070.2	cel-miR-42-3p
NM_062070.2	cel-miR-35-3p
NM_062070.2	cel-miR-37-5p
NM_062070.2	cel-miR-791-5p
NM_062070.2	cel-miR-38-3p
NM_062070.2	cel-miR-41-3p
cel-miR-40-3p	LTCONS_00017582
cel-miR-40-3p	LTCONS_00025766
cel-miR-36-3p	LTCONS_00017582
cel-miR-36-3p	LTCONS_00025766
cel-miR-37-3p	LTCONS_00025766
cel-miR-42-3p	LTCONS_00017582
cel-miR-42-3p	LTCONS_00025766
cel-miR-35-3p	LTCONS_00017582
cel-miR-35-3p	LTCONS_00025766
cel-miR-38-3p	LTCONS_00017582
cel-miR-39-3p	NM_001268843.2
cel-miR-39-3p	NM_001047451.2
cel-miR-39-3p	NM_001269203.1
cel-miR-39-3p	NM_074357.2
cel-miR-39-3p	NM_075738.2
cel-miR-39-3p	NM_001029712.2
cel-miR-39-3p	MTCONS_00007027
cel-miR-39-3p	MTCONS_00017605
cel-miR-40-3p	NM_001268843.2
cel-miR-40-3p	NM_001047451.2
cel-miR-40-3p	NM_001269203.1
cel-miR-40-3p	NM_074357.2
cel-miR-40-3p	NM_075738.2
cel-miR-40-3p	NM_077479.2
cel-miR-40-3p	MTCONS_00017605
cel-miR-36-3p	NM_063926.4
cel-miR-36-3p	NM_001268843.2
cel-miR-36-3p	NM_001047451.2
cel-miR-36-3p	NM_001269203.1
cel-miR-36-3p	NM_074357.2
cel-miR-36-3p	NM_075738.2
cel-miR-36-3p	NM_077479.2
cel-miR-36-3p	MTCONS_00007027
cel-miR-36-3p	MTCONS_00017605
cel-miR-37-3p	NM_001268843.2
cel-miR-37-3p	NM_001047451.2
cel-miR-37-3p	NM_001269203.1
cel-miR-37-3p	NM_074357.2
cel-miR-37-3p	NM_075738.2
cel-miR-37-3p	NM_001029712.2
cel-miR-37-3p	NM_077479.2
cel-miR-37-3p	MTCONS_00007027
cel-miR-37-3p	MTCONS_00017605
cel-miR-42-3p	NM_001268843.2
cel-miR-42-3p	NM_001047451.2
cel-miR-42-3p	NM_074357.2
cel-miR-42-3p	NM_001029712.2
cel-miR-42-3p	NM_077479.2
cel-miR-42-3p	MTCONS_00007027
cel-miR-35-3p	NM_063926.4
cel-miR-35-3p	NM_001268843.2
cel-miR-35-3p	NM_001047451.2
cel-miR-35-3p	NM_001269203.1
cel-miR-35-3p	NM_074357.2
cel-miR-35-3p	NM_075738.2
cel-miR-35-3p	NM_001029712.2
cel-miR-35-3p	NM_077479.2
cel-miR-35-3p	MTCONS_00007027
cel-miR-35-3p	MTCONS_00017605
cel-miR-37-5p	NM_001269203.1
cel-miR-37-5p	NM_077479.2
cel-miR-791-5p	NM_001269203.1
cel-miR-38-3p	NM_063926.4
cel-miR-38-3p	NM_001269203.1
cel-miR-38-3p	NM_074357.2
cel-miR-38-3p	NM_001029712.2
cel-miR-38-3p	MTCONS_00017605
cel-miR-41-3p	NM_063926.4
cel-miR-41-3p	NM_001268843.2
cel-miR-41-3p	NM_001047451.2
cel-miR-41-3p	NM_075738.2
cel-miR-41-3p	NM_001029712.2
cel-miR-41-3p	MTCONS_00017605

## Sheet: Top 3 ceRNA-miRNA-RNA-network
from	to
MTCONS_00017035	cel-miR-48-3p
MTCONS_00017035	cel-miR-39-3p
MTCONS_00017035	cel-miR-40-3p
MTCONS_00017035	cel-miR-264
MTCONS_00017035	cel-miR-36-3p
MTCONS_00017035	cel-miR-37-3p
MTCONS_00017035	cel-miR-1832a-3p
MTCONS_00017035	cel-miR-35-3p
MTCONS_00017035	cel-miR-42-5p
MTCONS_00017035	cel-miR-38-3p
MTCONS_00017035	cel-miR-2-5p
MTCONS_00017035	cel-miR-41-3p
MTCONS_00017035	novel_mir73
cel-miR-48-3p	NM_001306239.1
cel-miR-48-3p	NM_076793.1
cel-miR-39-3p	NM_001306239.1
cel-miR-39-3p	NM_058732.3
cel-miR-39-3p	NM_001026341.2
cel-miR-39-3p	NM_061525.3
cel-miR-39-3p	NM_171367.5
cel-miR-39-3p	NM_001307023.1
cel-miR-39-3p	NM_073858.4
cel-miR-39-3p	MTCONS_00013296
cel-miR-40-3p	NM_001306239.1
cel-miR-40-3p	NM_001026341.2
cel-miR-40-3p	NM_061525.3
cel-miR-40-3p	NM_062304.4
cel-miR-40-3p	NM_001312960.1
cel-miR-40-3p	NM_171367.5
cel-miR-40-3p	NM_001307023.1
cel-miR-40-3p	NM_073858.4
cel-miR-40-3p	MTCONS_00013296
cel-miR-264	NM_076793.1
cel-miR-36-3p	NM_001306239.1
cel-miR-36-3p	NM_058732.3
cel-miR-36-3p	NM_001026341.2
cel-miR-36-3p	NM_061525.3
cel-miR-36-3p	NM_062304.4
cel-miR-36-3p	NM_001312960.1
cel-miR-36-3p	NM_171367.5
cel-miR-36-3p	NM_001307023.1
cel-miR-36-3p	NM_073858.4
cel-miR-36-3p	NM_076793.1
cel-miR-36-3p	MTCONS_00013296
cel-miR-37-3p	NM_001306239.1
cel-miR-37-3p	NM_058732.3
cel-miR-37-3p	NM_001026341.2
cel-miR-37-3p	NM_061525.3
cel-miR-37-3p	NM_062304.4
cel-miR-37-3p	NM_001312960.1
cel-miR-37-3p	NM_171367.5
cel-miR-37-3p	NM_001307023.1
cel-miR-37-3p	NM_073858.4
cel-miR-37-3p	NM_076793.1
cel-miR-37-3p	MTCONS_00013296
cel-miR-1832a-3p	NM_001312960.1
cel-miR-35-3p	NM_058732.3
cel-miR-35-3p	NM_061525.3
cel-miR-35-3p	NM_062304.4
cel-miR-35-3p	NM_001312960.1
cel-miR-35-3p	NM_171367.5
cel-miR-35-3p	NM_001307023.1
cel-miR-35-3p	NM_073858.4
cel-miR-35-3p	NM_076793.1
cel-miR-35-3p	MTCONS_00013296
cel-miR-42-5p	NM_001306239.1
cel-miR-38-3p	NM_001306239.1
cel-miR-38-3p	NM_058732.3
cel-miR-38-3p	NM_001026341.2
cel-miR-38-3p	NM_061525.3
cel-miR-38-3p	NM_062304.4
cel-miR-38-3p	NM_001312960.1
cel-miR-38-3p	NM_171367.5
cel-miR-38-3p	NM_001307023.1
cel-miR-38-3p	NM_076793.1
cel-miR-38-3p	MTCONS_00013296
cel-miR-2-5p	NM_001026341.2
cel-miR-41-3p	NM_058732.3
cel-miR-41-3p	NM_061525.3
cel-miR-41-3p	NM_062304.4
cel-miR-41-3p	NM_171367.5
cel-miR-41-3p	NM_073858.4
cel-miR-41-3p	MTCONS_00013296
novel_mir73	NM_001306239.1
novel_mir73	NM_073858.4

## Sheet: Top 4 ceRNA-miRNA-RNA-network
from	to
NM_001026691.3	cel-miR-39-3p
NM_001026691.3	cel-miR-45-5p
NM_001026691.3	cel-miR-1822-5p
NM_001026691.3	cel-miR-232-5p
NM_001026691.3	cel-miR-233-3p
NM_001026691.3	cel-miR-40-3p
NM_001026691.3	cel-miR-44-5p
NM_001026691.3	cel-miR-36-3p
NM_001026691.3	cel-miR-37-3p
NM_001026691.3	cel-miR-42-3p
NM_001026691.3	cel-miR-35-3p
NM_001026691.3	cel-miR-38-3p
NM_001026691.3	cel-miR-41-3p
NM_001026691.3	cel-miR-1824-3p
NM_001026691.3	novel_mir51
NM_001026691.3	novel_mir84
NM_001026691.3	novel_mir4
NM_001026691.3	novel_mir10
cel-miR-39-3p	NM_058588.4
cel-miR-39-3p	NM_001322514.1
cel-miR-39-3p	NM_171134.6
cel-miR-39-3p	NM_001129324.2
cel-miR-39-3p	NM_001313087.1
cel-miR-39-3p	NM_001313063.1
cel-miR-39-3p	NM_001029708.2
cel-miR-39-3p	MTCONS_00006373
cel-miR-39-3p	MTCONS_00010922
cel-miR-39-3p	MTCONS_00036514
cel-miR-45-5p	NM_171134.6
cel-miR-1822-5p	NM_059978.1
cel-miR-1822-5p	NM_001322514.1
cel-miR-232-5p	NM_001129324.2
cel-miR-233-3p	NM_001129324.2
cel-miR-233-3p	NM_001313087.1
cel-miR-233-3p	NM_001029708.2
cel-miR-233-3p	MTCONS_00010922
cel-miR-40-3p	NM_058588.4
cel-miR-40-3p	NM_001322514.1
cel-miR-40-3p	NM_171134.6
cel-miR-40-3p	NM_001129324.2
cel-miR-40-3p	NM_001313063.1
cel-miR-40-3p	MTCONS_00006373
cel-miR-40-3p	MTCONS_00010922
cel-miR-40-3p	MTCONS_00036514
cel-miR-44-5p	NM_171134.6
cel-miR-36-3p	NM_058588.4
cel-miR-36-3p	NM_059978.1
cel-miR-36-3p	NM_001322514.1
cel-miR-36-3p	NM_171134.6
cel-miR-36-3p	NM_001129324.2
cel-miR-36-3p	NM_001313087.1
cel-miR-36-3p	NM_001313063.1
cel-miR-36-3p	MTCONS_00006373
cel-miR-36-3p	MTCONS_00010922
cel-miR-36-3p	MTCONS_00036514
cel-miR-37-3p	NM_058588.4
cel-miR-37-3p	NM_059978.1
cel-miR-37-3p	NM_001322514.1
cel-miR-37-3p	NM_171134.6
cel-miR-37-3p	NM_001129324.2
cel-miR-37-3p	NM_001313087.1
cel-miR-37-3p	NM_001313063.1
cel-miR-37-3p	NM_001029708.2
cel-miR-37-3p	MTCONS_00006373
cel-miR-37-3p	MTCONS_00010922
cel-miR-37-3p	MTCONS_00036514
cel-miR-42-3p	NM_058588.4
cel-miR-42-3p	NM_001322514.1
cel-miR-42-3p	NM_001129324.2
cel-miR-42-3p	NM_001313063.1
cel-miR-42-3p	NM_001029708.2
cel-miR-42-3p	MTCONS_00010922
cel-miR-42-3p	MTCONS_00036514
cel-miR-35-3p	NM_058588.4
cel-miR-35-3p	NM_059978.1
cel-miR-35-3p	NM_001322514.1
cel-miR-35-3p	NM_171134.6
cel-miR-35-3p	NM_001129324.2
cel-miR-35-3p	NM_001313087.1
cel-miR-35-3p	NM_001313063.1
cel-miR-35-3p	NM_001029708.2
cel-miR-35-3p	MTCONS_00006373
cel-miR-35-3p	MTCONS_00036514
cel-miR-38-3p	NM_058588.4
cel-miR-38-3p	NM_059978.1
cel-miR-38-3p	NM_001322514.1
cel-miR-38-3p	NM_171134.6
cel-miR-38-3p	NM_001129324.2
cel-miR-38-3p	NM_001313087.1
cel-miR-38-3p	NM_001313063.1
cel-miR-38-3p	NM_001029708.2
cel-miR-38-3p	MTCONS_00006373
cel-miR-38-3p	MTCONS_00010922
cel-miR-41-3p	NM_058588.4
cel-miR-41-3p	NM_059978.1
cel-miR-41-3p	NM_171134.6
cel-miR-41-3p	NM_001313063.1
cel-miR-41-3p	NM_001029708.2
cel-miR-41-3p	MTCONS_00006373
cel-miR-41-3p	MTCONS_00010922
cel-miR-41-3p	MTCONS_00036514
cel-miR-1824-3p	NM_001029708.2
novel_mir51	NM_001313087.1
novel_mir84	MTCONS_00006373
novel_mir84	MTCONS_00036514
novel_mir4	NM_001129324.2
novel_mir4	NM_001313087.1
novel_mir10	NM_058588.4

## Sheet: Top 5 ceRNA-miRNA-RNA-network
from	to
NM_001027425.3	cel-miR-39-3p
NM_001027425.3	cel-miR-40-3p
NM_001027425.3	cel-miR-38-5p
NM_001027425.3	cel-miR-37-3p
NM_001027425.3	cel-miR-42-3p
NM_001027425.3	cel-miR-356b-5p
NM_001027425.3	cel-miR-35-3p
NM_001027425.3	cel-miR-38-3p
cel-miR-39-3p	NM_065296.3
cel-miR-39-3p	NM_067266.3
cel-miR-39-3p	NM_001129324.2
cel-miR-39-3p	NM_071374.3
cel-miR-39-3p	NM_075738.2
cel-miR-39-3p	NM_001307864.1
cel-miR-39-3p	NM_077083.3
cel-miR-39-3p	MTCONS_00016128
cel-miR-39-3p	MTCONS_00034888
cel-miR-40-3p	NM_065296.3
cel-miR-40-3p	NM_001312960.1
cel-miR-40-3p	NM_001129324.2
cel-miR-40-3p	NM_075738.2
cel-miR-40-3p	NM_001307864.1
cel-miR-40-3p	NM_077083.3
cel-miR-40-3p	MTCONS_00016128
cel-miR-40-3p	MTCONS_00034888
cel-miR-38-5p	NM_065296.3
cel-miR-37-3p	NM_065296.3
cel-miR-37-3p	NM_001312960.1
cel-miR-37-3p	NM_067266.3
cel-miR-37-3p	NM_001129324.2
cel-miR-37-3p	NM_071374.3
cel-miR-37-3p	NM_075738.2
cel-miR-37-3p	NM_001307864.1
cel-miR-37-3p	NM_077083.3
cel-miR-37-3p	MTCONS_00016128
cel-miR-42-3p	NM_065296.3
cel-miR-42-3p	NM_001312960.1
cel-miR-42-3p	NM_001129324.2
cel-miR-42-3p	NM_001307864.1
cel-miR-42-3p	NM_077083.3
cel-miR-42-3p	MTCONS_00016128
cel-miR-356b-5p	NM_077083.3
cel-miR-35-3p	NM_065296.3
cel-miR-35-3p	NM_001312960.1
cel-miR-35-3p	NM_067266.3
cel-miR-35-3p	NM_001129324.2
cel-miR-35-3p	NM_071374.3
cel-miR-35-3p	NM_075738.2
cel-miR-35-3p	NM_001307864.1
cel-miR-35-3p	NM_077083.3
cel-miR-35-3p	MTCONS_00016128
cel-miR-35-3p	MTCONS_00034888
cel-miR-38-3p	NM_001312960.1
cel-miR-38-3p	NM_067266.3
cel-miR-38-3p	NM_001129324.2
cel-miR-38-3p	NM_071374.3
cel-miR-38-3p	NM_001307864.1
cel-miR-38-3p	MTCONS_00034888

## Sheet: Top 6 ceRNA-miRNA-RNA-network
from	to
NM_001129188.1	cel-miR-39-3p
NM_001129188.1	cel-miR-40-3p
NM_001129188.1	cel-miR-36-3p
NM_001129188.1	cel-miR-37-3p
NM_001129188.1	cel-miR-42-3p
NM_001129188.1	cel-miR-76-3p
NM_001129188.1	cel-miR-35-3p
NM_001129188.1	cel-miR-55-5p
NM_001129188.1	cel-miR-38-3p
NM_001129188.1	cel-miR-8211-3p
NM_001129188.1	cel-miR-41-3p
NM_001129188.1	novel_mir73
cel-miR-39-3p	NM_001306238.1
cel-miR-39-3p	NM_001306482.1
cel-miR-39-3p	NM_001136305.2
cel-miR-39-3p	NM_001047362.2
cel-miR-39-3p	NM_001307531.1
cel-miR-39-3p	NM_001268849.1
cel-miR-39-3p	NM_075474.4
cel-miR-39-3p	MTCONS_00015713
cel-miR-39-3p	MTCONS_00035045
cel-miR-40-3p	NM_001306238.1
cel-miR-40-3p	NM_001306482.1
cel-miR-40-3p	NM_001136305.2
cel-miR-40-3p	NM_001047362.2
cel-miR-40-3p	NM_001268849.1
cel-miR-40-3p	NM_001322542.1
cel-miR-40-3p	NM_075474.4
cel-miR-40-3p	MTCONS_00015713
cel-miR-40-3p	MTCONS_00035045
cel-miR-36-3p	NM_001306238.1
cel-miR-36-3p	NM_001306482.1
cel-miR-36-3p	NM_001136305.2
cel-miR-36-3p	NM_001047362.2
cel-miR-36-3p	NM_001307531.1
cel-miR-36-3p	NM_001268849.1
cel-miR-36-3p	NM_001322542.1
cel-miR-36-3p	NM_075474.4
cel-miR-36-3p	MTCONS_00035045
cel-miR-37-3p	NM_001306238.1
cel-miR-37-3p	NM_001306482.1
cel-miR-37-3p	NM_001136305.2
cel-miR-37-3p	NM_001047362.2
cel-miR-37-3p	NM_001307531.1
cel-miR-37-3p	NM_001268849.1
cel-miR-37-3p	NM_001322542.1
cel-miR-37-3p	NM_075474.4
cel-miR-37-3p	MTCONS_00015713
cel-miR-37-3p	MTCONS_00035045
cel-miR-42-3p	NM_001306482.1
cel-miR-42-3p	NM_001047362.2
cel-miR-42-3p	NM_001268849.1
cel-miR-42-3p	NM_001322542.1
cel-miR-42-3p	NM_075474.4
cel-miR-42-3p	MTCONS_00035045
cel-miR-76-3p	NM_001306238.1
cel-miR-35-3p	NM_001306482.1
cel-miR-35-3p	NM_001136305.2
cel-miR-35-3p	NM_001047362.2
cel-miR-35-3p	NM_001307531.1
cel-miR-35-3p	NM_001268849.1
cel-miR-35-3p	NM_001322542.1
cel-miR-35-3p	NM_075474.4
cel-miR-35-3p	MTCONS_00015713
cel-miR-35-3p	MTCONS_00035045
cel-miR-55-5p	NM_001307531.1
cel-miR-38-3p	NM_001306238.1
cel-miR-38-3p	NM_001306482.1
cel-miR-38-3p	NM_001136305.2
cel-miR-38-3p	NM_001047362.2
cel-miR-38-3p	NM_001307531.1
cel-miR-38-3p	NM_001268849.1
cel-miR-38-3p	NM_001322542.1
cel-miR-38-3p	NM_075474.4
cel-miR-38-3p	MTCONS_00015713
cel-miR-8211-3p	NM_001307531.1
cel-miR-8211-3p	NM_075474.4
cel-miR-41-3p	NM_001306482.1
cel-miR-41-3p	NM_001136305.2
cel-miR-41-3p	NM_001047362.2
cel-miR-41-3p	NM_001268849.1
cel-miR-41-3p	NM_075474.4
cel-miR-41-3p	MTCONS_00015713
cel-miR-41-3p	MTCONS_00035045
novel_mir73	NM_001306238.1
novel_mir73	MTCONS_00035045

## Sheet: Top 7 ceRNA-miRNA-RNA-network
from	to
NM_001129530.3	cel-miR-39-3p
NM_001129530.3	cel-miR-40-3p
NM_001129530.3	cel-miR-36-3p
NM_001129530.3	cel-miR-37-3p
NM_001129530.3	cel-miR-35-3p
NM_001129530.3	cel-miR-38-3p
NM_001129530.3	cel-miR-41-3p
cel-miR-39-3p	NM_001306365.1
cel-miR-39-3p	NM_001267997.1
cel-miR-39-3p	NM_001268182.1
cel-miR-39-3p	NM_074803.3
cel-miR-39-3p	MTCONS_00003975
cel-miR-39-3p	MTCONS_00010922
cel-miR-39-3p	MTCONS_00017605
cel-miR-39-3p	MTCONS_00036514
cel-miR-40-3p	NM_001306365.1
cel-miR-40-3p	NM_001267997.1
cel-miR-40-3p	NM_001268182.1
cel-miR-40-3p	NM_074803.3
cel-miR-40-3p	NM_077479.2
cel-miR-40-3p	MTCONS_00003975
cel-miR-40-3p	MTCONS_00010922
cel-miR-40-3p	MTCONS_00017605
cel-miR-40-3p	MTCONS_00036514
cel-miR-36-3p	NM_001267997.1
cel-miR-36-3p	NM_001268182.1
cel-miR-36-3p	NM_075832.3
cel-miR-36-3p	NM_077479.2
cel-miR-36-3p	MTCONS_00010922
cel-miR-36-3p	MTCONS_00017605
cel-miR-36-3p	MTCONS_00036514
cel-miR-37-3p	NM_001306365.1
cel-miR-37-3p	NM_001267997.1
cel-miR-37-3p	NM_001268182.1
cel-miR-37-3p	NM_074803.3
cel-miR-37-3p	NM_075832.3
cel-miR-37-3p	NM_077479.2
cel-miR-37-3p	MTCONS_00003975
cel-miR-37-3p	MTCONS_00010922
cel-miR-37-3p	MTCONS_00017605
cel-miR-37-3p	MTCONS_00036514
cel-miR-35-3p	NM_001306365.1
cel-miR-35-3p	NM_001267997.1
cel-miR-35-3p	NM_001268182.1
cel-miR-35-3p	NM_074803.3
cel-miR-35-3p	NM_075832.3
cel-miR-35-3p	NM_077479.2
cel-miR-35-3p	MTCONS_00003975
cel-miR-35-3p	MTCONS_00017605
cel-miR-35-3p	MTCONS_00036514
cel-miR-38-3p	NM_001306365.1
cel-miR-38-3p	NM_001267997.1
cel-miR-38-3p	NM_075832.3
cel-miR-38-3p	MTCONS_00003975
cel-miR-38-3p	MTCONS_00010922
cel-miR-38-3p	MTCONS_00017605
cel-miR-41-3p	NM_001267997.1
cel-miR-41-3p	NM_001268182.1
cel-miR-41-3p	MTCONS_00010922
cel-miR-41-3p	MTCONS_00017605
cel-miR-41-3p	MTCONS_00036514

## Sheet: Top 8 ceRNA-miRNA-RNA-network
from	to
NM_001307864.1	cel-miR-39-3p
NM_001307864.1	cel-miR-40-3p
NM_001307864.1	cel-miR-8195-5p
NM_001307864.1	cel-miR-36-3p
NM_001307864.1	cel-miR-37-3p
NM_001307864.1	cel-miR-42-3p
NM_001307864.1	cel-miR-35-3p
NM_001307864.1	cel-miR-38-3p
NM_001307864.1	cel-miR-41-3p
NM_001307864.1	novel_mir4
NM_001307864.1	novel_mir7
NM_001307864.1	novel_mir17
cel-miR-39-3p	NM_058796.4
cel-miR-39-3p	NM_063216.5
cel-miR-39-3p	NM_001129188.1
cel-miR-39-3p	NM_171134.6
cel-miR-39-3p	NM_001027396.3
cel-miR-39-3p	NM_001312967.1
cel-miR-39-3p	NM_073402.4
cel-miR-39-3p	MTCONS_00013961
cel-miR-39-3p	MTCONS_00023896
cel-miR-40-3p	NM_058796.4
cel-miR-40-3p	NM_063216.5
cel-miR-40-3p	NM_001129188.1
cel-miR-40-3p	NM_171134.6
cel-miR-40-3p	NM_001027396.3
cel-miR-40-3p	NM_001312967.1
cel-miR-40-3p	NM_073402.4
cel-miR-40-3p	MTCONS_00013961
cel-miR-8195-5p	NM_001312967.1
cel-miR-8195-5p	MTCONS_00023896
cel-miR-36-3p	NM_058796.4
cel-miR-36-3p	NM_063216.5
cel-miR-36-3p	NM_001129188.1
cel-miR-36-3p	NM_171134.6
cel-miR-36-3p	NM_001027396.3
cel-miR-36-3p	NM_001312967.1
cel-miR-36-3p	NM_171263.6
cel-miR-36-3p	MTCONS_00013961
cel-miR-36-3p	MTCONS_00023896
cel-miR-37-3p	NM_058796.4
cel-miR-37-3p	NM_063216.5
cel-miR-37-3p	NM_001129188.1
cel-miR-37-3p	NM_171134.6
cel-miR-37-3p	NM_001027396.3
cel-miR-37-3p	NM_001312967.1
cel-miR-37-3p	NM_073402.4
cel-miR-37-3p	MTCONS_00013961
cel-miR-37-3p	MTCONS_00023896
cel-miR-42-3p	NM_058796.4
cel-miR-42-3p	NM_063216.5
cel-miR-42-3p	NM_001129188.1
cel-miR-42-3p	NM_001027396.3
cel-miR-42-3p	NM_001312967.1
cel-miR-42-3p	NM_171263.6
cel-miR-35-3p	NM_063216.5
cel-miR-35-3p	NM_001129188.1
cel-miR-35-3p	NM_171134.6
cel-miR-35-3p	NM_001027396.3
cel-miR-35-3p	NM_001312967.1
cel-miR-35-3p	NM_171263.6
cel-miR-35-3p	NM_073402.4
cel-miR-35-3p	MTCONS_00013961
cel-miR-35-3p	MTCONS_00023896
cel-miR-38-3p	NM_001129188.1
cel-miR-38-3p	NM_171134.6
cel-miR-38-3p	NM_001027396.3
cel-miR-38-3p	NM_001312967.1
cel-miR-38-3p	NM_171263.6
cel-miR-38-3p	NM_073402.4
cel-miR-38-3p	MTCONS_00013961
cel-miR-38-3p	MTCONS_00023896
cel-miR-41-3p	NM_058796.4
cel-miR-41-3p	NM_063216.5
cel-miR-41-3p	NM_001129188.1
cel-miR-41-3p	NM_171134.6
cel-miR-41-3p	NM_001027396.3
cel-miR-41-3p	NM_001312967.1
cel-miR-41-3p	MTCONS_00013961
novel_mir4	NM_001027396.3
novel_mir4	MTCONS_00023896
novel_mir7	MTCONS_00023896
novel_mir17	NM_171263.6

## Sheet: Top 9 ceRNA-miRNA-RNA-network
from	to
NM_001330808.1	cel-miR-39-3p
NM_001330808.1	cel-miR-40-3p
NM_001330808.1	cel-miR-36-3p
NM_001330808.1	cel-miR-37-3p
NM_001330808.1	cel-miR-42-3p
NM_001330808.1	cel-miR-35-3p
NM_001330808.1	cel-miR-38-3p
NM_001330808.1	cel-miR-8190-5p
NM_001330808.1	novel_mir82
cel-miR-39-3p	LTCONS_00023805
cel-miR-40-3p	LTCONS_00023805
cel-miR-35-3p	LTCONS_00023805
cel-miR-38-3p	LTCONS_00023805
cel-miR-39-3p	NM_058588.4
cel-miR-39-3p	NM_182053.5
cel-miR-39-3p	NM_063557.4
cel-miR-39-3p	NM_001267480.1
cel-miR-39-3p	NM_066899.7
cel-miR-39-3p	NM_001313105.1
cel-miR-39-3p	NM_071516.3
cel-miR-39-3p	MTCONS_00001451
cel-miR-39-3p	MTCONS_00030687
cel-miR-40-3p	NM_058588.4
cel-miR-40-3p	NM_182053.5
cel-miR-40-3p	NM_063557.4
cel-miR-40-3p	NM_001267480.1
cel-miR-40-3p	NM_066899.7
cel-miR-40-3p	NM_071516.3
cel-miR-40-3p	MTCONS_00001451
cel-miR-40-3p	MTCONS_00030687
cel-miR-36-3p	NM_058588.4
cel-miR-36-3p	NM_063557.4
cel-miR-36-3p	NM_001267480.1
cel-miR-36-3p	NM_066899.7
cel-miR-36-3p	NM_001313105.1
cel-miR-36-3p	NM_071516.3
cel-miR-36-3p	MTCONS_00001451
cel-miR-36-3p	MTCONS_00030687
cel-miR-37-3p	NM_058588.4
cel-miR-37-3p	NM_182053.5
cel-miR-37-3p	NM_063557.4
cel-miR-37-3p	NM_001267480.1
cel-miR-37-3p	NM_066899.7
cel-miR-37-3p	NM_001313105.1
cel-miR-37-3p	NM_071516.3
cel-miR-37-3p	MTCONS_00001451
cel-miR-37-3p	MTCONS_00030687
cel-miR-42-3p	NM_058588.4
cel-miR-42-3p	NM_182053.5
cel-miR-42-3p	NM_063557.4
cel-miR-42-3p	NM_066899.7
cel-miR-42-3p	NM_071516.3
cel-miR-42-3p	MTCONS_00001451
cel-miR-42-3p	MTCONS_00030687
cel-miR-35-3p	NM_058588.4
cel-miR-35-3p	NM_182053.5
cel-miR-35-3p	NM_001267480.1
cel-miR-35-3p	NM_066899.7
cel-miR-35-3p	NM_001313105.1
cel-miR-35-3p	NM_071516.3
cel-miR-35-3p	MTCONS_00001451
cel-miR-35-3p	MTCONS_00030687
cel-miR-38-3p	NM_058588.4
cel-miR-38-3p	NM_182053.5
cel-miR-38-3p	NM_063557.4
cel-miR-38-3p	NM_001267480.1
cel-miR-38-3p	NM_066899.7
cel-miR-38-3p	NM_001313105.1
cel-miR-38-3p	NM_071516.3
cel-miR-38-3p	MTCONS_00001451
cel-miR-8190-5p	NM_058588.4
novel_mir82	MTCONS_00001451

## Sheet: Top 10 ceRNA-miRNA-RNA-network
from	to
NM_058557.3	cel-miR-39-3p
NM_058557.3	cel-miR-40-3p
NM_058557.3	cel-miR-8210-5p
NM_058557.3	cel-miR-36-3p
NM_058557.3	cel-miR-5548-5p
NM_058557.3	cel-miR-37-3p
NM_058557.3	cel-miR-42-3p
NM_058557.3	cel-miR-4934
NM_058557.3	cel-miR-5595-5p
NM_058557.3	cel-miR-35-3p
NM_058557.3	cel-miR-38-3p
NM_058557.3	cel-miR-41-3p
NM_058557.3	novel_mir51
cel-miR-39-3p	LTCONS_00011150
cel-miR-39-3p	LTCONS_00020605
cel-miR-40-3p	LTCONS_00011150
cel-miR-40-3p	LTCONS_00020605
cel-miR-36-3p	LTCONS_00011150
cel-miR-36-3p	LTCONS_00020605
cel-miR-37-3p	LTCONS_00011150
cel-miR-37-3p	LTCONS_00020605
cel-miR-42-3p	LTCONS_00011150
cel-miR-42-3p	LTCONS_00020605
cel-miR-35-3p	LTCONS_00011150
cel-miR-35-3p	LTCONS_00020605
cel-miR-38-3p	LTCONS_00011150
cel-miR-38-3p	LTCONS_00020605
cel-miR-41-3p	LTCONS_00020605
cel-miR-39-3p	NM_001267481.1
cel-miR-39-3p	NM_001322514.1
cel-miR-39-3p	NM_001312963.1
cel-miR-39-3p	NM_001307629.1
cel-miR-39-3p	NM_074781.6
cel-miR-39-3p	MTCONS_00017036
cel-miR-39-3p	MTCONS_00035508
cel-miR-40-3p	NM_001267481.1
cel-miR-40-3p	NM_001322514.1
cel-miR-40-3p	NM_001312963.1
cel-miR-40-3p	NM_001307629.1
cel-miR-40-3p	NM_074781.6
cel-miR-40-3p	MTCONS_00017036
cel-miR-40-3p	MTCONS_00035508
cel-miR-8210-5p	NM_001267481.1
cel-miR-36-3p	NM_001267481.1
cel-miR-36-3p	NM_001322514.1
cel-miR-36-3p	NM_001312963.1
cel-miR-36-3p	NM_001307629.1
cel-miR-36-3p	NM_073654.4
cel-miR-36-3p	NM_074781.6
cel-miR-36-3p	MTCONS_00017036
cel-miR-36-3p	MTCONS_00035508
cel-miR-5548-5p	NM_001267481.1
cel-miR-5548-5p	NM_001307629.1
cel-miR-37-3p	NM_001267481.1
cel-miR-37-3p	NM_001322514.1
cel-miR-37-3p	NM_001312963.1
cel-miR-37-3p	NM_001307629.1
cel-miR-37-3p	NM_074781.6
cel-miR-37-3p	MTCONS_00017036
cel-miR-37-3p	MTCONS_00035508
cel-miR-42-3p	NM_001322514.1
cel-miR-42-3p	NM_001312963.1
cel-miR-42-3p	NM_001307629.1
cel-miR-42-3p	NM_073654.4
cel-miR-42-3p	NM_074781.6
cel-miR-42-3p	MTCONS_00035508
cel-miR-4934	NM_001312963.1
cel-miR-5595-5p	NM_001312963.1
cel-miR-35-3p	NM_001267481.1
cel-miR-35-3p	NM_001322514.1
cel-miR-35-3p	NM_001312963.1
cel-miR-35-3p	NM_001307629.1
cel-miR-35-3p	NM_074781.6
cel-miR-35-3p	MTCONS_00017036
cel-miR-35-3p	MTCONS_00035508
cel-miR-38-3p	NM_001267481.1
cel-miR-38-3p	NM_001322514.1
cel-miR-38-3p	NM_001312963.1
cel-miR-38-3p	NM_001307629.1
cel-miR-38-3p	NM_073654.4
cel-miR-38-3p	NM_074781.6
cel-miR-38-3p	MTCONS_00017036
cel-miR-38-3p	MTCONS_00035508
cel-miR-41-3p	NM_001312963.1
cel-miR-41-3p	NM_001307629.1
cel-miR-41-3p	NM_073654.4
cel-miR-41-3p	NM_074781.6
cel-miR-41-3p	MTCONS_00017036
cel-miR-41-3p	MTCONS_00035508
novel_mir51	MTCONS_00035508
