# Supplementary material for: The whole transcriptome regulation as a function of mitochondrial polymorphisms and aging in Caenorhabditis elegans
Source: Aging (Albany NY). 2020 Feb 4;12(3):2453–70. doi: 10.18632/aging.102754 (PMC7041728; doi:10.18632/aging.102754)
Supplement: Supplementary Table 6 [file aging-12-102754-s005..xlsx]

## Sheet: Sheet1
Compound ID	Compound.ID	ratio	t.test_p.value_BHcorrect	VIP	sample	ID.1	KEGG.ID	Formula	Adducts	Score	Fragmentation.Score	Mass.Error..ppm.	Isotope.Similarity	Description	Super.class	Class	Sub.class	m.z	Neutral.mass..Da.	Retention.time..min.	Charge	Pathway
0.34_227.9206m/z	0.42_211.9555n	0.691612	0.0168968	1.05471	NC30-D9:N2-D9	C00324	C00324	C6FeN6-3	M+H-H2O, M+H	18.5	0	9.86926	3.10412	Ferricyanide; Hexacyanoferrate(III);	null	null	null	194.952	211.955	0.419033	1	NULL
0.36_89.5069m/z	0.42_211.9555n	0.691612	0.0168968	1.05471	NC30-D9:N2-D9	C01913	C01913	C6FeN6-4	M+H-H2O, M+H	18.5	0	9.86926	3.10412	Ferrocyanide; Hexacyanoferrate(II);	Organic salts	Cyanide salts	null	194.952	211.955	0.419033	1	NULL
0.42_211.9555n	0.50_166.0169m/z	0.572646	0.0168968	1.33649	NC30-D9:N2-D9	C16511	C16511	C4H9NO5S	M+H-H2O	37.8	0	0.450847	89.4782	L-Homocysteic acid; (2S)-2-Amino-4-sulfobutanoic acid;	Organic acids and derivatives	Carboxylic acids and derivatives	Amino acids, peptides, and analogues	166.017	NA	0.50475	1	map04080 Neuroactive ligand-receptor interaction
0.43_211.9263m/z	0.50_185.0217m/z	0.626093	0.017949	1.255	NC30-D9:N2-D9	C14437	C14437	C7H5NS2	M+NH4	35.4	0	9.35644	87.4964	2-Mercaptobenzothiazole; Captax;	Organoheterocyclic compounds	Benzothiazoles	null	185.022	NA	0.50475	1	NULL
0.45_183.9315m/z	0.50_288.9160m/z	0.61049	0.0168968	1.14605	NC30-D9:N2-D9	C11536	C11536	C3H7O9PS	M+K	31.3	0	-7.8296	65.4024	(2R)-O-Phospho-3-sulfolactate; (2R)-Phosphosulfolactate;	null	null	null	288.916	NA	0.50475	1	map00680 Methane metabolism; map01120 Microbial metabolism in diverse environments
0.45_199.9263m/z	0.53_263.0800m/z	0.608253	0.0197345	1.64794	NC30-D9:N2-D9	C16996	C16996	C16H12N2O3	M+H-H2O	35.7	1.51	-5.28849	82.864	Methyl nigakinone;	null	null	null	263.08	NA	0.533317	1	NULL
0.49_112.5337m/z	0.55_260.0437n	0.744061	0.0179167	1.06581	NC30-D9:N2-D9	C13112	C13112	C9H11ClN3O4	M+H, M+NH4	34.3	0	-0.591556	72.4206	Ancitabin hydrochloride; Cyclocytidine;	null	null	null	261.051	260.044	0.547617	1	NULL
0.50_101.9633n	0.56_226.0378m/z	0.735091	0.0285922	1.1301	NC30-D9:N2-D9	C19844	C19844	C8H10Cl2O2	M+NH4	26	0.631	-8.84026	39.314	(1S,3R)-3-(2,2-Dichloroethenyl)-2,2-dimethylcyclopropanecarboxylate;	null	null	null	226.038	NA	0.5619	1	NULL
0.50_102.0337m/z	0.59_106.0863m/z	0.364137	0.0299563	2.00349	NC30-D9:N2-D9	C06772	C06772	C4H11NO2	M+H	38.8	0	0.815824	94.8758	Diethanolamine;	Organic nitrogen compounds	Organonitrogen compounds	Amines	106.086	NA	0.590467	1	map00564 Glycerophospholipid metabolism
0.50_133.9754m/z	0.59_106.0863m/z	0.364137	0.0299563	2.00349	NC30-D9:N2-D9	C11260	C11260	C4H11NO2	M+H	38.8	0	0.815824	94.8758	2-Amino-2-methyl-1,3-propandiol; Aminomethyl propanediol;	null	null	null	106.086	NA	0.590467	1	NULL
0.50_166.0169m/z	0.59_170.1039n	1.97602	0.0375381	1.85597	NC30-D9:N2-D9	C07841	C07841	C8H14N2O2	M+NH4, M+K	36.7	0	-9.35203	93.637	Levetiracetam;	null	null	null	209.058	170.104	0.590467	1	NULL
0.50_185.0217m/z	0.59_280.0947m/z	0.769437	0.0203351	1.00889	NC30-D9:N2-D9	C07149	C07149	C15H15NO3	M+Na	43.4	22.4	1.26915	96.2353	Tolmetin;	Organic oxygen compounds	Organooxygen compounds	Carbonyl compounds	280.095	NA	0.590467	1	NULL
0.50_188.9942n	0.60_142.0265m/z	2.22065	0.0168968	1.72021	NC30-D9:N2-D9	C00346	C00346	C2H8NO4P	M+H	49	49.4	0.782159	96.5056	Ethanolamine phosphate; O-Phosphorylethanolamine; Phosphoethanolamine; O-Phosphoethanolamine;	Organic acids and derivatives	Organic phosphoric acids and derivatives	Phosphate esters	142.026	NA	0.60475	1	map00564 Glycerophospholipid metabolism; map00600 Sphingolipid metabolism; map01100 Metabolic pathways; map01503 Cationic antimicrobial peptide (CAMP) resistance; map04071 Sphingolipid signaling pathway
0.50_200.0835m/z	0.62_184.0726m/z	2.84918	0.0168968	2.41309	NC30-D9:N2-D9	C20345	C20345	C5H11O4P	M+NH4	46.3	38.3	-4.59642	98.6417	Isopentenyl phosphate;	null	null	null	184.073	NA	0.619033	1	map00900 Terpenoid backbone biosynthesis; map01110 Biosynthesis of secondary metabolites; map01130 Biosynthesis of antibiotics
0.50_247.8907m/z	0.63_124.9996m/z	1.92048	0.0168968	1.94704	NC30-D9:N2-D9	C03167	C03167	C2H5O4P	M+H	42.3	17.7	-2.04152	96.0673	Phosphonoacetaldehyde; 2-Phosphonoacetaldehyde; 2-Oxoethylphosphonate;	null	null	null	125	NA	0.633333	1	map00440 Phosphonate and phosphinate metabolism; map01100 Metabolic pathways; map01120 Microbial metabolism in diverse environments; map01130 Biosynthesis of antibiotics
0.50_271.9145m/z	0.65_378.1128m/z	2.27328	0.045038	2.57055	NC30-D9:N2-D9	C17303	C17303	C20H21NO3S	M+Na	35.4	0.111	-1.66169	78.764	AL-321; 5-(4-(2-Methyl-2-phenylpropoxy)benzyl)thiazolidine-2,4-dione;	null	null	null	378.113	NA	0.647617	1	map07222 Peroxisome proliferator-activated receptor (PPAR) agonists
0.50_288.9160m/z	0.66_118.0865m/z	2.30263	0.0174005	2.56057	NC30-D9:N2-D9	C15987	C15987	C5H11NO2	M+H	44.8	26.4	1.78022	99.802	4-Methylaminobutyrate; gamma-N-Methylaminobutyrate;	null	null	null	118.086	NA	0.6619	1	map00760 Nicotinate and nicotinamide metabolism; map01120 Microbial metabolism in diverse environments
0.50_61.0130m/z	0.68_391.1886m/z	2.74943	0.0368727	1.91286	NC30-D9:N2-D9	C11997	C11997	C20H32O5	M+K	39.6	13.5	1.46545	86.2533	Narbonolide;	null	null	null	391.189	NA	0.676183	1	map00522 Biosynthesis of 12-, 14- and 16-membered macrolides; map01130 Biosynthesis of antibiotics
0.50_81.5207m/z	0.68_391.1886m/z	2.74943	0.0368727	1.91286	NC30-D9:N2-D9	C01312	C01312	C20H32O5	M+K	39.6	13.5	1.46545	86.2533	Prostaglandin I2; (5Z,13E)-(15S)-6,9alpha-Epoxy-11alpha,15-dihydroxyprosta-5,13-dienoate; Prostacyclin; PGI2; Epoprostenol;	Lipids and lipid-like molecules	Fatty Acyls	Eicosanoids	391.189	NA	0.676183	1	map00590 Arachidonic acid metabolism; map01100 Metabolic pathways; map04024 cAMP signaling pathway; map04080 Neuroactive ligand-receptor interaction; map04270 Vascular smooth muscle contraction; map04370 VEGF signaling pathway; map04611 Platelet activation
0.50_83.5169m/z	0.69_199.9861m/z	0.571923	0.0175824	1.03018	NC30-D9:N2-D9	C11582	C11582	C6H7Cl2N2	M+Na	28.2	0	-9.76487	51.4788	2-Chlorophenylhydrazine hydrochloride; o-Chlorophenylhydrazine hydrochloride;	null	null	null	199.986	NA	0.690467	1	NULL
0.50_88.9521m/z	0.69_228.0485m/z	0.70471	0.0168968	1.17261	NC30-D9:N2-D9	C06048	C06048	C9H9NO6	M+H	33.3	9.08	-7.76915	65.9356	Stizolobinate; Stizolobinic acid;	null	null	null	228.048	NA	0.690467	1	map00350 Tyrosine metabolism
0.50_90.5255m/z	0.71_416.0794m/z	2.46077	0.0351476	2.60516	NC30-D9:N2-D9	C18715	C18715	C22H19Cl2NO3	M+H	30.5	6.8	-5.11698	51.7353	alpha-Cypermethrin; Alphamethrin;	null	null	null	416.079	NA	0.7112	1	NULL
0.53_263.0800m/z	0.71_416.0794m/z	2.46077	0.0351476	2.60516	NC30-D9:N2-D9	C10984	C10984	C22H19Cl2NO3	M+H	30.5	6.8	-5.11698	51.7353	Cypermethrin;	null	null	null	416.079	NA	0.7112	1	NULL
0.55_260.0437n	0.74_128.1064m/z	3.04946	0.0168968	2.54799	NC30-D9:N2-D9	C11519	C11519	C7H13NO	M+H	37.4	0	-4.41688	92.0659	N-Cyclohexylformamide;	null	null	null	128.106	NA	0.739767	1	map00930 Caprolactam degradation; map01120 Microbial metabolism in diverse environments
0.56_226.0378m/z	0.74_145.1330m/z	2.17254	0.0483441	1.8685	NC30-D9:N2-D9	C11519	C11519	C7H13NO	M+NH4	38.9	2.25	-4.04258	97.0457	N-Cyclohexylformamide;	null	null	null	145.133	NA	0.739767	1	map00930 Caprolactam degradation; map01120 Microbial metabolism in diverse environments
0.59_106.0863m/z	1.15_112.0269n	1.81263	0.0201375	1.82411	NC30-D9:N2-D9	C18474	C18474	C4H4N2O2	M+H-H2O, M+H	39.1	0	-3.45983	99.563	Maleic hydrazide;	null	null	null	113.035	112.027	1.14622	1	NULL
0.59_151.9822m/z	1.15_112.0269n	1.81263	0.0201375	1.82411	NC30-D9:N2-D9	C00106	C00106	C4H4N2O2	M+H-H2O, M+H	39.1	0	-3.45983	99.563	Uracil;	Organoheterocyclic compounds	Diazines	Pyrimidines and pyrimidine derivatives	113.035	112.027	1.14622	1	map00240 Pyrimidine metabolism; map00410 beta-Alanine metabolism; map00770 Pantothenate and CoA biosynthesis; map01100 Metabolic pathways
0.59_170.1039n	1.15_311.0299m/z	1.55114	0.0309391	1.44027	NC30-D9:N2-D9	C01263	C01263	C15H12O5	M+K	36.9	0	-6.282	91.3977	3,6,9-Trihydroxypterocarpan; (6aS,11aS)-3,6a,9-Trihydroxypterocarpan; (-)-Glycinol;	null	null	null	311.03	NA	1.14622	1	map00943 Isoflavonoid biosynthesis; map01110 Biosynthesis of secondary metabolites
0.59_280.0947m/z	1.15_311.0299m/z	1.55114	0.0309391	1.44027	NC30-D9:N2-D9	C09047	C09047	C15H12O5	M+K	36.9	0	-6.282	91.3977	Rubrofusarin;	null	null	null	311.03	NA	1.14622	1	NULL
0.60_142.0265m/z	1.15_311.0299m/z	1.55114	0.0309391	1.44027	NC30-D9:N2-D9	C06561	C06561	C15H12O5	M+K	36.9	0	-6.282	91.3977	Naringenin chalcone; 2',4,4',6'-Tetrahydroxychalcone; Isosalipurpol; Chalconaringenin;	Phenylpropanoids and polyketides	Linear 1,3-diarylpropanoids	Chalcones and dihydrochalcones	311.03	NA	1.14622	1	map00941 Flavonoid biosynthesis; map01061 Biosynthesis of phenylpropanoids; map01100 Metabolic pathways; map01110 Biosynthesis of secondary metabolites
0.62_184.0726m/z	1.15_311.0299m/z	1.55114	0.0309391	1.44027	NC30-D9:N2-D9	C09614	C09614	C15H12O5	M+K	36.9	0	-6.282	91.3977	Butin; (-)-Butin; 7,3',4'-Trihydroxyflavanone;	null	null	null	311.03	NA	1.14622	1	map00941 Flavonoid biosynthesis
0.62_184.1044m/z	1.15_311.0299m/z	1.55114	0.0309391	1.44027	NC30-D9:N2-D9	C09826	C09826	C15H12O5	M+K	36.9	0	-6.282	91.3977	Pinobanksin; 3,5,7-Trihydroxyflavanone;	null	null	null	311.03	NA	1.14622	1	map00941 Flavonoid biosynthesis
0.63_124.9996m/z	1.15_311.0299m/z	1.55114	0.0309391	1.44027	NC30-D9:N2-D9	C00509	C00509	C15H12O5	M+K	36.9	0	-6.282	91.3977	Naringenin; 4',5,7-Trihydroxyflavanone; (2S)-Naringenin; (-)-(2S)-Naringenin;	Phenylpropanoids and polyketides	Flavonoids	Flavans	311.03	NA	1.14622	1	map00941 Flavonoid biosynthesis; map00943 Isoflavonoid biosynthesis; map01061 Biosynthesis of phenylpropanoids; map01100 Metabolic pathways; map01110 Biosynthesis of secondary metabolites
0.65_378.1128m/z	1.15_311.0299m/z	1.55114	0.0309391	1.44027	NC30-D9:N2-D9	C01592	C01592	C15H12O5	M+K	36.9	0	-6.282	91.3977	Licodione; 1-(2,4-Dihydroxyphenyl)-3-(4-hydroxyphenyl)propane-1,3-dione;	null	null	null	311.03	NA	1.14622	1	NULL
0.66_118.0865m/z	1.15_311.0299m/z	1.55114	0.0309391	1.44027	NC30-D9:N2-D9	C03567	C03567	C15H12O5	M+K	36.9	0	-6.282	91.3977	2'-Hydroxydihydrodaidzein; 2'-Hydroxy-2,3-dihydrodaidzein;	Phenylpropanoids and polyketides	Isoflavonoids	Isoflavans	311.03	NA	1.14622	1	map00943 Isoflavonoid biosynthesis; map01110 Biosynthesis of secondary metabolites
0.68_258.9729m/z	1.15_311.0299m/z	1.55114	0.0309391	1.44027	NC30-D9:N2-D9	C15567	C15567	C15H12O5	M+K	36.9	0	-6.282	91.3977	2,7,4'-Trihydroxyisoflavanone; 2,4',7-Trihydroxyisoflavanone;	null	null	null	311.03	NA	1.14622	1	map00943 Isoflavonoid biosynthesis; map01110 Biosynthesis of secondary metabolites
0.68_391.1886m/z	1.15_311.0299m/z	1.55114	0.0309391	1.44027	NC30-D9:N2-D9	C16232	C16232	C15H12O5	M+K	36.9	0	-6.282	91.3977	6,7,4'-Trihydroxyflavanone;	null	null	null	311.03	NA	1.14622	1	map00943 Isoflavonoid biosynthesis; map01110 Biosynthesis of secondary metabolites
0.69_199.9861m/z	1.15_311.0299m/z	1.55114	0.0309391	1.44027	NC30-D9:N2-D9	C12087	C12087	C15H12O5	M+K	36.9	0	-6.282	91.3977	p-Coumaroyltriacetic acid lactone;	null	null	null	311.03	NA	1.14622	1	NULL
0.69_228.0485m/z	1.15_311.0299m/z	1.55114	0.0309391	1.44027	NC30-D9:N2-D9	C08578	C08578	C15H12O5	M+K	36.9	0	-6.282	91.3977	Butein;	null	null	null	311.03	NA	1.14622	1	map00941 Flavonoid biosynthesis
0.69_259.1615n	1.15_311.0299m/z	1.55114	0.0309391	1.44027	NC30-D9:N2-D9	C17673	C17673	C15H12O5	M+K	36.9	0	-6.282	91.3977	Toralactone;	Organoheterocyclic compounds	Naphthopyrans	Naphthopyranones	311.03	NA	1.14622	1	NULL
0.71_215.9932m/z	1.15_311.0299m/z	1.55114	0.0309391	1.44027	NC30-D9:N2-D9	C14458	C14458	C15H12O5	M+K	36.9	0	-6.282	91.3977	Dihydrogenistein; 4',5,7-Trihydroxyisoflavan-4-one;	Phenylpropanoids and polyketides	Isoflavonoids	Isoflavans	311.03	NA	1.14622	1	NULL
0.71_416.0794m/z	1.15_311.0299m/z	1.55114	0.0309391	1.44027	NC30-D9:N2-D9	C09751	C09751	C15H12O5	M+K	36.9	0	-6.282	91.3977	Garbanzol; 3,7,4'-Trihydroxyflavanone;	null	null	null	311.03	NA	1.14622	1	map00941 Flavonoid biosynthesis
0.73_179.6095m/z	1.16_253.9841m/z	1.4882	0.0344665	1.53895	NC30-D9:N2-D9	C06055	C06055	C4H10NO7P	M+K	35.6	0	6.72768	85.4891	O-Phospho-4-hydroxy-L-threonine; 4-(Phosphonooxy)-threonine; 4-(Phosphonooxy)-L-threonine; 4-Phosphooxy-L-threonine;	Organic acids and derivatives	Carboxylic acids and derivatives	Amino acids, peptides, and analogues	253.984	NA	1.16052	1	map00750 Vitamin B6 metabolism; map01100 Metabolic pathways
0.73_341.1686n	1.16_323.9757m/z	1.68947	0.0461446	1.72732	NC30-D9:N2-D9	C05155	C05155	C10H8ClN3O5	M+K	36.2	24.1	-9.61833	67.1722	5-Amino-4-chloro-2-(5-hydroxymuconoyl)-3(2H)-pyridazinone; 5-Amino-4-chloro-2-(2-hydroxymuconoyl)-3(2H)-pyridazinone;	null	null	null	323.976	NA	1.16052	1	NULL
0.73_776.2308n	1.35_145.1330m/z	3.30149	0.0405753	3.01065	NC30-D9:N2-D9	C11519	C11519	C7H13NO	M+NH4	38.1	0	-4.11012	95.4855	N-Cyclohexylformamide;	null	null	null	145.133	NA	1.34623	1	map00930 Caprolactam degradation; map01120 Microbial metabolism in diverse environments
0.74_128.1064m/z	1.72_300.1422m/z	1.96219	0.0351518	1.33779	NC30-D9:N2-D9	C00939	C00939	C10H14N6O4	M+NH4	36.8	0	2.52317	86.8746	2-Aminoadenosine;	null	null	null	300.142	NA	1.72412	1	NULL
0.74_145.1330m/z	1.79_152.9465m/z	1.65816	0.0261101	1.56427	NC30-D9:N2-D9	C18586	C18586	C2H2CaO4	M+Na	35.8	0	-4.6614	84.4774	Calcium formate; Formic acid, calcium salt;	null	null	null	152.947	NA	1.7877	1	NULL
0.74_184.1135n	1.84_110.0347m/z	1.68161	0.045038	1.38805	NC30-D9:N2-D9	C05516	C05516	C4H5N3O2	M+H-H2O	43.3	19.3	-1.51396	99.1497	5-Amino-4-imidazole carboxylate; 4-Amino-5-imidazolecarboxylic acid;	null	null	null	110.035	NA	1.84485	1	map00230 Purine metabolism
1.15_112.0269n	1.84_153.0405m/z	1.81723	0.0347322	1.52738	NC30-D9:N2-D9	C05515	C05515	C5H6N4O3	M+H-H2O	43.1	17	-1.09689	99.6219	5-Ureido-4-imidazole carboxylate; 4-Ureido-5-imidazolecarboxylic acid;	null	null	null	153.041	NA	1.84485	1	map00230 Purine metabolism
1.15_311.0299m/z	10.04_373.2596m/z	0.74249	0.0174005	1.2236	NC30-D9:N2-D9	C11989	C11989	C20H36O6	M+H	38.2	11.4	3.05512	83.429	8,8a-Deoxyoleandolide;	null	null	null	373.26	NA	10.0385	1	map00522 Biosynthesis of 12-, 14- and 16-membered macrolides; map01130 Biosynthesis of antibiotics
1.16_253.9841m/z	10.05_321.1441m/z	0.639518	0.018335	1.55387	NC30-D9:N2-D9	C21495	C21495	C19H22O3	M+Na	35.7	5.1	-6.91291	81.219	8-Geranylumbelliferone;	null	null	null	321.144	NA	10.0532	1	NULL
1.16_323.9757m/z	10.05_321.1441m/z	0.639518	0.018335	1.55387	NC30-D9:N2-D9	C09281	C09281	C19H22O3	M+Na	35.7	5.1	-6.91291	81.219	Ostruthin;	null	null	null	321.144	NA	10.0532	1	NULL
1.35_145.1330m/z	10.10_496.1617m/z	0.685739	0.0355313	1.35885	NC30-D9:N2-D9	C12432	C12432	C26H27NO10	M+H-H2O	36	0	2.97906	83.53	Carminomycin;	null	null	null	496.162	NA	10.0992	1	map01057 Biosynthesis of type II polyketide products; map01130 Biosynthesis of antibiotics
1.68_121.9713m/z	10.15_267.2048m/z	0.757063	0.0343913	1.12911	NC30-D9:N2-D9	C17463	C17463	C15H23NO2	M+NH4	38.2	4.47	-7.65925	94.945	Nupharidine;	null	null	null	267.205	NA	10.1453	1	NULL
1.72_300.1422m/z	10.19_113.1323m/z	0.709506	0.0202009	1.03921	NC30-D9:N2-D9	C17144	C17144	C8H18O	M+H-H2O	38	0	-1.14607	91.3641	3-Octanol;	Lipids and lipid-like molecules	Fatty Acyls	Fatty alcohols	113.132	NA	10.1913	1	NULL
1.73_366.0094m/z	10.19_113.1323m/z	0.709506	0.0202009	1.03921	NC30-D9:N2-D9	C02498	C02498	C8H18O	M+H-H2O	38	0	-1.14607	91.3641	2-Ethylhexan-1-ol; 2-Ethyl-1-hexanol;	Lipids and lipid-like molecules	Fatty Acyls	Fatty alcohols	113.132	NA	10.1913	1	NULL
1.76_134.9863m/z	10.19_113.1323m/z	0.709506	0.0202009	1.03921	NC30-D9:N2-D9	C00756	C00756	C8H18O	M+H-H2O	38	0	-1.14607	91.3641	1-Octanol;	Lipids and lipid-like molecules	Fatty Acyls	Fatty alcohols	113.132	NA	10.1913	1	NULL
1.79_152.9465m/z	10.19_121.0282m/z	0.723848	0.0240611	1.04603	NC30-D9:N2-D9	C18316	C18316	C7H6O3	M+H-H2O	50.4	60.6	-1.37791	93.2201	2-Hydroxy-5-methylquinone; 2-Hydroxy-5-methyl-1,4-benzoquinone;	null	null	null	121.028	NA	10.1913	1	map00633 Nitrotoluene degradation; map01120 Microbial metabolism in diverse environments
1.84_110.0347m/z	10.21_413.1067m/z	0.681758	0.0335727	1.08358	NC30-D9:N2-D9	C09788	C09788	C16H22O11	M+Na	37.9	1.15	3.14858	92.2425	Monotropein;	null	null	null	413.107	NA	10.2067	1	NULL
1.84_153.0172n	10.24_114.0679n	0.661333	0.024483	1.18509	NC30-D9:N2-D9	C01880	C01880	C6H10O2	M+H-H2O, M+H	38.4	0	-1.15814	93.2143	epsilon-Caprolactone; 6-Hexanolide; 1-Oxa-2-oxocycloheptane; 2-Oxepanone; Hexano-6-lactone;	Organoheterocyclic compounds	Lactones	null	115.075	114.068	10.2369	1	map00930 Caprolactam degradation; map01120 Microbial metabolism in diverse environments; map01220 Degradation of aromatic compounds
1.84_153.0405m/z	10.24_114.0679n	0.661333	0.024483	1.18509	NC30-D9:N2-D9	C01147	C01147	C6H10O2	M+H-H2O, M+H	38.4	0	-1.15814	93.2143	2-Hydroxycyclohexan-1-one; 2-Hydroxycyclohexanone; Adipoin;	null	null	null	115.075	114.068	10.2369	1	map00930 Caprolactam degradation; map01120 Microbial metabolism in diverse environments
1.84_403.9886m/z	10.24_114.0679n	0.661333	0.024483	1.18509	NC30-D9:N2-D9	C03228	C03228	C6H10O2	M+H-H2O, M+H	38.4	0	-1.15814	93.2143	3-Hydroxycyclohexanone;	null	null	null	115.075	114.068	10.2369	1	NULL
10.01_257.2236m/z	10.24_175.0954m/z	0.624026	0.0168968	1.28671	NC30-D9:N2-D9	C11913	C11913	C8H16O5	M+H-H2O	37.3	0	-5.54625	92.9237	D-Mycinose; 6-Deoxy-2,3-di-O-methyl-D-allo-hexose;	null	null	null	175.095	NA	10.2369	1	NULL
10.04_373.2596m/z	10.24_307.2597m/z	0.750187	0.0177385	1.23166	NC30-D9:N2-D9	C01530	C01530	C18H36O2	M+Na	38	0	-3.85087	94.6366	Octadecanoic acid; Stearate; Stearic acid;	Lipids and lipid-like molecules	Fatty Acyls	Fatty acids and conjugates	307.26	NA	10.2369	1	map00061 Fatty acid biosynthesis; map01040 Biosynthesis of unsaturated fatty acids; map01060 Biosynthesis of plant secondary metabolites; map04745 Phototransduction - fly
10.05_321.1441m/z	10.24_307.2597m/z	0.750187	0.0177385	1.23166	NC30-D9:N2-D9	C20356	C20356	C18H36O2	M+Na	38	0	-3.85087	94.6366	Isooctadecanoic acid; Isostearic acid;	Lipids and lipid-like molecules	Fatty Acyls	Fatty acids and conjugates	307.26	NA	10.2369	1	NULL
10.07_534.4337m/z	10.24_514.2801m/z	0.709345	0.0168968	1.02253	NC30-D9:N2-D9	C16562	C16562	C20H41N7O5S	M+Na	27.8	4.91	3.84623	38.7383	Glutathionylspermine;	null	null	null	514.28	NA	10.2369	1	map00480 Glutathione metabolism
10.10_385.2900m/z	10.25_371.3645m/z	0.717604	0.0168968	1.06621	NC30-D9:N2-D9	C12978	C12978	C27H48O	M+H-H2O	36.5	0.42	-7.06357	89.8091	Epidihydrocholesterin; Epicholestanol;	Lipids and lipid-like molecules	Steroids and steroid derivatives	Cholestane steroids	371.364	NA	10.2523	1	NULL
10.10_496.1617m/z	10.27_341.2364m/z	0.784975	0.022041	1.15366	NC30-D9:N2-D9	C07542	C07542	C20H25N3O	M+NH4	35.2	3.18	8.57209	82.3171	Lysergic acid diethylamide; LSD; Lysergide;	null	null	null	341.236	NA	10.2676	1	NULL
10.13_386.1975n	10.28_497.1683m/z	0.714852	0.0172628	1.06922	NC30-D9:N2-D9	C20383	C20383	C23H28O12	M+H	30.8	0	5.86665	60.7285	Mycophenolic acid O-acyl-glucuronide;	Organic oxygen compounds	Organooxygen compounds	Carbohydrates and carbohydrate conjugates	497.168	NA	10.2829	1	NULL
10.13_454.1807n	10.28_641.4199m/z	0.74476	0.0168968	1.14421	NC30-D9:N2-D9	C08596	C08596	C42H58O6	M+H-H2O	36.2	0	-0.267096	81.1667	Fucoxanthin;	null	null	null	641.42	NA	10.2829	1	NULL
10.13_673.5139m/z	10.33_593.4133m/z	0.64995	0.017949	1.17327	NC30-D9:N2-D9	C15859	C15859	C40H58O	M+K	38.1	12.2	2.53994	81.1817	1'-Hydroxy-gamma-carotene;	null	null	null	593.413	NA	10.3278	1	map00906 Carotenoid biosynthesis
10.15_267.2048m/z	10.33_624.1750n	0.738032	0.0168968	1.01274	NC30-D9:N2-D9	C03184	C03184	C34H32N4O4Zn	M+NH4, M+Na, M+H-H2O	30.1	0	5.66454	56.7693	Zinc protoporphyrin-9; Zinc protoporphyrin;	null	null	null	642.209	624.175	10.3278	1	NULL
10.15_980.2542n	10.35_387.2769m/z	0.684827	0.0426963	1.29234	NC30-D9:N2-D9	C03240	C03240	C21H38O6	M+H	41.9	32.7	7.1672	84.9881	6-Deoxyerythronolide B;	null	null	null	387.277	NA	10.3491	1	map00522 Biosynthesis of 12-, 14- and 16-membered macrolides; map01130 Biosynthesis of antibiotics
10.19_113.1323m/z	10.35_676.4207m/z	0.70189	0.0244614	1.23528	NC30-D9:N2-D9	C15757	C15757	C34H59N3O9	M+Na	36.9	3.05	9.67215	92.11	Enniatin B4; Enniatin D;	null	null	null	676.421	NA	10.3491	1	NULL
10.19_121.0282m/z	10.36_163.9992m/z	0.741586	0.0168968	1.10744	NC30-D9:N2-D9	C10910	C10910	C8H7NS2	M+H-H2O	36.3	0	2.99987	84.8552	2-Methylthiobenzothiazole;	null	null	null	163.999	NA	10.3644	1	NULL
10.19_436.3952m/z	10.36_305.0150m/z	0.697919	0.0444089	1.03933	NC30-D9:N2-D9	C15411	C15411	C14H14Cl2N	M+K	28.8	0	5.71832	50.5014	beta-Chloro-alpha-phenylbenzeneethanamine hydrochloride; 2-Chloro-1,2-diphenylethylamine hydrochloride;	null	null	null	305.015	NA	10.3644	1	NULL
10.21_413.1067m/z	10.36_399.1192m/z	0.583712	0.0309829	1.41097	NC30-D9:N2-D9	C06628	C06628	C20H15NO7	M+NH4	37.4	0	1.36154	88.3992	4-Hydroxy-6-methylpretetramide; 1,3,4,10,11,12-Hexahydroxy-6-methyltetracene-2-carboxamide;	null	null	null	399.119	NA	10.3644	1	map00253 Tetracycline biosynthesis; map01057 Biosynthesis of type II polyketide products; map01130 Biosynthesis of antibiotics
10.24_114.0679n	10.36_551.5025m/z	0.64825	0.0290308	1.11421	NC30-D9:N2-D9	C13864	C13864	C35H66O4	M+H	37.9	7.4	-1.63369	84.2638	1-O-(1Z-Tetradecenyl)-2-(9Z-octadecenoyl)-sn-glycerol;	null	null	null	551.502	NA	10.3644	1	NULL
10.24_175.0954m/z	10.36_783.4492m/z	0.647963	0.0216249	1.18316	NC30-D9:N2-D9	C12020	C12020	C42H59N3O10	M+NH4	37.7	11.6	-6.12566	83.9488	Cethromycin; ABT-773; A-195773; Abbott-195773;	null	null	null	783.449	NA	10.3644	1	NULL
10.24_307.2597m/z	10.38_605.4246m/z	0.693722	0.0245617	1.07416	NC30-D9:N2-D9	C13493	C13493	C30H62O10	M+Na	36.4	7.95	1.82379	76.3879	Polidocanol; Nonaethylene glycol monododecyl ether;	null	null	null	605.425	NA	10.3791	1	NULL
10.24_371.5127m/z	10.67_716.3106m/z	0.597589	0.0333501	1.31876	NC30-D9:N2-D9	C16523	C16523	C40H47NO12	M+H-H2O	33.5	0	5.58051	73.9412	3'-N-Debenzoyl-2'-deoxytaxol; beta-Phenylalanoyl baccatin III; 13-O-beta-Phenylalanoylbaccatin III;	null	null	null	716.311	NA	10.6725	1	map00904 Diterpenoid biosynthesis; map01110 Biosynthesis of secondary metabolites
10.24_514.2801m/z	10.71_492.1911m/z	0.640101	0.0168968	1.3868	NC30-D9:N2-D9	C11814	C11814	C24H29NO10	M+H	38.2	46.2	9.46905	55.3145	Demethylisoalangiside;	null	null	null	492.191	NA	10.7083	1	map00950 Isoquinoline alkaloid biosynthesis
10.24_602.2073m/z	10.71_492.1911m/z	0.640101	0.0168968	1.3868	NC30-D9:N2-D9	C11813	C11813	C24H29NO10	M+H	38.2	46.2	9.46905	55.3145	Demethylalangiside;	null	null	null	492.191	NA	10.7083	1	map00950 Isoquinoline alkaloid biosynthesis
10.24_724.6427n	10.73_582.2771m/z	0.690227	0.0176608	1.1179	NC30-D9:N2-D9	C00413	C00413	C21H39N7O12	M+H	35.5	0	7.18182	85.4132	Streptomycin;	Organic oxygen compounds	Organooxygen compounds	Carbohydrates and carbohydrate conjugates	582.277	NA	10.7255	1	map00521 Streptomycin biosynthesis; map01130 Biosynthesis of antibiotics
10.25_371.3645m/z	10.88_622.4032m/z	0.751095	0.0246864	1.09121	NC30-D9:N2-D9	C15740	C15740	C33H57N3O9	M+H-H2O	24.5	0	-4.71165	28.1519	Enniatin B;	null	null	null	622.403	NA	10.8827	1	NULL
10.27_341.2364m/z	10.93_814.2063n	0.60061	0.0176608	1.12417	NC30-D9:N2-D9	C08443	C08443	C31H45Cl3N6O13	M+NH4, M+Na	30.1	0	-5.82527	56.9959	Victorin C;	null	null	null	832.24	814.206	10.9298	1	NULL
10.28_497.1683m/z	10.99_645.4933m/z	0.766313	0.0168968	1.03758	NC30-D9:N2-D9	C16841	C16841	C34H65N3O5S	M+NH4	41.4	29.8	-7.97987	86.2202	Squalamine;	null	null	null	645.493	NA	10.9934	1	NULL
10.28_641.4199m/z	11.04_442.2404m/z	0.726122	0.0204348	1.11287	NC30-D9:N2-D9	C07966	C07966	C26H34FNO5	M+H-H2O	25.6	0	3.45884	32.0864	Cerivastatin;	null	null	null	442.24	NA	11.0402	1	map04976 Bile secretion
10.28_653.4876m/z	11.06_766.5384m/z	5.49178	0.0481452	2.82628	NC30-D9:N2-D9	C06838	C06838	C38H72N2O12	M+NH4	42.4	22.3	-5.22259	95.5604	Azithromycin;	null	null	null	766.538	NA	11.0558	1	NULL
10.30_311.2896m/z	11.07_210.1496m/z	0.640672	0.0176078	1.16049	NC30-D9:N2-D9	C21199	C21199	C12H21NO3	M+H-H2O	36.2	0	3.33916	85.0328	N-Octanoyl-L-homoserine lactone; C8-HSL; N-[(3S)-Tetrahydro-2-oxo-3-furanyl]octanamide;	null	null	null	210.15	NA	11.0717	1	map02024 Quorum sensing
10.33_257.0308m/z	11.09_602.3623n	0.767039	0.0416479	1.00956	NC30-D9:N2-D9	C09929	C09929	C38H50O6	M+H-H2O, M+Na	33.6	3.04	2.60761	68.0687	Garcinol;	null	null	null	625.423	602.362	11.0933	1	NULL
10.33_276.0349n	11.09_602.3623n	0.767039	0.0416479	1.00956	NC30-D9:N2-D9	C09979	C09979	C38H50O6	M+H-H2O, M+Na	33.6	3.04	2.60761	68.0687	Xanthochymol;	null	null	null	625.423	602.362	11.0933	1	NULL
10.33_593.4133m/z	11.16_593.1518m/z	0.618898	0.0336996	1.30688	NC30-D9:N2-D9	C05625	C05625	C27H30O16	M+H-H2O	30.3	28.5	2.84167	26.1083	Rutin; 3-[[6-O-(6-Deoxy-alpha-L-mannopyranosyl)-beta-D-glucopyranosyl]oxy]-2-(3,4-dihydroxyphenyl)-5,7-dihydroxy-4H-1-benzopyran-4-one; Quercetin 3-rutinoside; Rutoside; Phytomelin;	Phenylpropanoids and polyketides	Flavonoids	Flavonoid glycosides	593.152	NA	11.1557	1	map00944 Flavone and flavonol biosynthesis; map01100 Metabolic pathways; map01110 Biosynthesis of secondary metabolites
10.33_624.1750n	11.16_593.1518m/z	0.618898	0.0336996	1.30688	NC30-D9:N2-D9	C19796	C19796	C27H30O16	M+H-H2O	30.3	28.5	2.84167	26.1083	Quercetin 3-O-rhamnoside 7-O-glucoside;	null	null	null	593.152	NA	11.1557	1	map00944 Flavone and flavonol biosynthesis
10.35_387.2769m/z	11.25_361.2704m/z	0.737242	0.0175098	1.18586	NC30-D9:N2-D9	C19426	C19426	C21H38O3	M+Na	35.5	0.316	-2.67311	80.3262	Glycidyl oleate;	null	null	null	361.27	NA	11.2508	1	NULL
10.35_676.4207m/z	11.25_387.0568m/z	0.58737	0.025909	1.24925	NC30-D9:N2-D9	C04839	C04839	C12H20O13S	M+H-H2O	35.4	0	-5.8048	83.5023	3-O-(3,6-Anhydro-alpha-D-galactopyranosyl)-D-galactose 4-O-sulfate;	null	null	null	387.057	NA	11.2508	1	NULL
10.35_758.1974n	11.36_297.0436m/z	0.621763	0.0215064	1.12983	NC30-D9:N2-D9	C06921	C06921	C16H11ClN2O3	M+H-H2O	33.4	0	3.24596	70.6469	Clorazepate; Clorazepic acid;	Organoheterocyclic compounds	Benzodiazepines	1,4-benzodiazepines	297.044	NA	11.3603	1	NULL
10.36_163.9992m/z	11.36_313.0377m/z	0.672855	0.0170846	1.0343	NC30-D9:N2-D9	C13835	C13835	C14H10ClF3N2O2	M+H-H2O	33.3	0	8.23584	75.429	NS 1608;	null	null	null	313.038	NA	11.3603	1	NULL
10.36_290.2812n	11.36_315.0183m/z	0.641591	0.0185066	1.13624	NC30-D9:N2-D9	C19600	C19600	C14H10CaO6	M+H	38.1	0	2.05678	93.0894	Calcium salicylate;	null	null	null	315.018	NA	11.3603	1	NULL
10.36_305.0150m/z	11.38_359.0590m/z	0.619118	0.0479463	1.05946	NC30-D9:N2-D9	C21113	C21113	C11H17N2O8P	M+Na	42.1	32.6	-7.409	86.3461	NMNH; Reduced nicotinamide nucleotide;	null	null	null	359.059	NA	11.3758	1	NULL
10.36_399.1192m/z	11.38_429.0848m/z	0.472039	0.0421503	1.39232	NC30-D9:N2-D9	C09795	C09795	C18H22O11S	M+H-H2O	36.3	6.24	-0.510596	75.9853	Paederoside;	null	null	null	429.085	NA	11.3758	1	NULL
10.36_551.5025m/z	11.41_466.3812m/z	0.632468	0.0168968	1.16697	NC30-D9:N2-D9	C09903	C09903	C30H49N3O2	M+H-H2O	37.1	0	4.18517	90.4182	Spirolucidine;	null	null	null	466.381	NA	11.4063	1	NULL
10.36_618.3790n	11.41_466.3812m/z	0.632468	0.0168968	1.16697	NC30-D9:N2-D9	C09891	C09891	C30H49N3O2	M+H-H2O	37.1	0	4.18517	90.4182	Oxolucidine B; Serratanine B;	null	null	null	466.381	NA	11.4063	1	NULL
10.36_653.4131m/z	11.44_455.4076m/z	0.672522	0.0168968	1.06392	NC30-D9:N2-D9	C22000	C22000	C28H54O4	M+H	36.1	0	-4.20508	85.2389	(R)-3-(Tetradecanoyloxy)tetradecanoic acid; (R)-3-(Myristoyloxy)myristic acid;	null	null	null	455.408	NA	11.4375	1	NULL
10.36_680.4736m/z	11.75_315.0178m/z	0.68568	0.0187273	1.01541	NC30-D9:N2-D9	C19600	C19600	C14H10CaO6	M+H	37.2	0	0.710395	86.6836	Calcium salicylate;	null	null	null	315.018	NA	11.752	1	NULL
10.36_783.4492m/z	12.33_519.4543m/z	0.787544	0.0390309	1.05537	NC30-D9:N2-D9	C13821	C13821	C32H64O2	M+K	38.3	0	1.1408	92.813	1-Hexadecyl hexadecanoate;	null	null	null	519.454	NA	12.3308	1	NULL
10.36_945.6936m/z	12.39_291.1115m/z	0.605799	0.0230578	1.3969	NC30-D9:N2-D9	C07541	C07541	C16H16N2O2	M+Na	45.6	43	4.27888	90.175	Lysergic acid;	null	null	null	291.112	NA	12.3924	1	NULL
10.38_605.4246m/z	12.63_938.2594m/z	0.534713	0.0228675	1.62035	NC30-D9:N2-D9	C16243	C16243	C43H50CoN4O16	M+H	37.3	2.08	-3.43036	88.4568	Cobalt-precorrin 5B;	null	null	null	938.259	NA	12.6316	1	map00860 Porphyrin and chlorophyll metabolism; map01100 Metabolic pathways
10.38_628.4918n	12.69_291.1119m/z	0.617736	0.0259284	1.20305	NC30-D9:N2-D9	C07541	C07541	C16H16N2O2	M+Na	41.1	20.5	5.48178	91.0708	Lysergic acid;	null	null	null	291.112	NA	12.6937	1	NULL
10.39_623.4010m/z	12.86_272.9461m/z	0.664721	0.0453437	1.03037	NC30-D9:N2-D9	C11536	C11536	C3H7O9PS	M+Na	36.4	0	7.97073	90.826	(2R)-O-Phospho-3-sulfolactate; (2R)-Phosphosulfolactate;	null	null	null	272.946	NA	12.8645	1	map00680 Methane metabolism; map01120 Microbial metabolism in diverse environments
10.53_570.1567m/z	12.88_406.1060m/z	0.703412	0.0355338	1.01935	NC30-D9:N2-D9	C13440	C13440	C18H19N3O6S	M+H	37	0.183	-1.91967	87.1865	Cefaloglycin; Cephaloglycin anhydrous;	Organoheterocyclic compounds	Lactams	Beta lactams	406.106	NA	12.8805	1	NULL
10.67_276.0355n	12.90_246.9418m/z	0.673754	0.0382695	1.02993	NC30-D9:N2-D9	C06696	C06696	Pb	M+K	18.1	0	9.54255	0.927152	Lead; Pb; Pb2+;	null	null	null	246.942	NA	12.8963	1	map02020 Two-component system
10.67_438.1303n	12.98_465.1662m/z	0.690201	0.0203097	1.03775	NC30-D9:N2-D9	C21516	C21516	C23H27FN4O3	M+K	33.2	6.48	-8.69558	69.1581	Paliperidone; 9-Hydroxyrisperidone;	Organoheterocyclic compounds	Pyridopyrimidines	null	465.166	NA	12.9806	1	NULL
10.67_485.3712m/z	13.00_553.4583m/z	0.50169	0.0480623	1.65426	NC30-D9:N2-D9	C08484	C08484	C35H62O3	M+Na	37.4	0	-1.54387	88.9863	Epoxymurin-A;	Lipids and lipid-like molecules	Fatty Acyls	Fatty alcohols	553.458	NA	12.9965	1	NULL
10.67_682.2182n	2.17_267.0564m/z	2.3894	0.0250105	1.12671	NC30-D9:N2-D9	C19314	C19314	C18H12	M+K	37.3	0	-2.79301	89.9668	Acepyrene; 3,4-Dihydrocyclopenta[cd]pyrene;	null	null	null	267.056	NA	2.16558	1	NULL
10.67_716.3106m/z	2.17_267.0564m/z	2.3894	0.0250105	1.12671	NC30-D9:N2-D9	C14222	C14222	C18H12	M+K	37.3	0	-2.79301	89.9668	Chrysene; 1,2-Benzophenanthrene; Benz[a]phenanthrene;	null	null	null	267.056	NA	2.16558	1	NULL
10.71_492.1911m/z	2.17_267.0564m/z	2.3894	0.0250105	1.12671	NC30-D9:N2-D9	C19541	C19541	C18H12	M+K	37.3	0	-2.79301	89.9668	Triphenylene;	null	null	null	267.056	NA	2.16558	1	NULL
10.73_571.1869m/z	2.17_267.0564m/z	2.3894	0.0250105	1.12671	NC30-D9:N2-D9	C19197	C19197	C18H12	M+K	37.3	0	-2.79301	89.9668	Benzo[c]phenanthrene; 3,4-Benzphenanthrene;	null	null	null	267.056	NA	2.16558	1	NULL
10.73_582.2771m/z	2.17_267.0564m/z	2.3894	0.0250105	1.12671	NC30-D9:N2-D9	C14317	C14317	C18H12	M+K	37.3	0	-2.79301	89.9668	Benz[a]anthracene; 1,2-Benzanthracene;	null	null	null	267.056	NA	2.16558	1	NULL
10.77_594.2049m/z	2.17_344.9992m/z	2.63758	0.0194608	1.37937	NC30-D9:N2-D9	C04524	C04524	C14H10O8	M+K	40	10.4	-5.02619	95.5509	2-Protocatechoylphloroglucinolcarboxylate; 2-(3,4-Dihydroxybenzoyloxy)-4,6-dihydroxybenzoate;	Phenylpropanoids and polyketides	Depsides and depsidones	null	344.999	NA	2.16558	1	NULL
10.79_629.5430m/z	2.18_113.0344m/z	2.38425	0.0355338	1.15065	NC30-D9:N2-D9	C20254	C20254	C4H6N2O3	M+H-H2O	39.6	0	-1.1315	99.2035	Ureidoacrylate; (Z)-3-Ureidoacrylate;	null	null	null	113.034	NA	2.17987	1	map00240 Pyrimidine metabolism
10.88_622.4032m/z	2.21_411.0212m/z	8.73792	0.031976	2.74073	NC30-D9:N2-D9	C08065	C08065	C19H17Cl3N2S	M+H	25.8	0	-9.51291	39.5209	Butoconazole;	Benzenoids	Benzene and substituted derivatives	Phenylbutylamines	411.021	NA	2.20843	1	NULL
10.93_814.2063n	2.27_364.0630m/z	2.15131	0.0385754	1.02154	NC30-D9:N2-D9	C03410	C03410	C11H19NO10	M+K	38.7	0	-3.37338	97.5385	N-Glycoloyl-neuraminate; N-Glycolylneuraminate; Neu5Gc;	Organooxygen compounds	Carbohydrates and carbohydrate conjugates	Sugar acids and derivatives	364.063	NA	2.26558	1	map00520 Amino sugar and nucleotide sugar metabolism
10.99_645.4933m/z	3.26_385.1266m/z	7.43173	0.0168968	3.22065	NC30-D9:N2-D9	C09138	C09138	C19H22O7	M+Na	35.1	0	2.21739	78.3569	Nagilactone C;	null	null	null	385.127	NA	3.25637	1	NULL
11.04_442.2404m/z	3.26_385.1266m/z	7.43173	0.0168968	3.22065	NC30-D9:N2-D9	C11870	C11870	C19H22O7	M+Na	35.1	0	2.21739	78.3569	Gibberellin A8-catabolite;	null	null	null	385.127	NA	3.25637	1	map00904 Diterpenoid biosynthesis
11.06_766.5384m/z	3.31_238.1427m/z	0.637542	0.0168968	1.13065	NC30-D9:N2-D9	C18830	C18830	C11H21NO3	M+Na	42	44.8	6.15056	72.122	Ethyl 3-(N-butylacetamido)propionate; Ethyl butylacetylaminopropionate;	null	null	null	238.143	NA	3.31352	1	NULL
11.07_210.1496m/z	3.31_304.0939m/z	3.73765	0.0168968	3.24272	NC30-D9:N2-D9	C12236	C12236	C17H15NO3	M+Na	37.9	0	-1.80863	91.8558	Oxoassoanine; Dihydropratosine;	null	null	null	304.094	NA	3.31352	1	NULL
11.07_834.5630m/z	3.31_304.0939m/z	3.73765	0.0168968	3.24272	NC30-D9:N2-D9	C10572	C10572	C17H15NO3	M+Na	37.9	0	-1.80863	91.8558	Balsoxine; 2-Phenyl-5-(3,4-dimethoxyphenyl)oxazole;	null	null	null	304.094	NA	3.31352	1	NULL
11.09_564.4340m/z	3.31_304.0939m/z	3.73765	0.0168968	3.24272	NC30-D9:N2-D9	C09338	C09338	C17H15NO3	M+Na	37.9	0	-1.80863	91.8558	Annolobine; Anolobine;	null	null	null	304.094	NA	3.31352	1	NULL
11.09_602.3623n	3.31_304.0939m/z	3.73765	0.0168968	3.24272	NC30-D9:N2-D9	C16997	C16997	C17H15NO3	M+Na	37.9	0	-1.80863	91.8558	Michelalbine;	null	null	null	304.094	NA	3.31352	1	NULL
11.12_531.4698m/z	3.36_267.9864m/z	1.40986	0.0336206	1.0468	NC30-D9:N2-D9	C11536	C11536	C3H7O9PS	M+NH4	33.8	0	-9.09819	79.04	(2R)-O-Phospho-3-sulfolactate; (2R)-Phosphosulfolactate;	null	null	null	267.986	NA	3.35637	1	map00680 Methane metabolism; map01120 Microbial metabolism in diverse environments
11.12_590.4813m/z	3.36_414.0081m/z	3.49373	0.0216897	2.57741	NC30-D9:N2-D9	C17945	C17945	C10H15N3O12P2	M+H-H2O	41.4	18.2	-3.95981	93.243	Phosphonoformyl-CMP; CMP-5'-phosphonoformate;	null	null	null	414.008	NA	3.35637	1	map00440 Phosphonate and phosphinate metabolism; map01130 Biosynthesis of antibiotics
11.16_578.2124m/z	3.36_445.1978m/z	4.75475	0.0168968	2.70034	NC30-D9:N2-D9	C15256	C15256	C23H31FO6	M+Na	26.8	0	-4.37791	38.9873	6alpha-Fluoro-17-hydroxycorticosterone 21-acetate; 6alpha-Fluoro-11beta,17,21-trihydroxypregn-4-ene-3,20-dione 21-acetate;	null	null	null	445.198	NA	3.35637	1	NULL
11.16_593.1518m/z	3.36_445.1978m/z	4.75475	0.0168968	2.70034	NC30-D9:N2-D9	C08186	C08186	C23H31FO6	M+Na	26.8	0	-4.37791	38.9873	Fludrocortisone acetate;	null	null	null	445.198	NA	3.35637	1	NULL
11.16_606.5535n	3.37_119.0352m/z	1.98162	0.018323	1.20945	NC30-D9:N2-D9	C21649	C21649	C4H8O5	M+H-H2O	41.2	19.7	9.76784	96.8452	D-Threonate; (2S,3R)-2,3,4-Trihydroxybutanoate;	Organic oxygen compounds	Organooxygen compounds	Carbohydrates and carbohydrate conjugates	119.035	NA	3.37065	1	NULL
11.17_540.4421m/z	3.37_119.0352m/z	1.98162	0.018323	1.20945	NC30-D9:N2-D9	C01620	C01620	C4H8O5	M+H-H2O	41.2	19.7	9.76784	96.8452	Threonate; L-Threonate; (2R,3S)-2,3,4-Trihydroxybutanoic acid;	Organic oxygen compounds	Organooxygen compounds	Carbohydrates and carbohydrate conjugates	119.035	NA	3.37065	1	map00053 Ascorbate and aldarate metabolism
11.17_716.1927m/z	3.37_119.0352m/z	1.98162	0.018323	1.20945	NC30-D9:N2-D9	C21593	C21593	C4H8O5	M+H-H2O	41.2	19.7	9.76784	96.8452	D-Erythronate; (2R,3R)-2,3,4-Trihydroxybutanoate;	Organic oxygen compounds	Organooxygen compounds	Carbohydrates and carbohydrate conjugates	119.035	NA	3.37065	1	NULL
11.22_556.4623m/z	3.37_127.0380n	2.09525	0.0168968	1.23942	NC30-D9:N2-D9	C16621	C16621	C4H5N3O2	M+H-H2O, M+H	39.5	0	-1.29574	99.0881	1-Methyl-4-nitroimidazole;	Organoheterocyclic compounds	Azoles	Imidazoles	110.035	127.038	3.37065	1	map00983 Drug metabolism - other enzymes
11.22_980.2540n	3.37_127.0380n	2.09525	0.0168968	1.23942	NC30-D9:N2-D9	C05516	C05516	C4H5N3O2	M+H-H2O, M+H	39.5	0	-1.29574	99.0881	5-Amino-4-imidazole carboxylate; 4-Amino-5-imidazolecarboxylic acid;	null	null	null	110.035	127.038	3.37065	1	map00230 Purine metabolism
11.24_643.2801m/z	3.37_137.0457m/z	2.87794	0.0168968	1.79393	NC30-D9:N2-D9	C00262	C00262	C5H4N4O	M+H	39.9	0	-0.554348	99.9776	Hypoxanthine; Purine-6-ol;	Organoheterocyclic compounds	Imidazopyrimidines	Purines and purine derivatives	137.046	NA	3.37065	1	map00230 Purine metabolism; map01100 Metabolic pathways
11.25_361.2704m/z	3.37_268.0803n	2.4793	0.0168968	1.56012	NC30-D9:N2-D9	C00294	C00294	C10H12N4O5	M+H, M+Na, M+K	41.8	11.5	-1.78035	99.4393	Inosine;	Nucleosides, nucleotides, and analogues	Purine nucleosides	null	269.088	268.08	3.37065	1	map00230 Purine metabolism; map01100 Metabolic pathways
11.25_387.0568m/z	3.37_384.0208m/z	1.74429	0.0200553	1.26798	NC30-D9:N2-D9	C12691	C12691	C13H12N3NaO6S	M+Na	35.5	0	-7.93789	86.1435	Cefacetrile sodium; Cephacetrile sodium;	null	null	null	384.021	NA	3.37065	1	NULL
11.30_646.4527n	3.37_399.0220n	2.82008	0.0168968	2.08491	NC30-D9:N2-D9	C13400	C13400	C12H14AlMgNO11	M+H, M+NH4	36.4	0	-3.15426	85.5531	Bufferin; Aspirin softam;	null	null	null	400.029	399.022	3.37065	1	NULL
11.30_647.5314m/z	3.37_410.0348m/z	2.36115	0.0168968	1.79674	NC30-D9:N2-D9	C08193	C08193	C6H11AuO5S	M+NH4	33.7	0.112	4.27709	73.4668	Aurothioglucose;	null	null	null	410.035	NA	3.37065	1	NULL
11.33_1110.2824n	3.38_187.1536m/z	2.33711	0.0203744	1.94726	NC30-D9:N2-D9	C02581	C02581	C8H18N4O	M+H	37.5	0	-9.4697	97.8219	Propanoylagmatine; Propionylagmatine;	null	null	null	187.154	NA	3.38495	1	NULL
11.34_589.5124m/z	3.45_431.1392m/z	3.26116	0.0294027	2.65436	NC30-D9:N2-D9	C21968	C21968	C15H26O14	M+H	37.9	0	-0.74129	90.388	2-O-[alpha-D-Glucopyranosyl-(1->6)-alpha-D-glucopyranosyl]-D-glycerate;	null	null	null	431.139	NA	3.44853	1	NULL
11.36_297.0436m/z	3.48_199.0604m/z	0.716002	0.0174005	1.24078	NC30-D9:N2-D9	C20582	C20582	C9H12O6	M+H-H2O	41.8	15.7	1.23553	94.9406	cis-(Homo)3-aconitate;	null	null	null	199.06	NA	3.4771	1	map00680 Methane metabolism; map01120 Microbial metabolism in diverse environments; map01210 2-Oxocarboxylic acid metabolism
11.36_313.0377m/z	3.53_180.0871m/z	1.92293	0.0398249	1.70801	NC30-D9:N2-D9	C12212	C12212	C6H13NO5	M+H	40.5	8.05	2.52067	97.5094	Kanosamine; D-Kanosamine; 3-Amino-3-deoxy-D-glucose;	null	null	null	180.087	NA	3.53425	1	map00999 Biosynthesis of secondary metabolites - unclassified; map01051 Biosynthesis of ansamycins; map01130 Biosynthesis of antibiotics
11.36_315.0183m/z	3.53_180.0871m/z	1.92293	0.0398249	1.70801	NC30-D9:N2-D9	C21051	C21051	C6H13NO5	M+H	40.5	8.05	2.52067	97.5094	L-Idosamine; 2-Amino-2-deoxy-L-idopyranose;	null	null	null	180.087	NA	3.53425	1	NULL
11.36_632.2076n	3.53_180.0871m/z	1.92293	0.0398249	1.70801	NC30-D9:N2-D9	C21060	C21060	C6H13NO5	M+H	40.5	8.05	2.52067	97.5094	D-Talosamine; 2-Amino-2-deoxy-D-talopyranose;	null	null	null	180.087	NA	3.53425	1	NULL
11.36_846.2329n	3.53_180.0871m/z	1.92293	0.0398249	1.70801	NC30-D9:N2-D9	C03570	C03570	C6H13NO5	M+H	40.5	8.05	2.52067	97.5094	D-Mannosamine; 2-Amino-2-deoxy-D-mannose;	null	null	null	180.087	NA	3.53425	1	NULL
11.38_359.0590m/z	3.53_180.0871m/z	1.92293	0.0398249	1.70801	NC30-D9:N2-D9	C00329	C00329	C6H13NO5	M+H	40.5	8.05	2.52067	97.5094	D-Glucosamine; Chitosamine; 2-Amino-2-deoxy-D-glucose;	Organic oxygen compounds	Organooxygen compounds	Carbohydrates and carbohydrate conjugates	180.087	NA	3.53425	1	map00520 Amino sugar and nucleotide sugar metabolism; map01100 Metabolic pathways; map02060 Phosphotransferase system (PTS)
11.38_429.0848m/z	3.53_180.0871m/z	1.92293	0.0398249	1.70801	NC30-D9:N2-D9	C02262	C02262	C6H13NO5	M+H	40.5	8.05	2.52067	97.5094	D-Galactosamine; D-Chondrosamine; 2-Amino-2-deoxy-D-galactose;	null	null	null	180.087	NA	3.53425	1	map00052 Galactose metabolism; map02060 Phosphotransferase system (PTS)
11.38_628.4791m/z	3.53_180.0871m/z	1.92293	0.0398249	1.70801	NC30-D9:N2-D9	C08349	C08349	C6H13NO5	M+H	40.5	8.05	2.52067	97.5094	beta-D-Glucosamine;	Organooxygen compounds	Carbohydrates and carbohydrate conjugates	Aminosaccharides	180.087	NA	3.53425	1	NULL
11.39_421.3623m/z	3.53_180.0871m/z	1.92293	0.0398249	1.70801	NC30-D9:N2-D9	C21038	C21038	C6H13NO5	M+H	40.5	8.05	2.52067	97.5094	D-Allosamine; 2-Amino-2-deoxy-D-allopyranose;	null	null	null	180.087	NA	3.53425	1	NULL
11.41_466.3812m/z	3.53_180.0871m/z	1.92293	0.0398249	1.70801	NC30-D9:N2-D9	C21048	C21048	C6H13NO5	M+H	40.5	8.05	2.52067	97.5094	D-Gulosamine; 2-Amino-2-deoxy-D-gulopyranose;	null	null	null	180.087	NA	3.53425	1	NULL
11.42_633.4480m/z	3.53_180.0871m/z	1.92293	0.0398249	1.70801	NC30-D9:N2-D9	C21035	C21035	C6H13NO5	M+H	40.5	8.05	2.52067	97.5094	L-Altrosamine; 2-Amino-2-deoxy-L-altropyranose;	null	null	null	180.087	NA	3.53425	1	NULL
11.44_455.4076m/z	3.58_361.2415m/z	0.169752	0.0305631	2.16267	NC30-D9:N2-D9	C09097	C09097	C23H28N4	M+H	36.1	0	7.79148	88.9978	Calycanthidine;	null	null	null	361.241	NA	3.5771	1	NULL
11.46_629.5429m/z	3.59_122.0960m/z	0.697275	0.0168968	1.00849	NC30-D9:N2-D9	C00783	C00783	C8H13NO	M+H-H2O	38.3	0	-2.84061	94.791	Tropinone; 3-Tropanone;	null	null	null	122.096	NA	3.5914	1	map00960 Tropane, piperidine and pyridine alkaloid biosynthesis; map01064 Biosynthesis of alkaloids derived from ornithine, lysine and nicotinic acid; map01100 Metabolic pathways; map01110 Biosynthesis of secondary metabolites
11.52_555.3869m/z	3.59_122.0960m/z	0.697275	0.0168968	1.00849	NC30-D9:N2-D9	C10400	C10400	C8H13NO	M+H-H2O	38.3	0	-2.84061	94.791	Supinidine;	null	null	null	122.096	NA	3.5914	1	NULL
11.67_744.6288m/z	3.59_122.0960m/z	0.697275	0.0168968	1.00849	NC30-D9:N2-D9	C16697	C16697	C8H13NO	M+H-H2O	38.3	0	-2.84061	94.791	1-Indolizidinone; 1-Ketooctahydroindolizine;	null	null	null	122.096	NA	3.5914	1	map00960 Tropane, piperidine and pyridine alkaloid biosynthesis; map01064 Biosynthesis of alkaloids derived from ornithine, lysine and nicotinic acid; map01110 Biosynthesis of secondary metabolites
11.69_397.3653m/z	3.69_298.1124m/z	2.18378	0.0168968	1.86719	NC30-D9:N2-D9	C05342	C05342	C11H15N5O5	M+H	41.3	21.4	-7.31813	93.3662	Psicofuranine; Angustmycin C;	null	null	null	298.112	NA	3.6914	1	NULL
11.74_920.2519n	3.71_515.1406m/z	5.2213	0.0192999	3.64907	NC30-D9:N2-D9	C15976	C15976	C16H27N4O8P2S+	M+NH4	35.7	0.5	8.68941	87.7168	2-Methyl-1-hydroxypropyl-ThPP; 2-Methyl-1-hydroxypropyl-TPP;	Organoheterocyclic compounds	Diazines	Pyrimidines and pyrimidine derivatives	515.141	NA	3.70568	1	map00280 Valine, leucine and isoleucine degradation
11.75_315.0178m/z	3.78_193.1310m/z	0.356414	0.0168968	2.18722	NC30-D9:N2-D9	C00327	C00327	C6H13N3O3	M+NH4	37.6	0	8.57107	97.6762	L-Citrulline; 2-Amino-5-ureidovaleric acid; Citrulline;	Organic acids and derivatives	Carboxylic acids and derivatives	Amino acids, peptides, and analogues	193.131	NA	3.78068	1	map00220 Arginine biosynthesis; map01100 Metabolic pathways; map01110 Biosynthesis of secondary metabolites; map01130 Biosynthesis of antibiotics; map01230 Biosynthesis of amino acids
11.75_643.2815m/z	3.81_219.0788m/z	0.648227	0.0208907	1.54954	NC30-D9:N2-D9	C14763	C14763	C14H12O	M+Na	38.4	0	3.8496	96.5528	trans-4-Hydroxystilbene; (E)-4-Stilbenol;	null	null	null	219.079	NA	3.81213	1	NULL
11.84_348.0717n	3.81_219.0788m/z	0.648227	0.0208907	1.54954	NC30-D9:N2-D9	C16014	C16014	C14H12O	M+Na	38.4	0	3.8496	96.5528	cis-Stilbene oxide;	Phenylpropanoids and polyketides	Stilbenes	null	219.079	NA	3.81213	1	NULL
11.88_962.2440n	3.81_252.1561m/z	0.724467	0.0168968	1.1668	NC30-D9:N2-D9	C12025	C12025	C9H18N2O5	M+NH4	34.2	0.15	2.89702	74.3122	2,6-Diamino-7-hydroxy-azelaic acid;	null	null	null	252.156	NA	3.81213	1	NULL
12.05_804.3459m/z	3.84_564.1312m/z	0.211215	0.0336996	2.78904	NC30-D9:N2-D9	C12444	C12444	C17H28N2O14P2	M+NH4	37.2	0	-7.7092	94.8092	dTDP-D-mycarose;	null	null	null	564.131	NA	3.8407	1	NULL
12.19_525.3801m/z	3.84_564.1312m/z	0.211215	0.0336996	2.78904	NC30-D9:N2-D9	C11921	C11921	C17H28N2O14P2	M+NH4	37.2	0	-7.7092	94.8092	dTDP-L-oleandrose;	null	null	null	564.131	NA	3.8407	1	map00522 Biosynthesis of 12-, 14- and 16-membered macrolides; map00523 Polyketide sugar unit biosynthesis; map01130 Biosynthesis of antibiotics
12.33_519.4543m/z	3.84_564.1312m/z	0.211215	0.0336996	2.78904	NC30-D9:N2-D9	C11916	C11916	C17H28N2O14P2	M+NH4	37.2	0	-7.7092	94.8092	dTDP-L-mycarose; dTDP-beta-L-mycarose; dTDP-2,6-dideoxy-3-C-methyl-beta-L-ribo-hexose;	null	null	null	564.131	NA	3.8407	1	map00522 Biosynthesis of 12-, 14- and 16-membered macrolides; map00523 Polyketide sugar unit biosynthesis; map01130 Biosynthesis of antibiotics
12.35_615.3419m/z	3.93_312.1281m/z	1.8723	0.0174005	1.0937	NC30-D9:N2-D9	C19843	C19843	C10H19N5O5	M+Na	34.6	4.62	0.864	69.6583	L-Asp(4-L-Arg);	null	null	null	312.128	NA	3.92642	1	NULL
12.39_291.1115m/z	4.00_435.1742m/z	6.08029	0.0168968	3.7767	NC30-D9:N2-D9	C11191	C11191	C23H25F3N2OS	M+H	37.6	0	6.84209	95.6775	cis-(Z)-Flupenthixol;	null	null	null	435.174	NA	3.99785	1	NULL
12.63_938.2594m/z	4.03_428.1214m/z	6.96799	0.0168968	3.58412	NC30-D9:N2-D9	C10937	C10937	C16H18N4O7S	M+NH4	36	0	-5.04348	86.0298	Bensulfuron-methyl; Bensulfuron methyl; Methyl bensulfuron;	null	null	null	428.121	NA	4.02642	1	NULL
12.65_906.2624m/z	4.06_178.1325m/z	0.553628	0.017655	1.30061	NC30-D9:N2-D9	C02636	C02636	C7H14NO3+	M+NH4	36.5	0	8.45222	91.6392	3-Dehydrocarnitine; 3-Carboxy-N,N,N-trimethyl-2-oxo-1-propanaminium;	null	null	null	178.133	NA	4.055	1	NULL
12.69_291.1119m/z	4.19_138.0908m/z	3.71209	0.0448439	2.50365	NC30-D9:N2-D9	C05627	C05627	C8H8O	M+NH4	42.8	23.7	-4.25911	95.1404	4-Hydroxystyrene; 4-Vinylphenol;	Benzenoids	Benzene and substituted derivatives	Styrenes	138.091	NA	4.19	1	map00940 Phenylpropanoid biosynthesis
12.71_322.9487m/z	4.29_134.0595m/z	2.59304	0.0207622	1.92961	NC30-D9:N2-D9	C21623	C21623	C8H9NO2	M+H-H2O	38.7	0	-3.65736	97.6706	1-aci-Nitro-2-phenylethane;	null	null	null	134.059	NA	4.29002	1	NULL
12.73_287.0393m/z	4.29_134.0595m/z	2.59304	0.0207622	1.92961	NC30-D9:N2-D9	C17756	C17756	C8H9NO2	M+H-H2O	38.7	0	-3.65736	97.6706	2-Descarboxy-cyclo-dopa; Indoline-5,6-diol; 5,6-Indolinediol;	Organoheterocyclic compounds	Indoles and derivatives	Indolines	134.059	NA	4.29002	1	map00965 Betalain biosynthesis
12.86_272.9461m/z	4.29_134.0595m/z	2.59304	0.0207622	1.92961	NC30-D9:N2-D9	C18623	C18623	C8H9NO2	M+H-H2O	38.7	0	-3.65736	97.6706	L-Phenylglycine; Phenylglycine;	null	null	null	134.059	NA	4.29002	1	NULL
12.88_406.1060m/z	4.29_134.0595m/z	2.59304	0.0207622	1.92961	NC30-D9:N2-D9	C04350	C04350	C8H9NO2	M+H-H2O	38.7	0	-3.65736	97.6706	(E)-4-Hydroxyphenylacetaldehyde oxime; (E)-[4-Hydroxyphenylacetaldehyde oxime];	null	null	null	134.059	NA	4.29002	1	map00460 Cyanoamino acid metabolism; map00966 Glucosinolate biosynthesis; map01110 Biosynthesis of secondary metabolites; map01210 2-Oxocarboxylic acid metabolism
12.90_246.9418m/z	4.29_134.0595m/z	2.59304	0.0207622	1.92961	NC30-D9:N2-D9	C06804	C06804	C8H9NO2	M+H-H2O	38.7	0	-3.65736	97.6706	Acetaminophen; Paracetamol;	Benzenoids	Phenols	1-hydroxy-2-unsubstituted benzenoids	134.059	NA	4.29002	1	map04976 Bile secretion
12.90_255.9423m/z	4.29_134.0595m/z	2.59304	0.0207622	1.92961	NC30-D9:N2-D9	C17755	C17755	C8H9NO2	M+H-H2O	38.7	0	-3.65736	97.6706	Dopamine quinone;	Organic oxygen compounds	Organooxygen compounds	Carbonyl compounds	134.059	NA	4.29002	1	map00965 Betalain biosynthesis
12.98_439.1472m/z	4.29_134.0595m/z	2.59304	0.0207622	1.92961	NC30-D9:N2-D9	C20634	C20634	C8H9NO2	M+H-H2O	38.7	0	-3.65736	97.6706	O-Methyl anthranilate;	Benzenoids	Benzene and substituted derivatives	Benzoic acids and derivatives	134.059	NA	4.29002	1	NULL
12.98_465.1662m/z	4.29_134.0595m/z	2.59304	0.0207622	1.92961	NC30-D9:N2-D9	C07301	C07301	C8H9NO2	M+H-H2O	38.7	0	-3.65736	97.6706	(R)-Mandelamide;	null	null	null	134.059	NA	4.29002	1	map00627 Aminobenzoate degradation; map01120 Microbial metabolism in diverse environments
12.98_483.1774m/z	4.29_134.0595m/z	2.59304	0.0207622	1.92961	NC30-D9:N2-D9	C02709	C02709	C8H9NO2	M+H-H2O	38.7	0	-3.65736	97.6706	N-(Acetyloxy)benzenamine;	null	null	null	134.059	NA	4.29002	1	NULL
12.98_586.5394m/z	4.29_134.0595m/z	2.59304	0.0207622	1.92961	NC30-D9:N2-D9	C04353	C04353	C8H9NO2	M+H-H2O	38.7	0	-3.65736	97.6706	(Z)-4-Hydroxyphenylacetaldehyde oxime; (Z)-[4-Hydroxyphenylacetaldehyde oxime];	null	null	null	134.059	NA	4.29002	1	NULL
13.00_553.4583m/z	4.29_134.0595m/z	2.59304	0.0207622	1.92961	NC30-D9:N2-D9	C03005	C03005	C8H9NO2	M+H-H2O	38.7	0	-3.65736	97.6706	N-Methylanthranilate; N-Methylanthranilic acid; 2-(Methylamino)benzoic acid;	Benzenoids	Benzene and substituted derivatives	Benzoic acids and derivatives	134.059	NA	4.29002	1	map01058 Acridone alkaloid biosynthesis; map01063 Biosynthesis of alkaloids derived from shikimate pathway; map01110 Biosynthesis of secondary metabolites
2.17_267.0564m/z	4.29_134.0595m/z	2.59304	0.0207622	1.92961	NC30-D9:N2-D9	C03522	C03522	C8H9NO2	M+H-H2O	38.7	0	-3.65736	97.6706	N-Methyl-4-aminobenzoate;	null	null	null	134.059	NA	4.29002	1	NULL
2.17_344.9992m/z	4.29_134.0595m/z	2.59304	0.0207622	1.92961	NC30-D9:N2-D9	C16571	C16571	C8H9NO2	M+H-H2O	38.7	0	-3.65736	97.6706	2-Amino-3-methylbenzoate;	Benzenoids	Benzene and substituted derivatives	Benzoic acids and derivatives	134.059	NA	4.29002	1	map00982 Drug metabolism - cytochrome P450
2.18_113.0344m/z	4.29_318.0928m/z	2.38987	0.0179167	1.7806	NC30-D9:N2-D9	C08481	C08481	C14H17NO6	M+Na	41	23.2	-6.92812	89.8935	Indican; Indican, plant;	null	null	null	318.093	NA	4.29002	1	NULL
2.21_411.0212m/z	4.29_435.1817m/z	2.77882	0.0201937	2.21211	NC30-D9:N2-D9	C07349	C07349	C27H24N4O3	M+H-H2O	36.2	0	0.431236	81.3902	3'-Demethylstaurosporine; 3'-Demethoxy-3'-hydroxystaurosporine;	null	null	null	435.182	NA	4.29002	1	map00404 Staurosporine biosynthesis; map01130 Biosynthesis of antibiotics
2.27_364.0630m/z	4.29_460.2339m/z	2.90658	0.0249401	1.68993	NC30-D9:N2-D9	C15758	C15758	C25H33NO7	M+H	25.8	0	1.97729	31.3913	Lankacidin C;	null	null	null	460.234	NA	4.29002	1	NULL
3.26_385.1266m/z	4.33_132.0438m/z	1.88146	0.0298626	1.59247	NC30-D9:N2-D9	C02775	C02775	C8H7NO2	M+H-H2O	30.8	0	-3.81119	58.4298	2,3-Dihydroxyindole; Dihydroxyindole;	null	null	null	132.044	NA	4.33287	1	map00380 Tryptophan metabolism
3.31_238.1427m/z	4.33_132.0438m/z	1.88146	0.0298626	1.59247	NC30-D9:N2-D9	C03574	C03574	C8H7NO2	M+H-H2O	30.8	0	-3.81119	58.4298	2-Formylaminobenzaldehyde;	null	null	null	132.044	NA	4.33287	1	map00380 Tryptophan metabolism
3.31_304.0939m/z	4.33_132.0438m/z	1.88146	0.0298626	1.59247	NC30-D9:N2-D9	C11130	C11130	C8H7NO2	M+H-H2O	30.8	0	-3.81119	58.4298	3-Hydroxyindolin-2-one; 1,3-Dihydro-3-hydroxy-2H-indol-2-one; Dioxindole;	null	null	null	132.044	NA	4.33287	1	map00402 Benzoxazinoid biosynthesis; map01110 Biosynthesis of secondary metabolites
3.34_210.1153n	4.33_132.0438m/z	1.88146	0.0298626	1.59247	NC30-D9:N2-D9	C09957	C09957	C8H7NO2	M+H-H2O	30.8	0	-3.81119	58.4298	Gentianadine;	null	null	null	132.044	NA	4.33287	1	NULL
3.36_267.9864m/z	4.33_132.0438m/z	1.88146	0.0298626	1.59247	NC30-D9:N2-D9	C00650	C00650	C8H7NO2	M+H-H2O	30.8	0	-3.81119	58.4298	4-Hydroxymandelonitrile;	null	null	null	132.044	NA	4.33287	1	NULL
3.36_367.0030n	4.33_132.0438m/z	1.88146	0.0298626	1.59247	NC30-D9:N2-D9	C05578	C05578	C8H7NO2	M+H-H2O	30.8	0	-3.81119	58.4298	5,6-Dihydroxyindole; DHI;	Organoheterocyclic compounds	Indoles and derivatives	Hydroxyindoles	132.044	NA	4.33287	1	map00350 Tyrosine metabolism; map01100 Metabolic pathways
3.36_367.0144m/z	4.33_132.0438m/z	1.88146	0.0298626	1.59247	NC30-D9:N2-D9	C03742	C03742	C8H7NO2	M+H-H2O	30.8	0	-3.81119	58.4298	(S)-4-Hydroxymandelonitrile;	Benzenoids	Phenols	1-hydroxy-2-unsubstituted benzenoids	132.044	NA	4.33287	1	map00460 Cyanoamino acid metabolism; map01110 Biosynthesis of secondary metabolites
3.36_414.0081m/z	4.33_345.1409m/z	3.17526	0.0168968	3.07385	NC30-D9:N2-D9	C17362	C17362	C13H22N4O8	M+H-H2O	43.6	30.9	1.16977	88.5708	Clavamycin B;	null	null	null	345.141	NA	4.33287	1	NULL
3.36_432.0418n	4.33_345.1409m/z	3.17526	0.0168968	3.07385	NC30-D9:N2-D9	C17363	C17363	C13H22N4O8	M+H-H2O	43.6	30.9	1.16977	88.5708	Clavamycin C;	null	null	null	345.141	NA	4.33287	1	NULL
3.36_445.1978m/z	4.36_164.0922m/z	2.13344	0.0168968	1.56659	NC30-D9:N2-D9	C10143	C10143	C6H13NO4	M+H	38.6	0	2.89418	96.4367	DMDP; 2,5-Dihydroxymethyl-3,4-dihydroxypyrrolidine;	null	null	null	164.092	NA	4.36145	1	NULL
3.37_119.0352m/z	4.36_164.0922m/z	2.13344	0.0168968	1.56659	NC30-D9:N2-D9	C10141	C10141	C6H13NO4	M+H	38.6	0	2.89418	96.4367	Deoxymannojirimycin; DMJ;	null	null	null	164.092	NA	4.36145	1	NULL
3.37_127.0380n	4.36_164.0922m/z	2.13344	0.0168968	1.56659	NC30-D9:N2-D9	C16843	C16843	C6H13NO4	M+H	38.6	0	2.89418	96.4367	Deoxynojirimycin; Moranolin;	null	null	null	164.092	NA	4.36145	1	map01130 Biosynthesis of antibiotics
3.37_137.0457m/z	4.36_164.0922m/z	2.13344	0.0168968	1.56659	NC30-D9:N2-D9	C20311	C20311	C6H13NO4	M+H	38.6	0	2.89418	96.4367	N,N-Dihydroxy-L-isoleucine;	null	null	null	164.092	NA	4.36145	1	map00460 Cyanoamino acid metabolism; map01110 Biosynthesis of secondary metabolites
3.37_198.0069n	4.36_164.0922m/z	2.13344	0.0168968	1.56659	NC30-D9:N2-D9	C15479	C15479	C6H13NO4	M+H	38.6	0	2.89418	96.4367	D-Quinovosamine; 2-Amino-2,6-dideoxy-D-glucose;	null	null	null	164.092	NA	4.36145	1	NULL
3.37_268.0803n	4.36_164.0922m/z	2.13344	0.0168968	1.56659	NC30-D9:N2-D9	C17580	C17580	C6H13NO4	M+H	38.6	0	2.89418	96.4367	2-Deoxy-scyllo-inosamine;	null	null	null	164.092	NA	4.36145	1	map00524 Neomycin, kanamycin and gentamicin biosynthesis; map01130 Biosynthesis of antibiotics
3.37_330.0486n	4.36_164.0922m/z	2.13344	0.0168968	1.56659	NC30-D9:N2-D9	C15478	C15478	C6H13NO4	M+H	38.6	0	2.89418	96.4367	D-Fucosamine; 2-Amino-2,6-dideoxy-D-galactose;	null	null	null	164.092	NA	4.36145	1	NULL
3.37_384.0208m/z	4.36_296.1341m/z	2.66505	0.0168968	1.85207	NC30-D9:N2-D9	C20577	C20577	C11H18O8	M+NH4	48.4	45.1	0.214063	97.0238	6-Tuliposide A; 6-O-(4-Hydroxy-2-methylenebutanoyl)-D-glucose;	null	null	null	296.134	NA	4.36145	1	NULL
3.37_399.0220n	4.36_413.1405m/z	2.08209	0.0185497	2.21837	NC30-D9:N2-D9	C01433	C01433	C17H26O10	M+Na	38.2	0	-3.29935	94.672	Loganin;	null	null	null	413.141	NA	4.36145	1	map00902 Monoterpenoid biosynthesis; map01062 Biosynthesis of terpenoids and steroids; map01100 Metabolic pathways; map01110 Biosynthesis of secondary metabolites
3.37_399.1116n	4.40_383.1308n	2.81406	0.0168968	2.28828	NC30-D9:N2-D9	C11029	C11029	C19H20F3NO4	M+NH4, M+Na	34.1	0	-9.42152	80.916	Fluazifop butyl;	null	null	null	401.165	383.131	4.4043	1	NULL
3.37_410.0348m/z	4.40_419.1806m/z	4.85592	0.0168968	3.70785	NC30-D9:N2-D9	C07267	C07267	C21H26N2O7	M+H	39	0	-1.65141	96.8479	Nimodipine;	Organoheterocyclic compounds	Pyridines and derivatives	Hydropyridines	419.181	NA	4.4043	1	NULL
3.37_536.1613n	4.55_289.1216m/z	0.663176	0.0185066	1.33533	NC30-D9:N2-D9	C19559	C19559	C20H18O3	M+H-H2O	39	0	-2.16981	97.3861	(1aalpha,2beta,3alpha,11calpha)-1a,2,3,11c-Tetrahydro-6,11-dimethylbenzo[6,7]phenanthro[3,4-b]oxirene-2,3-diol;	Benzenoids	Phenanthrenes and derivatives	Phenanthrols	289.122	NA	4.5536	1	map00980 Metabolism of xenobiotics by cytochrome P450; map05204 Chemical carcinogenesis
3.38_187.1536m/z	4.58_431.1877m/z	5.57796	0.0168968	2.72576	NC30-D9:N2-D9	C10491	C10491	C27H28O6	M+H-H2O	36.1	0	5.28587	86.8287	Lonchocarpenin;	null	null	null	431.188	NA	4.58218	1	NULL
3.38_427.0270m/z	4.65_300.1057m/z	5.22999	0.0168968	3.48321	NC30-D9:N2-D9	C16352	C16352	C11H15N4O6+	M+H	38.2	0	-2.57391	94.2278	7-Methylxanthosine;	null	null	null	300.106	NA	4.65362	1	map00232 Caffeine metabolism; map01100 Metabolic pathways; map01110 Biosynthesis of secondary metabolites
3.38_513.0883m/z	4.85_109.0525n	3.60308	0.0168968	3.18842	NC30-D9:N2-D9	C02720	C02720	C6H7NO	M+H-H2O, M+H	38.7	0	-2.21173	96.3027	Hydroxylaminobenzene; (Hydroxyamino)benzene; N-Phenylhydroxylamine;	null	null	null	92.0492	109.053	4.84577	1	map00627 Aminobenzoate degradation; map01120 Microbial metabolism in diverse environments
3.45_180.6241m/z	4.85_109.0525n	3.60308	0.0168968	3.18842	NC30-D9:N2-D9	C05058	C05058	C6H7NO	M+H-H2O, M+H	38.7	0	-2.21173	96.3027	m-Aminophenol; 3-Aminophenol; 3-Hydroxyaniline;	null	null	null	92.0492	109.053	4.84577	1	NULL
3.45_431.1392m/z	4.85_109.0525n	3.60308	0.0168968	3.18842	NC30-D9:N2-D9	C02372	C02372	C6H7NO	M+H-H2O, M+H	38.7	0	-2.21173	96.3027	4-Hydroxyaniline; 4-Aminophenol; p-Aminophenol; 4-Aminobenzenol;	Benzenoids	Benzene and substituted derivatives	Aniline and substituted anilines	92.0492	109.053	4.84577	1	map00627 Aminobenzoate degradation; map01120 Microbial metabolism in diverse environments
3.48_199.0604m/z	4.85_109.0525n	3.60308	0.0168968	3.18842	NC30-D9:N2-D9	C01987	C01987	C6H7NO	M+H-H2O, M+H	38.7	0	-2.21173	96.3027	2-Aminophenol; 2-Hydroxyaniline; 2-Aminobenzenol; o-Aminophenol;	null	null	null	92.0492	109.053	4.84577	1	map00380 Tryptophan metabolism; map00627 Aminobenzoate degradation; map01120 Microbial metabolism in diverse environments
3.49_254.1591m/z	4.85_124.0755m/z	2.87509	0.0168968	2.85019	NC30-D9:N2-D9	C19191	C19191	C7H9NO	M+H	43.8	21.9	-1.80596	99.4914	ortho-Anisidine; o-Anisidine;	null	null	null	124.075	NA	4.84577	1	NULL
3.53_180.0871m/z	4.85_124.0755m/z	2.87509	0.0168968	2.85019	NC30-D9:N2-D9	C19326	C19326	C7H9NO	M+H	43.8	21.9	-1.80596	99.4914	para-Anisidine; 1-Amino-4-methoxybenzene;	Benzenoids	Benzene and substituted derivatives	Anilines	124.075	NA	4.84577	1	NULL
3.56_440.0913m/z	4.85_137.0477n	2.97836	0.0168968	2.92978	NC30-D9:N2-D9	C00568	C00568	C7H7NO2	M+H-H2O, M+H	55.6	91	0.448722	87.2557	4-Aminobenzoate; ABEE; 4-Aminobenzoic acid; p-Aminobenzoate;	Benzenoids	Benzene and substituted derivatives	Benzoic acids and derivatives	120.044	137.048	4.84577	1	map00627 Aminobenzoate degradation; map00790 Folate biosynthesis; map01061 Biosynthesis of phenylpropanoids; map01100 Metabolic pathways; map01120 Microbial metabolism in diverse environments
3.58_361.2415m/z	4.85_137.0477n	2.97836	0.0168968	2.92978	NC30-D9:N2-D9	C00108	C00108	C7H7NO2	M+H-H2O, M+H	55.6	91	0.448722	87.2557	Anthranilate; Anthranilic acid; o-Aminobenzoic acid; Vitamin L1; 2-Aminobenzoate;	Benzenoids	Benzene and substituted derivatives	Benzoic acids and derivatives	120.044	137.048	4.84577	1	map00380 Tryptophan metabolism; map00400 Phenylalanine, tyrosine and tryptophan biosynthesis; map00405 Phenazine biosynthesis; map00621 Dioxin degradation; map00627 Aminobenzoate degradation; map00999 Biosynthesis of secondary metabolites - unclassified; map01058 Acridone alkaloid biosynthesis; map01060 Biosynthesis of plant secondary metabolites; map01061 Biosynthesis of phenylpropanoids; map010…
3.59_122.0960m/z	4.85_152.0702m/z	4.3957	0.0168968	3.45094	NC30-D9:N2-D9	C20634	C20634	C8H9NO2	M+H	57.9	94.8	-2.38776	97.3869	O-Methyl anthranilate;	Benzenoids	Benzene and substituted derivatives	Benzoic acids and derivatives	152.07	NA	4.84577	1	NULL
3.63_533.1823n	4.85_97.0646m/z	3.22278	0.0242182	3.05145	NC30-D9:N2-D9	C01147	C01147	C6H10O2	M+H-H2O	39	0	-2.02535	97.5743	2-Hydroxycyclohexan-1-one; 2-Hydroxycyclohexanone; Adipoin;	null	null	null	97.0646	NA	4.84577	1	map00930 Caprolactam degradation; map01120 Microbial metabolism in diverse environments
3.69_298.1124m/z	4.85_97.0646m/z	3.22278	0.0242182	3.05145	NC30-D9:N2-D9	C01880	C01880	C6H10O2	M+H-H2O	39	0	-2.02535	97.5743	epsilon-Caprolactone; 6-Hexanolide; 1-Oxa-2-oxocycloheptane; 2-Oxepanone; Hexano-6-lactone;	Organoheterocyclic compounds	Lactones	null	97.0646	NA	4.84577	1	map00930 Caprolactam degradation; map01120 Microbial metabolism in diverse environments; map01220 Degradation of aromatic compounds
3.71_257.5681n	4.85_97.0646m/z	3.22278	0.0242182	3.05145	NC30-D9:N2-D9	C03228	C03228	C6H10O2	M+H-H2O	39	0	-2.02535	97.5743	3-Hydroxycyclohexanone;	null	null	null	97.0646	NA	4.84577	1	NULL
3.71_515.1406m/z	4.87_560.2952m/z	2.83302	0.0187555	2.24626	NC30-D9:N2-D9	C15683	C15683	C29H47NO7	M+K	31.3	0	-6.23766	63.7128	Mycinamicin VII;	null	null	null	560.295	NA	4.87435	1	map01130 Biosynthesis of antibiotics
3.78_193.1310m/z	4.96_250.1103m/z	2.68811	0.0175824	2.63046	NC30-D9:N2-D9	C18700	C18700	C9H17N5S	M+Na	38.2	0	2.80087	94.2023	Ametryn;	null	null	null	250.11	NA	4.96007	1	NULL
3.81_219.0788m/z	4.96_412.1636m/z	3.06125	0.0168968	2.72388	NC30-D9:N2-D9	C13906	C13906	C20H24FN3O4	M+Na	37.5	0	-1.93769	89.9499	Balofloxacin;	null	null	null	412.164	NA	4.96007	1	NULL
3.81_252.1561m/z	5.03_462.2855m/z	0.74743	0.0344943	1.2145	NC30-D9:N2-D9	C16923	C16923	C26H36O6	M+NH4	36.1	0	1.17378	82.0772	Bufotalin; 3beta,14,16beta-Trihydroxy-5beta-bufa-20,22-dienolide 16-acetate;	null	null	null	462.286	NA	5.0315	1	NULL
3.83_263.6507m/z	5.06_283.0715m/z	0.678708	0.0250003	1.09215	NC30-D9:N2-D9	C14265	C14265	C15H10N2O4	M+H	33.2	0	0.748603	66.9888	N-(p-Nitrobenzyl)phthalimide; 2-(4-Nitrobenzyl)isoindole-1,3-dione;	null	null	null	283.072	NA	5.06007	1	NULL
3.84_564.1312m/z	5.12_154.0987n	0.685376	0.0480623	1.15128	NC30-D9:N2-D9	C09772	C09772	C9H14O2	M+H, M+NH4, M+H-H2O	38.8	0	-4.56582	99.1892	Boschnialactone;	null	null	null	155.106	154.099	5.11722	1	NULL
3.93_312.1281m/z	5.12_272.0550m/z	0.69009	0.0240998	1.10633	NC30-D9:N2-D9	C08478	C08478	C14H11NO6	M+H-H2O	33.8	0	-1.05718	70.3077	Dianthramine; 2,2'-Iminobis(4-hydroxybenzoic acid);	null	null	null	272.055	NA	5.11722	1	NULL
3.94_301.6741m/z	5.31_299.1442m/z	2.33221	0.0377596	2.26485	NC30-D9:N2-D9	C02494	C02494	C11H15N5O4	M+NH4	37.4	0	-7.26168	95.2659	1-Methyladenosine;	Nucleosides, nucleotides, and analogues	Purine nucleosides	null	299.144	NA	5.30937	1	NULL
3.98_384.1125m/z	5.31_299.1442m/z	2.33221	0.0377596	2.26485	NC30-D9:N2-D9	C05031	C05031	C11H15N5O4	M+NH4	37.4	0	-7.26168	95.2659	O6-Methyl-2'-deoxyguanosine;	null	null	null	299.144	NA	5.30937	1	NULL
4.00_295.6123m/z	5.47_577.2014m/z	6.77321	0.0208246	3.71812	NC30-D9:N2-D9	C17686	C17686	C30H34O10	M+Na	36.4	0	-5.46915	88.293	Lappaol C;	null	null	null	577.201	NA	5.46653	1	NULL
4.00_435.1742m/z	5.60_146.0595m/z	1.91603	0.0339304	1.58096	NC30-D9:N2-D9	C19567	C19567	C9H9NO2	M+H-H2O	32.8	0	-3.34096	68.031	4-Oxo-1-(3-pyridyl)-1-butanone; gamma-Oxo-3-pyridinebutanal; 4-Oxo-4-(pyridin-3-yl)butanal; 3-Succinoylsemialdehyde-pyridine;	Organic oxygen compounds	Organooxygen compounds	Carbonyl compounds	146.059	NA	5.60153	1	map00760 Nicotinate and nicotinamide metabolism; map00980 Metabolism of xenobiotics by cytochrome P450; map01120 Microbial metabolism in diverse environments; map05204 Chemical carcinogenesis
4.03_428.1214m/z	5.60_146.0595m/z	1.91603	0.0339304	1.58096	NC30-D9:N2-D9	C05834	C05834	C9H9NO2	M+H-H2O	32.8	0	-3.34096	68.031	3-Methyldioxyindole; 3-Hydroxy-3-methyloxindole;	Organoheterocyclic compounds	Indoles and derivatives	Indolines	146.059	NA	5.60153	1	map00380 Tryptophan metabolism
4.06_178.1325m/z	5.62_285.1352n	0.694538	0.0168968	1.18194	NC30-D9:N2-D9	C12167	C12167	C17H19NO3	M+H, M+NH4	37.7	0	-4.60534	94.0251	Cherylline;	null	null	null	303.173	285.135	5.61583	1	NULL
4.16_155.1536m/z	5.62_285.1352n	0.694538	0.0168968	1.18194	NC30-D9:N2-D9	C09422	C09422	C17H19NO3	M+H, M+NH4	37.7	0	-4.60534	94.0251	Erysonine;	null	null	null	303.173	285.135	5.61583	1	NULL
4.19_138.0908m/z	5.62_285.1352n	0.694538	0.0168968	1.18194	NC30-D9:N2-D9	C07042	C07042	C17H19NO3	M+H, M+NH4	37.7	0	-4.60534	94.0251	Hydromorphone;	Alkaloids and derivatives	Morphinans	null	303.173	285.135	5.61583	1	NULL
4.23_258.6600m/z	5.62_285.1352n	0.694538	0.0168968	1.18194	NC30-D9:N2-D9	C08534	C08534	C17H19NO3	M+H, M+NH4	37.7	0	-4.60534	94.0251	Narwedine; (-)-Narwedine; Galanthaminone;	null	null	null	303.173	285.135	5.61583	1	NULL
4.29_134.0595m/z	5.62_285.1352n	0.694538	0.0168968	1.18194	NC30-D9:N2-D9	C10844	C10844	C17H19NO3	M+H, M+NH4	37.7	0	-4.60534	94.0251	Apohyoscine;	null	null	null	303.173	285.135	5.61583	1	NULL
4.29_318.0928m/z	5.62_285.1352n	0.694538	0.0168968	1.18194	NC30-D9:N2-D9	C06349	C06349	C17H19NO3	M+H, M+NH4	37.7	0	-4.60534	94.0251	(R)-Coclaurine; 6-Methoxy-7-hydroxy-(1R)-[(4-hydroxyphenyl)methyl]-1,2,3,4-tetrahydroisoquinoline; (R)-1,2,3,4-Tetrahydro-1-[(4-hydroxyphenyl)methyl]-6-methoxy-7-isoquinolinol;	null	null	null	303.173	285.135	5.61583	1	NULL
4.29_396.0344m/z	5.62_285.1352n	0.694538	0.0168968	1.18194	NC30-D9:N2-D9	C06348	C06348	C17H19NO3	M+H, M+NH4	37.7	0	-4.60534	94.0251	(R,S)-Coclaurine; dl-Coclaurine; 6-Methoxy-7-hydroxy-1-[(4-hydroxyphenyl)methyl]-1,2,3,4-tetrahydroisoquinoline; Machiline;	null	null	null	303.173	285.135	5.61583	1	NULL
4.29_435.1817m/z	5.62_285.1352n	0.694538	0.0168968	1.18194	NC30-D9:N2-D9	C06161	C06161	C17H19NO3	M+H, M+NH4	37.7	0	-4.60534	94.0251	(S)-Coclaurine; Coclaurine; (S)-1,2,3,4-Tetrahydro-1-[(4-hydroxyphenyl)methyl]-6-methoxy-7-isoquinolinol; 1-(p-Hydroxybenzyl)-6-methoxy-7-hydroxy-1,2,3,4-tetrahydroisoquinoline;	null	null	null	303.173	285.135	5.61583	1	map00950 Isoquinoline alkaloid biosynthesis; map01063 Biosynthesis of alkaloids derived from shikimate pathway; map01100 Metabolic pathways; map01110 Biosynthesis of secondary metabolites
4.29_460.2339m/z	5.62_285.1352n	0.694538	0.0168968	1.18194	NC30-D9:N2-D9	C01516	C01516	C17H19NO3	M+H, M+NH4	37.7	0	-4.60534	94.0251	Morphine;	Alkaloids and derivatives	Morphinans	null	303.173	285.135	5.61583	1	map00950 Isoquinoline alkaloid biosynthesis; map00982 Drug metabolism - cytochrome P450; map01063 Biosynthesis of alkaloids derived from shikimate pathway; map01100 Metabolic pathways; map01110 Biosynthesis of secondary metabolites; map04080 Neuroactive ligand-receptor interaction
4.33_132.0438m/z	5.62_285.1352n	0.694538	0.0168968	1.18194	NC30-D9:N2-D9	C16576	C16576	C17H19NO3	M+H, M+NH4	37.7	0	-4.60534	94.0251	Norcodeine; N-Desmethylcodeine;	Alkaloids and derivatives	Morphinans	null	303.173	285.135	5.61583	1	map00982 Drug metabolism - cytochrome P450
4.33_345.1409m/z	5.62_285.1352n	0.694538	0.0168968	1.18194	NC30-D9:N2-D9	C03882	C03882	C17H19NO3	M+H, M+NH4	37.7	0	-4.60534	94.0251	Piperine; N-[(E,E)-Piperoyl]piperidine; 1-Piperoyl-piperidine;	Alkaloids and derivatives	null	null	303.173	285.135	5.61583	1	map00960 Tropane, piperidine and pyridine alkaloid biosynthesis; map01064 Biosynthesis of alkaloids derived from ornithine, lysine and nicotinic acid
4.36_164.0922m/z	5.64_561.2063m/z	5.16325	0.0168968	3.41843	NC30-D9:N2-D9	C01661	C01661	C27H29NO11	M+NH4	38.6	0	-2.86478	96.5626	Doxorubicin; Adriamycin;	Phenylpropanoids and polyketides	Anthracyclines	null	561.206	NA	5.6444	1	map01057 Biosynthesis of type II polyketide products; map01130 Biosynthesis of antibiotics
4.36_296.1341m/z	5.64_561.2063m/z	5.16325	0.0168968	3.41843	NC30-D9:N2-D9	C11230	C11230	C27H29NO11	M+NH4	38.6	0	-2.86478	96.5626	Epirubicin;	Phenylpropanoids and polyketides	Anthracyclines	null	561.206	NA	5.6444	1	NULL
4.36_413.1405m/z	5.64_561.2063m/z	5.16325	0.0168968	3.41843	NC30-D9:N2-D9	C12427	C12427	C27H29NO11	M+NH4	38.6	0	-2.86478	96.5626	10-Carboxy-13-deoxycarminomycin; D 788-1;	null	null	null	561.206	NA	5.6444	1	map01057 Biosynthesis of type II polyketide products; map01130 Biosynthesis of antibiotics
4.36_661.1989m/z	5.70_160.0748m/z	2.20026	0.0358863	2.12682	NC30-D9:N2-D9	C14789	C14789	C10H9NO	M+H	37.3	0	-5.90849	93.1079	N-Hydroxy-1-aminonaphthalene; 1-Naphthylhydroxylamine;	Benzenoids	Naphthalenes	null	160.075	NA	5.70155	1	map00980 Metabolism of xenobiotics by cytochrome P450
4.40_383.1308n	5.70_160.0748m/z	2.20026	0.0358863	2.12682	NC30-D9:N2-D9	C00637	C00637	C10H9NO	M+H	37.3	0	-5.90849	93.1079	Indole-3-acetaldehyde; 2-(Indol-3-yl)acetaldehyde; Indoleacetaldehyde;	Organoheterocyclic compounds	Indoles and derivatives	Indoles	160.075	NA	5.70155	1	map00380 Tryptophan metabolism; map01100 Metabolic pathways
4.40_419.1806m/z	5.70_160.0748m/z	2.20026	0.0358863	2.12682	NC30-D9:N2-D9	C06345	C06345	C10H9NO	M+H	37.3	0	-5.90849	93.1079	3-Methyl-quinolin-2-ol;	null	null	null	160.075	NA	5.70155	1	NULL
4.55_289.1216m/z	5.70_160.0748m/z	2.20026	0.0358863	2.12682	NC30-D9:N2-D9	C10663	C10663	C10H9NO	M+H	37.3	0	-5.90849	93.1079	Echinopsine;	null	null	null	160.075	NA	5.70155	1	NULL
4.58_431.1877m/z	5.70_160.0748m/z	2.20026	0.0358863	2.12682	NC30-D9:N2-D9	C21873	C21873	C10H9NO	M+H	37.3	0	-5.90849	93.1079	2-Methylquinolin-4-ol; 2-Methyl-4-hydroxyquinoline;	null	null	null	160.075	NA	5.70155	1	map00999 Biosynthesis of secondary metabolites - unclassified; map01130 Biosynthesis of antibiotics
4.63_302.2052m/z	5.76_169.1205m/z	0.608525	0.0168968	1.13698	NC30-D9:N2-D9	C14271	C14271	C8H18O2	M+Na	35.7	0	4.30579	83.7549	Ethohexadiol; 2-Ethyl-1,3-hexanediol;	null	null	null	169.121	NA	5.75868	1	NULL
4.65_300.1057m/z	5.76_169.1205m/z	0.608525	0.0168968	1.13698	NC30-D9:N2-D9	C14218	C14218	C8H18O2	M+Na	35.7	0	4.30579	83.7549	Octane-1,8-diol; 1,8-Octanediol;	null	null	null	169.121	NA	5.75868	1	NULL
4.78_1032.4822m/z	5.76_169.1205m/z	0.608525	0.0168968	1.13698	NC30-D9:N2-D9	C14273	C14273	C8H18O2	M+Na	35.7	0	4.30579	83.7549	1,2-Octanediol; 1,2-Dihydroxyoctane;	null	null	null	169.121	NA	5.75868	1	NULL
4.85_109.0525n	5.83_714.3231m/z	7.55479	0.0309614	3.14442	NC30-D9:N2-D9	C21445	C21445	C33H50N5O9P	M+Na	35.7	0	-1.10231	80.0578	17-(4-Hydroxyphenyl)heptadecanoyl adenylate;	null	null	null	714.323	NA	5.83012	1	NULL
4.85_119.9840m/z	5.99_387.1307m/z	2.09061	0.030027	2.42366	NC30-D9:N2-D9	C10145	C10145	C18H24N2O5	M+K	36.1	0	-2.7351	83.7773	Funebrine;	null	null	null	387.131	NA	5.99372	1	NULL
4.85_124.0755m/z	5.99_387.1307m/z	2.09061	0.030027	2.42366	NC30-D9:N2-D9	C11720	C11720	C18H24N2O5	M+K	36.1	0	-2.7351	83.7773	Enalaprilat; Enalaprilate;	Organic acids and derivatives	Carboxylic acids and derivatives	Amino acids, peptides, and analogues	387.131	NA	5.99372	1	NULL
4.85_137.0477n	6.01_325.1600m/z	3.67802	0.0168968	3.12967	NC30-D9:N2-D9	C17403	C17403	C16H26N2O4S	M+H-H2O	47.9	52.8	5.77431	93.3018	Penicillin K; Penicillin A;	null	null	null	325.16	NA	6.008	1	NULL
4.85_152.0702m/z	6.04_317.1877m/z	0.537361	0.020283	1.13552	NC30-D9:N2-D9	C08364	C08364	C18H30O2	M+K	39.1	0	-0.0681868	95.6547	Punicic acid; cis-9,trans-11,cis-13-Octadecatrienoic acid; Trichosanic acid;	null	null	null	317.188	NA	6.03657	1	NULL
4.85_97.0646m/z	6.04_317.1877m/z	0.537361	0.020283	1.13552	NC30-D9:N2-D9	C06426	C06426	C18H30O2	M+K	39.1	0	-0.0681868	95.6547	(6Z,9Z,12Z)-Octadecatrienoic acid; 6,9,12-Octadecatrienoic acid; gamma-Linolenic acid; Gamolenic acid;	Lipids and lipid-like molecules	Fatty Acyls	Lineolic acids and derivatives	317.188	NA	6.03657	1	map00591 Linoleic acid metabolism; map01040 Biosynthesis of unsaturated fatty acids; map01100 Metabolic pathways
4.87_560.2952m/z	6.04_317.1877m/z	0.537361	0.020283	1.13552	NC30-D9:N2-D9	C08315	C08315	C18H30O2	M+K	39.1	0	-0.0681868	95.6547	(9Z,11E,13E)-Octadecatrienoic acid; (9Z,11E,13E)-9,11,13-Octadecatrienoic acid; alpha-Eleostearic acid;	null	null	null	317.188	NA	6.03657	1	NULL
4.96_250.1103m/z	6.04_317.1877m/z	0.537361	0.020283	1.13552	NC30-D9:N2-D9	C15201	C15201	C18H30O2	M+K	39.1	0	-0.0681868	95.6547	5beta-Estrane-3alpha,17beta-diol; 19-Nor-5beta-androstane-3alpha,17beta-diol;	null	null	null	317.188	NA	6.03657	1	NULL
4.96_412.1636m/z	6.04_317.1877m/z	0.537361	0.020283	1.13552	NC30-D9:N2-D9	C06427	C06427	C18H30O2	M+K	39.1	0	-0.0681868	95.6547	(9Z,12Z,15Z)-Octadecatrienoic acid; alpha-Linolenic acid; 9,12,15-Octadecatrienoic acid; Linolenate; alpha-Linolenate;	Lipids and lipid-like molecules	Fatty Acyls	Lineolic acids and derivatives	317.188	NA	6.03657	1	map00592 alpha-Linolenic acid metabolism; map01040 Biosynthesis of unsaturated fatty acids; map01060 Biosynthesis of plant secondary metabolites; map01070 Biosynthesis of plant hormones; map01100 Metabolic pathways; map01110 Biosynthesis of secondary metabolites
5.03_462.2855m/z	6.04_317.1877m/z	0.537361	0.020283	1.13552	NC30-D9:N2-D9	C07289	C07289	C18H30O2	M+K	39.1	0	-0.0681868	95.6547	Crepenynate; (9Z)-Octadec-9-en-12-ynoate; (Z)-9-Octadecen-12-ynoic acid; Crepenynic acid;	null	null	null	317.188	NA	6.03657	1	map00591 Linoleic acid metabolism; map01060 Biosynthesis of plant secondary metabolites
5.06_283.0715m/z	6.08_215.1632m/z	0.620088	0.0202009	1.25992	NC30-D9:N2-D9	C02367	C02367	C12H22O3	M+H	36.8	0	-4.52394	89.4947	3-Oxododecanoic acid; 3-Oxododecanoate;	Organic acids and derivatives	Keto acids and derivatives	Medium-chain keto acids and derivatives	215.163	NA	6.07943	1	NULL
5.12_154.0987n	6.21_144.0803m/z	3.62044	0.0168968	2.40902	NC30-D9:N2-D9	C00955	C00955	C10H11NO	M+H-H2O	39	0	-3.23672	99.0293	Indole-3-ethanol; Tryptophol;	Organoheterocyclic compounds	Indoles and derivatives	Indoles	144.08	NA	6.21445	1	map00380 Tryptophan metabolism
5.12_272.0550m/z	6.23_231.1572m/z	0.708271	0.0187319	1.00582	NC30-D9:N2-D9	C14523	C14523	C12H22O4	M+H	37.6	0	-8.20496	97.1287	Diisopropyl adipate;	Lipids and lipid-like molecules	Fatty Acyls	Fatty acid esters	231.157	NA	6.22873	1	NULL
5.17_399.2579m/z	6.23_231.1572m/z	0.708271	0.0187319	1.00582	NC30-D9:N2-D9	C02678	C02678	C12H22O4	M+H	37.6	0	-8.20496	97.1287	Dodecanedioic acid;	Lipids and lipid-like molecules	Fatty Acyls	Fatty acids and conjugates	231.157	NA	6.22873	1	NULL
5.31_299.1442m/z	6.23_231.1572m/z	0.708271	0.0187319	1.00582	NC30-D9:N2-D9	C19143	C19143	C12H22O4	M+H	37.6	0	-8.20496	97.1287	Dibutyl succinate;	null	null	null	231.157	NA	6.22873	1	NULL
5.35_209.1996m/z	6.43_252.1560m/z	0.597614	0.0306153	1.34739	NC30-D9:N2-D9	C12025	C12025	C9H18N2O5	M+NH4	37.2	0	2.42319	88.8005	2,6-Diamino-7-hydroxy-azelaic acid;	null	null	null	252.156	NA	6.42873	1	NULL
5.47_577.2014m/z	6.46_412.1646m/z	4.81765	0.0187712	2.91716	NC30-D9:N2-D9	C13906	C13906	C20H24FN3O4	M+Na	38.6	0	0.699889	94.0479	Balofloxacin;	null	null	null	412.165	NA	6.45732	1	NULL
5.60_146.0595m/z	6.50_229.1781m/z	0.689798	0.041871	1.06409	NC30-D9:N2-D9	C19098	C19098	C9H17N5O	M+NH4	34.3	0	4.57769	76.7422	Atraton;	null	null	null	229.178	NA	6.50017	1	NULL
5.62_201.1920n	6.59_219.9875m/z	0.656439	0.0168968	1.06024	NC30-D9:N2-D9	C19511	C19511	C5H10KNO2S2	M+H	34.5	0	5.61158	78.9409	Potassium bis(2-hydroxyethyl)dithiocarbamate; Bis(2-hydroxyethyl)dithiocarbamic acid, potassium salt;	null	null	null	219.988	NA	6.59233	1	NULL
5.62_285.1352n	6.76_307.0936m/z	0.682258	0.0168968	1.05259	NC30-D9:N2-D9	C10484	C10484	C17H16O4	M+Na	38.2	0	-1.72845	93.1728	Phenethyl caffeate; Caffeic acid phenethyl ester;	null	null	null	307.094	NA	6.76377	1	NULL
5.64_561.2063m/z	6.76_307.0936m/z	0.682258	0.0168968	1.05259	NC30-D9:N2-D9	C10246	C10246	C17H16O4	M+Na	38.2	0	-1.72845	93.1728	Batatasin I; 2,5,7-Trimethoxyphenanthren-3-ol;	null	null	null	307.094	NA	6.76377	1	NULL
5.70_160.0748m/z	6.76_307.0936m/z	0.682258	0.0168968	1.05259	NC30-D9:N2-D9	C10265	C10265	C17H16O4	M+Na	38.2	0	-1.72845	93.1728	Isobatatasin I;	null	null	null	307.094	NA	6.76377	1	NULL
5.76_169.1205m/z	6.90_137.0953m/z	0.710494	0.0179167	1.02036	NC30-D9:N2-D9	C09772	C09772	C9H14O2	M+H-H2O	40.4	10.1	-5.35668	97.8288	Boschnialactone;	null	null	null	137.095	NA	6.89878	1	NULL
5.83_714.3231m/z	6.90_302.2672m/z	0.639897	0.0200609	1.08071	NC30-D9:N2-D9	C14996	C14996	C17H32O3	M+NH4	41.3	16	-6.1684	97.7226	12-(2,3-Dihydroxycyclopentyl)-2-dodecanone;	null	null	null	302.267	NA	6.89878	1	NULL
5.91_568.2627m/z	7.14_417.2733m/z	0.70424	0.0355338	1.19053	NC30-D9:N2-D9	C18705	C18705	C24H33NO4	M+NH4	36.1	0.0574	-3.73596	85.0483	Butroxydim;	null	null	null	417.273	NA	7.14165	1	NULL
5.99_387.1307m/z	7.18_181.1574m/z	0.701194	0.0174005	1.05295	NC30-D9:N2-D9	C01633	C01633	C10H22O	M+Na	36.2	0	7.26074	89.389	1-Decanol; n-Decanol; Decyl alcohol;	Lipids and lipid-like molecules	Fatty Acyls	Fatty alcohols	181.157	NA	7.1845	1	NULL
6.01_325.1600m/z	7.23_149.0956m/z	0.689734	0.0278454	1.12376	NC30-D9:N2-D9	C14351	C14351	C10H14O2	M+H-H2O	37.2	0	-2.8688	89.2728	4-Butoxyphenol;	null	null	null	149.096	NA	7.2338	1	NULL
6.04_317.1877m/z	7.23_149.0956m/z	0.689734	0.0278454	1.12376	NC30-D9:N2-D9	C18352	C18352	C10H14O2	M+H-H2O	37.2	0	-2.8688	89.2728	Oxocamphor; 10-Oxocamphor; beta-Oxocamphor;	null	null	null	149.096	NA	7.2338	1	NULL
6.08_215.1632m/z	7.23_149.0956m/z	0.689734	0.0278454	1.12376	NC30-D9:N2-D9	C09791	C09791	C10H14O2	M+H-H2O	37.2	0	-2.8688	89.2728	Nepetalactone cis-trans-form;	null	null	null	149.096	NA	7.2338	1	NULL
6.21_144.0803m/z	7.23_149.0956m/z	0.689734	0.0278454	1.12376	NC30-D9:N2-D9	C11940	C11940	C10H14O2	M+H-H2O	37.2	0	-2.8688	89.2728	Myrtenic acid; 6,6-Dimethylbicyclo[3.1.1]hept-2-ene-2-carboxylic acid;	null	null	null	149.096	NA	7.2338	1	map00903 Limonene and pinene degradation
6.23_231.1572m/z	7.23_149.0956m/z	0.689734	0.0278454	1.12376	NC30-D9:N2-D9	C18343	C18343	C10H14O2	M+H-H2O	37.2	0	-2.8688	89.2728	4-n-Butylresorcinol; Rucinol (TN);	null	null	null	149.096	NA	7.2338	1	NULL
6.43_252.1560m/z	7.23_149.0956m/z	0.689734	0.0278454	1.12376	NC30-D9:N2-D9	C09841	C09841	C10H14O2	M+H-H2O	37.2	0	-2.8688	89.2728	Carvone oxide;	null	null	null	149.096	NA	7.2338	1	NULL
6.46_412.1646m/z	7.23_149.0956m/z	0.689734	0.0278454	1.12376	NC30-D9:N2-D9	C09777	C09777	C10H14O2	M+H-H2O	37.2	0	-2.8688	89.2728	Dolichodial; Iridial;	null	null	null	149.096	NA	7.2338	1	NULL
6.50_229.1781m/z	7.23_149.0956m/z	0.689734	0.0278454	1.12376	NC30-D9:N2-D9	C21929	C21929	C10H14O2	M+H-H2O	37.2	0	-2.8688	89.2728	(-)-Bornane-2,5-dione; 3,6-Diketocamphane;	null	null	null	149.096	NA	7.2338	1	NULL
6.59_219.9875m/z	7.23_149.0956m/z	0.689734	0.0278454	1.12376	NC30-D9:N2-D9	C17690	C17690	C10H14O2	M+H-H2O	37.2	0	-2.8688	89.2728	4-(4-Hydroxyphenyl)-2-butanol; 4-HPB; Rhododendrol; Betuligenol;	null	null	null	149.096	NA	7.2338	1	NULL
6.76_307.0936m/z	7.23_149.0956m/z	0.689734	0.0278454	1.12376	NC30-D9:N2-D9	C17824	C17824	C10H14O2	M+H-H2O	37.2	0	-2.8688	89.2728	(+/-)-Asarinol A;	null	null	null	149.096	NA	7.2338	1	NULL
6.90_137.0953m/z	7.23_149.0956m/z	0.689734	0.0278454	1.12376	NC30-D9:N2-D9	C20320	C20320	C10H14O2	M+H-H2O	37.2	0	-2.8688	89.2728	Bornane-2,6-dione; 6-Oxocamphor;	null	null	null	149.096	NA	7.2338	1	NULL
6.90_302.2672m/z	7.23_149.0956m/z	0.689734	0.0278454	1.12376	NC30-D9:N2-D9	C11924	C11924	C10H14O2	M+H-H2O	37.2	0	-2.8688	89.2728	Perillic acid;	Lipids and lipid-like molecules	Prenol lipids	Monoterpenoids	149.096	NA	7.2338	1	map00903 Limonene and pinene degradation
7.00_357.2844m/z	7.23_149.0956m/z	0.689734	0.0278454	1.12376	NC30-D9:N2-D9	C09887	C09887	C10H14O2	M+H-H2O	37.2	0	-2.8688	89.2728	Piquerol A;	null	null	null	149.096	NA	7.2338	1	NULL
7.14_417.2733m/z	7.23_149.0956m/z	0.689734	0.0278454	1.12376	NC30-D9:N2-D9	C17622	C17622	C10H14O2	M+H-H2O	37.2	0	-2.8688	89.2728	(6E)-8-Oxogeranial; 10-Oxogeranial; 8-Oxogeranial;	null	null	null	149.096	NA	7.2338	1	map00902 Monoterpenoid biosynthesis; map01100 Metabolic pathways; map01110 Biosynthesis of secondary metabolites
7.17_375.2529n	7.23_149.0956m/z	0.689734	0.0278454	1.12376	NC30-D9:N2-D9	C09792	C09792	C10H14O2	M+H-H2O	37.2	0	-2.8688	89.2728	Nepetalactone trans-cis-form;	null	null	null	149.096	NA	7.2338	1	NULL
7.17_449.3477m/z	7.23_149.0956m/z	0.689734	0.0278454	1.12376	NC30-D9:N2-D9	C09896	C09896	C10H14O2	M+H-H2O	37.2	0	-2.8688	89.2728	Rotundifolone; Lippione;	null	null	null	149.096	NA	7.2338	1	NULL
7.18_181.1574m/z	7.23_149.0956m/z	0.689734	0.0278454	1.12376	NC30-D9:N2-D9	C14515	C14515	C10H14O2	M+H-H2O	37.2	0	-2.8688	89.2728	Camphorquinone;	null	null	null	149.096	NA	7.2338	1	NULL
7.23_149.0956m/z	7.23_149.0956m/z	0.689734	0.0278454	1.12376	NC30-D9:N2-D9	C03037	C03037	C10H14O2	M+H-H2O	37.2	0	-2.8688	89.2728	(+)-Bornane-2,5-dione; 2,5-Diketocamphane;	null	null	null	149.096	NA	7.2338	1	NULL
7.23_281.1353m/z	7.23_281.1353m/z	0.70603	0.0445753	1.01166	NC30-D9:N2-D9	C20706	C20706	C10H17NO7	M+NH4	36.4	0	3.77019	86.4515	4-O-(beta-L-Arabinofuranosyl)-(2S,4S)-4-hydroxyproline;	null	null	null	281.135	NA	7.2338	1	NULL
7.23_421.2179m/z	7.26_374.0908m/z	0.658206	0.0168968	1.09875	NC30-D9:N2-D9	C18761	C18761	C14H20N3O5PS	M+H	26.8	0	-7.01523	41.8782	Pyrazophos;	null	null	null	374.091	NA	7.26238	1	NULL
7.26_374.0908m/z	7.26_420.1669m/z	0.704687	0.0168968	1.05909	NC30-D9:N2-D9	C20607	C20607	C22H27N3O3	M+K	31.6	0	-3.82834	62.3642	Tryprostatin A; (3S,8aS)-3-{[6-Methoxy-2-(3-methylbut-2-en-1-yl)-1H-indol-3-yl]methyl}hexahydropyrrolo[1,2-a]pyrazine-1,4-dione;	null	null	null	420.167	NA	7.26238	1	map00404 Staurosporine biosynthesis; map01130 Biosynthesis of antibiotics
7.26_420.1669m/z	7.63_272.2566m/z	0.689585	0.0168968	1.04791	NC30-D9:N2-D9	C08362	C08362	C16H30O2	M+NH4	38	0	-7.1401	97.9478	(9Z)-Hexadecenoic acid; Palmitoleic acid; cis-9-Hexadecenoic acid; (9Z)-Hexadec-9-enoate;	Lipids and lipid-like molecules	Fatty Acyls	Fatty acids and conjugates	272.257	NA	7.62597	1	map00061 Fatty acid biosynthesis
7.48_285.2660n	7.63_272.2566m/z	0.689585	0.0168968	1.04791	NC30-D9:N2-D9	C21942	C21942	C16H30O2	M+NH4	38	0	-7.1401	97.9478	Sapienic acid; (6Z)-Hexadecenoic acid; 6Z-Hexadecenoic acid; (Z)-Hexadec-6-enoic acid;	null	null	null	272.257	NA	7.62597	1	NULL
7.63_272.2566m/z	7.83_399.0431m/z	0.687694	0.0168968	1.0089	NC30-D9:N2-D9	C19487	C19487	C14H12N6O6	M+K	35.6	0	-5.23073	83.7963	Nitrovin; Difurazone;	null	null	null	399.043	NA	7.82598	1	NULL
7.83_399.0431m/z	7.85_307.0931m/z	0.695375	0.0168968	1.0082	NC30-D9:N2-D9	C11184	C11184	C8H12N5O5P	M+NH4	40.2	12	5.72917	95.5401	PMEG; 9-((2-Phosphonylmethoxy)ethyl)guanine;	null	null	null	307.093	NA	7.85455	1	NULL
7.85_307.0931m/z	7.87_427.1158m/z	0.648197	0.0168968	1.17834	NC30-D9:N2-D9	C10891	C10891	C21H24O7	M+K	37.2	0	1.05925	87.1259	Trachelogenin; (-)-Trachelogenin;	null	null	null	427.116	NA	7.86883	1	NULL
7.87_427.1158m/z	7.87_427.1158m/z	0.648197	0.0168968	1.17834	NC30-D9:N2-D9	C09260	C09260	C21H24O7	M+K	37.2	0	1.05925	87.1259	Dihydrosamidin;	null	null	null	427.116	NA	7.86883	1	NULL
8.00_250.2150m/z	7.87_427.1158m/z	0.648197	0.0168968	1.17834	NC30-D9:N2-D9	C09316	C09316	C21H24O7	M+K	37.2	0	1.05925	87.1259	Visnadin; Visnadine;	null	null	null	427.116	NA	7.86883	1	NULL
8.02_273.2062m/z	7.87_427.1158m/z	0.648197	0.0168968	1.17834	NC30-D9:N2-D9	C09059	C09059	C21H24O7	M+K	37.2	0	1.05925	87.1259	Alectrol; Orobanchyl acetate;	null	null	null	427.116	NA	7.86883	1	NULL
8.03_100.0520n	8.00_250.2150m/z	0.712047	0.0207622	1.27983	NC30-D9:N2-D9	C20034	C20034	C16H29NO2	M+H-H2O	30.5	0	-5.63704	58.8645	Allopumiliotoxin 267A;	null	null	null	250.215	NA	8.00385	1	NULL
8.05_309.1240m/z	8.02_273.2062m/z	0.770365	0.0258616	1.15666	NC30-D9:N2-D9	C07180	C07180	C16H21N3	M+NH4	30.8	0	-4.43284	59.2096	Tripelennamine;	Benzenoids	Benzene and substituted derivatives	Benzylamines	273.206	NA	8.01815	1	NULL
8.12_404.1159n	8.03_100.0520n	0.6988	0.0229508	1.02974	NC30-D9:N2-D9	C15499	C15499	C5H8O2	M+H-H2O, M+H	38	0	-4.69194	95.2195	Pentane-2,4-dione; Acetylacetone; 2,4-Dioxopentane;	Organic oxygen compounds	Organooxygen compounds	Carbonyl compounds	83.0487	100.052	8.03243	1	NULL
8.19_167.0335m/z	8.03_100.0520n	0.6988	0.0229508	1.02974	NC30-D9:N2-D9	C08279	C08279	C5H8O2	M+H-H2O, M+H	38	0	-4.69194	95.2195	Tiglic acid; (E)-2,3-Dimethylacrylic acid;	Lipids and lipid-like molecules	Fatty Acyls	Fatty acids and conjugates	83.0487	100.052	8.03243	1	NULL
8.19_173.0407m/z	8.03_100.0520n	0.6988	0.0229508	1.02974	NC30-D9:N2-D9	C12518	C12518	C5H8O2	M+H-H2O, M+H	38	0	-4.69194	95.2195	Glutaral; 1,5-Pentanedial; Glutaraldehyde;	Organic oxygen compounds	Organooxygen compounds	Carbonyl compounds	83.0487	100.052	8.03243	1	NULL
8.19_218.9812n	8.03_100.0520n	0.6988	0.0229508	1.02974	NC30-D9:N2-D9	C14527	C14527	C5H8O2	M+H-H2O, M+H	38	0	-4.69194	95.2195	Methyl methacrylate; MMA; Methyl 2-methylpropenoate;	null	null	null	83.0487	100.052	8.03243	1	map05204 Chemical carcinogenesis
8.19_298.1350m/z	8.03_100.0520n	0.6988	0.0229508	1.02974	NC30-D9:N2-D9	C02240	C02240	C5H8O2	M+H-H2O, M+H	38	0	-4.69194	95.2195	5-Valerolactone; delta-Valerolactone; gamma-Valerolactone;	null	null	null	83.0487	100.052	8.03243	1	NULL
8.19_298.6360m/z	8.03_100.0520n	0.6988	0.0229508	1.02974	NC30-D9:N2-D9	C19238	C19238	C5H8O2	M+H-H2O, M+H	38	0	-4.69194	95.2195	Ethyl acrylate;	Organic acids and derivatives	Carboxylic acids and derivatives	Acrylic acids and derivatives	83.0487	100.052	8.03243	1	NULL
8.19_301.0132m/z	8.05_309.1240m/z	0.716054	0.0327014	1.0232	NC30-D9:N2-D9	C14261	C14261	C18H22O2	M+K	40.1	17.7	-4.38607	87.8054	Trenbolone; 17-beta-Hydroxyestra-4,9,11-trien-3-one;	null	null	null	309.124	NA	8.04672	1	NULL
8.19_516.2056n	8.12_404.1159n	0.681444	0.0168968	1.07832	NC30-D9:N2-D9	C07317	C07317	C23H20N2O3S	M+Na, M+K	37.3	0	-8.85244	96.3285	Sulfinpyrazone; Sulfoxyphenylpyrazolidine;	Benzenoids	Benzene and substituted derivatives	Phenyl sulfoxides	427.105	404.116	8.11815	1	NULL
8.20_163.9986m/z	8.19_167.0335m/z	0.661572	0.0351518	1.21638	NC30-D9:N2-D9	C03590	C03590	C8H6O4	M+H	47.4	41.4	-2.47516	98.6942	4-Hydroxyphenylglyoxylate; 4-Hydroxybenzoylformate; 4-Hydroxyphenylglyoxylic acid; 2-(4-Hydroxyphenyl)-2-oxoacetate;	null	null	null	167.033	NA	8.18958	1	map00261 Monobactam biosynthesis; map00627 Aminobenzoate degradation; map01055 Biosynthesis of vancomycin group antibiotics; map01120 Microbial metabolism in diverse environments; map01130 Biosynthesis of antibiotics
8.20_172.0523m/z	8.19_173.0407m/z	0.666283	0.0168968	1.11773	NC30-D9:N2-D9	C00216	C00216	C5H10O5	M+Na	37.4	2.75	-8.72709	94.0411	D-Arabinose;	null	null	null	173.041	NA	8.18958	1	NULL
8.20_277.0261n	8.19_173.0407m/z	0.666283	0.0168968	1.11773	NC30-D9:N2-D9	C16639	C16639	C5H10O5	M+Na	37.4	2.75	-8.72709	94.0411	beta-D-Ribofuranose;	null	null	null	173.041	NA	8.18958	1	NULL
8.20_460.1425n	8.19_173.0407m/z	0.666283	0.0168968	1.11773	NC30-D9:N2-D9	C00309	C00309	C5H10O5	M+Na	37.4	2.75	-8.72709	94.0411	D-Ribulose; D-erythro-2-Pentulose; D-Arabinoketose; D-Arabinulose; D-Riboketose;	null	null	null	173.041	NA	8.18958	1	map00040 Pentose and glucuronate interconversions; map01100 Metabolic pathways
8.20_463.0353m/z	8.19_173.0407m/z	0.666283	0.0168968	1.11773	NC30-D9:N2-D9	C00181	C00181	C5H10O5	M+Na	37.4	2.75	-8.72709	94.0411	D-Xylose; Wood sugar;	Organic oxygen compounds	Organooxygen compounds	Carbohydrates and carbohydrate conjugates	173.041	NA	8.18958	1	map00040 Pentose and glucuronate interconversions; map00520 Amino sugar and nucleotide sugar metabolism; map01100 Metabolic pathways; map02010 ABC transporters
8.25_188.5749m/z	8.19_173.0407m/z	0.666283	0.0168968	1.11773	NC30-D9:N2-D9	C01510	C01510	C5H10O5	M+Na	37.4	2.75	-8.72709	94.0411	L-Xylose; L-Xylofuranose;	null	null	null	173.041	NA	8.18958	1	NULL
8.37_269.2750n	8.19_173.0407m/z	0.666283	0.0168968	1.11773	NC30-D9:N2-D9	C00259	C00259	C5H10O5	M+Na	37.4	2.75	-8.72709	94.0411	L-Arabinose; L-Arabinopyranose;	Organic oxygen compounds	Organooxygen compounds	Carbohydrates and carbohydrate conjugates	173.041	NA	8.18958	1	map00040 Pentose and glucuronate interconversions; map00053 Ascorbate and aldarate metabolism; map00520 Amino sugar and nucleotide sugar metabolism; map01100 Metabolic pathways; map02010 ABC transporters
8.37_296.1126m/z	8.19_173.0407m/z	0.666283	0.0168968	1.11773	NC30-D9:N2-D9	C20569	C20569	C5H10O5	M+Na	37.4	2.75	-8.72709	94.0411	beta-L-Arabinofuranose;	Organic oxygen compounds	Organooxygen compounds	Carbohydrates and carbohydrate conjugates	173.041	NA	8.18958	1	NULL
8.38_528.3069m/z	8.19_173.0407m/z	0.666283	0.0168968	1.11773	NC30-D9:N2-D9	C21067	C21067	C5H10O5	M+Na	37.4	2.75	-8.72709	94.0411	D-Arabinofuranose;	null	null	null	173.041	NA	8.18958	1	NULL
8.45_355.1050m/z	8.19_173.0407m/z	0.666283	0.0168968	1.11773	NC30-D9:N2-D9	C00476	C00476	C5H10O5	M+Na	37.4	2.75	-8.72709	94.0411	D-Lyxose;	null	null	null	173.041	NA	8.18958	1	map00040 Pentose and glucuronate interconversions
8.48_313.2330m/z	8.19_173.0407m/z	0.666283	0.0168968	1.11773	NC30-D9:N2-D9	C06115	C06115	C5H10O5	M+Na	37.4	2.75	-8.72709	94.0411	L-Arabinofuranose;	Organic oxygen compounds	Organooxygen compounds	Carbohydrates and carbohydrate conjugates	173.041	NA	8.18958	1	NULL
8.50_417.3335m/z	8.19_173.0407m/z	0.666283	0.0168968	1.11773	NC30-D9:N2-D9	C21382	C21382	C5H10O5	M+Na	37.4	2.75	-8.72709	94.0411	R-THMF; (2R,4S)-2-Methyl-2,3,3,4-tetrahydroxytetrahydrofuran;	null	null	null	173.041	NA	8.18958	1	map02024 Quorum sensing; map02026 Biofilm formation - Escherichia coli
8.52_479.2113m/z	8.19_173.0407m/z	0.666283	0.0168968	1.11773	NC30-D9:N2-D9	C02479	C02479	C5H10O5	M+Na	37.4	2.75	-8.72709	94.0411	beta-L-Arabinose;	null	null	null	173.041	NA	8.18958	1	NULL
8.52_494.1775n	8.19_173.0407m/z	0.666283	0.0168968	1.11773	NC30-D9:N2-D9	C00310	C00310	C5H10O5	M+Na	37.4	2.75	-8.72709	94.0411	D-Xylulose; D-threo-Pentulose; D-Lyxulose;	Organic oxygen compounds	Organooxygen compounds	Carbohydrates and carbohydrate conjugates	173.041	NA	8.18958	1	map00040 Pentose and glucuronate interconversions; map01100 Metabolic pathways
8.54_486.2546m/z	8.19_173.0407m/z	0.666283	0.0168968	1.11773	NC30-D9:N2-D9	C08353	C08353	C5H10O5	M+Na	37.4	2.75	-8.72709	94.0411	beta-D-Ribopyranose; Ribose;	null	null	null	173.041	NA	8.18958	1	NULL
8.54_511.3273m/z	8.19_173.0407m/z	0.666283	0.0168968	1.11773	NC30-D9:N2-D9	C00508	C00508	C5H10O5	M+Na	37.4	2.75	-8.72709	94.0411	L-Ribulose; L-erythro-Pentulose; L-Arabinoketose; L-Arabinulose; L-Riboketose;	null	null	null	173.041	NA	8.18958	1	map00040 Pentose and glucuronate interconversions; map01100 Metabolic pathways
8.54_523.1736m/z	8.19_173.0407m/z	0.666283	0.0168968	1.11773	NC30-D9:N2-D9	C21057	C21057	C5H10O5	M+Na	37.4	2.75	-8.72709	94.0411	D-Ribose; D-Ribopyranose;	null	null	null	173.041	NA	8.18958	1	NULL
8.55_265.1021m/z	8.19_173.0407m/z	0.666283	0.0168968	1.11773	NC30-D9:N2-D9	C02604	C02604	C5H10O5	M+Na	37.4	2.75	-8.72709	94.0411	alpha-L-Arabinose;	null	null	null	173.041	NA	8.18958	1	NULL
8.55_448.1899n	8.19_173.0407m/z	0.666283	0.0168968	1.11773	NC30-D9:N2-D9	C02204	C02204	C5H10O5	M+Na	37.4	2.75	-8.72709	94.0411	alpha-D-Lyxose;	null	null	null	173.041	NA	8.18958	1	NULL
8.55_499.1748m/z	8.19_173.0407m/z	0.666283	0.0168968	1.11773	NC30-D9:N2-D9	C00121	C00121	C5H10O5	M+Na	37.4	2.75	-8.72709	94.0411	D-Ribose;	Organic oxygen compounds	Organooxygen compounds	Carbohydrates and carbohydrate conjugates	173.041	NA	8.18958	1	map00030 Pentose phosphate pathway; map02010 ABC transporters; map02030 Bacterial chemotaxis
8.59_310.2489n	8.19_173.0407m/z	0.666283	0.0168968	1.11773	NC30-D9:N2-D9	C08354	C08354	C5H10O5	M+Na	37.4	2.75	-8.72709	94.0411	alpha-D-Ribulose;	null	null	null	173.041	NA	8.18958	1	NULL
8.63_268.1129m/z	8.19_173.0407m/z	0.666283	0.0168968	1.11773	NC30-D9:N2-D9	C01508	C01508	C5H10O5	M+Na	37.4	2.75	-8.72709	94.0411	L-Lyxose;	null	null	null	173.041	NA	8.18958	1	map00040 Pentose and glucuronate interconversions
8.65_494.1765n	8.19_173.0407m/z	0.666283	0.0168968	1.11773	NC30-D9:N2-D9	C01394	C01394	C5H10O5	M+Na	37.4	2.75	-8.72709	94.0411	Xylose;	null	null	null	173.041	NA	8.18958	1	NULL
8.65_523.1737m/z	8.19_173.0407m/z	0.666283	0.0168968	1.11773	NC30-D9:N2-D9	C02205	C02205	C5H10O5	M+Na	37.4	2.75	-8.72709	94.0411	alpha-D-Xylose;	null	null	null	173.041	NA	8.18958	1	NULL
8.66_464.2377n	8.19_173.0407m/z	0.666283	0.0168968	1.11773	NC30-D9:N2-D9	C00312	C00312	C5H10O5	M+Na	37.4	2.75	-8.72709	94.0411	L-Xylulose; L-threo-Pentulose; L-Lyxulose;	null	null	null	173.041	NA	8.18958	1	map00040 Pentose and glucuronate interconversions; map01100 Metabolic pathways
8.66_471.1795m/z	8.19_173.0407m/z	0.666283	0.0168968	1.11773	NC30-D9:N2-D9	C02096	C02096	C5H10O5	M+Na	37.4	2.75	-8.72709	94.0411	beta-D-Xylose;	null	null	null	173.041	NA	8.18958	1	NULL
8.66_827.4395m/z	8.19_298.1350m/z	0.674974	0.0168968	1.12262	NC30-D9:N2-D9	C21730	C21730	C11H21N3O5	M+Na	38.8	5.49	-8.42888	97.9665	epsilon-(gamma-L-Glutamyl)-L-lysine;	Organic acids and derivatives	Carboxylic acids and derivatives	Amino acids, peptides, and analogues	298.135	NA	8.18958	1	NULL
8.69_568.4160m/z	8.19_301.0132m/z	0.703812	0.0168968	1.01628	NC30-D9:N2-D9	C16264	C16264	C13H10O6	M+K	42	22.3	8.63497	97.4728	2-Hydroxy-6-oxo-6-(2-carboxyphenyl)-hexa-2,4-dienoate;	null	null	null	301.013	NA	8.18958	1	map00624 Polycyclic aromatic hydrocarbon degradation; map01100 Metabolic pathways; map01120 Microbial metabolism in diverse environments
8.70_286.2378m/z	8.20_163.9986m/z	0.601734	0.0168968	1.35476	NC30-D9:N2-D9	C10910	C10910	C8H7NS2	M+H-H2O	37.6	1.03	-0.779836	87.9635	2-Methylthiobenzothiazole;	null	null	null	163.999	NA	8.20387	1	NULL
8.72_544.1353m/z	8.20_172.0523m/z	0.691442	0.018323	1.00998	NC30-D9:N2-D9	C07155	C07155	C9H11N	M+K	38.2	1.14	-0.314935	90.3379	Tranylcypromine;	Organic nitrogen compounds	Organonitrogen compounds	Amines	172.052	NA	8.20387	1	NULL
8.73_497.1946m/z	8.20_463.0353m/z	0.464555	0.0210938	1.49667	NC30-D9:N2-D9	C06894	C06894	C16H16N4O8S	M+K	37.4	5.61	7.73227	89.9319	Cefuroxime;	Organoheterocyclic compounds	Lactams	Beta lactams	463.035	NA	8.20387	1	NULL
8.73_610.3185m/z	8.37_296.1126m/z	0.698005	0.0168968	1.2431	NC30-D9:N2-D9	C04273	C04273	C14H17NO6	M+H	34.6	0	-0.866893	74.1406	(S)-Mandelonitrile beta-D-glucoside;	Organooxygen compounds	Carbohydrates and carbohydrate conjugates	Glycosyl compounds	296.113	NA	8.36745	1	NULL
8.79_240.0957m/z	8.37_296.1126m/z	0.698005	0.0168968	1.2431	NC30-D9:N2-D9	C08481	C08481	C14H17NO6	M+H	34.6	0	-0.866893	74.1406	Indican; Indican, plant;	null	null	null	296.113	NA	8.36745	1	NULL
8.79_266.1089m/z	8.37_296.1126m/z	0.698005	0.0168968	1.2431	NC30-D9:N2-D9	C18873	C18873	C14H17NO6	M+H	34.6	0	-0.866893	74.1406	Nitrothal-isopropyl;	null	null	null	296.113	NA	8.36745	1	NULL
8.79_471.1562m/z	8.37_296.1126m/z	0.698005	0.0168968	1.2431	NC30-D9:N2-D9	C00844	C00844	C14H17NO6	M+H	34.6	0	-0.866893	74.1406	Prunasin; (R)-Prunasin;	Organic oxygen compounds	Organooxygen compounds	Carbohydrates and carbohydrate conjugates	296.113	NA	8.36745	1	map00460 Cyanoamino acid metabolism; map01110 Biosynthesis of secondary metabolites
8.79_562.2426m/z	8.45_355.1050m/z	0.675838	0.0174005	1.13027	NC30-D9:N2-D9	C01527	C01527	C16H18O9	M+H	37.7	0.0156	7.3549	96.5374	Scopolin;	null	null	null	355.105	NA	8.45317	1	map00940 Phenylpropanoid biosynthesis; map01061 Biosynthesis of phenylpropanoids; map01110 Biosynthesis of secondary metabolites
8.83_404.2792m/z	8.45_355.1050m/z	0.675838	0.0174005	1.13027	NC30-D9:N2-D9	C17147	C17147	C16H18O9	M+H	37.7	0.0156	7.3549	96.5374	Neochlorogenic acid; trans-Neochlorogenic acid; Neochlorogenate;	null	null	null	355.105	NA	8.45317	1	NULL
8.83_426.2627m/z	8.45_355.1050m/z	0.675838	0.0174005	1.13027	NC30-D9:N2-D9	C08996	C08996	C16H18O9	M+H	37.7	0.0156	7.3549	96.5374	Biflorin;	Organic oxygen compounds	Organooxygen compounds	Carbohydrates and carbohydrate conjugates	355.105	NA	8.45317	1	NULL
8.85_305.2642m/z	8.45_355.1050m/z	0.675838	0.0174005	1.13027	NC30-D9:N2-D9	C00852	C00852	C16H18O9	M+H	37.7	0.0156	7.3549	96.5374	Chlorogenate; Chlorogenic acid; Caffeoyl quinic acid; trans-5-O-Caffeoyl-D-quinate;	Organic oxygen compounds	Organooxygen compounds	Alcohols and polyols	355.105	NA	8.45317	1	map00940 Phenylpropanoid biosynthesis; map00941 Flavonoid biosynthesis; map00945 Stilbenoid, diarylheptanoid and gingerol biosynthesis; map01110 Biosynthesis of secondary metabolites
8.85_658.4706m/z	8.50_417.3335m/z	2.58923	0.0168968	2.11735	NC30-D9:N2-D9	C17333	C17333	C27H44O3	M+H	38.2	6.63	-6.65835	92.1049	3beta-Hydroxy-5-cholestenoate; 3beta-Hydroxycholest-5-en-27-oic acid;	null	null	null	417.334	NA	8.49603	1	map00120 Primary bile acid biosynthesis
8.86_295.1569m/z	8.52_479.2113m/z	0.764163	0.0187319	1.13352	NC30-D9:N2-D9	C17429	C17429	C21H34O12	M+H	41.5	15.3	-2.19945	94.5914	Kanokoside B; Suspensolide F;	null	null	null	479.211	NA	8.52463	1	NULL
8.86_319.1688m/z	8.52_494.1775n	0.761336	0.0183274	1.00628	NC30-D9:N2-D9	C09783	C09783	C24H30O11	M+H-H2O, M+H	36.9	6.36	-2.67687	81.364	Harpagoside;	null	null	null	477.174	494.177	8.52463	1	NULL
8.88_224.1637m/z	8.54_486.2546m/z	0.791461	0.0187273	1.02501	NC30-D9:N2-D9	C12539	C12539	C27H42ClNO2	M+K	30.4	0	2.40752	54.9229	Benzethonium chloride;	null	null	null	486.255	NA	8.53907	1	NULL
8.88_295.2599m/z	8.54_511.3273m/z	1.44354	0.0244614	1.26811	NC30-D9:N2-D9	C15701	C15701	C24H39N5O6	M+NH4	37.6	16.1	6.93747	79.6479	Syringolin A;	null	null	null	511.327	NA	8.53907	1	NULL
8.88_312.1381n	8.54_523.1736m/z	0.674604	0.0345064	1.26919	NC30-D9:N2-D9	C08178	C08178	C25H33NaO8	M+K	36.5	0	6.50169	90.0092	Hydrocortisone sodium succinate;	null	null	null	523.174	NA	8.53907	1	NULL
8.89_422.2422n	8.55_265.1021m/z	0.772283	0.0272705	1.03146	NC30-D9:N2-D9	C14657	C14657	C21H14O	M+H-H2O	38.7	0	3.37406	97.6045	2,3-Diphenyl-1-indanone; 2,3-Diphenyl-1H-inden-1-one; 2,3-Diphenylindone;	null	null	null	265.102	NA	8.55357	1	NULL
8.89_489.1821m/z	8.55_448.1899n	0.720991	0.0168968	1.3124	NC30-D9:N2-D9	C10491	C10491	C27H28O6	M+Na, M+K	41.7	28.4	2.94992	83.3992	Lonchocarpenin;	null	null	null	471.179	448.19	8.55357	1	NULL
8.89_522.2077m/z	8.55_499.1748m/z	0.601779	0.0168968	1.55593	NC30-D9:N2-D9	C15429	C15429	C25H32O8	M+K	40.9	19.9	4.16626	89.6226	17,21-Dihydroxypregn-4-ene-3,11,20-trione 21-(hydrogensuccinate); 21-(3-Carboxy-1-oxopropoxy)-17-hydroxypregn-4-ene-3,11,20-trione; Cortisone 21-succinate;	null	null	null	499.175	NA	8.55357	1	NULL
8.91_434.2380n	8.59_310.2489n	0.767702	0.0168968	1.00144	NC30-D9:N2-D9	C14308	C14308	C19H34O3	M+H, M+K	37.2	0	-6.05891	92.9258	Methoprene; (E,E)-1-Methylethyl 11-methoxy-3,7,11-trimethyl-2,4-dodecadienoate;	null	null	null	311.256	310.249	8.58862	1	NULL
8.98_306.2489n	8.63_268.1129m/z	0.760411	0.0229653	1.15502	NC30-D9:N2-D9	C19221	C19221	C20H13N	M+H	35.9	0	3.10832	83.1691	7H-Dibenzo[c,g]carbazole;	null	null	null	268.113	NA	8.63158	1	NULL
8.98_483.2471m/z	8.65_494.1765n	0.746563	0.0174005	1.15359	NC30-D9:N2-D9	C09783	C09783	C24H30O11	M+H-H2O, M+H	33.4	4.77	-4.60445	67.4404	Harpagoside;	null	null	null	477.173	494.177	8.64605	1	NULL
9.00_497.1735m/z	8.65_523.1737m/z	0.645182	0.0486722	1.28258	NC30-D9:N2-D9	C08178	C08178	C25H33NaO8	M+K	36.8	0	6.647	91.4308	Hydrocortisone sodium succinate;	null	null	null	523.174	NA	8.64605	1	NULL
9.01_436.8063m/z	8.66_464.2377n	0.74602	0.0176608	1.16919	NC30-D9:N2-D9	C11134	C11134	C25H36O8	M+NH4, M+K, M+Na	38	20.9	-7.21966	77.5047	Testosterone glucuronide; Testosterone 17beta-(beta-D-glucuronide);	Lipids and lipid-like molecules	Steroids and steroid derivatives	Steroidal glycosides	482.271	464.238	8.66045	1	map00140 Steroid hormone biosynthesis
9.01_854.5829m/z	8.66_471.1795m/z	0.701021	0.0168968	1.15625	NC30-D9:N2-D9	C09111	C09111	C24H32O7	M+K	39.1	7.08	3.55088	92.5048	Inflexin; 3beta,11beta-Diacetoxy-1alpha-hydroxykaura-16-ene-6,15-dione;	null	null	null	471.179	NA	8.66045	1	NULL
9.01_898.6086m/z	8.73_497.1946m/z	0.716675	0.0168968	1.07249	NC30-D9:N2-D9	C08867	C08867	C26H34O7	M+K	39.6	29.5	2.12721	70.8846	Hellebrigenin 3-acetate;	null	null	null	497.195	NA	8.7325	1	NULL
9.03_274.1481m/z	8.73_497.1946m/z	0.716675	0.0168968	1.07249	NC30-D9:N2-D9	C16932	C16932	C26H34O7	M+K	39.6	29.5	2.12721	70.8846	Cinobufotalin;	null	null	null	497.195	NA	8.7325	1	NULL
9.03_319.2577m/z	8.79_240.0957m/z	0.72987	0.022916	1.18839	NC30-D9:N2-D9	C15532	C15532	C8H15N3O4	M+Na	35.5	0	0.907793	78.5187	N-Acetyl-L-citrulline;	null	null	null	240.096	NA	8.7901	1	map00220 Arginine biosynthesis; map01100 Metabolic pathways; map01230 Biosynthesis of amino acids
9.03_472.3003m/z	8.79_471.1562m/z	0.730878	0.0198569	1.19441	NC30-D9:N2-D9	C09726	C09726	C32H24O5	M+H-H2O	45.7	63.3	-5.88498	71.9446	Dracorubin;	null	null	null	471.156	NA	8.7901	1	NULL
9.03_489.1899m/z	8.83_404.2792m/z	0.746837	0.0168968	1.07757	NC30-D9:N2-D9	C16922	C16922	C24H34O4	M+NH4	36.9	33.5	-0.872226	51.8364	Bufalin;	null	null	null	404.279	NA	8.83357	1	NULL
9.04_278.2927n	8.83_426.2627m/z	0.73389	0.0261609	1.1198	NC30-D9:N2-D9	C11794	C11794	C26H35NO4	M+H	39.5	12.4	-2.89678	88.6489	Diprenorphine;	null	null	null	426.263	NA	8.83357	1	NULL
9.06_610.3680m/z	8.86_319.1688m/z	0.703072	0.0168968	1.32652	NC30-D9:N2-D9	C08162	C08162	C20H24O2	M+Na	36.2	0	6.55753	88.2667	Exemestane;	Lipids and lipid-like molecules	Steroids and steroid derivatives	Androstane steroids	319.169	NA	8.86217	1	NULL
9.09_240.0953m/z	8.86_319.1688m/z	0.703072	0.0168968	1.32652	NC30-D9:N2-D9	C19730	C19730	C20H24O2	M+Na	36.2	0	6.55753	88.2667	Crocetin dialdehyde; 8,8'-Diapocarotene-8,8'-dial;	null	null	null	319.169	NA	8.86217	1	map00999 Biosynthesis of secondary metabolites - unclassified; map01110 Biosynthesis of secondary metabolites
9.09_288.1426m/z	8.86_319.1688m/z	0.703072	0.0168968	1.32652	NC30-D9:N2-D9	C14391	C14391	C20H24O2	M+Na	36.2	0	6.55753	88.2667	Diethylstilbestrol dimethyl ether; (E)-1,1'-(1,2-Diethyl-1,2-ethenediyl)bis(4-methoxybenzene);	null	null	null	319.169	NA	8.86217	1	NULL
9.09_413.2865m/z	8.86_319.1688m/z	0.703072	0.0168968	1.32652	NC30-D9:N2-D9	C15063	C15063	C20H24O2	M+Na	36.2	0	6.55753	88.2667	3-Methoxy-D-homoestra-1,3,5(10),8,14-pentaen-17abeta-ol;	null	null	null	319.169	NA	8.86217	1	NULL
9.09_460.2492m/z	8.86_319.1688m/z	0.703072	0.0168968	1.32652	NC30-D9:N2-D9	C15124	C15124	C20H24O2	M+Na	36.2	0	6.55753	88.2667	3-Methoxy-D-homoestra-1,3,5(10),8-tetraen-17a-one;	null	null	null	319.169	NA	8.86217	1	NULL
9.09_491.1918m/z	8.86_319.1688m/z	0.703072	0.0168968	1.32652	NC30-D9:N2-D9	C07534	C07534	C20H24O2	M+Na	36.2	0	6.55753	88.2667	Ethynyl estradiol; 17alpha-Ethinyl estradiol; Ethinyl estradiol; Ethinylestradiol;	Lipids and lipid-like molecules	Steroids and steroid derivatives	Estrane steroids	319.169	NA	8.86217	1	NULL
9.10_489.2250m/z	8.88_224.1637m/z	0.734605	0.0203744	1.04907	NC30-D9:N2-D9	C10869	C10869	C13H23NO3	M+H-H2O	35.5	0	-3.5018	81.4934	Valeroidine;	null	null	null	224.164	NA	8.87652	1	NULL
9.12_460.2590n	8.88_312.1381n	0.727437	0.0168968	1.00249	NC30-D9:N2-D9	C09136	C09136	C19H20O4	M+H, M+NH4	36.5	0.0808	6.0982	89.3703	Montanin A;	null	null	null	330.169	312.138	8.87652	1	NULL
9.13_315.2273m/z	8.89_422.2422n	0.736021	0.0168968	1.29341	NC30-D9:N2-D9	C15061	C15061	C27H34O4	M+Na, M+K	34.8	10.5	-8.19715	72.7185	2,2-Dibutyl-3-(4-methoxyphenyl)-4-methyl-2H-1-benzopyran-7-ol acetate;	null	null	null	461.2	422.242	8.89092	1	NULL
9.13_319.1331m/z	8.89_489.1821m/z	0.716919	0.0168968	1.3132	NC30-D9:N2-D9	C19966	C19966	C18H32O15	M+H	33.6	9.71	1.41026	60.2084	beta-D-Glc-(1->4)-alpha-L-Rha-(1->3)-D-Glc; beta-D-Glcp-(1->4)-alpha-L-Rhap-(1->3)-D-Glcp;	null	null	null	489.182	NA	8.89092	1	NULL
9.13_321.1359m/z	8.89_522.2077m/z	0.696888	0.0168968	1.20411	NC30-D9:N2-D9	C07031	C07031	C23H29N7O6	M+Na	34.8	4.83	1.15732	70.605	N-Acetyl-O-demethylpuromycin;	null	null	null	522.208	NA	8.89092	1	map00231 Puromycin biosynthesis; map01130 Biosynthesis of antibiotics
9.13_323.1308m/z	8.98_483.2471m/z	0.75576	0.0168968	1.06025	NC30-D9:N2-D9	C20591	C20591	C27H40O5	M+K	35.1	3.86	-8.09667	80.6283	Fusaproliferin; (-)-Fusaproliferin;	null	null	null	483.247	NA	8.98458	1	NULL
9.22_443.2714m/z	9.00_497.1735m/z	0.704821	0.0168968	1.21406	NC30-D9:N2-D9	C09968	C09968	C25H30O9	M+Na	33.8	0	-9.83435	79.5306	Robustaol A;	null	null	null	497.174	NA	8.99917	1	NULL
9.22_534.2275m/z	9.01_854.5829m/z	0.758435	0.0321664	1.02066	NC30-D9:N2-D9	C13888	C13888	C43H81O13P	M+NH4	35.9	3.73	9.07479	85.7213	1-Hexadecanoyl-2-(9Z-octadecenoyl)-sn-glycero-3-phospho-1'-myo-inositol;	null	null	null	854.583	NA	9.01373	1	NULL
9.23_159.6095m/z	9.03_274.1481m/z	0.743936	0.0170576	1.18158	NC30-D9:N2-D9	C06975	C06975	C9H23NO3PS+	M+NH4	32.7	0	2.41745	66.2441	Echothiophate;	Organic nitrogen compounds	Organonitrogen compounds	Quaternary ammonium salts	274.148	NA	9.02827	1	NULL
9.28_450.3088m/z	9.03_472.3003m/z	0.762522	0.0303405	1.04578	NC30-D9:N2-D9	C05464	C05464	C26H43NO5	M+Na	33.1	0	-6.78661	73.3258	Glycodeoxycholate; Glycodeoxycholic acid; 3alpha,12alpha-Dihydroxy-5beta-cholan-24-oylglycine;	null	null	null	472.3	NA	9.02827	1	NULL
9.31_313.1677m/z	9.03_472.3003m/z	0.762522	0.0303405	1.04578	NC30-D9:N2-D9	C05466	C05466	C26H43NO5	M+Na	33.1	0	-6.78661	73.3258	Glycochenodeoxycholate; Glycochenodeoxycholic acid; Chenodeoxyglycocholate;	null	null	null	472.3	NA	9.02827	1	map00120 Primary bile acid biosynthesis; map00121 Secondary bile acid biosynthesis; map04976 Bile secretion; map04979 Cholesterol metabolism
9.31_331.1814n	9.03_489.1899m/z	0.719376	0.0394577	1.25813	NC30-D9:N2-D9	C17030	C17030	C24H34O8	M+K	32.5	8.22	3.08702	58.0086	Nigakilactone E;	null	null	null	489.19	NA	9.02827	1	NULL
9.31_340.2139m/z	9.09_240.0953m/z	0.766842	0.0168968	1.1188	NC30-D9:N2-D9	C15532	C15532	C8H15N3O4	M+Na	49.7	74	-0.653333	75.2733	N-Acetyl-L-citrulline;	null	null	null	240.095	NA	9.08678	1	map00220 Arginine biosynthesis; map01100 Metabolic pathways; map01230 Biosynthesis of amino acids
9.34_302.2233n	9.09_413.2865m/z	0.641205	0.0168968	1.05302	NC30-D9:N2-D9	C21768	C21768	C30H38O2	M+H-H2O	39.1	19.8	5.99473	82.5865	4,4'-Diapolycopen-4-oate;	null	null	null	413.286	NA	9.08678	1	NULL
9.36_359.1499m/z	9.09_460.2492m/z	0.779625	0.0215133	1.14639	NC30-D9:N2-D9	C15694	C15694	C26H39NO5S	M+H-H2O	40.5	27.1	-4.9895	80.9155	Epothilone C;	null	null	null	460.249	NA	9.08678	1	NULL
9.36_359.1851m/z	9.09_491.1918m/z	0.637549	0.0245741	1.39884	NC30-D9:N2-D9	C04070	C04070	C25H32O11	M+H-H2O	38.6	6.03	1.22121	88.3672	Gibberellin 2-O-beta-D-glucoside;	null	null	null	491.192	NA	9.08678	1	NULL
9.37_270.2781m/z	9.10_489.2250m/z	0.66721	0.0215676	1.27702	NC30-D9:N2-D9	C09697	C09697	C25H38O7	M+K	40.7	18	0.0973844	85.6297	Laserpitin;	null	null	null	489.225	NA	9.10195	1	NULL
9.37_271.2034m/z	9.12_460.2590n	0.688022	0.0179167	1.24311	NC30-D9:N2-D9	C08719	C08719	C30H36O4	M+Na, M+K	35.2	0.0364	-5.01927	81.9385	Sophoranone;	null	null	null	483.248	460.259	9.11667	1	NULL
9.37_293.2831n	9.13_315.2273m/z	0.679124	0.0168968	1.19522	NC30-D9:N2-D9	C11840	C11840	C16H27NO4	M+NH4	34.9	2.66	-1.80331	73.9994	N-(3-Oxododecanoyl)homoserine lactone;	null	null	null	315.227	NA	9.13117	1	NULL
9.39_362.2305m/z	9.13_315.2273m/z	0.679124	0.0168968	1.19522	NC30-D9:N2-D9	C21201	C21201	C16H27NO4	M+NH4	34.9	2.66	-1.80331	73.9994	N-3-Oxo-dodecanoyl-L-homoserine lactone; 3-Oxo-C12-HSL; 3-Oxo-N-[(3S)-tetrahydro-2-oxo-3-furanyl]-dodecanamide;	null	null	null	315.227	NA	9.13117	1	map02024 Quorum sensing; map02025 Biofilm formation - Pseudomonas aeruginosa
9.39_457.2896m/z	9.13_319.1331m/z	0.684346	0.0179777	1.17881	NC30-D9:N2-D9	C10285	C10285	C19H20O3	M+Na	37.3	0	9.00509	96.2894	4-Prenylresveratrol;	null	null	null	319.133	NA	9.13117	1	NULL
9.39_489.2272m/z	9.13_321.1359m/z	0.722035	0.0187273	1.02303	NC30-D9:N2-D9	C06163	C06163	C20H20NO4+	M+H-H2O	38.6	0	-0.153051	93.1781	(S)-cis-N-Methylstylopine;	null	null	null	321.136	NA	9.13117	1	map00950 Isoquinoline alkaloid biosynthesis; map01100 Metabolic pathways; map01110 Biosynthesis of secondary metabolites
9.39_500.3300m/z	9.13_321.1359m/z	0.722035	0.0187273	1.02303	NC30-D9:N2-D9	C01795	C01795	C20H20NO4+	M+H-H2O	38.6	0	-0.153051	93.1781	Columbamine;	null	null	null	321.136	NA	9.13117	1	map00950 Isoquinoline alkaloid biosynthesis; map01063 Biosynthesis of alkaloids derived from shikimate pathway; map01110 Biosynthesis of secondary metabolites
9.40_374.1693m/z	9.13_321.1359m/z	0.722035	0.0187273	1.02303	NC30-D9:N2-D9	C09553	C09553	C20H20NO4+	M+H-H2O	38.6	0	-0.153051	93.1781	Jatrorrhizine;	null	null	null	321.136	NA	9.13117	1	NULL
9.40_387.3051m/z	9.13_323.1308m/z	0.658117	0.0168968	1.21795	NC30-D9:N2-D9	C18403	C18403	C11H20N3O3PS	M+NH4	34.5	0	2.30074	75.4672	Pirimiphos-methyl; Pirimiphosmethyl;	null	null	null	323.131	NA	9.13117	1	NULL
9.40_434.2792n	9.22_443.2714m/z	0.722042	0.023368	1.00681	NC30-D9:N2-D9	C14212	C14212	C29H31NO2	M+NH4	37.9	4.72	4.86262	90.6053	Nafoxidine;	null	null	null	443.271	NA	9.21913	1	NULL
9.40_517.2235m/z	9.28_450.3088m/z	0.756964	0.0168968	1.1406	NC30-D9:N2-D9	C12552	C12552	C28H41N3O3	M+H-H2O	34	0	-5.83579	76.8955	Oxethazaine; Oxetacaine;	null	null	null	450.309	NA	9.28413	1	NULL
9.40_532.2754m/z	9.31_313.1677m/z	0.760023	0.018947	1.01323	NC30-D9:N2-D9	C07532	C07532	C17H26N2O	M+K	39.2	0	0.0284865	95.8697	Ropivacaine;	Organic acids and derivatives	Carboxylic acids and derivatives	Amino acids, peptides, and analogues	313.168	NA	9.31335	1	NULL
9.40_608.3837m/z	9.31_313.1677m/z	0.760023	0.018947	1.01323	NC30-D9:N2-D9	C09895	C09895	C17H26N2O	M+K	39.2	0	0.0284865	95.8697	Sauroxine;	null	null	null	313.168	NA	9.31335	1	NULL
9.42_288.2400n	9.31_313.1677m/z	0.760023	0.018947	1.01323	NC30-D9:N2-D9	C09889	C09889	C17H26N2O	M+K	39.2	0	0.0284865	95.8697	alpha-Obscurine;	null	null	null	313.168	NA	9.31335	1	NULL
9.42_678.3209m/z	9.31_331.1814n	0.745341	0.0168968	1.11971	NC30-D9:N2-D9	C18373	C18373	C19H25NO4	M+NH4, M+Na	36.1	4.69	9.07092	85.8064	Tetramethrin; Neo-pynamin; Phthalthrin;	null	null	null	354.194	331.181	9.31335	1	NULL
9.43_358.3280m/z	9.31_340.2139m/z	1.57229	0.0458306	1.53896	NC30-D9:N2-D9	C14752	C14752	C18H26O5	M+NH4	22.2	4.3	6.37336	13.8497	alpha-Zearalanol; Zeranol;	null	null	null	340.214	NA	9.31335	1	NULL
9.44_427.3867m/z	9.31_340.2139m/z	1.57229	0.0458306	1.53896	NC30-D9:N2-D9	C14753	C14753	C18H26O5	M+NH4	22.2	4.3	6.37336	13.8497	beta-Zearalanol; Taleranol;	null	null	null	340.214	NA	9.31335	1	NULL
9.49_181.6316m/z	9.34_302.2233n	1.81646	0.0498078	1.52889	NC30-D9:N2-D9	C07198	C07198	C20H30O2	M+NH4, M+K, M+Na, M+H, M+H-H2O	38.5	0.521	-4.1535	97.03	Methyltestosterone;	Lipids and lipid-like molecules	Steroids and steroid derivatives	Androstane steroids	303.231	302.223	9.34272	1	NULL
9.50_96.0573n	9.34_302.2233n	1.81646	0.0498078	1.52889	NC30-D9:N2-D9	C15188	C15188	C20H30O2	M+NH4, M+K, M+Na, M+H, M+H-H2O	38.5	0.521	-4.1535	97.03	19-Nor-5alpha-pregnane-3,20-dione;	null	null	null	303.231	302.223	9.34272	1	NULL
9.53_461.1121m/z	9.34_302.2233n	1.81646	0.0498078	1.52889	NC30-D9:N2-D9	C15460	C15460	C20H30O2	M+NH4, M+K, M+Na, M+H, M+H-H2O	38.5	0.521	-4.1535	97.03	17beta-Hydroxy-17-methyl-5alpha-androst-9(11)-en-3-one;	null	null	null	303.231	302.223	9.34272	1	NULL
9.53_476.1372n	9.34_302.2233n	1.81646	0.0498078	1.52889	NC30-D9:N2-D9	C15259	C15259	C20H30O2	M+NH4, M+K, M+Na, M+H, M+H-H2O	38.5	0.521	-4.1535	97.03	17beta-Hydroxy-2alpha,17-dimethylestr-4-en-3-one; 2alpha,17-Dimethyl-19-nortestosterone;	null	null	null	303.231	302.223	9.34272	1	NULL
9.53_483.1524m/z	9.34_302.2233n	1.81646	0.0498078	1.52889	NC30-D9:N2-D9	C15036	C15036	C20H30O2	M+NH4, M+K, M+Na, M+H, M+H-H2O	38.5	0.521	-4.1535	97.03	2alpha-Methyl-5alpha-androstane-3,17-dione;	null	null	null	303.231	302.223	9.34272	1	NULL
9.53_522.2027m/z	9.34_302.2233n	1.81646	0.0498078	1.52889	NC30-D9:N2-D9	C15412	C15412	C20H30O2	M+NH4, M+K, M+Na, M+H, M+H-H2O	38.5	0.521	-4.1535	97.03	17beta-Hydroxy-4-methylandrost-4-en-3-one; 4-Methyltestosterone;	null	null	null	303.231	302.223	9.34272	1	NULL
9.56_458.3223m/z	9.34_302.2233n	1.81646	0.0498078	1.52889	NC30-D9:N2-D9	C15318	C15318	C20H30O2	M+NH4, M+K, M+Na, M+H, M+H-H2O	38.5	0.521	-4.1535	97.03	17abeta-Hydroxy-D-homoandrost-4-en-3-one; D-Homotestosterone;	null	null	null	303.231	302.223	9.34272	1	NULL
9.56_550.3896m/z	9.34_302.2233n	1.81646	0.0498078	1.52889	NC30-D9:N2-D9	C15017	C15017	C20H30O2	M+NH4, M+K, M+Na, M+H, M+H-H2O	38.5	0.521	-4.1535	97.03	17beta-Hydroxy-5alpha-androst-2-ene-2-carboxaldehyde;	null	null	null	303.231	302.223	9.34272	1	NULL
9.59_536.2533m/z	9.34_302.2233n	1.81646	0.0498078	1.52889	NC30-D9:N2-D9	C14588	C14588	C20H30O2	M+NH4, M+K, M+Na, M+H, M+H-H2O	38.5	0.521	-4.1535	97.03	17beta-Hydroxy-7alpha-methylandrost-4-en-3-one; 7alpha-Methyltestosterone;	null	null	null	303.231	302.223	9.34272	1	NULL
9.61_257.2241m/z	9.34_302.2233n	1.81646	0.0498078	1.52889	NC30-D9:N2-D9	C15070	C15070	C20H30O2	M+NH4, M+K, M+Na, M+H, M+H-H2O	38.5	0.521	-4.1535	97.03	17beta-Hydroxy-1,17-dimethylestr-5(10)-en-3-one;	null	null	null	303.231	302.223	9.34272	1	NULL
9.63_436.3974m/z	9.34_302.2233n	1.81646	0.0498078	1.52889	NC30-D9:N2-D9	C14490	C14490	C20H30O2	M+NH4, M+K, M+Na, M+H, M+H-H2O	38.5	0.521	-4.1535	97.03	Stenbolone; 17beta-Hydroxy-2-methyl-5alpha-androst-1-en-3-one;	null	null	null	303.231	302.223	9.34272	1	NULL
9.63_559.0964m/z	9.34_302.2233n	1.81646	0.0498078	1.52889	NC30-D9:N2-D9	C15003	C15003	C20H30O2	M+NH4, M+K, M+Na, M+H, M+H-H2O	38.5	0.521	-4.1535	97.03	17-Hydroxy-19-nor-17alpha-pregn-5(10)-en-3-one;	null	null	null	303.231	302.223	9.34272	1	NULL
9.64_140.0679m/z	9.36_359.1499m/z	1.77277	0.041613	1.66877	NC30-D9:N2-D9	C08747	C08747	C20H24O7	M+H-H2O	39.8	8.06	2.72139	94.2604	Ailanthone;	null	null	null	359.15	NA	9.35712	1	NULL
9.64_352.0890m/z	9.36_359.1851m/z	1.67484	0.0384876	1.56592	NC30-D9:N2-D9	C07370	C07370	C21H26O5	M+H	42.2	19.1	-0.66299	92.7351	Prednisone;	Lipids and lipid-like molecules	Steroids and steroid derivatives	Hydroxysteroids	359.185	NA	9.35712	1	NULL
9.67_437.1380m/z	9.37_270.2781m/z	0.627068	0.0208246	1.28629	NC30-D9:N2-D9	C17515	C17515	C17H35NO	M+H	38.8	0	-3.7994	98.5678	Capsi-amide; N-(13-Methyltetradecyl)acetamide; CAP-A;	Organic acids and derivatives	Carboxylic acids and derivatives	Carboxylic acid derivatives	270.278	NA	9.3716	1	NULL
9.69_354.0604n	9.37_271.2034m/z	0.674572	0.0183142	1.04062	NC30-D9:N2-D9	C00370	C00370	C17H28O	M+Na	38.1	0	0.667294	91.2268	Sterol;	Lipids and lipid-like molecules	Steroids and steroid derivatives	Hydroxysteroids	271.203	NA	9.3716	1	NULL
9.69_373.0406m/z	9.37_271.2034m/z	0.674572	0.0183142	1.04062	NC30-D9:N2-D9	C16343	C16343	C17H28O	M+Na	38.1	0	0.667294	91.2268	Heptadecatrienal; (8Z,11Z,14Z)-8,11,14-Heptadecatrienal;	null	null	null	271.203	NA	9.3716	1	map00592 alpha-Linolenic acid metabolism
9.69_533.3995n	9.39_362.2305m/z	0.680212	0.0321188	1.05663	NC30-D9:N2-D9	C15208	C15208	C21H28O4	M+NH4	37.9	0	-6.11051	96.5341	Bisphenol A bis(2-hydroxypropyl) ether; Bisphenol A propoxylate; 2,2-Bis[4-(2-hydroxy-2-methylethoxy)phenyl]propane;	null	null	null	362.23	NA	9.38603	1	NULL
9.70_344.2668m/z	9.39_362.2305m/z	0.680212	0.0321188	1.05663	NC30-D9:N2-D9	C15135	C15135	C21H28O4	M+NH4	37.9	0	-6.11051	96.5341	3beta-Hydroxy-17-oxoandrost-5-en-19-al acetate;	null	null	null	362.23	NA	9.38603	1	NULL
9.70_419.1693m/z	9.39_362.2305m/z	0.680212	0.0321188	1.05663	NC30-D9:N2-D9	C14478	C14478	C21H28O4	M+NH4	37.9	0	-6.11051	96.5341	21-Deoxycortisone; 17alpha-Hydroxypregn-4-ene-3,11,20-trione;	null	null	null	362.23	NA	9.38603	1	NULL
9.70_428.1742m/z	9.39_362.2305m/z	0.680212	0.0321188	1.05663	NC30-D9:N2-D9	C05490	C05490	C21H28O4	M+NH4	37.9	0	-6.11051	96.5341	11-Dehydrocorticosterone;	null	null	null	362.23	NA	9.38603	1	map00140 Steroid hormone biosynthesis
9.70_718.2479m/z	9.39_457.2896m/z	0.749195	0.0179167	1.02456	NC30-D9:N2-D9	C06733	C06733	C30H42O	M+K	38.3	12.3	6.83882	86.7066	8'-apo-beta-Carotenol;	null	null	null	457.29	NA	9.38603	1	NULL
9.75_637.3206n	9.39_489.2272m/z	0.687574	0.0198175	1.28676	NC30-D9:N2-D9	C09697	C09697	C25H38O7	M+K	32.1	9.47	5.07755	56.8035	Laserpitin;	null	null	null	489.227	NA	9.38603	1	NULL
9.75_692.2483m/z	9.40_374.1693m/z	0.621251	0.0405753	1.50954	NC30-D9:N2-D9	C15619	C15619	C22H25NO3	M+Na	40	16.6	-9.67492	93.9572	Am 580;	null	null	null	374.169	NA	9.40063	1	NULL
9.78_250.2282n	9.40_374.1693m/z	0.621251	0.0405753	1.50954	NC30-D9:N2-D9	C12864	C12864	C22H25NO3	M+Na	40	16.6	-9.67492	93.9572	Tamibarotene; Am 80;	Benzenoids	Tetralins	null	374.169	NA	9.40063	1	NULL
9.78_323.1620m/z	9.40_517.2235m/z	0.696055	0.0221003	1.277	NC30-D9:N2-D9	C09969	C09969	C31H34O8	M+H-H2O	34.1	3.34	2.68581	70.1815	Sarothralin;	null	null	null	517.224	NA	9.40063	1	NULL
9.82_442.3957m/z	9.40_532.2754m/z	0.697093	0.0174005	1.14585	NC30-D9:N2-D9	C07710	C07710	C33H30N4O2	M+NH4	34	0	9.158	80.184	Telmisartan;	Benzenoids	Benzene and substituted derivatives	Biphenyls and derivatives	532.275	NA	9.40063	1	NULL
9.82_528.1877m/z	9.50_96.0573n	4.03039	0.0266496	2.0271	NC30-D9:N2-D9	C02395	C02395	C6H8O	M+H, M+NH4	40.4	10.4	-1.82892	93.8218	Cyclohex-2-enone; 2-Cyclohexen-1-one;	null	null	null	114.091	96.0573	9.50365	1	NULL
9.82_569.1897m/z	9.53_461.1121m/z	0.597113	0.0454243	1.12064	NC30-D9:N2-D9	C06571	C06571	C22H23ClN2O8	M+H-H2O	32	0	2.18679	62.461	Chlortetracycline; 7-Chlorotetracycline; Aureomycin;	null	null	null	461.112	NA	9.5328	1	map00253 Tetracycline biosynthesis; map01057 Biosynthesis of type II polyketide products; map01130 Biosynthesis of antibiotics
9.82_668.5048m/z	9.53_483.1524m/z	0.624413	0.024368	1.02466	NC30-D9:N2-D9	C17350	C17350	C23H24N4O9	M+H-H2O	35.4	0	2.76312	80.0841	Nocardicin B;	null	null	null	483.152	NA	9.5328	1	NULL
9.84_271.2387m/z	9.53_483.1524m/z	0.624413	0.024368	1.02466	NC30-D9:N2-D9	C01941	C01941	C23H24N4O9	M+H-H2O	35.4	0	2.76312	80.0841	Nocardicin A;	null	null	null	483.152	NA	9.5328	1	map00261 Monobactam biosynthesis; map01130 Biosynthesis of antibiotics; map07012 Cephalosporins - parenteral agents
9.84_351.0881m/z	9.53_483.1524m/z	0.624413	0.024368	1.02466	NC30-D9:N2-D9	C00927	C00927	C23H24N4O9	M+H-H2O	35.4	0	2.76312	80.0841	Isonocardicin A; 1-Azetidineacetic acid;	null	null	null	483.152	NA	9.5328	1	map00261 Monobactam biosynthesis; map01130 Biosynthesis of antibiotics
9.84_396.3445m/z	9.53_522.2027m/z	0.595032	0.0249105	1.22952	NC30-D9:N2-D9	C03848	C03848	C18H32O16	M+NH4	31.5	0	-0.288109	57.6188	6F-alpha-D-Galactosylsucrose; Planteose;	null	null	null	522.203	NA	9.5328	1	NULL
9.84_499.3541m/z	9.53_522.2027m/z	0.595032	0.0249105	1.22952	NC30-D9:N2-D9	C21454	C21454	C18H32O16	M+NH4	31.5	0	-0.288109	57.6188	beta-1,2-Mannotriose; beta-D-Mannopyranosyl-(1->2)-beta-D-mannopyranosyl-(1->2)-D-mannopyranose;	null	null	null	522.203	NA	9.5328	1	NULL
9.84_649.4377n	9.53_522.2027m/z	0.595032	0.0249105	1.22952	NC30-D9:N2-D9	C00492	C00492	C18H32O16	M+NH4	31.5	0	-0.288109	57.6188	Raffinose; Melitose; Melitriose; Gossypose; 6G-alpha-D-galactosylsucrose;	null	null	null	522.203	NA	9.5328	1	map00052 Galactose metabolism; map02010 ABC transporters
9.84_717.5827n	9.53_522.2027m/z	0.595032	0.0249105	1.22952	NC30-D9:N2-D9	C01835	C01835	C18H32O16	M+NH4	31.5	0	-0.288109	57.6188	Maltotriose; Amylotriose;	null	null	null	522.203	NA	9.5328	1	map02010 ABC transporters; map04973 Carbohydrate digestion and absorption
9.88_358.2765m/z	9.53_522.2027m/z	0.595032	0.0249105	1.22952	NC30-D9:N2-D9	C03367	C03367	C18H32O16	M+NH4	31.5	0	-0.288109	57.6188	6-alpha-Maltosylglucose;	null	null	null	522.203	NA	9.5328	1	NULL
9.88_571.5816n	9.53_522.2027m/z	0.595032	0.0249105	1.22952	NC30-D9:N2-D9	C08239	C08239	C18H32O16	M+NH4	31.5	0	-0.288109	57.6188	Gentianose; beta-D-Fructofuranosyl O-beta-D-glucopyranosyl-(1-6)-alpha-D-glucopyranoside;	null	null	null	522.203	NA	9.5328	1	NULL
9.91_478.1733m/z	9.53_522.2027m/z	0.595032	0.0249105	1.22952	NC30-D9:N2-D9	C06219	C06219	C18H32O16	M+NH4	31.5	0	-0.288109	57.6188	Cellotriose;	null	null	null	522.203	NA	9.5328	1	NULL
9.93_387.0961m/z	9.53_522.2027m/z	0.595032	0.0249105	1.22952	NC30-D9:N2-D9	C00883	C00883	C18H32O16	M+NH4	31.5	0	-0.288109	57.6188	Galactomannan; Galactomannoglycan;	null	null	null	522.203	NA	9.5328	1	NULL
9.94_233.1501m/z	9.53_522.2027m/z	0.595032	0.0249105	1.22952	NC30-D9:N2-D9	C08251	C08251	C18H32O16	M+NH4	31.5	0	-0.288109	57.6188	Umbelliferose; beta-D-Fructofuranosyl 2-O-alpha-D-galactopyranosyl-beta-D-glucopyranoside;	null	null	null	522.203	NA	9.5328	1	NULL
9.94_239.1780m/z	9.53_522.2027m/z	0.595032	0.0249105	1.22952	NC30-D9:N2-D9	C02160	C02160	C18H32O16	M+NH4	31.5	0	-0.288109	57.6188	Isomaltotriose;	null	null	null	522.203	NA	9.5328	1	map02010 ABC transporters
9.94_297.0438m/z	9.53_522.2027m/z	0.595032	0.0249105	1.22952	NC30-D9:N2-D9	C08243	C08243	C18H32O16	M+NH4	31.5	0	-0.288109	57.6188	Melezitose;	Organic oxygen compounds	Organooxygen compounds	Carbohydrates and carbohydrate conjugates	522.203	NA	9.5328	1	NULL
9.94_309.2765m/z	9.53_522.2027m/z	0.595032	0.0249105	1.22952	NC30-D9:N2-D9	C05404	C05404	C18H32O16	M+NH4	31.5	0	-0.288109	57.6188	D-Gal alpha 1->6D-Gal alpha 1->6D-Glucose; D-Gal-alpha1->6D-Gal-alpha1->6D-Glucose; Manninotriose;	Organic oxygen compounds	Organooxygen compounds	Carbohydrates and carbohydrate conjugates	522.203	NA	9.5328	1	map00052 Galactose metabolism
9.94_884.7018n	9.53_522.2027m/z	0.595032	0.0249105	1.22952	NC30-D9:N2-D9	C03661	C03661	C18H32O16	M+NH4	31.5	0	-0.288109	57.6188	1F-beta-D-Fructosylsucrose; beta-D-Fructofuranosyl-(2->1)-beta-D-fructofuranosyl alpha-D-glucopyranoside;	Organic oxygen compounds	Organooxygen compounds	Carbohydrates and carbohydrate conjugates	522.203	NA	9.5328	1	NULL
9.96_345.1723m/z	9.53_522.2027m/z	0.595032	0.0249105	1.22952	NC30-D9:N2-D9	C00713	C00713	C18H32O16	M+NH4	31.5	0	-0.288109	57.6188	Panose;	null	null	null	522.203	NA	9.5328	1	NULL
9.96_640.3818n	9.59_536.2533m/z	0.589525	0.0309829	1.7445	NC30-D9:N2-D9	C16543	C16543	C28H30N4O6	M+NH4	32.8	0	5.73281	70.6911	NPC;	Alkaloids and derivatives	Camptothecins	null	536.253	NA	9.59113	1	map00983 Drug metabolism - other enzymes
9.97_368.3301m/z	9.61_257.2241m/z	0.636042	0.0254244	1.02081	NC30-D9:N2-D9	C15298	C15298	C19H30O	M+H-H2O	37.3	0	-8.38625	95.6535	5alpha-Androstan-2-en-17beta-ol; 17beta-Hydroxy-5alpha-androst-2-ene;	null	null	null	257.224	NA	9.60547	1	NULL
9.98_425.3857n	9.61_257.2241m/z	0.636042	0.0254244	1.02081	NC30-D9:N2-D9	C03836	C03836	C19H30O	M+H-H2O	37.3	0	-8.38625	95.6535	3beta-Hydroxy-Delta5-steroid;	null	null	null	257.224	NA	9.60547	1	NULL
9.99_293.2422m/z	9.61_257.2241m/z	0.636042	0.0254244	1.02081	NC30-D9:N2-D9	C01881	C01881	C19H30O	M+H-H2O	37.3	0	-8.38625	95.6535	7-Oxosteroid;	null	null	null	257.224	NA	9.60547	1	NULL
	9.61_257.2241m/z	0.636042	0.0254244	1.02081	NC30-D9:N2-D9	C02940	C02940	C19H30O	M+H-H2O	37.3	0	-8.38625	95.6535	3-Oxo-5alpha-steroid;	null	null	null	257.224	NA	9.60547	1	NULL
	9.61_257.2241m/z	0.636042	0.0254244	1.02081	NC30-D9:N2-D9	C02797	C02797	C19H30O	M+H-H2O	37.3	0	-8.38625	95.6535	3-Oxo-5beta-steroid;	null	null	null	257.224	NA	9.60547	1	NULL
	9.61_257.2241m/z	0.636042	0.0254244	1.02081	NC30-D9:N2-D9	C01876	C01876	C19H30O	M+H-H2O	37.3	0	-8.38625	95.6535	3-Oxosteroid;	null	null	null	257.224	NA	9.60547	1	NULL
	9.63_559.0964m/z	0.526596	0.041328	1.47843	NC30-D9:N2-D9	C13050	C13050	C15H21N5O13P2	M+NH4	37.2	0.176	2.6259	88.8752	Cyclic ADP-ribose; cADPR;	null	null	null	559.096	NA	9.62667	1	map04020 Calcium signaling pathway; map04921 Oxytocin signaling pathway; map04970 Salivary secretion; map04972 Pancreatic secretion
	9.64_140.0679m/z	0.699798	0.0271455	1.12108	NC30-D9:N2-D9	C00719	C00719	C5H11NO2	M+Na	36.5	0	-2.73106	85.7742	Betaine; Trimethylaminoacetate; Glycine betaine; N,N,N-Trimethylglycine; Trimethylammonioacetate;	Organic acids and derivatives	Carboxylic acids and derivatives	Amino acids, peptides, and analogues	140.068	NA	9.64162	1	map00260 Glycine, serine and threonine metabolism; map01100 Metabolic pathways; map02010 ABC transporters
	9.64_140.0679m/z	0.699798	0.0271455	1.12108	NC30-D9:N2-D9	C00431	C00431	C5H11NO2	M+Na	36.5	0	-2.73106	85.7742	5-Aminopentanoate; 5-Aminopentanoic acid; 5-Aminovaleric acid;	Organic acids and derivatives	Carboxylic acids and derivatives	Amino acids, peptides, and analogues	140.068	NA	9.64162	1	map00310 Lysine degradation; map00330 Arginine and proline metabolism; map01120 Microbial metabolism in diverse environments
	9.64_140.0679m/z	0.699798	0.0271455	1.12108	NC30-D9:N2-D9	C16436	C16436	C5H11NO2	M+Na	36.5	0	-2.73106	85.7742	Valine;	null	null	null	140.068	NA	9.64162	1	NULL
	9.64_140.0679m/z	0.699798	0.0271455	1.12108	NC30-D9:N2-D9	C07457	C07457	C5H11NO2	M+Na	36.5	0	-2.73106	85.7742	Amyl nitrite; Isoamyl nitrite;	Organic nitrogen compounds	Organonitrogen compounds	Organic nitroso compounds	140.068	NA	9.64162	1	NULL
	9.64_140.0679m/z	0.699798	0.0271455	1.12108	NC30-D9:N2-D9	C01799	C01799	C5H11NO2	M+Na	36.5	0	-2.73106	85.7742	D-Norvaline; D-2-Aminovaleric acid; D-2-Aminopentanoic acid;	Organic acids and derivatives	Carboxylic acids and derivatives	Amino acids, peptides, and analogues	140.068	NA	9.64162	1	NULL
	9.64_140.0679m/z	0.699798	0.0271455	1.12108	NC30-D9:N2-D9	C06417	C06417	C5H11NO2	M+Na	36.5	0	-2.73106	85.7742	D-Valine; (R)-2-Amino-3-methylbutyric acid;	null	null	null	140.068	NA	9.64162	1	NULL
	9.64_140.0679m/z	0.699798	0.0271455	1.12108	NC30-D9:N2-D9	C03571	C03571	C5H11NO2	M+Na	36.5	0	-2.73106	85.7742	2-Amino-2-methylbutanoate;	null	null	null	140.068	NA	9.64162	1	NULL
	9.64_140.0679m/z	0.699798	0.0271455	1.12108	NC30-D9:N2-D9	C15987	C15987	C5H11NO2	M+Na	36.5	0	-2.73106	85.7742	4-Methylaminobutyrate; gamma-N-Methylaminobutyrate;	null	null	null	140.068	NA	9.64162	1	map00760 Nicotinate and nicotinamide metabolism; map01120 Microbial metabolism in diverse environments
	9.64_140.0679m/z	0.699798	0.0271455	1.12108	NC30-D9:N2-D9	C01826	C01826	C5H11NO2	M+Na	36.5	0	-2.73106	85.7742	L-Norvaline; L-2-Aminovaleric acid; L-2-Aminopentanoic acid; (S)-2-Aminopentanoic acid;	null	null	null	140.068	NA	9.64162	1	NULL
	9.64_140.0679m/z	0.699798	0.0271455	1.12108	NC30-D9:N2-D9	C00183	C00183	C5H11NO2	M+Na	36.5	0	-2.73106	85.7742	L-Valine; 2-Amino-3-methylbutyric acid;	Organic acids and derivatives	Carboxylic acids and derivatives	Amino acids, peptides, and analogues	140.068	NA	9.64162	1	map00280 Valine, leucine and isoleucine degradation; map00290 Valine, leucine and isoleucine biosynthesis; map00311 Penicillin and cephalosporin biosynthesis; map00460 Cyanoamino acid metabolism; map00770 Pantothenate and CoA biosynthesis; map00966 Glucosinolate biosynthesis; map00970 Aminoacyl-tRNA biosynthesis; map01060 Biosynthesis of plant secondary metabolites; map01063 Biosynthesis of alkal…
	9.64_352.0890m/z	0.566262	0.0474748	1.44231	NC30-D9:N2-D9	C00455	C00455	C11H15N2O8P	M+NH4	32.5	0	-4.26789	67.4971	Nicotinamide D-ribonucleotide; NMN; Nicotinamide mononucleotide; Nicotinamide ribonucleotide; Nicotinamide nucleotide; beta-Nicotinamide D-ribonucleotide; beta-Nicotinamide ribonucleotide; beta-Nicotinamide mononucleotide;	Nucleosides, nucleotides, and analogues	Pyridine nucleotides	Nicotinamide nucleotides	352.089	NA	9.64162	1	map00760 Nicotinate and nicotinamide metabolism; map01100 Metabolic pathways
	9.67_437.1380m/z	0.625129	0.0226926	1.07898	NC30-D9:N2-D9	C10617	C10617	C20H26N2O8S	M+H-H2O	37.9	7.9	0.718316	82.5696	Sirodesmin H;	null	null	null	437.138	NA	9.67127	1	NULL
	9.69_354.0604n	0.664181	0.0179777	1.12468	NC30-D9:N2-D9	C02927	C02927	C15H14O10	M+H, M+NH4	33	0.0996	4.67023	70.1657	2-Caffeoylisocitrate; (E)-Caffeoylisocitrate;	null	null	null	355.068	354.06	9.6864	1	NULL
	9.69_373.0406m/z	0.698067	0.0206238	1.01541	NC30-D9:N2-D9	C08429	C08429	C11H15N2O9P	M+Na	39.8	2.5	-0.366207	96.7958	Clitidine 5'-phosphate; 1,4-Dihydro-4-imino-1-(5-O-phosphono-beta-D-ribofuranosyl)-3-pyridinecarboxylic acid;	null	null	null	373.041	NA	9.6864	1	NULL
	9.70_344.2668m/z	0.688569	0.0168968	1.27682	NC30-D9:N2-D9	C15033	C15033	C21H30N2O	M+NH4	33.7	0	-8.6839	78.2461	Hydroxystenozole; 17alpha-Methyl-2'H-androsta-2,4-dieno[3,2-c]pyrazol-17beta-ol;	null	null	null	344.267	NA	9.70135	1	NULL
	9.70_419.1693m/z	0.601157	0.033502	1.08966	NC30-D9:N2-D9	C09493	C09493	C22H26O8	M+H	37.3	5.66	-1.67963	83.0013	Liatrin;	null	null	null	419.169	NA	9.70135	1	NULL
	9.70_428.1742m/z	0.628259	0.0249666	1.07293	NC30-D9:N2-D9	C10464	C10464	C23H22O7	M+NH4	33.6	1.75	9.42556	76.8236	12a-Hydroxyrotenone;	Phenylpropanoids and polyketides	Isoflavonoids	Isoflavans	428.174	NA	9.70135	1	NULL
	9.70_428.1742m/z	0.628259	0.0249666	1.07293	NC30-D9:N2-D9	C10532	C10532	C23H22O7	M+NH4	33.6	1.75	9.42556	76.8236	Sumatrol;	null	null	null	428.174	NA	9.70135	1	NULL
	9.75_692.2483m/z	0.288807	0.0168968	2.04127	NC30-D9:N2-D9	C14722	C14722	C35H43NO11	M+K	34.4	0.128	2.31115	74.6774	Rifamycin W-hemiacetal;	null	null	null	692.248	NA	9.74635	1	map01051 Biosynthesis of ansamycins; map01130 Biosynthesis of antibiotics
	9.78_250.2282n	0.770301	0.0242105	1.10902	NC30-D9:N2-D9	C15464	C15464	C17H30O	M+H-H2O, M+H	38.2	0	-5.95912	97.7501	(+)-12-(2-Cyclopenten-1-yl)-2-dodecanone;	null	null	null	251.235	250.228	9.77742	1	NULL
	9.78_323.1620m/z	0.79494	0.0359005	1.03949	NC30-D9:N2-D9	C18510	C18510	C19H24O3	M+Na	39.1	0.917	0.889171	95.6307	Prallethrin;	null	null	null	323.162	NA	9.77742	1	NULL
	9.82_528.1877m/z	0.56389	0.0168968	1.14309	NC30-D9:N2-D9	C01907	C01907	C27H29NO10	M+H	32.7	0	2.51222	66.7104	Daunorubicin; Daunomycin; (+)-Daunomycin;	Phenylpropanoids and polyketides	Anthracyclines	null	528.188	NA	9.82295	1	map01057 Biosynthesis of type II polyketide products; map01130 Biosynthesis of antibiotics
	9.82_569.1897m/z	0.588981	0.0230578	1.06438	NC30-D9:N2-D9	C03470	C03470	C27H34N2O9	M+K	35.5	1.35	0.235197	76.5324	3-alpha(S)-Strictosidine; Strictosidine;	null	null	null	569.19	NA	9.82295	1	map00901 Indole alkaloid biosynthesis; map01060 Biosynthesis of plant secondary metabolites; map01063 Biosynthesis of alkaloids derived from shikimate pathway; map01100 Metabolic pathways; map01110 Biosynthesis of secondary metabolites
	9.84_351.0881m/z	0.653341	0.0340852	1.2533	NC30-D9:N2-D9	C10194	C10194	C20H16O7	M+H-H2O	38.9	7.01	4.78749	93.1878	Velloquercetin;	null	null	null	351.088	NA	9.83827	1	NULL
	9.84_499.3541m/z	0.739001	0.0179167	1.06553	NC30-D9:N2-D9	C20715	C20715	C30H52O3	M+K	34.1	1.38	-1.56257	71.1816	Protopanaxadiol; Dammar-24-ene-3beta,12beta,20-triol; (20S)-Protopanaxadiol;	null	null	null	499.354	NA	9.83827	1	NULL
	9.88_358.2765m/z	0.726711	0.0229508	1.06845	NC30-D9:N2-D9	C14883	C14883	C20H33FO3	M+NH4	35.8	0	3.74149	83.4014	(3beta,5alpha,11beta,17beta)-9-Fluoro-17-methylandrostane-3,11,17-triol; 9-Fluoro-17alpha-methyl-5alpha-androstane-3beta,11beta,17-triol;	null	null	null	358.276	NA	9.88332	1	NULL
	9.88_358.2765m/z	0.726711	0.0229508	1.06845	NC30-D9:N2-D9	C14616	C14616	C20H33FO3	M+NH4	35.8	0	3.74149	83.4014	(3alpha,5beta,11beta,17beta)-9-Fluoro-17-methylandrostane-3,11,17-triol; 9alpha-Fluoro-17alpha-methyl-5beta-androstane-3alpha,11beta,17-triol;	null	null	null	358.276	NA	9.88332	1	NULL
	9.91_478.1733m/z	0.591687	0.0450512	1.16001	NC30-D9:N2-D9	C11737	C11737	C24H23N5O6	M+H	32.7	0	2.50044	66.2268	CB3717;	null	null	null	478.173	NA	9.91307	1	NULL
	9.93_387.0961m/z	0.636877	0.0456232	1.18349	NC30-D9:N2-D9	C17939	C17939	C20H16N2O5	M+Na	39.6	8.5	2.71714	92.6268	10-Hydroxycamptothecin;	null	null	null	387.096	NA	9.92827	1	NULL
	9.94_233.1501m/z	0.700223	0.0250003	1.00257	NC30-D9:N2-D9	C12027	C12027	C10H17NO4	M+NH4	30.1	8.13	2.20457	45.1709	2-Amino-9,10-epoxy-8-oxodecanoic acid;	null	null	null	233.15	NA	9.94335	1	NULL
	9.94_239.1780m/z	0.65049	0.0335655	1.15833	NC30-D9:N2-D9	C14239	C14239	C18H24O	M+H-H2O	39.4	25	-5.49302	78.1749	3-Deoxyestradiol; 3-Deoxy-17beta-estradiol;	null	null	null	239.178	NA	9.94335	1	NULL
	9.94_297.0438m/z	0.691636	0.0278231	1.00333	NC30-D9:N2-D9	C06921	C06921	C16H11ClN2O3	M+H-H2O	39.8	36	4.09697	67.7115	Clorazepate; Clorazepic acid;	Organoheterocyclic compounds	Benzodiazepines	1,4-benzodiazepines	297.044	NA	9.94335	1	NULL
	9.94_309.2765m/z	0.697922	0.0168968	1.11801	NC30-D9:N2-D9	C09183	C09183	C20H36O2	M+H	35	0.627	-7.41213	82.5126	Sclareol; (13R)-Labd-14-ene-8alpha,13-diol;	null	null	null	309.277	NA	9.94335	1	map00904 Diterpenoid biosynthesis; map01110 Biosynthesis of secondary metabolites
	9.96_345.1723m/z	0.76312	0.0443127	1.03846	NC30-D9:N2-D9	C09442	C09442	C20H26O6	M+H-H2O	39.7	12.7	7.37015	94.2169	Eupatoriopicrin;	null	null	null	345.172	NA	9.95875	1	NULL
