# Supplementary material for: The whole transcriptome regulation as a function of mitochondrial polymorphisms and aging in Caenorhabditis elegans
Source: Aging (Albany NY). 2020 Feb 4;12(3):2453–70. doi: 10.18632/aging.102754 (PMC7041728; doi:10.18632/aging.102754)
Supplement: Supplementary Table 7 [file aging-12-102754-s009..xlsx]

## Sheet: Sheet1
	Gene ID/metabolites	7.23_149.0956m/z	7.23_281.1353m/z	7.23_421.2179m/z	0.69_228.0485m/z	4.06_178.1325m/z	0.59_106.0863m/z	4.78_1032.4822m/z	3.63_533.1823n	9.01_436.8063m/z	11.16_593.1518m/z	11.16_578.2124m/z	6.43_252.1560m/z	8.70_286.2378m/z	9.01_854.5829m/z	10.35_758.1974n	9.40_608.3837m/z	10.10_496.1617m/z	12.63_938.2594m/z	11.33_1110.2824n	0.56_226.0378m/z	8.88_295.2599m/z	9.63_559.0964m/z	10.38_628.4918n	9.43_358.3280m/z	9.94_239.1780m/z	9.91_478.1733m/z	10.24_371.5127m/z	11.25_387.0568m/z	11.36_632.2076n	12.05_804.3459m/z	8.66_827.4395m/z	9.53_476.1372n	9.84_351.0881m/z	12.88_406.1060m/z	10.24_114.0679n	9.93_387.0961m/z	11.36_315.0183m/z	9.53_461.1121m/z	9.63_436.3974m/z	11.36_297.0436m/z	6.50_229.1781m/z	6.90_302.2672m/z	9.40_532.2754m/z	10.73_582.2771m/z	11.74_920.2519n	4.63_302.2052m/z	3.69_298.1124m/z	4.29_435.1817m/z
	181548	-0.75296	-0.688674	-0.711939	-0.917429	-0.798468	-0.736346	-0.760566	-0.803654	-0.840749	-0.842511	-0.916065	-0.941541	-0.865428	-0.900672	-0.77386	-0.765277	-0.799561	-0.810551	-0.85966	-0.835339	-0.854563	-0.848735	-0.812647	-0.78552	-0.693537	-0.759856	-0.72687	-0.726149	-0.741328	-0.72439	-0.714626	-0.698521	-0.687983	-0.713434	-0.703176	-0.70716	-0.675279	-0.679318	-0.66887	-0.727469	-0.740583	-0.741398	-0.761626	-0.752647	-0.73222	0.0125761	-0.0153474	-0.0301482
	189943	-0.597946	-0.505582	-0.533542	-0.872897	-0.711458	-0.624397	-0.672197	-0.746877	-0.831662	-0.948626	-0.985526	-0.980302	-0.959676	-0.962615	-0.861536	-0.852033	-0.851183	-0.858493	-0.914085	-0.916733	-0.920732	-0.925143	-0.903315	-0.899781	-0.849446	-0.889589	-0.867389	-0.869581	-0.872321	-0.858259	-0.851729	-0.837492	-0.831495	-0.847102	-0.842854	-0.844539	-0.826457	-0.824433	-0.816288	-0.843744	-0.85679	-0.857184	-0.866986	-0.871626	-0.857793	0.0122445	-0.0263281	-0.0410821
	189945	-0.582114	-0.490415	-0.518678	-0.861043	-0.694709	-0.606187	-0.654419	-0.730582	-0.818192	-0.952623	-0.98561	-0.976119	-0.959955	-0.958505	-0.85416	-0.844209	-0.84073	-0.848076	-0.906354	-0.911344	-0.914199	-0.919753	-0.898149	-0.897511	-0.854815	-0.889512	-0.867917	-0.871232	-0.871093	-0.856629	-0.850297	-0.835556	-0.830065	-0.844772	-0.841364	-0.842718	-0.82634	-0.822907	-0.814753	-0.83872	-0.852345	-0.852702	-0.861671	-0.868325	-0.854732	-0.00969766	-0.0486325	-0.063352
	178716	-0.602691	-0.487815	-0.514944	-0.907862	-0.769756	-0.682519	-0.741317	-0.821548	-0.910563	-0.94078	-0.98579	-0.998651	-0.977867	-0.998441	-0.952869	-0.947447	-0.945535	-0.949375	-0.981333	-0.981608	-0.984967	-0.985876	-0.973658	-0.960263	-0.870708	-0.941212	-0.922415	-0.915962	-0.936747	-0.929377	-0.923717	-0.91641	-0.90927	-0.925333	-0.91777	-0.920803	-0.897686	-0.904684	-0.898757	-0.934876	-0.941675	-0.942085	-0.951556	-0.946906	-0.93641	0.220581	0.179513	0.165223
	183126	-0.619058	-0.498447	-0.524278	-0.920735	-0.800724	-0.717613	-0.777882	-0.855726	-0.939512	-0.913172	-0.966383	-0.991715	-0.963751	-0.996715	-0.974483	-0.97117	-0.973412	-0.976057	-0.995643	-0.991234	-0.996263	-0.994156	-0.98473	-0.963697	-0.851033	-0.938613	-0.9202	-0.90934	-0.940086	-0.935579	-0.929962	-0.925764	-0.91756	-0.934969	-0.925124	-0.929065	-0.901989	-0.913981	-0.908862	-0.952809	-0.956591	-0.957059	-0.96765	-0.956857	-0.947179	0.316858	0.276446	0.262521
	180195	-0.192583	-0.0726738	-0.105144	-0.618101	-0.392582	-0.272882	-0.35265	-0.472486	-0.632238	-0.989998	-0.946185	-0.874539	-0.964378	-0.896582	-0.837395	-0.825926	-0.758102	-0.75863	-0.827743	-0.882909	-0.8572	-0.882139	-0.887191	-0.934183	-0.99074	-0.9596	-0.960495	-0.971859	-0.941936	-0.932818	-0.933262	-0.921951	-0.926267	-0.919985	-0.929562	-0.925911	-0.939855	-0.922398	-0.919097	-0.877853	-0.891333	-0.890839	-0.87901	-0.913288	-0.913047	-0.0857118	-0.13687	-0.149158
	188697	-0.110673	0.0289454	-0.00234414	-0.573643	-0.365101	-0.243888	-0.335978	-0.46435	-0.635601	-0.950507	-0.899918	-0.833962	-0.941243	-0.877761	-0.876755	-0.868884	-0.790039	-0.786259	-0.834833	-0.895805	-0.864882	-0.889742	-0.908017	-0.954337	-0.995464	-0.977956	-0.986185	-0.991421	-0.97194	-0.969897	-0.972412	-0.968082	-0.973225	-0.963379	-0.972376	-0.969005	-0.984219	-0.972257	-0.971931	-0.926593	-0.934237	-0.933606	-0.917813	-0.948409	-0.953662	0.0779009	0.0242789	0.0133706
	181034	-0.198731	-0.105677	-0.100983	-0.283277	-0.408722	-0.418258	-0.45649	-0.465829	-0.457763	0.0237967	-0.045581	-0.152936	-0.108053	-0.215325	-0.445402	-0.464248	-0.48586	-0.473151	-0.363187	-0.331883	-0.340837	-0.317129	-0.349094	-0.284727	-0.0647564	-0.230549	-0.236094	-0.193669	-0.287768	-0.315491	-0.316456	-0.346043	-0.336665	-0.347803	-0.327322	-0.335535	-0.299739	-0.346328	-0.354154	-0.420999	-0.393126	-0.393558	-0.400891	-0.347568	-0.356804	0.975681	0.968293	0.968977
	175981	-0.0997968	-0.0291144	-0.0187765	-0.118927	-0.276532	-0.304889	-0.330759	-0.322449	-0.293443	0.212314	0.147282	0.0378761	0.0840628	-0.0239137	-0.26508	-0.285397	-0.310581	-0.297187	-0.178488	-0.144386	-0.15408	-0.128929	-0.162709	-0.0977863	0.11263	-0.0449737	-0.0533577	-0.0111157	-0.104047	-0.133483	-0.13529	-0.166694	-0.158137	-0.167206	-0.147296	-0.155272	-0.122103	-0.168735	-0.177661	-0.241371	-0.211668	-0.212064	-0.218558	-0.164013	-0.174907	0.952385	0.953542	0.956965
	176879	-0.322995	-0.263271	-0.251966	-0.27829	-0.458912	-0.499543	-0.511124	-0.48356	-0.421239	0.191827	0.0862861	-0.0542325	0.0468149	-0.0947575	-0.307684	-0.328303	-0.386256	-0.376703	-0.255233	-0.195721	-0.220146	-0.185367	-0.20448	-0.115327	0.147016	-0.045232	-0.0411724	0.00491793	-0.102964	-0.128968	-0.127036	-0.155972	-0.142191	-0.162592	-0.135953	-0.146523	-0.0972488	-0.150774	-0.156847	-0.25476	-0.22579	-0.226635	-0.244138	-0.175885	-0.17934	0.987734	0.993564	0.995127
	180218	-0.285398	-0.23698	-0.223126	-0.207939	-0.402957	-0.452493	-0.457613	-0.421244	-0.348224	0.276	0.171409	0.0296316	0.133046	-0.00927426	-0.224204	-0.245344	-0.306016	-0.296409	-0.171792	-0.110279	-0.135542	-0.0999292	-0.119025	-0.0292029	0.229041	0.0405053	0.0438156	0.0896233	-0.0175397	-0.0439542	-0.0422476	-0.0716638	-0.0581271	-0.0779444	-0.0514691	-0.0619656	-0.0135435	-0.0669733	-0.0733666	-0.170651	-0.141113	-0.141956	-0.159451	-0.0905494	-0.0943854	0.970535	0.98047	0.98319
	175938	-0.167822	-0.11943	-0.10482	-0.104253	-0.295896	-0.34404	-0.352726	-0.320998	-0.25804	0.324265	0.238201	0.109583	0.189459	0.0616545	-0.167592	-0.188889	-0.236091	-0.224689	-0.0995589	-0.0485004	-0.0675277	-0.0358083	-0.0616042	0.017772	0.251299	0.0796526	0.0769844	0.121043	0.0206976	-0.00753349	-0.00762208	-0.0384569	-0.0273645	-0.0418283	-0.018409	-0.0277232	0.0131359	-0.0372692	-0.0451201	-0.126864	-0.0966548	-0.0972949	-0.109838	-0.046674	-0.05407	0.949353	0.959057	0.963155
	182635	-0.195323	-0.143243	-0.129486	-0.140031	-0.328162	-0.373837	-0.384111	-0.354448	-0.293354	0.29259	0.203577	0.073272	0.155689	0.0258645	-0.201571	-0.222748	-0.27098	-0.259795	-0.13535	-0.0834151	-0.103043	-0.0709879	-0.0959972	-0.015245	0.223452	0.047952	0.0462852	0.0907882	-0.0109599	-0.0389098	-0.0386953	-0.0692864	-0.0577684	-0.0731509	-0.0492157	-0.0587335	-0.016508	-0.0674825	-0.0750672	-0.159261	-0.129228	-0.129897	-0.14312	-0.0792313	-0.0860684	0.960267	0.968744	0.972313
	176567	0.0184982	0.0727101	0.0866549	0.0354718	-0.136195	-0.175036	-0.193804	-0.176572	-0.139598	0.347167	0.295155	0.1937	0.228831	0.130221	-0.116822	-0.137511	-0.158208	-0.143999	-0.0232186	0.00696189	-0.000134721	0.0234224	-0.013431	0.0451835	0.231973	0.0920034	0.0794209	0.11945	0.0331918	0.00277867	-0.000304836	-0.0325142	-0.0258323	-0.0309235	-0.0133566	-0.0204064	0.00669629	-0.0371639	-0.0471575	-0.0999852	-0.0697479	-0.0700181	-0.0735776	-0.0225053	-0.0356943	0.898382	0.904843	0.910514
	176724	-0.0886043	-0.0292524	-0.0164989	-0.0715196	-0.244621	-0.282323	-0.300888	-0.282621	-0.24049	0.286651	0.218298	0.104506	0.158478	0.0463242	-0.193907	-0.214739	-0.245755	-0.232697	-0.110794	-0.0722586	-0.0842249	-0.0573189	-0.0896014	-0.0215556	0.190578	0.0327043	0.0249092	0.0673129	-0.0265488	-0.0560229	-0.0576534	-0.0892582	-0.080383	-0.090087	-0.0696264	-0.0778049	-0.0437422	-0.0910198	-0.0999491	-0.166625	-0.136466	-0.136905	-0.144522	-0.0879555	-0.0984405	0.940953	0.94631	0.950595
	178660	-0.464798	-0.448192	-0.430716	-0.275003	-0.50169	-0.573886	-0.553403	-0.485618	-0.365323	0.349685	0.208267	0.0400072	0.201241	0.0303745	-0.139319	-0.159955	-0.257065	-0.252455	-0.129583	-0.0410414	-0.0822984	-0.0372551	-0.0382702	0.0732745	0.365455	0.156851	0.172981	0.219347	0.104213	0.0830851	0.0885902	0.0634941	0.0816061	0.0512271	0.0831341	0.0705792	0.132471	0.0753366	0.0722073	-0.0557439	-0.0284433	-0.0297302	-0.0583966	0.021825	0.0261793	0.914343	0.934566	0.936592
	174887	0.371352	0.440467	0.44955	0.265	0.164288	0.155749	0.113213	0.0918607	0.0629577	0.291384	0.314461	0.280966	0.218221	0.191053	-0.0643537	-0.0811414	-0.0428507	-0.0244368	0.071847	0.0541682	0.0730836	0.0766161	0.0209488	0.0298977	0.103295	0.0409015	0.00982819	0.037433	-0.0109996	-0.0422969	-0.0510441	-0.0822246	-0.0851684	-0.0708416	-0.0671138	-0.0687896	-0.0723174	-0.098009	-0.111088	-0.0990756	-0.0724976	-0.0719776	-0.0566408	-0.0365292	-0.0599341	0.709343	0.705231	0.712628
	178782	0.263467	0.332201	0.342304	0.184136	0.0636305	0.0479816	0.0101862	-0.0021284	-0.0144011	0.293406	0.294142	0.239879	0.20474	0.155755	-0.101648	-0.11981	-0.0978335	-0.080336	0.0244276	0.0202972	0.0319703	0.0413862	-0.00972158	0.0141628	0.124062	0.0362374	0.010294	0.0422406	-0.0186795	-0.0502237	-0.0573853	-0.0893685	-0.0894184	-0.0807875	-0.0727887	-0.0761299	-0.0703164	-0.101993	-0.114322	-0.12171	-0.0936508	-0.0933586	-0.0834015	-0.0537512	-0.0744518	0.784195	0.782184	0.788925
	191723	0.144419	0.174382	0.192709	0.215364	0.0277269	-0.0250424	-0.0323394	-0.00173119	0.0484936	0.509314	0.470825	0.3789	0.405274	0.317646	0.0736101	0.0530082	0.034791	0.0491772	0.169455	0.196727	0.191432	0.213393	0.175399	0.227037	0.383988	0.2668	0.250641	0.287094	0.210209	0.179832	0.175635	0.143621	0.148306	0.147154	0.161981	0.156025	0.176411	0.136597	0.125855	0.0845616	0.114519	0.114366	0.113389	0.160116	0.145233	0.806366	0.820075	0.82827
	178049	0.247484	0.286089	0.302447	0.270873	0.106607	0.0651385	0.0482522	0.0645656	0.0916447	0.475692	0.459992	0.388292	0.383452	0.317076	0.0665731	0.0469889	0.0479284	0.06389	0.17765	0.189667	0.192761	0.208531	0.163888	0.200539	0.325664	0.2298	0.207719	0.240984	0.174465	0.143381	0.137382	0.105258	0.107054	0.111854	0.122618	0.118233	0.129546	0.0947343	0.0829168	0.0612132	0.0903854	0.0904784	0.095463	0.133041	0.11477	0.766274	0.775656	0.784199
	259738	0.171649	0.214278	0.230216	0.197834	0.0281126	-0.0139221	-0.0305549	-0.012502	0.019878	0.443995	0.415306	0.332441	0.342345	0.264008	0.0135571	-0.00657418	-0.0138416	0.0015535	0.118728	0.137636	0.136943	0.155701	0.113708	0.158503	0.305653	0.194132	0.17528	0.211055	0.137301	0.106286	0.101281	0.0689392	0.0724635	0.0738076	0.0870346	0.0816855	0.0985956	0.0604159	0.0491644	0.0162698	0.046016	0.0459789	0.047905	0.0905762	0.0740119	0.813933	0.822926	0.830642
	177177	-0.100403	-0.0635399	-0.0465252	-0.00990641	-0.211622	-0.267218	-0.270479	-0.231954	-0.16219	0.411779	0.332472	0.207809	0.282954	0.159916	-0.0713665	-0.0928839	-0.13866	-0.126933	-0.000530067	0.0491028	0.0310958	0.0621799	0.0351325	0.111391	0.331433	0.170051	0.165232	0.207934	0.11145	0.0827982	0.0820521	0.0508675	0.0609589	0.048588	0.0707486	0.061935	0.0995071	0.0506887	0.0422888	-0.0338061	-0.00333794	-0.00391623	-0.0150433	0.0463856	0.0378571	0.913575	0.927001	0.932485
	13192832	-0.0335873	0.00638092	0.0229972	0.0372293	-0.156403	-0.207981	-0.215508	-0.182979	-0.123584	0.415087	0.348288	0.233609	0.291983	0.179655	-0.0586886	-0.0799894	-0.115736	-0.102934	0.0219001	0.0636751	0.05016	0.0781954	0.0469391	0.115544	0.318885	0.168725	0.160234	0.201546	0.110063	0.0805577	0.0787041	0.0469672	0.055447	0.0465171	0.0665479	0.0585571	0.0911237	0.0446376	0.0354388	-0.0300419	0.000465705	2.45755e-05	-0.00776197	0.04923	0.0385386	0.897875	0.909812	0.915813
	180194	-0.0392479	0.00255873	0.0188273	0.0266962	-0.165215	-0.215555	-0.2241	-0.192847	-0.134961	0.403303	0.336219	0.221462	0.279582	0.167107	-0.071563	-0.0928385	-0.128236	-0.115407	0.00926419	0.050821	0.0374106	0.0653831	0.0340327	0.102693	0.307141	0.156055	0.147648	0.189106	0.0972907	0.0677695	0.0659428	0.034196	0.0427309	0.0336976	0.0537997	0.0457791	0.0785471	0.0319325	0.0227569	-0.0429615	-0.0124619	-0.0129042	-0.0207035	0.0363249	0.0256587	0.902776	0.914114	0.919954
	259559	-0.152413	-0.111267	-0.0952307	-0.068018	-0.26764	-0.321087	-0.325477	-0.28817	-0.218249	0.37059	0.284245	0.154636	0.237246	0.10866	-0.119397	-0.140878	-0.190475	-0.179241	-0.0529526	-0.00018766	-0.0200815	0.0122526	-0.0128812	0.0672126	0.298668	0.12907	0.1264	0.170154	0.0703391	0.0421577	0.0420638	0.0112218	0.0222798	0.00786317	0.0312697	0.0219683	0.0626226	0.0123503	0.00445687	-0.0775703	-0.0472403	-0.0478902	-0.0607216	0.00289329	-0.00442919	0.934707	0.946899	0.951584
	176117	-0.0676731	-0.02258	-0.00698281	-0.00773224	-0.197761	-0.246333	-0.25609	-0.226212	-0.169167	0.376549	0.305857	0.188561	0.250127	0.134784	-0.102864	-0.124132	-0.161157	-0.148528	-0.023864	0.019087	0.00483349	0.0333923	0.00284927	0.0734496	0.28429	0.128514	0.12117	0.163274	0.0695476	0.0402027	0.0387008	0.00707072	0.0161107	0.00602812	0.0267927	0.0185113	0.0529137	0.00546772	-0.00346375	-0.0722329	-0.0417664	-0.042244	-0.0508698	0.00728996	-0.00280086	0.917125	0.927499	0.932862
	183155	-0.0869549	-0.0406142	-0.0253029	-0.0280996	-0.217889	-0.265971	-0.275912	-0.246157	-0.188604	0.363543	0.290068	0.170736	0.235392	0.117794	-0.118649	-0.139924	-0.178594	-0.166159	-0.041409	0.00288069	-0.0121638	0.0169309	-0.0128451	0.0593208	0.274568	0.115651	0.109137	0.151652	0.0566191	0.0274451	0.0261951	-0.00531814	0.0040992	-0.0067791	0.0144783	0.00600435	0.0416069	-0.0064184	-0.0151604	-0.0862816	-0.0558464	-0.0563526	-0.0656612	-0.0065976	-0.0162212	0.924895	0.934944	0.940035
	173107	0.190771	0.249651	0.262289	0.160353	0.0144767	-0.013527	-0.0417532	-0.0395412	-0.0292615	0.350141	0.331953	0.259636	0.251114	0.183424	-0.0720882	-0.0914721	-0.0862026	-0.0698158	0.0425858	0.0518649	0.0563502	0.0713421	0.025257	0.062252	0.199035	0.093321	0.0718491	0.106768	0.036619	0.00518552	-0.000607079	-0.0330082	-0.0306951	-0.0268095	-0.0153412	-0.0200238	-0.00674701	-0.0429776	-0.0546379	-0.0784416	-0.0492274	-0.0491391	-0.0440914	-0.006193	-0.0243877	0.821929	0.824762	0.831632
	175166	0.0450432	0.0913213	0.106809	0.0830213	-0.0962968	-0.140553	-0.154973	-0.132236	-0.0888136	0.399658	0.34912	0.248088	0.283991	0.186134	-0.0600278	-0.0808548	-0.10288	-0.0887443	0.0329049	0.0639048	0.0564439	0.0802417	0.0436443	0.101925	0.28373	0.147885	0.134828	0.174243	0.0894357	0.0590229	0.0557895	0.0235602	0.0299717	0.02541	0.0426397	0.0357297	0.0618686	0.018561	0.00843057	-0.0431793	-0.0128585	-0.0131207	-0.0165495	0.0343357	0.0209634	0.87783	0.886908	0.893305
	181307	0.154502	0.203956	0.218636	0.162202	-0.00109722	-0.0385163	-0.0590388	-0.0458579	-0.019375	0.402049	0.372885	0.290123	0.298336	0.219888	-0.032321	-0.0523711	-0.0579178	-0.0423579	0.0742713	0.0920443	0.0919373	0.110345	0.0677743	0.112455	0.262972	0.148523	0.12978	0.166054	0.0912581	0.0601159	0.0551517	0.0227157	0.0263671	0.0274998	0.0408978	0.0354744	0.0528947	0.014322	0.00310575	-0.0301845	-0.000435757	-0.000470635	0.00156704	0.0442056	0.0276148	0.831712	0.838478	0.845647
	182919	-0.249893	-0.394823	-0.379721	0.15457	0.076485	-0.00299004	0.0926744	0.199698	0.345106	0.432764	0.370364	0.339467	0.471753	0.437401	0.621284	0.627454	0.537941	0.521535	0.488779	0.549805	0.511436	0.528697	0.583841	0.616308	0.609421	0.629943	0.660707	0.646407	0.662046	0.683279	0.692145	0.711461	0.718557	0.698578	0.704137	0.702224	0.719847	0.727367	0.737031	0.687723	0.674341	0.67342	0.648843	0.659804	0.681744	-0.530006	-0.489649	-0.487973
	190598	-0.249893	-0.394823	-0.379721	0.15457	0.076485	-0.00299004	0.0926744	0.199698	0.345106	0.432764	0.370364	0.339467	0.471753	0.437401	0.621284	0.627454	0.537941	0.521535	0.488779	0.549805	0.511436	0.528697	0.583841	0.616308	0.609421	0.629943	0.660707	0.646407	0.662046	0.683279	0.692145	0.711461	0.718557	0.698578	0.704137	0.702224	0.719847	0.727367	0.737031	0.687723	0.674341	0.67342	0.648843	0.659804	0.681744	-0.530006	-0.489649	-0.487973
	173731	-0.223772	-0.351543	-0.345277	0.0774427	0.0780449	0.0316209	0.110909	0.186398	0.285164	0.191212	0.157888	0.166874	0.259837	0.264891	0.49301	0.504922	0.441562	0.42382	0.35683	0.394724	0.366827	0.372525	0.428513	0.435013	0.370716	0.430841	0.45985	0.435547	0.475754	0.502796	0.510985	0.537116	0.540722	0.526153	0.52495	0.525683	0.531339	0.551569	0.56269	0.540235	0.519438	0.518789	0.500334	0.492138	0.514124	-0.706945	-0.67885	-0.679924
	174896	-0.0173934	-0.142798	-0.138692	0.227729	0.267205	0.235316	0.304525	0.361571	0.427034	0.180734	0.190472	0.239331	0.278483	0.325415	0.555816	0.57031	0.538894	0.523038	0.440071	0.451561	0.43782	0.432133	0.478959	0.456704	0.323078	0.43134	0.450337	0.417897	0.48173	0.509073	0.514173	0.541682	0.539723	0.536156	0.526776	0.530694	0.518433	0.549996	0.559617	0.574521	0.550998	0.550791	0.542795	0.516313	0.532972	-0.844353	-0.820748	-0.820628
	191093	-0.0794701	-0.212793	-0.205624	0.213725	0.222316	0.176916	0.254697	0.3264	0.414741	0.253048	0.243681	0.272152	0.337065	0.363169	0.585736	0.598286	0.550642	0.534319	0.463166	0.48818	0.467556	0.467911	0.517909	0.509867	0.407422	0.494428	0.516948	0.488707	0.540934	0.567186	0.573394	0.599259	0.599681	0.591656	0.586084	0.588521	0.584003	0.609766	0.619588	0.617608	0.596334	0.595932	0.583335	0.566353	0.584757	-0.777464	-0.748838	-0.748283
	187167	-0.756456	-0.838789	-0.834779	-0.458768	-0.514576	-0.564938	-0.492339	-0.408903	-0.276271	-0.022904	-0.153208	-0.236242	-0.0401862	-0.132353	0.052973	0.0578871	-0.061985	-0.0809864	-0.105733	-0.0178491	-0.0717092	-0.0424139	0.0246145	0.0956426	0.215551	0.142819	0.191711	0.191654	0.167331	0.189647	0.2041	0.223318	0.23988	0.200831	0.219403	0.212358	0.260989	0.250698	0.264042	0.156728	0.144799	0.14323	0.103675	0.138266	0.169578	-0.212531	-0.189038	-0.195507
	191040	-0.268822	-0.334783	-0.345465	-0.197813	-0.0738788	-0.0560721	-0.0199635	-0.00990342	-0.000495199	-0.311888	-0.312316	-0.257423	-0.223564	-0.174029	0.0831921	0.101457	0.0805415	0.0630998	-0.0423014	-0.038956	-0.0502372	-0.0599561	-0.00909539	-0.0334184	-0.142943	-0.0556049	-0.0296797	-0.0615782	-0.000692463	0.0308672	0.0380242	0.0700504	0.0700882	0.0614804	0.0534404	0.0567949	0.0509727	0.082683	0.0950354	0.102714	0.0745651	0.0742785	0.0644719	0.0345295	0.0551987	-0.779931	-0.778911	-0.785883
	188571	-0.485888	-0.563997	-0.569374	-0.315666	-0.256341	-0.265389	-0.211403	-0.170281	-0.109462	-0.213595	-0.266923	-0.264166	-0.161576	-0.166092	0.0810352	0.0952059	0.0322783	0.0128956	-0.0674032	-0.0292708	-0.0587846	-0.0532984	0.00796455	0.0206961	-0.00376083	0.0250867	0.0622783	0.0409467	0.0717174	0.101859	0.112514	0.141702	0.148463	0.126835	0.129026	0.128399	0.144285	0.161266	0.174934	0.136368	0.112743	0.111913	0.0892514	0.0833854	0.109923	-0.608064	-0.59762	-0.604856
	190215	-0.483702	-0.565391	-0.569867	-0.300711	-0.247775	-0.260288	-0.203845	-0.159125	-0.0934227	-0.18671	-0.241766	-0.241312	-0.135481	-0.142232	0.103984	0.117858	0.0525996	0.0331574	-0.0453382	-0.00534576	-0.035777	-0.02949	0.0321731	0.0464803	0.0240825	0.0517617	0.0891722	0.0681575	0.0979992	0.127977	0.138702	0.167653	0.1746	0.152642	0.155172	0.154416	0.170883	0.187339	0.200969	0.160838	0.137538	0.136688	0.113544	0.10876	0.135414	-0.606409	-0.594478	-0.601405
	186765	-0.382589	-0.462431	-0.468816	-0.234986	-0.155026	-0.157453	-0.106932	-0.0737972	-0.0282652	-0.215141	-0.246546	-0.222519	-0.146119	-0.128405	0.125408	0.141231	0.0936646	0.0748516	-0.015508	0.00958198	-0.0131227	-0.0135149	0.0442535	0.0419595	-0.0206028	0.035067	0.0676745	0.0414678	0.0856675	0.116619	0.125841	0.156386	0.160298	0.144124	0.141971	0.143043	0.149614	0.17306	0.186205	0.166815	0.141249	0.140636	0.123053	0.107334	0.131589	-0.697412	-0.688692	-0.695332
	187208	-0.40379	-0.483253	-0.489474	-0.251916	-0.175789	-0.179429	-0.12824	-0.0935879	-0.0451049	-0.215968	-0.251744	-0.231876	-0.150251	-0.136898	0.115889	0.131408	0.0807879	0.0618417	-0.0266625	0.00100704	-0.0230569	-0.0222982	0.0362215	0.0368835	-0.0181807	0.0322148	0.0657699	0.0405005	0.0820891	0.112918	0.122436	0.15275	0.157232	0.139958	0.138661	0.139398	0.147824	0.170018	0.183284	0.160082	0.134865	0.134209	0.115605	0.101807	0.126542	-0.680338	-0.671313	-0.67809
	180283	-0.366986	-0.440088	-0.448286	-0.247681	-0.152731	-0.147585	-0.102467	-0.0775396	-0.0439169	-0.264176	-0.288456	-0.256627	-0.191115	-0.165528	0.0898537	0.10643	0.066062	0.0475512	-0.0474277	-0.0281519	-0.0478725	-0.0507571	0.00538001	-0.00240464	-0.0750163	-0.0128519	0.0183991	-0.0091012	0.0389062	0.0701456	0.0789469	0.11001	0.113069	0.0985236	0.0950072	0.0966045	0.100466	0.125879	0.138939	0.125841	0.0994671	0.0989316	0.0832022	0.0638642	0.0873884	-0.712338	-0.706715	-0.713792
	178718	-0.427614	-0.502472	-0.509526	-0.286013	-0.206835	-0.207824	-0.158817	-0.126713	-0.080761	-0.246769	-0.285094	-0.267017	-0.183753	-0.172465	0.0797539	0.0952578	0.044181	0.0252018	-0.0632154	-0.0350052	-0.0594051	-0.0583485	0.000384316	0.00235806	-0.0470718	-0.000980139	0.03325	0.00865569	0.0484756	0.0792979	0.0890261	0.119304	0.124162	0.106145	0.105366	0.105896	0.115589	0.13702	0.150428	0.125052	0.0998871	0.0992088	0.0801187	0.0671374	0.0921921	-0.662934	-0.655287	-0.662543
	178722	-0.427614	-0.502472	-0.509526	-0.286013	-0.206835	-0.207824	-0.158817	-0.126713	-0.080761	-0.246769	-0.285094	-0.267017	-0.183753	-0.172465	0.0797539	0.0952578	0.044181	0.0252018	-0.0632154	-0.0350052	-0.0594051	-0.0583485	0.000384316	0.00235806	-0.0470718	-0.000980139	0.03325	0.00865569	0.0484756	0.0792979	0.0890261	0.119304	0.124162	0.106145	0.105366	0.105896	0.115589	0.13702	0.150428	0.125052	0.0998871	0.0992088	0.0801187	0.0671374	0.0921921	-0.662934	-0.655287	-0.662543
	184916	-0.334214	-0.445816	-0.443808	-0.0751026	-0.0530684	-0.0865897	-0.0149998	0.0494651	0.136731	0.0408839	-0.00193891	0.00380819	0.103871	0.104271	0.344506	0.357469	0.292068	0.273267	0.20017	0.239667	0.210179	0.216219	0.27567	0.285449	0.236824	0.285019	0.318044	0.294569	0.331411	0.360212	0.369601	0.397427	0.402463	0.384592	0.384876	0.385021	0.395181	0.414306	0.426679	0.396599	0.374344	0.373601	0.352865	0.345865	0.370205	-0.680745	-0.658673	-0.662157
	6418698	-0.346421	-0.450009	-0.450349	-0.117277	-0.0783448	-0.103243	-0.0371386	0.0187973	0.0945575	-0.0299163	-0.0691287	-0.0575681	0.0357248	0.0416672	0.287479	0.301376	0.240999	0.222089	0.143386	0.178716	0.15114	0.155241	0.214503	0.2205	0.166424	0.217901	0.250876	0.226326	0.265898	0.295513	0.30487	0.333679	0.338343	0.321005	0.320471	0.32093	0.329853	0.350518	0.36317	0.336491	0.313106	0.312401	0.292571	0.28278	0.307181	-0.692832	-0.674375	-0.678738
	6418710	-0.284306	-0.389592	-0.390159	-0.0646521	-0.0166448	-0.0389327	0.0257096	0.0781048	0.146521	-0.0202439	-0.0473405	-0.024589	0.0543819	0.0721268	0.319813	0.33445	0.282343	0.263858	0.180613	0.208978	0.185118	0.186141	0.243176	0.241156	0.166452	0.23247	0.262697	0.235643	0.282273	0.312095	0.3206	0.349907	0.352983	0.338747	0.335865	0.337242	0.341009	0.365031	0.377288	0.361136	0.336919	0.336335	0.31935	0.304409	0.327393	-0.738752	-0.720827	-0.724702
	28661643	-0.281151	-0.368528	-0.374044	-0.131252	-0.045633	-0.0486366	0.0028966	0.0353067	0.0758398	-0.163203	-0.177762	-0.139153	-0.0810483	-0.0476889	0.207781	0.224368	0.186741	0.168526	0.0734503	0.0900342	0.0719724	0.0677972	0.122567	0.109722	0.0173119	0.0944038	0.122947	0.0932133	0.147314	0.178362	0.186327	0.217329	0.218979	0.207274	0.201864	0.204214	0.203407	0.23145	0.243914	0.239071	0.212635	0.212187	0.198459	0.176061	0.198224	-0.767676	-0.757781	-0.763226
	182055	-0.412159	-0.498462	-0.502805	-0.232529	-0.171305	-0.182509	-0.12607	-0.0834115	-0.0235234	-0.163405	-0.205204	-0.192369	-0.101224	-0.094889	0.155484	0.170237	0.11319	0.0940469	0.0102115	0.0430952	0.0164074	0.0194351	0.079194	0.0847342	0.0382195	0.0831537	0.117708	0.0936245	0.131818	0.16225	0.172082	0.201792	0.20698	0.188398	0.188283	0.188564	0.199246	0.219655	0.232918	0.204347	0.17998	0.179259	0.159093	0.148578	0.173832	-0.666855	-0.654714	-0.660963
	189483	-0.412159	-0.498462	-0.502805	-0.232529	-0.171305	-0.182509	-0.12607	-0.0834115	-0.0235234	-0.163405	-0.205204	-0.192369	-0.101224	-0.094889	0.155484	0.170237	0.11319	0.0940469	0.0102115	0.0430952	0.0164074	0.0194351	0.079194	0.0847342	0.0382195	0.0831537	0.117708	0.0936245	0.131818	0.16225	0.172082	0.201792	0.20698	0.188398	0.188283	0.188564	0.199246	0.219655	0.232918	0.204347	0.17998	0.179259	0.159093	0.148578	0.173832	-0.666855	-0.654714	-0.660963
	188139	-0.426553	-0.516865	-0.51991	-0.227482	-0.177816	-0.194435	-0.134441	-0.0860163	-0.0175392	-0.129555	-0.177196	-0.170887	-0.0713679	-0.0716301	0.176083	0.190163	0.127675	0.10839	0.0286453	0.066024	0.0370705	0.0420956	0.102859	0.112924	0.0755754	0.114388	0.149948	0.127131	0.161808	0.191851	0.202001	0.231139	0.237038	0.21714	0.218191	0.218021	0.231005	0.249622	0.262908	0.229149	0.205554	0.204772	0.183167	0.175702	0.201454	-0.648445	-0.634183	-0.640142
	178424	-0.399078	-0.489846	-0.493163	-0.206058	-0.150877	-0.165723	-0.106657	-0.0603667	0.0040294	-0.130054	-0.171855	-0.159876	-0.0673344	-0.0616715	0.187837	0.202358	0.143963	0.124829	0.0423968	0.0762995	0.0491602	0.0526181	0.112453	0.118514	0.0710118	0.11697	0.151311	0.127194	0.165451	0.195712	0.20548	0.234982	0.240123	0.221676	0.22157	0.221852	0.232355	0.252696	0.265843	0.237193	0.213079	0.212355	0.192103	0.182011	0.207156	-0.672269	-0.65847	-0.664271
	3565552	-0.406451	-0.497859	-0.500896	-0.208885	-0.156741	-0.172868	-0.113001	-0.0653041	0.00134523	-0.12389	-0.167757	-0.157938	-0.0626773	-0.0592312	0.189487	0.20381	0.143726	0.12454	0.0433101	0.0786256	0.0507633	0.0548529	0.11503	0.122601	0.0785139	0.122128	0.156862	0.133199	0.170201	0.200354	0.210246	0.239582	0.244982	0.226047	0.226351	0.226473	0.237822	0.257541	0.270717	0.240244	0.21636	0.215614	0.194868	0.185781	0.211122	-0.664814	-0.650553	-0.656329
	182676	-0.380875	-0.475952	-0.478316	-0.176177	-0.125936	-0.143983	-0.0826028	-0.0332289	0.0347273	-0.0975649	-0.138254	-0.126092	-0.0335765	-0.0274962	0.221187	0.235545	0.176659	0.157584	0.0761292	0.110348	0.0831336	0.0867206	0.146387	0.152217	0.101969	0.150166	0.184035	0.159679	0.198602	0.228698	0.238323	0.267652	0.272601	0.254574	0.254266	0.25463	0.264496	0.285059	0.298052	0.270288	0.246356	0.245641	0.225576	0.215429	0.240327	-0.681029	-0.665719	-0.67105
	3565652	-0.481811	-0.576937	-0.577644	-0.246756	-0.222205	-0.249234	-0.183063	-0.123439	-0.0370574	-0.0769201	-0.140803	-0.151922	-0.0311878	-0.0492764	0.190309	0.202688	0.126987	0.107421	0.0379778	0.0864979	0.0519168	0.0620035	0.125094	0.147238	0.137473	0.157279	0.195729	0.17671	0.201083	0.230041	0.241105	0.268695	0.276635	0.252959	0.257301	0.255848	0.275514	0.289006	0.302417	0.254276	0.232701	0.231756	0.206334	0.207012	0.234143	-0.584478	-0.566499	-0.572188
	173532	-0.462089	-0.460062	-0.481528	-0.557552	-0.388991	-0.331843	-0.33241	-0.364883	-0.4043	-0.68813	-0.702808	-0.659252	-0.631185	-0.595157	-0.370342	-0.352978	-0.363616	-0.378892	-0.479578	-0.481185	-0.489456	-0.499334	-0.45488	-0.472309	-0.52772	-0.484223	-0.456517	-0.479958	-0.437913	-0.409494	-0.401675	-0.372749	-0.370247	-0.382844	-0.386931	-0.385204	-0.381781	-0.358245	-0.34595	-0.350956	-0.376793	-0.377142	-0.387686	-0.41201	-0.391608	-0.534172	-0.553283	-0.565289
	190216	-0.397963	-0.388972	-0.412073	-0.528914	-0.342794	-0.277014	-0.284678	-0.32772	-0.383853	-0.720996	-0.720526	-0.663174	-0.656213	-0.605771	-0.384543	-0.366402	-0.36394	-0.378202	-0.483825	-0.495871	-0.498451	-0.512589	-0.472489	-0.500078	-0.576543	-0.519023	-0.495144	-0.520751	-0.471727	-0.443671	-0.437018	-0.408047	-0.407452	-0.416148	-0.422952	-0.420175	-0.42274	-0.395802	-0.384166	-0.376113	-0.402598	-0.402783	-0.409355	-0.43994	-0.421721	-0.560575	-0.583055	-0.594976
	178723	-0.721158	-0.735024	-0.74967	-0.69199	-0.604478	-0.581226	-0.559368	-0.552943	-0.528417	-0.556823	-0.6359	-0.656311	-0.54428	-0.574471	-0.363295	-0.351063	-0.413176	-0.430739	-0.499986	-0.458943	-0.489503	-0.480696	-0.423769	-0.395824	-0.34752	-0.375279	-0.334032	-0.344486	-0.339339	-0.312832	-0.300805	-0.275534	-0.264862	-0.293231	-0.284826	-0.28796	-0.258141	-0.25269	-0.238882	-0.300242	-0.320375	-0.321386	-0.347564	-0.342321	-0.314895	-0.323337	-0.330465	-0.342623
	4363084	-0.721158	-0.735024	-0.74967	-0.69199	-0.604478	-0.581226	-0.559368	-0.552943	-0.528417	-0.556823	-0.6359	-0.656311	-0.54428	-0.574471	-0.363295	-0.351063	-0.413176	-0.430739	-0.499986	-0.458943	-0.489503	-0.480696	-0.423769	-0.395824	-0.34752	-0.375279	-0.334032	-0.344486	-0.339339	-0.312832	-0.300805	-0.275534	-0.264862	-0.293231	-0.284826	-0.28796	-0.258141	-0.25269	-0.238882	-0.300242	-0.320375	-0.321386	-0.347564	-0.342321	-0.314895	-0.323337	-0.330465	-0.342623
	189630	-0.554886	-0.556831	-0.576531	-0.613952	-0.468848	-0.421321	-0.415252	-0.436239	-0.456246	-0.660307	-0.696266	-0.673096	-0.617587	-0.602802	-0.380229	-0.364333	-0.3916	-0.407766	-0.499408	-0.487302	-0.502843	-0.50679	-0.457866	-0.46069	-0.482259	-0.46206	-0.429602	-0.448977	-0.418694	-0.390603	-0.381315	-0.353275	-0.348055	-0.365981	-0.366004	-0.365858	-0.353686	-0.335862	-0.322929	-0.346466	-0.370729	-0.371297	-0.387046	-0.401992	-0.379072	-0.468185	-0.483987	-0.496273
	177381	-0.591439	-0.606794	-0.623746	-0.60009	-0.476811	-0.441639	-0.425256	-0.431924	-0.431251	-0.58716	-0.635554	-0.62423	-0.548813	-0.546175	-0.318356	-0.303193	-0.343543	-0.360773	-0.447717	-0.425456	-0.446509	-0.446445	-0.393119	-0.387161	-0.394494	-0.383018	-0.347379	-0.365477	-0.339967	-0.311394	-0.301146	-0.273008	-0.266295	-0.287336	-0.28523	-0.285897	-0.269166	-0.253789	-0.240319	-0.274582	-0.298325	-0.299037	-0.318312	-0.327903	-0.303065	-0.465694	-0.476203	-0.487978
	191311	-0.533042	-0.544959	-0.563367	-0.568891	-0.428063	-0.385547	-0.374083	-0.389245	-0.402584	-0.614462	-0.64857	-0.623172	-0.566372	-0.549145	-0.318709	-0.302443	-0.3314	-0.348097	-0.441804	-0.428967	-0.445078	-0.449127	-0.398639	-0.402689	-0.432911	-0.405713	-0.373124	-0.394058	-0.360448	-0.331504	-0.322203	-0.293309	-0.288411	-0.305935	-0.306587	-0.306181	-0.295305	-0.275965	-0.262852	-0.28463	-0.309586	-0.310151	-0.325947	-0.342037	-0.31879	-0.511554	-0.524655	-0.536367
	174706	-0.393018	-0.410845	-0.429846	-0.447444	-0.283974	-0.235583	-0.226387	-0.24901	-0.278491	-0.593665	-0.599767	-0.547498	-0.522924	-0.477495	-0.237612	-0.219298	-0.22975	-0.245817	-0.351974	-0.355026	-0.36284	-0.374139	-0.327754	-0.350762	-0.431054	-0.368307	-0.341577	-0.368955	-0.317776	-0.287734	-0.280267	-0.249601	-0.248378	-0.258886	-0.26513	-0.262533	-0.263724	-0.235984	-0.223551	-0.220843	-0.248261	-0.248552	-0.257982	-0.286528	-0.266153	-0.634386	-0.64846	-0.659122
	177246	-0.556576	-0.581726	-0.597495	-0.545371	-0.424208	-0.39322	-0.372071	-0.374013	-0.368664	-0.541244	-0.585164	-0.569256	-0.495851	-0.488286	-0.252775	-0.237109	-0.277192	-0.294817	-0.384663	-0.363271	-0.384024	-0.384739	-0.330466	-0.327452	-0.347543	-0.326227	-0.291101	-0.311216	-0.281011	-0.251605	-0.24154	-0.212505	-0.206454	-0.226411	-0.225423	-0.22564	-0.21129	-0.193746	-0.180202	-0.210441	-0.235008	-0.235688	-0.254363	-0.266172	-0.241358	-0.516573	-0.524639	-0.535755
	186565	-0.579123	-0.601245	-0.617209	-0.570703	-0.451664	-0.420353	-0.400138	-0.402408	-0.396453	-0.553637	-0.601574	-0.589684	-0.512445	-0.509111	-0.276841	-0.261542	-0.303616	-0.321186	-0.408851	-0.385574	-0.407259	-0.407006	-0.352606	-0.346849	-0.358456	-0.343363	-0.307539	-0.326444	-0.299305	-0.270265	-0.259975	-0.231392	-0.224797	-0.245737	-0.24388	-0.244441	-0.228244	-0.212152	-0.198575	-0.232366	-0.256431	-0.257147	-0.276621	-0.286539	-0.261449	-0.49031	-0.498844	-0.510214
	188839	-0.656911	-0.68812	-0.700957	-0.595292	-0.50846	-0.491567	-0.46157	-0.447696	-0.416387	-0.482631	-0.552432	-0.562869	-0.455954	-0.47557	-0.248263	-0.234867	-0.29553	-0.313894	-0.389906	-0.351325	-0.380956	-0.374026	-0.315259	-0.293714	-0.271063	-0.27921	-0.238926	-0.253493	-0.238743	-0.210445	-0.198767	-0.171548	-0.162217	-0.188415	-0.182321	-0.184527	-0.159521	-0.149578	-0.135564	-0.18854	-0.210503	-0.211447	-0.236312	-0.235894	-0.208478	-0.424203	-0.427333	-0.438404
	186355	-0.638857	-0.666105	-0.680069	-0.595868	-0.498796	-0.476945	-0.450482	-0.442104	-0.419059	-0.511001	-0.57484	-0.579079	-0.480753	-0.494042	-0.265791	-0.251854	-0.306999	-0.325104	-0.404434	-0.370334	-0.397637	-0.392629	-0.335206	-0.318056	-0.304173	-0.30651	-0.267446	-0.283104	-0.265152	-0.236682	-0.225383	-0.197813	-0.189214	-0.213996	-0.20904	-0.210806	-0.188134	-0.176577	-0.162679	-0.210421	-0.232959	-0.233839	-0.257183	-0.259631	-0.23287	-0.438622	-0.443716	-0.454982
	189488	-0.638857	-0.666105	-0.680069	-0.595868	-0.498796	-0.476945	-0.450482	-0.442104	-0.419059	-0.511001	-0.57484	-0.579079	-0.480753	-0.494042	-0.265791	-0.251854	-0.306999	-0.325104	-0.404434	-0.370334	-0.397637	-0.392629	-0.335206	-0.318056	-0.304173	-0.30651	-0.267446	-0.283104	-0.265152	-0.236682	-0.225383	-0.197813	-0.189214	-0.213996	-0.20904	-0.210806	-0.188134	-0.176577	-0.162679	-0.210421	-0.232959	-0.233839	-0.257183	-0.259631	-0.23287	-0.438622	-0.443716	-0.454982
	189485	-0.624028	-0.656885	-0.670051	-0.567844	-0.473645	-0.454768	-0.425307	-0.413605	-0.386795	-0.482699	-0.545269	-0.548255	-0.449522	-0.461401	-0.229547	-0.215457	-0.271384	-0.289724	-0.369909	-0.335497	-0.363034	-0.358093	-0.29999	-0.283581	-0.274641	-0.273007	-0.234012	-0.250494	-0.230729	-0.201884	-0.190618	-0.162669	-0.154283	-0.178748	-0.174164	-0.175778	-0.153918	-0.14155	-0.127602	-0.174185	-0.197029	-0.197905	-0.221194	-0.224269	-0.197422	-0.461607	-0.465129	-0.476023
	3565839	-0.666699	-0.703117	-0.714699	-0.584747	-0.507852	-0.496245	-0.462258	-0.442564	-0.402922	-0.448102	-0.522546	-0.537925	-0.423604	-0.44821	-0.220898	-0.20794	-0.273544	-0.29218	-0.365479	-0.322975	-0.354653	-0.346092	-0.28603	-0.260954	-0.232356	-0.244228	-0.202971	-0.216841	-0.204295	-0.176067	-0.164091	-0.137093	-0.127212	-0.154492	-0.147545	-0.150079	-0.123354	-0.114562	-0.100451	-0.1575	-0.179032	-0.180027	-0.206152	-0.203459	-0.17549	-0.418549	-0.419461	-0.430225
	190831	-0.563022	-0.600301	-0.613666	-0.511365	-0.406696	-0.385721	-0.356237	-0.34696	-0.326248	-0.470915	-0.521095	-0.511616	-0.426404	-0.425265	-0.185917	-0.170719	-0.219015	-0.237311	-0.32415	-0.296518	-0.320626	-0.318939	-0.261947	-0.254153	-0.269063	-0.2503	-0.213591	-0.233364	-0.204984	-0.175259	-0.164721	-0.135596	-0.128846	-0.150295	-0.148293	-0.148891	-0.132489	-0.115986	-0.102195	-0.137852	-0.162116	-0.162874	-0.183496	-0.192405	-0.166571	-0.527661	-0.531261	-0.541693
	189702	-0.502004	-0.527314	-0.543823	-0.505652	-0.372037	-0.336749	-0.317978	-0.324969	-0.328847	-0.548063	-0.579903	-0.552121	-0.493395	-0.47346	-0.234103	-0.217485	-0.248864	-0.266177	-0.361821	-0.347796	-0.364718	-0.368749	-0.316413	-0.321771	-0.362684	-0.326771	-0.294131	-0.316927	-0.279332	-0.249449	-0.240162	-0.210341	-0.205851	-0.222828	-0.224235	-0.223516	-0.214267	-0.193147	-0.179871	-0.199529	-0.225212	-0.225772	-0.241633	-0.258948	-0.235371	-0.564858	-0.57417	-0.585038
	187249	-0.459663	-0.491354	-0.507218	-0.454707	-0.31941	-0.285765	-0.264671	-0.270042	-0.273624	-0.516882	-0.541917	-0.507639	-0.455029	-0.428178	-0.183854	-0.166703	-0.195085	-0.212472	-0.311284	-0.300155	-0.315619	-0.321154	-0.269064	-0.278888	-0.33435	-0.287684	-0.256315	-0.281138	-0.238393	-0.207974	-0.199095	-0.168602	-0.165049	-0.180311	-0.183179	-0.181882	-0.175808	-0.152281	-0.139109	-0.152781	-0.179209	-0.179709	-0.194232	-0.214596	-0.191538	-0.610137	-0.618166	-0.628465
	183208	-0.524131	-0.555736	-0.570785	-0.501924	-0.38069	-0.35194	-0.328028	-0.327556	-0.320448	-0.510345	-0.549444	-0.528828	-0.459062	-0.446468	-0.205922	-0.189826	-0.228374	-0.24617	-0.338539	-0.31884	-0.338788	-0.340496	-0.286016	-0.286167	-0.317664	-0.287777	-0.253441	-0.275227	-0.240923	-0.210973	-0.201169	-0.171502	-0.16613	-0.184887	-0.184988	-0.184772	-0.172773	-0.153322	-0.139805	-0.165771	-0.19098	-0.191621	-0.209443	-0.223485	-0.19893	-0.555912	-0.562515	-0.57313
	188558	-0.529045	-0.562664	-0.577261	-0.499046	-0.381434	-0.354655	-0.329184	-0.326487	-0.316168	-0.498147	-0.539137	-0.520425	-0.447659	-0.437003	-0.196078	-0.180127	-0.220656	-0.238587	-0.33005	-0.308794	-0.329571	-0.330645	-0.275574	-0.274341	-0.303516	-0.275077	-0.240301	-0.261843	-0.22836	-0.19839	-0.188452	-0.158824	-0.153226	-0.172441	-0.172205	-0.172118	-0.159419	-0.140392	-0.126814	-0.154427	-0.179508	-0.18017	-0.198515	-0.211687	-0.186875	-0.554397	-0.560168	-0.570686
	185723	-0.324692	-0.358565	-0.375305	-0.345936	-0.188091	-0.147265	-0.13042	-0.145067	-0.16679	-0.507116	-0.504916	-0.44519	-0.425288	-0.37168	-0.122907	-0.104015	-0.113313	-0.129742	-0.239242	-0.244138	-0.251083	-0.263686	-0.216645	-0.244671	-0.346113	-0.267156	-0.241898	-0.272328	-0.213758	-0.182821	-0.175837	-0.14416	-0.144157	-0.152493	-0.16064	-0.15728	-0.162732	-0.131642	-0.11932	-0.109302	-0.137685	-0.137912	-0.146005	-0.178088	-0.158184	-0.711159	-0.720986	-0.730348
	187635	-0.443851	-0.487686	-0.501395	-0.404172	-0.280836	-0.255616	-0.227146	-0.223236	-0.215017	-0.447972	-0.474513	-0.442121	-0.383519	-0.35834	-0.109199	-0.0921832	-0.125338	-0.143237	-0.241085	-0.226601	-0.2439	-0.248308	-0.194362	-0.202642	-0.260914	-0.211213	-0.179296	-0.204769	-0.161063	-0.130204	-0.121173	-0.0903493	-0.0867129	-0.102273	-0.105053	-0.103776	-0.0976485	-0.0738213	-0.0605339	-0.0754786	-0.101982	-0.102511	-0.117857	-0.137417	-0.113871	-0.638757	-0.642781	-0.652276
	190369	-0.455905	-0.49659	-0.51078	-0.423272	-0.298332	-0.271453	-0.244561	-0.242397	-0.236015	-0.465659	-0.493469	-0.462145	-0.403061	-0.379083	-0.131419	-0.114475	-0.147595	-0.165424	-0.262861	-0.248244	-0.2656	-0.269862	-0.216075	-0.223639	-0.278435	-0.231439	-0.199291	-0.224263	-0.181753	-0.151036	-0.141929	-0.11126	-0.107431	-0.123334	-0.125817	-0.124659	-0.11785	-0.0945549	-0.0812456	-0.0973032	-0.123669	-0.124207	-0.139736	-0.158787	-0.135173	-0.625519	-0.630429	-0.640179
	172266	-0.50413	-0.553889	-0.565598	-0.428464	-0.326613	-0.310978	-0.275824	-0.260951	-0.235294	-0.405025	-0.447396	-0.430741	-0.350803	-0.341876	-0.0950038	-0.0792351	-0.125654	-0.144208	-0.234383	-0.209022	-0.232027	-0.231737	-0.17442	-0.171489	-0.205237	-0.17219	-0.136883	-0.159351	-0.124356	-0.0938586	-0.0837782	-0.0537551	-0.0481282	-0.0675613	-0.0673123	-0.0672106	-0.0546943	-0.0351641	-0.0214803	-0.050262	-0.0754229	-0.0761177	-0.0953912	-0.107692	-0.0823471	-0.593212	-0.59367	-0.603074
	174878	-0.523424	-0.572377	-0.583972	-0.444919	-0.346511	-0.331799	-0.296304	-0.28031	-0.252285	-0.406991	-0.453324	-0.44054	-0.356045	-0.351168	-0.10589	-0.0904325	-0.139478	-0.158104	-0.246392	-0.218764	-0.242942	-0.241608	-0.183756	-0.17811	-0.204691	-0.176734	-0.140627	-0.162154	-0.129701	-0.0993912	-0.0890591	-0.0593208	-0.0531749	-0.0735901	-0.0725422	-0.0727536	-0.0585281	-0.0402173	-0.0264513	-0.0587064	-0.0834876	-0.084221	-0.104388	-0.114889	-0.0891598	-0.575219	-0.575506	-0.585043
	184492	-0.545067	-0.590653	-0.602618	-0.47146	-0.373577	-0.357874	-0.32365	-0.308633	-0.28097	-0.424086	-0.473791	-0.464176	-0.376713	-0.375224	-0.132329	-0.117123	-0.167591	-0.186184	-0.272983	-0.24397	-0.268849	-0.266793	-0.208816	-0.200985	-0.220326	-0.197734	-0.160983	-0.181508	-0.151601	-0.121544	-0.111006	-0.0815864	-0.0749741	-0.0962465	-0.0944764	-0.094974	-0.0791673	-0.0620416	-0.0482165	-0.0834329	-0.10786	-0.108624	-0.129451	-0.138466	-0.112471	-0.552632	-0.553635	-0.563476
	174717	-0.572317	-0.621064	-0.631904	-0.479874	-0.393582	-0.383026	-0.345365	-0.324619	-0.287957	-0.398426	-0.455888	-0.454263	-0.356304	-0.363018	-0.122185	-0.107676	-0.164721	-0.183575	-0.266112	-0.231669	-0.259356	-0.254918	-0.195451	-0.181988	-0.189049	-0.174801	-0.136498	-0.155448	-0.130007	-0.100251	-0.0892285	-0.0603304	-0.0527476	-0.075875	-0.0725925	-0.0736777	-0.0547389	-0.0398324	-0.0258667	-0.0678995	-0.091548	-0.0923915	-0.115121	-0.120433	-0.0936366	-0.528288	-0.527369	-0.537094
	175428	-0.546249	-0.59661	-0.607544	-0.456276	-0.365595	-0.354072	-0.316553	-0.296968	-0.263053	-0.393812	-0.446006	-0.439164	-0.347063	-0.34832	-0.104784	-0.0898333	-0.143551	-0.162352	-0.247553	-0.216029	-0.242223	-0.239162	-0.180269	-0.170437	-0.18739	-0.166064	-0.128777	-0.149063	-0.120082	-0.0900088	-0.0793083	-0.0499671	-0.0430785	-0.0649105	-0.0627102	-0.0633704	-0.0467345	-0.0301311	-0.0162529	-0.0536537	-0.0778577	-0.0786508	-0.100224	-0.10797	-0.0816418	-0.554661	-0.553828	-0.563357
	182421	-0.368325	-0.422162	-0.434626	-0.31486	-0.190354	-0.168187	-0.136229	-0.12967	-0.121034	-0.390651	-0.405634	-0.362945	-0.315159	-0.278898	-0.0247206	-0.007042	-0.0348461	-0.0526401	-0.154467	-0.144933	-0.159613	-0.166442	-0.113583	-0.129119	-0.210654	-0.143842	-0.114426	-0.142919	-0.0912719	-0.0599213	-0.0516781	-0.0201366	-0.0180915	-0.0306266	-0.0357802	-0.0335644	-0.0327534	-0.00525769	0.00768851	0.00280504	-0.0245922	-0.0250157	-0.0379606	-0.0622984	-0.0399073	-0.705395	-0.707239	-0.715672
	187088	-0.497874	-0.557262	-0.566963	-0.391229	-0.302412	-0.29468	-0.253236	-0.229836	-0.192843	-0.343807	-0.38944	-0.376757	-0.28963	-0.284538	-0.0362588	-0.020902	-0.0725983	-0.0914977	-0.17909	-0.149724	-0.174813	-0.172955	-0.114156	-0.108356	-0.140154	-0.107664	-0.0716856	-0.094006	-0.0599038	-0.0293606	-0.0190793	0.0108426	0.0167985	-0.00331252	-0.0025308	-0.00262643	0.010826	0.0297691	0.0434984	0.0118363	-0.0129844	-0.0137217	-0.0340753	-0.0445583	-0.018759	-0.603132	-0.600039	-0.608756
	190226	-0.544501	-0.603016	-0.612171	-0.427072	-0.34853	-0.344083	-0.301055	-0.273834	-0.229589	-0.34071	-0.396545	-0.393991	-0.294741	-0.300198	-0.0559802	-0.0414662	-0.100289	-0.119391	-0.201872	-0.166409	-0.194644	-0.189999	-0.129752	-0.116851	-0.13056	-0.110827	-0.0728155	-0.0927543	-0.0651172	-0.0350699	-0.0241497	0.00501857	0.0122988	-0.010315	-0.00748234	-0.00838063	0.00942162	0.0252398	0.0391639	-0.00145397	-0.0252612	-0.0260989	-0.0487847	-0.0545588	-0.0277749	-0.558972	-0.555016	-0.56397
	179930	0.733829	0.800571	0.780719	0.340267	0.56097	0.661808	0.586533	0.467125	0.275755	-0.399179	-0.219548	-0.0481875	-0.291514	-0.113451	-0.116194	-0.104344	0.0461103	0.0553787	-0.018246	-0.140325	-0.0751424	-0.126713	-0.170184	-0.293955	-0.562306	-0.380845	-0.422384	-0.45318	-0.360641	-0.360145	-0.372913	-0.367542	-0.390207	-0.34514	-0.378647	-0.365655	-0.437825	-0.392523	-0.398511	-0.242465	-0.254315	-0.252415	-0.206965	-0.285476	-0.308235	-0.443677	-0.481491	-0.481045
	181810	0.885317	0.932126	0.919859	0.559606	0.732178	0.809748	0.745139	0.644767	0.475726	-0.147401	0.0392741	0.204681	-0.0427117	0.131589	0.0911481	0.0996209	0.249268	0.261104	0.207211	0.0869566	0.152968	0.103536	0.0526366	-0.0693965	-0.34151	-0.156688	-0.204503	-0.232805	-0.143709	-0.148253	-0.162837	-0.162626	-0.186506	-0.137691	-0.171456	-0.158367	-0.233858	-0.19116	-0.199696	-0.0390621	-0.0461674	-0.0441778	0.00366054	-0.0713318	-0.0982646	-0.402179	-0.430212	-0.425816
	182658	0.824452	0.865619	0.849991	0.491802	0.695712	0.781788	0.719802	0.615826	0.441507	-0.24889	-0.0612413	0.116115	-0.12844	0.0566486	0.0634159	0.0755322	0.224056	0.232808	0.157774	0.0360856	0.101041	0.0490087	0.00687203	-0.120918	-0.412947	-0.212741	-0.255875	-0.29003	-0.189565	-0.188227	-0.20152	-0.195268	-0.219212	-0.171852	-0.207266	-0.1935	-0.270224	-0.22149	-0.227697	-0.0646721	-0.0772208	-0.0752678	-0.0288103	-0.110175	-0.133395	-0.537532	-0.567754	-0.565186
	182329	-0.630595	-0.57979	-0.604843	-0.807478	-0.650744	-0.580365	-0.60315	-0.653211	-0.706725	-0.853538	-0.896887	-0.887437	-0.842492	-0.841947	-0.677277	-0.664517	-0.681063	-0.693249	-0.767136	-0.759617	-0.771092	-0.77414	-0.737016	-0.732981	-0.706859	-0.725387	-0.695942	-0.705612	-0.695267	-0.673751	-0.665199	-0.643737	-0.637164	-0.655961	-0.652608	-0.653865	-0.635645	-0.627201	-0.616159	-0.647484	-0.666283	-0.666833	-0.681238	-0.688933	-0.669386	-0.203966	-0.232829	-0.247244
	187890	-0.646479	-0.611317	-0.634504	-0.779721	-0.632719	-0.571339	-0.584015	-0.622521	-0.660598	-0.797876	-0.846731	-0.84023	-0.782659	-0.785288	-0.603655	-0.590395	-0.615704	-0.629416	-0.705899	-0.692403	-0.707573	-0.7089	-0.666624	-0.659546	-0.635121	-0.650836	-0.618674	-0.629778	-0.617724	-0.594281	-0.584949	-0.561747	-0.554576	-0.575099	-0.57129	-0.572698	-0.553054	-0.543833	-0.531945	-0.567628	-0.587597	-0.588232	-0.604901	-0.611533	-0.590013	-0.257549	-0.281903	-0.295949
	181588	-0.282687	-0.253002	-0.279597	-0.495506	-0.277653	-0.193345	-0.218448	-0.284923	-0.376462	-0.799859	-0.772086	-0.691784	-0.726063	-0.651481	-0.44897	-0.430115	-0.40155	-0.413103	-0.523716	-0.555823	-0.547092	-0.568866	-0.539293	-0.584489	-0.692202	-0.615	-0.599112	-0.626949	-0.568546	-0.542578	-0.538323	-0.510689	-0.513478	-0.514854	-0.52615	-0.521653	-0.534513	-0.503002	-0.49306	-0.461797	-0.488277	-0.488148	-0.486974	-0.527749	-0.514408	-0.562373	-0.592747	-0.604636
	3565354	-0.611141	-0.597567	-0.618676	-0.697788	-0.554042	-0.501493	-0.502595	-0.529751	-0.555077	-0.720753	-0.765458	-0.752128	-0.691589	-0.687144	-0.481046	-0.46638	-0.495261	-0.510599	-0.595085	-0.580419	-0.596901	-0.598932	-0.551933	-0.548493	-0.545669	-0.544066	-0.510859	-0.526232	-0.505239	-0.479009	-0.469436	-0.443415	-0.436941	-0.456846	-0.454654	-0.455397	-0.438708	-0.425265	-0.412607	-0.444101	-0.46646	-0.467091	-0.48406	-0.494229	-0.47141	-0.371224	-0.39039	-0.403563
	181087	-0.529946	-0.509966	-0.533132	-0.657397	-0.489973	-0.426873	-0.435691	-0.47533	-0.520881	-0.760593	-0.785661	-0.75353	-0.719267	-0.695279	-0.488696	-0.472704	-0.48541	-0.499795	-0.592497	-0.591015	-0.600478	-0.608117	-0.565679	-0.57578	-0.602825	-0.580925	-0.552199	-0.571057	-0.539722	-0.51335	-0.505157	-0.478467	-0.474478	-0.489466	-0.490965	-0.490275	-0.481522	-0.463025	-0.450994	-0.465414	-0.489131	-0.489556	-0.501603	-0.520399	-0.500011	-0.423286	-0.446339	-0.459422
	190971	-0.566621	-0.543305	-0.566393	-0.692805	-0.531713	-0.469643	-0.478858	-0.517392	-0.559699	-0.769174	-0.801702	-0.777244	-0.735108	-0.719119	-0.518106	-0.502841	-0.519935	-0.534271	-0.622623	-0.61716	-0.628599	-0.634273	-0.591397	-0.596248	-0.608365	-0.597251	-0.567244	-0.583976	-0.558103	-0.532385	-0.52378	-0.49792	-0.492942	-0.509722	-0.50963	-0.509566	-0.497487	-0.481612	-0.469532	-0.490558	-0.513318	-0.513812	-0.527415	-0.542603	-0.521686	-0.379617	-0.402769	-0.416138
	179776	-0.494344	-0.463742	-0.48867	-0.659573	-0.478341	-0.406626	-0.423544	-0.473785	-0.534718	-0.805835	-0.821179	-0.780854	-0.762406	-0.729864	-0.531711	-0.515489	-0.517912	-0.531182	-0.625563	-0.631862	-0.636928	-0.647456	-0.609263	-0.625727	-0.662333	-0.634814	-0.609035	-0.628383	-0.594289	-0.568839	-0.561525	-0.53547	-0.532658	-0.545045	-0.548076	-0.546804	-0.541558	-0.521673	-0.510287	-0.516464	-0.540081	-0.54039	-0.549542	-0.571952	-0.553419	-0.413762	-0.440625	-0.453902
	3565591	-0.459762	-0.428568	-0.453953	-0.635468	-0.446915	-0.372419	-0.391197	-0.444854	-0.511839	-0.810245	-0.818116	-0.770731	-0.76166	-0.72173	-0.522731	-0.506018	-0.502843	-0.515814	-0.613219	-0.62416	-0.626757	-0.639304	-0.602628	-0.624153	-0.672899	-0.636956	-0.612861	-0.633668	-0.595383	-0.569822	-0.563029	-0.536673	-0.534823	-0.545323	-0.549786	-0.547956	-0.545818	-0.523913	-0.51276	-0.512436	-0.536585	-0.536818	-0.544164	-0.569821	-0.552174	-0.438468	-0.466213	-0.479323
	180151	-0.589379	-0.561752	-0.585031	-0.720435	-0.562352	-0.499798	-0.510608	-0.549912	-0.592048	-0.782299	-0.819156	-0.799508	-0.753695	-0.742708	-0.547691	-0.532984	-0.551901	-0.566003	-0.651068	-0.643695	-0.655986	-0.660556	-0.618058	-0.619752	-0.621537	-0.618098	-0.58758	-0.602684	-0.580734	-0.555711	-0.546928	-0.52186	-0.516291	-0.534056	-0.532948	-0.533289	-0.519143	-0.505147	-0.493143	-0.518072	-0.54003	-0.54056	-0.55492	-0.567803	-0.546787	-0.343013	-0.366824	-0.380435
	183987	-0.55734	-0.523726	-0.548188	-0.713219	-0.544378	-0.475929	-0.491865	-0.538336	-0.591293	-0.810038	-0.838686	-0.811694	-0.778116	-0.759476	-0.568189	-0.553124	-0.564269	-0.577682	-0.665082	-0.663772	-0.672719	-0.679678	-0.639984	-0.647177	-0.659096	-0.649163	-0.62085	-0.636853	-0.611647	-0.587015	-0.578899	-0.553992	-0.549437	-0.56507	-0.565371	-0.565171	-0.554154	-0.53855	-0.526961	-0.544849	-0.567022	-0.567459	-0.579555	-0.595742	-0.576039	-0.348883	-0.375149	-0.388825
	13217335	0.590131	0.642506	0.652227	0.479724	0.403788	0.398107	0.357102	0.331015	0.286274	0.370415	0.433841	0.438531	0.33212	0.345271	0.106037	0.0921082	0.154569	0.173636	0.252624	0.213744	0.243714	0.237343	0.176668	0.158763	0.156726	0.14856	0.109097	0.12687	0.104797	0.0752897	0.0639061	0.0354362	0.0271197	0.0516451	0.0472044	0.0487384	0.0274425	0.0142335	0.000179362	0.0474661	0.0704736	0.0713798	0.0956006	0.0979825	0.0705816	0.511593	0.508772	0.5183
	3565263	0.603094	0.655468	0.664939	0.488508	0.416239	0.411835	0.370191	0.342691	0.295431	0.366781	0.433303	0.441178	0.331017	0.347463	0.109754	0.0961143	0.160817	0.179929	0.25717	0.216368	0.247316	0.240059	0.178985	0.158865	0.151312	0.147021	0.106981	0.124004	0.103943	0.0746271	0.0630606	0.0348631	0.0261482	0.0514157	0.0463447	0.0481253	0.025517	0.0132897	-0.000804158	0.0492132	0.0718696	0.0728062	0.0977323	0.0986277	0.0709544	0.497885	0.494683	0.504243
	186723	0.304542	0.32426	0.343629	0.373726	0.197226	0.144891	0.138087	0.166065	0.206391	0.581415	0.570226	0.502088	0.498159	0.435986	0.194137	0.174805	0.173291	0.188699	0.301128	0.314205	0.316648	0.332341	0.289293	0.323708	0.433035	0.349875	0.32713	0.357984	0.29692	0.266664	0.26043	0.229136	0.230174	0.236239	0.245811	0.241914	0.250433	0.217991	0.206151	0.188437	0.216977	0.217094	0.222428	0.258264	0.239967	0.697165	0.712126	0.722104
	13224091	0.383926	0.414153	0.43107	0.402619	0.250866	0.210925	0.194033	0.207091	0.224216	0.528086	0.536616	0.486694	0.454834	0.411624	0.165302	0.147051	0.163025	0.179756	0.285342	0.284504	0.294504	0.304516	0.255761	0.276792	0.359062	0.293801	0.266135	0.29419	0.242172	0.211488	0.203755	0.172575	0.171147	0.182249	0.188283	0.185752	0.186536	0.158533	0.145869	0.145177	0.172802	0.173134	0.183668	0.21123	0.190117	0.664761	0.674806	0.684755
	186462	0.389609	0.4274	0.442859	0.383128	0.241397	0.207613	0.185496	0.191577	0.199113	0.48576	0.498355	0.452464	0.413018	0.373859	0.124647	0.106656	0.12787	0.145059	0.248949	0.244145	0.256298	0.2648	0.214222	0.232226	0.311182	0.24756	0.218814	0.246685	0.19578	0.164835	0.15678	0.125483	0.123597	0.13569	0.141076	0.138788	0.138231	0.11086	0.0980086	0.100819	0.128305	0.128687	0.140491	0.166244	0.144434	0.67246	0.679751	0.689303
	184664	0.57185	0.598514	0.613767	0.551435	0.435797	0.40727	0.384414	0.383549	0.373739	0.530113	0.57807	0.56619	0.487344	0.483936	0.249058	0.233715	0.277181	0.29497	0.382833	0.358664	0.380872	0.380385	0.325262	0.319382	0.3332	0.316146	0.280161	0.299503	0.271531	0.242225	0.231894	0.20307	0.196512	0.217454	0.215692	0.21621	0.20023	0.183787	0.170146	0.203916	0.228133	0.228856	0.248531	0.258481	0.233213	0.504821	0.511972	0.523062
	176417	0.538308	0.566927	0.582331	0.5215	0.40001	0.370125	0.347535	0.348285	0.342175	0.525018	0.56613	0.547459	0.476269	0.465762	0.227396	0.211475	0.250577	0.268294	0.359638	0.339291	0.359544	0.360857	0.306493	0.305339	0.33196	0.305756	0.27109	0.292161	0.259603	0.229886	0.219972	0.190573	0.184915	0.204177	0.203819	0.203786	0.190791	0.172148	0.15862	0.18637	0.211312	0.211969	0.230138	0.243257	0.218597	0.538784	0.546094	0.55694
	4363083	0.538805	0.564785	0.580667	0.530121	0.405664	0.373816	0.35294	0.355901	0.352728	0.539559	0.579791	0.560232	0.491032	0.479654	0.242426	0.226454	0.264117	0.28169	0.373385	0.354096	0.373769	0.375463	0.321641	0.321175	0.348043	0.321903	0.2875	0.30852	0.275892	0.246283	0.236446	0.207117	0.20155	0.2206	0.220363	0.220286	0.207533	0.188824	0.175347	0.202345	0.22729	0.227935	0.245787	0.259297	0.234822	0.534066	0.542283	0.55328
	175114	0.532527	0.551252	0.568513	0.547981	0.414021	0.376302	0.360454	0.370103	0.376143	0.579461	0.615705	0.592257	0.530453	0.515155	0.280926	0.264718	0.297289	0.314405	0.407651	0.392208	0.409784	0.412936	0.360923	0.363391	0.393499	0.365751	0.332428	0.353615	0.319921	0.290591	0.281077	0.251887	0.246771	0.264839	0.265233	0.264919	0.253486	0.234177	0.220894	0.244465	0.269521	0.270117	0.286722	0.301974	0.278198	0.52637	0.537217	0.548579
	177179	0.469693	0.490635	0.508313	0.495407	0.350077	0.309153	0.29466	0.308221	0.322303	0.574441	0.59773	0.561691	0.514944	0.486466	0.247519	0.230316	0.254173	0.271014	0.370298	0.362334	0.376023	0.382594	0.332442	0.343769	0.397012	0.352871	0.322207	0.346401	0.304531	0.274643	0.265962	0.235896	0.232474	0.247322	0.25031	0.24898	0.243112	0.21988	0.206884	0.21911	0.245364	0.245833	0.259492	0.280588	0.258107	0.58321	0.59472	0.605661
	190829	0.55958	0.594063	0.608031	0.517971	0.408834	0.385319	0.357862	0.351415	0.334673	0.487983	0.536217	0.524717	0.442832	0.439656	0.200858	0.185498	0.231536	0.249676	0.337533	0.311656	0.334833	0.333849	0.277532	0.271211	0.288242	0.268238	0.231978	0.251962	0.222815	0.193121	0.182719	0.15356	0.147035	0.168023	0.16636	0.166829	0.151114	0.134201	0.120469	0.15443	0.178831	0.179567	0.199628	0.209459	0.183897	0.527559	0.532258	0.542847
	180130	0.544072	0.579286	0.593352	0.504654	0.392634	0.368368	0.341146	0.335588	0.320745	0.486521	0.531533	0.516841	0.438627	0.432117	0.191802	0.176174	0.220099	0.238195	0.327674	0.303633	0.325868	0.325739	0.269813	0.265719	0.288678	0.264453	0.228823	0.2496	0.218333	0.188459	0.178256	0.148838	0.142736	0.162931	0.161925	0.162137	0.147817	0.129885	0.11621	0.14734	0.172074	0.172778	0.192122	0.20344	0.178173	0.542893	0.547724	0.558209
	180145	0.534605	0.570119	0.584269	0.49695	0.383035	0.358212	0.331226	0.326325	0.312793	0.486337	0.529339	0.512661	0.436792	0.428211	0.187062	0.17127	0.213831	0.23189	0.322363	0.299496	0.321125	0.321536	0.265883	0.26318	0.289752	0.262969	0.227739	0.248993	0.216437	0.186464	0.176386	0.146818	0.140978	0.160679	0.160078	0.160131	0.146675	0.128122	0.114485	0.143851	0.168783	0.169468	0.188357	0.200598	0.175524	0.551903	0.55686	0.567289
	172013	0.665388	0.698353	0.710662	0.595213	0.513237	0.498649	0.467049	0.450637	0.415496	0.469426	0.542043	0.55544	0.444516	0.467151	0.240492	0.227362	0.290596	0.309068	0.383444	0.342763	0.373479	0.36564	0.30628	0.282648	0.255753	0.266729	0.225887	0.239913	0.226725	0.198532	0.186681	0.159651	0.149974	0.176835	0.170198	0.172615	0.146499	0.137344	0.123283	0.178736	0.200408	0.201381	0.226954	0.225165	0.197456	0.416677	0.418903	0.429882
	176208	0.606184	0.63807	0.651755	0.558763	0.458418	0.437059	0.409113	0.400178	0.377933	0.49298	0.550935	0.549188	0.456387	0.463387	0.229873	0.215365	0.267657	0.285879	0.368598	0.337237	0.363204	0.359629	0.302286	0.289195	0.287979	0.281007	0.242914	0.260411	0.23784	0.208773	0.19779	0.169495	0.161694	0.185051	0.181384	0.18264	0.162688	0.148939	0.135068	0.17759	0.200918	0.201746	0.223941	0.229215	0.202817	0.47878	0.48316	0.494062
	186680	0.616643	0.649744	0.663001	0.562024	0.466086	0.446689	0.417426	0.406303	0.380622	0.483243	0.544162	0.545459	0.448644	0.45877	0.226006	0.211763	0.266569	0.284893	0.366001	0.332564	0.359606	0.355123	0.297203	0.281964	0.276071	0.272275	0.233585	0.250485	0.229612	0.200655	0.189486	0.161385	0.153214	0.177281	0.173037	0.174517	0.153369	0.140464	0.126536	0.171662	0.194697	0.195556	0.218479	0.222342	0.195635	0.469587	0.473233	0.484093
	180088	0.873154	0.91024	0.914835	0.699616	0.710487	0.729452	0.682729	0.632141	0.539392	0.308868	0.442015	0.523419	0.338822	0.430846	0.254495	0.248811	0.35706	0.375129	0.404844	0.324789	0.374704	0.347973	0.284352	0.214599	0.0738086	0.164898	0.11506	0.112182	0.142652	0.120839	0.10606	0.0871091	0.0697376	0.110212	0.090646	0.0981282	0.0462756	0.0587685	0.0450632	0.154644	0.166889	0.168442	0.207266	0.173379	0.142063	0.102578	0.0941108	0.104328
	185654	0.890881	0.92192	0.927098	0.729077	0.739746	0.756496	0.712741	0.664889	0.574833	0.332364	0.468061	0.552509	0.367005	0.462227	0.292231	0.286975	0.395232	0.412943	0.440185	0.359649	0.409654	0.382399	0.319705	0.248081	0.0991844	0.196544	0.146613	0.142341	0.175954	0.154858	0.140029	0.121836	0.104088	0.145114	0.124848	0.132613	0.0793587	0.0933309	0.079762	0.1917	0.203258	0.204827	0.24392	0.208535	0.177363	0.0676597	0.0605783	0.0711137
	185955	0.851282	0.873345	0.882438	0.742262	0.716389	0.717367	0.682571	0.650777	0.585049	0.433516	0.551632	0.61514	0.453522	0.527688	0.342777	0.335052	0.427886	0.44565	0.487745	0.420366	0.463989	0.442898	0.381796	0.324328	0.206363	0.282565	0.235003	0.235442	0.256756	0.233661	0.219607	0.198862	0.183268	0.22053	0.203998	0.210307	0.164202	0.171915	0.158103	0.254223	0.268819	0.270213	0.305271	0.27978	0.249566	0.14632	0.145128	0.156604
	174905	0.807506	0.840567	0.84895	0.681902	0.65184	0.655271	0.615742	0.580582	0.512752	0.397536	0.507842	0.562299	0.40612	0.470875	0.27183	0.262949	0.353476	0.371912	0.420767	0.356275	0.39875	0.379579	0.317014	0.265337	0.168119	0.228677	0.181768	0.185627	0.198939	0.174216	0.16041	0.137875	0.123373	0.158911	0.144327	0.149858	0.107658	0.111552	0.0974799	0.186483	0.202807	0.204143	0.238021	0.216913	0.186632	0.226492	0.223258	0.234173
	181826	0.797031	0.822659	0.832979	0.700997	0.655643	0.651159	0.617306	0.590644	0.534923	0.45153	0.555375	0.602531	0.456644	0.514085	0.313476	0.303852	0.387452	0.405609	0.459015	0.400093	0.439726	0.422935	0.361893	0.315336	0.2269	0.281901	0.236172	0.24118	0.251084	0.226063	0.212624	0.189572	0.175828	0.209926	0.196578	0.201633	0.161836	0.163941	0.149918	0.233195	0.250313	0.251578	0.283745	0.26603	0.236388	0.238133	0.238188	0.249626
	185954	0.812681	0.837195	0.84722	0.713513	0.673249	0.67013	0.636094	0.608142	0.549816	0.447975	0.555767	0.607381	0.457176	0.519189	0.322739	0.313621	0.399737	0.417796	0.468187	0.406962	0.447688	0.42973	0.368645	0.319103	0.222527	0.28338	0.237121	0.240883	0.253909	0.229396	0.21578	0.19334	0.179083	0.214066	0.199842	0.205242	0.163697	0.167332	0.153355	0.240177	0.256623	0.257924	0.290894	0.271061	0.241245	0.212992	0.212763	0.224233
	186258	0.69252	0.696393	0.713369	0.703409	0.596701	0.563241	0.549326	0.554418	0.546659	0.618616	0.687281	0.697186	0.601285	0.620763	0.410942	0.397898	0.449437	0.46632	0.540645	0.507968	0.534092	0.528721	0.474856	0.454513	0.419561	0.438851	0.399974	0.411889	0.401998	0.375529	0.364225	0.338668	0.329249	0.3551	0.348576	0.350987	0.325076	0.317197	0.303701	0.35599	0.376875	0.37777	0.401122	0.400687	0.374627	0.335428	0.346815	0.359442
	180129	0.714576	0.735701	0.749187	0.665178	0.583817	0.565268	0.538993	0.527203	0.495838	0.519744	0.599829	0.621118	0.50531	0.536298	0.320873	0.308618	0.373664	0.391628	0.460903	0.417852	0.449565	0.440139	0.381828	0.353054	0.306743	0.332439	0.290691	0.301673	0.295705	0.268762	0.256595	0.230951	0.220211	0.24884	0.240404	0.24354	0.213662	0.207893	0.19394	0.256107	0.27644	0.277471	0.30421	0.298627	0.270783	0.343667	0.348512	0.360262
	180150	0.741929	0.770138	0.781562	0.659687	0.596644	0.58695	0.554495	0.533032	0.48725	0.466592	0.556609	0.588508	0.458277	0.500047	0.287052	0.275783	0.350166	0.368511	0.431749	0.381088	0.416717	0.403998	0.343579	0.307336	0.246257	0.281724	0.238049	0.24713	0.246658	0.220116	0.207349	0.18241	0.170458	0.2014	0.191047	0.194925	0.161168	0.158189	0.144094	0.215015	0.234273	0.235409	0.264666	0.254163	0.225301	0.318252	0.319578	0.330916
	3565987	0.736038	0.764518	0.776044	0.655154	0.590377	0.580178	0.547864	0.526915	0.482132	0.467784	0.556374	0.586726	0.458114	0.498291	0.284128	0.272698	0.346131	0.364488	0.428688	0.378874	0.414088	0.401782	0.341448	0.306257	0.247965	0.281443	0.237993	0.247481	0.245962	0.219277	0.206582	0.181463	0.169697	0.200308	0.190261	0.194019	0.160884	0.157394	0.143298	0.212946	0.232412	0.233535	0.262488	0.252714	0.223942	0.326247	0.327693	0.339015
	13219566	0.91039	0.877584	0.892593	0.930015	0.886784	0.86216	0.858323	0.858831	0.831647	0.639212	0.760419	0.833527	0.688476	0.772614	0.645901	0.641028	0.719381	0.732924	0.759035	0.69927	0.737209	0.716484	0.668291	0.606948	0.447483	0.558278	0.514735	0.506164	0.54528	0.52877	0.51576	0.501483	0.485075	0.522132	0.503017	0.510422	0.459971	0.476012	0.464238	0.564413	0.573818	0.575148	0.607754	0.576897	0.550615	-0.108767	-0.0958282	-0.0821983
	191303	0.755795	0.730243	0.749938	0.826716	0.718105	0.673504	0.674749	0.694138	0.701564	0.724217	0.801594	0.823601	0.727984	0.76005	0.583713	0.57276	0.621644	0.636445	0.698778	0.665861	0.691183	0.684062	0.63599	0.608666	0.539317	0.585665	0.547496	0.553012	0.556986	0.534331	0.523135	0.50151	0.490745	0.518223	0.508914	0.51246	0.481243	0.479921	0.467365	0.528008	0.545452	0.546383	0.570064	0.563526	0.538856	0.170521	0.188722	0.20264
	192096	0.900677	0.889759	0.882428	0.708012	0.870769	0.924179	0.892841	0.825634	0.696972	0.0232142	0.208892	0.384316	0.160302	0.344352	0.38009	0.392537	0.523828	0.530051	0.45377	0.343409	0.401816	0.352963	0.319327	0.194218	-0.120021	0.100463	0.0594996	0.0207588	0.129622	0.133895	0.121169	0.130028	0.105881	0.152799	0.116661	0.130778	0.0523036	0.104489	0.0990376	0.260772	0.246673	0.248538	0.292297	0.211403	0.190384	-0.696004	-0.710132	-0.704372
	179430	0.976372	0.963743	0.961826	0.816719	0.933972	0.97143	0.942299	0.886039	0.772374	0.187795	0.370154	0.529351	0.307551	0.47681	0.460943	0.469001	0.597506	0.60691	0.556253	0.450539	0.508548	0.463784	0.421479	0.304876	0.0137443	0.217111	0.171356	0.139192	0.234864	0.2326	0.218562	0.220594	0.19673	0.244837	0.210892	0.224124	0.147606	0.192679	0.184643	0.341726	0.333969	0.335844	0.380365	0.307908	0.283055	-0.554475	-0.563238	-0.554846
	183784	0.961896	0.955168	0.951096	0.777718	0.911134	0.956196	0.922906	0.859523	0.736199	0.122881	0.308273	0.473178	0.246135	0.420792	0.413358	0.422471	0.554935	0.563996	0.507063	0.397864	0.457331	0.410784	0.369053	0.248901	-0.0483777	0.158988	0.113572	0.0800436	0.178892	0.177773	0.163814	0.167141	0.142964	0.191393	0.156643	0.170188	0.0925483	0.139378	0.131757	0.291817	0.282696	0.284599	0.329743	0.254493	0.229994	-0.575791	-0.587622	-0.580082
	173029	0.994296	0.998545	0.998924	0.821625	0.906804	0.939473	0.90257	0.84545	0.733267	0.243766	0.41857	0.558609	0.337948	0.48882	0.41438	0.417936	0.546214	0.559252	0.534736	0.432434	0.490728	0.449983	0.397679	0.291464	0.0381096	0.2125	0.162727	0.139294	0.216862	0.207441	0.192354	0.18695	0.16409	0.212134	0.18147	0.193371	0.121454	0.157323	0.146798	0.295533	0.294545	0.296408	0.341349	0.278749	0.250189	-0.349599	-0.358639	-0.349098
	188341	0.996035	0.997571	0.998747	0.833939	0.913148	0.942809	0.907849	0.853761	0.745756	0.267243	0.44039	0.578099	0.360273	0.50888	0.432677	0.435902	0.562164	0.575211	0.55268	0.452044	0.509547	0.469562	0.417441	0.312777	0.0619223	0.23475	0.18511	0.162107	0.238543	0.228862	0.213822	0.208091	0.185414	0.23316	0.202851	0.214616	0.143298	0.178549	0.167952	0.315163	0.314568	0.316414	0.360938	0.299446	0.270931	-0.344461	-0.352253	-0.342436
	180171	0.996035	0.997571	0.998747	0.833939	0.913148	0.942809	0.907849	0.853761	0.745756	0.267243	0.44039	0.578099	0.360273	0.50888	0.432677	0.435902	0.562164	0.575211	0.55268	0.452044	0.509547	0.469562	0.417441	0.312777	0.0619223	0.23475	0.18511	0.162107	0.238543	0.228862	0.213822	0.208091	0.185414	0.23316	0.202851	0.214616	0.143298	0.178549	0.167952	0.315163	0.314568	0.316414	0.360938	0.299446	0.270931	-0.344461	-0.352253	-0.342436
	190993	0.996035	0.997571	0.998747	0.833939	0.913148	0.942809	0.907849	0.853761	0.745756	0.267243	0.44039	0.578099	0.360273	0.50888	0.432677	0.435902	0.562164	0.575211	0.55268	0.452044	0.509547	0.469562	0.417441	0.312777	0.0619223	0.23475	0.18511	0.162107	0.238543	0.228862	0.213822	0.208091	0.185414	0.23316	0.202851	0.214616	0.143298	0.178549	0.167952	0.315163	0.314568	0.316414	0.360938	0.299446	0.270931	-0.344461	-0.352253	-0.342436
	174904	0.969617	0.98887	0.99064	0.7871	0.846453	0.875694	0.832833	0.775503	0.666473	0.266404	0.429325	0.549819	0.336955	0.46845	0.350535	0.350501	0.474806	0.490276	0.486706	0.390151	0.446881	0.410519	0.352042	0.257425	0.0429181	0.18808	0.136895	0.121175	0.181772	0.167076	0.151695	0.140673	0.1194	0.165716	0.13868	0.149127	0.083352	0.110754	0.0986618	0.235798	0.240097	0.241889	0.285677	0.232822	0.202338	-0.17352	-0.18314	-0.173193
	180148	0.980358	0.988202	0.991828	0.829821	0.879228	0.900984	0.865075	0.816242	0.718049	0.325632	0.486939	0.605944	0.399038	0.52918	0.417621	0.417597	0.53727	0.55213	0.548677	0.45531	0.510223	0.47486	0.418507	0.325251	0.107774	0.256059	0.205633	0.189126	0.250927	0.236875	0.221706	0.211228	0.190064	0.235977	0.209005	0.219442	0.153777	0.181633	0.169752	0.305583	0.309606	0.311367	0.354276	0.302012	0.272163	-0.20454	-0.210541	-0.199937
[truncated: 426 more columns]
