# Supplementary material for: The whole transcriptome regulation as a function of mitochondrial polymorphisms and aging in Caenorhabditis elegans
Source: Aging (Albany NY). 2020 Feb 4;12(3):2453–70. doi: 10.18632/aging.102754 (PMC7041728; doi:10.18632/aging.102754)
Supplement: Supplementary Table 8 [file aging-12-102754-s001..xlsx]

## Sheet: Table S8
Sample	TotalRawReads	TotalCleanReads	TotalCleanBase	GCofFq1	GCofFq2	Q20ofFq1	Q20ofFq2	Q30ofFq1	Q30ofFq2	CleanReadsRatio
lnN2D0A1	163278810	126022184	12602218400	0.4823	0.4864	0.9936	0.9795	0.9778	0.9461	0.77182
lnN2D0A2	168177004	126701096	12670109600	0.4877	0.4909	0.9934	0.9808	0.9771	0.9491	0.75338
lnN2D0A3	161646006	125869082	12586908200	0.4807	0.4851	0.994	0.9805	0.9787	0.9484	0.77867
lnN2D12	161647232	126930502	12693050200	0.4641	0.4713	0.9933	0.9801	0.977	0.9473	0.78523
lnN2D6	166545114	126742470	12674247000	0.4596	0.4697	0.9929	0.9796	0.9747	0.9453	0.76101
lnN2D9	142851804	111005616	11100561600	0.4643	0.4712	0.9928	0.9806	0.9744	0.9476	0.77707
lnNCD0A1	161645936	126273022	12627302200	0.48	0.485	0.9936	0.9793	0.978	0.9456	0.78117
lnNCD0A2	161646964	126580068	12658006800	0.4716	0.4766	0.9937	0.9779	0.9784	0.9429	0.78306
lnNCD0A3	163277914	126519406	12651940600	0.4813	0.4877	0.9938	0.9808	0.9784	0.949	0.77487
lnNCD12	161645104	126690718	12669071800	0.466	0.4734	0.9939	0.983	0.9788	0.9543	0.78376
lnNCD6	158381446	126460594	12646059400	0.4608	0.4675	0.9936	0.9784	0.9781	0.9436	0.79846
lnNCD9	160014476	126787212	12678721200	0.4578	0.4643	0.9935	0.9806	0.9779	0.9489	0.79235
The raw data are available at GEO (Accession Number: lncRNA and mRNA: GSE138339)
GCofFq1：read1的GC含量
GCofFq2：read2的GC含量
Q20ofFq1：Q20 ratio of read1
Q20ofFq2：Q20 ratio of read2
Q30ofFq1：Q30 ratio of read1
Q30ofFq2：Q30 ratio of read2
CleanReadsRatio：Clean reads ratio
TotalCleanReadsRatio (%)=Total Clean Reads / Total Raw Reads
